# Supplementary material for: BAP1/ASXL complex modulation regulates epithelial-mesenchymal transition during trophoblast differentiation and invasion
Source: eLife. 2021 Jun 25;10:e63254. doi: 10.7554/eLife.63254 (PMC8233037; doi:10.7554/eLife.63254)
Supplement: Supplementary file 1. [file elife-63254-supp1.xls]

## Sheet: DESeq2_and FPKM FC>2_ 0D
777 genes dysregulated in BAP1 KO mTSC growing in stem cell conditions (0d), called by both DESeq2 and FPKM fold change >2
Probe	Description	Fold change
Ptgs2	prostaglandin-endoperoxide synthase 2 [Source:MGI Symbol;Acc:MGI:97798]	210.975
G0s2	G0/G1 switch gene 2 [Source:MGI Symbol;Acc:MGI:1316737]	80.1004
Gm17067	predicted gene 17067 [Source:MGI Symbol;Acc:MGI:4937894]	73.4797
Hoxc6	predicted gene 20398 [Source:MGI Symbol;Acc:MGI:5141863]	59.1857
S1pr3	sphingosine-1-phosphate receptor 3 [Source:MGI Symbol;Acc:MGI:1339365]	57.4833
Hdx	highly divergent homeobox [Source:MGI Symbol;Acc:MGI:2685226]	54.6945
Usp11	ubiquitin specific peptidase 11 [Source:MGI Symbol;Acc:MGI:2384312]	44.1672
Adcy5	adenylate cyclase 5 [Source:MGI Symbol;Acc:MGI:99673]	41.2124
Igfbp5	insulin-like growth factor binding protein 5 [Source:MGI Symbol;Acc:MGI:96440]	38.006
6330403K07Rik	RIKEN cDNA 6330403K07 gene [Source:MGI Symbol;Acc:MGI:1918001]	36.2506
Slc18a2	solute carrier family 18 (vesicular monoamine), member 2 [Source:MGI Symbol;Acc:MGI:106677]	35.2055
Gm10664	tripartite motif-containing 60 [Source:MGI Symbol;Acc:MGI:2387430]	34.8682
Gabrg3	gamma-aminobutyric acid (GABA) A receptor, subunit gamma 3 [Source:MGI Symbol;Acc:MGI:95624]	27.8455
Pde4b	phosphodiesterase 4B, cAMP specific [Source:MGI Symbol;Acc:MGI:99557]	27.5246
Thbs1	thrombospondin 1 [Source:MGI Symbol;Acc:MGI:98737]	26.9076
Matn1	matrilin 1, cartilage matrix protein [Source:MGI Symbol;Acc:MGI:106591]	24.2647
Mmp16	matrix metallopeptidase 16 [Source:MGI Symbol;Acc:MGI:1276107]	22.7293
Gja1	gap junction protein, alpha 1 [Source:MGI Symbol;Acc:MGI:95713]	22.1177
B230314M03Rik	low density lipoprotein receptor-related protein 8, apolipoprotein e receptor [Source:MGI Symbol;Acc:MGI:1340044]	21.4704
Mid1	midline 1 [Source:MGI Symbol;Acc:MGI:1100537]	21.0281
Synpo2	synaptopodin 2 [Source:MGI Symbol;Acc:MGI:2153070]	20.677
Smoc2	SPARC related modular calcium binding 2 [Source:MGI Symbol;Acc:MGI:1929881]	20.5708
Fut9	fucosyltransferase 9 [Source:MGI Symbol;Acc:MGI:1330859]	20.173
Rimbp2	RIMS binding protein 2 [Source:MGI Symbol;Acc:MGI:2443235]	19.2646
Pik3cg	phosphoinositide-3-kinase, catalytic, gamma polypeptide [Source:MGI Symbol;Acc:MGI:1353576]	18.2974
Angptl2	Ral GEF with PH domain and SH3 binding motif 1 [Source:MGI Symbol;Acc:MGI:1922008]	17.7429
Tmem119	transmembrane protein 119 [Source:MGI Symbol;Acc:MGI:2385228]	16.2943
Pld4	phospholipase D family, member 4 [Source:MGI Symbol;Acc:MGI:2144765]	15.4298
Pde4d	phosphodiesterase 4D, cAMP specific [Source:MGI Symbol;Acc:MGI:99555]	13.858
Fam198b	family with sequence similarity 198, member B [Source:MGI Symbol;Acc:MGI:1915909]	13.7004
Daam2	dishevelled associated activator of morphogenesis 2 [Source:MGI Symbol;Acc:MGI:1923691]	13.6234
Sox11	SRY-box containing gene 11 [Source:MGI Symbol;Acc:MGI:98359]	12.9376
Zfp945	zinc finger protein 945 [Source:MGI Symbol;Acc:MGI:2445132]	12.899
Diras2	DIRAS family, GTP-binding RAS-like 2 [Source:MGI Symbol;Acc:MGI:1915453]	12.7536
Tgfb3	tubulin tyrosine ligase-like family, member 5 [Source:MGI Symbol;Acc:MGI:2443657]	12.5758
Sepp1	selenoprotein P, plasma, 1 [Source:MGI Symbol;Acc:MGI:894288]	12.5423
Fst	follistatin [Source:MGI Symbol;Acc:MGI:95586]	12.2211
Rragd	Ras-related GTP binding D [Source:MGI Symbol;Acc:MGI:1098604]	11.9883
Pdgfd	platelet-derived growth factor, D polypeptide [Source:MGI Symbol;Acc:MGI:1919035]	11.8544
Lrp2	low density lipoprotein receptor-related protein 2 [Source:MGI Symbol;Acc:MGI:95794]	11.6304
Uchl1	predicted gene, 16832 [Source:MGI Symbol;Acc:MGI:4439756]	11.3633
Tagln	proprotein convertase subtilisin/kexin type 7 [Source:MGI Symbol;Acc:MGI:107421]	11.3541
Gm2381	predicted gene 2381 [Source:MGI Symbol;Acc:MGI:3780549]	11.1831
Xlr3b	X-linked lymphocyte-regulated 5A [Source:MGI Symbol;Acc:MGI:3574108]	11.0792
Hoxa3	predicted gene 20653 [Source:MGI Symbol;Acc:MGI:5313100]	11.0153
Pla2g4a	phospholipase A2, group IVA (cytosolic, calcium-dependent) [Source:MGI Symbol;Acc:MGI:1195256]	11.0142
Smpd3	protein arginine N-methyltransferase 7 [Source:MGI Symbol;Acc:MGI:2384879]	10.672
Rpl10l	ribosomal protein L10-like [Source:MGI Symbol;Acc:MGI:3647985]	10.6228
Hey1	hairy/enhancer-of-split related with YRPW motif 1 [Source:MGI Symbol;Acc:MGI:1341800]	10.2618
Sost	sclerostin [Source:MGI Symbol;Acc:MGI:1921749]	9.76023
Nptx1	neuronal pentraxin 1 [Source:MGI Symbol;Acc:MGI:107811]	9.52791
Rgs2	regulator of G-protein signaling 2 [Source:MGI Symbol;Acc:MGI:1098271]	8.99382
Dclk2	doublecortin-like kinase 2 [Source:MGI Symbol;Acc:MGI:1918012]	8.59421
Gm15286	predicted gene 15286 [Source:MGI Symbol;Acc:MGI:3705204]	8.5161
Mlana	melan-A [Source:MGI Symbol;Acc:MGI:108454]	8.31791
Dclk1	doublecortin-like kinase 1 [Source:MGI Symbol;Acc:MGI:1330861]	8.18507
Airn	insulin-like growth factor 2 receptor [Source:MGI Symbol;Acc:MGI:96435]	8.15189
Aim2	cell adhesion molecule 3 [Source:MGI Symbol;Acc:MGI:2137858]	7.49951
Kcnk13	potassium channel, subfamily K, member 13 [Source:MGI Symbol;Acc:MGI:2384976]	7.47133
Nfib	nuclear factor I/B [Source:MGI Symbol;Acc:MGI:103188]	7.39391
Fam131a	family with sequence similarity 131, member A [Source:MGI Symbol;Acc:MGI:1925658]	7.04381
Cd74	CD74 antigen (invariant polypeptide of major histocompatibility complex, class II antigen-associated) [Source:MGI Symbol;Acc:MGI:96534]	7.04189
Gpr68	RIKEN cDNA 9030617O03 gene [Source:MGI Symbol;Acc:MGI:2444813]	6.79994
Mrc2	mannose receptor, C type 2 [Source:MGI Symbol;Acc:MGI:107818]	6.69527
Cabp7	zinc finger, matrin type 5 [Source:MGI Symbol;Acc:MGI:1914428]	6.5656
Igfbp2	insulin-like growth factor binding protein 2 [Source:MGI Symbol;Acc:MGI:96437]	6.24394
Kcnq5	potassium voltage-gated channel, subfamily Q, member 5 [Source:MGI Symbol;Acc:MGI:1924937]	6.14671
Rab32	RAB32, member RAS oncogene family [Source:MGI Symbol;Acc:MGI:1915094]	5.9918
Mfap3l	microfibrillar-associated protein 3-like [Source:MGI Symbol;Acc:MGI:1918556]	5.98541
Fbn2	fibrillin 2 [Source:MGI Symbol;Acc:MGI:95490]	5.9846
Kalrn	kalirin, RhoGEF kinase [Source:MGI Symbol;Acc:MGI:2685385]	5.91258
Rnf165	ring finger protein 165 [Source:MGI Symbol;Acc:MGI:2444521]	5.83287
Cdh2	cadherin 2 [Source:MGI Symbol;Acc:MGI:88355]	5.71146
Lpl	lipoprotein lipase [Source:MGI Symbol;Acc:MGI:96820]	5.54156
Galnt14	No description	5.48722
Pgam2	phosphoglycerate mutase 2 [Source:MGI Symbol;Acc:MGI:1933118]	5.48082
Ttpa	tocopherol (alpha) transfer protein [Source:MGI Symbol;Acc:MGI:1354168]	5.47151
Rab3b	RAB3B, member RAS oncogene family [Source:MGI Symbol;Acc:MGI:1917158]	5.43525
Vcan	versican [Source:MGI Symbol;Acc:MGI:102889]	5.39359
Xylt1	xylosyltransferase 1 [Source:MGI Symbol;Acc:MGI:2451073]	5.27414
Igdcc4	immunoglobulin superfamily, DCC subclass, member 4 [Source:MGI Symbol;Acc:MGI:1858497]	5.25892
Chrd	thrombopoietin [Source:MGI Symbol;Acc:MGI:101875]	5.25883
Tcf15	transcription factor 15 [Source:MGI Symbol;Acc:MGI:104664]	5.18724
Armcx4	armadillo repeat containing, X-linked 4 [Source:MGI Symbol;Acc:MGI:2147887]	5.09821
Adora1	myosin binding protein H [Source:MGI Symbol;Acc:MGI:1858196]	5.0695
Fam84b	family with sequence similarity 84, member B [Source:MGI Symbol;Acc:MGI:3026924]	5.04486
Atp2b4	ATPase, Ca++ transporting, plasma membrane 4 [Source:MGI Symbol;Acc:MGI:88111]	4.98804
Rnd3	Rho family GTPase 3 [Source:MGI Symbol;Acc:MGI:1921444]	4.947
Bmp6	bone morphogenetic protein 6 [Source:MGI Symbol;Acc:MGI:88182]	4.91697
Dab1	disabled homolog 1 (Drosophila) [Source:MGI Symbol;Acc:MGI:108554]	4.91259
Cdh4	cadherin 4 [Source:MGI Symbol;Acc:MGI:99218]	4.91123
Setbp1	SET binding protein 1 [Source:MGI Symbol;Acc:MGI:1933199]	4.89673
2610305D13Rik	RIKEN cDNA 2610305D13 gene [Source:MGI Symbol;Acc:MGI:2148252]	4.84026
Tubb4a	tubulin, beta 4A class IVA [Source:MGI Symbol;Acc:MGI:107848]	4.80791
Vgf	VGF nerve growth factor inducible [Source:MGI Symbol;Acc:MGI:1343180]	4.7499
St8sia4	ST8 alpha-N-acetyl-neuraminide alpha-2,8-sialyltransferase 4 [Source:MGI Symbol;Acc:MGI:106018]	4.72538
Serpinb1a	serine (or cysteine) peptidase inhibitor, clade B, member 1a [Source:MGI Symbol;Acc:MGI:1913472]	4.71523
Hs6st2	heparan sulfate 6-O-sulfotransferase 2 [Source:MGI Symbol;Acc:MGI:1354959]	4.70484
Adamts15	a disintegrin-like and metallopeptidase (reprolysin type) with thrombospondin type 1 motif, 15 [Source:MGI Symbol;Acc:MGI:2449569]	4.69597
Cdh23	cadherin 23 (otocadherin) [Source:MGI Symbol;Acc:MGI:1890219]	4.62803
Gulp1	GULP, engulfment adaptor PTB domain containing 1 [Source:MGI Symbol;Acc:MGI:1920407]	4.60399
Limch1	LIM and calponin homology domains 1 [Source:MGI Symbol;Acc:MGI:1924819]	4.59511
Wnt3	wingless-related MMTV integration site 3 [Source:MGI Symbol;Acc:MGI:98955]	4.58592
Nxph4	neurexophilin 4 [Source:MGI Symbol;Acc:MGI:1336197]	4.57571
Pgbd5	piggyBac transposable element derived 5 [Source:MGI Symbol;Acc:MGI:2429955]	4.51234
Cysltr1	cysteinyl leukotriene receptor 1 [Source:MGI Symbol;Acc:MGI:1926218]	4.42737
Lbh	limb-bud and heart [Source:MGI Symbol;Acc:MGI:1925139]	4.37246
Kit	kit oncogene [Source:MGI Symbol;Acc:MGI:96677]	4.32395
Prex2	No description	4.31652
Slc40a1	solute carrier family 40 (iron-regulated transporter), member 1 [Source:MGI Symbol;Acc:MGI:1315204]	4.27475
Bcl11b	B cell leukemia/lymphoma 11B [Source:MGI Symbol;Acc:MGI:1929913]	4.25328
Ptprj	protein tyrosine phosphatase, receptor type, J [Source:MGI Symbol;Acc:MGI:104574]	4.25263
Snx24	sorting nexing 24 [Source:MGI Symbol;Acc:MGI:1916476]	4.1728
Atp1a3	ATPase, Na+/K+ transporting, alpha 3 polypeptide [Source:MGI Symbol;Acc:MGI:88107]	4.17111
Thpo	thrombopoietin [Source:MGI Symbol;Acc:MGI:101875]	4.0909
Slc1a3	solute carrier family 1 (glial high affinity glutamate transporter), member 3 [Source:MGI Symbol;Acc:MGI:99917]	4.05515
Baiap3	BAI1-associated protein 3 [Source:MGI Symbol;Acc:MGI:2685783]	4.01068
Matn2	matrilin 2 [Source:MGI Symbol;Acc:MGI:109613]	3.93169
Mbnl1	muscleblind-like 1 (Drosophila) [Source:MGI Symbol;Acc:MGI:1928482]	3.92853
Ddah2	dimethylarginine dimethylaminohydrolase 2 [Source:MGI Symbol;Acc:MGI:1859016]	3.87663
Rab27a	RAB27A, member RAS oncogene family [Source:MGI Symbol;Acc:MGI:1861441]	3.85377
Jmjd8	jumonji domain containing 8 [Source:MGI Symbol;Acc:MGI:1919356]	3.79665
Il20rb	interleukin 20 receptor beta [Source:MGI Symbol;Acc:MGI:2143266]	3.79364
Ssh2	slingshot homolog 2 (Drosophila) [Source:MGI Symbol;Acc:MGI:2679255]	3.779
Fam124a	family with sequence similarity 124, member A [Source:MGI Symbol;Acc:MGI:3645930]	3.76468
Leprel1	predicted gene 4524 [Source:MGI Symbol;Acc:MGI:3782709]	3.74013
Aebp1	AE binding protein 1 [Source:MGI Symbol;Acc:MGI:1197012]	3.73407
Pabpc4l	poly(A) binding protein, cytoplasmic 4-like [Source:MGI Symbol;Acc:MGI:3643087]	3.69764
Cacna1h	tryptase gamma 1 [Source:MGI Symbol;Acc:MGI:1349391]	3.69603
Trp53i11	transformation related protein 53 inducible protein 11 [Source:MGI Symbol;Acc:MGI:2670995]	3.68753
Lrrc4	staphylococcal nuclease and tudor domain containing 1 [Source:MGI Symbol;Acc:MGI:1929266]	3.6758
Spry1	sprouty homolog 1 (Drosophila) [Source:MGI Symbol;Acc:MGI:1345139]	3.67207
Tpd52l1	tumor protein D52-like 1 [Source:MGI Symbol;Acc:MGI:1298386]	3.64228
Pdlim4	PDZ and LIM domain 4 [Source:MGI Symbol;Acc:MGI:1353470]	3.63612
Fam69b	predicted gene 20532 [Source:MGI Symbol;Acc:MGI:5141997]	3.62631
Arhgef26	Rho guanine nucleotide exchange factor (GEF) 26 [Source:MGI Symbol;Acc:MGI:1918053]	3.5667
Sema3g	sema domain, immunoglobulin domain (Ig), short basic domain, secreted, (semaphorin) 3G [Source:MGI Symbol;Acc:MGI:3041242]	3.55131
Nradd	neurotrophin receptor associated death domain [Source:MGI Symbol;Acc:MGI:1914419]	3.54295
Lrrn4	leucine rich repeat neuronal 4 [Source:MGI Symbol;Acc:MGI:2445154]	3.52998
Rtn4rl1	reticulon 4 receptor-like 1 [Source:MGI Symbol;Acc:MGI:2661375]	3.5234
Syt13	synaptotagmin XIII [Source:MGI Symbol;Acc:MGI:1933945]	3.52066
Trib2	tribbles homolog 2 (Drosophila) [Source:MGI Symbol;Acc:MGI:2145021]	3.49668
Tmem181c-ps	transmembrane protein 181C, pseudogene [Source:MGI Symbol;Acc:MGI:3780993]	3.47438
Dpysl3	dihydropyrimidinase-like 3 [Source:MGI Symbol;Acc:MGI:1349762]	3.46839
Nmb	neuromedin B [Source:MGI Symbol;Acc:MGI:1915289]	3.43675
T	brachyury [Source:MGI Symbol;Acc:MGI:98472]	3.41872
Aff3	AF4/FMR2 family, member 3 [Source:MGI Symbol;Acc:MGI:106927]	3.40949
Fmnl2	formin-like 2 [Source:MGI Symbol;Acc:MGI:1918659]	3.35138
Trim36	tripartite motif-containing 36 [Source:MGI Symbol;Acc:MGI:106264]	3.30403
Slco3a1	solute carrier organic anion transporter family, member 3a1 [Source:MGI Symbol;Acc:MGI:1351867]	3.28151
Sox13	SRY-box containing gene 13 [Source:MGI Symbol;Acc:MGI:98361]	3.2709
Dnd1	WD repeat domain 55 [Source:MGI Symbol;Acc:MGI:1915186]	3.25087
Lama1	laminin, alpha 1 [Source:MGI Symbol;Acc:MGI:99892]	3.21525
Ghr	growth hormone receptor [Source:MGI Symbol;Acc:MGI:95708]	3.20351
Fam49a	family with sequence similarity 49, member A [Source:MGI Symbol;Acc:MGI:1261783]	3.19927
Fjx1	four jointed box 1 (Drosophila) [Source:MGI Symbol;Acc:MGI:1341907]	3.11197
Kcns1	K+ voltage-gated channel, subfamily S, 1 [Source:MGI Symbol;Acc:MGI:1197019]	3.08877
Sardh	sarcosine dehydrogenase [Source:MGI Symbol;Acc:MGI:2183102]	3.08782
Epb4.1l4a	erythrocyte protein band 4.1-like 4a [Source:MGI Symbol;Acc:MGI:103007]	3.05654
Mum1l1	melanoma associated antigen (mutated) 1-like 1 [Source:MGI Symbol;Acc:MGI:2445062]	3.03478
A3galt2	alpha 1,3-galactosyltransferase 2 (isoglobotriaosylceramide synthase) [Source:MGI Symbol;Acc:MGI:2685279]	3.0283
Coro2b	coronin, actin binding protein, 2B [Source:MGI Symbol;Acc:MGI:2444283]	3.01149
Eci1	enoyl-Coenzyme A delta isomerase 1 [Source:MGI Symbol;Acc:MGI:94871]	3.00681
Twist1	twist homolog 1 (Drosophila) [Source:MGI Symbol;Acc:MGI:98872]	2.99772
Adamts8	a disintegrin-like and metallopeptidase (reprolysin type) with thrombospondin type 1 motif, 8 [Source:MGI Symbol;Acc:MGI:1353468]	2.9974
Elmo1	engulfment and cell motility 1, ced-12 homolog (C. elegans) [Source:MGI Symbol;Acc:MGI:2153044]	2.9786
Dcaf12l2	DDB1 and CUL4 associated factor 12-like 2 [Source:MGI Symbol;Acc:MGI:2445178]	2.97607
Kctd14	potassium channel tetramerisation domain containing 14 [Source:MGI Symbol;Acc:MGI:1289222]	2.9742
Myl6b	myosin, light polypeptide 6B [Source:MGI Symbol;Acc:MGI:1917789]	2.93928
Cyba	predicted gene 20388 [Source:MGI Symbol;Acc:MGI:5141853]	2.92489
B3galnt1	UDP-GalNAc:betaGlcNAc beta 1,3-galactosaminyltransferase, polypeptide 1 [Source:MGI Symbol;Acc:MGI:1349405]	2.91875
Col6a2	collagen, type VI, alpha 2 [Source:MGI Symbol;Acc:MGI:88460]	2.91755
Bex4	brain expressed gene 4 [Source:MGI Symbol;Acc:MGI:3606746]	2.91551
Dbn1	drebrin 1 [Source:MGI Symbol;Acc:MGI:1931838]	2.89918
Mtss1	metastasis suppressor 1 [Source:MGI Symbol;Acc:MGI:2384818]	2.89708
Cc2d2a	coiled-coil and C2 domain containing 2A [Source:MGI Symbol;Acc:MGI:1924487]	2.88178
Wnt5b	wingless-related MMTV integration site 5B [Source:MGI Symbol;Acc:MGI:98959]	2.87554
Tmem8	transmembrane protein 8 (five membrane-spanning domains) [Source:MGI Symbol;Acc:MGI:1926283]	2.82977
Gdf11	growth differentiation factor 11 [Source:MGI Symbol;Acc:MGI:1338027]	2.8235
Gpc4	glypican 4 [Source:MGI Symbol;Acc:MGI:104902]	2.77351
Akap5	A kinase (PRKA) anchor protein 5 [Source:MGI Symbol;Acc:MGI:2685104]	2.7727
Etv6	ets variant gene 6 (TEL oncogene) [Source:MGI Symbol;Acc:MGI:109336]	2.76614
Mex3a	mex3 homolog A (C. elegans) [Source:MGI Symbol;Acc:MGI:1919890]	2.72743
Bambi	BMP and activin membrane-bound inhibitor, homolog (Xenopus laevis) [Source:MGI Symbol;Acc:MGI:1915260]	2.72548
Rasgrp2	RAS, guanyl releasing protein 2 [Source:MGI Symbol;Acc:MGI:1333849]	2.70494
Tcea3	transcription elongation factor A (SII), 3 [Source:MGI Symbol;Acc:MGI:1196908]	2.68936
Plxna2	plexin A2 [Source:MGI Symbol;Acc:MGI:107684]	2.6722
Lrrc49	leucine rich repeat containing 49 [Source:MGI Symbol;Acc:MGI:2442689]	2.67082
Mdk	cholinergic receptor, muscarinic 4 [Source:MGI Symbol;Acc:MGI:88399]	2.63872
Igfbp3	insulin-like growth factor binding protein 3 [Source:MGI Symbol;Acc:MGI:96438]	2.62473
Chrna4	cholinergic receptor, nicotinic, alpha polypeptide 4 [Source:MGI Symbol;Acc:MGI:87888]	2.62083
Tlr2	toll-like receptor 2 [Source:MGI Symbol;Acc:MGI:1346060]	2.58464
Nr0b1	nuclear receptor subfamily 0, group B, member 1 [Source:MGI Symbol;Acc:MGI:1352460]	2.58031
Mpped2	metallophosphoesterase domain containing 2 [Source:MGI Symbol;Acc:MGI:1924265]	2.56753
Gprasp1	armadillo repeat containing, X-linked 5 [Source:MGI Symbol;Acc:MGI:2148026]	2.56046
Gprc5b	IQ motif containing K [Source:MGI Symbol;Acc:MGI:3612188]	2.56039
Zswim6	zinc finger, SWIM domain containing 6 [Source:MGI Symbol;Acc:MGI:1914513]	2.55346
Popdc3	popeye domain containing 3 [Source:MGI Symbol;Acc:MGI:1930153]	2.53701
Gm98	predicted gene 98 [Source:MGI Symbol;Acc:MGI:2684944]	2.53249
Mapk4	mitogen-activated protein kinase 4 [Source:MGI Symbol;Acc:MGI:2444559]	2.52235
Nkd2	naked cuticle 2 homolog (Drosophila) [Source:MGI Symbol;Acc:MGI:1919543]	2.50052
Ltbp1	latent transforming growth factor beta binding protein 1 [Source:MGI Symbol;Acc:MGI:109151]	2.47708
Serpine2	serine (or cysteine) peptidase inhibitor, clade E, member 2 [Source:MGI Symbol;Acc:MGI:101780]	2.41883
Stau2	staufen (RNA binding protein) homolog 2 (Drosophila) [Source:MGI Symbol;Acc:MGI:1352508]	2.40468
Dpysl2	dihydropyrimidinase-like 2 [Source:MGI Symbol;Acc:MGI:1349763]	2.39861
Ncs1	neuronal calcium sensor 1 [Source:MGI Symbol;Acc:MGI:109166]	2.39108
Zfp566	zinc finger protein 566 [Source:MGI Symbol;Acc:MGI:1919806]	2.36521
Chst2	carbohydrate sulfotransferase 2 [Source:MGI Symbol;Acc:MGI:1891160]	2.35368
Calca	calcitonin/calcitonin-related polypeptide, alpha [Source:MGI Symbol;Acc:MGI:2151253]	2.35242
Cacna1c	calcium channel, voltage-dependent, L type, alpha 1C subunit [Source:MGI Symbol;Acc:MGI:103013]	2.35078
Msi2	Musashi homolog 2 (Drosophila) [Source:MGI Symbol;Acc:MGI:1923876]	2.34021
Uck2	uridine-cytidine kinase 2 [Source:MGI Symbol;Acc:MGI:1931744]	2.32916
Abcc8	ATP-binding cassette, sub-family C (CFTR/MRP), member 8 [Source:MGI Symbol;Acc:MGI:1352629]	2.3235
Dcaf12l1	DDB1 and CUL4 associated factor 12-like 1 [Source:MGI Symbol;Acc:MGI:2444462]	2.31929
Dnmt3a	DNA methyltransferase 3A [Source:MGI Symbol;Acc:MGI:1261827]	2.3098
Ust	uronyl-2-sulfotransferase [Source:MGI Symbol;Acc:MGI:2442406]	2.2576
Fscn1	fascin homolog 1, actin bundling protein (Strongylocentrotus purpuratus) [Source:MGI Symbol;Acc:MGI:1352745]	2.24624
Bag2	BCL2-associated athanogene 2 [Source:MGI Symbol;Acc:MGI:1891254]	2.24082
Sertad4	SERTA domain containing 4 [Source:MGI Symbol;Acc:MGI:2443496]	2.22599
D430041D05Rik	RIKEN cDNA D430041D05 gene [Source:MGI Symbol;Acc:MGI:2181743]	2.22323
Tnik	TRAF2 and NCK interacting kinase [Source:MGI Symbol;Acc:MGI:1916264]	2.22164
Syngr3	synaptogyrin 3 [Source:MGI Symbol;Acc:MGI:1341881]	2.21303
Fam59b	RIKEN cDNA 3110082J24 gene [Source:MGI Symbol;Acc:MGI:3641994]	2.20975
Sorcs2	sortilin-related VPS10 domain containing receptor 2 [Source:MGI Symbol;Acc:MGI:1932289]	2.20513
Spred1	sprouty protein with EVH-1 domain 1, related sequence [Source:MGI Symbol;Acc:MGI:2150016]	2.18795
Fchsd2	FCH and double SH3 domains 2 [Source:MGI Symbol;Acc:MGI:2448475]	2.1862
Dtx4	deltex 4 homolog (Drosophila) [Source:MGI Symbol;Acc:MGI:2672905]	2.18569
Sdc3	syndecan 3 [Source:MGI Symbol;Acc:MGI:1349163]	2.16887
Stox2	storkhead box 2 [Source:MGI Symbol;Acc:MGI:1918319]	2.15312
Amph	amphiphysin [Source:MGI Symbol;Acc:MGI:103574]	2.15054
Ldlrad3	low density lipoprotein receptor class A domain containing 3 [Source:MGI Symbol;Acc:MGI:2138856]	2.15012
Syt11	synaptotagmin XI [Source:MGI Symbol;Acc:MGI:1859547]	2.14016
Chac2	ankyrin repeat and SOCS box-containing 3 [Source:MGI Symbol;Acc:MGI:1929749]	2.12344
Zfp27	zinc finger protein 27 [Source:MGI Symbol;Acc:MGI:99174]	2.12312
Laptm4b	lysosomal-associated protein transmembrane 4B [Source:MGI Symbol;Acc:MGI:1890494]	2.12031
Atat1	predicted gene 16279 [Source:MGI Symbol;Acc:MGI:3826576]	2.11048
Tpbg	RIKEN cDNA 9330154J02 gene [Source:MGI Symbol;Acc:MGI:3045244]	2.10889
Wasf1	WAS protein family, member 1 [Source:MGI Symbol;Acc:MGI:1890563]	2.09028
Pgap1	post-GPI attachment to proteins 1 [Source:MGI Symbol;Acc:MGI:2443342]	2.08218
Myo1b	myosin IB [Source:MGI Symbol;Acc:MGI:107752]	2.07652
Arhgap28	Rho GTPase activating protein 28 [Source:MGI Symbol;Acc:MGI:2147003]	2.07253
Zfp428	zinc finger protein 428 [Source:MGI Symbol;Acc:MGI:1916463]	2.0622
Prpsap2	phosphoribosyl pyrophosphate synthetase-associated protein 2 [Source:MGI Symbol;Acc:MGI:2384838]	2.06079
Fam53b	fibroblast growth factor receptor 2 [Source:MGI Symbol;Acc:MGI:95523]	2.0462
Arxes2	adipocyte-related X-chromosome expressed sequence 2 [Source:MGI Symbol;Acc:MGI:1924226]	2.03439
Cenpm	centromere protein M [Source:MGI Symbol;Acc:MGI:1913820]	0.50842
Zfp28	zinc finger protein 28 [Source:MGI Symbol;Acc:MGI:99175]	0.508337
Hectd3	HECT domain containing 3 [Source:MGI Symbol;Acc:MGI:1923858]	0.508247
Rhou	predicted gene 20388 [Source:MGI Symbol;Acc:MGI:5141853]	0.508218
Tmem175	transmembrane protein 175 [Source:MGI Symbol;Acc:MGI:1919642]	0.507525
Mical1	microtubule associated monoxygenase, calponin and LIM domain containing 1 [Source:MGI Symbol;Acc:MGI:2385847]	0.505954
Arap2	ArfGAP with RhoGAP domain, ankyrin repeat and PH domain 2 [Source:MGI Symbol;Acc:MGI:2684416]	0.505936
39692	septin 8 [Source:MGI Symbol;Acc:MGI:894310]	0.505206
Kif16b	kinesin family member 16B [Source:MGI Symbol;Acc:MGI:1098240]	0.505125
Cdh1	cadherin 1 [Source:MGI Symbol;Acc:MGI:88354]	0.504811
Acvr1b	activin A receptor, type 1B [Source:MGI Symbol;Acc:MGI:1338944]	0.504737
Ddb2	acid phosphatase 2, lysosomal [Source:MGI Symbol;Acc:MGI:87882]	0.504396
Zfp362	zinc finger protein 362 [Source:MGI Symbol;Acc:MGI:2652839]	0.504073
Mtmr1	myotubularin related protein 1 [Source:MGI Symbol;Acc:MGI:1858271]	0.503771
Ezh1	enhancer of zeste homolog 1 (Drosophila) [Source:MGI Symbol;Acc:MGI:1097695]	0.503269
Hmgcl	3-hydroxy-3-methylglutaryl-Coenzyme A lyase [Source:MGI Symbol;Acc:MGI:96158]	0.500921
Fam126a	family with sequence similarity 126, member A [Source:MGI Symbol;Acc:MGI:2149839]	0.500026
Tmem120a	transmembrane protein 120A [Source:MGI Symbol;Acc:MGI:2686991]	0.498738
Ggta1	glycoprotein galactosyltransferase alpha 1, 3 [Source:MGI Symbol;Acc:MGI:95704]	0.498584
Zfp839	zinc finger protein 839 [Source:MGI Symbol;Acc:MGI:1920055]	0.498547
Rassf8	Ras association (RalGDS/AF-6) domain family (N-terminal) member 8 [Source:MGI Symbol;Acc:MGI:1918573]	0.498517
Cep290	centrosomal protein 290 [Source:MGI Symbol;Acc:MGI:2384917]	0.497251
Pxk	PX domain containing serine/threonine kinase [Source:MGI Symbol;Acc:MGI:1289230]	0.496803
Limk2	LIM motif-containing protein kinase 2 [Source:MGI Symbol;Acc:MGI:1197517]	0.496712
Hmg20b	high mobility group 20 B [Source:MGI Symbol;Acc:MGI:1341190]	0.49664
Bbx	bobby sox homolog (Drosophila) [Source:MGI Symbol;Acc:MGI:1917758]	0.496596
Tradd	TNFRSF1A-associated via death domain [Source:MGI Symbol;Acc:MGI:109200]	0.495289
Myh9	myosin, heavy polypeptide 9, non-muscle [Source:MGI Symbol;Acc:MGI:107717]	0.495199
Ncoa1	nuclear receptor coactivator 1 [Source:MGI Symbol;Acc:MGI:1276523]	0.495145
Dok1	docking protein 1 [Source:MGI Symbol;Acc:MGI:893587]	0.490811
Acpl2	acid phosphatase-like 2 [Source:MGI Symbol;Acc:MGI:2442444]	0.489143
Cltb	clathrin, light polypeptide (Lcb) [Source:MGI Symbol;Acc:MGI:1921575]	0.48819
Kdm1b	thiopurine methyltransferase [Source:MGI Symbol;Acc:MGI:98812]	0.487904
Exoc6b	exocyst complex component 6B [Source:MGI Symbol;Acc:MGI:1923164]	0.486762
Synj1	synaptojanin 1 [Source:MGI Symbol;Acc:MGI:1354961]	0.486283
Plbd2	serine dehydratase [Source:MGI Symbol;Acc:MGI:98270]	0.485176
Tgfb1	transforming growth factor, beta 1 [Source:MGI Symbol;Acc:MGI:98725]	0.485152
Eif2ak3	eukaryotic translation initiation factor 2 alpha kinase 3 [Source:MGI Symbol;Acc:MGI:1341830]	0.484772
Plekho2	pleckstrin homology domain containing, family O member 2 [Source:MGI Symbol;Acc:MGI:2143132]	0.484722
Tmed8	transmembrane emp24 domain containing 8 [Source:MGI Symbol;Acc:MGI:1923480]	0.4847
Tmc6	transmembrane channel-like gene family 6 [Source:MGI Symbol;Acc:MGI:1098686]	0.484114
Errfi1	RIKEN cDNA 1700045H11 gene [Source:MGI Symbol;Acc:MGI:1920598]	0.483663
Slc4a11	solute carrier family 4, sodium bicarbonate transporter-like, member 11 [Source:MGI Symbol;Acc:MGI:2138987]	0.482773
Slc27a1	solute carrier family 27 (fatty acid transporter), member 1 [Source:MGI Symbol;Acc:MGI:1347098]	0.482222
Zyx	zyxin [Source:MGI Symbol;Acc:MGI:103072]	0.481951
Fam83h	family with sequence similarity 83, member H [Source:MGI Symbol;Acc:MGI:2145900]	0.48144
Gstm4	glutathione S-transferase, mu 4 [Source:MGI Symbol;Acc:MGI:95862]	0.480436
Aes	amino-terminal enhancer of split [Source:MGI Symbol;Acc:MGI:95806]	0.480157
Got1l1	glutamic-oxaloacetic transaminase 1-like 1 [Source:MGI Symbol;Acc:MGI:1923865]	0.477342
Dap	death-associated protein [Source:MGI Symbol;Acc:MGI:1918190]	0.476921
Myst4	MYST histone acetyltransferase monocytic leukemia 4 [Source:MGI Symbol;Acc:MGI:1858746]	0.476851
Rpia	ribose 5-phosphate isomerase A [Source:MGI Symbol;Acc:MGI:103254]	0.476636
Ankrd24	ankyrin repeat domain 24 [Source:MGI Symbol;Acc:MGI:1890394]	0.476387
Zfyve9	zinc finger, FYVE domain containing 9 [Source:MGI Symbol;Acc:MGI:2652838]	0.475789
Fam63a	prune homolog (Drosophila) [Source:MGI Symbol;Acc:MGI:1925152]	0.47576
Tecpr1	tectonin beta-propeller repeat containing 1 [Source:MGI Symbol;Acc:MGI:1917631]	0.474573
A830010M20Rik	RIKEN cDNA A830010M20 gene [Source:MGI Symbol;Acc:MGI:2445097]	0.474389
Ldlrap1	low density lipoprotein receptor adaptor protein 1 [Source:MGI Symbol;Acc:MGI:2140175]	0.473797
Gpr161	G protein-coupled receptor 161 [Source:MGI Symbol;Acc:MGI:2685054]	0.473178
Krcc1	SET and MYND domain containing 1 [Source:MGI Symbol;Acc:MGI:104790]	0.47287
Wbscr27	Williams Beuren syndrome chromosome region 27 (human) [Source:MGI Symbol;Acc:MGI:1933146]	0.472591
Sigirr	single immunoglobulin and toll-interleukin 1 receptor (TIR) domain [Source:MGI Symbol;Acc:MGI:1344402]	0.472482
Lactb	lactamase, beta [Source:MGI Symbol;Acc:MGI:1933395]	0.472412
Pdp2	pyruvate dehyrogenase phosphatase catalytic subunit 2 [Source:MGI Symbol;Acc:MGI:1918878]	0.472394
Intu	inturned planar cell polarity effector homolog (Drosophila) [Source:MGI Symbol;Acc:MGI:2443752]	0.472118
Cth	cystathionase (cystathionine gamma-lyase) [Source:MGI Symbol;Acc:MGI:1339968]	0.472056
Anxa11	annexin A11 [Source:MGI Symbol;Acc:MGI:108481]	0.469723
Pycr1	pyrroline-5-carboxylate reductase 1 [Source:MGI Symbol;Acc:MGI:2384795]	0.468892
Slc37a1	solute carrier family 37 (glycerol-3-phosphate transporter), member 1 [Source:MGI Symbol;Acc:MGI:2446181]	0.468154
Btg2	B cell translocation gene 2, anti-proliferative [Source:MGI Symbol;Acc:MGI:108384]	0.46616
5430411K18Rik	RIKEN cDNA 5430411K18 gene [Source:MGI Symbol;Acc:MGI:1918673]	0.466127
BC023829	cDNA sequence BC023829 [Source:MGI Symbol;Acc:MGI:2448555]	0.466012
Hebp1	heme binding protein 1 [Source:MGI Symbol;Acc:MGI:1333880]	0.4658
Il17ra	interleukin 17 receptor A [Source:MGI Symbol;Acc:MGI:107399]	0.465495
B4galnt1	beta-1,4-N-acetyl-galactosaminyl transferase 1 [Source:MGI Symbol;Acc:MGI:1342057]	0.464856
Vill	villin-like [Source:MGI Symbol;Acc:MGI:1201781]	0.464758
Pde4dip	phosphodiesterase 4D interacting protein (myomegalin) [Source:MGI Symbol;Acc:MGI:1891434]	0.462854
Pcbp3	poly(rC) binding protein 3 [Source:MGI Symbol;Acc:MGI:1890470]	0.46277
Procr	protein C receptor, endothelial [Source:MGI Symbol;Acc:MGI:104596]	0.462427
Ift57	intraflagellar transport 57 homolog (Chlamydomonas) [Source:MGI Symbol;Acc:MGI:1921166]	0.462388
C430049B03Rik	RIKEN cDNA C430049B03 gene [Source:MGI Symbol;Acc:MGI:1924903]	0.461904
Rnf17	ring finger protein 17 [Source:MGI Symbol;Acc:MGI:1353419]	0.460931
Plekhh3	pleckstrin homology domain containing, family H (with MyTH4 domain) member 3 [Source:MGI Symbol;Acc:MGI:2384950]	0.460031
Heatr7a	HEAT repeat containing 7A [Source:MGI Symbol;Acc:MGI:2442558]	0.459863
Sesn1	sestrin 1 [Source:MGI Symbol;Acc:MGI:2155278]	0.458811
Zc3hav1	zinc finger CCCH type, antiviral 1 [Source:MGI Symbol;Acc:MGI:1926031]	0.458766
2004-09-01	predicted gene 11492 [Source:MGI Symbol;Acc:MGI:3651136]	0.456177
Amot	angiomotin [Source:MGI Symbol;Acc:MGI:108440]	0.455974
Anxa2	annexin A2 [Source:MGI Symbol;Acc:MGI:88246]	0.455249
Cib2	SH2 domain containing 7 [Source:MGI Symbol;Acc:MGI:2441692]	0.454449
Qdpr	quinoid dihydropteridine reductase [Source:MGI Symbol;Acc:MGI:97836]	0.45408
Fig4	FIG4 homolog (S. cerevisiae) [Source:MGI Symbol;Acc:MGI:2143585]	0.453819
Parp16	poly (ADP-ribose) polymerase family, member 16 [Source:MGI Symbol;Acc:MGI:2446133]	0.453134
Rtkn	rhotekin [Source:MGI Symbol;Acc:MGI:107371]	0.452648
Dsg2	desmoglein 2 [Source:MGI Symbol;Acc:MGI:1196466]	0.452573
Stk10	serine/threonine kinase 10 [Source:MGI Symbol;Acc:MGI:1099439]	0.451684
Bcar3	breast cancer anti-estrogen resistance 3 [Source:MGI Symbol;Acc:MGI:1352501]	0.451455
Cish	cytokine inducible SH2-containing protein [Source:MGI Symbol;Acc:MGI:103159]	0.451073
Cilp2	cartilage intermediate layer protein 2 [Source:MGI Symbol;Acc:MGI:1915959]	0.450673
Sun2	Sad1 and UNC84 domain containing 2 [Source:MGI Symbol;Acc:MGI:2443011]	0.450073
Spire2	predicted gene 20388 [Source:MGI Symbol;Acc:MGI:5141853]	0.450041
Acadl	acyl-Coenzyme A dehydrogenase, long-chain [Source:MGI Symbol;Acc:MGI:87866]	0.450003
Dnajc4	DnaJ (Hsp40) homolog, subfamily C, member 4 [Source:MGI Symbol;Acc:MGI:1927346]	0.449337
1810031K17Rik	RIKEN cDNA 1810031K17 gene [Source:MGI Symbol;Acc:MGI:1916421]	0.449179
Parva	parvin, alpha [Source:MGI Symbol;Acc:MGI:1931144]	0.448212
Tmem170b	transmembrane protein 170B [Source:MGI Symbol;Acc:MGI:3647046]	0.446533
Rps6ka4	ribosomal protein S6 kinase, polypeptide 4 [Source:MGI Symbol;Acc:MGI:1930076]	0.44481
Hapln4	hyaluronan and proteoglycan link protein 4 [Source:MGI Symbol;Acc:MGI:2679531]	0.444169
Tdrd7	tudor domain containing 7 [Source:MGI Symbol;Acc:MGI:2140279]	0.443893
Tnfaip8l1	tumor necrosis factor, alpha-induced protein 8-like 1 [Source:MGI Symbol;Acc:MGI:1913693]	0.44335
Tfeb	transcription factor EB [Source:MGI Symbol;Acc:MGI:103270]	0.443141
Gstp1	glutathione S-transferase, pi 1 [Source:MGI Symbol;Acc:MGI:95865]	0.442923
Lphn2	latrophilin 2 [Source:MGI Symbol;Acc:MGI:2139714]	0.442628
Zfp334	zinc finger protein 334 [Source:MGI Symbol;Acc:MGI:2388656]	0.442414
Nagk	N-acetylglucosamine kinase [Source:MGI Symbol;Acc:MGI:1860418]	0.442257
Inf2	inverted formin, FH2 and WH2 domain containing [Source:MGI Symbol;Acc:MGI:1917685]	0.440853
Cdc42bpg	CDC42 binding protein kinase gamma (DMPK-like) [Source:MGI Symbol;Acc:MGI:2652845]	0.440767
Ahi1	Abelson helper integration site 1 [Source:MGI Symbol;Acc:MGI:87971]	0.439726
Pon2	paraoxonase 2 [Source:MGI Symbol;Acc:MGI:106687]	0.439497
Npdc1	ectonucleoside triphosphate diphosphohydrolase 2 [Source:MGI Symbol;Acc:MGI:1096863]	0.439212
Adssl1	adenylosuccinate synthetase like 1 [Source:MGI Symbol;Acc:MGI:87947]	0.438678
Daglb	diacylglycerol lipase, beta [Source:MGI Symbol;Acc:MGI:2442032]	0.438512
Phldb2	pleckstrin homology-like domain, family B, member 2 [Source:MGI Symbol;Acc:MGI:2444981]	0.437102
Tcf4	transcription factor 4 [Source:MGI Symbol;Acc:MGI:98506]	0.436936
Wdr35	WD repeat domain 35 [Source:MGI Symbol;Acc:MGI:1921932]	0.436816
Neurl1b	neuralized homolog 1b (Drosophila) [Source:MGI Symbol;Acc:MGI:3643092]	0.436639
Baz1a	bromodomain adjacent to zinc finger domain 1A [Source:MGI Symbol;Acc:MGI:1309478]	0.435965
Efna1	ephrin A1 [Source:MGI Symbol;Acc:MGI:103236]	0.434551
Slc25a42	solute carrier family 25, member 42 [Source:MGI Symbol;Acc:MGI:1920345]	0.434262
Stat2	signal transducer and activator of transcription 2 [Source:MGI Symbol;Acc:MGI:103039]	0.433633
Tom1l2	target of myb1-like 2 (chicken) [Source:MGI Symbol;Acc:MGI:2443306]	0.4327
Crlf2	cytokine receptor-like factor 2 [Source:MGI Symbol;Acc:MGI:1889506]	0.432149
Ngly1	3-oxoacyl-ACP synthase, mitochondrial [Source:MGI Symbol;Acc:MGI:1918397]	0.431449
Cadm4	cell adhesion molecule 4 [Source:MGI Symbol;Acc:MGI:2449088]	0.431227
Abhd4	abhydrolase domain containing 4 [Source:MGI Symbol;Acc:MGI:1915938]	0.430473
Kdelc2	KDEL (Lys-Asp-Glu-Leu) containing 2 [Source:MGI Symbol;Acc:MGI:1923765]	0.430215
AI836003	expressed sequence AI836003 [Source:MGI Symbol;Acc:MGI:2146066]	0.429362
Myof	myoferlin [Source:MGI Symbol;Acc:MGI:1919192]	0.42935
Cgref1	cell growth regulator with EF hand domain 1 [Source:MGI Symbol;Acc:MGI:1915817]	0.428155
Trim62	tripartite motif-containing 62 [Source:MGI Symbol;Acc:MGI:1914775]	0.427184
Sema6b	sema domain, transmembrane domain (TM), and cytoplasmic domain, (semaphorin) 6B [Source:MGI Symbol;Acc:MGI:1202889]	0.426865
Nicn1	nicolin 1 [Source:MGI Symbol;Acc:MGI:1913507]	0.426354
Naga	N-acetyl galactosaminidase, alpha [Source:MGI Symbol;Acc:MGI:1261422]	0.425355
Efs	embryonal Fyn-associated substrate [Source:MGI Symbol;Acc:MGI:105311]	0.424424
Cdkl2	cyclin-dependent kinase-like 2 (CDC2-related kinase) [Source:MGI Symbol;Acc:MGI:1858227]	0.423369
Dhtkd1	predicted gene 13267 [Source:MGI Symbol;Acc:MGI:3652179]	0.422374
Myh7b	myosin, heavy chain 7B, cardiac muscle, beta [Source:MGI Symbol;Acc:MGI:3710243]	0.4221
Ppp3cc	protein phosphatase 3, catalytic subunit, gamma isoform [Source:MGI Symbol;Acc:MGI:107162]	0.422002
Podxl	podocalyxin-like [Source:MGI Symbol;Acc:MGI:1351317]	0.420252
Efhd2	EF hand domain containing 2 [Source:MGI Symbol;Acc:MGI:106504]	0.418277
Cenpk	centromere protein K [Source:MGI Symbol;Acc:MGI:1926210]	0.418079
Mapre3	microtubule-associated protein, RP/EB family, member 3 [Source:MGI Symbol;Acc:MGI:2140967]	0.41753
Agtpbp1	ATP/GTP binding protein 1 [Source:MGI Symbol;Acc:MGI:2159437]	0.417336
Ndrg1	N-myc downstream regulated gene 1 [Source:MGI Symbol;Acc:MGI:1341799]	0.41721
Slc38a9	solute carrier family 38, member 9 [Source:MGI Symbol;Acc:MGI:1918839]	0.416197
Fcho1	FCH domain only 1 [Source:MGI Symbol;Acc:MGI:1921265]	0.415316
Fbxl8	F-box and leucine-rich repeat protein 8 [Source:MGI Symbol;Acc:MGI:1354697]	0.414834
E2f2	E2F transcription factor 2 [Source:MGI Symbol;Acc:MGI:1096341]	0.413441
Dusp16	dual specificity phosphatase 16 [Source:MGI Symbol;Acc:MGI:1917936]	0.413241
Adc	arginine decarboxylase [Source:MGI Symbol;Acc:MGI:2442093]	0.413078
Tacc1	transforming, acidic coiled-coil containing protein 1 [Source:MGI Symbol;Acc:MGI:2443510]	0.412971
Ptrh1	peptidyl-tRNA hydrolase 1 homolog (S. cerevisiae) [Source:MGI Symbol;Acc:MGI:1913779]	0.412506
Lipg	lipase, endothelial [Source:MGI Symbol;Acc:MGI:1341803]	0.411042
Ccpg1	predicted gene 20510 [Source:MGI Symbol;Acc:MGI:5141975]	0.409781
Pou6f1	POU domain, class 6, transcription factor 1 [Source:MGI Symbol;Acc:MGI:102935]	0.408983
Marveld1	MARVEL (membrane-associating) domain containing 1 [Source:MGI Symbol;Acc:MGI:2147570]	0.408553
Ano8	DET1 and DDB1 associated 1 [Source:MGI Symbol;Acc:MGI:1913748]	0.408184
Gstm5	RIKEN cDNA 4933431E20 gene [Source:MGI Symbol;Acc:MGI:3584041]	0.407973
Itpr2	inositol 1,4,5-triphosphate receptor 2 [Source:MGI Symbol;Acc:MGI:99418]	0.405678
Dock11	dedicator of cytokinesis 11 [Source:MGI Symbol;Acc:MGI:1923224]	0.405367
Fos	FBJ osteosarcoma oncogene [Source:MGI Symbol;Acc:MGI:95574]	0.404419
Slc17a5	solute carrier family 17 (anion/sugar transporter), member 5 [Source:MGI Symbol;Acc:MGI:1924105]	0.404095
Stxbp5	syntaxin binding protein 5 (tomosyn) [Source:MGI Symbol;Acc:MGI:1926058]	0.403848
Gprc5a	G protein-coupled receptor, family C, group 5, member A [Source:MGI Symbol;Acc:MGI:1891250]	0.401316
Ppp1r13l	protein phosphatase 1, regulatory (inhibitor) subunit 13 like [Source:MGI Symbol;Acc:MGI:3525053]	0.400581
Bcor	BCL6 interacting corepressor [Source:MGI Symbol;Acc:MGI:1918708]	0.397861
Slc39a4	solute carrier family 39 (zinc transporter), member 4 [Source:MGI Symbol;Acc:MGI:1919277]	0.397374
BC018242	cDNA sequence BC018242 [Source:MGI Symbol;Acc:MGI:2384575]	0.397169
Gadd45g	growth arrest and DNA-damage-inducible 45 gamma [Source:MGI Symbol;Acc:MGI:1346325]	0.397146
Kif13b	kinesin family member 13B [Source:MGI Symbol;Acc:MGI:1098265]	0.395649
Otx1	orthodenticle homolog 1 (Drosophila) [Source:MGI Symbol;Acc:MGI:97450]	0.394547
4930447C04Rik	RIKEN cDNA 4930447C04 gene [Source:MGI Symbol;Acc:MGI:1923051]	0.394133
Tmc8	transmembrane channel-like gene family 6 [Source:MGI Symbol;Acc:MGI:1098686]	0.394005
Myo6	myosin VI [Source:MGI Symbol;Acc:MGI:104785]	0.393864
C2cd2l	C2 calcium-dependent domain containing 2-like [Source:MGI Symbol;Acc:MGI:1919014]	0.393721
4831426I19Rik	RIKEN cDNA 4831426I19 gene [Source:MGI Symbol;Acc:MGI:2442408]	0.392813
Dopey2	dopey family member 2 [Source:MGI Symbol;Acc:MGI:1917278]	0.392746
Ptprn	protein tyrosine phosphatase, receptor type, N [Source:MGI Symbol;Acc:MGI:102765]	0.391465
Lpin1	lipin 1 [Source:MGI Symbol;Acc:MGI:1891340]	0.389629
Endod1	endonuclease domain containing 1 [Source:MGI Symbol;Acc:MGI:1919196]	0.388913
Parp4	poly (ADP-ribose) polymerase family, member 4 [Source:MGI Symbol;Acc:MGI:2685589]	0.388579
Bbs9	Bardet-Biedl syndrome 9 (human) [Source:MGI Symbol;Acc:MGI:2442833]	0.388322
Heca	headcase homolog (Drosophila) [Source:MGI Symbol;Acc:MGI:2685715]	0.387743
Usp28	ubiquitin specific peptidase 28 [Source:MGI Symbol;Acc:MGI:2442293]	0.387239
Hacl1	collagen-like tail subunit (single strand of homotrimer) of asymmetric acetylcholinesterase [Source:MGI Symbol;Acc:MGI:1338761]	0.387232
Gm20510	dyslexia susceptibility 1 candidate 1 homolog (human) [Source:MGI Symbol;Acc:MGI:1914935]	0.3872
Mxi1	Max interacting protein 1 [Source:MGI Symbol;Acc:MGI:97245]	0.387119
Unc13b	unc-13 homolog B (C. elegans) [Source:MGI Symbol;Acc:MGI:1342278]	0.386955
2310067B10Rik	RIKEN cDNA 2310067B10 gene [Source:MGI Symbol;Acc:MGI:1919197]	0.386387
Slc30a4	solute carrier family 30 (zinc transporter), member 4 [Source:MGI Symbol;Acc:MGI:1345282]	0.385145
Lmo7	LIM domain only 7 [Source:MGI Symbol;Acc:MGI:1353586]	0.384823
Lipe	lipase, hormone sensitive [Source:MGI Symbol;Acc:MGI:96790]	0.384257
Lrrc4b	leucine rich repeat containing 4B [Source:MGI Symbol;Acc:MGI:3027390]	0.384117
Afap1l2	actin filament associated protein 1-like 2 [Source:MGI Symbol;Acc:MGI:2147658]	0.38403
N4bp2l1	NEDD4 binding protein 2-like 1 [Source:MGI Symbol;Acc:MGI:2140872]	0.383955
Atp2a3	ATPase, Ca++ transporting, ubiquitous [Source:MGI Symbol;Acc:MGI:1194503]	0.382811
Fbxo2	F-box protein 2 [Source:MGI Symbol;Acc:MGI:2446216]	0.382469
Kdelr3	KDEL (Lys-Asp-Glu-Leu) endoplasmic reticulum protein retention receptor 3 [Source:MGI Symbol;Acc:MGI:2145953]	0.381636
Palm3	paralemmin 3 [Source:MGI Symbol;Acc:MGI:1921587]	0.381464
Fstl3	follistatin-like 3 [Source:MGI Symbol;Acc:MGI:1890391]	0.380463
B230312A22Rik	RIKEN cDNA B230312A22 gene [Source:MGI Symbol;Acc:MGI:2441854]	0.378807
AC104834.1	putative fidgetin-like protein 2 [Source:RefSeq peptide;Acc:NP_001201840]	0.378433
Prkra	protein kinase, interferon inducible double stranded RNA dependent activator [Source:MGI Symbol;Acc:MGI:1344375]	0.377826
Zfp703	zinc finger protein 703 [Source:MGI Symbol;Acc:MGI:2662729]	0.377472
Runx1	runt related transcription factor 1 [Source:MGI Symbol;Acc:MGI:99852]	0.376567
Itga6	integrin alpha 6 [Source:MGI Symbol;Acc:MGI:96605]	0.376383
Rab11fip5	RAB11 family interacting protein 5 (class I) [Source:MGI Symbol;Acc:MGI:1098586]	0.375813
Nphp1	nephronophthisis 1 (juvenile) homolog (human) [Source:MGI Symbol;Acc:MGI:1858233]	0.375438
Klf9	Kruppel-like factor 9 [Source:MGI Symbol;Acc:MGI:1333856]	0.375145
Ccbl2	cysteine conjugate-beta lyase 2 [Source:MGI Symbol;Acc:MGI:2677849]	0.374007
Lamb2	laminin, beta 2 [Source:MGI Symbol;Acc:MGI:99916]	0.373925
2610034B18Rik	RIKEN cDNA 2610034B18 gene [Source:MGI Symbol;Acc:MGI:1917670]	0.373814
Dnaja4	DnaJ (Hsp40) homolog, subfamily A, member 4 [Source:MGI Symbol;Acc:MGI:1927638]	0.372871
Acox3	RIKEN cDNA 4931431C16 gene [Source:MGI Symbol;Acc:MGI:1921614]	0.372048
Serinc2	serine incorporator 2 [Source:MGI Symbol;Acc:MGI:1919132]	0.371592
Fn3krp	fructosamine 3 kinase related protein [Source:MGI Symbol;Acc:MGI:2679256]	0.37156
Mib2	mindbomb homolog 2 (Drosophila) [Source:MGI Symbol;Acc:MGI:2679684]	0.37149
Mlycd	malonyl-CoA decarboxylase [Source:MGI Symbol;Acc:MGI:1928485]	0.371397
Wdr19	WD repeat domain 19 [Source:MGI Symbol;Acc:MGI:2443231]	0.369589
Slc16a5	predicted gene 11695 [Source:MGI Symbol;Acc:MGI:3649841]	0.367626
Fam38b	family with sequence similarity 38, member B [Source:MGI Symbol;Acc:MGI:1918781]	0.367309
Sgms2	sphingomyelin synthase 2 [Source:MGI Symbol;Acc:MGI:1921692]	0.366181
Plk1s1	polo-like kinase 1 substrate 1 [Source:MGI Symbol;Acc:MGI:2684960]	0.366152
Aim1l	absent in melanoma 1-like [Source:MGI Symbol;Acc:MGI:1334463]	0.365458
Ppm1k	protein phosphatase 1K (PP2C domain containing) [Source:MGI Symbol;Acc:MGI:2442111]	0.364641
Fam83f	family with sequence similarity 83, member F [Source:MGI Symbol;Acc:MGI:2146227]	0.364385
Gsn	gelsolin [Source:MGI Symbol;Acc:MGI:95851]	0.363405
Pdlim2	PDZ and LIM domain 2 [Source:MGI Symbol;Acc:MGI:2384850]	0.362616
Slc41a3	solute carrier family 41, member 3 [Source:MGI Symbol;Acc:MGI:1918949]	0.362573
Cd82	CD82 antigen [Source:MGI Symbol;Acc:MGI:104651]	0.360284
Map3k6	mitogen-activated protein kinase kinase kinase 6 [Source:MGI Symbol;Acc:MGI:1855691]	0.359802
Prss50	protease, serine, 50 [Source:MGI Symbol;Acc:MGI:2447303]	0.358907
Kcnk6	potassium inwardly-rectifying channel, subfamily K, member 6 [Source:MGI Symbol;Acc:MGI:1891291]	0.358613
Ren1	renin 1 structural [Source:MGI Symbol;Acc:MGI:97898]	0.358575
Pck2	phosphoenolpyruvate carboxykinase 2 (mitochondrial) [Source:MGI Symbol;Acc:MGI:1860456]	0.358484
Hspb8	heat shock protein 8 [Source:MGI Symbol;Acc:MGI:2135756]	0.358323
She	src homology 2 domain-containing transforming protein E [Source:MGI Symbol;Acc:MGI:1099462]	0.358033
Krt18	keratin 18 [Source:MGI Symbol;Acc:MGI:96692]	0.357044
Blvrb	biliverdin reductase B (flavin reductase (NADPH)) [Source:MGI Symbol;Acc:MGI:2385271]	0.356928
Mical2	microtubule associated monoxygenase, calponin and LIM domain containing 2 [Source:MGI Symbol;Acc:MGI:2444947]	0.356869
Ero1lb	ERO1-like beta (S. cerevisiae) [Source:MGI Symbol;Acc:MGI:1914725]	0.356651
Gyltl1b	glycosyltransferase-like 1B [Source:MGI Symbol;Acc:MGI:2443769]	0.355687
Pltp	cathepsin A [Source:MGI Symbol;Acc:MGI:97748]	0.354385
Hrh1	histamine receptor H1 [Source:MGI Symbol;Acc:MGI:107619]	0.352699
Rhox6	reproductive homeobox 6 [Source:MGI Symbol;Acc:MGI:1202888]	0.352693
Plcxd2	predicted gene 15638 [Source:MGI Symbol;Acc:MGI:3783082]	0.351507
Lgals8	lectin, galactose binding, soluble 8 [Source:MGI Symbol;Acc:MGI:1928481]	0.350697
Serpine1	serine (or cysteine) peptidase inhibitor, clade E, member 1 [Source:MGI Symbol;Acc:MGI:97608]	0.349531
Pcdh12	protocadherin 12 [Source:MGI Symbol;Acc:MGI:1855700]	0.348805
Gadd45b	growth arrest and DNA-damage-inducible 45 beta [Source:MGI Symbol;Acc:MGI:107776]	0.348247
Aqp3	aquaporin 3 [Source:MGI Symbol;Acc:MGI:1333777]	0.347768
Rab11fip2	RAB11 family interacting protein 2 (class I) [Source:MGI Symbol;Acc:MGI:1922248]	0.347352
Metrn	meteorin, glial cell differentiation regulator [Source:MGI Symbol;Acc:MGI:1917333]	0.346733
Nxt2	nuclear transport factor 2-like export factor 2 [Source:MGI Symbol;Acc:MGI:2147914]	0.346349
Des	desmin [Source:MGI Symbol;Acc:MGI:94885]	0.346292
Lcp1	lymphocyte cytosolic protein 1 [Source:MGI Symbol;Acc:MGI:104808]	0.346284
Sowahb	sosondowah ankyrin repeat domain family member B [Source:MGI Symbol;Acc:MGI:1925338]	0.34598
Ttc26	tetratricopeptide repeat domain 26 [Source:MGI Symbol;Acc:MGI:2444853]	0.345046
Klhl15	kelch-like 15 (Drosophila) [Source:MGI Symbol;Acc:MGI:1923400]	0.344922
Slc5a5	solute carrier family 5 (sodium iodide symporter), member 5 [Source:MGI Symbol;Acc:MGI:2149330]	0.343151
Tubg2	tubulin, gamma 2 [Source:MGI Symbol;Acc:MGI:2144208]	0.342612
A430033K04Rik	RIKEN cDNA A430033K04 gene [Source:MGI Symbol;Acc:MGI:3583896]	0.340477
Hmcn2	hemicentin 2 [Source:MGI Symbol;Acc:MGI:2677838]	0.340237
Tshz1	teashirt zinc finger family member 1 [Source:MGI Symbol;Acc:MGI:1346031]	0.339147
Mypop	predicted gene 10676 [Source:MGI Symbol;Acc:MGI:3704283]	0.338804
Wrn	Werner syndrome homolog (human) [Source:MGI Symbol;Acc:MGI:109635]	0.338554
Irf6	interferon regulatory factor 6 [Source:MGI Symbol;Acc:MGI:1859211]	0.338261
Col2a1	collagen, type II, alpha 1 [Source:MGI Symbol;Acc:MGI:88452]	0.338065
Arhgap9	Rho GTPase activating protein 9 [Source:MGI Symbol;Acc:MGI:2143764]	0.338019
Tnfaip2	tumor necrosis factor, alpha-induced protein 2 [Source:MGI Symbol;Acc:MGI:104960]	0.335336
Pld2	phospholipase D2 [Source:MGI Symbol;Acc:MGI:892877]	0.334082
Evi5l	RIKEN cDNA 4932443L11 gene [Source:MGI Symbol;Acc:MGI:1926149]	0.333885
Spnb4	predicted gene 20479 [Source:MGI Symbol;Acc:MGI:5141944]	0.333668
Vash2	vasohibin 2 [Source:MGI Symbol;Acc:MGI:2444826]	0.326625
2610019F03Rik	RIKEN cDNA 2610019F03 gene [Source:MGI Symbol;Acc:MGI:1919398]	0.324989
BC031353	cDNA sequence BC031353 [Source:MGI Symbol;Acc:MGI:2387648]	0.324224
Stom	stomatin [Source:MGI Symbol;Acc:MGI:95403]	0.324029
Zc3h6	predicted gene 10762 [Source:MGI Symbol;Acc:MGI:3704209]	0.323309
Celf5	CUGBP, Elav-like family member 5 [Source:MGI Symbol;Acc:MGI:2442333]	0.322344
Paqr5	progestin and adipoQ receptor family member V [Source:MGI Symbol;Acc:MGI:1921340]	0.321456
Tmem121	transmembrane protein 121 [Source:MGI Symbol;Acc:MGI:1916445]	0.321359
Thbd	thrombomodulin [Source:MGI Symbol;Acc:MGI:98736]	0.32006
Lrfn3	leucine rich repeat and fibronectin type III domain containing 3 [Source:MGI Symbol;Acc:MGI:2442512]	0.317692
Npr2	predicted gene 12473 [Source:MGI Symbol;Acc:MGI:3652337]	0.316226
Kcnh2	potassium voltage-gated channel, subfamily H (eag-related), member 2 [Source:MGI Symbol;Acc:MGI:1341722]	0.316119
Siae	sialic acid acetylesterase [Source:MGI Symbol;Acc:MGI:104803]	0.315591
Agphd1	aminoglycoside phosphotransferase domain containing 1 [Source:MGI Symbol;Acc:MGI:2443139]	0.315537
Smpdl3b	sphingomyelin phosphodiesterase, acid-like 3B [Source:MGI Symbol;Acc:MGI:1916022]	0.309838
Lgals3	lectin, galactose binding, soluble 3 [Source:MGI Symbol;Acc:MGI:96778]	0.306601
Sct	secretin [Source:MGI Symbol;Acc:MGI:99466]	0.306439
Atf6	activating transcription factor 6 [Source:MGI Symbol;Acc:MGI:1926157]	0.30225
B4galnt3	beta-1,4-N-acetyl-galactosaminyl transferase 3 [Source:MGI Symbol;Acc:MGI:3041155]	0.298214
Mbp	myelin basic protein [Source:MGI Symbol;Acc:MGI:96925]	0.298167
Reep6	receptor accessory protein 6 [Source:MGI Symbol;Acc:MGI:1917585]	0.298138
Rora	RAR-related orphan receptor alpha [Source:MGI Symbol;Acc:MGI:104661]	0.298106
Tspan17	tetraspanin 17 [Source:MGI Symbol;Acc:MGI:1921507]	0.296701
Gpr180	G protein-coupled receptor 180 [Source:MGI Symbol;Acc:MGI:1930949]	0.295742
Parvb	parvin, beta [Source:MGI Symbol;Acc:MGI:2153063]	0.295594
Tcp11l2	t-complex 11 (mouse) like 2 [Source:MGI Symbol;Acc:MGI:2444679]	0.294259
Prrg4	proline rich Gla (G-carboxyglutamic acid) 4 (transmembrane) [Source:MGI Symbol;Acc:MGI:2442211]	0.293479
Rusc1	RUN and SH3 domain containing 1 [Source:MGI Symbol;Acc:MGI:1919546]	0.292999
Arsi	arylsulfatase i [Source:MGI Symbol;Acc:MGI:2670959]	0.292078
Crip1	cysteine-rich protein 1 (intestinal) [Source:MGI Symbol;Acc:MGI:88501]	0.291345
Meis3	Meis homeobox 3 [Source:MGI Symbol;Acc:MGI:108519]	0.289308
Ppp1r13b	protein phosphatase 1, regulatory (inhibitor) subunit 13B [Source:MGI Symbol;Acc:MGI:1336199]	0.288553
Acss2	gamma-glutamyltransferase 7 [Source:MGI Symbol;Acc:MGI:1913385]	0.287851
Ano10	anoctamin 10 [Source:MGI Symbol;Acc:MGI:2143103]	0.287597
Itgb3	integrin beta 3 [Source:MGI Symbol;Acc:MGI:96612]	0.287436
Ctsh	cathepsin H [Source:MGI Symbol;Acc:MGI:107285]	0.28686
Irs3	insulin receptor substrate 3 [Source:MGI Symbol;Acc:MGI:1194882]	0.286564
Fam160a1	ADP-ribosylation factor interacting protein 1 [Source:MGI Symbol;Acc:MGI:1277120]	0.286516
Cdcp1	CUB domain containing protein 1 [Source:MGI Symbol;Acc:MGI:2442010]	0.286247
Thnsl2	threonine synthase-like 2 (bacterial) [Source:MGI Symbol;Acc:MGI:3041254]	0.28532
Pdgfra	platelet derived growth factor receptor, alpha polypeptide [Source:MGI Symbol;Acc:MGI:97530]	0.284612
Extl1	exostoses (multiple)-like 1 [Source:MGI Symbol;Acc:MGI:1888742]	0.282314
Mettl7a1	methyltransferase like 7A1 [Source:MGI Symbol;Acc:MGI:1916523]	0.280808
Col5a3	collagen, type V, alpha 3 [Source:MGI Symbol;Acc:MGI:1858212]	0.28065
Gchfr	GTP cyclohydrolase I feedback regulator [Source:MGI Symbol;Acc:MGI:2443977]	0.280488
Aldh6a1	RIKEN cDNA 2900006K08 gene [Source:MGI Symbol;Acc:MGI:1920123]	0.279836
Unc13d	unc-13 homolog D (C. elegans) [Source:MGI Symbol;Acc:MGI:1917700]	0.276288
Gpr157	G protein-coupled receptor 157 [Source:MGI Symbol;Acc:MGI:2442046]	0.275462
Adck3	CDC42 binding protein kinase alpha [Source:MGI Symbol;Acc:MGI:2441841]	0.274714
Sp6	trans-acting transcription factor 6 [Source:MGI Symbol;Acc:MGI:1932575]	0.274453
Angel1	angel homolog 1 (Drosophila) [Source:MGI Symbol;Acc:MGI:1915987]	0.274069
Zbtb42	zinc finger and BTB domain containing 42 [Source:MGI Symbol;Acc:MGI:3644133]	0.274061
Lrp11	low density lipoprotein receptor-related protein 11 [Source:MGI Symbol;Acc:MGI:2442989]	0.273757
Arl6	ADP-ribosylation factor-like 6 [Source:MGI Symbol;Acc:MGI:1927136]	0.27303
Pnpo	RIKEN cDNA D030028A08 gene [Source:MGI Symbol;Acc:MGI:2441931]	0.272996
Rhpn1	rhophilin, Rho GTPase binding protein 1 [Source:MGI Symbol;Acc:MGI:1098783]	0.27277
Slc43a1	solute carrier family 43, member 1 [Source:MGI Symbol;Acc:MGI:1931352]	0.272206
Sbsn	suprabasin [Source:MGI Symbol;Acc:MGI:2446326]	0.271544
Ypel2	yippee-like 2 (Drosophila) [Source:MGI Symbol;Acc:MGI:1925114]	0.270181
2310030G06Rik	RIKEN cDNA 2310030G06 gene [Source:MGI Symbol;Acc:MGI:1914202]	0.27003
5033414D02Rik	RIKEN cDNA 5033414D02 gene [Source:MGI Symbol;Acc:MGI:1915009]	0.268123
Pax6	Pax6 opposite strand transcript 1 [Source:MGI Symbol;Acc:MGI:3028033]	0.267733
Cldn4	claudin 4 [Source:MGI Symbol;Acc:MGI:1313314]	0.266825
Mfsd12	major facilitator superfamily domain containing 12 [Source:MGI Symbol;Acc:MGI:3604804]	0.266587
Plekha6	pleckstrin homology domain containing, family A member 6 [Source:MGI Symbol;Acc:MGI:2388662]	0.266527
Liph	lipase, member H [Source:MGI Symbol;Acc:MGI:2388029]	0.266527
Mlkl	mixed lineage kinase domain-like [Source:MGI Symbol;Acc:MGI:1921818]	0.265979
Rundc3a	RUN domain containing 3A [Source:MGI Symbol;Acc:MGI:1858752]	0.265902
Arhgap8	Rho GTPase activating protein 8 [Source:MGI Symbol;Acc:MGI:1920417]	0.264001
Eif4e3	predicted gene 20696 [Source:MGI Symbol;Acc:MGI:5313143]	0.26322
2310028H24Rik	RIKEN cDNA 1700066J24 gene [Source:MGI Symbol;Acc:MGI:1924242]	0.260889
Tgm2	regulation of nuclear pre-mRNA domain containing 1B [Source:MGI Symbol;Acc:MGI:1917720]	0.26059
Vax2	Vax2 opposite strand transcript 2 [Source:MGI Symbol;Acc:MGI:3583303]	0.260037
Vdr	vitamin D receptor [Source:MGI Symbol;Acc:MGI:103076]	0.259874
Spata24	spermatogenesis associated 24 [Source:MGI Symbol;Acc:MGI:1918492]	0.25948
Atp8b1	ATPase, class I, type 8B, member 1 [Source:MGI Symbol;Acc:MGI:1859665]	0.259442
Tmem180	transmembrane protein 180 [Source:MGI Symbol;Acc:MGI:1922396]	0.258006
Arl4c	ADP-ribosylation factor-like 4C [Source:MGI Symbol;Acc:MGI:2445172]	0.257172
Pecam1	platelet/endothelial cell adhesion molecule 1 [Source:MGI Symbol;Acc:MGI:97537]	0.256858
Plbd1	phospholipase B domain containing 1 [Source:MGI Symbol;Acc:MGI:1914107]	0.253278
Hoxd13	homeobox D13 [Source:MGI Symbol;Acc:MGI:96205]	0.252621
Rab3d	RAB3D, member RAS oncogene family [Source:MGI Symbol;Acc:MGI:97844]	0.252074
Cda	cytidine deaminase [Source:MGI Symbol;Acc:MGI:1919519]	0.250175
Gpnmb	glycoprotein (transmembrane) nmb [Source:MGI Symbol;Acc:MGI:1934765]	0.249897
H2-D1	histocompatibility 2, D region locus 1 [Source:MGI Symbol;Acc:MGI:95896]	0.248998
Foxj2	forkhead box J2 [Source:MGI Symbol;Acc:MGI:1926805]	0.248968
Il28ra	interleukin 28 receptor alpha [Source:MGI Symbol;Acc:MGI:2429859]	0.248874
Krt8	keratin 8 [Source:MGI Symbol;Acc:MGI:96705]	0.248259
Sgk3	serum/glucocorticoid regulated kinase 3 [Source:MGI Symbol;Acc:MGI:2182368]	0.247568
Hsf4	heat shock transcription factor 4 [Source:MGI Symbol;Acc:MGI:1347058]	0.246787
Sim2	single-minded homolog 2 (Drosophila) [Source:MGI Symbol;Acc:MGI:98307]	0.245944
Atg9b	nitric oxide synthase 3, endothelial cell [Source:MGI Symbol;Acc:MGI:97362]	0.245416
Sarm1	sterile alpha and HEAT/Armadillo motif containing 1 [Source:MGI Symbol;Acc:MGI:2136419]	0.245014
1200009I06Rik	RIKEN cDNA 1200009I06 gene [Source:MGI Symbol;Acc:MGI:1921363]	0.244985
Lamc2	laminin, gamma 2 [Source:MGI Symbol;Acc:MGI:99913]	0.244842
Ppp4r4	protein phosphatase 4, regulatory subunit 4 [Source:MGI Symbol;Acc:MGI:1921771]	0.244754
Stk31	serine threonine kinase 31 [Source:MGI Symbol;Acc:MGI:1924735]	0.243546
Gpr126	G protein-coupled receptor 126 [Source:MGI Symbol;Acc:MGI:1916151]	0.243202
Dock8	dedicator of cytokinesis 8 [Source:MGI Symbol;Acc:MGI:1921396]	0.242887
Gm1614	predicted gene 1614 [Source:MGI Symbol;Acc:MGI:2686460]	0.242489
4930455F23Rik	RIKEN cDNA 4930455F23 gene [Source:MGI Symbol;Acc:MGI:1922145]	0.241696
Ptpdc1	protein tyrosine phosphatase domain containing 1 [Source:MGI Symbol;Acc:MGI:2145430]	0.240697
Tjp3	amyloid beta (A4) precursor protein-binding, family A, member 3 [Source:MGI Symbol;Acc:MGI:1888527]	0.239868
Tfpi	tissue factor pathway inhibitor [Source:MGI Symbol;Acc:MGI:1095418]	0.237687
Amigo1	adhesion molecule with Ig like domain 1 [Source:MGI Symbol;Acc:MGI:2653612]	0.236815
Ankrd33b	ankyrin repeat domain 33B [Source:MGI Symbol;Acc:MGI:1917904]	0.236452
Zbtb8a	zinc finger and BTB domain containing 8 opposite strand [Source:MGI Symbol;Acc:MGI:1914356]	0.236104
Cdkn2c	cyclin-dependent kinase inhibitor 2C (p18, inhibits CDK4) [Source:MGI Symbol;Acc:MGI:105388]	0.235895
Sqrdl	sulfide quinone reductase-like (yeast) [Source:MGI Symbol;Acc:MGI:1929899]	0.235684
Eif2c4	eukaryotic translation initiation factor 2C, 4 [Source:MGI Symbol;Acc:MGI:1924100]	0.233255
Krt7	keratin 7 [Source:MGI Symbol;Acc:MGI:96704]	0.233105
Zbtb32	zinc finger and BTB domain containing 32 [Source:MGI Symbol;Acc:MGI:1891838]	0.230647
Sec14l4	SEC14-like 4 (S. cerevisiae) [Source:MGI Symbol;Acc:MGI:2144095]	0.230054
Hoxb13	homeobox B13 [Source:MGI Symbol;Acc:MGI:107730]	0.228376
Zcwpw1	zinc finger, CW type with PWWP domain 1 [Source:MGI Symbol;Acc:MGI:2685899]	0.226577
Dnajc12	DnaJ (Hsp40) homolog, subfamily C, member 12 [Source:MGI Symbol;Acc:MGI:1353428]	0.226521
Tmem8b	RIKEN cDNA 4930412F15 gene [Source:MGI Symbol;Acc:MGI:2441678]	0.225922
Ltbp4	latent transforming growth factor beta binding protein 4 [Source:MGI Symbol;Acc:MGI:1321395]	0.221958
Prom2	prominin 2 [Source:MGI Symbol;Acc:MGI:2138997]	0.221957
Pex11a	peroxisomal biogenesis factor 11 alpha [Source:MGI Symbol;Acc:MGI:1338788]	0.221675
Dennd5b	DENN/MADD domain containing 5B [Source:MGI Symbol;Acc:MGI:2444273]	0.221229
Sft2d2	SFT2 domain containing 2 [Source:MGI Symbol;Acc:MGI:1917362]	0.219018
Alox12	arachidonate 12-lipoxygenase [Source:MGI Symbol;Acc:MGI:87998]	0.218355
Fndc4	fibronectin type III domain containing 4 [Source:MGI Symbol;Acc:MGI:1917195]	0.215795
Stk30	serine/threonine kinase 30 [Source:MGI Symbol;Acc:MGI:1336881]	0.214554
2810030E01Rik	RIKEN cDNA 2810030E01 gene [Source:MGI Symbol;Acc:MGI:1919918]	0.213947
Epn3	epsin 3 [Source:MGI Symbol;Acc:MGI:1919139]	0.213679
Camk2n2	endothelin converting enzyme 2 [Source:MGI Symbol;Acc:MGI:1101356]	0.212836
Psd4	pleckstrin and Sec7 domain containing 4 [Source:MGI Symbol;Acc:MGI:2674093]	0.210047
Sema4f	sema domain, immunoglobulin domain (Ig), TM domain, and short cytoplasmic domain [Source:MGI Symbol;Acc:MGI:1340055]	0.209916
Ltk	leukocyte tyrosine kinase [Source:MGI Symbol;Acc:MGI:96840]	0.209296
Mitf	microphthalmia-associated transcription factor [Source:MGI Symbol;Acc:MGI:104554]	0.208889
Pkp3	plakophilin 3 [Source:MGI Symbol;Acc:MGI:1891830]	0.208871
Cmtm5	CKLF-like MARVEL transmembrane domain containing 5 [Source:MGI Symbol;Acc:MGI:2447164]	0.207272
Hcn2	hyperpolarization-activated, cyclic nucleotide-gated K+ 2 [Source:MGI Symbol;Acc:MGI:1298210]	0.205861
Fbxl16	F-box and leucine-rich repeat protein 16 [Source:MGI Symbol;Acc:MGI:2448488]	0.205069
Nrk	Nik related kinase [Source:MGI Symbol;Acc:MGI:1351326]	0.205004
Zfp94	zinc finger protein 94 [Source:MGI Symbol;Acc:MGI:107610]	0.203663
Aim1	absent in melanoma 1 [Source:MGI Symbol;Acc:MGI:109544]	0.200931
Tle2	predicted gene 15917 [Source:MGI Symbol;Acc:MGI:3801972]	0.199772
Oas3	2'-5' oligoadenylate synthetase 3 [Source:MGI Symbol;Acc:MGI:2180850]	0.199004
Tgm1	transglutaminase 1, K polypeptide [Source:MGI Symbol;Acc:MGI:98730]	0.198727
Kif5a	kinesin family member 5A [Source:MGI Symbol;Acc:MGI:109564]	0.197639
Osgin1	oxidative stress induced growth inhibitor 1 [Source:MGI Symbol;Acc:MGI:1919089]	0.197541
Il12rb1	interleukin 12 receptor, beta 1 [Source:MGI Symbol;Acc:MGI:104579]	0.196538
Wfdc2	WAP four-disulfide core domain 2 [Source:MGI Symbol;Acc:MGI:1914951]	0.196403
Phactr1	phosphatase and actin regulator 1 [Source:MGI Symbol;Acc:MGI:2659021]	0.195704
Osmr	oncostatin M receptor [Source:MGI Symbol;Acc:MGI:1330819]	0.195248
Plekhg6	pleckstrin homology domain containing, family G (with RhoGef domain) member 6 [Source:MGI Symbol;Acc:MGI:2682298]	0.194595
Gata2	GATA binding protein 2 [Source:MGI Symbol;Acc:MGI:95662]	0.192502
Foxc1	forkhead box C1 [Source:MGI Symbol;Acc:MGI:1347466]	0.187927
Shroom1	shroom family member 1 [Source:MGI Symbol;Acc:MGI:1919024]	0.184769
Rgl3	ral guanine nucleotide dissociation stimulator-like 3 [Source:MGI Symbol;Acc:MGI:1918996]	0.182447
Rab8b	RAB8B, member RAS oncogene family [Source:MGI Symbol;Acc:MGI:2442982]	0.179636
Fmnl1	formin-like 1 [Source:MGI Symbol;Acc:MGI:1888994]	0.176055
Mmrn2	multimerin 2 [Source:MGI Symbol;Acc:MGI:2385618]	0.175442
Sema7a	sema domain, immunoglobulin domain (Ig), and GPI membrane anchor, (semaphorin) 7A [Source:MGI Symbol;Acc:MGI:1306826]	0.175322
Zscan10	zinc finger and SCAN domain containing 10 [Source:MGI Symbol;Acc:MGI:3040700]	0.17485
Chdh	choline dehydrogenase [Source:MGI Symbol;Acc:MGI:1860776]	0.174363
Tmem221	transmembrane protein 221 [Source:MGI Symbol;Acc:MGI:3525074]	0.173919
Rgs14	regulator of G-protein signaling 14 [Source:MGI Symbol;Acc:MGI:1859709]	0.172603
Prkch	protein kinase C, eta [Source:MGI Symbol;Acc:MGI:97600]	0.172148
Cdx1	caudal type homeobox 1 [Source:MGI Symbol;Acc:MGI:88360]	0.172097
Gng7	guanine nucleotide binding protein (G protein), gamma 7 [Source:MGI Symbol;Acc:MGI:95787]	0.171243
Il2rb	interleukin 2 receptor, beta chain [Source:MGI Symbol;Acc:MGI:96550]	0.171013
Kif9	kinesin family member 9 [Source:MGI Symbol;Acc:MGI:1098237]	0.170561
Loh12cr1	loss of heterozygosity, 12, chromosomal region 1 homolog (human) [Source:MGI Symbol;Acc:MGI:1915024]	0.170137
Rasa4	RAS p21 protein activator 4 [Source:MGI Symbol;Acc:MGI:1858600]	0.169518
Zfp36l3	zinc finger protein 36, C3H type-like 3 [Source:MGI Symbol;Acc:MGI:3525151]	0.169151
Msx3	homeobox, msh-like 3 [Source:MGI Symbol;Acc:MGI:106587]	0.168492
D330028D13Rik	RIKEN cDNA D330028D13 gene [Source:MGI Symbol;Acc:MGI:2442161]	0.167442
Was	Wiskott-Aldrich syndrome homolog (human) [Source:MGI Symbol;Acc:MGI:105059]	0.166735
Tns4	tensin 4 [Source:MGI Symbol;Acc:MGI:2144377]	0.166328
Myh14	myosin, heavy polypeptide 14 [Source:MGI Symbol;Acc:MGI:1919210]	0.165663
Dsp	desmoplakin [Source:MGI Symbol;Acc:MGI:109611]	0.163834
Serpinb9b	serine (or cysteine) peptidase inhibitor, clade B, member 9b [Source:MGI Symbol;Acc:MGI:894668]	0.161484
Afap1l1	actin filament associated protein 1-like 1 [Source:MGI Symbol;Acc:MGI:2147199]	0.160013
1600025M17Rik	RIKEN cDNA 1600025M17 gene [Source:MGI Symbol;Acc:MGI:1919280]	0.158559
Pdk2	pyruvate dehydrogenase kinase, isoenzyme 2 [Source:MGI Symbol;Acc:MGI:1343087]	0.155633
Kcnn4	potassium intermediate/small conductance calcium-activated channel, subfamily N, member 4 [Source:MGI Symbol;Acc:MGI:1277957]	0.154499
Ifih1	interferon induced with helicase C domain 1 [Source:MGI Symbol;Acc:MGI:1918836]	0.152272
Nos3	nitric oxide synthase 3, endothelial cell [Source:MGI Symbol;Acc:MGI:97362]	0.152249
Tdrkh	tudor and KH domain containing protein [Source:MGI Symbol;Acc:MGI:1919884]	0.149444
Apobec3	apolipoprotein B mRNA editing enzyme, catalytic polypeptide 3 [Source:MGI Symbol;Acc:MGI:1933111]	0.147857
3830417A13Rik	RIKEN cDNA 3830417A13 gene [Source:MGI Symbol;Acc:MGI:1917946]	0.147227
Rnf144b	ring finger protein 144B [Source:MGI Symbol;Acc:MGI:2384986]	0.145821
Aph1c	anterior pharynx defective 1c homolog (C. elegans) [Source:MGI Symbol;Acc:MGI:1915568]	0.143172
Ehhadh	enoyl-Coenzyme A, hydratase/3-hydroxyacyl Coenzyme A dehydrogenase [Source:MGI Symbol;Acc:MGI:1277964]	0.142927
Pparg	peroxisome proliferator activated receptor gamma [Source:MGI Symbol;Acc:MGI:97747]	0.141394
Ripk3	receptor-interacting serine-threonine kinase 3 [Source:MGI Symbol;Acc:MGI:2154952]	0.141287
Dnase1l3	deoxyribonuclease 1-like 3 [Source:MGI Symbol;Acc:MGI:1314633]	0.14091
Tbx2	T-box 2 [Source:MGI Symbol;Acc:MGI:98494]	0.139622
Cdh5	cadherin 5 [Source:MGI Symbol;Acc:MGI:105057]	0.138673
Trim54	tripartite motif-containing 54 [Source:MGI Symbol;Acc:MGI:1889623]	0.138499
Acvrl1	activin A receptor, type II-like 1 [Source:MGI Symbol;Acc:MGI:1338946]	0.13719
Mgll	monoglyceride lipase [Source:MGI Symbol;Acc:MGI:1346042]	0.13191
Arhgef37	Rho guanine nucleotide exchange factor (GEF) 37 [Source:MGI Symbol;Acc:MGI:3045339]	0.131645
Lrrc8e	leucine rich repeat containing 8 family, member E [Source:MGI Symbol;Acc:MGI:1919517]	0.131269
Ebf2	early B cell factor 2 [Source:MGI Symbol;Acc:MGI:894332]	0.129364
Mid2	midline 2 [Source:MGI Symbol;Acc:MGI:1344333]	0.127733
Clcf1	cardiotrophin-like cytokine factor 1 [Source:MGI Symbol;Acc:MGI:1930088]	0.127141
Cxcl16	chemokine (C-X-C motif) ligand 16 [Source:MGI Symbol;Acc:MGI:1932682]	0.126949
Irx4	Iroquois related homeobox 4 (Drosophila) [Source:MGI Symbol;Acc:MGI:1355275]	0.125875
Ripply3	ripply3 homolog (zebrafish) [Source:MGI Symbol;Acc:MGI:2181192]	0.12475
Atp2c2	ATPase, Ca++ transporting, type 2C, member 2 [Source:MGI Symbol;Acc:MGI:1916297]	0.124103
Parp14	poly (ADP-ribose) polymerase family, member 14 [Source:MGI Symbol;Acc:MGI:1919489]	0.121529
D030028A08Rik	CDK5 regulatory subunit associated protein 3 [Source:MGI Symbol;Acc:MGI:1933126]	0.120892
Cldn7	claudin 7 [Source:MGI Symbol;Acc:MGI:1859285]	0.118355
Phka1	phosphorylase kinase alpha 1 [Source:MGI Symbol;Acc:MGI:97576]	0.117842
Tacstd2	tumor-associated calcium signal transducer 2 [Source:MGI Symbol;Acc:MGI:1861606]	0.112438
Hopx	HOP homeobox [Source:MGI Symbol;Acc:MGI:1916782]	0.110343
Cntnap1	pleckstrin homology domain containing, family H (with MyTH4 domain) member 3 [Source:MGI Symbol;Acc:MGI:2384950]	0.109677
Irak3	interleukin-1 receptor-associated kinase 3 [Source:MGI Symbol;Acc:MGI:1921164]	0.109439
Csf1r	colony stimulating factor 1 receptor [Source:MGI Symbol;Acc:MGI:1339758]	0.10858
Nkx2-5	NK2 transcription factor related, locus 5 (Drosophila) [Source:MGI Symbol;Acc:MGI:97350]	0.104436
Serpinb9g	serine (or cysteine) peptidase inhibitor, clade B, member 9g [Source:MGI Symbol;Acc:MGI:1919260]	0.104075
Mns1	meiosis-specific nuclear structural protein 1 [Source:MGI Symbol;Acc:MGI:107933]	0.102961
Tlx1	T cell leukemia, homeobox 1 [Source:MGI Symbol;Acc:MGI:98769]	0.101713
E130309D14Rik	RIKEN cDNA E130309D14 gene [Source:MGI Symbol;Acc:MGI:3588240]	0.101547
Ptpn21	protein tyrosine phosphatase, non-receptor type 21 [Source:MGI Symbol;Acc:MGI:1344406]	0.0991437
Pax9	predicted gene 15524 [Source:MGI Symbol;Acc:MGI:3782971]	0.088309
Crebl2	cAMP responsive element binding protein-like 2 [Source:MGI Symbol;Acc:MGI:1889385]	0.086874
Kazald1	Kazal-type serine peptidase inhibitor domain 1 [Source:MGI Symbol;Acc:MGI:2147606]	0.0865841
Tmem30b	transmembrane protein 30B [Source:MGI Symbol;Acc:MGI:2442082]	0.0845844
Prss12	protease, serine, 12 neurotrypsin (motopsin) [Source:MGI Symbol;Acc:MGI:1100881]	0.0826997
Txndc16	thioredoxin domain containing 16 [Source:MGI Symbol;Acc:MGI:1917811]	0.0826642
Lepr	leptin receptor [Source:MGI Symbol;Acc:MGI:104993]	0.0821464
Slc2a5	solute carrier family 2 (facilitated glucose transporter), member 5 [Source:MGI Symbol;Acc:MGI:1928369]	0.0768284
Aldh3b2	aldehyde dehydrogenase 3 family, member B2 [Source:MGI Symbol;Acc:MGI:2147613]	0.0758427
Fnd3c2	fibronectin type III domain containing 3C2 [Source:MGI Symbol;Acc:MGI:2685621]	0.0755823
Arhgef6	Rac/Cdc42 guanine nucleotide exchange factor (GEF) 6 [Source:MGI Symbol;Acc:MGI:1920591]	0.0704616
Klhdc1	kelch domain containing 1 [Source:MGI Symbol;Acc:MGI:2672853]	0.0660706
Sat2	spermidine/spermine N1-acetyl transferase 2 [Source:MGI Symbol;Acc:MGI:1916465]	0.0645832
Tmem62	transmembrane protein 62 [Source:MGI Symbol;Acc:MGI:2139461]	0.0641016
Il17re	interleukin 17 receptor E [Source:MGI Symbol;Acc:MGI:1889371]	0.0588947
Entpd1	ectonucleoside triphosphate diphosphohydrolase 1 [Source:MGI Symbol;Acc:MGI:102805]	0.0505546
Nrn1	neuritin 1 [Source:MGI Symbol;Acc:MGI:1915654]	0.0496846
Dmrt2	doublesex and mab-3 related transcription factor 2 [Source:MGI Symbol;Acc:MGI:1330307]	0.0485898
Isl2	insulin related protein 2 (islet 2) [Source:MGI Symbol;Acc:MGI:109156]	0.0442683
Igf2bp3	RIKEN cDNA 2410003K15 gene [Source:MGI Symbol;Acc:MGI:1922843]	0.043937
B3gnt3	UDP-GlcNAc:betaGal beta-1,3-N-acetylglucosaminyltransferase 3 [Source:MGI Symbol;Acc:MGI:2152535]	0.0437987
Kcnj10	potassium inwardly-rectifying channel, subfamily J, member 10 [Source:MGI Symbol;Acc:MGI:1194504]	0.0399478
Ctsr	cathepsin R [Source:MGI Symbol;Acc:MGI:1861723]	0.0317967
A430105I19Rik	RIKEN cDNA A430105I19 gene [Source:MGI Symbol;Acc:MGI:2685199]	0.0310911
Serpinb9f	serine (or cysteine) peptidase inhibitor, clade B, member 9f [Source:MGI Symbol;Acc:MGI:894671]	0.0287728
Bzrap1	benzodiazepine receptor associated protein 1 [Source:MGI Symbol;Acc:MGI:2450877]	0.0276553
Serpinb9d	serine (or cysteine) peptidase inhibitor, clade B, member 9d [Source:MGI Symbol;Acc:MGI:894667]	0.0250469
Rhox12	reproductive homeobox 12 [Source:MGI Symbol;Acc:MGI:2685994]	0.0189011
Ctsj	cathepsin J [Source:MGI Symbol;Acc:MGI:1349426]	0.0153078

## Sheet: DESeq2_and_inten. Diff.<0.05_0D
69 genes dysregulated in Bap1 KO mTSC growing in stem cell conditions (0D), called by both DESeq2 and intensity difference p<0.05
Probe	Description	Fold change
Adcy5	adenylate cyclase 5 [Source:MGI Symbol;Acc:MGI:99673]	41.2124
Thbs1	thrombospondin 1 [Source:MGI Symbol;Acc:MGI:98737]	26.9076
Gja1	gap junction protein, alpha 1 [Source:MGI Symbol;Acc:MGI:95713]	22.1177
Fut9	fucosyltransferase 9 [Source:MGI Symbol;Acc:MGI:1330859]	20.173
Sox11	SRY-box containing gene 11 [Source:MGI Symbol;Acc:MGI:98359]	12.9376
Rragd	Ras-related GTP binding D [Source:MGI Symbol;Acc:MGI:1098604]	11.9883
Dclk2	doublecortin-like kinase 2 [Source:MGI Symbol;Acc:MGI:1918012]	8.59421
Mrc2	mannose receptor, C type 2 [Source:MGI Symbol;Acc:MGI:107818]	6.69527
Igfbp2	insulin-like growth factor binding protein 2 [Source:MGI Symbol;Acc:MGI:96437]	6.24394
Vgf	VGF nerve growth factor inducible [Source:MGI Symbol;Acc:MGI:1343180]	4.7499
Prex2	No description	4.31652
Slc40a1	solute carrier family 40 (iron-regulated transporter), member 1 [Source:MGI Symbol;Acc:MGI:1315204]	4.27475
Lrrn4	leucine rich repeat neuronal 4 [Source:MGI Symbol;Acc:MGI:2445154]	3.52998
Syt13	synaptotagmin XIII [Source:MGI Symbol;Acc:MGI:1933945]	3.52066
Fam49a	family with sequence similarity 49, member A [Source:MGI Symbol;Acc:MGI:1261783]	3.19927
Bex4	brain expressed gene 4 [Source:MGI Symbol;Acc:MGI:3606746]	2.91551
Dbn1	drebrin 1 [Source:MGI Symbol;Acc:MGI:1931838]	2.89918
Fscn1	fascin homolog 1, actin bundling protein (Strongylocentrotus purpuratus) [Source:MGI Symbol;Acc:MGI:1352745]	2.24624
Slc2a1	solute carrier family 2 (facilitated glucose transporter), member 1 [Source:MGI Symbol;Acc:MGI:95755]	0.515995
Ctsl	cathepsin L [Source:MGI Symbol;Acc:MGI:88564]	0.511375
Limk2	LIM motif-containing protein kinase 2 [Source:MGI Symbol;Acc:MGI:1197517]	0.496712
Myh9	myosin, heavy polypeptide 9, non-muscle [Source:MGI Symbol;Acc:MGI:107717]	0.495199
Errfi1	RIKEN cDNA 1700045H11 gene [Source:MGI Symbol;Acc:MGI:1920598]	0.483663
Zyx	zyxin [Source:MGI Symbol;Acc:MGI:103072]	0.481951
Anxa2	annexin A2 [Source:MGI Symbol;Acc:MGI:88246]	0.455249
Baz1a	bromodomain adjacent to zinc finger domain 1A [Source:MGI Symbol;Acc:MGI:1309478]	0.435965
Efs	embryonal Fyn-associated substrate [Source:MGI Symbol;Acc:MGI:105311]	0.424424
Efhd2	EF hand domain containing 2 [Source:MGI Symbol;Acc:MGI:106504]	0.418277
Bcor	BCL6 interacting corepressor [Source:MGI Symbol;Acc:MGI:1918708]	0.397861
AC104834.1	putative fidgetin-like protein 2 [Source:RefSeq peptide;Acc:NP_001201840]	0.378433
Itga6	integrin alpha 6 [Source:MGI Symbol;Acc:MGI:96605]	0.376383
Klf9	Kruppel-like factor 9 [Source:MGI Symbol;Acc:MGI:1333856]	0.375145
Gsn	gelsolin [Source:MGI Symbol;Acc:MGI:95851]	0.363405
Krt18	keratin 18 [Source:MGI Symbol;Acc:MGI:96692]	0.357044
Rhox6	reproductive homeobox 6 [Source:MGI Symbol;Acc:MGI:1202888]	0.352693
Serpine1	serine (or cysteine) peptidase inhibitor, clade E, member 1 [Source:MGI Symbol;Acc:MGI:97608]	0.349531
Lcp1	lymphocyte cytosolic protein 1 [Source:MGI Symbol;Acc:MGI:104808]	0.346284
B4galnt3	beta-1,4-N-acetyl-galactosaminyl transferase 3 [Source:MGI Symbol;Acc:MGI:3041155]	0.298214
Mbp	myelin basic protein [Source:MGI Symbol;Acc:MGI:96925]	0.298167
Parvb	parvin, beta [Source:MGI Symbol;Acc:MGI:2153063]	0.295594
Cdcp1	CUB domain containing protein 1 [Source:MGI Symbol;Acc:MGI:2442010]	0.286247
Extl1	exostoses (multiple)-like 1 [Source:MGI Symbol;Acc:MGI:1888742]	0.282314
Pnpo	RIKEN cDNA D030028A08 gene [Source:MGI Symbol;Acc:MGI:2441931]	0.272996
Cldn4	claudin 4 [Source:MGI Symbol;Acc:MGI:1313314]	0.266825
Arl4c	ADP-ribosylation factor-like 4C [Source:MGI Symbol;Acc:MGI:2445172]	0.257172
H2-D1	histocompatibility 2, D region locus 1 [Source:MGI Symbol;Acc:MGI:95896]	0.248998
Krt8	keratin 8 [Source:MGI Symbol;Acc:MGI:96705]	0.248259
Tfpi	tissue factor pathway inhibitor [Source:MGI Symbol;Acc:MGI:1095418]	0.237687
Krt7	keratin 7 [Source:MGI Symbol;Acc:MGI:96704]	0.233105
Sft2d2	SFT2 domain containing 2 [Source:MGI Symbol;Acc:MGI:1917362]	0.219018
Nrk	Nik related kinase [Source:MGI Symbol;Acc:MGI:1351326]	0.205004
Gata2	GATA binding protein 2 [Source:MGI Symbol;Acc:MGI:95662]	0.192502
Sema7a	sema domain, immunoglobulin domain (Ig), and GPI membrane anchor, (semaphorin) 7A [Source:MGI Symbol;Acc:MGI:1306826]	0.175322
Tns4	tensin 4 [Source:MGI Symbol;Acc:MGI:2144377]	0.166328
Dsp	desmoplakin [Source:MGI Symbol;Acc:MGI:109611]	0.163834
Afap1l1	actin filament associated protein 1-like 1 [Source:MGI Symbol;Acc:MGI:2147199]	0.160013
Apobec3	apolipoprotein B mRNA editing enzyme, catalytic polypeptide 3 [Source:MGI Symbol;Acc:MGI:1933111]	0.147857
3830417A13Rik	RIKEN cDNA 3830417A13 gene [Source:MGI Symbol;Acc:MGI:1917946]	0.147227
Ripk3	receptor-interacting serine-threonine kinase 3 [Source:MGI Symbol;Acc:MGI:2154952]	0.141287
Atp2c2	ATPase, Ca++ transporting, type 2C, member 2 [Source:MGI Symbol;Acc:MGI:1916297]	0.124103
Cldn7	claudin 7 [Source:MGI Symbol;Acc:MGI:1859285]	0.118355
Tacstd2	tumor-associated calcium signal transducer 2 [Source:MGI Symbol;Acc:MGI:1861606]	0.112438
Ptpn21	protein tyrosine phosphatase, non-receptor type 21 [Source:MGI Symbol;Acc:MGI:1344406]	0.0991437
Tmem30b	transmembrane protein 30B [Source:MGI Symbol;Acc:MGI:2442082]	0.0845844
Arhgef6	Rac/Cdc42 guanine nucleotide exchange factor (GEF) 6 [Source:MGI Symbol;Acc:MGI:1920591]	0.0704616
Igf2bp3	RIKEN cDNA 2410003K15 gene [Source:MGI Symbol;Acc:MGI:1922843]	0.043937
B3gnt3	UDP-GlcNAc:betaGal beta-1,3-N-acetylglucosaminyltransferase 3 [Source:MGI Symbol;Acc:MGI:2152535]	0.0437987
Kcnj10	potassium inwardly-rectifying channel, subfamily J, member 10 [Source:MGI Symbol;Acc:MGI:1194504]	0.0399478
Ctsj	cathepsin J [Source:MGI Symbol;Acc:MGI:1349426]	0.0153078

## Sheet: DESeq2_and_FPKM FC>2_3D
984 genes dysregulated in Bap1 KO mTSC during differentiation (3d), called by both DESeq2 and FPKM fold change >2
Probe	Description	Fold change
Ptgs2	prostaglandin-endoperoxide synthase 2 [Source:MGI Symbol;Acc:MGI:97798]	616.41
Myl9	myosin, light polypeptide 9, regulatory [Source:MGI Symbol;Acc:MGI:2138915]	316.231
Col3a1	collagen, type III, alpha 1 [Source:MGI Symbol;Acc:MGI:88453]	281.732
Acta2	actin, alpha 2, smooth muscle, aorta [Source:MGI Symbol;Acc:MGI:87909]	276.986
Stc1	stanniocalcin 1 [Source:MGI Symbol;Acc:MGI:109131]	246.856
Flrt3	MACRO domain containing 2 [Source:MGI Symbol;Acc:MGI:1920149]	113.335
Cntnap2	contactin associated protein-like 2 [Source:MGI Symbol;Acc:MGI:1914047]	112.929
Lmod1	leiomodin 1 (smooth muscle) [Source:MGI Symbol;Acc:MGI:2135671]	94.9563
Fibcd1	fibrinogen C domain containing 1 [Source:MGI Symbol;Acc:MGI:2138953]	86.0866
Ntf3	neurotrophin 3 [Source:MGI Symbol;Acc:MGI:97380]	75.2638
Gm2381	predicted gene 2381 [Source:MGI Symbol;Acc:MGI:3780549]	74.9949
Gpc6	glypican 6 [Source:MGI Symbol;Acc:MGI:1346322]	73.2082
Pla2g4a	phospholipase A2, group IVA (cytosolic, calcium-dependent) [Source:MGI Symbol;Acc:MGI:1195256]	72.3113
Nudt11	nudix (nucleoside diphosphate linked moiety X)-type motif 11 [Source:MGI Symbol;Acc:MGI:1930957]	72.0122
Acta1	predicted gene 20388 [Source:MGI Symbol;Acc:MGI:5141853]	70.0884
Ly6a	lymphocyte antigen 6 complex, locus A [Source:MGI Symbol;Acc:MGI:107527]	68.5829
Ndufa4l2	NADH dehydrogenase (ubiquinone) 1 alpha subcomplex, 4-like 2 [Source:MGI Symbol;Acc:MGI:3039567]	66.0623
Adcy5	adenylate cyclase 5 [Source:MGI Symbol;Acc:MGI:99673]	59.3999
Actg2	actin, gamma 2, smooth muscle, enteric [Source:MGI Symbol;Acc:MGI:104589]	50.4652
Pcdh18	protocadherin 18 [Source:MGI Symbol;Acc:MGI:1920423]	47.4822
Fam81a	family with sequence similarity 81, member A [Source:MGI Symbol;Acc:MGI:1924136]	46.2953
Ano4	anoctamin 4 [Source:MGI Symbol;Acc:MGI:2443344]	46.0709
Gm8281	predicted pseudogene 8281 [Source:MGI Symbol;Acc:MGI:3647811]	45.0636
Fam171a2	granulin [Source:MGI Symbol;Acc:MGI:95832]	42.9858
Chrd	thrombopoietin [Source:MGI Symbol;Acc:MGI:101875]	42.664
Kif26b	kinesin family member 26B [Source:MGI Symbol;Acc:MGI:2447076]	40.4937
Fjx1	four jointed box 1 (Drosophila) [Source:MGI Symbol;Acc:MGI:1341907]	39.5399
St8sia4	ST8 alpha-N-acetyl-neuraminide alpha-2,8-sialyltransferase 4 [Source:MGI Symbol;Acc:MGI:106018]	39.4745
Mrc2	mannose receptor, C type 2 [Source:MGI Symbol;Acc:MGI:107818]	38.1554
Pcsk5	proprotein convertase subtilisin/kexin type 5 [Source:MGI Symbol;Acc:MGI:97515]	37.9453
Ccl7	chemokine (C-C motif) ligand 7 [Source:MGI Symbol;Acc:MGI:99512]	37.4308
Ctnnd2	catenin (cadherin associated protein), delta 2 [Source:MGI Symbol;Acc:MGI:1195966]	37.1616
Pgam2	phosphoglycerate mutase 2 [Source:MGI Symbol;Acc:MGI:1933118]	35.4362
F8	coagulation factor VIII [Source:MGI Symbol;Acc:MGI:88383]	33.6307
Ppp1r16b	protein phosphatase 1, regulatory (inhibitor) subunit 16B [Source:MGI Symbol;Acc:MGI:2151841]	32.9476
Scg5	secretogranin V [Source:MGI Symbol;Acc:MGI:98289]	32.8214
Fst	follistatin [Source:MGI Symbol;Acc:MGI:95586]	31.4845
Cttnbp2	cortactin binding protein 2 [Source:MGI Symbol;Acc:MGI:1353467]	31.3937
Npr3	natriuretic peptide receptor 3 [Source:MGI Symbol;Acc:MGI:97373]	30.7971
Iglon5	IgLON family member 5 [Source:MGI Symbol;Acc:MGI:2686277]	30.6681
Lingo3	leucine rich repeat and Ig domain containing 3 [Source:MGI Symbol;Acc:MGI:3609246]	30.0492
Eras	proprotein convertase subtilisin/kexin type 1 inhibitor [Source:MGI Symbol;Acc:MGI:1353431]	29.849
Gja1	gap junction protein, alpha 1 [Source:MGI Symbol;Acc:MGI:95713]	29.6819
Nkain4	Na+/K+ transporting ATPase interacting 4 [Source:MGI Symbol;Acc:MGI:1915372]	29.1047
Tnc	tenascin C [Source:MGI Symbol;Acc:MGI:101922]	28.3511
Hdx	highly divergent homeobox [Source:MGI Symbol;Acc:MGI:2685226]	28.0075
Coch	coagulation factor C homolog (Limulus polyphemus) [Source:MGI Symbol;Acc:MGI:1278313]	27.6765
Hcn4	hyperpolarization-activated, cyclic nucleotide-gated K+ 4 [Source:MGI Symbol;Acc:MGI:1298209]	26.6813
Moxd1	monooxygenase, DBH-like 1 [Source:MGI Symbol;Acc:MGI:1921582]	26.4177
St6galnac5	phosphatidylinositol glycan anchor biosynthesis, class K [Source:MGI Symbol;Acc:MGI:1913863]	26.156
Cdh2	cadherin 2 [Source:MGI Symbol;Acc:MGI:88355]	25.1769
Sh3bgr	SH3-binding domain glutamic acid-rich protein [Source:MGI Symbol;Acc:MGI:1354740]	24.9749
Acan	aggrecan [Source:MGI Symbol;Acc:MGI:99602]	24.7973
Nptx1	neuronal pentraxin 1 [Source:MGI Symbol;Acc:MGI:107811]	24.3729
Trib2	tribbles homolog 2 (Drosophila) [Source:MGI Symbol;Acc:MGI:2145021]	24.2491
Glipr1	KRR1, small subunit (SSU) processome component, homolog (yeast) [Source:MGI Symbol;Acc:MGI:1289274]	23.951
Tagln	proprotein convertase subtilisin/kexin type 7 [Source:MGI Symbol;Acc:MGI:107421]	22.5765
Angptl2	Ral GEF with PH domain and SH3 binding motif 1 [Source:MGI Symbol;Acc:MGI:1922008]	22.1858
Limch1	LIM and calponin homology domains 1 [Source:MGI Symbol;Acc:MGI:1924819]	21.9076
Emx2	empty spiracles homolog 2 (Drosophila) [Source:MGI Symbol;Acc:MGI:95388]	21.4757
Atp1a3	ATPase, Na+/K+ transporting, alpha 3 polypeptide [Source:MGI Symbol;Acc:MGI:88107]	21.2213
Irs1	insulin receptor substrate 1 [Source:MGI Symbol;Acc:MGI:99454]	20.5033
Sema3c	sema domain, immunoglobulin domain (Ig), short basic domain, secreted, (semaphorin) 3C [Source:MGI Symbol;Acc:MGI:107557]	20.247
Tnfrsf19	tumor necrosis factor receptor superfamily, member 19 [Source:MGI Symbol;Acc:MGI:1352474]	20.1702
Pcdh7	protocadherin 7 [Source:MGI Symbol;Acc:MGI:1860487]	20.1235
6330403K07Rik	RIKEN cDNA 6330403K07 gene [Source:MGI Symbol;Acc:MGI:1918001]	20.1195
Ism2	isthmin 2 homolog (zebrafish) [Source:MGI Symbol;Acc:MGI:2685110]	20.065
Gas6	growth arrest specific 6 [Source:MGI Symbol;Acc:MGI:95660]	19.6938
Unc5a	unc-5 homolog A (C. elegans) [Source:MGI Symbol;Acc:MGI:894682]	19.6928
Chst15	fibroblast growth factor receptor 2 [Source:MGI Symbol;Acc:MGI:95523]	19.2109
Olfml1	olfactomedin-like 1 [Source:MGI Symbol;Acc:MGI:2679264]	19.0883
Pdlim3	PDZ and LIM domain 3 [Source:MGI Symbol;Acc:MGI:1859274]	19.028
Fam196a	dedicator of cytokinesis 1 [Source:MGI Symbol;Acc:MGI:2429765]	18.6245
Maf	avian musculoaponeurotic fibrosarcoma (v-maf) AS42 oncogene homolog [Source:MGI Symbol;Acc:MGI:96909]	18.5455
C530008M17Rik	predicted gene 10430 [Source:MGI Symbol;Acc:MGI:3711274]	18.3597
Col6a1	collagen, type VI, alpha 1 [Source:MGI Symbol;Acc:MGI:88459]	18.1156
Slc6a4	solute carrier family 6 (neurotransmitter transporter, serotonin), member 4 [Source:MGI Symbol;Acc:MGI:96285]	18.0926
Gulp1	GULP, engulfment adaptor PTB domain containing 1 [Source:MGI Symbol;Acc:MGI:1920407]	17.9779
Smoc2	SPARC related modular calcium binding 2 [Source:MGI Symbol;Acc:MGI:1929881]	17.7753
Vcan	versican [Source:MGI Symbol;Acc:MGI:102889]	17.7657
Rhbdl3	rhomboid, veinlet-like 3 (Drosophila) [Source:MGI Symbol;Acc:MGI:2179276]	16.9724
Uchl1	predicted gene, 16832 [Source:MGI Symbol;Acc:MGI:4439756]	16.7185
Itga4	integrin alpha 4 [Source:MGI Symbol;Acc:MGI:96603]	16.6611
Adam23	a disintegrin and metallopeptidase domain 23 [Source:MGI Symbol;Acc:MGI:1345162]	16.4877
Gpc4	glypican 4 [Source:MGI Symbol;Acc:MGI:104902]	15.7938
Dbpht2	DNA binding protein with his-thr domain [Source:MGI Symbol;Acc:MGI:2679513]	15.6101
Crabp1	cellular retinoic acid binding protein I [Source:MGI Symbol;Acc:MGI:88490]	15.4045
Slc39a8	solute carrier family 39 (metal ion transporter), member 8 [Source:MGI Symbol;Acc:MGI:1914797]	15.3598
Pde4b	phosphodiesterase 4B, cAMP specific [Source:MGI Symbol;Acc:MGI:99557]	14.9626
Mpp3	membrane protein, palmitoylated 3 (MAGUK p55 subfamily member 3) [Source:MGI Symbol;Acc:MGI:1328354]	14.2026
Rasgrp2	RAS, guanyl releasing protein 2 [Source:MGI Symbol;Acc:MGI:1333849]	13.6596
Sox11	SRY-box containing gene 11 [Source:MGI Symbol;Acc:MGI:98359]	13.6537
Slitrk4	SLIT and NTRK-like family, member 4 [Source:MGI Symbol;Acc:MGI:2442509]	12.8946
Dchs1	dachsous 1 (Drosophila) [Source:MGI Symbol;Acc:MGI:2685011]	12.6716
Lrch2	leucine-rich repeats and calponin homology (CH) domain containing 2 [Source:MGI Symbol;Acc:MGI:2147870]	12.5831
B230314M03Rik	low density lipoprotein receptor-related protein 8, apolipoprotein e receptor [Source:MGI Symbol;Acc:MGI:1340044]	12.5483
Ephb2	Eph receptor B2 [Source:MGI Symbol;Acc:MGI:99611]	12.4518
Dlk1	delta-like 1 homolog (Drosophila) [Source:MGI Symbol;Acc:MGI:94900]	12.4364
Timp3	synapsin III [Source:MGI Symbol;Acc:MGI:1351334]	12.2615
Thbs1	thrombospondin 1 [Source:MGI Symbol;Acc:MGI:98737]	12.1877
Fndc1	fibronectin type III domain containing 1 [Source:MGI Symbol;Acc:MGI:1915905]	12.1851
Nefl	neurofilament, medium polypeptide [Source:MGI Symbol;Acc:MGI:97314]	12.1516
Aatk	apoptosis-associated tyrosine kinase [Source:MGI Symbol;Acc:MGI:1197518]	11.7098
Matn2	matrilin 2 [Source:MGI Symbol;Acc:MGI:109613]	11.67
Fbn1	fibrillin 1 [Source:MGI Symbol;Acc:MGI:95489]	11.562
Igfbp5	insulin-like growth factor binding protein 5 [Source:MGI Symbol;Acc:MGI:96440]	11.5498
Ccnd1	oral cancer overexpressed 1 [Source:MGI Symbol;Acc:MGI:1919534]	11.5272
Fras1	Fraser syndrome 1 homolog (human) [Source:MGI Symbol;Acc:MGI:2385368]	11.5223
Fundc2	coagulation factor VIII [Source:MGI Symbol;Acc:MGI:88383]	11.5116
Chrna4	cholinergic receptor, nicotinic, alpha polypeptide 4 [Source:MGI Symbol;Acc:MGI:87888]	11.4805
Zeb2	zinc finger E-box binding homeobox 2 [Source:MGI Symbol;Acc:MGI:1344407]	11.0963
Elfn1	leucine rich repeat and fibronectin type III, extracellular 1 [Source:MGI Symbol;Acc:MGI:2442479]	10.9951
Rgs10	regulator of G-protein signalling 10 [Source:MGI Symbol;Acc:MGI:1915115]	10.8342
Prss23	protease, serine, 23 [Source:MGI Symbol;Acc:MGI:1923703]	10.805
Rragd	Ras-related GTP binding D [Source:MGI Symbol;Acc:MGI:1098604]	10.7788
Sh3bgrl	SH3-binding domain glutamic acid-rich protein like [Source:MGI Symbol;Acc:MGI:1930849]	10.656
Col6a2	collagen, type VI, alpha 2 [Source:MGI Symbol;Acc:MGI:88460]	10.5419
Drd4	dopamine receptor D4 [Source:MGI Symbol;Acc:MGI:94926]	10.346
Pknox2	Pbx/knotted 1 homeobox 2 [Source:MGI Symbol;Acc:MGI:2445415]	10.3046
Fam84b	family with sequence similarity 84, member B [Source:MGI Symbol;Acc:MGI:3026924]	10.2356
Six2	sine oculis-related homeobox 2 homolog (Drosophila) [Source:MGI Symbol;Acc:MGI:102778]	10.2172
Adrb1	adrenergic receptor, beta 1 [Source:MGI Symbol;Acc:MGI:87937]	10.1134
Prl2a1	prolactin family 2, subfamily a, member 1 [Source:MGI Symbol;Acc:MGI:1861446]	10.1102
Gata6	GATA binding protein 6 [Source:MGI Symbol;Acc:MGI:107516]	9.98991
Kcnc1	potassium voltage gated channel, Shaw-related subfamily, member 1 [Source:MGI Symbol;Acc:MGI:96667]	9.98401
Alas2	apurinic/apyrimidinic endonuclease 2 [Source:MGI Symbol;Acc:MGI:1924872]	9.95884
Mtap1a	microtubule-associated protein 1 A [Source:MGI Symbol;Acc:MGI:1306776]	9.8829
Lpl	lipoprotein lipase [Source:MGI Symbol;Acc:MGI:96820]	9.8651
Gdpd2	glycerophosphodiester phosphodiesterase domain containing 2 [Source:MGI Symbol;Acc:MGI:1918834]	9.85628
Mest	mesoderm specific transcript [Source:MGI Symbol;Acc:MGI:96968]	9.81695
Rnf122	ring finger protein 122 [Source:MGI Symbol;Acc:MGI:1916117]	9.80023
Cdh23	cadherin 23 (otocadherin) [Source:MGI Symbol;Acc:MGI:1890219]	9.79182
Bcl11b	B cell leukemia/lymphoma 11B [Source:MGI Symbol;Acc:MGI:1929913]	9.71412
Fam59b	RIKEN cDNA 3110082J24 gene [Source:MGI Symbol;Acc:MGI:3641994]	9.69779
Gnai1	guanine nucleotide binding protein (G protein), alpha inhibiting 1 [Source:MGI Symbol;Acc:MGI:95771]	9.65455
Igfbp2	insulin-like growth factor binding protein 2 [Source:MGI Symbol;Acc:MGI:96437]	9.59856
Raet1c	histocompatibility 60b [Source:MGI Symbol;Acc:MGI:3649078]	9.59637
Ankrd1	ankyrin repeat domain 1 (cardiac muscle) [Source:MGI Symbol;Acc:MGI:1097717]	9.54404
Ecel1	endothelin converting enzyme-like 1 [Source:MGI Symbol;Acc:MGI:1343461]	9.31143
Wisp1	WNT1 inducible signaling pathway protein 1 [Source:MGI Symbol;Acc:MGI:1197008]	9.30926
Samd5	sterile alpha motif domain containing 5 [Source:MGI Symbol;Acc:MGI:2444815]	9.22776
Zswim6	zinc finger, SWIM domain containing 6 [Source:MGI Symbol;Acc:MGI:1914513]	9.19739
Pde4d	phosphodiesterase 4D, cAMP specific [Source:MGI Symbol;Acc:MGI:99555]	9.08051
Sema3g	sema domain, immunoglobulin domain (Ig), short basic domain, secreted, (semaphorin) 3G [Source:MGI Symbol;Acc:MGI:3041242]	8.98729
Hmgn3	high mobility group nucleosomal binding domain 3 [Source:MGI Symbol;Acc:MGI:2138069]	8.87603
Ctsc	cathepsin C [Source:MGI Symbol;Acc:MGI:109553]	8.84822
Xlr3b	X-linked lymphocyte-regulated 5A [Source:MGI Symbol;Acc:MGI:3574108]	8.78497
Lbh	limb-bud and heart [Source:MGI Symbol;Acc:MGI:1925139]	8.76295
Dnd1	WD repeat domain 55 [Source:MGI Symbol;Acc:MGI:1915186]	8.68989
Mrgpre	MAS-related GPR, member E [Source:MGI Symbol;Acc:MGI:2441884]	8.6847
Dpysl3	dihydropyrimidinase-like 3 [Source:MGI Symbol;Acc:MGI:1349762]	8.67285
Agbl2	ATP/GTP binding protein-like 2 [Source:MGI Symbol;Acc:MGI:2443254]	8.63934
Dtx4	deltex 4 homolog (Drosophila) [Source:MGI Symbol;Acc:MGI:2672905]	8.59655
Svep1	sushi, von Willebrand factor type A, EGF and pentraxin domain containing 1 [Source:MGI Symbol;Acc:MGI:1928849]	8.54068
Kalrn	kalirin, RhoGEF kinase [Source:MGI Symbol;Acc:MGI:2685385]	8.50666
Cybrd1	cytochrome b reductase 1 [Source:MGI Symbol;Acc:MGI:2654575]	8.46069
Tcfl5	collagen, type IX, alpha 3 [Source:MGI Symbol;Acc:MGI:894686]	8.40093
Xist	X (inactive)-specific transcript, antisense [Source:MGI Symbol;Acc:MGI:1336196]	8.3997
Gli2	GLI-Kruppel family member GLI2 [Source:MGI Symbol;Acc:MGI:95728]	8.32843
Ntrk2	neurotrophic tyrosine kinase, receptor, type 2 [Source:MGI Symbol;Acc:MGI:97384]	8.27182
Adora2a	adenosine A2a receptor [Source:MGI Symbol;Acc:MGI:99402]	8.26961
Vopp1	LanC (bacterial lantibiotic synthetase component C)-like 2 [Source:MGI Symbol;Acc:MGI:1919085]	8.18758
Kif1a	kinesin family member 1A [Source:MGI Symbol;Acc:MGI:108391]	8.16779
Chrm4	cholinergic receptor, muscarinic 4 [Source:MGI Symbol;Acc:MGI:88399]	8.16007
Pip5kl1	RIKEN cDNA 9430097D07 gene [Source:MGI Symbol;Acc:MGI:2441749]	8.15125
Pabpc4l	poly(A) binding protein, cytoplasmic 4-like [Source:MGI Symbol;Acc:MGI:3643087]	8.12208
Rnf207	isoprenylcysteine carboxyl methyltransferase [Source:MGI Symbol;Acc:MGI:1888594]	8.11663
Wnt5a	wingless-related MMTV integration site 5A [Source:MGI Symbol;Acc:MGI:98958]	8.09934
Fam131a	family with sequence similarity 131, member A [Source:MGI Symbol;Acc:MGI:1925658]	8.09271
Apcdd1	adenomatosis polyposis coli down-regulated 1 [Source:MGI Symbol;Acc:MGI:3513977]	8.01117
Armcx4	armadillo repeat containing, X-linked 4 [Source:MGI Symbol;Acc:MGI:2147887]	7.96634
Prrg1	proline rich Gla (G-carboxyglutamic acid) 1 [Source:MGI Symbol;Acc:MGI:1917364]	7.9436
Csdc2	cold shock domain containing C2, RNA binding [Source:MGI Symbol;Acc:MGI:2146027]	7.93811
Cacna2d1	calcium channel, voltage-dependent, alpha2/delta subunit 1 [Source:MGI Symbol;Acc:MGI:88295]	7.92832
Cd74	CD74 antigen (invariant polypeptide of major histocompatibility complex, class II antigen-associated) [Source:MGI Symbol;Acc:MGI:96534]	7.77218
Anxa8	uncharacterized protein LOC105518 [Source:RefSeq peptide;Acc:NP_001238772]	7.76235
Efna5	ephrin A5 [Source:MGI Symbol;Acc:MGI:107444]	7.75825
Ephb1	Eph receptor B1 [Source:MGI Symbol;Acc:MGI:1096337]	7.70365
Krt20	keratin 20 [Source:MGI Symbol;Acc:MGI:1914059]	7.66989
Artn	artemin [Source:MGI Symbol;Acc:MGI:1333791]	7.50916
Stxbp6	syntaxin binding protein 6 (amisyn) [Source:MGI Symbol;Acc:MGI:2384963]	7.5047
Prkaa2	protein kinase, AMP-activated, alpha 2 catalytic subunit [Source:MGI Symbol;Acc:MGI:1336173]	7.4609
Rgnef	Rho-guanine nucleotide exchange factor [Source:MGI Symbol;Acc:MGI:1346016]	7.44405
Ncs1	neuronal calcium sensor 1 [Source:MGI Symbol;Acc:MGI:109166]	7.43445
Elfn2	leucine rich repeat and fibronectin type III, extracellular 2 [Source:MGI Symbol;Acc:MGI:3608416]	7.33657
Tgfb3	tubulin tyrosine ligase-like family, member 5 [Source:MGI Symbol;Acc:MGI:2443657]	7.28614
Tesc	tescalcin [Source:MGI Symbol;Acc:MGI:1930803]	7.28579
Itga11	integrin alpha 11 [Source:MGI Symbol;Acc:MGI:2442114]	7.28225
Lbp	lipopolysaccharide binding protein [Source:MGI Symbol;Acc:MGI:1098776]	7.22403
Nradd	neurotrophin receptor associated death domain [Source:MGI Symbol;Acc:MGI:1914419]	7.19
Bex2	brain expressed X-linked 2 [Source:MGI Symbol;Acc:MGI:1338017]	7.16095
Prkcg	protein kinase C, gamma [Source:MGI Symbol;Acc:MGI:97597]	7.14576
Adamts8	a disintegrin-like and metallopeptidase (reprolysin type) with thrombospondin type 1 motif, 8 [Source:MGI Symbol;Acc:MGI:1353468]	7.01623
Zfp629	zinc finger protein 629 [Source:MGI Symbol;Acc:MGI:2444524]	6.96231
Ak5	zinc finger, ZZ domain containing 3 [Source:MGI Symbol;Acc:MGI:1920453]	6.9347
Adam22	a disintegrin and metallopeptidase domain 22 [Source:MGI Symbol;Acc:MGI:1340046]	6.9207
Mfap3l	microfibrillar-associated protein 3-like [Source:MGI Symbol;Acc:MGI:1918556]	6.89929
Cntfr	ciliary neurotrophic factor receptor [Source:MGI Symbol;Acc:MGI:99605]	6.8724
Zfp467	zinc finger protein 467 [Source:MGI Symbol;Acc:MGI:1916160]	6.75399
Bmp2	bone morphogenetic protein 2 [Source:MGI Symbol;Acc:MGI:88177]	6.70797
Mbnl1	muscleblind-like 1 (Drosophila) [Source:MGI Symbol;Acc:MGI:1928482]	6.69388
Clstn1	calsyntenin 1 [Source:MGI Symbol;Acc:MGI:1929895]	6.57362
Lass1	growth differentiation factor 1 [Source:MGI Symbol;Acc:MGI:95683]	6.55824
Gpc3	glypican 3 [Source:MGI Symbol;Acc:MGI:104903]	6.55699
Gdf1	growth differentiation factor 1 [Source:MGI Symbol;Acc:MGI:95683]	6.50856
Alcam	activated leukocyte cell adhesion molecule [Source:MGI Symbol;Acc:MGI:1313266]	6.49856
Enox1	ecto-NOX disulfide-thiol exchanger 1 [Source:MGI Symbol;Acc:MGI:2444896]	6.46727
Col12a1	collagen, type XII, alpha 1 [Source:MGI Symbol;Acc:MGI:88448]	6.44798
Pdzrn3	PDZ domain containing RING finger 3 [Source:MGI Symbol;Acc:MGI:1933157]	6.43914
Dusp4	dual specificity phosphatase 4 [Source:MGI Symbol;Acc:MGI:2442191]	6.43306
Ltc4s	leukotriene C4 synthase [Source:MGI Symbol;Acc:MGI:107498]	6.4299
Avil	advillin [Source:MGI Symbol;Acc:MGI:1333798]	6.38346
Kcnh3	potassium voltage-gated channel, subfamily H (eag-related), member 3 [Source:MGI Symbol;Acc:MGI:1341723]	6.37397
Nsg1	syntaxin 18 [Source:MGI Symbol;Acc:MGI:1918366]	6.34957
Zdhhc15	zinc finger, DHHC domain containing 15 [Source:MGI Symbol;Acc:MGI:1915336]	6.32494
Prune2	prune homolog 2 (Drosophila) [Source:MGI Symbol;Acc:MGI:1925004]	6.26077
Lama1	laminin, alpha 1 [Source:MGI Symbol;Acc:MGI:99892]	6.25668
Ghr	growth hormone receptor [Source:MGI Symbol;Acc:MGI:95708]	6.25604
Synpo2	synaptopodin 2 [Source:MGI Symbol;Acc:MGI:2153070]	6.19573
Flrt1	MACRO domain containing 1 [Source:MGI Symbol;Acc:MGI:2147583]	6.19267
Foxo6	forkhead box O6 [Source:MGI Symbol;Acc:MGI:2676586]	6.18794
Leprel1	predicted gene 4524 [Source:MGI Symbol;Acc:MGI:3782709]	6.15513
Zdbf2	No description	6.13201
Nxph4	neurexophilin 4 [Source:MGI Symbol;Acc:MGI:1336197]	6.10141
Mme	membrane metallo endopeptidase [Source:MGI Symbol;Acc:MGI:97004]	6.06123
Klf14	Kruppel-like factor 14 [Source:MGI Symbol;Acc:MGI:3577024]	6.06042
Fam115c	family with sequence similarity 115, member C [Source:MGI Symbol;Acc:MGI:2385258]	6.04409
Rtn4rl1	reticulon 4 receptor-like 1 [Source:MGI Symbol;Acc:MGI:2661375]	6.01219
Ednrb	endothelin receptor type B [Source:MGI Symbol;Acc:MGI:102720]	5.99893
Lrrc10b	leucine rich repeat containing 10B [Source:MGI Symbol;Acc:MGI:2685551]	5.96478
Cyp26b1	cytochrome P450, family 26, subfamily b, polypeptide 1 [Source:MGI Symbol;Acc:MGI:2176159]	5.95738
Adamts2	predicted gene 12198 [Source:MGI Symbol;Acc:MGI:3650407]	5.95262
Nrp1	neuropilin 1 [Source:MGI Symbol;Acc:MGI:106206]	5.91084
Nhsl2	NHS-like 2 [Source:MGI Symbol;Acc:MGI:3645090]	5.88545
Zfyve28	zinc finger, FYVE domain containing 28 [Source:MGI Symbol;Acc:MGI:2684992]	5.86062
Ece1	endothelin converting enzyme 1 [Source:MGI Symbol;Acc:MGI:1101357]	5.85666
Ryr2	ryanodine receptor 2, cardiac [Source:MGI Symbol;Acc:MGI:99685]	5.84941
Sepp1	selenoprotein P, plasma, 1 [Source:MGI Symbol;Acc:MGI:894288]	5.84363
Reep2	receptor accessory protein 2 [Source:MGI Symbol;Acc:MGI:2385070]	5.82033
Sox8	SRY-box containing gene 8 [Source:MGI Symbol;Acc:MGI:98370]	5.81628
Ltbp1	latent transforming growth factor beta binding protein 1 [Source:MGI Symbol;Acc:MGI:109151]	5.80859
Gm15675	predicted gene 15674 [Source:MGI Symbol;Acc:MGI:3783116]	5.79911
Kcnq5	potassium voltage-gated channel, subfamily Q, member 5 [Source:MGI Symbol;Acc:MGI:1924937]	5.78387
Pbx1	pre B cell leukemia homeobox 1 [Source:MGI Symbol;Acc:MGI:97495]	5.78101
Camk1d	calcium/calmodulin-dependent protein kinase ID [Source:MGI Symbol;Acc:MGI:2442190]	5.77504
Bmp6	bone morphogenetic protein 6 [Source:MGI Symbol;Acc:MGI:88182]	5.71988
Nat8l	N-acetyltransferase 8-like [Source:MGI Symbol;Acc:MGI:2447776]	5.71118
B3galnt1	UDP-GalNAc:betaGlcNAc beta 1,3-galactosaminyltransferase, polypeptide 1 [Source:MGI Symbol;Acc:MGI:1349405]	5.61962
Cdo1	cysteine dioxygenase 1, cytosolic [Source:MGI Symbol;Acc:MGI:105925]	5.60569
Scara5	scavenger receptor class A, member 5 (putative) [Source:MGI Symbol;Acc:MGI:1918395]	5.58409
AC152451.1	uncharacterized protein LOC268595 [Source:RefSeq peptide;Acc:NP_001239437]	5.54141
Dpysl4	dihydropyrimidinase-like 4 [Source:MGI Symbol;Acc:MGI:1349764]	5.53408
D830030K20Rik	predicted gene 17188 [Source:MGI Symbol;Acc:MGI:4938015]	5.51052
Frk	fyn-related kinase [Source:MGI Symbol;Acc:MGI:103265]	5.49585
Tyro3	TYRO3 protein tyrosine kinase 3 [Source:MGI Symbol;Acc:MGI:104294]	5.49444
Cntn2	contactin 2 [Source:MGI Symbol;Acc:MGI:104518]	5.48357
Lypd6b	LY6/PLAUR domain containing 6B [Source:MGI Symbol;Acc:MGI:1919147]	5.42876
Chst8	carbohydrate (N-acetylgalactosamine 4-0) sulfotransferase 8 [Source:MGI Symbol;Acc:MGI:1916197]	5.42171
Epb4.1l3	erythrocyte protein band 4.1-like 3 [Source:MGI Symbol;Acc:MGI:103008]	5.39797
Baiap3	BAI1-associated protein 3 [Source:MGI Symbol;Acc:MGI:2685783]	5.36213
Grik3	glutamate receptor, ionotropic, kainate 3 [Source:MGI Symbol;Acc:MGI:95816]	5.35589
Cxxc5	CXXC finger 5 [Source:MGI Symbol;Acc:MGI:1914643]	5.2941
Npnt	nephronectin [Source:MGI Symbol;Acc:MGI:2148811]	5.28956
Sfrp5	secreted frizzled-related sequence protein 5 [Source:MGI Symbol;Acc:MGI:1860298]	5.26033
Enox2	ecto-NOX disulfide-thiol exchanger 2 [Source:MGI Symbol;Acc:MGI:2384799]	5.25598
Tspan2	RIKEN cDNA 2410057H14 gene [Source:MGI Symbol;Acc:MGI:1925741]	5.24826
Peli2	pellino 2 [Source:MGI Symbol;Acc:MGI:1891445]	5.2119
Hes1	hairy and enhancer of split 1 (Drosophila) [Source:MGI Symbol;Acc:MGI:104853]	5.20829
Galnt14	No description	5.1926
H19	H19 fetal liver mRNA [Source:MGI Symbol;Acc:MGI:95891]	5.19054
Slc17a9	solute carrier family 17, member 9 [Source:MGI Symbol;Acc:MGI:1919107]	5.15409
Lypd6	LY6/PLAUR domain containing 6 [Source:MGI Symbol;Acc:MGI:2443848]	5.10131
Slit2	slit homolog 2 (Drosophila) [Source:MGI Symbol;Acc:MGI:1315205]	5.10061
Nrp2	neuropilin 2 [Source:MGI Symbol;Acc:MGI:1100492]	5.09162
Mdk	cholinergic receptor, muscarinic 4 [Source:MGI Symbol;Acc:MGI:88399]	4.99552
Boc	biregional cell adhesion molecule-related/down-regulated by oncogenes (Cdon) binding protein [Source:MGI Symbol;Acc:MGI:2151153]	4.98704
Rab32	RAB32, member RAS oncogene family [Source:MGI Symbol;Acc:MGI:1915094]	4.97642
Gprasp1	armadillo repeat containing, X-linked 5 [Source:MGI Symbol;Acc:MGI:2148026]	4.97589
Mn1	meningioma 1 [Source:MGI Symbol;Acc:MGI:1261813]	4.96966
Gm17067	predicted gene 17067 [Source:MGI Symbol;Acc:MGI:4937894]	4.9585
Bach2	BTB and CNC homology 2 [Source:MGI Symbol;Acc:MGI:894679]	4.95701
Col7a1	collagen, type VII, alpha 1 [Source:MGI Symbol;Acc:MGI:88462]	4.95583
Sfrp1	secreted frizzled-related protein 1 [Source:MGI Symbol;Acc:MGI:892014]	4.94738
Gprc5b	IQ motif containing K [Source:MGI Symbol;Acc:MGI:3612188]	4.9092
Chd3	chromodomain helicase DNA binding protein 3 [Source:MGI Symbol;Acc:MGI:1344395]	4.89195
Pth1r	parathyroid hormone 1 receptor [Source:MGI Symbol;Acc:MGI:97801]	4.87177
Nfix	nuclear factor I/X [Source:MGI Symbol;Acc:MGI:97311]	4.80859
Fut9	fucosyltransferase 9 [Source:MGI Symbol;Acc:MGI:1330859]	4.79485
6030419C18Rik	RIKEN cDNA 6030419C18 gene [Source:MGI Symbol;Acc:MGI:2442108]	4.78424
Dagla	diacylglycerol lipase, alpha [Source:MGI Symbol;Acc:MGI:2677061]	4.78102
Ptges	prostaglandin E synthase [Source:MGI Symbol;Acc:MGI:1927593]	4.7622
Tgfb2	transforming growth factor, beta 2 [Source:MGI Symbol;Acc:MGI:98726]	4.73131
Rnd3	Rho family GTPase 3 [Source:MGI Symbol;Acc:MGI:1921444]	4.72776
Shank2	SH3/ankyrin domain gene 2 [Source:MGI Symbol;Acc:MGI:2671987]	4.70204
C77370	expressed sequence C77370 [Source:MGI Symbol;Acc:MGI:2148050]	4.68496
Crispld2	predicted gene 20388 [Source:MGI Symbol;Acc:MGI:5141853]	4.67925
Syt7	synaptotagmin VII [Source:MGI Symbol;Acc:MGI:1859545]	4.66808
Eci1	enoyl-Coenzyme A delta isomerase 1 [Source:MGI Symbol;Acc:MGI:94871]	4.66652
Wnt7b	wingless-related MMTV integration site 7B [Source:MGI Symbol;Acc:MGI:98962]	4.65541
Syngr3	synaptogyrin 3 [Source:MGI Symbol;Acc:MGI:1341881]	4.63956
Arhgef26	Rho guanine nucleotide exchange factor (GEF) 26 [Source:MGI Symbol;Acc:MGI:1918053]	4.63389
Dll4	predicted gene 14207 [Source:MGI Symbol;Acc:MGI:3649550]	4.60977
Gfra2	glial cell line derived neurotrophic factor family receptor alpha 2 [Source:MGI Symbol;Acc:MGI:1195462]	4.60185
Dab2	disabled homolog 2 (Drosophila) [Source:MGI Symbol;Acc:MGI:109175]	4.5844
Rap1gap2	RAP1 GTPase activating protein 2 [Source:MGI Symbol;Acc:MGI:3028623]	4.57184
Tspyl5	testis-specific protein, Y-encoded-like 5 [Source:MGI Symbol;Acc:MGI:2442458]	4.56869
Arc	activity regulated cytoskeletal-associated protein [Source:MGI Symbol;Acc:MGI:88067]	4.5522
Naprt1	nicotinate phosphoribosyltransferase domain containing 1 [Source:MGI Symbol;Acc:MGI:2442664]	4.55033
Hs6st2	heparan sulfate 6-O-sulfotransferase 2 [Source:MGI Symbol;Acc:MGI:1354959]	4.54039
Nmb	neuromedin B [Source:MGI Symbol;Acc:MGI:1915289]	4.53103
Sh3kbp1	SH3-domain kinase binding protein 1 [Source:MGI Symbol;Acc:MGI:1889583]	4.5139
Rtn4r	reticulon 4 receptor [Source:MGI Symbol;Acc:MGI:2136886]	4.48664
Pfkfb3	No description	4.48398
Cadm1	cell adhesion molecule 1 [Source:MGI Symbol;Acc:MGI:1889272]	4.45034
Tgfb1i1	transforming growth factor beta 1 induced transcript 1 [Source:MGI Symbol;Acc:MGI:102784]	4.44591
Fgf18	fibroblast growth factor 18 [Source:MGI Symbol;Acc:MGI:1277980]	4.44506
Gas1	growth arrest specific 1 [Source:MGI Symbol;Acc:MGI:95655]	4.43536
Fgfr3	fibroblast growth factor receptor 3 [Source:MGI Symbol;Acc:MGI:95524]	4.43024
Kbtbd11	kelch repeat and BTB (POZ) domain containing 11 [Source:MGI Symbol;Acc:MGI:1922151]	4.40632
Nexn	nexilin [Source:MGI Symbol;Acc:MGI:1916060]	4.39961
Mllt3	myeloid/lymphoid or mixed-lineage leukemia (trithorax homolog, Drosophila); translocated to, 3 [Source:MGI Symbol;Acc:MGI:1917372]	4.39004
Rgs5	regulator of G-protein signaling 5 [Source:MGI Symbol;Acc:MGI:1098434]	4.38294
Zhx2	zinc fingers and homeoboxes 2 [Source:MGI Symbol;Acc:MGI:2683087]	4.36624
Gata1	GATA binding protein 1 [Source:MGI Symbol;Acc:MGI:95661]	4.35617
Sema5b	sema domain, seven thrombospondin repeats (type 1 and type 1-like), transmembrane domain (TM) and short cytoplasmic domain, (semaphorin) 5B [Source:MGI Symbol;Acc:MGI:107555]	4.3331
Prkd1	protein kinase D1 [Source:MGI Symbol;Acc:MGI:99879]	4.33213
Nox4	NADPH oxidase 4 [Source:MGI Symbol;Acc:MGI:1354184]	4.32171
Ddah2	dimethylarginine dimethylaminohydrolase 2 [Source:MGI Symbol;Acc:MGI:1859016]	4.31706
Kif5c	kinesin family member 5C [Source:MGI Symbol;Acc:MGI:1098269]	4.28994
Sdc2	syndecan 2 [Source:MGI Symbol;Acc:MGI:1349165]	4.24702
Vegfa	vascular endothelial growth factor A [Source:MGI Symbol;Acc:MGI:103178]	4.22432
Nkd2	naked cuticle 2 homolog (Drosophila) [Source:MGI Symbol;Acc:MGI:1919543]	4.21603
3830431G21Rik	RIKEN cDNA 3830431G21 gene [Source:MGI Symbol;Acc:MGI:3036228]	4.21146
Syp	synaptophysin [Source:MGI Symbol;Acc:MGI:98467]	4.20193
Zfp941	zinc finger protein 941 [Source:MGI Symbol;Acc:MGI:3039601]	4.16738
Tubb4a	tubulin, beta 4A class IVA [Source:MGI Symbol;Acc:MGI:107848]	4.15019
Jmjd8	jumonji domain containing 8 [Source:MGI Symbol;Acc:MGI:1919356]	4.11424
Ptplad2	cDNA sequence BC057079 [Source:MGI Symbol;Acc:MGI:2676921]	4.10816
Fat3	FAT tumor suppressor homolog 3 (Drosophila) [Source:MGI Symbol;Acc:MGI:2444314]	4.10058
Nfib	nuclear factor I/B [Source:MGI Symbol;Acc:MGI:103188]	4.09794
Lrrn2	leucine rich repeat protein 2, neuronal [Source:MGI Symbol;Acc:MGI:106037]	4.09738
Aoc3	amine oxidase, copper containing 3 [Source:MGI Symbol;Acc:MGI:1306797]	4.09641
Lass6	LAG1 homolog, ceramide synthase 6 [Source:MGI Symbol;Acc:MGI:2442564]	4.09242
Zfp827	zinc finger protein 827 [Source:MGI Symbol;Acc:MGI:2444807]	4.07855
Nat2	N-acetyltransferase 2 (arylamine N-acetyltransferase) [Source:MGI Symbol;Acc:MGI:109201]	4.077
Hmgb3	high mobility group box 3 [Source:MGI Symbol;Acc:MGI:1098219]	4.05329
Fgfr2	fibroblast growth factor receptor 2 [Source:MGI Symbol;Acc:MGI:95523]	4.04661
Necab3	N-terminal EF-hand calcium binding protein 3 [Source:MGI Symbol;Acc:MGI:1861721]	4.04024
Synm	synemin, intermediate filament protein [Source:MGI Symbol;Acc:MGI:2661187]	4.01896
Ldoc1	leucine zipper, down-regulated in cancer 1 [Source:MGI Symbol;Acc:MGI:2685212]	3.95146
Aldoc	aldolase C, fructose-bisphosphate [Source:MGI Symbol;Acc:MGI:101863]	3.94357
Tspan18	tetraspanin 18 [Source:MGI Symbol;Acc:MGI:1917186]	3.89841
Pcsk6	predicted gene 20684 [Source:MGI Symbol;Acc:MGI:5313131]	3.89442
Fam114a1	family with sequence similarity 114, member A1 [Source:MGI Symbol;Acc:MGI:1915553]	3.89235
Stard10	START domain containing 10 [Source:MGI Symbol;Acc:MGI:1860093]	3.8905
Clmn	calmin [Source:MGI Symbol;Acc:MGI:2136957]	3.88695
Magee1	melanoma antigen, family E, 1 [Source:MGI Symbol;Acc:MGI:2148149]	3.88205
Kctd1	potassium channel tetramerisation domain containing 1 [Source:MGI Symbol;Acc:MGI:1918269]	3.87549
Wt1	Wilms tumor 1 homolog [Source:MGI Symbol;Acc:MGI:98968]	3.87136
Meis1	Meis homeobox 1 [Source:MGI Symbol;Acc:MGI:104717]	3.852
Ehd2	EH-domain containing 2 [Source:MGI Symbol;Acc:MGI:2154274]	3.84515
Nqo1	NAD(P)H dehydrogenase, quinone 1 [Source:MGI Symbol;Acc:MGI:103187]	3.83118
Rims3	regulating synaptic membrane exocytosis 3 [Source:MGI Symbol;Acc:MGI:2443331]	3.82847
8430427H17Rik	RIKEN cDNA 8430427H17 gene [Source:MGI Symbol;Acc:MGI:1918765]	3.82512
Fam69b	predicted gene 20532 [Source:MGI Symbol;Acc:MGI:5141997]	3.82469
Klhdc8a	kelch domain containing 8A [Source:MGI Symbol;Acc:MGI:2442630]	3.8206
Pls3	plastin 3 (T-isoform) [Source:MGI Symbol;Acc:MGI:104807]	3.81019
Stc2	stanniocalcin 2 [Source:MGI Symbol;Acc:MGI:1316731]	3.80634
Arhgap20	Rho GTPase activating protein 20 [Source:MGI Symbol;Acc:MGI:2445175]	3.804
Col23a1	collagen, type XXIII, alpha 1 [Source:MGI Symbol;Acc:MGI:2653243]	3.80061
Scx	block of proliferation 1 [Source:MGI Symbol;Acc:MGI:1334460]	3.78762
Fam174b	RIKEN cDNA A830073O21 gene [Source:MGI Symbol;Acc:MGI:2443692]	3.76031
Prr7	proline rich 7 (synaptic) [Source:MGI Symbol;Acc:MGI:3487246]	3.75039
Anp32a	acidic (leucine-rich) nuclear phosphoprotein 32 family, member A [Source:MGI Symbol;Acc:MGI:108447]	3.74778
Nxn	nucleoredoxin [Source:MGI Symbol;Acc:MGI:109331]	3.7357
Fhl1	four and a half LIM domains 1 [Source:MGI Symbol;Acc:MGI:1298387]	3.72231
Mdga1	MAM domain containing glycosylphosphatidylinositol anchor 1 [Source:MGI Symbol;Acc:MGI:1922012]	3.71093
Bex4	brain expressed gene 4 [Source:MGI Symbol;Acc:MGI:3606746]	3.70558
Gm10567	predicted gene 10567 [Source:MGI Symbol;Acc:MGI:3642215]	3.7021
Pax6	Pax6 opposite strand transcript 1 [Source:MGI Symbol;Acc:MGI:3028033]	3.66534
Bcl2	B cell leukemia/lymphoma 2 [Source:MGI Symbol;Acc:MGI:88138]	3.6565
Ppp2r2c	protein phosphatase 2 (formerly 2A), regulatory subunit B (PR 52), gamma isoform [Source:MGI Symbol;Acc:MGI:2442660]	3.64847
Asphd2	aspartate beta-hydroxylase domain containing 2 [Source:MGI Symbol;Acc:MGI:1920148]	3.63468
Pde8b	phosphodiesterase 8B [Source:MGI Symbol;Acc:MGI:2443999]	3.6252
Psd3	pleckstrin and Sec7 domain containing 3 [Source:MGI Symbol;Acc:MGI:1918215]	3.61989
Loxl2	lysyl oxidase-like 2 [Source:MGI Symbol;Acc:MGI:2137913]	3.59492
Gjc1	gap junction protein, gamma 1 [Source:MGI Symbol;Acc:MGI:95718]	3.58212
Gnaz	rhabdoid tumor deletion region gene 1 [Source:MGI Symbol;Acc:MGI:1918486]	3.57861
Abcc8	ATP-binding cassette, sub-family C (CFTR/MRP), member 8 [Source:MGI Symbol;Acc:MGI:1352629]	3.57482
Slit1	slit homolog 1 (Drosophila) [Source:MGI Symbol;Acc:MGI:1315203]	3.564
Bambi	BMP and activin membrane-bound inhibitor, homolog (Xenopus laevis) [Source:MGI Symbol;Acc:MGI:1915260]	3.55404
Pappa	pregnancy-associated plasma protein A [Source:MGI Symbol;Acc:MGI:97479]	3.55267
Bend6	BEN domain containing 6 [Source:MGI Symbol;Acc:MGI:2444572]	3.52421
Nkd1	naked cuticle 1 homolog (Drosophila) [Source:MGI Symbol;Acc:MGI:2135954]	3.52104
Cend1	cell cycle exit and neuronal differentiation 1 [Source:MGI Symbol;Acc:MGI:1929898]	3.5141
Chst2	carbohydrate sulfotransferase 2 [Source:MGI Symbol;Acc:MGI:1891160]	3.49193
Id3	inhibitor of DNA binding 3 [Source:MGI Symbol;Acc:MGI:96398]	3.48135
Cdh4	cadherin 4 [Source:MGI Symbol;Acc:MGI:99218]	3.47845
Ptprg	protein tyrosine phosphatase, receptor type, G [Source:MGI Symbol;Acc:MGI:97814]	3.47677
Spock2	sparc/osteonectin, cwcv and kazal-like domains proteoglycan 2 [Source:MGI Symbol;Acc:MGI:1891351]	3.47609
Vav3	vav 3 oncogene [Source:MGI Symbol;Acc:MGI:1888518]	3.46255
Thsd4	thrombospondin, type I, domain containing 4 [Source:MGI Symbol;Acc:MGI:2672033]	3.45539
Ldlrad3	low density lipoprotein receptor class A domain containing 3 [Source:MGI Symbol;Acc:MGI:2138856]	3.44428
Slco3a1	solute carrier organic anion transporter family, member 3a1 [Source:MGI Symbol;Acc:MGI:1351867]	3.44339
C530028O21Rik	RIKEN cDNA C530028O21 gene [Source:MGI Symbol;Acc:MGI:2441908]	3.44156
Rpp25	ribonuclease P 25 subunit (human) [Source:MGI Symbol;Acc:MGI:2143151]	3.41579
Fhod3	formin homology 2 domain containing 3 [Source:MGI Symbol;Acc:MGI:1925847]	3.41325
Jag1	jagged 1 [Source:MGI Symbol;Acc:MGI:1095416]	3.40917
Cnih2	Yip1 interacting factor homolog A (S. cerevisiae) [Source:MGI Symbol;Acc:MGI:1915340]	3.40895
Zfp418	zinc finger protein 418 [Source:MGI Symbol;Acc:MGI:2444763]	3.40491
Wnt4	wingless-related MMTV integration site 4 [Source:MGI Symbol;Acc:MGI:98957]	3.39164
B4galt2	solute carrier family 6 (neurotransmitter transporter, glycine), member 9 [Source:MGI Symbol;Acc:MGI:95760]	3.39095
Pir	pirin [Source:MGI Symbol;Acc:MGI:1916906]	3.38497
Htra1	fibroblast growth factor receptor 2 [Source:MGI Symbol;Acc:MGI:95523]	3.38424
Uck2	uridine-cytidine kinase 2 [Source:MGI Symbol;Acc:MGI:1931744]	3.36721
Grb14	growth factor receptor bound protein 14 [Source:MGI Symbol;Acc:MGI:1355324]	3.35598
Lipo1	lipase, member O4 [Source:MGI Symbol;Acc:MGI:3779637]	3.35491
Brsk1	BR serine/threonine kinase 1 [Source:MGI Symbol;Acc:MGI:2685946]	3.35398
Sorcs2	sortilin-related VPS10 domain containing receptor 2 [Source:MGI Symbol;Acc:MGI:1932289]	3.34694
Iqsec2	IQ motif and Sec7 domain 2 [Source:MGI Symbol;Acc:MGI:3528396]	3.33405
Accn2	amiloride-sensitive cation channel 2, neuronal [Source:MGI Symbol;Acc:MGI:1194915]	3.32785
Mcam	melanoma cell adhesion molecule [Source:MGI Symbol;Acc:MGI:1933966]	3.31493
Mt2	metallothionein 2 [Source:MGI Symbol;Acc:MGI:97172]	3.3017
Ext1	exostoses (multiple) 1 [Source:MGI Symbol;Acc:MGI:894663]	3.28106
Ppm1l	protein phosphatase 1 (formerly 2C)-like [Source:MGI Symbol;Acc:MGI:2139740]	3.25895
Foxf1a	predicted gene 20388 [Source:MGI Symbol;Acc:MGI:5141853]	3.25606
Ap1s2	adaptor-related protein complex 1, sigma 2 subunit [Source:MGI Symbol;Acc:MGI:1889383]	3.25026
Nes	nestin [Source:MGI Symbol;Acc:MGI:101784]	3.23527
Arxes2	adipocyte-related X-chromosome expressed sequence 2 [Source:MGI Symbol;Acc:MGI:1924226]	3.22558
Mmp17	No description	3.22457
Raver2	ribonucleoprotein, PTB-binding 2 [Source:MGI Symbol;Acc:MGI:2443623]	3.22411
Tspan5	tetraspanin 5 [Source:MGI Symbol;Acc:MGI:1928096]	3.21317
Colec12	collectin sub-family member 12 [Source:MGI Symbol;Acc:MGI:2152907]	3.21179
Hic1	hypermethylated in cancer 1 [Source:MGI Symbol;Acc:MGI:1338010]	3.19746
2310014L17Rik	RIKEN cDNA 2310014L17 gene [Source:MGI Symbol;Acc:MGI:1924198]	3.18619
Cebpa	CCAAT/enhancer binding protein (C/EBP), alpha [Source:MGI Symbol;Acc:MGI:99480]	3.17933
Ret	ret proto-oncogene [Source:MGI Symbol;Acc:MGI:97902]	3.17184
Adk	adenosine kinase [Source:MGI Symbol;Acc:MGI:87930]	3.16961
Prkar2a	protein kinase, cAMP dependent regulatory, type II alpha [Source:MGI Symbol;Acc:MGI:108025]	3.15583
Id2	inhibitor of DNA binding 2 [Source:MGI Symbol;Acc:MGI:96397]	3.14664
Fads2	fatty acid desaturase 2 [Source:MGI Symbol;Acc:MGI:1930079]	3.13885
Pmp22	peripheral myelin protein 22 [Source:MGI Symbol;Acc:MGI:97631]	3.13118
Dbn1	drebrin 1 [Source:MGI Symbol;Acc:MGI:1931838]	3.12157
Crim1	cysteine rich transmembrane BMP regulator 1 (chordin like) [Source:MGI Symbol;Acc:MGI:1354756]	3.10551
Bcl6	B cell leukemia/lymphoma 6 [Source:MGI Symbol;Acc:MGI:107187]	3.10119
Anxa6	annexin A6 [Source:MGI Symbol;Acc:MGI:88255]	3.09643
Slc9a3r2	solute carrier family 9 (sodium/hydrogen exchanger), member 3 regulator 2 [Source:MGI Symbol;Acc:MGI:1890662]	3.07614
Gamt	guanidinoacetate methyltransferase [Source:MGI Symbol;Acc:MGI:1098221]	3.0581
Slc7a6	solute carrier family 7 (cationic amino acid transporter, y+ system), member 6 [Source:MGI Symbol;Acc:MGI:2142598]	3.0445
Tanc1	tetratricopeptide repeat, ankyrin repeat and coiled-coil containing 1 [Source:MGI Symbol;Acc:MGI:1914110]	3.03838
Phgdh	3-phosphoglycerate dehydrogenase [Source:MGI Symbol;Acc:MGI:1355330]	3.02028
Efnb2	ephrin B2 [Source:MGI Symbol;Acc:MGI:105097]	3.00166
Hdac4	histone deacetylase 4 [Source:MGI Symbol;Acc:MGI:3036234]	2.99523
Fgfbp1	fibroblast growth factor binding protein 1 [Source:MGI Symbol;Acc:MGI:1096350]	2.99146
Zfp462	zinc finger protein 462 [Source:MGI Symbol;Acc:MGI:107690]	2.98939
Lhfp	lipoma HMGIC fusion partner [Source:MGI Symbol;Acc:MGI:1920048]	2.98727
Mxra7	matrix-remodelling associated 7 [Source:MGI Symbol;Acc:MGI:1914872]	2.98043
Galnt10	RIKEN cDNA 4933424L21 gene [Source:MGI Symbol;Acc:MGI:1926012]	2.95696
Aff3	AF4/FMR2 family, member 3 [Source:MGI Symbol;Acc:MGI:106927]	2.94951
Kctd15	potassium channel tetramerisation domain containing 15 [Source:MGI Symbol;Acc:MGI:2385276]	2.94248
Slc44a1	solute carrier family 44, member 1 [Source:MGI Symbol;Acc:MGI:2140592]	2.91843
Glipr2	GLI pathogenesis-related 2 [Source:MGI Symbol;Acc:MGI:1917770]	2.91354
Sox4	SRY-box containing gene 4 [Source:MGI Symbol;Acc:MGI:98366]	2.91149
Atxn1	ataxin 1 [Source:MGI Symbol;Acc:MGI:104783]	2.91104
Sec24d	Sec24 related gene family, member D (S. cerevisiae) [Source:MGI Symbol;Acc:MGI:1916858]	2.89307
Zim1	zinc finger, imprinted 1 [Source:MGI Symbol;Acc:MGI:1341879]	2.88265
Prr5l	proline rich 5 like [Source:MGI Symbol;Acc:MGI:1919696]	2.88232
Rnf149	predicted gene 15832 [Source:MGI Symbol;Acc:MGI:3834078]	2.8808
Lrrc4	staphylococcal nuclease and tudor domain containing 1 [Source:MGI Symbol;Acc:MGI:1929266]	2.88014
Amph	amphiphysin [Source:MGI Symbol;Acc:MGI:103574]	2.87326
Ttc28	tetratricopeptide repeat domain 28 [Source:MGI Symbol;Acc:MGI:2140873]	2.87164
Mapt	microtubule-associated protein tau [Source:MGI Symbol;Acc:MGI:97180]	2.87116
Scai	suppressor of cancer cell invasion [Source:MGI Symbol;Acc:MGI:2443716]	2.86083
Tmem200b	transmembrane protein 200B [Source:MGI Symbol;Acc:MGI:3646343]	2.85673
Susd2	sushi domain containing 2 [Source:MGI Symbol;Acc:MGI:1918983]	2.84919
Kitl	kit ligand [Source:MGI Symbol;Acc:MGI:96974]	2.84517
Dcaf12l1	DDB1 and CUL4 associated factor 12-like 1 [Source:MGI Symbol;Acc:MGI:2444462]	2.81312
Rps6ka6	ribosomal protein S6 kinase polypeptide 6 [Source:MGI Symbol;Acc:MGI:1914321]	2.80193
Ssbp4	single stranded DNA binding protein 4 [Source:MGI Symbol;Acc:MGI:1924150]	2.80052
Fam115a	family with sequence similarity 115, member A [Source:MGI Symbol;Acc:MGI:1914665]	2.79835
Pfn2	profilin 2 [Source:MGI Symbol;Acc:MGI:97550]	2.79392
Zfp606	zinc finger protein 606 [Source:MGI Symbol;Acc:MGI:1914620]	2.78181
Gpx3	glutathione peroxidase 3 [Source:MGI Symbol;Acc:MGI:105102]	2.77931
Large	like-glycosyltransferase [Source:MGI Symbol;Acc:MGI:1342270]	2.77733
Neurl1a	neuralized homolog 1A (Drosophila) [Source:MGI Symbol;Acc:MGI:1334263]	2.7643
Ascl2	achaete-scute complex homolog 2 (Drosophila) [Source:MGI Symbol;Acc:MGI:96920]	2.75748
Dmd	dystrophin, muscular dystrophy [Source:MGI Symbol;Acc:MGI:94909]	2.7556
Igsf3	immunoglobulin superfamily, member 3 [Source:MGI Symbol;Acc:MGI:1926158]	2.75551
Cxadr	coxsackie virus and adenovirus receptor [Source:MGI Symbol;Acc:MGI:1201679]	2.75396
Plxna2	plexin A2 [Source:MGI Symbol;Acc:MGI:107684]	2.73747
Msi2	Musashi homolog 2 (Drosophila) [Source:MGI Symbol;Acc:MGI:1923876]	2.7283
Pkp4	plakophilin 4 [Source:MGI Symbol;Acc:MGI:109281]	2.72376
Ust	uronyl-2-sulfotransferase [Source:MGI Symbol;Acc:MGI:2442406]	2.69771
Fam53b	fibroblast growth factor receptor 2 [Source:MGI Symbol;Acc:MGI:95523]	2.69323
Id1	inhibitor of DNA binding 1 [Source:MGI Symbol;Acc:MGI:96396]	2.66784
Igfbp3	insulin-like growth factor binding protein 3 [Source:MGI Symbol;Acc:MGI:96438]	2.66399
Sbk1	SH3-binding kinase 1 [Source:MGI Symbol;Acc:MGI:2135937]	2.66144
Grlf1	glucocorticoid receptor DNA binding factor 1 [Source:MGI Symbol;Acc:MGI:1929494]	2.65625
Ncam1	neural cell adhesion molecule 1 [Source:MGI Symbol;Acc:MGI:97281]	2.64928
Syt11	synaptotagmin XI [Source:MGI Symbol;Acc:MGI:1859547]	2.64387
Lphn1	latrophilin 1 [Source:MGI Symbol;Acc:MGI:1929461]	2.64033
Cdc42ep2	CDC42 effector protein (Rho GTPase binding) 2 [Source:MGI Symbol;Acc:MGI:1929744]	2.63606
Pvrl3	poliovirus receptor-related 3 [Source:MGI Symbol;Acc:MGI:1930171]	2.63485
Itpka	inositol 1,4,5-trisphosphate 3-kinase A [Source:MGI Symbol;Acc:MGI:1333822]	2.63438
Zfp266	zinc finger protein 266 [Source:MGI Symbol;Acc:MGI:1924769]	2.63405
Stard8	START domain containing 8 [Source:MGI Symbol;Acc:MGI:2448556]	2.63133
Ski	ski sarcoma viral oncogene homolog (avian) [Source:MGI Symbol;Acc:MGI:98310]	2.6246
Fam171b	family with sequence similarity 171, member B [Source:MGI Symbol;Acc:MGI:2444579]	2.61668
Scube1	signal peptide, CUB domain, EGF-like 1 [Source:MGI Symbol;Acc:MGI:1890616]	2.61151
Ier2	immediate early response 2 [Source:MGI Symbol;Acc:MGI:104815]	2.61083
Vbp1	von Hippel-Lindau binding protein 1 [Source:MGI Symbol;Acc:MGI:1333804]	2.60843
Bhlhb9	basic helix-loop-helix domain containing, class B9 [Source:MGI Symbol;Acc:MGI:1917487]	2.60026
Rapgefl1	Rap guanine nucleotide exchange factor (GEF)-like 1 [Source:MGI Symbol;Acc:MGI:3611446]	2.59706
Bmp7	bone morphogenetic protein 7 [Source:MGI Symbol;Acc:MGI:103302]	2.59652
Lrrn4	leucine rich repeat neuronal 4 [Source:MGI Symbol;Acc:MGI:2445154]	2.58338
Mdfic	MyoD family inhibitor domain containing [Source:MGI Symbol;Acc:MGI:104611]	2.58083
Inpp5a	inositol polyphosphate-5-phosphatase A [Source:MGI Symbol;Acc:MGI:2686961]	2.57935
Wnk4	WNK lysine deficient protein kinase 4 [Source:MGI Symbol;Acc:MGI:1917097]	2.57087
Rhoq	ras homolog gene family, member Q [Source:MGI Symbol;Acc:MGI:1931553]	2.56628
Prkce	protein kinase C, epsilon [Source:MGI Symbol;Acc:MGI:97599]	2.54345
Nrarp	Notch-regulated ankyrin repeat protein [Source:MGI Symbol;Acc:MGI:1914372]	2.53879
Fam49a	family with sequence similarity 49, member A [Source:MGI Symbol;Acc:MGI:1261783]	2.53405
Slc40a1	solute carrier family 40 (iron-regulated transporter), member 1 [Source:MGI Symbol;Acc:MGI:1315204]	2.53357
Schip1	schwannomin interacting protein 1 [Source:MGI Symbol;Acc:MGI:1353557]	2.53325
Ier5l	immediate early response 5-like [Source:MGI Symbol;Acc:MGI:1919750]	2.52331
Lcorl	non-SMC condensin I complex, subunit G [Source:MGI Symbol;Acc:MGI:1930197]	2.50175
Ckb	creatine kinase, brain [Source:MGI Symbol;Acc:MGI:88407]	2.50075
2006-09-01	predicted gene 15008 [Source:MGI Symbol;Acc:MGI:3705107]	2.4969
Nab2	signal transducer and activator of transcription 6 [Source:MGI Symbol;Acc:MGI:103034]	2.49665
Limd2	LIM domain containing 2 [Source:MGI Symbol;Acc:MGI:1915053]	2.48082
1600021P15Rik	RIKEN cDNA 1600021P15 gene [Source:MGI Symbol;Acc:MGI:1917028]	2.47959
Cyba	predicted gene 20388 [Source:MGI Symbol;Acc:MGI:5141853]	2.4711
Tspan15	tetraspanin 15 [Source:MGI Symbol;Acc:MGI:1917673]	2.46297
Rap1gap	Rap1 GTPase-activating protein [Source:MGI Symbol;Acc:MGI:109338]	2.46027
Fam46a	family with sequence similarity 46, member A [Source:MGI Symbol;Acc:MGI:2670964]	2.44829
Faah	fatty acid amide hydrolase [Source:MGI Symbol;Acc:MGI:109609]	2.44397
Irx5	Iroquois related homeobox 5 (Drosophila) [Source:MGI Symbol;Acc:MGI:1859086]	2.44337
Ets1	E26 avian leukemia oncogene 1, 5' domain [Source:MGI Symbol;Acc:MGI:95455]	2.42549
Notch3	Notch gene homolog 3 (Drosophila) [Source:MGI Symbol;Acc:MGI:99460]	2.42422
Itgb5	integrin beta 5 [Source:MGI Symbol;Acc:MGI:96614]	2.41974
Rai1	retinoic acid induced 1 [Source:MGI Symbol;Acc:MGI:103291]	2.4171
Cpxm1	carboxypeptidase X 1 (M14 family) [Source:MGI Symbol;Acc:MGI:1934569]	2.41495
Zfp788	zinc finger protein 788 [Source:MGI Symbol;Acc:MGI:1914857]	2.41464
Aif1l	allograft inflammatory factor 1-like [Source:MGI Symbol;Acc:MGI:1919598]	2.40907
F3	coagulation factor III [Source:MGI Symbol;Acc:MGI:88381]	2.405
Hs6st1	heparan sulfate 6-O-sulfotransferase 1 [Source:MGI Symbol;Acc:MGI:1354958]	2.40478
Sulf2	nuclear receptor coactivator 3 [Source:MGI Symbol;Acc:MGI:1276535]	2.40361
Khdrbs3	KH domain containing, RNA binding, signal transduction associated 3 [Source:MGI Symbol;Acc:MGI:1313312]	2.4015
Grik5	glutamate receptor, ionotropic, kainate 5 (gamma 2) [Source:MGI Symbol;Acc:MGI:95818]	2.3879
Ppp3ca	protein phosphatase 3, catalytic subunit, alpha isoform [Source:MGI Symbol;Acc:MGI:107164]	2.38434
Cask	calcium/calmodulin-dependent serine protein kinase (MAGUK family) [Source:MGI Symbol;Acc:MGI:1309489]	2.38321
Adamtsl3	ADAMTS-like 3 [Source:MGI Symbol;Acc:MGI:3028499]	2.37672
Nck2	non-catalytic region of tyrosine kinase adaptor protein 2 [Source:MGI Symbol;Acc:MGI:1306821]	2.37657
App	amyloid beta (A4) precursor protein [Source:MGI Symbol;Acc:MGI:88059]	2.34736
Tcf19	transcription factor 19 [Source:MGI Symbol;Acc:MGI:103180]	2.34575
Idh1	isocitrate dehydrogenase 1 (NADP+), soluble [Source:MGI Symbol;Acc:MGI:96413]	2.3382
Eid1	SHC (Src homology 2 domain containing) family, member 4 [Source:MGI Symbol;Acc:MGI:2655364]	2.33694
Asap1	ArfGAP with SH3 domain, ankyrin repeat and PH domain1 [Source:MGI Symbol;Acc:MGI:1342335]	2.3299
Rab6b	RAB6B, member RAS oncogene family [Source:MGI Symbol;Acc:MGI:107283]	2.32976
Rbfox2	RNA binding protein, fox-1 homolog (C. elegans) 2 [Source:MGI Symbol;Acc:MGI:1933973]	2.32289
Smad3	MAD homolog 3 (Drosophila) [Source:MGI Symbol;Acc:MGI:1201674]	2.32282
Tmem55a	transmembrane protein 55A [Source:MGI Symbol;Acc:MGI:1919769]	2.32116
Efna2	ephrin A2 [Source:MGI Symbol;Acc:MGI:102707]	2.31444
Myo1b	myosin IB [Source:MGI Symbol;Acc:MGI:107752]	2.3129
Trim59	tripartite motif-containing 59 [Source:MGI Symbol;Acc:MGI:1914199]	2.30961
Marcks	myristoylated alanine rich protein kinase C substrate [Source:MGI Symbol;Acc:MGI:96907]	2.30465
Tpbg	RIKEN cDNA 9330154J02 gene [Source:MGI Symbol;Acc:MGI:3045244]	2.29951
Sgms1	sphingomyelin synthase 1 [Source:MGI Symbol;Acc:MGI:2444110]	2.28948
Trim36	tripartite motif-containing 36 [Source:MGI Symbol;Acc:MGI:106264]	2.28889
Mageb16	melanoma antigen family B, 16 [Source:MGI Symbol;Acc:MGI:1919217]	2.28155
Arhgap29	Rho GTPase activating protein 29 [Source:MGI Symbol;Acc:MGI:2443818]	2.2662
Synpo	synaptopodin [Source:MGI Symbol;Acc:MGI:1099446]	2.265
Fam33a	family with sequence similarity 33, member A [Source:MGI Symbol;Acc:MGI:1913390]	2.26227
Mastl	microtubule associated serine/threonine kinase-like [Source:MGI Symbol;Acc:MGI:1914371]	2.26179
Acsl4	acyl-CoA synthetase long-chain family member 4 [Source:MGI Symbol;Acc:MGI:1354713]	2.26002
Kank2	KN motif and ankyrin repeat domains 2 [Source:MGI Symbol;Acc:MGI:2384568]	2.24579
Pvrl1	poliovirus receptor-related 1 [Source:MGI Symbol;Acc:MGI:1926483]	2.2451
Sfxn3	sideroflexin 3 [Source:MGI Symbol;Acc:MGI:2137679]	2.2431
Adam8	predicted gene 16201 [Source:MGI Symbol;Acc:MGI:3802153]	2.24096
Gm20532	EGF-like domain 7 [Source:MGI Symbol;Acc:MGI:2449923]	2.24063
Pdia5	protein disulfide isomerase associated 5 [Source:MGI Symbol;Acc:MGI:1919849]	2.23078
Slc35e4	solute carrier family 35, member E4 [Source:MGI Symbol;Acc:MGI:2144150]	2.21841
Tmed1	dynamin 2 [Source:MGI Symbol;Acc:MGI:109547]	2.21788
Slc45a3	solute carrier family 45, member 3 [Source:MGI Symbol;Acc:MGI:1922082]	2.21504
Car2	carbonic anhydrase 2 [Source:MGI Symbol;Acc:MGI:88269]	2.21097
Usp54	RIKEN cDNA 1810062O18 gene [Source:MGI Symbol;Acc:MGI:1922852]	2.20816
Fam171a1	family with sequence similarity 171, member A1 [Source:MGI Symbol;Acc:MGI:2442917]	2.20603
Syt13	synaptotagmin XIII [Source:MGI Symbol;Acc:MGI:1933945]	2.19931
Plod2	procollagen lysine, 2-oxoglutarate 5-dioxygenase 2 [Source:MGI Symbol;Acc:MGI:1347007]	2.1884
2610008E11Rik	RIKEN cDNA 2610008E11 gene [Source:MGI Symbol;Acc:MGI:1919378]	2.18416
Celf2	CUGBP, Elav-like family member 2 [Source:MGI Symbol;Acc:MGI:1338822]	2.1835
Zfp229	zinc finger protein 229 [Source:MGI Symbol;Acc:MGI:2679295]	2.17784
Ttc3	phosphatidylinositol glycan anchor biosynthesis, class P [Source:MGI Symbol;Acc:MGI:1860433]	2.17572
Atf7ip	activating transcription factor 7 interacting protein [Source:MGI Symbol;Acc:MGI:1858965]	2.15427
Fosl2	fos-like antigen 2 [Source:MGI Symbol;Acc:MGI:102858]	2.15096
Cdk5r1	cyclin-dependent kinase 5, regulatory subunit 1 (p35) [Source:MGI Symbol;Acc:MGI:101764]	2.14945
Calm3	calmodulin 3 [Source:MGI Symbol;Acc:MGI:103249]	2.14938
Sepw1	selenoprotein W, muscle 1 [Source:MGI Symbol;Acc:MGI:1100878]	2.14925
Prkag2	protein kinase, AMP-activated, gamma 2 non-catalytic subunit [Source:MGI Symbol;Acc:MGI:1336153]	2.13313
Clasp1	CLIP associating protein 1 [Source:MGI Symbol;Acc:MGI:1923957]	2.13189
Acot1	acyl-CoA thioesterase 1 [Source:MGI Symbol;Acc:MGI:1349396]	2.13071
A530017D24Rik	RIKEN cDNA A530017D24 gene [Source:MGI Symbol;Acc:MGI:2144320]	2.12609
Pcmtd1	protein-L-isoaspartate (D-aspartate) O-methyltransferase domain containing 1 [Source:MGI Symbol;Acc:MGI:2441773]	2.12522
Vwa5a	von Willebrand factor A domain containing 5A [Source:MGI Symbol;Acc:MGI:1915026]	2.12014
Tuba1a	tubulin, alpha 1A [Source:MGI Symbol;Acc:MGI:98869]	2.11898
Adamts10	a disintegrin-like and metallopeptidase (reprolysin type) with thrombospondin type 1 motif, 10 [Source:MGI Symbol;Acc:MGI:2449112]	2.11768
Pdcd4	programmed cell death 4 [Source:MGI Symbol;Acc:MGI:107490]	2.11325
Nck1	non-catalytic region of tyrosine kinase adaptor protein 1 [Source:MGI Symbol;Acc:MGI:109601]	2.1092
Ube2v2	ubiquitin-conjugating enzyme E2 variant 2 [Source:MGI Symbol;Acc:MGI:1917870]	2.1082
Laptm4b	lysosomal-associated protein transmembrane 4B [Source:MGI Symbol;Acc:MGI:1890494]	2.10375
Ctbp2	fibroblast growth factor receptor 2 [Source:MGI Symbol;Acc:MGI:95523]	2.09758
Rac3	RAS-related C3 botulinum substrate 3 [Source:MGI Symbol;Acc:MGI:2180784]	2.09546
Magi1	membrane associated guanylate kinase, WW and PDZ domain containing 1 [Source:MGI Symbol;Acc:MGI:1203522]	2.08975
BC032203	cDNA sequence BC032203 [Source:MGI Symbol;Acc:MGI:2673855]	2.08833
Fam108c	family with sequence similarity 108, member C [Source:MGI Symbol;Acc:MGI:1917428]	2.08631
Rhof	transmembrane protein 120B [Source:MGI Symbol;Acc:MGI:3603158]	2.08401
Sema6d	sema domain, transmembrane domain (TM), and cytoplasmic domain, (semaphorin) 6D [Source:MGI Symbol;Acc:MGI:2387661]	2.07484
Srpk2	myeloid/lymphoid or mixed-lineage leukemia 5 [Source:MGI Symbol;Acc:MGI:1924825]	2.07213
Pnrc2	proline-rich nuclear receptor coactivator 2 [Source:MGI Symbol;Acc:MGI:106512]	2.06861
Unc5b	unc-5 homolog B (C. elegans) [Source:MGI Symbol;Acc:MGI:894703]	2.05828
Ptpn14	protein tyrosine phosphatase, non-receptor type 14 [Source:MGI Symbol;Acc:MGI:102467]	2.05669
Cnp	2',3'-cyclic nucleotide 3' phosphodiesterase [Source:MGI Symbol;Acc:MGI:88437]	2.05092
Zfand6	zinc finger, AN1-type domain 6 [Source:MGI Symbol;Acc:MGI:1929510]	2.05027
Hmgxb4	HMG box domain containing 4 [Source:MGI Symbol;Acc:MGI:1918073]	2.04409
Frmpd1	FERM and PDZ domain containing 1 [Source:MGI Symbol;Acc:MGI:2446274]	2.04058
Flna	filamin, alpha [Source:MGI Symbol;Acc:MGI:95556]	2.04056
Chm	choroidermia [Source:MGI Symbol;Acc:MGI:892979]	2.03518
Memo1	mediator of cell motility 1 [Source:MGI Symbol;Acc:MGI:1924140]	2.0298
Klf4	Kruppel-like factor 4 (gut) [Source:MGI Symbol;Acc:MGI:1342287]	2.02259
Nusap1	Opa interacting protein 5 [Source:MGI Symbol;Acc:MGI:1917895]	2.02214
Bag2	BCL2-associated athanogene 2 [Source:MGI Symbol;Acc:MGI:1891254]	2.01582
Atp1b1	ATPase, Na+/K+ transporting, beta 1 polypeptide [Source:MGI Symbol;Acc:MGI:88108]	2.01194
Tusc3	tumor suppressor candidate 3 [Source:MGI Symbol;Acc:MGI:1933134]	2.0118
Zkscan5	zinc finger with KRAB and SCAN domains 5 [Source:MGI Symbol;Acc:MGI:107533]	0.509192
Aqp3	aquaporin 3 [Source:MGI Symbol;Acc:MGI:1333777]	0.508479
Alas1	aminolevulinic acid synthase 1 [Source:MGI Symbol;Acc:MGI:87989]	0.507831
Rpp40	ribonuclease P 40 subunit (human) [Source:MGI Symbol;Acc:MGI:1346084]	0.507199
St14	suppression of tumorigenicity 14 (colon carcinoma) [Source:MGI Symbol;Acc:MGI:1338881]	0.507133
Mpv17l2	RAB3A, member RAS oncogene family [Source:MGI Symbol;Acc:MGI:97843]	0.506212
Clip2	CAP-GLY domain containing linker protein 2 [Source:MGI Symbol;Acc:MGI:1313136]	0.505781
Fam82a2	RAD51 homolog (S. cerevisiae) [Source:MGI Symbol;Acc:MGI:97890]	0.50541
Sema7a	sema domain, immunoglobulin domain (Ig), and GPI membrane anchor, (semaphorin) 7A [Source:MGI Symbol;Acc:MGI:1306826]	0.504449
Slc43a2	solute carrier family 43, member 2 [Source:MGI Symbol;Acc:MGI:2442746]	0.503819
Rpusd2	RNA pseudouridylate synthase domain containing 2 [Source:MGI Symbol;Acc:MGI:1918066]	0.503484
Slc17a5	solute carrier family 17 (anion/sugar transporter), member 5 [Source:MGI Symbol;Acc:MGI:1924105]	0.501966
Tctn1	hydrogen voltage-gated channel 1 [Source:MGI Symbol;Acc:MGI:1921346]	0.501259
Lrp10	low-density lipoprotein receptor-related protein 10 [Source:MGI Symbol;Acc:MGI:1929480]	0.4999
Acox3	RIKEN cDNA 4931431C16 gene [Source:MGI Symbol;Acc:MGI:1921614]	0.499597
Atg2b	ATG2 autophagy related 2 homolog B (S. cerevisiae) [Source:MGI Symbol;Acc:MGI:1923809]	0.499045
Arrdc1	arrestin domain containing 1 [Source:MGI Symbol;Acc:MGI:2446136]	0.499029
Mccc1	methylcrotonoyl-Coenzyme A carboxylase 1 (alpha) [Source:MGI Symbol;Acc:MGI:1919289]	0.498532
Cish	cytokine inducible SH2-containing protein [Source:MGI Symbol;Acc:MGI:103159]	0.49844
Csf2ra	colony stimulating factor 2 receptor, alpha, low-affinity (granulocyte-macrophage) [Source:MGI Symbol;Acc:MGI:1339754]	0.497082
Ulk1	Unc-51 like kinase 1 (C. elegans) [Source:MGI Symbol;Acc:MGI:1270126]	0.496515
Pim1	proviral integration site 1 [Source:MGI Symbol;Acc:MGI:97584]	0.496318
Agtpbp1	ATP/GTP binding protein 1 [Source:MGI Symbol;Acc:MGI:2159437]	0.495457
Nudt19	nudix (nucleoside diphosphate linked moiety X)-type motif 19 [Source:MGI Symbol;Acc:MGI:94203]	0.495095
Slc5a6	solute carrier family 5 (sodium-dependent vitamin transporter), member 6 [Source:MGI Symbol;Acc:MGI:2660847]	0.49402
Vegfb	vascular endothelial growth factor B [Source:MGI Symbol;Acc:MGI:106199]	0.493247
Arhgef5	Rho guanine nucleotide exchange factor (GEF) 5 [Source:MGI Symbol;Acc:MGI:1858952]	0.493078
Zfp28	zinc finger protein 28 [Source:MGI Symbol;Acc:MGI:99175]	0.492645
Spint1	serine protease inhibitor, Kunitz type 1 [Source:MGI Symbol;Acc:MGI:1338033]	0.491883
Hook2	hook homolog 2 (Drosophila) [Source:MGI Symbol;Acc:MGI:2181664]	0.491669
Cdyl2	chromodomain protein, Y chromosome-like 2 [Source:MGI Symbol;Acc:MGI:1923046]	0.491004
Siae	sialic acid acetylesterase [Source:MGI Symbol;Acc:MGI:104803]	0.490844
Cd82	CD82 antigen [Source:MGI Symbol;Acc:MGI:104651]	0.490554
4930455F23Rik	RIKEN cDNA 4930455F23 gene [Source:MGI Symbol;Acc:MGI:1922145]	0.490532
Tom1l2	target of myb1-like 2 (chicken) [Source:MGI Symbol;Acc:MGI:2443306]	0.490009
Arhgef37	Rho guanine nucleotide exchange factor (GEF) 37 [Source:MGI Symbol;Acc:MGI:3045339]	0.489003
Ampd2	adenosine monophosphate deaminase 2 [Source:MGI Symbol;Acc:MGI:88016]	0.488793
Fbxl6	F-box and leucine-rich repeat protein 6 [Source:MGI Symbol;Acc:MGI:1354705]	0.487556
Ints6	serpin peptidase inhibitor, clade E (nexin, plasminogen activator inhibitor type 1), member 3 [Source:MGI Symbol;Acc:MGI:2442020]	0.487361
Pygl	liver glycogen phosphorylase [Source:MGI Symbol;Acc:MGI:97829]	0.486705
5430411K18Rik	RIKEN cDNA 5430411K18 gene [Source:MGI Symbol;Acc:MGI:1918673]	0.484005
Vps8	vacuolar protein sorting 8 homolog (S. cerevisiae) [Source:MGI Symbol;Acc:MGI:2146407]	0.483958
Btg2	B cell translocation gene 2, anti-proliferative [Source:MGI Symbol;Acc:MGI:108384]	0.483634
Plk1s1	polo-like kinase 1 substrate 1 [Source:MGI Symbol;Acc:MGI:2684960]	0.482583
Smpd1	sphingomyelin phosphodiesterase 1, acid lysosomal [Source:MGI Symbol;Acc:MGI:98325]	0.481488
Plekhm3	pleckstrin homology domain containing, family M, member 3 [Source:MGI Symbol;Acc:MGI:2443627]	0.480592
Gramd3	GRAM domain containing 3 [Source:MGI Symbol;Acc:MGI:1914815]	0.480267
Fchsd1	RELT-like 2 [Source:MGI Symbol;Acc:MGI:1918044]	0.479795
Gpr56	G protein-coupled receptor 56 [Source:MGI Symbol;Acc:MGI:1340051]	0.479305
Gstm4	glutathione S-transferase, mu 4 [Source:MGI Symbol;Acc:MGI:95862]	0.47829
Dsp	desmoplakin [Source:MGI Symbol;Acc:MGI:109611]	0.474548
Slc25a33	solute carrier family 25, member 33 [Source:MGI Symbol;Acc:MGI:1917806]	0.473442
Lipe	lipase, hormone sensitive [Source:MGI Symbol;Acc:MGI:96790]	0.473236
Echdc2	enoyl Coenzyme A hydratase domain containing 2 [Source:MGI Symbol;Acc:MGI:1289238]	0.47279
Uaca	uveal autoantigen with coiled-coil domains and ankyrin repeats [Source:MGI Symbol;Acc:MGI:1919815]	0.470071
Hagh	hydroxyacyl glutathione hydrolase [Source:MGI Symbol;Acc:MGI:95745]	0.46976
Ift88	intraflagellar transport 88 homolog (Chlamydomonas) [Source:MGI Symbol;Acc:MGI:98715]	0.469192
Atf6	activating transcription factor 6 [Source:MGI Symbol;Acc:MGI:1926157]	0.468558
Gpr50	G-protein-coupled receptor 50 [Source:MGI Symbol;Acc:MGI:1333877]	0.46654
Igsf8	immunoglobulin superfamily, member 8 [Source:MGI Symbol;Acc:MGI:2154090]	0.466166
Pigb	predicted gene 20510 [Source:MGI Symbol;Acc:MGI:5141975]	0.465512
Ankrd24	ankyrin repeat domain 24 [Source:MGI Symbol;Acc:MGI:1890394]	0.464768
Glis1	No description	0.464055
Kdm2b	lysine (K)-specific demethylase 2B [Source:MGI Symbol;Acc:MGI:1354737]	0.46372
Wdr35	WD repeat domain 35 [Source:MGI Symbol;Acc:MGI:1921932]	0.463044
Rhox6	reproductive homeobox 6 [Source:MGI Symbol;Acc:MGI:1202888]	0.462041
Plekhh1	pleckstrin homology domain containing, family H (with MyTH4 domain) member 1 [Source:MGI Symbol;Acc:MGI:2144989]	0.461517
Arsa	arylsulfatase A [Source:MGI Symbol;Acc:MGI:88077]	0.461487
Pcbp3	poly(rC) binding protein 3 [Source:MGI Symbol;Acc:MGI:1890470]	0.461087
Wdfy2	WD repeat and FYVE domain containing 2 [Source:MGI Symbol;Acc:MGI:2442811]	0.46097
Arrdc2	arrestin domain containing 2 [Source:MGI Symbol;Acc:MGI:1918057]	0.459896
Tmed8	transmembrane emp24 domain containing 8 [Source:MGI Symbol;Acc:MGI:1923480]	0.459272
Cd3eap	CD3E antigen, epsilon polypeptide associated protein [Source:MGI Symbol;Acc:MGI:1917583]	0.459243
Slc41a2	solute carrier family 41, member 2 [Source:MGI Symbol;Acc:MGI:2442940]	0.459195
Cldn4	claudin 4 [Source:MGI Symbol;Acc:MGI:1313314]	0.458503
C2cd2l	C2 calcium-dependent domain containing 2-like [Source:MGI Symbol;Acc:MGI:1919014]	0.458421
Plekha6	pleckstrin homology domain containing, family A member 6 [Source:MGI Symbol;Acc:MGI:2388662]	0.458273
Qdpr	quinoid dihydropteridine reductase [Source:MGI Symbol;Acc:MGI:97836]	0.458163
Tcf4	transcription factor 4 [Source:MGI Symbol;Acc:MGI:98506]	0.456934
RP24-170A20.3	No description	0.455894
Por	P450 (cytochrome) oxidoreductase [Source:MGI Symbol;Acc:MGI:97744]	0.454973
Morn4	MORN repeat containing 4 [Source:MGI Symbol;Acc:MGI:2449568]	0.454717
Tfeb	transcription factor EB [Source:MGI Symbol;Acc:MGI:103270]	0.454626
Ppargc1b	peroxisome proliferative activated receptor, gamma, coactivator 1 beta [Source:MGI Symbol;Acc:MGI:2444934]	0.453285
Rassf2	Ras association (RalGDS/AF-6) domain family member 2 [Source:MGI Symbol;Acc:MGI:2442060]	0.451257
Gatsl3	GATS protein-like 3 [Source:MGI Symbol;Acc:MGI:1919212]	0.450761
Klf9	Kruppel-like factor 9 [Source:MGI Symbol;Acc:MGI:1333856]	0.447553
2310047M10Rik	RIKEN cDNA 9330160F10 gene [Source:MGI Symbol;Acc:MGI:3693095]	0.447062
Btbd11	BTB (POZ) domain containing 11 [Source:MGI Symbol;Acc:MGI:1921257]	0.446939
Ada	adenosine deaminase [Source:MGI Symbol;Acc:MGI:87916]	0.44693
Tgm2	regulation of nuclear pre-mRNA domain containing 1B [Source:MGI Symbol;Acc:MGI:1917720]	0.446609
4932442L08Rik	RIKEN cDNA 4932442L08 gene [Source:MGI Symbol;Acc:MGI:1921682]	0.446541
2310030G06Rik	RIKEN cDNA 2310030G06 gene [Source:MGI Symbol;Acc:MGI:1914202]	0.446517
Apba3	amyloid beta (A4) precursor protein-binding, family A, member 3 [Source:MGI Symbol;Acc:MGI:1888527]	0.446314
Hivep2	human immunodeficiency virus type I enhancer binding protein 2 [Source:MGI Symbol;Acc:MGI:1338076]	0.446042
Arhgef6	Rac/Cdc42 guanine nucleotide exchange factor (GEF) 6 [Source:MGI Symbol;Acc:MGI:1920591]	0.443057
Tmem120a	transmembrane protein 120A [Source:MGI Symbol;Acc:MGI:2686991]	0.442282
Abcd1	ATP-binding cassette, sub-family D (ALD), member 1 [Source:MGI Symbol;Acc:MGI:1349215]	0.442022
Prkra	protein kinase, interferon inducible double stranded RNA dependent activator [Source:MGI Symbol;Acc:MGI:1344375]	0.441902
C330006K01Rik	RIKEN cDNA C330006K01 gene [Source:MGI Symbol;Acc:MGI:1924908]	0.440037
4930572J05Rik	RIKEN cDNA 4930572J05 gene [Source:MGI Symbol;Acc:MGI:1925301]	0.438805
Tbc1d7	TBC1 domain family, member 7 [Source:MGI Symbol;Acc:MGI:1914296]	0.438491
Irf2	interferon regulatory factor 2 [Source:MGI Symbol;Acc:MGI:96591]	0.43786
Ttc38	tetratricopeptide repeat domain 38 [Source:MGI Symbol;Acc:MGI:2146198]	0.436623
Mib2	mindbomb homolog 2 (Drosophila) [Source:MGI Symbol;Acc:MGI:2679684]	0.436513
Ly6e	lymphocyte antigen 6 complex, locus E [Source:MGI Symbol;Acc:MGI:106651]	0.435302
1200009I06Rik	RIKEN cDNA 1200009I06 gene [Source:MGI Symbol;Acc:MGI:1921363]	0.432457
Lims2	LIM and senescent cell antigen like domains 2 [Source:MGI Symbol;Acc:MGI:2385067]	0.431716
Katnb1	katanin p80 (WD40-containing) subunit B 1 [Source:MGI Symbol;Acc:MGI:1921437]	0.430427
1600029D21Rik	RIKEN cDNA 1600029D21 gene [Source:MGI Symbol;Acc:MGI:1923759]	0.430421
Pxk	PX domain containing serine/threonine kinase [Source:MGI Symbol;Acc:MGI:1289230]	0.429465
Prss16	protease, serine, 16 (thymus) [Source:MGI Symbol;Acc:MGI:1859181]	0.429142
Zfp217	zinc finger protein 217 [Source:MGI Symbol;Acc:MGI:2685408]	0.42868
Pstpip1	proline-serine-threonine phosphatase-interacting protein 1 [Source:MGI Symbol;Acc:MGI:1321396]	0.428278
Tdrd7	tudor domain containing 7 [Source:MGI Symbol;Acc:MGI:2140279]	0.427489
Dkkl1	dickkopf-like 1 [Source:MGI Symbol;Acc:MGI:1354963]	0.427036
Abhd11	abhydrolase domain containing 11 [Source:MGI Symbol;Acc:MGI:1916008]	0.42661
Ccdc28a	coiled-coil domain containing 28A [Source:MGI Symbol;Acc:MGI:2443508]	0.425517
Gch1	GTP cyclohydrolase 1 [Source:MGI Symbol;Acc:MGI:95675]	0.424705
Rassf4	Ras association (RalGDS/AF-6) domain family member 4 [Source:MGI Symbol;Acc:MGI:2386853]	0.423722
Rab11fip4	RAB11 family interacting protein 4 (class II) [Source:MGI Symbol;Acc:MGI:2442920]	0.42372
Homez	homeodomain leucine zipper-encoding gene [Source:MGI Symbol;Acc:MGI:2678023]	0.422157
Tmco4	transmembrane and coiled-coil domains 4 [Source:MGI Symbol;Acc:MGI:1924306]	0.422082
Tpra1	transmembrane protein, adipocyte asscociated 1 [Source:MGI Symbol;Acc:MGI:1345190]	0.420592
Map3k6	mitogen-activated protein kinase kinase kinase 6 [Source:MGI Symbol;Acc:MGI:1855691]	0.420357
Coasy	Coenzyme A synthase [Source:MGI Symbol;Acc:MGI:1918993]	0.420317
Ctsl	cathepsin L [Source:MGI Symbol;Acc:MGI:88564]	0.420305
Bbs9	Bardet-Biedl syndrome 9 (human) [Source:MGI Symbol;Acc:MGI:2442833]	0.418975
C2cd2	C2 calcium-dependent domain containing 2 [Source:MGI Symbol;Acc:MGI:1891883]	0.418421
Gadd45b	growth arrest and DNA-damage-inducible 45 beta [Source:MGI Symbol;Acc:MGI:107776]	0.418344
Mob3c	MOB kinase activator 3C [Source:MGI Symbol;Acc:MGI:2140623]	0.418267
Acp6	acid phosphatase 6, lysophosphatidic [Source:MGI Symbol;Acc:MGI:1931010]	0.418238
Scfd2	Sec1 family domain containing 2 [Source:MGI Symbol;Acc:MGI:2443446]	0.417517
Jazf1	JAZF zinc finger 1 [Source:MGI Symbol;Acc:MGI:2141450]	0.416655
Dnase2a	deoxyribonuclease II alpha [Source:MGI Symbol;Acc:MGI:1329019]	0.416544
Ano10	anoctamin 10 [Source:MGI Symbol;Acc:MGI:2143103]	0.416001
Pnpla7	patatin-like phospholipase domain containing 7 [Source:MGI Symbol;Acc:MGI:2385325]	0.415288
Tuba4a	serine/threonine kinase 16 [Source:MGI Symbol;Acc:MGI:1313271]	0.415042
Gstm5	RIKEN cDNA 4933431E20 gene [Source:MGI Symbol;Acc:MGI:3584041]	0.413928
Stat2	signal transducer and activator of transcription 2 [Source:MGI Symbol;Acc:MGI:103039]	0.412677
Vsig10	V-set and immunoglobulin domain containing 10 [Source:MGI Symbol;Acc:MGI:2448533]	0.412633
Slc22a3	solute carrier family 22 (organic cation transporter), member 3 [Source:MGI Symbol;Acc:MGI:1333817]	0.411837
Dgat2	diacylglycerol O-acyltransferase 2 [Source:MGI Symbol;Acc:MGI:1915050]	0.410856
Tmem170b	transmembrane protein 170B [Source:MGI Symbol;Acc:MGI:3647046]	0.408213
Pak6	p21 protein (Cdc42/Rac)-activated kinase 6 [Source:MGI Symbol;Acc:MGI:2679420]	0.407288
Slc27a1	solute carrier family 27 (fatty acid transporter), member 1 [Source:MGI Symbol;Acc:MGI:1347098]	0.406951
Thnsl2	threonine synthase-like 2 (bacterial) [Source:MGI Symbol;Acc:MGI:3041254]	0.406101
Rab15	farnesyltransferase, CAAX box, beta [Source:MGI Symbol;Acc:MGI:1861305]	0.40434
Mpzl2	myelin protein zero-like 2 [Source:MGI Symbol;Acc:MGI:1289160]	0.40403
Pxmp4	peroxisomal membrane protein 4 [Source:MGI Symbol;Acc:MGI:1891701]	0.402057
Ltbp3	latent transforming growth factor beta binding protein 3 [Source:MGI Symbol;Acc:MGI:1101355]	0.401881
2310067B10Rik	RIKEN cDNA 2310067B10 gene [Source:MGI Symbol;Acc:MGI:1919197]	0.400851
Tmem150a	transmembrane protein 150A [Source:MGI Symbol;Acc:MGI:2385244]	0.399206
Ica1	islet cell autoantigen 1 [Source:MGI Symbol;Acc:MGI:96391]	0.399006
Myo6	myosin VI [Source:MGI Symbol;Acc:MGI:104785]	0.398429
Rora	RAR-related orphan receptor alpha [Source:MGI Symbol;Acc:MGI:104661]	0.398215
Ano8	DET1 and DDB1 associated 1 [Source:MGI Symbol;Acc:MGI:1913748]	0.397232
Ltbp4	latent transforming growth factor beta binding protein 4 [Source:MGI Symbol;Acc:MGI:1321395]	0.396692
Galt	interleukin 11 receptor, alpha chain 1 [Source:MGI Symbol;Acc:MGI:107426]	0.396333
Cblc	Casitas B-lineage lymphoma c [Source:MGI Symbol;Acc:MGI:1931457]	0.396204
Tmem180	transmembrane protein 180 [Source:MGI Symbol;Acc:MGI:1922396]	0.393974
Tnfaip2	tumor necrosis factor, alpha-induced protein 2 [Source:MGI Symbol;Acc:MGI:104960]	0.392913
Gcnt2	glucosaminyl (N-acetyl) transferase 2, I-branching enzyme [Source:MGI Symbol;Acc:MGI:1100870]	0.392882
Atg4c	autophagy-related 4C (yeast) [Source:MGI Symbol;Acc:MGI:2651854]	0.392072
Mmp28	RIKEN cDNA 1700020L24 gene [Source:MGI Symbol;Acc:MGI:1913580]	0.391866
Wdr60	WD repeat domain 60 [Source:MGI Symbol;Acc:MGI:2445085]	0.390997
Ctsf	cathepsin F [Source:MGI Symbol;Acc:MGI:1861434]	0.390842
Pparg	peroxisome proliferator activated receptor gamma [Source:MGI Symbol;Acc:MGI:97747]	0.38667
Syngr1	synaptogyrin 1 [Source:MGI Symbol;Acc:MGI:1328323]	0.384972
Rapgef3	Rap guanine nucleotide exchange factor (GEF) 3 [Source:MGI Symbol;Acc:MGI:2441741]	0.384371
Fzd5	frizzled homolog 5 (Drosophila) [Source:MGI Symbol;Acc:MGI:108571]	0.383606
Ehhadh	enoyl-Coenzyme A, hydratase/3-hydroxyacyl Coenzyme A dehydrogenase [Source:MGI Symbol;Acc:MGI:1277964]	0.38287
Evi5l	RIKEN cDNA 4932443L11 gene [Source:MGI Symbol;Acc:MGI:1926149]	0.380517
Metrnl	meteorin, glial cell differentiation regulator-like [Source:MGI Symbol;Acc:MGI:2384806]	0.379425
Tmem8b	RIKEN cDNA 4930412F15 gene [Source:MGI Symbol;Acc:MGI:2441678]	0.379316
Slc38a9	solute carrier family 38, member 9 [Source:MGI Symbol;Acc:MGI:1918839]	0.378709
5730559C18Rik	RIKEN cDNA 5730559C18 gene [Source:MGI Symbol;Acc:MGI:1921579]	0.377047
Aim1	absent in melanoma 1 [Source:MGI Symbol;Acc:MGI:109544]	0.37502
Gpr126	G protein-coupled receptor 126 [Source:MGI Symbol;Acc:MGI:1916151]	0.375015
5430407P10Rik	RIKEN cDNA 5430407P10 gene [Source:MGI Symbol;Acc:MGI:2442238]	0.374685
Cpeb3	cytoplasmic polyadenylation element binding protein 3 [Source:MGI Symbol;Acc:MGI:2443075]	0.373794
Xlr5a	X-linked lymphocyte-regulated 5A [Source:MGI Symbol;Acc:MGI:3574108]	0.373596
Sowahb	sosondowah ankyrin repeat domain family member B [Source:MGI Symbol;Acc:MGI:1925338]	0.373031
Alpl	alkaline phosphatase, liver/bone/kidney [Source:MGI Symbol;Acc:MGI:87983]	0.372628
Slc37a1	solute carrier family 37 (glycerol-3-phosphate transporter), member 1 [Source:MGI Symbol;Acc:MGI:2446181]	0.372239
Zfp334	zinc finger protein 334 [Source:MGI Symbol;Acc:MGI:2388656]	0.371717
Jak3	predicted gene 9933 [Source:MGI Symbol;Acc:MGI:3641937]	0.371679
Sigirr	single immunoglobulin and toll-interleukin 1 receptor (TIR) domain [Source:MGI Symbol;Acc:MGI:1344402]	0.368734
Kif13b	kinesin family member 13B [Source:MGI Symbol;Acc:MGI:1098265]	0.366965
C130071C03Rik	RIKEN cDNA C130071C03 gene [Source:MGI Symbol;Acc:MGI:2443574]	0.366875
Slc44a3	solute carrier family 44, member 3 [Source:MGI Symbol;Acc:MGI:2384860]	0.366388
Parp10	plectin [Source:MGI Symbol;Acc:MGI:1277961]	0.36567
Bsn	bassoon [Source:MGI Symbol;Acc:MGI:1277955]	0.36439
Serpinb9b	serine (or cysteine) peptidase inhibitor, clade B, member 9b [Source:MGI Symbol;Acc:MGI:894668]	0.359346
Tle6	transducin-like enhancer of split 6, homolog of Drosophila E(spl) [Source:MGI Symbol;Acc:MGI:2149593]	0.359092
D330028D13Rik	RIKEN cDNA D330028D13 gene [Source:MGI Symbol;Acc:MGI:2442161]	0.358471
Pnpla3	patatin-like phospholipase domain containing 3 [Source:MGI Symbol;Acc:MGI:2151796]	0.358155
Cryab	crystallin, alpha B [Source:MGI Symbol;Acc:MGI:88516]	0.35813
Slc46a1	solute carrier family 46, member 1 [Source:MGI Symbol;Acc:MGI:1098733]	0.357831
Fam167a	family with sequence similarity 167, member A [Source:MGI Symbol;Acc:MGI:3606565]	0.357439
2010011I20Rik	RIKEN cDNA 2010011I20 gene [Source:MGI Symbol;Acc:MGI:1914267]	0.351175
Mavs	mitochondrial antiviral signaling protein [Source:MGI Symbol;Acc:MGI:2444773]	0.349906
Tmem40	transmembrane protein 40 [Source:MGI Symbol;Acc:MGI:2137870]	0.347796
Mertk	c-mer proto-oncogene tyrosine kinase [Source:MGI Symbol;Acc:MGI:96965]	0.347394
Crebl2	cAMP responsive element binding protein-like 2 [Source:MGI Symbol;Acc:MGI:1889385]	0.3432
Arhgap9	Rho GTPase activating protein 9 [Source:MGI Symbol;Acc:MGI:2143764]	0.342189
Serinc5	serine incorporator 5 [Source:MGI Symbol;Acc:MGI:2444223]	0.341495
Tmem54	transmembrane protein 54 [Source:MGI Symbol;Acc:MGI:1913510]	0.337018
Dync2li1	dynein cytoplasmic 2 light intermediate chain 1 [Source:MGI Symbol;Acc:MGI:1913996]	0.335999
Eif2c4	eukaryotic translation initiation factor 2C, 4 [Source:MGI Symbol;Acc:MGI:1924100]	0.33224
Pex11a	peroxisomal biogenesis factor 11 alpha [Source:MGI Symbol;Acc:MGI:1338788]	0.331037
Psd4	pleckstrin and Sec7 domain containing 4 [Source:MGI Symbol;Acc:MGI:2674093]	0.328018
Tmem229b	transmembrane protein 229B [Source:MGI Symbol;Acc:MGI:2444389]	0.327627
Serpinb9d	serine (or cysteine) peptidase inhibitor, clade B, member 9d [Source:MGI Symbol;Acc:MGI:894667]	0.326796
Aldh3b2	aldehyde dehydrogenase 3 family, member B2 [Source:MGI Symbol;Acc:MGI:2147613]	0.326287
Hcn2	hyperpolarization-activated, cyclic nucleotide-gated K+ 2 [Source:MGI Symbol;Acc:MGI:1298210]	0.326187
Tgm1	transglutaminase 1, K polypeptide [Source:MGI Symbol;Acc:MGI:98730]	0.325743
Sat2	spermidine/spermine N1-acetyl transferase 2 [Source:MGI Symbol;Acc:MGI:1916465]	0.325573
Phka1	phosphorylase kinase alpha 1 [Source:MGI Symbol;Acc:MGI:97576]	0.325373
Epb4.1l4b	erythrocyte protein band 4.1-like 4b [Source:MGI Symbol;Acc:MGI:1859149]	0.3252
Slc7a7	oxidase assembly 1-like [Source:MGI Symbol;Acc:MGI:1916339]	0.325097
Cldn3	claudin 3 [Source:MGI Symbol;Acc:MGI:1329044]	0.323101
Ovol2	ovo-like 2 (Drosophila) [Source:MGI Symbol;Acc:MGI:1338039]	0.321871
Nagpa	N-acetylglucosamine-1-phosphodiester alpha-N-acetylglucosaminidase [Source:MGI Symbol;Acc:MGI:1351598]	0.320506
Ankrd42	coiled-coil domain containing 90B [Source:MGI Symbol;Acc:MGI:1913615]	0.320212
Aldh6a1	RIKEN cDNA 2900006K08 gene [Source:MGI Symbol;Acc:MGI:1920123]	0.319945
Mgat4a	mannoside acetylglucosaminyltransferase 4, isoenzyme A [Source:MGI Symbol;Acc:MGI:2662992]	0.319544
Sgk2	serum/glucocorticoid regulated kinase 2 [Source:MGI Symbol;Acc:MGI:1351318]	0.318425
Loh12cr1	loss of heterozygosity, 12, chromosomal region 1 homolog (human) [Source:MGI Symbol;Acc:MGI:1915024]	0.317925
2610318N02Rik	RIKEN cDNA 2610318N02 gene [Source:MGI Symbol;Acc:MGI:1917708]	0.316492
Tulp1	tubby like protein 1 [Source:MGI Symbol;Acc:MGI:109571]	0.314925
Rasd1	RAS, dexamethasone-induced 1 [Source:MGI Symbol;Acc:MGI:1270848]	0.314584
Slc22a5	solute carrier family 22 (organic cation transporter), member 5 [Source:MGI Symbol;Acc:MGI:1329012]	0.312881
Cdcp1	CUB domain containing protein 1 [Source:MGI Symbol;Acc:MGI:2442010]	0.311156
Fbxo32	F-box protein 32 [Source:MGI Symbol;Acc:MGI:1914981]	0.310864
Mlkl	mixed lineage kinase domain-like [Source:MGI Symbol;Acc:MGI:1921818]	0.310426
Bbx	bobby sox homolog (Drosophila) [Source:MGI Symbol;Acc:MGI:1917758]	0.308889
Rbm46	RNA binding motif protein 46 [Source:MGI Symbol;Acc:MGI:3645057]	0.308601
Fam83f	family with sequence similarity 83, member F [Source:MGI Symbol;Acc:MGI:2146227]	0.308572
Dnase1l3	deoxyribonuclease 1-like 3 [Source:MGI Symbol;Acc:MGI:1314633]	0.306616
Tle2	predicted gene 15917 [Source:MGI Symbol;Acc:MGI:3801972]	0.305622
Tacstd2	tumor-associated calcium signal transducer 2 [Source:MGI Symbol;Acc:MGI:1861606]	0.305519
Gchfr	GTP cyclohydrolase I feedback regulator [Source:MGI Symbol;Acc:MGI:2443977]	0.300805
Tmc8	transmembrane channel-like gene family 6 [Source:MGI Symbol;Acc:MGI:1098686]	0.300048
Cxcr2	chemokine (C-X-C motif) receptor 2 [Source:MGI Symbol;Acc:MGI:105303]	0.299033
Plk3	Tctex1 domain containing 4 [Source:MGI Symbol;Acc:MGI:3045358]	0.298751
4931414P19Rik	RIKEN cDNA 4931414P19 gene [Source:MGI Symbol;Acc:MGI:1921609]	0.298488
Rimklb	ribosomal modification protein rimK-like family member B [Source:MGI Symbol;Acc:MGI:1918325]	0.29706
Rufy4	RUN and FYVE domain containing 4 [Source:MGI Symbol;Acc:MGI:3588214]	0.290936
Slc39a14	solute carrier family 39 (zinc transporter), member 14 [Source:MGI Symbol;Acc:MGI:2384851]	0.288149
Syna	syncytin a [Source:MGI Symbol;Acc:MGI:2684898]	0.287742
Ptpn21	protein tyrosine phosphatase, non-receptor type 21 [Source:MGI Symbol;Acc:MGI:1344406]	0.286779
Nppb	natriuretic peptide type B [Source:MGI Symbol;Acc:MGI:97368]	0.283842
Mycbpap	MYCBP associated protein [Source:MGI Symbol;Acc:MGI:2388726]	0.282676
Mfsd7c	major facilitator superfamily domain containing 7C [Source:MGI Symbol;Acc:MGI:2384974]	0.274701
Sbsn	suprabasin [Source:MGI Symbol;Acc:MGI:2446326]	0.273034
Fhad1	predicted gene 13643 [Source:MGI Symbol;Acc:MGI:3651870]	0.272867
Syt8	synaptotagmin VIII [Source:MGI Symbol;Acc:MGI:1859867]	0.270267
Mansc1	MANSC domain containing 1 [Source:MGI Symbol;Acc:MGI:1914979]	0.269814
Plekhg6	pleckstrin homology domain containing, family G (with RhoGef domain) member 6 [Source:MGI Symbol;Acc:MGI:2682298]	0.269287
Klhdc1	kelch domain containing 1 [Source:MGI Symbol;Acc:MGI:2672853]	0.267441
Irf6	interferon regulatory factor 6 [Source:MGI Symbol;Acc:MGI:1859211]	0.267293
Capg	capping protein (actin filament), gelsolin-like [Source:MGI Symbol;Acc:MGI:1098259]	0.266475
Igtp	interferon gamma induced GTPase [Source:MGI Symbol;Acc:MGI:107729]	0.265545
5033414D02Rik	RIKEN cDNA 5033414D02 gene [Source:MGI Symbol;Acc:MGI:1915009]	0.261429
Smagp	small cell adhesion glycoprotein [Source:MGI Symbol;Acc:MGI:2448476]	0.26119
Aim1l	absent in melanoma 1-like [Source:MGI Symbol;Acc:MGI:1334463]	0.257673
Tnfrsf1a	tumor necrosis factor receptor superfamily, member 1a [Source:MGI Symbol;Acc:MGI:1314884]	0.254329
Mtap9	microtubule-associated protein 9 [Source:MGI Symbol;Acc:MGI:2442208]	0.253619
Tfpi	tissue factor pathway inhibitor [Source:MGI Symbol;Acc:MGI:1095418]	0.249211
A230050P20Rik	RIKEN cDNA A230050P20 gene [Source:MGI Symbol;Acc:MGI:2441788]	0.248606
Foxj2	forkhead box J2 [Source:MGI Symbol;Acc:MGI:1926805]	0.248349
Pkd2l1	polycystic kidney disease 2-like 1 [Source:MGI Symbol;Acc:MGI:1352448]	0.247917
Tns4	tensin 4 [Source:MGI Symbol;Acc:MGI:2144377]	0.247346
Dock8	dedicator of cytokinesis 8 [Source:MGI Symbol;Acc:MGI:1921396]	0.24734
Il17re	interleukin 17 receptor E [Source:MGI Symbol;Acc:MGI:1889371]	0.246323
Ocln	occludin [Source:MGI Symbol;Acc:MGI:106183]	0.245813
Nudt8	nudix (nucleoside diphosphate linked moiety X)-type motif 8 [Source:MGI Symbol;Acc:MGI:1913637]	0.244964
Mfsd7a	major facilitator superfamily domain containing 7A [Source:MGI Symbol;Acc:MGI:2442629]	0.242206
Klk6	kallikrein related-peptidase 6 [Source:MGI Symbol;Acc:MGI:1343166]	0.241248
Spata24	spermatogenesis associated 24 [Source:MGI Symbol;Acc:MGI:1918492]	0.239779
Slc6a12	solute carrier family 6 (neurotransmitter transporter, betaine/GABA), member 12 [Source:MGI Symbol;Acc:MGI:95628]	0.236953
Retsat	retinol saturase (all trans retinol 13,14 reductase) [Source:MGI Symbol;Acc:MGI:1914692]	0.236827
Doc2g	nudix (nucleoside diphosphate linked moiety X)-type motif 8 [Source:MGI Symbol;Acc:MGI:1913637]	0.234317
Il28ra	interleukin 28 receptor alpha [Source:MGI Symbol;Acc:MGI:2429859]	0.23374
Spnb4	predicted gene 20479 [Source:MGI Symbol;Acc:MGI:5141944]	0.231196
Prrg4	proline rich Gla (G-carboxyglutamic acid) 4 (transmembrane) [Source:MGI Symbol;Acc:MGI:2442211]	0.228092
Ifih1	interferon induced with helicase C domain 1 [Source:MGI Symbol;Acc:MGI:1918836]	0.224199
Gm648	predicted gene 648 [Source:MGI Symbol;Acc:MGI:2685494]	0.223924
Csf1r	colony stimulating factor 1 receptor [Source:MGI Symbol;Acc:MGI:1339758]	0.223034
A430105I19Rik	RIKEN cDNA A430105I19 gene [Source:MGI Symbol;Acc:MGI:2685199]	0.222429
Tmem30b	transmembrane protein 30B [Source:MGI Symbol;Acc:MGI:2442082]	0.22174
2210020M01Rik	RecQ protein-like 5 [Source:MGI Symbol;Acc:MGI:2156841]	0.21991
Ltf	lactotransferrin [Source:MGI Symbol;Acc:MGI:96837]	0.219904
Rnf144b	ring finger protein 144B [Source:MGI Symbol;Acc:MGI:2384986]	0.219343
Ptrh1	peptidyl-tRNA hydrolase 1 homolog (S. cerevisiae) [Source:MGI Symbol;Acc:MGI:1913779]	0.217648
Upk2	uroplakin 2 [Source:MGI Symbol;Acc:MGI:98913]	0.210204
Fndc4	fibronectin type III domain containing 4 [Source:MGI Symbol;Acc:MGI:1917195]	0.208249
Eng	adenylate kinase 1 [Source:MGI Symbol;Acc:MGI:87977]	0.208009
Rnf43	ring finger protein 43 [Source:MGI Symbol;Acc:MGI:2442609]	0.205696
Plbd1	phospholipase B domain containing 1 [Source:MGI Symbol;Acc:MGI:1914107]	0.205557
Ctsr	cathepsin R [Source:MGI Symbol;Acc:MGI:1861723]	0.205085
Clic5	chloride intracellular channel 5 [Source:MGI Symbol;Acc:MGI:1917912]	0.204195
Gpr97	G protein-coupled receptor 97 [Source:MGI Symbol;Acc:MGI:1859670]	0.203308
Phactr1	phosphatase and actin regulator 1 [Source:MGI Symbol;Acc:MGI:2659021]	0.203092
Prom2	prominin 2 [Source:MGI Symbol;Acc:MGI:2138997]	0.199942
Cst6	cystatin E/M [Source:MGI Symbol;Acc:MGI:1920970]	0.199044
3010003L21Rik	family with sequence similarity 60, member A [Source:MGI Symbol;Acc:MGI:1929091]	0.197014
Vamp5	vesicle-associated membrane protein 5 [Source:MGI Symbol;Acc:MGI:1858622]	0.193963
B230312A22Rik	RIKEN cDNA B230312A22 gene [Source:MGI Symbol;Acc:MGI:2441854]	0.192999
Mid2	midline 2 [Source:MGI Symbol;Acc:MGI:1344333]	0.192291
Cxcl16	chemokine (C-X-C motif) ligand 16 [Source:MGI Symbol;Acc:MGI:1932682]	0.190036
Afap1l1	actin filament associated protein 1-like 1 [Source:MGI Symbol;Acc:MGI:2147199]	0.185744
Klk4	kallikrein related-peptidase 4 (prostase, enamel matrix, prostate) [Source:MGI Symbol;Acc:MGI:1861379]	0.184663
Ldb3	LIM domain binding 3 [Source:MGI Symbol;Acc:MGI:1344412]	0.180194
Tbc1d4	TBC1 domain family, member 4 [Source:MGI Symbol;Acc:MGI:2429660]	0.180023
Kcnh2	potassium voltage-gated channel, subfamily H (eag-related), member 2 [Source:MGI Symbol;Acc:MGI:1341722]	0.179748
Bfsp1	beaded filament structural protein 1, in lens-CP94 [Source:MGI Symbol;Acc:MGI:101770]	0.175353
Art4	ADP-ribosyltransferase 4 [Source:MGI Symbol;Acc:MGI:1202710]	0.16714
Slc39a4	solute carrier family 39 (zinc transporter), member 4 [Source:MGI Symbol;Acc:MGI:1919277]	0.165375
Myo1g	myosin IG [Source:MGI Symbol;Acc:MGI:1927091]	0.163032
Cyp11a1	cytochrome P450, family 11, subfamily a, polypeptide 1 [Source:MGI Symbol;Acc:MGI:88582]	0.162249
Acvrl1	activin A receptor, type II-like 1 [Source:MGI Symbol;Acc:MGI:1338946]	0.161499
Isg20	interferon-stimulated protein [Source:MGI Symbol;Acc:MGI:1928895]	0.150084
Fosb	FBJ osteosarcoma oncogene B [Source:MGI Symbol;Acc:MGI:95575]	0.147932
Tmem62	transmembrane protein 62 [Source:MGI Symbol;Acc:MGI:2139461]	0.14249
Car11	carbonic anhydrase 11 [Source:MGI Symbol;Acc:MGI:1336193]	0.141072
Cdx1	caudal type homeobox 1 [Source:MGI Symbol;Acc:MGI:88360]	0.134168
Cx3cl1	chemokine (C-X3-C motif) ligand 1 [Source:MGI Symbol;Acc:MGI:1097153]	0.133983
Tdrkh	tudor and KH domain containing protein [Source:MGI Symbol;Acc:MGI:1919884]	0.133785
Ttc21a	chemokine (C-X3-C) receptor 1 [Source:MGI Symbol;Acc:MGI:1333815]	0.132902
Ubxn11	UBX domain protein 11 [Source:MGI Symbol;Acc:MGI:1914836]	0.12626
Gjb2	gap junction protein, beta 2 [Source:MGI Symbol;Acc:MGI:95720]	0.125544
Gm5918	predicted gene 20510 [Source:MGI Symbol;Acc:MGI:5141975]	0.125354
Nrn1	neuritin 1 [Source:MGI Symbol;Acc:MGI:1915654]	0.122733
Myo7b	myosin VIIB [Source:MGI Symbol;Acc:MGI:107709]	0.121137
Cldn23	claudin 23 [Source:MGI Symbol;Acc:MGI:1919158]	0.117568
Ripk3	receptor-interacting serine-threonine kinase 3 [Source:MGI Symbol;Acc:MGI:2154952]	0.112703
Atg9b	nitric oxide synthase 3, endothelial cell [Source:MGI Symbol;Acc:MGI:97362]	0.104669
Kcnj10	potassium inwardly-rectifying channel, subfamily J, member 10 [Source:MGI Symbol;Acc:MGI:1194504]	0.098339
Slc2a5	solute carrier family 2 (facilitated glucose transporter), member 5 [Source:MGI Symbol;Acc:MGI:1928369]	0.0958187
Dmrtc1a	DMRT-like family C1a [Source:MGI Symbol;Acc:MGI:1918137]	0.0751386
Mns1	meiosis-specific nuclear structural protein 1 [Source:MGI Symbol;Acc:MGI:107933]	0.0737646
Igf2bp3	RIKEN cDNA 2410003K15 gene [Source:MGI Symbol;Acc:MGI:1922843]	0.0687232
Ap3b2	adaptor-related protein complex 3, beta 2 subunit [Source:MGI Symbol;Acc:MGI:1100869]	0.0642736
C330005M16Rik	RIKEN cDNA C330005M16 gene [Source:MGI Symbol;Acc:MGI:2142121]	0.0595645
Tmem139	transmembrane protein 139 [Source:MGI Symbol;Acc:MGI:1924444]	0.0580922
Zscan10	zinc finger and SCAN domain containing 10 [Source:MGI Symbol;Acc:MGI:3040700]	0.0490606
Apobec3	apolipoprotein B mRNA editing enzyme, catalytic polypeptide 3 [Source:MGI Symbol;Acc:MGI:1933111]	0.0404076
Sec14l4	SEC14-like 4 (S. cerevisiae) [Source:MGI Symbol;Acc:MGI:2144095]	0.0308864
B3gnt3	UDP-GlcNAc:betaGal beta-1,3-N-acetylglucosaminyltransferase 3 [Source:MGI Symbol;Acc:MGI:2152535]	0.025459

## Sheet: DESeq2_and_intDiff<0.05_3D
81 genes dysregulated in Bap1 KO mTSC during differentiation (3d), called by both DESeq2 and intensity difference p<0.05
Probe	Description	Fold change
Ptgs2	prostaglandin-endoperoxide synthase 2 [Source:MGI Symbol;Acc:MGI:97798]	616.41
Myl9	myosin, light polypeptide 9, regulatory [Source:MGI Symbol;Acc:MGI:2138915]	316.231
Acta2	actin, alpha 2, smooth muscle, aorta [Source:MGI Symbol;Acc:MGI:87909]	276.986
Acta1	predicted gene 20388 [Source:MGI Symbol;Acc:MGI:5141853]	70.0884
Mrc2	mannose receptor, C type 2 [Source:MGI Symbol;Acc:MGI:107818]	38.1554
Tagln	proprotein convertase subtilisin/kexin type 7 [Source:MGI Symbol;Acc:MGI:107421]	22.5765
Limch1	LIM and calponin homology domains 1 [Source:MGI Symbol;Acc:MGI:1924819]	21.9076
Gulp1	GULP, engulfment adaptor PTB domain containing 1 [Source:MGI Symbol;Acc:MGI:1920407]	17.9779
Vcan	versican [Source:MGI Symbol;Acc:MGI:102889]	17.7657
Uchl1	predicted gene, 16832 [Source:MGI Symbol;Acc:MGI:4439756]	16.7185
Gpc4	glypican 4 [Source:MGI Symbol;Acc:MGI:104902]	15.7938
Ephb2	Eph receptor B2 [Source:MGI Symbol;Acc:MGI:99611]	12.4518
Dlk1	delta-like 1 homolog (Drosophila) [Source:MGI Symbol;Acc:MGI:94900]	12.4364
Timp3	synapsin III [Source:MGI Symbol;Acc:MGI:1351334]	12.2615
Thbs1	thrombospondin 1 [Source:MGI Symbol;Acc:MGI:98737]	12.1877
Fbn1	fibrillin 1 [Source:MGI Symbol;Acc:MGI:95489]	11.562
Chrna4	cholinergic receptor, nicotinic, alpha polypeptide 4 [Source:MGI Symbol;Acc:MGI:87888]	11.4805
Prss23	protease, serine, 23 [Source:MGI Symbol;Acc:MGI:1923703]	10.805
Rragd	Ras-related GTP binding D [Source:MGI Symbol;Acc:MGI:1098604]	10.7788
Sh3bgrl	SH3-binding domain glutamic acid-rich protein like [Source:MGI Symbol;Acc:MGI:1930849]	10.656
Mtap1a	microtubule-associated protein 1 A [Source:MGI Symbol;Acc:MGI:1306776]	9.8829
Lpl	lipoprotein lipase [Source:MGI Symbol;Acc:MGI:96820]	9.8651
Mest	mesoderm specific transcript [Source:MGI Symbol;Acc:MGI:96968]	9.81695
Igfbp2	insulin-like growth factor binding protein 2 [Source:MGI Symbol;Acc:MGI:96437]	9.59856
Kalrn	kalirin, RhoGEF kinase [Source:MGI Symbol;Acc:MGI:2685385]	8.50666
Tcfl5	collagen, type IX, alpha 3 [Source:MGI Symbol;Acc:MGI:894686]	8.40093
Ncs1	neuronal calcium sensor 1 [Source:MGI Symbol;Acc:MGI:109166]	7.43445
Clstn1	calsyntenin 1 [Source:MGI Symbol;Acc:MGI:1929895]	6.57362
Lama1	laminin, alpha 1 [Source:MGI Symbol;Acc:MGI:99892]	6.25668
Zdbf2	No description	6.13201
Ece1	endothelin converting enzyme 1 [Source:MGI Symbol;Acc:MGI:1101357]	5.85666
Chst8	carbohydrate (N-acetylgalactosamine 4-0) sulfotransferase 8 [Source:MGI Symbol;Acc:MGI:1916197]	5.42171
H19	H19 fetal liver mRNA [Source:MGI Symbol;Acc:MGI:95891]	5.19054
Mdk	cholinergic receptor, muscarinic 4 [Source:MGI Symbol;Acc:MGI:88399]	4.99552
Gprasp1	armadillo repeat containing, X-linked 5 [Source:MGI Symbol;Acc:MGI:2148026]	4.97589
Wnt7b	wingless-related MMTV integration site 7B [Source:MGI Symbol;Acc:MGI:98962]	4.65541
Cadm1	cell adhesion molecule 1 [Source:MGI Symbol;Acc:MGI:1889272]	4.45034
Vegfa	vascular endothelial growth factor A [Source:MGI Symbol;Acc:MGI:103178]	4.22432
Fgfr2	fibroblast growth factor receptor 2 [Source:MGI Symbol;Acc:MGI:95523]	4.04661
Vav3	vav 3 oncogene [Source:MGI Symbol;Acc:MGI:1888518]	3.46255
Htra1	fibroblast growth factor receptor 2 [Source:MGI Symbol;Acc:MGI:95523]	3.38424
Mt2	metallothionein 2 [Source:MGI Symbol;Acc:MGI:97172]	3.3017
Id2	inhibitor of DNA binding 2 [Source:MGI Symbol;Acc:MGI:96397]	3.14664
Anxa6	annexin A6 [Source:MGI Symbol;Acc:MGI:88255]	3.09643
Slc7a6	solute carrier family 7 (cationic amino acid transporter, y+ system), member 6 [Source:MGI Symbol;Acc:MGI:2142598]	3.0445
Zfp462	zinc finger protein 462 [Source:MGI Symbol;Acc:MGI:107690]	2.98939
Glipr2	GLI pathogenesis-related 2 [Source:MGI Symbol;Acc:MGI:1917770]	2.91354
Kitl	kit ligand [Source:MGI Symbol;Acc:MGI:96974]	2.84517
Igsf3	immunoglobulin superfamily, member 3 [Source:MGI Symbol;Acc:MGI:1926158]	2.75551
Cxadr	coxsackie virus and adenovirus receptor [Source:MGI Symbol;Acc:MGI:1201679]	2.75396
Plxna2	plexin A2 [Source:MGI Symbol;Acc:MGI:107684]	2.73747
Grlf1	glucocorticoid receptor DNA binding factor 1 [Source:MGI Symbol;Acc:MGI:1929494]	2.65625
Ski	ski sarcoma viral oncogene homolog (avian) [Source:MGI Symbol;Acc:MGI:98310]	2.6246
Rhoq	ras homolog gene family, member Q [Source:MGI Symbol;Acc:MGI:1931553]	2.56628
Itgb5	integrin beta 5 [Source:MGI Symbol;Acc:MGI:96614]	2.41974
Arhgef6	Rac/Cdc42 guanine nucleotide exchange factor (GEF) 6 [Source:MGI Symbol;Acc:MGI:1920591]	0.443057
Ctsl	cathepsin L [Source:MGI Symbol;Acc:MGI:88564]	0.420305
Pparg	peroxisome proliferator activated receptor gamma [Source:MGI Symbol;Acc:MGI:97747]	0.38667
Serpinb9b	serine (or cysteine) peptidase inhibitor, clade B, member 9b [Source:MGI Symbol;Acc:MGI:894668]	0.359346
Cdcp1	CUB domain containing protein 1 [Source:MGI Symbol;Acc:MGI:2442010]	0.311156
Bbx	bobby sox homolog (Drosophila) [Source:MGI Symbol;Acc:MGI:1917758]	0.308889
Plk3	Tctex1 domain containing 4 [Source:MGI Symbol;Acc:MGI:3045358]	0.298751
Slc39a14	solute carrier family 39 (zinc transporter), member 14 [Source:MGI Symbol;Acc:MGI:2384851]	0.288149
Syna	syncytin a [Source:MGI Symbol;Acc:MGI:2684898]	0.287742
Sbsn	suprabasin [Source:MGI Symbol;Acc:MGI:2446326]	0.273034
Capg	capping protein (actin filament), gelsolin-like [Source:MGI Symbol;Acc:MGI:1098259]	0.266475
Tfpi	tissue factor pathway inhibitor [Source:MGI Symbol;Acc:MGI:1095418]	0.249211
Foxj2	forkhead box J2 [Source:MGI Symbol;Acc:MGI:1926805]	0.248349
Tns4	tensin 4 [Source:MGI Symbol;Acc:MGI:2144377]	0.247346
Csf1r	colony stimulating factor 1 receptor [Source:MGI Symbol;Acc:MGI:1339758]	0.223034
Eng	adenylate kinase 1 [Source:MGI Symbol;Acc:MGI:87977]	0.208009
Plbd1	phospholipase B domain containing 1 [Source:MGI Symbol;Acc:MGI:1914107]	0.205557
Phactr1	phosphatase and actin regulator 1 [Source:MGI Symbol;Acc:MGI:2659021]	0.203092
B230312A22Rik	RIKEN cDNA B230312A22 gene [Source:MGI Symbol;Acc:MGI:2441854]	0.192999
Cyp11a1	cytochrome P450, family 11, subfamily a, polypeptide 1 [Source:MGI Symbol;Acc:MGI:88582]	0.162249
Acvrl1	activin A receptor, type II-like 1 [Source:MGI Symbol;Acc:MGI:1338946]	0.161499
Cx3cl1	chemokine (C-X3-C motif) ligand 1 [Source:MGI Symbol;Acc:MGI:1097153]	0.133983
Gjb2	gap junction protein, beta 2 [Source:MGI Symbol;Acc:MGI:95720]	0.125544
Dmrtc1a	DMRT-like family C1a [Source:MGI Symbol;Acc:MGI:1918137]	0.0751386
Igf2bp3	RIKEN cDNA 2410003K15 gene [Source:MGI Symbol;Acc:MGI:1922843]	0.0687232
B3gnt3	UDP-GlcNAc:betaGal beta-1,3-N-acetylglucosaminyltransferase 3 [Source:MGI Symbol;Acc:MGI:2152535]	0.025459
