# Supplementary material for: BAP1/ASXL complex modulation regulates epithelial-mesenchymal transition during trophoblast differentiation and invasion
Source: eLife. 2021 Jun 25;10:e63254. doi: 10.7554/eLife.63254 (PMC8233037; doi:10.7554/eLife.63254)
Supplement: Supplementary file 2. [file elife-63254-supp2.xlsx]

## Sheet: DAVID_0D
Category	Term	Count	%	PValue	Genes	List Total	Pop Hits	Pop Total	Fold Enrichment	Bonferroni	Benjamini	FDR
UP_KEYWORDS	Glycoprotein	199	27.2603	4.47698e-21	CADM4, LTBP1, PTGS2, EFNA1, OSMR, LTBP4, ADCY5, FST, FSTL3, ADORA1, AQP3, HMCN2, S1PR3, ERO1LB, SERPINE2, SEMA7A, SERPINE1, CHRNA4, GGTA1, CDH23, PTPRJ, MATN2, LRRC4, MATN1, PTPRN, ADAMTS8, KRT18, TACSTD2, ARXES2, TFPI, PDGFRA, TMEM170B, LAMC2, EIF2AK3, NRN1, CD74, SORCS2, SIAE, LAMB2, PROCR, NAGA, PLTP, TMEM120A, PCDH12, LAMA1, SEMA6B, FJX1, PON2, TMEM119, BMP6, ACVRL1, GPR161, ARSI, PPARG, H2-D…	717	1797	12297	1.89926	1.41473e-18	1.41473e-18	6.02998e-18
UP_SEQ_FEATURE	glycosylation site:N-linked (GlcNAc...)	182	24.9315	8.94724e-21	LTBP1, CADM4, PTGS2, OSMR, EFNA1, PLXNA2, ADCY5, LTBP4, FST, TGFB3, FSTL3, TLR2, LRRC4B, IL17RE, ADORA1, TGFB1, IL17RA, MMRN2, S1PR3, ERO1LB, SLC2A5, WNT3, SERPINE2, SEMA7A, B3GALNT1, SERPINE1, CHRNA4, PDGFD, GGTA1, A3GALT2, CDH23, LRRC4, MATN2, PTPRJ, MATN1, PTPRN, THBD, ADAMTS8, TACSTD2, LRP11, ARXES2, TFPI, PDGFRA, TMEM170B, LAMC2, EIF2AK3, SLC40A1, MYH7B, WNT5B, CYSLTR1, ITGB3, EXTL1, CD74, S…	641	1621	11138	1.95091	1.59529e-17	1.59529e-17	1.51768e-17
UP_SEQ_FEATURE	signal peptide	152	20.8219	1.47296e-18	LTBP1, CADM4, PTGS2, OSMR, EFNA1, PLXNA2, LTBP4, FST, TGFB3, TLR2, LRRC4B, FSTL3, IL17RE, DNASE1L3, TGFB1, IL17RA, MMRN2, ERO1LB, WNT3, SERPINE2, SEMA7A, SBSN, SERPINE1, CHRNA4, PDGFD, A3GALT2, CDH23, LRRC4, MATN2, PTPRJ, MATN1, PTPRN, TNS4, THBD, ADAMTS8, TACSTD2, LRP11, TFPI, PDGFRA, LAMC2, EIF2AK3, WFDC2, WNT5B, ITGB3, NRN1, MDK, SORCS2, SIAE, IL12RB1, LAMB2, PROCR, NAGA, MFAP3L, ANGPTL2, PLTP…	641	1304	11138	2.02542	2.62628e-15	1.31314e-15	2.49852e-15
UP_KEYWORDS	Signal	181	24.7945	2.50463e-17	APOBEC3, CADM4, LTBP1, PTGS2, PLXNA2, OSMR, EFNA1, LTBP4, FST, TGFB3, FSTL3, LRRC4B, TLR2, IL17RE, DNASE1L3, TGFB1, IL17RA, MMRN2, HMCN2, ERO1LB, WNT3, SERPINE2, SEMA7A, SBSN, A430033K04RIK, SERPINE1, CHRNA4, PDGFD, CDH23, LRRC4, MATN2, PTPRJ, MATN1, PDE4D, D430041D05RIK, PTPRN, TNS4, THBD, ADAMTS8, TACSTD2, LRP11, TFPI, PDGFRA, LAMC2, EIF2AK3, WFDC2, WNT5B, TFEB, ITGB3, EXTL1, NRN1, MDK, SORCS2,…	717	1695	12297	1.83142	7.91462e-15	3.95731e-15	3.37345e-14
UP_KEYWORDS	Disulfide bond	134	18.3562	9.73732e-14	LTBP1, CADM4, PTGS2, OSMR, EFNA1, PLXNA2, LTBP4, FST, TGFB3, TLR2, LRRC4B, FSTL3, DNASE1L3, ADORA1, TGFB1, IL17RA, MMRN2, HMCN2, ERO1LB, WNT3, SEMA7A, CHRNA4, PDGFD, HMGCL, RAB27A, LRRC4, MATN2, MATN1, PTPRN, THBD, ADAMTS8, TACSTD2, LRP11, TFPI, PDGFRA, LAMC2, WFDC2, KALRN, WNT5B, CYSLTR1, ITGB3, EXTL1, MDK, CD74, SIAE, LAMB2, IL12RB1, PROCR, NAGA, MFAP3L, ENTPD1, ANGPTL2, PLTP, LRFN3, CSF1R, LPL…	717	1205	12297	1.90721	3.07678e-11	1.02559e-11	1.3114e-10
UP_SEQ_FEATURE	disulfide bond	110	15.0685	6.03043e-14	LTBP1, CADM4, PTGS2, EFNA1, OSMR, LTBP4, FST, TLR2, LRRC4B, FSTL3, TGFB3, DNASE1L3, ADORA1, TGFB1, MMRN2, ERO1LB, SEMA7A, CHRNA4, PDGFD, RAB27A, MATN2, LRRC4, MATN1, ADAMTS8, THBD, TACSTD2, LRP11, PDGFRA, TFPI, LAMC2, WFDC2, KALRN, CYSLTR1, ITGB3, EXTL1, MDK, CD74, LAMB2, IL12RB1, PROCR, NAGA, MFAP3L, ANGPTL2, PLTP, LRFN3, CSF1R, LPL, LGALS3, MRC2, LAMA1, SEMA6B, ITGA6, TMEM8B, ST8SIA4, CXCL16, P…	641	916	11138	2.08663	1.07488e-10	3.58295e-11	1.02263e-10
GOTERM_CC_DIRECT	GO:0005886~plasma membrane	199	27.2603	5.55701e-12	SGMS2, EFNA1, RUSC1, ADCY5, ADORA1, AQP3, S1PR3, DIRAS2, ATP2B4, SEMA7A, CHRNA4, CDH23, GNG7, PTPRJ, PIK3CG, LRRC4, PLD2, SPIRE2, MYH9, PTPRN, TACSTD2, PDGFRA, DBN1, UNC13B, OAS3, RUNDC3A, AFAP1L2, AFAP1L1, PXK, NRN1, CD74, FCHO1, GPR157, KLF9, PCDH12, DAGLB, ZBTB42, SEMA6B, RGS2, PKP3, PON2, TMEM119, SLC27A1, ACVRL1, GPR161, H2-D1, GJA1, CDCP1, KCNJ10, SMPDL3B, NOS3, ERRFI1, GHR, FMNL1, MMP16, E…	666	2183	11424	1.56366	2.45619e-09	2.45619e-09	7.86349e-09
GOTERM_CC_DIRECT	GO:0005615~extracellular space	79	10.8219	6.70021e-12	AEBP1, LTBP1, LTBP4, LEPR, FSTL3, TGFB3, VGF, TGFB1, MMRN2, GPC4, SCT, METRN, WNT3, SERPINE2, SMPDL3B, GSN, CLCF1, SEMA3G, SERPINE1, SEPP1, PDGFD, GHR, CTSR, TLE2, STOM, CTSJ, THBD, PLEKHH3, SEMA4F, TACSTD2, TFPI, LAMC2, VCAN, CTSH, LCP1, GSTP1, WNT5B, REN1, ADAMTS15, SSH2, PLBD1, SERPINB1A, OAS3, COL2A1, KIT, GPRC5B, NRN1, CALCA, SIAE, SERPINB9B, COL6A2, ENTPD1, THBS1, SERPINB9G, SERPINB9F, PLTP…	666	596	11424	2.27366	2.96149e-09	1.48074e-09	9.48118e-09
UP_KEYWORDS	Cell membrane	141	19.3151	5.50139e-11	SGMS2, EFNA1, PLXNA2, RUSC1, ADCY5, TLR2, LRRC4B, IL17RE, ADORA1, IL17RA, S1PR3, SLC2A5, DIRAS2, ATP2B4, SEMA7A, CHRNA4, MLKL, SPRED1, CIB2, CDH23, GNG7, LRRC4, PTPRJ, PIK3CG, PSD4, PDE4D, SPIRE2, PTPRN, PDGFRA, RIPK3, DSP, SLC40A1, CYSLTR1, BBS9, STK10, PHKA1, ITGB3, PXK, NRN1, KCNS1, TMEM30B, NDRG1, MFAP3L, LRFN3, CSF1R, HCN2, LPL, RAB8B, GPR157, PODXL, PCDH12, TPBG, DAGLB, SEMA6B, SLC4A11, DSG…	717	1408	12297	1.7175	1.73844e-08	4.34611e-09	7.40976e-08
UP_SEQ_FEATURE	topological domain:Cytoplasmic	141	19.3151	2.22379e-11	CADM4, SGMS2, OSMR, PLXNA2, ADCY5, TLR2, IL17RE, ADORA1, AQP3, IL17RA, S1PR3, SLC2A5, B3GALNT1, CHRNA4, GGTA1, CDH23, LRRC4, PTPRJ, ATG9B, PTPRN, ATP2C2, THBD, TACSTD2, LRP11, ARXES2, PDGFRA, TMEM170B, EIF2AK3, MYH7B, CYSLTR1, ITGB3, EXTL1, SORCS2, CD74, PAQR5, KCNS1, IL12RB1, PROCR, SLC30A4, B3GNT3, MFAP3L, ENTPD1, LRFN3, CSF1R, TMEM120A, HCN2, GPR157, CCPG1, UST, PODXL, SYT11, MRC2, PCDH12, TPB…	641	1417	11138	1.72901	3.96501e-08	9.91253e-09	3.77212e-08
UP_KEYWORDS	Secreted	74	10.137	1.85391e-10	AEBP1, LTBP1, EFNA1, LTBP4, LEPR, FST, ARSI, FSTL3, TGFB3, IL17RE, DNASE1L3, TGFB1, MMRN2, GPC4, HMCN2, SCT, CGREF1, METRN, WNT3, CILP2, SMPDL3B, SERPINE2, GSN, CLCF1, SEMA3G, SBSN, SERPINE1, SEPP1, PDGFD, GHR, MATN2, MATN1, VASH2, ADAMTS8, TFPI, VCAN, LAMC2, WFDC2, WNT5B, REN1, CRLF2, ADAMTS15, COL2A1, NMB, MDK, CALCA, SMOC2, LAMB2, COL6A2, FBN2, ANGPTL2, PRSS12, PLTP, THPO, LPL, HAPLN4, LGALS3,…	717	577	12297	2.19956	5.85836e-08	1.17167e-08	2.49701e-07
UP_SEQ_FEATURE	topological domain:Extracellular	105	14.3836	7.6893e-11	CADM4, OSMR, PLXNA2, ADCY5, TLR2, IL17RE, ADORA1, AQP3, IL17RA, S1PR3, SLC2A5, CHRNA4, CDH23, PTPRJ, LRRC4, PTPRN, ATP2C2, THBD, TACSTD2, LRP11, PDGFRA, TMEM170B, MYH7B, CYSLTR1, ITGB3, CD74, PAQR5, IL12RB1, PROCR, MFAP3L, ENTPD1, LRFN3, CSF1R, TMEM120A, GPR157, PODXL, MRC2, PCDH12, TPBG, DAGLB, SEMA6B, FAM198B, ITGA6, TMEM8B, DSG2, CXCL16, CACNA1H, TMEM119, CACNA1C, SLC27A1, CLDN7, IGDCC4, SLC5A…	641	958	11138	1.90446	1.371e-07	2.74201e-08	1.30431e-07
GOTERM_CC_DIRECT	GO:0005576~extracellular region	76	10.411	1.67804e-09	AEBP1, LTBP1, EFNA1, LTBP4, LEPR, FST, ARSI, FSTL3, TGFB3, IL17RE, VGF, TGFB1, MMRN2, GPC4, HMCN2, SCT, CGREF1, METRN, WNT3, CILP2, SERPINE2, SMPDL3B, GSN, CLCF1, SEMA3G, SBSN, SERPINE1, SEPP1, PDGFD, GHR, MATN2, MATN1, VASH2, ADAMTS8, TFPI, VCAN, LAMC2, WFDC2, WNT5B, REN1, CRLF2, ADAMTS15, COL2A1, NMB, MDK, CALCA, SMOC2, LAMB2, PRRG4, COL6A2, FBN2, THBS1, ANGPTL2, PRSS12, PLTP, THPO, LPL, HAPLN4…	666	631	11424	2.06599	7.41693e-07	2.47231e-07	2.37453e-06
GOTERM_CC_DIRECT	GO:0005887~integral component of plasma membrane	56	7.67123	1.23353e-07	LRRC8E, IGDCC4, SLC5A5, CADM4, ACVRL1, CLDN4, SGMS2, OSMR, PLXNA2, LEPR, KCNJ10, IL17RE, NRADD, KCNK13, IL17RA, AQP3, S1PR3, ACVR1B, ATP2B4, SLC2A5, KCNK6, SLC43A1, GHR, MMP16, AMIGO1, STOM, ATP2C2, THBD, TACSTD2, CD82, PDGFRA, KCNH2, CYSLTR1, APH1C, CDH4, CD74, HRH1, SLCO3A1, SLC39A4, GPNMB, HCN2, LRRN4, SYT11, MRC2, TMEM8, PCDH12, NPR2, TSPAN17, KCNN4, SLC16A5, SEMA6B, SLC4A11, PROM2, ATP2A3, S…	666	451	11424	2.12988	5.45204e-05	1.36304e-05	0.000174551
GOTERM_CC_DIRECT	GO:0005578~proteinaceous extracellular matrix	28	3.83562	4.36029e-07	LTBP1, WNT5B, LTBP4, ADAMTS15, TGFB3, COL2A1, TGFB1, MMRN2, GPC4, HMCN2, SMOC2, WNT3, CILP2, LAMB2, COL6A2, TGM2, FBN2, MATN2, HAPLN4, LGALS3, MATN1, ANXA2, LAMA1, SOST, ADAMTS8, KAZALD1, VCAN, LAMC2	666	159	11424	3.02068	0.000192706	3.85442e-05	0.000617006
UP_KEYWORDS	Extracellular matrix	23	3.15068	1.02391e-06	HAPLN4, WNT5B, LTBP4, ADAMTS15, MATN1, COL2A1, COL5A3, TGFB1, MMRN2, ANXA2, HMCN2, LAMA1, SMOC2, WNT3, LAMB2, ADAMTS8, SOST, CILP2, KAZALD1, COL6A2, LAMC2, VCAN, FBN2	717	118	12297	3.34292	0.000323503	5.39244e-05	0.00137908
UP_KEYWORDS	Cleavage on pair of basic residues	19	2.60274	8.96522e-06	ADAMTS15, TGFB3, NMB, CDH1, MMP16, CDH2, CDH4, TGFB1, CDH5, CALCA, SCT, ADAMTS8, CILP2, PRRG4, ITGA6, DSG2, GDF11, PDGFD, BMP6	717	96	12297	3.3944	0.00282901	0.000404635	0.0120745
GOTERM_BP_DIRECT	GO:0006954~inflammatory response	25	3.42466	1.50161e-06	CYSLTR1, PTGS2, CRLF2, PPARG, TLR2, IL17RE, AFAP1L2, KIT, PXK, NRADD, TGFB1, CALCA, S1PR3, HRH1, SMPDL3B, SEMA7A, THBS1, CSF1R, PIK3CG, CHST2, AIM2, CYBA, RPS6KA4, PARP4, BMP6	633	138	10723	3.06883	0.0043183	0.0043183	0.0026918
INTERPRO	IPR013783:Immunoglobulin-like fold	40	5.47945	4.09007e-06	IGDCC4, CADM4, PLXNA2, OSMR, CRLF2, LEPR, H2-D1, LRRC4B, KIT, HMCN2, FNDC4, IL12RB1, CILP2, SEMA3G, SEMA7A, TGM1, TGM2, MFAP3L, LRFN3, CSF1R, GHR, LRRC4, PTPRJ, IL2RB, HAPLN4, LRRN4, RIMBP2, MID1, MID2, SIGIRR, AMIGO1, TRIM36, IL20RB, KAZALD1, EBF2, PECAM1, PDGFRA, VCAN, FND3C2, KALRN	694	302	11604	2.21463	0.00476989	0.00476989	0.00659055
GOTERM_CC_DIRECT	GO:0009986~cell surface	44	6.0274	1.20395e-05	ACVRL1, WNT5B, RTN4RL1, ADAMTS15, H2-D1, TGFB3, TLR2, CDH1, ITGB3, KIT, GPRC5B, TGFB1, CD74, CDH5, SDC3, ACVR1B, SLC1A3, PROCR, SLCO3A1, THBS1, ENTPD1, LRFN3, CSF1R, GHR, PTPRJ, LPL, IL2RB, LGALS3, MRC2, TPBG, ANXA2, THBD, PROM2, ITGA6, TMEM8B, DSG2, PECAM1, PDGFRA, LIPG, TFPI, VCAN, KCNH2, TJP3, INTU	666	372	11424	2.02887	0.00530736	0.000886522	0.0170353
GOTERM_CC_DIRECT	GO:0030054~cell junction	53	7.26027	1.22749e-05	CLDN7, CLDN4, WASF1, RUSC1, LRRC4B, NCS1, GJA1, RHOU, HMCN2, ATAT1, CHRNA4, ZYX, LRRC4, PTPRJ, GABRG3, RIMBP2, ARHGAP28, LDLRAD3, PTPRN, TNS4, DDB2, DSP, DBN1, UNC13B, LCP1, PARVB, PARVA, SSH2, CDH1, AFAP1L1, ITGB3, NRN1, CDH5, AMPH, RASGRP2, LRFN3, NPHP1, PHACTR1, SYT11, FSCN1, AHI1, PCDH12, PPP1R13L, RGS14, SYNGR3, ANXA2, SLC17A5, SARM1, DSG2, PKP3, PECAM1, AMOT, TJP3	666	484	11424	1.87834	0.00541084	0.000774775	0.0173683
UP_KEYWORDS	Calcium	47	6.43836	1.9433e-05	NKD2, CLTB, ARSI, NCS1, CABP7, CDH1, COL2A1, CDH2, CDH4, DNASE1L3, CDH5, VILL, EFHD2, HMCN2, SMOC2, CGREF1, NPTX1, ATP2B4, GSN, RASGRP2, TGM1, TGM2, NOS3, FBN2, THBS1, ENTPD1, CIB2, CDH23, SYT11, MRC2, PCDH12, MMP16, DAGLB, ITPR2, ANXA2, ATP2C2, PLA2G4A, ITGA6, DSG2, ATP2A3, ANXA11, PON2, CACNA1H, VCAN, LRP2, CACNA1C, LCP1	717	416	12297	1.93769	0.00612209	0.000767318	0.0261709
UP_KEYWORDS	Lipid degradation	14	1.91781	3.86725e-05	LPL, PLD2, PLD4, PLBD1, ABHD4, DAGLB, PLBD2, PLA2G4A, SMPDL3B, LIPG, MGLL, LIPH, LIPE, PLCXD2	717	61	12297	3.93621	0.0121464	0.00135694	0.0520749
UP_KEYWORDS	Cell junction	47	6.43836	4.98191e-05	CLDN7, CLDN4, RUSC1, WASF1, SSH2, LRRC4B, NCS1, GJA1, CDH1, AFAP1L1, ITGB3, NRN1, RHOU, CDH5, AMPH, ATAT1, RASGRP2, CHRNA4, ZYX, LRFN3, NPHP1, LRRC4, PTPRJ, PHACTR1, GABRG3, SYT11, RIMBP2, FSCN1, AHI1, PCDH12, PTPRN, RGS14, SYNGR3, TNS4, SLC17A5, SARM1, DSG2, PKP3, PECAM1, DSP, AMOT, TJP3, DBN1, UNC13B, LCP1, PARVB, PARVA	717	432	12297	1.86592	0.0156199	0.00157308	0.0670798
KEGG_PATHWAY	mmu04514:Cell adhesion molecules (CAMs)	14	1.91781	8.31382e-05	LRRC4, CLDN7, CLDN4, ITGA6, PECAM1, LRRC4B, H2-D1, CDH1, VCAN, CNTNAP1, CDH2, CDH4, CDH5, SDC3	269	64	4454	3.62198	0.0189409	0.0189409	0.106534
GOTERM_CC_DIRECT	GO:0031012~extracellular matrix	27	3.69863	4.39638e-05	MATN2, LPL, AEBP1, LTBP1, LGALS3, LTBP4, ADAMTS15, TGFB3, COL2A1, MMP16, COL5A3, MYH9, TGFB1, MMRN2, LAMA1, SOST, ADAMTS8, LAMB2, SERPINE2, SBSN, SERPINE1, COL6A2, TGM2, DSP, VCAN, FBN2, THBS1	666	191	11424	2.42479	0.0192448	0.00242611	0.0621934
GOTERM_CC_DIRECT	GO:0009897~external side of plasma membrane	20	2.73973	4.75191e-05	IL2RB, RTN4RL1, LGALS3, OSMR, CRLF2, TLR2, H2-D1, ITGB3, KIT, CD74, CDH5, GPC4, IL12RB1, ITGA6, SEMA7A, PECAM1, PDGFRA, CHRNA4, AMOT, THBS1	666	118	11424	2.90731	0.0207849	0.00233105	0.0672213
UP_KEYWORDS	Receptor	51	6.9863	7.53191e-05	ACVRL1, OSMR, GPR161, LEPR, PPARG, TLR2, PTPN21, IL17RE, RORA, ADORA1, IL17RA, ACVR1B, S1PR3, CHRNA4, ERRFI1, GHR, KDELR3, IRS3, LDLRAD3, NR0B1, PTPRN, SIGIRR, THBD, IL20RB, LRP11, PDGFRA, CYSLTR1, RTN4RL1, CRLF2, ITGB3, KIT, GPR68, GPRC5B, GPRC5A, SORCS2, PAQR5, VDR, IRAK3, HRH1, IL12RB1, PROCR, CSF1R, IL2RB, GPR157, LTK, MRC2, BZRAP1, NPR2, ITPR2, ITGA6, LRP2	717	491	12297	1.78143	0.0235207	0.00216145	0.101399
Cell adhesion molecules	Cell adhesion	29	3.9726	8.4575e-05	CADM4, CDH1, CDH2, ITGB3, CDH4, CDH5, CGREF1, LAMB2, COL6A2, CNTNAP1, ZYX, THBS1, LRFN3, CDH23, PODXL, PCDH12, EFS, TMEM8, MYH9, AMIGO1, LAMA1, DSG2, TMEM8B, ITGA6, PKP3, PECAM1, LAMC2, PARVB, PARVA	717	221	12297	2.25053	0.0263728	0.00222476	0.113853
UP_KEYWORDS	Developmental protein	62	8.49315	8.67223e-05	CDX1, GPR161, MITF, PAX6, HOXD13, HOXC6, KDM1B, METRN, SPRY1, DAB1, LBH, WNT3, HEY1, SERPINE2, PAX9, SEMA7A, DND1, PDGFD, SPATA24, TWIST1, SOX11, OTX1, VAX2, AMIGO1, SEMA4F, GADD45G, PDGFRA, RIPPLY3, GADD45B, DBN1, INTU, TNFAIP2, IRX4, RNF17, TSHZ1, WNT5B, TDRD7, HOXB13, MDK, PAQR5, MSX3, T, HOXA3, TCF4, NKX2-5, DCLK1, TLX1, SIM2, TBX2, DPYSL2, RGS14, ISL2, SEMA6B, TRIM54, 4930447C04RIK, EBF2, KA…	717	640	12297	1.66147	0.0270333	0.00210589	0.116742
UP_KEYWORDS	Homeobox	20	2.73973	0.000133065	IRX4, POU6F1, CDX1, RHOX6, TSHZ1, OTX1, PAX6, HOXD13, HOXB13, VAX2, HDX, HOXC6, MSX3, MEIS3, ISL2, HOXA3, HOPX, RHOX12, NKX2-5, TLX1	717	127	12297	2.70089	0.0411794	0.00299916	0.179075
GOTERM_MF_DIRECT	GO:0003779~actin binding	34	4.65753	5.92914e-05	SHROOM1, MTSS1, WASF1, RUSC1, SSH2, PXK, DAAM2, VILL, CORO2B, GSN, MICAL1, NOS3, FMNL1, INF2, PHACTR1, FMNL2, MYO6, MYO1B, MICAL2, FSCN1, SYNPO2, SPIRE2, MYH9, WAS, TNS4, LIMCH1, MIB2, AKAP5, MYH14, DBN1, LCP1, PARVB, MYH7B, PARVA	622	266	10304	2.11745	0.0477397	0.0477397	0.0913414
KEGG_PATHWAY	mmu04060:Cytokine-cytokine receptor interaction	15	2.05479	0.000274875	IL2RB, OSMR, CRLF2, LEPR, TGFB3, IL17RA, TGFB1, ACVR1B, IL12RB1, IL20RB, CLCF1, CXCL16, CSF1R, GHR, THPO	269	81	4454	3.06623	0.0612724	0.0311204	0.351829
KEGG_PATHWAY	mmu05146:Amoebiasis	14	1.91781	0.000290539	PIK3CG, TLR2, TGFB3, SERPINB1A, COL2A1, COL5A3, TGFB1, SERPINB9B, LAMA1, LAMB2, LAMC2, SERPINB9G, SERPINB9F, SERPINB9D	269	72	4454	3.21954	0.0646493	0.0220316	0.371845
UP_SEQ_FEATURE	domain:Fibronectin type-III	10	1.36986	4.14898e-05	FNDC4, IL2RB, TRIM36, LRRN4, CRLF2, MID1, LRFN3, MID2, GHR, KALRN	641	31	11138	5.60515	0.0713078	0.0122539	0.0703542
UP_KEYWORDS	Actin-binding	26	3.56164	0.000246688	SHROOM1, MTSS1, WASF1, SSH2, PXK, VILL, CORO2B, GSN, MICAL1, INF2, PHACTR1, MYO6, MYO1B, MICAL2, FSCN1, SYNPO2, SPIRE2, MYH9, TNS4, MIB2, MYH14, DBN1, LCP1, PARVB, MYH7B, PARVA	717	200	12297	2.22958	0.0750013	0.00518405	0.33175
SMART	SM00093:SERPIN	7	0.958904	0.000296773	SERPINB9B, SERPINE2, SERPINE1, SERPINB1A, SERPINB9G, SERPINB9F, SERPINB9D	435	15	6322	6.78222	0.0808409	0.0808409	0.392548
SMART	SM00389:HOX	20	2.73973	0.000304415	IRX4, POU6F1, CDX1, RHOX6, TSHZ1, OTX1, PAX6, HOXD13, HOXB13, VAX2, HDX, HOXC6, MSX3, MEIS3, ISL2, HOXA3, HOPX, RHOX12, NKX2-5, TLX1	435	116	6322	2.50575	0.0828342	0.0423123	0.402638
GOTERM_CC_DIRECT	GO:0042383~sarcolemma	15	2.05479	0.000215572	PLD2, ADCY5, ATP1A3, ANXA2, SLC2A5, ATP2B4, DES, KRT8, COL6A2, CACNA1H, NOS3, CACNA1C, CIB2, ABCC8, ALOX12	666	81	11424	3.17651	0.0908935	0.00948405	0.304615
UP_KEYWORDS	Membrane	291	39.863	0.000305245	CADM4, SGMS2, PTGS2, EFNA1, OSMR, RUSC1, ADCY5, ADORA1, AQP3, S1PR3, ERO1LB, ATP2B4, DIRAS2, SEMA7A, KCNK6, CHRNA4, GGTA1, GNG7, RAB27A, CDH23, LRRC4, PIK3CG, PTPRJ, PLD2, PLD4, SPIRE2, PTPRN, PARP16, RND3, ATP2C2, UNC13D, TACSTD2, ARXES2, PDGFRA, TMEM170B, FND3C2, EIF2AK3, UNC13B, MYH7B, TMEM121, PXK, NRN1, CD74, SORCS2, SERINC2, PROCR, TCF4, FCHO1, TMEM120A, LAPTM4B, GPR157, FBXO2, PCDH12, SYNG…	717	4238	12297	1.17764	0.0919649	0.00601137	0.410349
INTERPRO	IPR001356:Homeodomain	20	2.73973	8.49333e-05	IRX4, POU6F1, CDX1, RHOX6, TSHZ1, OTX1, PAX6, HOXD13, HOXB13, VAX2, HDX, HOXC6, MSX3, MEIS3, ISL2, HOXA3, HOPX, RHOX12, NKX2-5, TLX1	694	120	11604	2.78674	0.094521	0.0484334	0.136774
GOTERM_MF_DIRECT	GO:0005267~potassium channel activity	10	1.36986	0.000132925	TMEM175, KCNN4, HCN2, KCNQ5, KCNS1, KCNK6, KCNJ10, KCNK13, KCNH2, ABCC8	622	34	10304	4.87233	0.10387	0.0533588	0.204669
INTERPRO	IPR000215:Serpin family	7	0.958904	0.000139482	SERPINB9B, SERPINE2, SERPINE1, SERPINB1A, SERPINB9G, SERPINB9F, SERPINB9D	694	15	11604	7.80288	0.150465	0.0529045	0.224525
INTERPRO	IPR023795:Protease inhibitor I4, serpin, conserved site	7	0.958904	0.000139482	SERPINB9B, SERPINE2, SERPINE1, SERPINB1A, SERPINB9G, SERPINB9F, SERPINB9D	694	15	11604	7.80288	0.150465	0.0529045	0.224525
INTERPRO	IPR023796:Serpin domain	7	0.958904	0.000139482	SERPINB9B, SERPINE2, SERPINE1, SERPINB1A, SERPINB9G, SERPINB9F, SERPINB9D	694	15	11604	7.80288	0.150465	0.0529045	0.224525
UP_KEYWORDS	Transmembrane helix	205	28.0822	0.000563013	CADM4, SGMS2, OSMR, ADCY5, ADORA1, AQP3, S1PR3, ATP2B4, KCNK6, CHRNA4, GGTA1, CDH23, PTPRJ, LRRC4, PLD4, PTPRN, PARP16, RND3, ATP2C2, TACSTD2, ARXES2, PDGFRA, TMEM170B, FND3C2, EIF2AK3, TMEM121, NRN1, CD74, SORCS2, SERINC2, PROCR, TCF4, TMEM120A, LAPTM4B, GPR157, PCDH12, DAGLB, SYNGR3, SEMA6B, ATP2A3, PON2, TMEM119, SLC27A1, ACVRL1, GPR161, H2-D1, GJA1, KCNJ10, CDCP1, KCNK13, XYLT1, ZFYVE9, GHR, …	717	2869	12297	1.22547	0.163026	0.0104138	0.755658
GOTERM_BP_DIRECT	GO:0016042~lipid catabolic process	14	1.91781	6.21885e-05	PLD2, LPL, PLD4, PLBD1, ABHD4, ADORA1, DAGLB, PLBD2, PLA2G4A, SMPDL3B, LIPG, MGLL, LIPH, LIPE	633	63	10723	3.76444	0.164089	0.0857181	0.111422
UP_KEYWORDS	Transmembrane	205	28.0822	0.000656253	CADM4, SGMS2, OSMR, ADCY5, ADORA1, AQP3, S1PR3, ATP2B4, KCNK6, CHRNA4, GGTA1, CDH23, PTPRJ, LRRC4, PLD4, PTPRN, PARP16, RND3, ATP2C2, TACSTD2, ARXES2, PDGFRA, TMEM170B, FND3C2, EIF2AK3, TMEM121, NRN1, CD74, SORCS2, SERINC2, PROCR, TCF4, TMEM120A, LAPTM4B, GPR157, PCDH12, DAGLB, SYNGR3, SEMA6B, ATP2A3, PON2, TMEM119, SLC27A1, ACVRL1, GPR161, H2-D1, GJA1, KCNJ10, CDCP1, KCNK13, XYLT1, ZFYVE9, GHR, …	717	2878	12297	1.22164	0.187341	0.0114585	0.880291
GOTERM_BP_DIRECT	GO:0030335~positive regulation of cell migration	24	3.28767	8.18238e-05	PLD2, WNT5B, PODXL, SSH2, ZFP703, SUN2, ITGB3, KIT, TGFB1, SEMA6B, ITGA6, SEMA4F, SEMA3G, CXCL16, SEMA7A, PDGFRA, LAMC2, PDGFD, THBS1, FAM83H, GPNMB, CTSH, CSF1R, ALOX12	633	163	10723	2.49423	0.210082	0.0755983	0.146578
UP_SEQ_FEATURE	transmembrane region	177	24.2466	0.00015684	CADM4, SGMS2, OSMR, PLXNA2, ADCY5, TLR2, LRRC4B, IL17RE, ADORA1, C2CD2L, IL17RA, AQP3, S1PR3, SLC2A5, B3GALNT1, CHRNA4, DNAJC4, GGTA1, CDH23, LRRC4, PTPRJ, ATG9B, PLD4, PTPRN, PARP16, ATP2C2, THBD, TACSTD2, LRP11, ARXES2, PDGFRA, TMEM170B, EIF2AK3, SLC40A1, MYH7B, SLC38A9, CYSLTR1, TMEM121, ITGB3, EXTL1, SORCS2, CD74, PAQR5, SERINC2, KCNS1, IL12RB1, PROCR, SLC30A4, TMEM30B, B3GNT3, MFAP3L, ENTPD1…	641	2404	11138	1.27935	0.243965	0.0391648	0.265708
GOTERM_CC_DIRECT	GO:0016021~integral component of membrane	206	28.2192	0.000643569	CADM4, SGMS2, OSMR, ADCY5, ADORA1, AQP3, S1PR3, ATP2B4, KCNK6, CHRNA4, GGTA1, CDH23, PTPRJ, LRRC4, PLD4, PTPRN, PARP16, RND3, ATP2C2, TACSTD2, ARXES2, PDGFRA, TMEM170B, FND3C2, EIF2AK3, TMEM121, NRN1, CD74, SORCS2, SERINC2, PROCR, TCF4, TMEM120A, LAPTM4B, GPR157, PCDH12, DAGLB, SYNGR3, SEMA6B, ATP2A3, PON2, TMEM119, SLC27A1, ACVRL1, GPR161, H2-D1, GJA1, KCNJ10, CDCP1, KCNK13, XYLT1, ZFYVE9, GHR, …	666	2900	11424	1.21847	0.247646	0.0255364	0.906845
GOTERM_BP_DIRECT	GO:0001501~skeletal system development	15	2.05479	0.000104115	HAPLN4, LGALS3, SOX11, FST, HOXD13, COL2A1, TGFB1, VDR, AES, GDF11, VCAN, FOXC1, RUNX1, EIF2AK3, CHRD	633	75	10723	3.38799	0.259237	0.0722739	0.186475
INTERPRO	IPR003961:Fibronectin, type III	19	2.60274	0.000260468	PTPRJ, IGDCC4, IL2RB, LRRN4, OSMR, LEPR, CRLF2, RIMBP2, BZRAP1, MID1, MID2, FNDC4, TRIM36, IL12RB1, IL20RB, FND3C2, LRFN3, GHR, KALRN	694	120	11604	2.64741	0.262528	0.0733059	0.418894
SMART	SM00211:TY	6	0.821918	0.0012083	SMOC2, TACSTD2, IGFBP2, IGFBP3, CD74, IGFBP5	435	13	6322	6.70769	0.290621	0.108148	1.58936
GOTERM_BP_DIRECT	GO:0007155~cell adhesion	33	4.52055	0.000148684	CADM4, CDH1, CDH2, ITGB3, CDH4, CDH5, SDC3, CGREF1, LAMB2, COL6A2, CNTNAP1, ZYX, THBS1, GPNMB, LRFN3, CDH23, HAPLN4, PODXL, TMEM8, EFS, PCDH12, MYH9, AMIGO1, LAMA1, TMEM8B, ITGA6, DSG2, PKP3, PECAM1, LAMC2, VCAN, PARVB, PARVA	633	273	10723	2.04769	0.34854	0.0821377	0.2662
INTERPRO	IPR017878:TB domain	5	0.684932	0.000381707	LTBP1, LTBP4, FST, FSTL3, FBN2	694	7	11604	11.9432	0.360009	0.0853925	0.613313
UP_KEYWORDS	Immunoglobulin domain	22	3.0137	0.00147534	LRRC4, IGDCC4, HAPLN4, CADM4, LEPR, LRRC4B, KIT, SIGIRR, AMIGO1, HMCN2, CILP2, SEMA4F, SEMA3G, KAZALD1, SEMA7A, PECAM1, PDGFRA, VCAN, MFAP3L, LRFN3, CSF1R, KALRN	717	177	12297	2.13172	0.372839	0.0242564	1.96894
GOTERM_CC_DIRECT	GO:0016323~basolateral plasma membrane	18	2.46575	0.00108037	CLDN7, NKD2, LEPR, CDH1, KCNJ10, CDH2, ADORA1, AQP3, ANXA2, KCNN4, ATP2B4, SLC1A3, PROM2, ITGA6, AKAP5, DSP, ENTPD1, SLC40A1	666	127	11424	2.43116	0.379842	0.0390329	1.51798
GOTERM_MF_DIRECT	GO:0004867~serine-type endopeptidase inhibitor activity	9	1.23288	0.000601449	SERPINB9B, SERPINE2, SERPINE1, TFPI, SERPINB1A, SERPINB9G, SERPINB9F, WFDC2, SERPINB9D	622	33	10304	4.51798	0.391248	0.152486	0.922952
GOTERM_BP_DIRECT	GO:0007275~multicellular organism development	64	8.76712	0.000179992	CDX1, GPR161, MITF, PAX6, HOXD13, HOXC6, KDM1B, METRN, SPRY1, DAB1, LBH, WNT3, PAX9, HEY1, SERPINE2, SEMA7A, SPRED1, DND1, PDGFD, SPATA24, TWIST1, SOX11, OTX1, VAX2, AMIGO1, SEMA4F, GADD45G, PDGFRA, RIPPLY3, GADD45B, DBN1, INTU, TNFAIP2, IRX4, RNF17, TSHZ1, WNT5B, TDRD7, HOXB13, MDK, PAQR5, MSX3, VDR, T, HOXA3, KRT8, TCF4, NKX2-5, DCLK1, SIM2, TBX2, DPYSL2, RGS14, ISL2, SEMA6B, TRIM54, 4930447C04…	633	678	10723	1.59905	0.404756	0.0828315	0.322168
INTERPRO	IPR009057:Homeodomain-like	24	3.28767	0.000481725	IRX4, POU6F1, CDX1, RHOX6, TSHZ1, OTX1, SSH2, PAX6, HOXD13, HOXB13, VAX2, MYPOP, HDX, KDM1B, HOXC6, MSX3, MEIS3, ISL2, HOXA3, PAX9, HOPX, RHOX12, NKX2-5, TLX1	694	181	11604	2.21708	0.430657	0.0896068	0.773433
GOTERM_MF_DIRECT	GO:0008201~heparin binding	14	1.91781	0.000713972	LPL, ADAMTS15, COL5A3, MDK, SMOC2, ADAMTS8, SOST, SERPINE2, LIPG, LIPH, LAMC2, GPNMB, THBS1, CHRD	622	78	10304	2.97337	0.44525	0.136973	1.09474
UP_KEYWORDS	Ion channel	18	2.46575	0.00197295	LRRC8E, HCN2, TMC6, GABRG3, TMC8, KCNJ10, KCNK13, ITPR2, TMEM175, KCNN4, KCNQ5, KCNS1, KCNK6, CHRNA4, CACNA1H, KCNH2, CACNA1C, KCTD14	717	134	12297	2.30382	0.464239	0.0307215	2.62489
INTERPRO	IPR000716:Thyroglobulin type-1	6	0.821918	0.000644299	SMOC2, TACSTD2, IGFBP2, IGFBP3, CD74, IGFBP5	694	13	11604	7.71714	0.52925	0.102043	1.03319
UP_SEQ_FEATURE	domain:Cadherin 3	7	0.958904	0.000500404	DSG2, PCDH12, CDH1, CDH2, CDH4, CDH5, CDH23	641	19	11138	6.40168	0.590347	0.105558	0.845434
UP_SEQ_FEATURE	domain:Cadherin 4	7	0.958904	0.000500404	DSG2, PCDH12, CDH1, CDH2, CDH4, CDH5, CDH23	641	19	11138	6.40168	0.590347	0.105558	0.845434
GOTERM_MF_DIRECT	GO:0097110~scaffold protein binding	9	1.23288	0.00111695	KRT18, ATP2B4, ADCY5, KRT8, CACNA1H, DSP, GJA1, NOS3, KCNH2	622	36	10304	4.14148	0.602277	0.168397	1.70767
GOTERM_CC_DIRECT	GO:0071944~cell periphery	10	1.36986	0.00212077	KRT18, SLC1A3, NKD2, MYO1B, PDE4B, PECAM1, KRT8, CDH1, CDH5, MBP	666	50	11424	3.43063	0.608737	0.0696391	2.95953
PIR_SUPERFAMILY	PIRSF000865:lipoprotein lipase, LIPH type	3	0.410959	0.0153289	LPL, LIPG, LIPH	65	4	1214	14.0077	0.616246	0.616246	14.4347
GOTERM_CC_DIRECT	GO:0045202~synapse	32	4.38356	0.00248173	WASF1, RUSC1, LRRC4B, NCS1, CDH2, NRN1, ADORA1, AMPH, LAMB2, SLC1A3, RASGRP2, CHRNA4, MGLL, PRSS12, LRFN3, CDH23, LRRC4, HCN2, PHACTR1, GABRG3, MYO6, SYT11, RIMBP2, ATP1A3, PTPRN, RGS14, SYNGR3, SLC17A5, SARM1, SEMA4F, SYT13, UNC13B	666	312	11424	1.7593	0.666558	0.0754509	3.45506
UP_KEYWORDS	Growth factor binding	5	0.684932	0.00387235	LTBP1, LTBP4, IGFBP2, IGFBP3, IGFBP5	717	12	12297	7.14609	0.706547	0.0567112	5.09154
GOTERM_MF_DIRECT	GO:0005102~receptor binding	28	3.83562	0.00171689	HACL1, MTSS1, NXPH4, CADM4, WNT5B, REN1, EHHADH, LRRC4B, H2-D1, GJA1, KCNJ10, CDH5, IL17RA, ACOX3, CALCA, SCT, WNT3, SERPINE2, CLCF1, SERPINE1, HMGCL, THPO, LPL, TMC8, RAB8B, LDLRAP1, LAMA1, MLYCD	622	245	10304	1.89325	0.757717	0.210436	2.61359
UP_SEQ_FEATURE	short sequence motif:Cell attachment site	10	1.36986	0.000886044	LAMA1, SEMA7A, TGFB3, COL6A2, LAMC2, IGFBP2, LRP2, GPNMB, THBS1, TGFB1	641	45	11138	3.86133	0.794131	0.161057	1.49238
GOTERM_MF_DIRECT	GO:0005201~extracellular matrix structural constituent	7	0.958904	0.0019511	LAMA1, HAPLN4, MATN1, COL2A1, VCAN, FBN2, COL5A3	622	23	10304	5.0418	0.800357	0.205606	2.96513
UP_SEQ_FEATURE	domain:Cadherin 1	7	0.958904	0.000906811	DSG2, PCDH12, CDH1, CDH2, CDH4, CDH5, CDH23	641	21	11138	5.79199	0.801621	0.149353	1.5271
UP_SEQ_FEATURE	domain:Cadherin 2	7	0.958904	0.000906811	DSG2, PCDH12, CDH1, CDH2, CDH4, CDH5, CDH23	641	21	11138	5.79199	0.801621	0.149353	1.5271
UP_KEYWORDS	LIM domain	10	1.36986	0.0053204	CRIP1, ISL2, LIMK2, LIMCH1, MICAL2, PDLIM4, PDLIM2, LMO7, MICAL1, ZYX	717	57	12297	3.00888	0.814692	0.0737622	6.93305
GOTERM_BP_DIRECT	GO:0007165~signal transduction	52	7.12329	0.000618271	ACVRL1, PLXNA2, GPR161, LEPR, PPARG, TLR2, RGL3, GJA1, RASSF8, NRADD, ADORA1, SHE, S1PR3, ACVR1B, DIRAS2, WNT3, CHRNA4, NOS3, ARHGAP8, ARHGAP9, GNG7, ARHGAP28, PDE4D, SIGIRR, PLEKHH3, AKAP5, WNT5B, CYSLTR1, RHPN1, RTKN, GPR68, GPRC5B, GPRC5A, CD74, SMOC2, IRAK3, HRH1, BCL11B, NDRG1, RASA4, GPR157, LTK, RGS14, TRADD, STAT2, PEX11A, SARM1, TOM1L2, IGFBP2, ARAP2, SMPD3, BCAR3	633	544	10723	1.61926	0.831767	0.224797	1.10255
GOTERM_CC_DIRECT	GO:0016020~membrane	305	41.7808	0.00410301	CADM4, SGMS2, PTGS2, EFNA1, OSMR, RUSC1, ADCY5, ADORA1, AQP3, S1PR3, ERO1LB, ATP2B4, DIRAS2, SERPINE2, SEMA7A, CHRNA4, CEP290, GGTA1, GNG7, RAB27A, CDH23, LRRC4, PIK3CG, PTPRJ, PLD2, KIF5A, PLD4, SPIRE2, PTPRN, MYH9, PARP16, RND3, ATP2C2, UNC13D, TACSTD2, PARP14, PDGFRA, TMEM170B, LAMC2, DBN1, EIF2AK3, UNC13B, MYH7B, TMEM121, PXK, NRN1, CD74, SORCS2, SERINC2, PROCR, FCHO1, LAPTM4B, TMEM120A, GPR1…	666	4653	11424	1.12437	0.83753	0.1141	5.65195
SMART	SM00112:CA	7	0.958904	0.00715328	DSG2, PCDH12, CDH1, CDH2, CDH4, CDH5, CDH23	435	26	6322	3.91282	0.869819	0.399329	9.0746
SMART	SM00408:IGc2	16	2.19178	0.00717269	LRRC4, IGDCC4, HAPLN4, CADM4, LRRC4B, KIT, AMIGO1, HMCN2, CILP2, KAZALD1, PECAM1, PDGFRA, MFAP3L, LRFN3, CSF1R, KALRN	435	109	6322	2.13333	0.87054	0.335604	9.09816
GOTERM_MF_DIRECT	GO:0019838~growth factor binding	8	1.09589	0.00250144	ACVR1B, LTBP1, NKD2, OSMR, LTBP4, IGFBP2, IGFBP3, IGFBP5	622	32	10304	4.14148	0.873343	0.227625	3.78652
UP_KEYWORDS	Lipoprotein	42	5.75342	0.00688095	APOBEC3, RAB3B, NKD2, WNT5B, RTN4RL1, SGMS2, RAB3D, EFNA1, PHKA1, UCHL1, NCS1, NRN1, RHOU, ADORA1, GPC4, DIRAS2, WNT3, SMPDL3B, SEMA7A, CHRNA4, PALM3, NOS3, DNAJA4, GNG7, RAB27A, FMNL1, LPL, FMNL2, GABRG3, RAB8B, ALDH3B2, LDLRAD3, ARL6, STOM, RAB32, RND3, ITGA6, PECAM1, AKAP5, DSP, ARL4C, SMPD3	717	474	12297	1.51968	0.887173	0.0905043	8.88055
GOTERM_CC_DIRECT	GO:0005911~cell-cell junction	19	2.60274	0.0051089	PTPRJ, ARHGEF6, FSCN1, PCDH12, PRKCH, AHI1, GJA1, CDH1, CDH2, KIT, WAS, CDH5, AQP3, ANXA2, LAMA1, KRT8, DSP, DBN1, NPHP1	666	159	11424	2.04975	0.896058	0.131941	6.99151
INTERPRO	IPR003598:Immunoglobulin subtype 2	16	2.19178	0.00202089	LRRC4, IGDCC4, HAPLN4, CADM4, LRRC4B, KIT, AMIGO1, HMCN2, CILP2, KAZALD1, PECAM1, PDGFRA, MFAP3L, LRFN3, CSF1R, KALRN	694	109	11604	2.45438	0.906032	0.255915	3.2072
SMART	SM00060:FN3	14	1.91781	0.0087632	PTPRJ, IGDCC4, LRRN4, OSMR, CRLF2, LEPR, RIMBP2, BZRAP1, MID1, MID2, FNDC4, IL12RB1, FND3C2, KALRN	435	91	6322	2.2359	0.917892	0.340728	11.0091
GOTERM_MF_DIRECT	GO:0031994~insulin-like growth factor I binding	5	0.684932	0.00306589	ITGA6, ITGB3, IGFBP2, IGFBP3, IGFBP5	622	11	10304	7.52996	0.920599	0.245327	4.6222
GOTERM_BP_DIRECT	GO:0035902~response to immobilization stress	6	0.821918	0.000896967	FOS, REN1, LRP11, PPARG, NR0B1, TGFB1	633	14	10723	7.25999	0.924696	0.276227	1.59578
INTERPRO	IPR020894:Cadherin conserved site	7	0.958904	0.00236323	DSG2, PCDH12, CDH1, CDH2, CDH4, CDH5, CDH23	694	24	11604	4.8768	0.937079	0.264585	3.74085
UP_SEQ_FEATURE	short sequence motif:Box 1 motif	6	0.821918	0.00158399	IL2RB, IL12RB1, OSMR, LEPR, CRLF2, GHR	641	16	11138	6.51599	0.94078	0.226597	2.65316
UP_SEQ_FEATURE	domain:LIM zinc-binding	6	0.821918	0.00158399	CRIP1, LIMCH1, MICAL2, PDLIM4, PDLIM2, MICAL1	641	16	11138	6.51599	0.94078	0.226597	2.65316
GOTERM_MF_DIRECT	GO:0005509~calcium ion binding	35	4.79452	0.00343799	NKD2, LTBP1, LTBP4, NCS1, CABP7, CDH1, CDH2, CDH4, CDH5, HMCN2, EFHD2, SMOC2, CGREF1, PRRG4, MYL6B, GSN, RASGRP2, TGM2, FBN2, THBS1, CIB2, CDH23, MATN2, MATN1, PCDH12, MMP16, ITPR2, ANXA2, PLA2G4A, THBD, DSG2, ANXA11, VCAN, LRP2, LCP1	622	347	10304	1.67091	0.941646	0.247326	5.16938
KEGG_PATHWAY	mmu03320:PPAR signaling pathway	8	1.09589	0.0131443	LPL, SLC27A1, EHHADH, PPARG, ACADL, PCK2, PLTP, ACOX3	269	43	4454	3.08049	0.95232	0.532712	15.6025
UP_SEQ_FEATURE	domain:Thyroglobulin type-1	5	0.684932	0.00171628	TACSTD2, IGFBP2, IGFBP3, CD74, IGFBP5	641	10	11138	8.68799	0.953242	0.225262	2.87172
PIR_SUPERFAMILY	PIRSF000615:tyrosine-protein kinase, CSF-1/PDGF receptor type	3	0.410959	0.0484065	PDGFRA, KIT, CSF1R	65	7	1214	8.0044	0.953869	0.785219	39.3902
GOTERM_CC_DIRECT	GO:0005604~basement membrane	11	1.50685	0.00698238	MATN2, HMCN2, LAMA1, SMOC2, LAMB2, ITGA6, COL2A1, LAMC2, RUNX1, MMRN2, ANXA2	666	70	11424	2.6955	0.954817	0.166548	9.43944
GOTERM_CC_DIRECT	GO:0016324~apical plasma membrane	22	3.0137	0.00704582	TNIK, CLDN4, OSMR, PODXL, LMO7, GJA1, PDE4D, KCNJ10, CDH2, ITGB3, KCNN4, CYBA, SLC2A5, PROM2, DSG2, ATP8B1, SLCO3A1, IGFBP2, SLC39A4, LRP2, TJP3, RAB27A	666	202	11424	1.86817	0.956075	0.159389	9.52128
KEGG_PATHWAY	mmu05412:Arrhythmogenic right ventricular cardiomyopathy (ARVC)	8	1.09589	0.0148524	DES, ITGA6, DSG2, DSP, GJA1, CDH2, ITGB3, CACNA1C	269	44	4454	3.01048	0.967989	0.497589	17.4563
UP_KEYWORDS	Heparin-binding	8	1.09589	0.011344	LPL, SOST, ADAMTS8, SERPINE2, LIPG, LAMC2, THBS1, MDK	717	43	12297	3.19081	0.972817	0.139478	14.2439
KEGG_PATHWAY	mmu04512:ECM-receptor interaction	9	1.23288	0.0159667	LAMA1, LAMB2, ITGA6, COL6A2, COL2A1, LAMC2, ITGB3, THBS1, COL5A3	269	55	4454	2.70943	0.975325	0.460438	18.6453
UP_SEQ_FEATURE	domain:Cadherin 5	6	0.821918	0.002139	PCDH12, CDH1, CDH2, CDH4, CDH5, CDH23	641	17	11138	6.1327	0.978027	0.25449	3.56702
INTERPRO	IPR007110:Immunoglobulin-like domain	22	3.0137	0.003422	LRRC4, IGDCC4, HAPLN4, CADM4, LEPR, LRRC4B, H2-D1, KIT, SIGIRR, AMIGO1, HMCN2, CILP2, SEMA3G, KAZALD1, SEMA7A, PECAM1, PDGFRA, VCAN, MFAP3L, LRFN3, CSF1R, KALRN	694	185	11604	1.98838	0.981815	0.330161	5.3739
UP_KEYWORDS	Potassium transport	8	1.09589	0.0128319	TMEM175, HCN2, KCNQ5, KCNS1, ATP1A3, KCNJ10, KCNK13, KCNH2	717	44	12297	3.1183	0.983111	0.150617	15.966
SMART	SM00132:LIM	10	1.36986	0.0146827	CRIP1, ISL2, LIMK2, LIMCH1, MICAL2, PDLIM4, PDLIM2, LMO7, MICAL1, ZYX	435	57	6322	2.54971	0.985016	0.45125	17.7993
KEGG_PATHWAY	mmu04350:TGF-beta signaling pathway	10	1.36986	0.0195302	ACVR1B, LTBP1, ZFYVE9, FST, TGFB3, THBS1, BAMBI, CHRD, TGFB1, BMP6	269	68	4454	2.43494	0.989288	0.476938	22.3425
UP_KEYWORDS	Differentiation	36	4.93151	0.0146353	IRX4, RNF17, TDRD7, PAX6, MDK, PAQR5, METRN, DAB1, SERPINE2, SEMA7A, TDRKH, TCF4, DCLK1, CREBL2, NPHP1, SIM2, SPATA24, TWIST1, LGALS3, SOX11, AHI1, PRKCH, DPYSL2, AMIGO1, SEMA6B, TRIM54, SARM1, IRF6, SEMA4F, KAZALD1, GADD45G, TMEM119, GADD45B, DBN1, TNFAIP2, BMP6	717	410	12297	1.50591	0.990523	0.164052	18.0103
UP_SEQ_FEATURE	sequence variant	24	3.28767	0.00261785	APOBEC3, MYO6, REN1, LEPR, PODXL, MITF, PAX6, H2-D1, BBX, COL2A1, KIT, RORA, ZFP28, LPIN1, HRH1, CTSJ, SEMA4F, BCL11B, PARP14, B3GALNT1, CHRNA4, KCNH2, NFIB, CDH23	641	213	11138	1.95786	0.990663	0.283831	4.34897
KEGG_PATHWAY	mmu04630:Jak-STAT signaling pathway	11	1.50685	0.0206114	PIK3CG, IL2RB, IL12RB1, IL20RB, OSMR, LEPR, CRLF2, CISH, STAT2, GHR, THPO	269	80	4454	2.27667	0.991689	0.450513	23.4333
GOTERM_BP_DIRECT	GO:0001503~ossification	12	1.64384	0.00171139	SOST, KAZALD1, FSTL3, COL2A1, FOXC1, NPR2, MMP16, RUNX1, TMEM119, EIF2AK3, BMP6, TWIST1	633	67	10723	3.03402	0.99282	0.422182	3.02385
GOTERM_BP_DIRECT	GO:0032570~response to progesterone	7	0.958904	0.00174136	FOS, NCOA1, CLDN4, DSG2, TGFB3, TLR2, TGFB1	633	23	10723	5.15564	0.993415	0.394862	3.07603
GOTERM_BP_DIRECT	GO:0050873~brown fat cell differentiation	7	0.958904	0.00174136	PEX11A, ALDH6A1, PTGS2, RGS2, ITGA6, EBF2, PPARG	633	23	10723	5.15564	0.993415	0.394862	3.07603
GOTERM_CC_DIRECT	GO:0070062~extracellular exosome	135	18.4932	0.0116813	CADM4, EFNA1, LTBP4, PGAM2, PDLIM2, GSTM5, MMRN2, SLC2A5, SBSN, SERPINE1, PDGFD, DDAH2, RAB27A, GNG7, PTPRJ, ALDH6A1, MYO6, TNIK, QDPR, MYH9, RND3, TRIM36, KRT18, TACSTD2, DSP, WFDC2, KALRN, WNT5B, STK10, ITGB3, NAGK, DAAM2, CD74, SIAE, SERINC2, LAMB2, PROCR, NAGA, DOPEY2, NDRG1, ENTPD1, ANGPTL2, TUBB4A, LPL, RAB8B, LGALS3, MYO1B, PODXL, FSCN1, FBXO2, LGALS8, PCDH12, ENDOD1, DSG2, TXNDC16, HEBP1,…	666	1924	11424	1.20357	0.994448	0.239169	15.3183
INTERPRO	IPR002126:Cadherin	7	0.958904	0.00446076	DSG2, PCDH12, CDH1, CDH2, CDH4, CDH5, CDH23	694	27	11604	4.33493	0.994627	0.378188	6.95079
GOTERM_BP_DIRECT	GO:0060907~positive regulation of macrophage cytokine production	4	0.547945	0.00186307	SEMA7A, TLR2, GPRC5B, CD74	633	5	10723	13.552	0.995366	0.386503	3.28765
GOTERM_CC_DIRECT	GO:0045095~keratin filament	4	0.547945	0.0126624	KRT18, KRT7, KRT8, FAM83H	666	9	11424	7.62362	0.99642	0.245444	16.5001
KEGG_PATHWAY	mmu05144:Malaria	5	0.684932	0.0242392	PECAM1, TGFB3, TLR2, THBS1, TGFB1	269	19	4454	4.35727	0.99646	0.465849	26.9908
SMART	SM01140:SM01140	4	0.547945	0.0197603	INF2, FMNL1, FMNL2, DAAM2	435	9	6322	6.45926	0.996546	0.507624	23.2388
SMART	SM01139:SM01139	4	0.547945	0.0197603	INF2, FMNL1, FMNL2, DAAM2	435	9	6322	6.45926	0.996546	0.507624	23.2388
UP_KEYWORDS	Polymorphism	15	2.05479	0.0178861	APOBEC3, LTK, REN1, PODXL, LEPR, BBX, ZFP28, HRH1, CTSJ, BCL11B, B3GALNT1, PARP14, CHRNA4, KCNH2, CDH23	717	129	12297	1.99426	0.996665	0.190411	21.5796
KEGG_PATHWAY	mmu04151:PI3K-Akt signaling pathway	23	3.15068	0.0249606	PIK3CG, IL2RB, SGK3, OSMR, EFNA1, TLR2, COL2A1, ITGB3, KIT, COL5A3, PCK2, LAMA1, LAMB2, ITGA6, PDGFRA, COL6A2, NOS3, LAMC2, PDGFD, THBS1, CSF1R, GHR, GNG7	269	236	4454	1.61367	0.997014	0.440874	27.6798
UP_KEYWORDS	Inflammatory response	9	1.23288	0.0184621	PIK3CG, RPS6KA4, SMPDL3B, SEMA7A, CHST2, TLR2, IL17RE, AIM2, CSF1R	717	58	12297	2.6613	0.997229	0.189664	22.1968
UP_KEYWORDS	Amidation	3	0.410959	0.0187758	CALCA, SCT, NMB	717	4	12297	12.863	0.997495	0.186604	22.5311
INTERPRO	IPR017970:Homeobox, conserved site	13	1.78082	0.00537431	IRX4, CDX1, OTX1, PAX6, HOXD13, HOXB13, VAX2, HOXC6, MSX3, ISL2, HOXA3, NKX2-5, TLX1	694	87	11604	2.49846	0.998163	0.40842	8.31719
INTERPRO	IPR015919:Cadherin-like	7	0.958904	0.00539611	DSG2, PCDH12, CDH1, CDH2, CDH4, CDH5, CDH23	694	28	11604	4.18012	0.998209	0.385255	8.34956
UP_SEQ_FEATURE	DNA-binding region:Homeobox	13	1.78082	0.00358685	HOXC6, MSX3, POU6F1, CDX1, ISL2, HOXA3, OTX1, PAX6, HOXB13, HOXD13, VAX2, NKX2-5, TLX1	641	86	11138	2.6266	0.99835	0.347617	5.91313
UP_KEYWORDS	Potassium channel	6	0.821918	0.0212378	TMEM175, HCN2, KCNQ5, KCNS1, KCNK13, KCNH2	717	28	12297	3.67513	0.998868	0.202373	25.1085
INTERPRO	IPR027397:Catenin binding domain	5	0.684932	0.00584235	DSG2, CDH1, CDH2, CDH4, CDH5	694	13	11604	6.43095	0.99894	0.386924	9.00993
INTERPRO	IPR000240:Serpin B9/maspin	4	0.547945	0.00619118	SERPINB9B, SERPINB9G, SERPINB9F, SERPINB9D	694	7	11604	9.55455	0.999297	0.383686	9.52304
INTERPRO	IPR001781:Zinc finger, LIM-type	10	1.36986	0.00625739	CRIP1, ISL2, LIMK2, LIMCH1, MICAL2, PDLIM4, PDLIM2, LMO7, MICAL1, ZYX	694	57	11604	2.93341	0.99935	0.367843	9.62012
SMART	SM00460:TGc	3	0.410959	0.0257098	NGLY1, TGM1, TGM2	435	4	6322	10.9	0.999387	0.560403	29.1882
SMART	SM01055:SM01055	3	0.410959	0.0257098	CDH1, CDH2, CDH4	435	4	6322	10.9	0.999387	0.560403	29.1882
UP_KEYWORDS	Myosin	6	0.821918	0.0244695	MYO6, MYL6B, MYO1B, MYH14, MYH9, MYH7B	717	29	12297	3.54841	0.999602	0.22317	28.3714
UP_KEYWORDS	Disease mutation	8	1.09589	0.0248056	MYO6, MITF, PAX6, COL2A1, RORA, KIT, LPIN1, CDH23	717	50	12297	2.7441	0.999643	0.219675	28.7031
KEGG_PATHWAY	mmu04923:Regulation of lipolysis in adipocytes	7	0.958904	0.0341311	PIK3CG, IRS3, PTGS2, ADCY5, MGLL, ADORA1, LIPE	269	41	4454	2.82691	0.99966	0.516215	35.9315
INTERPRO	IPR000742:Epidermal growth factor-like domain	16	2.19178	0.00695977	MATN2, LTBP1, PTGS2, LTBP4, MATN1, TMEM8, HMCN2, LAMA1, THBD, LAMB2, CNTNAP1, VCAN, LAMC2, FBN2, LRP2, THBS1	694	124	11604	2.15748	0.999715	0.381377	10.644
UP_SEQ_FEATURE	short sequence motif:WSXWS motif	6	0.821918	0.0046438	IL2RB, IL12RB1, OSMR, LEPR, CRLF2, GHR	641	20	11138	5.21279	0.999751	0.404705	7.59179
UP_KEYWORDS	Serine protease inhibitor	5	0.684932	0.0261733	SERPINE2, SERPINE1, TFPI, SERPINB1A, WFDC2	717	20	12297	4.28766	0.999771	0.224283	30.0381
GOTERM_CC_DIRECT	GO:0005882~intermediate filament	7	0.958904	0.0188729	KRT18, DES, KRT7, KRT8, MNS1, DSP, GJA1	666	37	11424	3.24519	0.99978	0.330367	23.6326
GOTERM_MF_DIRECT	GO:0019955~cytokine binding	5	0.684932	0.0104575	IL12RB1, OSMR, KIT, CD74, CSF1R	622	15	10304	5.52197	0.999829	0.545449	14.9577
KEGG_PATHWAY	mmu04723:Retrograde endocannabinoid signaling	8	1.09589	0.0378181	GABRG3, PTGS2, ADCY5, MGLL, CACNA1C, DAGLB, GNG7, ITPR2	269	53	4454	2.49926	0.999859	0.522365	38.9972
KEGG_PATHWAY	mmu05204:Chemical carcinogenesis	5	0.684932	0.0397329	GSTM4, PTGS2, ALDH3B2, GSTM5, GSTP1	269	22	4454	3.7631	0.999911	0.511939	40.5354
UP_KEYWORDS	Synapse	20	2.73973	0.0302718	LRRC4, PHACTR1, GABRG3, WASF1, SYT11, RUSC1, RIMBP2, NCS1, LRRC4B, NRN1, PTPRN, SYNGR3, RGS14, AMPH, SLC17A5, SARM1, RASGRP2, CHRNA4, UNC13B, LRFN3	717	205	12297	1.67323	0.99994	0.248509	33.9016
UP_KEYWORDS	Ion transport	28	3.83562	0.0303603	LRRC8E, SLC5A5, KCNJ10, KCNK13, TMEM175, KCNQ5, KCNS1, ATP2B4, KCNK6, SLC30A4, CHRNA4, SLCO3A1, SLC39A4, TMC6, HCN2, GABRG3, TMC8, ATP1A3, ITPR2, KCNN4, ATP2C2, SLC4A11, ATP2A3, CACNA1H, KCNH2, CACNA1C, SLC40A1, KCTD14	717	317	12297	1.51488	0.999941	0.242973	33.9827
GOTERM_BP_DIRECT	GO:0009966~regulation of signal transduction	7	0.958904	0.00341519	ACVR1B, SPRY1, MGLL, AFAP1L2, CDH2, SPRED1, RUNX1	633	26	10723	4.56076	0.999948	0.560281	5.94838
UP_SEQ_FEATURE	domain:COS	4	0.547945	0.00555172	TRIM36, TRIM54, MID1, MID2	641	7	11138	9.92913	0.999951	0.442281	9.01122
GOTERM_CC_DIRECT	GO:0030141~secretory granule	9	1.23288	0.0222257	RAB11FIP5, RAB3B, STXBP5, FSTL3, TGFB3, PTPRN, THBS1, TGFB1, RAB27A	666	60	11424	2.57297	0.999952	0.363373	27.2437
GOTERM_CC_DIRECT	GO:0030424~axon	24	3.28767	0.0224997	HCN2, MYO6, KIF5A, SYT11, UCHL1, ATP1A3, NCS1, CDH1, DPYSL2, LDLRAP1, TGFB1, STAU2, SDC3, ITPR2, CALCA, ATAT1, SARM1, PDGFRA, MGLL, CNTNAP1, MYH14, PRSS12, LRFN3, KIF13B	666	253	11424	1.62718	0.999957	0.354238	27.5317
UP_KEYWORDS	Cilium biogenesis/degradation	13	1.78082	0.0314078	BBS9, AHI1, ARL6, PTPDC1, WDR19, GSN, CC2D2A, CEP290, WDR35, INTU, TUBB4A, PARVA, NPHP1	717	113	12297	1.97308	0.999958	0.244301	34.9369
SMART	SM00831:SM00831	4	0.547945	0.0350333	ATP2C2, ATP2B4, ATP2A3, ATP1A3	435	11	6322	5.28485	0.99996	0.636796	37.6597
GOTERM_CC_DIRECT	GO:0005916~fascia adherens	4	0.547945	0.022798	DES, DSP, GJA1, CDH2	666	11	11424	6.23751	0.999963	0.346049	27.844
UP_KEYWORDS	Voltage-gated channel	8	1.09589	0.0329941	HCN2, KCNQ5, KCNS1, CACNA1H, KCNJ10, KCNK13, KCNH2, CACNA1C	717	53	12297	2.58877	0.999975	0.249143	36.3575
GOTERM_CC_DIRECT	GO:0002102~podosome	6	0.821918	0.0244337	GSN, FSCN1, KIF9, AFAP1L1, RHOU, LCP1	666	29	11424	3.54893	0.999982	0.354257	29.5344
GOTERM_MF_DIRECT	GO:0042802~identical protein binding	43	5.89041	0.0132669	HACL1, CLDN7, MTSS1, CLDN4, STK10, PPARG, GOT1L1, TGFB3, KCNJ10, ITGB3, GSTM5, DES, BAG2, PRKRA, CEP290, CDA, MNS1, TCF4, ENTPD1, ECI1, HCN2, DNMT3A, FOXJ2, SUN2, AHI1, TPD52L1, NPR2, MID1, WAS, PPP1R13L, AIM2, TRADD, STAT2, STOM, ATF6, PYCR1, HSPB8, RIPK3, PON2, KCNH2, EIF2AK3, MAPRE3, LCP1	622	491	10304	1.45078	0.999984	0.600764	18.6036
GOTERM_BP_DIRECT	GO:0008285~negative regulation of cell proliferation	29	3.9726	0.00382422	ACVRL1, PTGS2, PPARG, PAX6, TGFB3, TLR2, GJA1, ADORA1, TGFB1, CDH5, VDR, SPRY1, SERPINE2, CDKN2C, BCL11B, NDRG1, NOS3, RUNX1, CSF1R, PTPRJ, FBXO2, CTH, BTG2, IRF6, GDF11, NRK, RIPPLY3, IGFBP3, NFIB	633	278	10723	1.76712	0.999984	0.57234	6.63797
GOTERM_BP_DIRECT	GO:0045766~positive regulation of angiogenesis	12	1.64384	0.00383463	GATA2, ACVRL1, LGALS3, CYSLTR1, SERPINE1, NOS3, ITGB3, RUNX1, THBS1, CTSH, VASH2, ALOX12	633	74	10723	2.74702	0.999984	0.546565	6.65546
GOTERM_CC_DIRECT	GO:0005902~microvillus	8	1.09589	0.024755	PROM2, MYO6, PLEKHG6, FSCN1, PDGFRA, KCNJ10, TGFB1, KIF13B	666	50	11424	2.7445	0.999985	0.34697	29.8622
INTERPRO	IPR017903:COS domain	4	0.547945	0.00946947	TRIM36, TRIM54, MID1, MID2	694	8	11604	8.36023	0.999985	0.460936	14.2143
INTERPRO	IPR001024:Lipoxygenase, LH2	4	0.547945	0.00946947	LPL, LIPG, DENND5B, ALOX12	694	8	11604	8.36023	0.999985	0.460936	14.2143
GOTERM_CC_DIRECT	GO:0042995~cell projection	43	5.89041	0.0252355	TTC26, GPR161, BBS9, ADCY5, TLR2, AFAP1L1, ITGB3, RHOU, MDK, MBP, WDR19, SLC1A3, ATP2B4, ATAT1, PLEKHG6, RASGRP2, ATP8B1, CEP290, CIB2, WDR35, LRFN3, TUBB4A, NPHP1, PTPRJ, MYO6, ARHGEF6, PODXL, FSCN1, AHI1, DPYSL3, PTPRN, ARL6, RGS14, AMIGO1, PROM2, SARM1, IFT57, CC2D2A, SLC18A2, DBN1, ARL4C, LCP1, PARVB	666	530	11424	1.39167	0.999988	0.341912	30.3496
GOTERM_BP_DIRECT	GO:0097284~hepatocyte apoptotic process	5	0.684932	0.00404337	PIK3CG, DNMT3A, KRT18, GSN, KRT8	633	12	10723	7.05832	0.999992	0.540878	7.00546
UP_KEYWORDS	Calmodulin-binding	12	1.64384	0.0369972	KCNN4, AEBP1, CTH, MYO6, ATP2B4, MYO1B, PHKA1, AKAP5, PPP3CC, NOS3, MYH14, MYH9	717	103	12297	1.99813	0.999993	0.269113	39.8159
UP_KEYWORDS	EGF-like domain	13	1.78082	0.0374065	MATN2, HMCN2, THBD, LTBP1, TMEM8B, LTBP4, MATN1, TMEM8, VCAN, CNTNAP1, FBN2, LRP2, THBS1	717	116	12297	1.92205	0.999994	0.265748	40.1595
BIOCARTA	m_PPARgPathway:Role of PPAR-gamma Coactivators in Obesity and Thermogenesis	3	0.410959	0.0899033	LPL, NCOA1, PPARG	62	8	941	5.69153	0.999994	0.999994	66.5135
GOTERM_BP_DIRECT	GO:0009409~response to cold	7	0.958904	0.00417608	LPL, FOS, SLC27A1, LRP11, PPARG, ACADL, VGF	633	27	10723	4.39184	0.999994	0.529421	7.22735
UP_KEYWORDS	Lipid metabolism	26	3.56164	0.0379432	SLC27A1, SGMS2, PTGS2, EHHADH, ABHD4, PLBD1, ACOX3, PLBD2, MTMR1, SMPDL3B, MGLL, ECI1, LPL, PLD2, PLD4, ACADL, LDLRAP1, DAGLB, PLA2G4A, MLYCD, LIPG, LIPH, LIPE, SMPD3, PLCXD2, ALOX12	717	295	12297	1.51158	0.999995	0.263308	40.6073
KEGG_PATHWAY	mmu04024:cAMP signaling pathway	13	1.78082	0.0526483	PIK3CG, FOS, HCN2, PLD2, ATP2B4, ADCY5, PDE4B, ATP1A3, PDE4D, CACNA1C, ADORA1, LIPE, ACOX3	269	119	4454	1.80882	0.999996	0.588743	50.0122
SMART	SM00239:C2	12	1.64384	0.0430544	RAB11FIP5, PLA2G4A, RAB11FIP2, UNC13D, BAIAP3, SYT11, CC2D2A, SYT13, PRKCH, UNC13B, RASA4, MYOF	435	90	6322	1.93778	0.999996	0.678971	44.1875
UP_KEYWORDS	Potassium	8	1.09589	0.0393518	TMEM175, HCN2, KCNQ5, KCNS1, ATP1A3, KCNJ10, KCNK13, KCNH2	717	55	12297	2.49464	0.999997	0.266132	41.768
GOTERM_CC_DIRECT	GO:0005891~voltage-gated calcium channel complex	4	0.547945	0.0291083	PDE4B, CACNA1H, PDE4D, CACNA1C	666	12	11424	5.71772	0.999998	0.37269	34.1647
KEGG_PATHWAY	mmu04022:cGMP-PKG signaling pathway	12	1.64384	0.0552965	ATP2B4, IRS3, RGS2, ATP2A3, ADCY5, ATP1A3, PPP3CC, NOS3, NPR2, CACNA1C, ADORA1, ITPR2	269	107	4454	1.85693	0.999998	0.581979	51.7743
INTERPRO	IPR013032:EGF-like, conserved site	14	1.91781	0.0111369	MATN2, LTBP1, LTBP4, MATN1, TMEM8, HMCN2, LAMA1, THBD, TMEM8B, VCAN, LAMC2, FBN2, LRP2, THBS1	694	107	11604	2.18772	0.999998	0.497952	16.512
UP_KEYWORDS	Prenylation	13	1.78082	0.041829	RAB3B, RAB8B, RAB3D, UCHL1, PHKA1, ALDH3B2, RND3, RAB32, DIRAS2, PALM3, DNAJA4, RAB27A, GNG7	717	118	12297	1.88948	0.999999	0.274929	43.7583
SMART	SM00033:CH	9	1.23288	0.0469595	TAGLN, LIMCH1, MICAL2, ARHGEF6, LMO7, MICAL1, LCP1, PARVB, PARVA	435	59	6322	2.21695	0.999999	0.679642	47.1313
GOTERM_MF_DIRECT	GO:0050431~transforming growth factor beta binding	5	0.684932	0.0165689	ACVRL1, LTBP1, LTBP4, TGFB3, THBS1	622	17	10304	4.87233	0.999999	0.653647	22.7019
GOTERM_CC_DIRECT	GO:0043195~terminal bouton	9	1.23288	0.0314464	CALCA, SYT11, SYNJ1, SLC18A2, DPYSL2, UNC13B, ADORA1, PRSS12, AMPH	666	64	11424	2.41216	0.999999	0.385523	36.373
KEGG_PATHWAY	mmu05321:Inflammatory bowel disease (IBD)	5	0.684932	0.0597418	IL12RB1, TGFB3, TLR2, RORA, TGFB1	269	25	4454	3.31152	0.999999	0.587497	54.6041
GOTERM_MF_DIRECT	GO:0004896~cytokine receptor activity	6	0.821918	0.0179026	IL2RB, IL20RB, OSMR, LEPR, CD74, GHR	622	26	10304	3.8229	1	0.655112	24.3019
GOTERM_BP_DIRECT	GO:0071805~potassium ion transmembrane transport	8	1.09589	0.00522406	TMEM175, HCN2, KCNQ5, KCNS1, KCNK6, KCNJ10, KCNK13, KCNH2	633	37	10723	3.6627	1	0.588503	8.96202
UP_SEQ_FEATURE	domain:PLAT	4	0.547945	0.00850616	LPL, LIPG, DENND5B, ALOX12	641	8	11138	8.68799	1	0.570952	13.4894
UP_SEQ_FEATURE	site:Stutter	4	0.547945	0.00850616	KRT18, DES, KRT7, KRT8	641	8	11138	8.68799	1	0.570952	13.4894
GOTERM_MF_DIRECT	GO:0048185~activin binding	4	0.547945	0.0190039	ACVR1B, ACVRL1, FST, FSTL3	622	10	10304	6.62637	1	0.651902	25.5995
KEGG_PATHWAY	mmu04115:p53 signaling pathway	8	1.09589	0.0666256	CD82, SERPINE1, GADD45G, DDB2, THBS1, GADD45B, IGFBP3, SESN1	269	60	4454	2.20768	1	0.606564	58.6854
KEGG_PATHWAY	mmu04726:Serotonergic synapse	8	1.09589	0.0666256	PLA2G4A, PTGS2, ADCY5, SLC18A2, CACNA1C, ALOX12, GNG7, ITPR2	269	60	4454	2.20768	1	0.606564	58.6854
INTERPRO	IPR000233:Cadherin, cytoplasmic domain	4	0.547945	0.0135804	CDH1, CDH2, CDH4, CDH5	694	9	11604	7.43132	1	0.550319	19.775
INTERPRO	IPR010473:Diaphanous GTPase-binding	4	0.547945	0.0135804	INF2, FMNL1, FMNL2, DAAM2	694	9	11604	7.43132	1	0.550319	19.775
INTERPRO	IPR010472:Diaphanous FH3	4	0.547945	0.0135804	INF2, FMNL1, FMNL2, DAAM2	694	9	11604	7.43132	1	0.550319	19.775
GOTERM_BP_DIRECT	GO:0009636~response to toxic substance	10	1.36986	0.00573818	FOS, DNMT3A, SLC18A2, SLC30A4, TTPA, TLR2, PON2, CDH1, GSTP1, MBP	633	57	10723	2.97192	1	0.602035	9.80177
GOTERM_CC_DIRECT	GO:0005901~caveola	9	1.23288	0.036916	VDR, PLD2, SLC27A1, PTGS2, CACNA1H, NOS3, SPRED1, MYOF, LIPE	666	66	11424	2.33907	1	0.425462	41.273
GOTERM_CC_DIRECT	GO:0031594~neuromuscular junction	7	0.958904	0.0369639	DES, SERPINE2, FCHSD2, MYH9, CIB2, UNC13B, SYNGR3	666	43	11424	2.79237	1	0.415513	41.3143
GOTERM_CC_DIRECT	GO:0016328~lateral plasma membrane	7	0.958904	0.0369639	CLDN7, NKD2, CLDN4, DSG2, TACSTD2, GJA1, CDH1	666	43	11424	2.79237	1	0.415513	41.3143
UP_KEYWORDS	Flavoprotein	11	1.50685	0.0522976	KDM1B, SQRDL, CHDH, ERO1LB, MICAL2, PNPO, NOS3, MICAL1, ACADL, SARDH, ACOX3	717	96	12297	1.96518	1	0.326145	51.4937
SMART	SM00181:EGF	13	1.78082	0.0583875	MATN2, HMCN2, LAMA1, THBD, LTBP1, LAMB2, LTBP4, MATN1, LAMC2, VCAN, FBN2, LRP2, THBS1	435	106	6322	1.78239	1	0.731337	54.9419
SMART	SM00308:LH2	3	0.410959	0.0586325	LPL, LIPG, ALOX12	435	6	6322	7.26667	1	0.706447	55.097
KEGG_PATHWAY	mmu04020:Calcium signaling pathway	11	1.50685	0.072376	HRH1, ATP2B4, CYSLTR1, ATP2A3, PHKA1, PDGFRA, CACNA1H, PPP3CC, NOS3, CACNA1C, ITPR2	269	99	4454	1.83974	1	0.617099	61.8324
SMART	SM00353:HLH	9	1.23288	0.0600243	NCOA1, HEY1, MITF, TFEB, TCF4, MXI1, TCF15, SIM2, TWIST1	435	62	6322	2.10968	1	0.690252	55.9688
UP_KEYWORDS	Basement membrane	5	0.684932	0.0544133	LAMA1, SMOC2, LAMB2, LAMC2, ANXA2	717	25	12297	3.43013	1	0.330899	52.9321
UP_KEYWORDS	Osteogenesis	5	0.684932	0.0544133	KAZALD1, FSTL3, NPR2, TMEM119, BMP6	717	25	12297	3.43013	1	0.330899	52.9321
KEGG_PATHWAY	mmu05140:Leishmaniasis	6	0.821918	0.0751179	FOS, CYBA, PTGS2, TGFB3, TLR2, TGFB1	269	38	4454	2.61436	1	0.611433	63.2538
KEGG_PATHWAY	mmu04380:Osteoclast differentiation	10	1.36986	0.0761039	PIK3CG, FOS, CYBA, PPARG, MITF, PPP3CC, ITGB3, TGFB1, CSF1R, STAT2	269	87	4454	1.90317	1	0.597592	63.7528
GOTERM_CC_DIRECT	GO:0045335~phagocytic vesicle	6	0.821918	0.040407	FMNL1, RAB32, RAB8B, SYT11, PLD4, ANXA11	666	33	11424	3.11876	1	0.434311	44.2145
INTERPRO	IPR001715:Calponin homology domain	10	1.36986	0.0160217	TAGLN, LIMCH1, MICAL2, ARHGEF6, LMO7, MICAL1, MAPRE3, LCP1, PARVB, PARVA	694	66	11604	2.5334	1	0.593063	22.9153
INTERPRO	IPR003124:WH2 domain	5	0.684932	0.0160773	INF2, MTSS1, WASF1, PXK, WAS	694	17	11604	4.91778	1	0.577358	22.9854
UP_KEYWORDS	Keratin	3	0.410959	0.0584808	KRT18, KRT7, KRT8	717	7	12297	7.35027	1	0.345028	55.5871
UP_KEYWORDS	Deafness	3	0.410959	0.0584808	MYO6, MITF, CDH23	717	7	12297	7.35027	1	0.345028	55.5871
SMART	SM00409:IG	17	2.32877	0.0651153	LRRC4, IGDCC4, HAPLN4, CADM4, LRRC4B, KIT, AMIGO1, HMCN2, CILP2, KAZALD1, PECAM1, PDGFRA, VCAN, MFAP3L, LRFN3, CSF1R, KALRN	435	155	6322	1.59398	1	0.69734	59.0262
SMART	SM00498:FH2	4	0.547945	0.0663724	INF2, FMNL1, FMNL2, DAAM2	435	14	6322	4.15238	1	0.682513	59.7503
KEGG_PATHWAY	mmu04924:Renin secretion	6	0.821918	0.0821412	REN1, ADCY5, PPP3CC, CACNA1C, ADORA1, ITPR2	269	39	4454	2.54733	1	0.608883	66.6749
UP_SEQ_FEATURE	domain:WH2	5	0.684932	0.0112897	INF2, MTSS1, WASF1, PXK, WAS	641	16	11138	5.42999	1	0.655435	17.5181
GOTERM_MF_DIRECT	GO:0005125~cytokine activity	9	1.23288	0.0243411	CLCF1, CRLF2, CXCL16, TGFB3, GDF11, TGFB1, CMTM5, BMP6, THPO	622	59	10304	2.527	1	0.719341	31.5993
UP_SEQ_FEATURE	domain:Ig-like C2-type	9	1.23288	0.0113701	AMIGO1, HAPLN4, SEMA3G, SEMA4F, SEMA7A, KAZALD1, LRRC4B, SIGIRR, KALRN	641	54	11138	2.896	1	0.639208	17.6319
GOTERM_CC_DIRECT	GO:0016459~myosin complex	6	0.821918	0.0451934	MYO6, MYL6B, MYO1B, MYH14, MYH9, MYH7B	666	34	11424	3.02703	1	0.461745	48.0254
UP_KEYWORDS	FAD	10	1.36986	0.0658162	KDM1B, SQRDL, CHDH, ERO1LB, MICAL2, NOS3, MICAL1, ACADL, SARDH, ACOX3	717	87	12297	1.97134	1	0.373555	60.0279
KEGG_PATHWAY	mmu05414:Dilated cardiomyopathy	7	0.958904	0.0898424	DES, ITGA6, ADCY5, TGFB3, ITGB3, CACNA1C, TGFB1	269	52	4454	2.22891	1	0.626249	70.0872
KEGG_PATHWAY	mmu00982:Drug metabolism - cytochrome P450	4	0.547945	0.0900024	GSTM4, ALDH3B2, GSTM5, GSTP1	269	18	4454	3.67947	1	0.610594	70.1545
UP_SEQ_FEATURE	compositionally biased region:Pro/Ser/Thr-rich	4	0.547945	0.0122199	NPDC1, EBF2, PAX6, RUNX1	641	9	11138	7.72266	1	0.647929	18.8247
SMART	SM00179:EGF_CA	10	1.36986	0.0746801	MATN2, HMCN2, THBD, LTBP1, LTBP4, MATN1, VCAN, FBN2, LRP2, THBS1	435	76	6322	1.91228	1	0.706126	64.2461
UP_KEYWORDS	Muscle protein	5	0.684932	0.0689704	DES, TAGLN, MYL6B, PHKA1, MYH7B	717	27	12297	3.17604	1	0.381515	61.8079
KEGG_PATHWAY	mmu04921:Oxytocin signaling pathway	11	1.50685	0.0936554	FOS, PLA2G4A, PTGS2, RGS2, MYL6B, ADCY5, PPP3CC, NOS3, NPR2, CACNA1C, ITPR2	269	104	4454	1.75129	1	0.610302	71.6546
KEGG_PATHWAY	mmu04510:Focal adhesion	15	2.05479	0.0953783	PIK3CG, COL2A1, ITGB3, COL5A3, LAMA1, LAMB2, ITGA6, PDGFRA, COL6A2, LAMC2, ZYX, PDGFD, THBS1, PARVB, PARVA	269	159	4454	1.56204	1	0.602354	72.3377
SMART	SM00242:MYSc	5	0.684932	0.0781056	MYO6, MYO1B, MYH14, MYH9, MYH7B	435	24	6322	3.02778	1	0.703465	65.9608
GOTERM_CC_DIRECT	GO:0043025~neuronal cell body	29	3.9726	0.0511598	ACVRL1, LTBP1, UCHL1, TGFB3, VGF, ADORA1, TGFB1, STAU2, MBP, CALCA, SLC1A3, DAB1, SERPINE2, CHRNA4, ENTPD1, TUBB4A, GHR, HCN2, MYO6, KIF5A, DPYSL2, PTPRN, KCNN4, CYBA, SLC18A2, AKAP5, CACNA1C, DBN1, KALRN	666	348	11424	1.42943	1	0.494745	52.4371
INTERPRO	IPR014868:Cadherin prodomain	3	0.410959	0.0197112	CDH1, CDH2, CDH4	694	4	11604	12.5403	1	0.636454	27.4431
INTERPRO	IPR002931:Transglutaminase-like	3	0.410959	0.0197112	NGLY1, TGM1, TGM2	694	4	11604	12.5403	1	0.636454	27.4431
INTERPRO	IPR000734:Lipase	3	0.410959	0.0197112	LPL, LIPG, LIPH	694	4	11604	12.5403	1	0.636454	27.4431
INTERPRO	IPR019558:Mammalian uncoordinated homology 13, subgroup, domain 2	3	0.410959	0.0197112	UNC13D, BAIAP3, UNC13B	694	4	11604	12.5403	1	0.636454	27.4431
INTERPRO	IPR014772:Mammalian uncoordinated homology 13, domain 2	3	0.410959	0.0197112	UNC13D, BAIAP3, UNC13B	694	4	11604	12.5403	1	0.636454	27.4431
INTERPRO	IPR016272:Lipoprotein lipase, LIPH	3	0.410959	0.0197112	LPL, LIPG, LIPH	694	4	11604	12.5403	1	0.636454	27.4431
INTERPRO	IPR013818:Lipase, N-terminal	3	0.410959	0.0197112	LPL, LIPG, LIPH	694	4	11604	12.5403	1	0.636454	27.4431
GOTERM_MF_DIRECT	GO:0052689~carboxylic ester hydrolase activity	6	0.821918	0.0278778	LPL, SIAE, ABHD4, LIPG, MGLL, LIPH	622	29	10304	3.42743	1	0.746428	35.3226
SMART	SM00280:KAZAL	4	0.547945	0.0788936	SMOC2, KAZALD1, FST, FSTL3	435	15	6322	3.87556	1	0.688685	66.3443
GOTERM_BP_DIRECT	GO:0032526~response to retinoic acid	8	1.09589	0.00812102	NCOA1, SYNJ1, PPARG, RUNX1, IGFBP2, CTSH, AQP3, BMP6	633	40	10723	3.38799	1	0.709705	13.5992
UP_KEYWORDS	Signal-anchor	22	3.0137	0.0732508	FUT9, CCPG1, FAM69B, UST, CHST2, SUN2, EXTL1, CD74, SIGIRR, ATF6, FAM198B, XYLT1, ST8SIA4, B3GALNT1, ARXES2, HS6ST2, B4GALNT3, B3GNT3, MYOF, GGTA1, A3GALT2, B4GALNT1	717	257	12297	1.46815	1	0.39396	64.1063
GOTERM_BP_DIRECT	GO:0019221~cytokine-mediated signaling pathway	11	1.50685	0.0083784	LRRC4, IRAK3, IL2RB, RTN4RL1, IL20RB, LRRC4B, IL17RE, KIT, PTPRN, CISH, CSF1R	633	71	10723	2.6245	1	0.702521	14.0003
GOTERM_CC_DIRECT	GO:0043005~neuron projection	25	3.42466	0.0535103	PTGS2, KIF5A, SYT11, SYNJ1, QDPR, NMB, WRN, DPYSL2, VGF, NRADD, SDC3, CALCA, FOS, NCOA1, NPTX1, DAB1, ATP2B4, SLC1A3, RGS2, BCL11B, RASGRP2, SLC18A2, ENTPD1, KALRN, FAM126A	666	291	11424	1.47364	1	0.500681	54.0775
INTERPRO	IPR000008:C2 calcium-dependent membrane targeting	14	1.91781	0.020802	PIK3CG, BAIAP3, SYT11, PRKCH, C2CD2L, RAB11FIP5, RAB11FIP2, PLA2G4A, UNC13D, CC2D2A, SYT13, UNC13B, MYOF, RASA4	694	116	11604	2.01799	1	0.640815	28.7332
UP_SEQ_FEATURE	domain:C2 2	7	0.958904	0.0136933	UNC13D, BAIAP3, SYT11, SYT13, UNC13B, RASA4, MYOF	641	35	11138	3.4752	1	0.672886	20.8542
UP_SEQ_FEATURE	domain:C2 1	7	0.958904	0.0136933	UNC13D, BAIAP3, SYT11, SYT13, UNC13B, RASA4, MYOF	641	35	11138	3.4752	1	0.672886	20.8542
GOTERM_CC_DIRECT	GO:0031410~cytoplasmic vesicle	38	5.20548	0.054531	SLC27A1, NKD2, CLTB, RUSC1, NCS1, TLR2, VGF, AMPH, NPTX1, SLC30A4, SNX24, GPNMB, SLC39A4, MYOF, PRSS12, FMNL1, EPN3, ATG9B, RAB8B, MYO6, SGK3, SYT11, TECPR1, SPIRE2, PTPRN, SYNGR3, STOM, RAB11FIP5, RAB32, SLC17A5, PLA2G4A, ATP2C2, PROM2, TRIM36, SLC18A2, SYT13, AMOT, IGFBP2	666	485	11424	1.34396	1	0.497654	54.7734
UP_KEYWORDS	Cytoplasmic vesicle	29	3.9726	0.0794889	NKD2, CLTB, RUSC1, TLR2, AMPH, NPTX1, CEP290, SNX24, GPNMB, MYOF, FMNL1, EPN3, ATG9B, RAB8B, MYO6, SGK3, SYT11, SPIRE2, TECPR1, PTPRN, SYNGR3, STOM, RAB11FIP5, RAB32, PLA2G4A, SLC17A5, TRIM36, SLC18A2, SYT13	717	364	12297	1.3664	1	0.413829	67.2273
GOTERM_BP_DIRECT	GO:0060174~limb bud formation	4	0.547945	0.00912698	WNT3, PLXNA2, SOX11, COL2A1	633	8	10723	8.46998	1	0.715869	15.1567
GOTERM_BP_DIRECT	GO:0009952~anterior/posterior pattern specification	12	1.64384	0.00919174	HOXC6, T, CDX1, WNT3, TSHZ1, HOXA3, BTG2, OTX1, GDF11, PAX6, HOXD13, TCF15	633	83	10723	2.44915	1	0.701709	15.256
GOTERM_CC_DIRECT	GO:0032279~asymmetric synapse	3	0.410959	0.0584503	AKAP5, ADORA1, DBN1	666	7	11424	7.35135	1	0.512996	57.3552
GOTERM_CC_DIRECT	GO:0030118~clathrin coat	3	0.410959	0.0584503	KCNQ5, CLTB, SYNJ1	666	7	11424	7.35135	1	0.512996	57.3552
GOTERM_CC_DIRECT	GO:0001725~stress fiber	8	1.09589	0.0584769	CYBA, FSCN1, PDLIM2, ZYX, MYH14, MYH9, LCP1, ANXA2	666	60	11424	2.28709	1	0.50385	57.3722
INTERPRO	IPR003599:Immunoglobulin subtype	17	2.32877	0.0227512	LRRC4, IGDCC4, HAPLN4, CADM4, LRRC4B, KIT, AMIGO1, HMCN2, CILP2, KAZALD1, PECAM1, PDGFRA, VCAN, MFAP3L, LRFN3, CSF1R, KALRN	694	155	11604	1.83386	1	0.65909	30.9852
GOTERM_BP_DIRECT	GO:0006909~phagocytosis	8	1.09589	0.00930832	GATA2, UNC13D, GULP1, LEPR, PLD4, PECAM1, ANXA11, ELMO1	633	41	10723	3.30536	1	0.690202	15.4346
UP_KEYWORDS	Mitogen	4	0.547945	0.0835676	TGFB3, PDGFD, MDK, TGFB1	717	18	12297	3.81125	1	0.423931	69.13
GOTERM_CC_DIRECT	GO:0008076~voltage-gated potassium channel complex	6	0.821918	0.0614993	AMIGO1, KCNQ5, KCNS1, CNTNAP1, KCNH2, ABCC8	666	37	11424	2.78159	1	0.512929	59.2683
INTERPRO	IPR006068:Cation-transporting P-type ATPase, C-terminal	4	0.547945	0.0243954	ATP2C2, ATP2B4, ATP2A3, ATP1A3	694	11	11604	6.08017	1	0.670591	32.8326
INTERPRO	IPR014768:GTPase-binding/formin homology 3	4	0.547945	0.0243954	INF2, FMNL1, FMNL2, DAAM2	694	11	11604	6.08017	1	0.670591	32.8326
GOTERM_MF_DIRECT	GO:0001968~fibronectin binding	5	0.684932	0.0344532	FSTL3, ITGB3, THBS1, IGFBP3, IGFBP5	622	21	10304	3.94427	1	0.799502	41.7461
GOTERM_BP_DIRECT	GO:0060662~salivary gland cavitation	3	0.410959	0.00999815	TGM2, CDH1, NFIB	633	3	10723	16.94	1	0.700803	16.484
GOTERM_BP_DIRECT	GO:0010757~negative regulation of plasminogen activation	3	0.410959	0.00999815	SERPINE2, SERPINE1, THBS1	633	3	10723	16.94	1	0.700803	16.484
UP_KEYWORDS	Cell projection	38	5.20548	0.088476	TTC26, GPR161, BBS9, ADCY5, AFAP1L1, ITGB3, RHOU, WDR19, ATAT1, ATP2B4, PLEKHG6, RASGRP2, ATP8B1, CEP290, WDR35, CIB2, LRFN3, NPHP1, PTPRJ, MYO6, ARHGEF6, PODXL, FSCN1, AHI1, DPYSL3, PTPRN, ARL6, RGS14, AMIGO1, PROM2, SARM1, IFT57, CC2D2A, DBN1, INTU, ARL4C, LCP1, PARVB	717	506	12297	1.28799	1	0.436725	71.2841
GOTERM_MF_DIRECT	GO:0043565~sequence-specific DNA binding	35	4.79452	0.0348913	IRX4, POU6F1, CDX1, PPARG, MITF, PAX6, HOXD13, HOXB13, RORA, HOXC6, MSX3, GATA2, T, FOS, VDR, MEIS3, HOXA3, HEY1, BCL11B, HSF4, ETV6, NKX2-5, TLX1, CREBL2, SOX13, FOXJ2, TBX2, OTX1, DMRT2, VAX2, NR0B1, ATF6, ISL2, ZSCAN10, FOXC1	622	409	10304	1.41762	1	0.786064	42.1521
SMART	SM00255:TIR	3	0.410959	0.0999548	SARM1, TLR2, SIGIRR	435	8	6322	5.45	1	0.759298	75.229
GOTERM_BP_DIRECT	GO:0007156~homophilic cell adhesion via plasma membrane adhesion molecules	9	1.23288	0.0105056	AMIGO1, CADM4, DSG2, PCDH12, CDH1, CDH2, CDH4, CDH5, CDH23	633	52	10723	2.93192	1	0.704028	17.248
GOTERM_BP_DIRECT	GO:0031532~actin cytoskeleton reorganization	8	1.09589	0.0106178	PHACTR1, CDC42BPG, TNIK, KIT, MYH9, LPIN1, PARVB, PARVA	633	42	10723	3.22666	1	0.693713	17.4161
UP_SEQ_FEATURE	domain:Myosin head-like	5	0.684932	0.0173287	MYO6, MYO1B, MYH14, MYH9, MYH7B	641	18	11138	4.82666	1	0.742084	25.6596
INTERPRO	IPR009030:Insulin-like growth factor binding protein, N-terminal	11	1.50685	0.0275528	MATN2, HMCN2, THBD, LTBP1, LTBP4, KAZALD1, FBN2, IGFBP2, LRP2, IGFBP3, IGFBP5	694	84	11604	2.18958	1	0.701707	36.2511
UP_SEQ_FEATURE	domain:MHD2	3	0.410959	0.0183027	UNC13D, BAIAP3, UNC13B	641	4	11138	13.032	1	0.746486	26.8997
UP_SEQ_FEATURE	domain:TB 4	3	0.410959	0.0183027	LTBP1, LTBP4, FBN2	641	4	11138	13.032	1	0.746486	26.8997
GOTERM_CC_DIRECT	GO:0016327~apicolateral plasma membrane	4	0.547945	0.0726059	CLDN7, THBD, CLDN4, KRT8	666	17	11424	4.03604	1	0.565219	65.5832
GOTERM_BP_DIRECT	GO:0008217~regulation of blood pressure	7	0.958904	0.0115798	CALCA, CYBA, ACVRL1, PTGS2, REN1, PPARG, CACNA1C	633	33	10723	3.59333	1	0.711555	18.8438
INTERPRO	IPR002350:Kazal domain	5	0.684932	0.0284095	SMOC2, KAZALD1, FST, FSTL3, SLCO3A1	694	20	11604	4.18012	1	0.699789	37.1501
GOTERM_BP_DIRECT	GO:0019882~antigen processing and presentation	6	0.821918	0.0116725	RAB32, RAB3B, RAB8B, H2-D1, CD74, RAB27A	633	24	10723	4.23499	1	0.701355	18.9801
GOTERM_MF_DIRECT	GO:0001228~transcriptional activator activity, RNA polymerase II transcription regulatory region sequence-specific binding	9	1.23288	0.0405692	PAX9, KLF9, PPARG, PAX6, HOXD13, DMRT2, HSF4, RUNX1, NKX2-5	622	65	10304	2.29374	1	0.818839	47.1806
GOTERM_CC_DIRECT	GO:0016460~myosin II complex	3	0.410959	0.074994	SHROOM1, MYH14, MYH9	666	8	11424	6.43243	1	0.568459	66.8163
INTERPRO	IPR020479:Homeodomain, metazoa	7	0.958904	0.0300514	HOXC6, MSX3, CDX1, HOXA3, VAX2, NKX2-5, TLX1	694	40	11604	2.92608	1	0.707695	38.8398
INTERPRO	IPR011598:Myc-type, basic helix-loop-helix (bHLH) domain	9	1.23288	0.0303427	NCOA1, HEY1, MITF, TFEB, TCF4, MXI1, TCF15, SIM2, TWIST1	694	62	11604	2.42716	1	0.699005	39.1351
INTERPRO	IPR004014:Cation-transporting P-type ATPase, N-terminal	4	0.547945	0.0311128	ATP2C2, ATP2B4, ATP2A3, ATP1A3	694	12	11604	5.57349	1	0.696355	39.9095
INTERPRO	IPR000867:Insulin-like growth factor-binding protein, IGFBP	4	0.547945	0.0311128	KAZALD1, IGFBP2, IGFBP3, IGFBP5	694	12	11604	5.57349	1	0.696355	39.9095
INTERPRO	IPR023298:P-type ATPase, transmembrane domain	4	0.547945	0.0311128	ATP2C2, ATP2B4, ATP2A3, ATP1A3	694	12	11604	5.57349	1	0.696355	39.9095
GOTERM_MF_DIRECT	GO:0019903~protein phosphatase binding	10	1.36986	0.0412204	KCNN4, PPARG, PECAM1, CDH1, VCAN, CDH2, EIF2AK3, CDH5, CSF1R, GHR	622	77	10304	2.15142	1	0.808658	47.7305
GOTERM_MF_DIRECT	GO:0017124~SH3 domain binding	12	1.64384	0.0428277	CYBA, SYNJ1, EFS, GJA1, MICAL1, DPYSL3, AFAP1L2, CNTNAP1, LRP2, WAS, ERRFI1, ELMO1	622	102	10304	1.94893	1	0.8063	49.0648
GOTERM_CC_DIRECT	GO:0030027~lamellipodium	14	1.91781	0.0764652	PLD2, WASF1, PODXL, ARHGEF6, FSCN1, DPYSL3, CDH1, CDH2, NRADD, GSN, AMOT, DBN1, PARVB, PARVA	666	144	11424	1.66767	1	0.567051	67.5553
GOTERM_CC_DIRECT	GO:0009925~basal plasma membrane	5	0.684932	0.0768521	CLDN4, ITGA6, TACSTD2, SLCO3A1, LDLRAP1	666	28	11424	3.06306	1	0.560437	67.7472
GOTERM_CC_DIRECT	GO:0030672~synaptic vesicle membrane	6	0.821918	0.0807135	SLC17A5, SYT11, SLC18A2, ABCC8, SYNGR3, AMPH	666	40	11424	2.57297	1	0.570614	69.6046
GOTERM_BP_DIRECT	GO:0016043~cellular component organization	4	0.547945	0.0130972	INF2, FMNL1, FMNL2, DAAM2	633	9	10723	7.52887	1	0.730232	21.0484
GOTERM_BP_DIRECT	GO:0018149~peptide cross-linking	4	0.547945	0.0130972	TGM1, TGM2, DSP, THBS1	633	9	10723	7.52887	1	0.730232	21.0484
GOTERM_BP_DIRECT	GO:0021542~dentate gyrus development	4	0.547945	0.0130972	SCT, ATAT1, BTG2, MDK	633	9	10723	7.52887	1	0.730232	21.0484
GOTERM_BP_DIRECT	GO:0006911~phagocytosis, engulfment	4	0.547945	0.0130972	GULP1, GSN, MYH9, ELMO1	633	9	10723	7.52887	1	0.730232	21.0484
GOTERM_BP_DIRECT	GO:0006816~calcium ion transport	11	1.50685	0.0133284	VDR, KCNN4, ATP2C2, ATP2B4, CYSLTR1, ATP2A3, CHRNA4, CACNA1H, CACNA1C, CDH23, ITPR2	633	76	10723	2.45184	1	0.724461	21.3793
GOTERM_BP_DIRECT	GO:0034765~regulation of ion transmembrane transport	9	1.23288	0.014573	STOM, HCN2, KCNQ5, KCNS1, CACNA1H, KCNJ10, KCNK13, KCNH2, CACNA1C	633	55	10723	2.77199	1	0.744565	23.1382
GOTERM_BP_DIRECT	GO:0007179~transforming growth factor beta receptor signaling pathway	10	1.36986	0.0147876	FOS, ACVRL1, LTBP1, LTBP4, ZFYVE9, TGFB3, ZYX, BAMBI, TGFB1, CDH5	633	66	10723	2.56666	1	0.738613	23.4377
GOTERM_BP_DIRECT	GO:0030036~actin cytoskeleton organization	15	2.05479	0.0152198	FMNL1, INF2, FMNL2, MTSS1, WASF1, SSH2, PDLIM4, FSCN1, SPIRE2, RHOU, DAAM2, ELMO1, CORO2B, AMOT, PARVA	633	125	10723	2.0328	1	0.738	24.0376
GOTERM_BP_DIRECT	GO:0006629~lipid metabolic process	30	4.10959	0.0160637	SLC27A1, HACL1, PTGS2, SGMS2, EHHADH, ABHD4, PLBD1, PLBD2, ACOX3, MTMR1, SMPDL3B, MGLL, HMGCL, PLTP, ECI1, LPL, PLD2, PLD4, ACADL, LDLRAP1, LPIN1, DAGLB, PLA2G4A, MLYCD, LIPG, LIPH, LIPE, SMPD3, PLCXD2, ALOX12	633	324	10723	1.56852	1	0.746575	25.1961
GOTERM_BP_DIRECT	GO:0006813~potassium ion transport	9	1.23288	0.0161533	TMEM175, KCNN4, HCN2, KCNQ5, KCNS1, ATP1A3, KCNJ10, KCNK13, KCNH2	633	56	10723	2.72249	1	0.738408	25.3181
GOTERM_BP_DIRECT	GO:0007417~central nervous system development	10	1.36986	0.0162206	ACVR1B, HAPLN4, DAB1, AHI1, COL2A1, VCAN, RUNX1, CHRD, TLX1, MBP	633	67	10723	2.52835	1	0.729962	25.4096
GOTERM_BP_DIRECT	GO:0048015~phosphatidylinositol-mediated signaling	6	0.821918	0.0163964	PIK3CG, GSN, SYNJ1, PDGFRA, NCS1, CSF1R	633	26	10723	3.90922	1	0.724104	25.6482
GOTERM_BP_DIRECT	GO:0030308~negative regulation of cell growth	13	1.78082	0.0165717	PTPRJ, ACVR1B, CTH, CGREF1, ACVRL1, SERPINE2, CDKN2C, PPARG, GJA1, CDA, OSGIN1, SESN1, TGFB1	633	102	10723	2.15902	1	0.718428	25.8854
GOTERM_BP_DIRECT	GO:0007409~axonogenesis	11	1.50685	0.0171988	AMIGO1, RNF165, STXBP5, BCL11B, UCHL1, PAX6, VAX2, NRN1, LRFN3, DCLK1, KALRN	633	79	10723	2.35873	1	0.722519	26.728
GOTERM_BP_DIRECT	GO:0006935~chemotaxis	8	1.09589	0.0172091	PIK3CG, CYSLTR1, CXCL16, PDGFRA, AMOT, KIT, CMTM5, PARVA	633	46	10723	2.94608	1	0.713698	26.7418
GOTERM_BP_DIRECT	GO:0043407~negative regulation of MAP kinase activity	7	0.958904	0.0175476	PTPRJ, IRAK3, SPRY1, RGS2, UCHL1, RGS14, GSTP1	633	36	10723	3.29388	1	0.711892	27.1928
GOTERM_BP_DIRECT	GO:0007626~locomotory behavior	9	1.23288	0.0178538	MYO6, ADCY5, SLC18A2, CHRNA4, SEPP1, GPRC5B, FIG4, CDH23, GNG7	633	57	10723	2.67473	1	0.709507	27.5985
GOTERM_BP_DIRECT	GO:0045921~positive regulation of exocytosis	5	0.684932	0.0188613	UNC13D, STXBP5, NCS1, UNC13B, RAB27A	633	18	10723	4.70555	1	0.720909	28.9184
GOTERM_BP_DIRECT	GO:0002674~negative regulation of acute inflammatory response	3	0.410959	0.0192169	PPARG, ADORA1, GSTP1	633	4	10723	12.705	1	0.719437	29.3788
GOTERM_BP_DIRECT	GO:0021902~commitment of neuronal cell to specific neuron type in forebrain	3	0.410959	0.0192169	GATA2, BCL11B, PAX6	633	4	10723	12.705	1	0.719437	29.3788
GOTERM_BP_DIRECT	GO:0030259~lipid glycosylation	3	0.410959	0.0192169	GGTA1, A3GALT2, B4GALNT1	633	4	10723	12.705	1	0.719437	29.3788
GOTERM_BP_DIRECT	GO:0043010~camera-type eye development	8	1.09589	0.0192268	CC2D2A, MITF, PAX6, FOXC1, VAX2, HSF4, FBN2, CACNA1C	633	47	10723	2.8834	1	0.711587	29.3916
GOTERM_BP_DIRECT	GO:0030154~cell differentiation	42	5.75342	0.0218971	IRX4, RNF17, CDX1, TDRD7, MITF, PAX6, KIT, MDK, PAQR5, GATA2, METRN, DAB1, SERPINE2, SEMA7A, TDRKH, ETV6, TCF4, NKX2-5, DCLK1, CREBL2, NPHP1, TWIST1, SPATA24, SIM2, LGALS3, SOX11, PRKCH, DPYSL2, NR0B1, AMIGO1, SEMA6B, SARM1, TRIM54, IRF6, SEMA4F, KAZALD1, GADD45G, TMEM119, GADD45B, DBN1, TNFAIP2, BMP6	633	504	10723	1.41166	1	0.750212	32.7595
UP_SEQ_FEATURE	domain:GBD/FH3	4	0.547945	0.0220264	INF2, FMNL1, FMNL2, DAAM2	641	11	11138	6.31854	1	0.795764	31.4633
UP_SEQ_FEATURE	domain:Helix-loop-helix motif	9	1.23288	0.0227019	NCOA1, HEY1, MITF, TFEB, TCF4, MXI1, TCF15, SIM2, TWIST1	641	61	11138	2.56367	1	0.792945	32.2619
GOTERM_BP_DIRECT	GO:0010906~regulation of glucose metabolic process	5	0.684932	0.0228044	PDK2, MLYCD, RORA, IGFBP3, IGFBP5	633	19	10723	4.45789	1	0.756962	33.8689
UP_SEQ_FEATURE	repeat:LRR 6	11	1.50685	0.0234472	AMIGO1, LRRC8E, LRRC4, RTN4RL1, LRRN4, LRRC4B, TLR2, TPBG, LRRC49, FBXL16, LRFN3	641	85	11138	2.24866	1	0.791293	33.1328
GOTERM_BP_DIRECT	GO:0016339~calcium-dependent cell-cell adhesion via plasma membrane cell adhesion molecules	4	0.547945	0.0235556	PCDH12, CDH1, CDH2, CDH23	633	11	10723	6.15999	1	0.760988	34.7743
GOTERM_BP_DIRECT	GO:0042593~glucose homeostasis	11	1.50685	0.0254053	PDK2, ERO1LB, LEPR, PPARG, SLC18A2, PAX6, NMB, VGF, CACNA1C, GPRC5B, IGFBP5	633	84	10723	2.21833	1	0.779874	36.9541
GOTERM_BP_DIRECT	GO:0002062~chondrocyte differentiation	6	0.821918	0.0256138	WNT5B, MATN1, COL2A1, RUNX1, TGFB1, NFIB	633	29	10723	3.50482	1	0.77589	37.1955
UP_SEQ_FEATURE	domain:IGFBP N-terminal	4	0.547945	0.0281389	KAZALD1, IGFBP2, IGFBP3, IGFBP5	641	12	11138	5.79199	1	0.837575	38.3781
GOTERM_BP_DIRECT	GO:0002244~hematopoietic progenitor cell differentiation	9	1.23288	0.0283115	APOBEC3, PLD4, FST, FSTL3, PDGFRA, DHTKD1, SERPINB9F, SMPD3, TGFB1	633	62	10723	2.45903	1	0.802687	40.2405
GOTERM_BP_DIRECT	GO:0008542~visual learning	7	0.958904	0.028383	SCT, HRH1, LRRN4, ATP1A3, KIT, CACNA1C, RGS14	633	40	10723	2.96449	1	0.79726	40.3193
GOTERM_BP_DIRECT	GO:0001525~angiogenesis	18	2.46575	0.0290429	PIK3CG, ACVRL1, PTGS2, EFNA1, LEPR, HOXB13, RORA, MYH9, MMRN2, ANXA2, HOXA3, HEY1, SERPINE1, PECAM1, NOS3, EIF2AK3, TNFAIP2, PARVA	633	175	10723	1.7424	1	0.79864	41.0417
UP_SEQ_FEATURE	domain:TB 2	3	0.410959	0.0293509	LTBP1, LTBP4, FBN2	641	5	11138	10.4256	1	0.839841	39.6687
UP_SEQ_FEATURE	domain:PKD	3	0.410959	0.0293509	LRP11, GPNMB, SORCS2	641	5	11138	10.4256	1	0.839841	39.6687
UP_SEQ_FEATURE	domain:MHD1	3	0.410959	0.0293509	UNC13D, BAIAP3, UNC13B	641	5	11138	10.4256	1	0.839841	39.6687
UP_SEQ_FEATURE	domain:TB 1	3	0.410959	0.0293509	LTBP1, LTBP4, FBN2	641	5	11138	10.4256	1	0.839841	39.6687
UP_SEQ_FEATURE	domain:TB 3	3	0.410959	0.0293509	LTBP1, LTBP4, FBN2	641	5	11138	10.4256	1	0.839841	39.6687
UP_SEQ_FEATURE	domain:EGF-like 1	9	1.23288	0.0294048	MATN2, THBD, LTBP1, LTBP4, VCAN, CNTNAP1, FBN2, LRP2, THBS1	641	64	11138	2.4435	1	0.830319	39.7255
GOTERM_BP_DIRECT	GO:0019369~arachidonic acid metabolic process	4	0.547945	0.0300597	PLA2G4A, MGLL, DAGLB, ALOX12	633	12	10723	5.64666	1	0.803856	42.1388
GOTERM_BP_DIRECT	GO:1903307~positive regulation of regulated secretory pathway	3	0.410959	0.0307861	UNC13D, RAB3D, RAB27A	633	5	10723	10.164	1	0.805737	42.9107
GOTERM_BP_DIRECT	GO:0010936~negative regulation of macrophage cytokine production	3	0.410959	0.0307861	IRAK3, TGFB3, TGFB1	633	5	10723	10.164	1	0.805737	42.9107
GOTERM_BP_DIRECT	GO:0032534~regulation of microvillus assembly	3	0.410959	0.0307861	PODXL, FSCN1, ATP8B1	633	5	10723	10.164	1	0.805737	42.9107
GOTERM_BP_DIRECT	GO:0001960~negative regulation of cytokine-mediated signaling pathway	3	0.410959	0.0307861	IRAK3, PALM3, SIGIRR	633	5	10723	10.164	1	0.805737	42.9107
INTERPRO	IPR009168:Insulin-like growth factor binding protein	3	0.410959	0.0315609	IGFBP2, IGFBP3, IGFBP5	694	5	11604	10.0323	1	0.690113	40.3557
INTERPRO	IPR022321:Insulin-like growth factor-binding protein family 1-6, chordata	3	0.410959	0.0315609	IGFBP2, IGFBP3, IGFBP5	694	5	11604	10.0323	1	0.690113	40.3557
INTERPRO	IPR014770:Munc13 homology 1	3	0.410959	0.0315609	UNC13D, BAIAP3, UNC13B	694	5	11604	10.0323	1	0.690113	40.3557
GOTERM_BP_DIRECT	GO:0014003~oligodendrocyte development	5	0.684932	0.0320934	GSN, SOX11, KCNJ10, TGFB1, GSTP1	633	21	10723	4.03333	1	0.813393	44.2755
GOTERM_BP_DIRECT	GO:0097191~extrinsic apoptotic signaling pathway	6	0.821918	0.0332929	ACVR1B, KRT18, KRT8, G0S2, TGFB1, TRADD	633	31	10723	3.2787	1	0.819495	45.5005
GOTERM_BP_DIRECT	GO:0009887~organ morphogenesis	10	1.36986	0.0339919	VDR, WNT3, HOXA3, WNT5B, PAX9, TGM1, TGFB3, GDF11, PDGFRA, TGFB1	633	76	10723	2.22894	1	0.820651	46.2026
GOTERM_BP_DIRECT	GO:0035690~cellular response to drug	8	1.09589	0.0348726	ADSSL1, REN1, PDE4B, SERPINE1, SLC18A2, QDPR, KCNH2, AIM2	633	53	10723	2.55698	1	0.823397	47.0751
UP_SEQ_FEATURE	domain:EGF-like 12; calcium-binding	4	0.547945	0.035054	LTBP1, LTBP4, FBN2, LRP2	641	13	11138	5.34645	1	0.871568	45.4078
UP_SEQ_FEATURE	site:Reactive bond	4	0.547945	0.035054	SERPINE2, SERPINE1, TFPI, SERPINB1A	641	13	11138	5.34645	1	0.871568	45.4078
GOTERM_BP_DIRECT	GO:0007596~blood coagulation	7	0.958904	0.0351588	PTPRJ, THBD, PROCR, SERPINE2, TFPI, PDGFD, RAB27A	633	42	10723	2.82333	1	0.82079	47.3557
GOTERM_BP_DIRECT	GO:0009611~response to wounding	7	0.958904	0.0351588	SLC1A3, SERPINE2, SYT11, PAX6, MDK, TGFB1, LCP1	633	42	10723	2.82333	1	0.82079	47.3557
GOTERM_BP_DIRECT	GO:0045666~positive regulation of neuron differentiation	9	1.23288	0.036294	GATA2, NCOA1, DAB1, SOX11, HMG20B, TCF4, GPRC5B, NKX2-5, BMP6	633	65	10723	2.34553	1	0.82564	48.4551
INTERPRO	IPR001881:EGF-like calcium-binding	10	1.36986	0.0365724	MATN2, HMCN2, THBD, LTBP1, LTBP4, MATN1, VCAN, FBN2, LRP2, THBS1	694	76	11604	2.20006	1	0.732821	45.1395
GOTERM_BP_DIRECT	GO:0048260~positive regulation of receptor-mediated endocytosis	4	0.547945	0.0374063	PLD2, SYNJ1, SERPINE1, LDLRAP1	633	13	10723	5.2123	1	0.830032	49.5111
GOTERM_BP_DIRECT	GO:0050900~leukocyte migration	4	0.547945	0.0374063	ITGA6, PODXL, PDE4B, PDE4D	633	13	10723	5.2123	1	0.830032	49.5111
GOTERM_BP_DIRECT	GO:0010862~positive regulation of pathway-restricted SMAD protein phosphorylation	6	0.821918	0.0376143	ACVR1B, ACVRL1, TGFB3, GDF11, TGFB1, BMP6	633	32	10723	3.17624	1	0.826902	49.7064
UP_SEQ_FEATURE	domain:Fibronectin type-III 3	7	0.958904	0.0386413	PTPRJ, IGDCC4, IL12RB1, OSMR, LEPR, RIMBP2, BZRAP1	641	44	11138	2.76436	1	0.888725	48.7501
INTERPRO	IPR001111:Transforming growth factor-beta, N-terminal	4	0.547945	0.038694	TGFB3, GDF11, TGFB1, BMP6	694	13	11604	5.14476	1	0.74252	47.0541
INTERPRO	IPR000772:Ricin B lectin domain	4	0.547945	0.038694	AIM1L, MRC2, TECPR1, AIM1	694	13	11604	5.14476	1	0.74252	47.0541
INTERPRO	IPR005821:Ion transport domain	7	0.958904	0.041111	HCN2, KCNQ5, KCNS1, CACNA1H, KCNH2, CACNA1C, ITPR2	694	43	11604	2.72194	1	0.753928	49.1589
GOTERM_BP_DIRECT	GO:0050729~positive regulation of inflammatory response	6	0.821918	0.0422633	PLA2G4A, SERPINE1, TGM2, TLR2, GPRC5B, IL17RA	633	33	10723	3.07999	1	0.856949	53.888
UP_SEQ_FEATURE	domain:FH2	4	0.547945	0.0427584	INF2, FMNL1, FMNL2, DAAM2	641	14	11138	4.96456	1	0.905683	52.3485
GOTERM_BP_DIRECT	GO:0042391~regulation of membrane potential	7	0.958904	0.0428961	HCN2, CHRNA4, CACNA1H, KCNJ10, PXK, POPDC3, KCNH2	633	44	10723	2.69499	1	0.856862	54.4312
GOTERM_BP_DIRECT	GO:0071230~cellular response to amino acid stimulus	7	0.958904	0.0428961	DNMT3A, SLC38A9, PDGFRA, CDH1, PDGFD, RRAGD, SESN1	633	44	10723	2.69499	1	0.856862	54.4312
UP_SEQ_FEATURE	domain:CH	6	0.821918	0.0431171	TAGLN, LIMCH1, MICAL2, ARHGEF6, MICAL1, MAPRE3	641	34	11138	3.06635	1	0.900868	52.6505
GOTERM_BP_DIRECT	GO:0040007~growth	5	0.684932	0.0432969	TGFB3, GDF11, SEPP1, TGFB1, BMP6	633	23	10723	3.6826	1	0.855255	54.7721
GOTERM_BP_DIRECT	GO:0030322~stabilization of membrane potential	3	0.410959	0.0443975	KCNN4, KCNK6, KCNK13	633	6	10723	8.46998	1	0.858216	55.6958
GOTERM_MF_DIRECT	GO:0005516~calmodulin binding	14	1.91781	0.0445384	AEBP1, MYO6, MYO1B, PHKA1, MYH9, KCNN4, CTH, ATP2B4, AKAP5, PPP3CC, NOS3, MYH14, CACNA1C, UNC13B	622	128	10304	1.8119	1	0.8049	50.4499
INTERPRO	IPR013098:Immunoglobulin I-set	10	1.36986	0.0452139	AMIGO1, LRRC4, HMCN2, IGDCC4, KAZALD1, PDGFRA, LRRC4B, MFAP3L, LRFN3, KALRN	694	79	11604	2.11651	1	0.77741	52.5533
INTERPRO	IPR023753:Pyridine nucleotide-disulphide oxidoreductase, FAD/NAD(P)-binding domain	7	0.958904	0.0452986	KDM1B, SQRDL, CHDH, MICAL2, MICAL1, OSGIN1, SARDH	694	44	11604	2.66007	1	0.768834	52.6211
INTERPRO	IPR004009:Myosin, N-terminal, SH3-like	3	0.410959	0.0454907	MYH14, MYH9, MYH7B	694	6	11604	8.36023	1	0.761233	52.7745
GOTERM_BP_DIRECT	GO:0003203~endocardial cushion morphogenesis	4	0.547945	0.0455786	ACVRL1, HEY1, TBX2, TWIST1	633	14	10723	4.83999	1	0.861535	56.6672
UP_SEQ_FEATURE	repeat:LRR 5	11	1.50685	0.04571	AMIGO1, LRRC8E, LRRC4, RTN4RL1, LRRN4, LRRC4B, TLR2, TPBG, LRRC49, FBXL16, LRFN3	641	95	11138	2.01196	1	0.907772	54.7804
GOTERM_MF_DIRECT	GO:0005244~voltage-gated ion channel activity	8	1.09589	0.0459436	HCN2, KCNQ5, KCNS1, CACNA1H, KCNJ10, KCNK13, KCNH2, CACNA1C	622	55	10304	2.40959	1	0.801455	51.5612
GOTERM_BP_DIRECT	GO:0008284~positive regulation of cell proliferation	28	3.83562	0.0460558	CLDN7, PTGS2, OSMR, NMB, KIT, TGFB1, T, HOXA3, CLCF1, PRKRA, PDGFD, HSF4, THBS1, NKX2-5, TLX1, CSF1R, LGALS3, CCPG1, TBX2, SOX11, ZFP703, PLA2G4A, PDGFRA, SP6, LAMC2, BAMBI, CTSH, ALOX12	633	326	10723	1.45497	1	0.860456	57.0539
GOTERM_MF_DIRECT	GO:0022841~potassium ion leak channel activity	3	0.410959	0.046254	TMEM175, KCNK6, KCNK13	622	6	10304	8.28296	1	0.790454	51.8035
GOTERM_BP_DIRECT	GO:0001649~osteoblast differentiation	11	1.50685	0.046653	SEMA7A, MRC2, GJA1, VCAN, GPNMB, TMEM119, IGFBP3, CHRD, IGFBP5, BMP6, TWIST1	633	93	10723	2.00365	1	0.860127	57.5334
INTERPRO	IPR015425:Actin-binding FH2	4	0.547945	0.0471202	INF2, FMNL1, FMNL2, DAAM2	694	14	11604	4.77727	1	0.764668	54.0569
GOTERM_BP_DIRECT	GO:0071560~cellular response to transforming growth factor beta stimulus	7	0.958904	0.0471346	ACVRL1, SERPINE1, NOS3, PDGFD, RUNX1, DBN1, TGFB1	633	45	10723	2.63511	1	0.859117	57.9163
GOTERM_BP_DIRECT	GO:0030216~keratinocyte differentiation	6	0.821918	0.0472432	PTGS2, IRF6, TGM1, PAX6, DSP, INTU	633	34	10723	2.98941	1	0.855889	58.0022
GOTERM_BP_DIRECT	GO:0002230~positive regulation of defense response to virus by host	10	1.36986	0.0481928	STOM, MTSS1, CLDN7, IL12RB1, TNIK, SLC1A3, PNPO, D430041D05RIK, AIM2, STAT2	633	81	10723	2.09135	1	0.857726	58.7462
GOTERM_MF_DIRECT	GO:0005520~insulin-like growth factor binding	4	0.547945	0.048195	KAZALD1, IGFBP2, IGFBP3, IGFBP5	622	14	10304	4.73312	1	0.791402	53.2933
INTERPRO	IPR011993:Pleckstrin homology-like domain	30	4.10959	0.0483982	ARHGEF26, GULP1, RTKN, PTPN21, AFAP1L2, AFAP1L1, MTMR1, DAB1, PLEKHG6, PLEKHO2, SPRED1, RASA4, DOCK11, ARHGAP9, PLD2, IRS3, ARHGEF6, PSD4, TECPR1, LDLRAP1, WAS, ELMO1, TNS4, DOK1, PLEKHA6, CDC42BPG, PLEKHH3, PHLDB2, ARAP2, KALRN	694	352	11604	1.42504	1	0.765385	55.0399
INTERPRO	IPR001849:Pleckstrin homology domain	21	2.87671	0.0485352	PLD2, IRS3, ARHGEF26, ARHGEF6, PSD4, RTKN, AFAP1L2, AFAP1L1, ELMO1, DOK1, PLEKHA6, CDC42BPG, PLEKHH3, PLEKHG6, PLEKHO2, RASA4, ARAP2, DOCK11, PHLDB2, ARHGAP9, KALRN	694	225	11604	1.56058	1	0.757937	55.1441
GOTERM_BP_DIRECT	GO:0030334~regulation of cell migration	8	1.09589	0.0489999	LAMA1, PLXNA2, PECAM1, PAX6, AMOT, DPYSL3, ITGB3, SDC3	633	57	10723	2.37754	1	0.858674	59.3688
GOTERM_BP_DIRECT	GO:0098792~xenophagy	9	1.23288	0.0491155	STOM, MTSS1, CLDN7, TNIK, SLC1A3, PNPO, LGALS8, D430041D05RIK, STAT2	633	69	10723	2.20956	1	0.855614	59.4573
GOTERM_BP_DIRECT	GO:0007186~G-protein coupled receptor signaling pathway	17	2.32877	0.0511438	PIK3CG, GPR180, GPR157, CYSLTR1, BAIAP3, GPR161, GPR68, GPRC5B, GPRC5A, ADORA1, RGS14, S1PR3, HRH1, RGS2, TGM2, ENTPD1, GNG7	633	174	10723	1.65505	1	0.863411	60.9799
UP_SEQ_FEATURE	region of interest:Actin-binding	4	0.547945	0.0512322	MYO6, MYO1B, MYH9, MYH7B	641	15	11138	4.63359	1	0.926077	59.0199
UP_SEQ_FEATURE	region of interest:Linker 12	4	0.547945	0.0512322	KRT18, DES, KRT7, KRT8	641	15	11138	4.63359	1	0.926077	59.0199
UP_SEQ_FEATURE	DNA-binding region:Basic motif	11	1.50685	0.0514545	FOS, NCOA1, HEY1, MITF, TFEB, TCF4, MXI1, TCF15, CREBL2, SIM2, TWIST1	641	97	11138	1.97047	1	0.921575	59.1824
GOTERM_MF_DIRECT	GO:0050839~cell adhesion molecule binding	7	0.958904	0.0515548	CLDN7, CADM4, DSG2, PKP3, DSP, CDH1, ITGB3	622	45	10304	2.57692	1	0.801575	55.7706
GOTERM_BP_DIRECT	GO:0007565~female pregnancy	7	0.958904	0.0516235	FOS, THBD, CLDN4, TGFB3, IGFBP2, TGFB1, IGFBP5	633	46	10723	2.57782	1	0.862461	61.332
GOTERM_BP_DIRECT	GO:0060041~retina development in camera-type eye	7	0.958904	0.0516235	LAMA1, LAMB2, PAX6, CEP290, AHI1, VAX2, NPHP1	633	46	10723	2.57782	1	0.862461	61.332
INTERPRO	IPR001609:Myosin head, motor domain	5	0.684932	0.0516775	MYO6, MYO1B, MYH14, MYH9, MYH7B	694	24	11604	3.48343	1	0.771645	57.4726
GOTERM_MF_DIRECT	GO:0001077~transcriptional activator activity, RNA polymerase II core promoter proximal region sequence-specific binding	18	2.46575	0.0519064	FOXJ2, OTX1, SOX11, MITF, PAX6, TFEB, HOXD13, FOS, GATA2, MEIS3, BCL11B, EBF2, ETV6, TCF4, NKX2-5, TLX1, NFIB, TWIST1	622	184	10304	1.62058	1	0.79206	56.0227
UP_SEQ_FEATURE	domain:Sema	5	0.684932	0.0522537	SEMA6B, SEMA3G, PLXNA2, SEMA4F, SEMA7A	641	25	11138	3.4752	1	0.919394	59.7619
GOTERM_BP_DIRECT	GO:0051291~protein heterooligomerization	9	1.23288	0.0527266	TMEM120A, ACVRL1, RIPK3, CHRNA4, CDH2, KCNH2, GCHFR, TRADD, PARVA	633	70	10723	2.178	1	0.864857	62.1304
GOTERM_BP_DIRECT	GO:0007204~positive regulation of cytosolic calcium ion concentration	8	1.09589	0.0530244	PIK3CG, GATA2, ADCY5, PDGFRA, GJA1, NMB, CIB2, CACNA1C	633	58	10723	2.33655	1	0.86297	62.3432
GOTERM_BP_DIRECT	GO:0030030~cell projection organization	13	1.78082	0.0556268	BBS9, AHI1, ARL6, PTPDC1, WDR19, GSN, CC2D2A, CEP290, WDR35, INTU, TUBB4A, PARVA, NPHP1	633	122	10723	1.80508	1	0.872781	64.1558
GOTERM_BP_DIRECT	GO:0032870~cellular response to hormone stimulus	5	0.684932	0.056426	FOS, NCOA1, CACNA1H, IGFBP2, GHR	633	25	10723	3.38799	1	0.873374	64.6957
GOTERM_BP_DIRECT	GO:0050770~regulation of axonogenesis	5	0.684932	0.056426	EFNA1, UST, SSH2, CDH2, KIF13B	633	25	10723	3.38799	1	0.873374	64.6957
GOTERM_BP_DIRECT	GO:0046426~negative regulation of JAK-STAT cascade	5	0.684932	0.056426	LRRC4, DAB1, RTN4RL1, LRRC4B, CISH	633	25	10723	3.38799	1	0.873374	64.6957
GOTERM_MF_DIRECT	GO:0017048~Rho GTPase binding	6	0.821918	0.0568453	INF2, FMNL1, FMNL2, RTKN, DOCK11, DAAM2	622	35	10304	2.83987	1	0.810797	59.4239
UP_SEQ_FEATURE	glycosylation site:O-linked (Xyl...) (glycosaminoglycan)	3	0.410959	0.0570969	GPC4, THBD, SDC3	641	7	11138	7.44685	1	0.931972	63.1111
GOTERM_BP_DIRECT	GO:0006874~cellular calcium ion homeostasis	8	1.09589	0.0572501	CALCA, VDR, ATP2C2, ATP2B4, ATP2A3, ITGB3, CACNA1C, TGFB1	633	59	10723	2.29694	1	0.87407	65.2444
GOTERM_MF_DIRECT	GO:0017046~peptide hormone binding	4	0.547945	0.0576294	LEPR, NPR2, SLC40A1, GHR	622	15	10304	4.41758	1	0.804522	59.9407
GOTERM_BP_DIRECT	GO:0006811~ion transport	26	3.56164	0.0588979	LRRC8E, SLC5A5, KCNJ10, KCNK13, TMEM175, KCNQ5, KCNS1, ATP2B4, SLC30A4, CHRNA4, SLCO3A1, SLC39A4, TMC6, HCN2, GABRG3, TMC8, ATP1A3, ITPR2, KCNN4, ATP2C2, SLC4A11, ATP2A3, CACNA1H, CACNA1C, KCNH2, SLC40A1	633	305	10723	1.44406	1	0.878496	66.3174
GOTERM_BP_DIRECT	GO:0032930~positive regulation of superoxide anion generation	3	0.410959	0.0597711	CYBA, TGFB1, GSTP1	633	7	10723	7.25999	1	0.879314	66.8733
GOTERM_BP_DIRECT	GO:0098911~regulation of ventricular cardiac muscle cell action potential	3	0.410959	0.0597711	DSG2, DSP, CACNA1C	633	7	10723	7.25999	1	0.879314	66.8733
GOTERM_BP_DIRECT	GO:0008354~germ cell migration	3	0.410959	0.0597711	FOXC1, KIT, TGFB1	633	7	10723	7.25999	1	0.879314	66.8733
GOTERM_MF_DIRECT	GO:0030742~GTP-dependent protein binding	5	0.684932	0.0603314	RAB32, RAB3B, RAB3D, UNC13B, GCHFR	622	25	10304	3.31318	1	0.809112	61.6748
UP_SEQ_FEATURE	domain:EGF-like 6; calcium-binding	4	0.547945	0.0604498	THBD, LTBP1, LTBP4, LRP2	641	16	11138	4.34399	1	0.937926	65.2741
INTERPRO	IPR000601:PKD domain	3	0.410959	0.0612105	LRP11, GPNMB, SORCS2	694	7	11604	7.16591	1	0.820428	63.862
INTERPRO	IPR016243:Tyrosine-protein kinase, CSF-1/PDGF receptor	3	0.410959	0.0612105	PDGFRA, KIT, CSF1R	694	7	11604	7.16591	1	0.820428	63.862
GOTERM_MF_DIRECT	GO:0042578~phosphoric ester hydrolase activity	3	0.410959	0.0622157	PGAP1, SYNJ1, FIG4	622	7	10304	7.09968	1	0.809112	62.8424
GOTERM_MF_DIRECT	GO:0031995~insulin-like growth factor II binding	3	0.410959	0.0622157	IGFBP2, IGFBP3, IGFBP5	622	7	10304	7.09968	1	0.809112	62.8424
GOTERM_BP_DIRECT	GO:0007399~nervous system development	23	3.15068	0.0642701	MTSS1, FUT9, TNIK, SOX11, DPYSL3, MBNL1, DPYSL2, NRN1, AMIGO1, FOS, SEMA6B, METRN, DAB1, SARM1, SERPINE2, SEMA4F, SEMA7A, TCF4, DBN1, INTU, DCLK1, KALRN, SIM2	633	264	10723	1.47583	1	0.894844	69.6026
GOTERM_BP_DIRECT	GO:0009948~anterior/posterior axis specification	4	0.547945	0.0642999	CDX1, WNT3, HEY1, PGAP1	633	16	10723	4.23499	1	0.892169	69.62
GOTERM_BP_DIRECT	GO:0030048~actin filament-based movement	4	0.547945	0.0642999	MYO1B, MYH14, MYH9, WAS	633	16	10723	4.23499	1	0.892169	69.62
GOTERM_BP_DIRECT	GO:0017015~regulation of transforming growth factor beta receptor signaling pathway	4	0.547945	0.0642999	ZFYVE9, SOX11, ZFP703, TGFB1	633	16	10723	4.23499	1	0.892169	69.62
GOTERM_BP_DIRECT	GO:0022617~extracellular matrix disassembly	4	0.547945	0.0642999	LAMA1, LAMC2, KIF9, LCP1	633	16	10723	4.23499	1	0.892169	69.62
GOTERM_BP_DIRECT	GO:0086091~regulation of heart rate by cardiac conduction	4	0.547945	0.0642999	DSG2, DSP, KCNH2, CACNA1C	633	16	10723	4.23499	1	0.892169	69.62
GOTERM_BP_DIRECT	GO:0010628~positive regulation of gene expression	22	3.0137	0.0661216	SOX11, MITF, PAX6, TLR2, TGFB3, GJA1, AHI1, ITGB3, KIT, TGFB1, VDR, ACVR1B, WNT3, GSN, SERPINE1, FOXC1, EIF2AK3, CTSH, NKX2-5, TWIST1, ALOX12, RAB27A	633	251	10723	1.48478	1	0.896289	70.6629
UP_SEQ_FEATURE	domain:SH3 1	5	0.684932	0.0663115	ARHGEF37, RIMBP2, BZRAP1, FCHSD2, KALRN	641	27	11138	3.21777	1	0.9494	68.7717
INTERPRO	IPR012317:Poly(ADP-ribose) polymerase, catalytic domain	4	0.547945	0.066398	PARP16, ZC3HAV1, PARP14, PARP4	694	16	11604	4.18012	1	0.838842	66.9489
INTERPRO	IPR017948:Transforming growth factor beta, conserved site	4	0.547945	0.066398	TGFB3, GDF11, TGFB1, BMP6	694	16	11604	4.18012	1	0.838842	66.9489
GOTERM_BP_DIRECT	GO:0048146~positive regulation of fibroblast proliferation	7	0.958904	0.0666068	SERPINE1, PDGFRA, PDGFD, ITGB3, CD74, TGFB1, ANXA2	633	49	10723	2.42	1	0.89538	70.935
INTERPRO	IPR000483:Cysteine-rich flanking region, C-terminal	6	0.821918	0.0671872	AMIGO1, LRRC4, LRRC4B, TLR2, TPBG, LRFN3	694	37	11604	2.71143	1	0.835817	67.3962
INTERPRO	IPR016201:Plexin-like fold	6	0.821918	0.0671872	SEMA6B, SEMA3G, PLXNA2, SEMA4F, SEMA7A, ITGB3	694	37	11604	2.71143	1	0.835817	67.3962
GOTERM_MF_DIRECT	GO:0046982~protein heterodimerization activity	30	4.10959	0.0677308	ADCY5, TGFB3, TLR2, H2-D1, TFEB, RRAGD, NRN1, ADORA1, TGFB1, AMPH, FOS, IRAK3, HEY1, CLCF1, CHRNA4, TCF4, NKX2-5, TLX1, SIM2, TWIST1, PDK2, LIMK2, HMG20B, TPD52L1, MID1, MID2, ATF6, CYBA, MAPK4, BMP6	622	360	10304	1.38049	1	0.826806	66.0712
INTERPRO	IPR003591:Leucine-rich repeat, typical subtype	10	1.36986	0.0703767	AMIGO1, LRRC8E, LRRC4, RTN4RL1, LRRN4, LRRC4B, TLR2, TPBG, LRRC49, LRFN3	694	86	11604	1.94424	1	0.843475	69.147
GOTERM_BP_DIRECT	GO:0048514~blood vessel morphogenesis	5	0.684932	0.0714485	ACVRL1, GJA1, AMOT, CDH2, THBS1	633	27	10723	3.13703	1	0.909324	73.5222
GOTERM_BP_DIRECT	GO:0030501~positive regulation of bone mineralization	5	0.684932	0.0714485	TGFB3, FBN2, TMEM119, TGFB1, BMP6	633	27	10723	3.13703	1	0.909324	73.5222
GOTERM_BP_DIRECT	GO:0009612~response to mechanical stimulus	7	0.958904	0.0721085	SOST, BTG2, LRP11, PPARG, IGFBP2, THBS1, KALRN	633	50	10723	2.3716	1	0.908969	73.8575
UP_SEQ_FEATURE	repeat:III	3	0.410959	0.0732938	CACNA1H, ITGB3, CACNA1C	641	8	11138	6.51599	1	0.960499	72.5051
UP_SEQ_FEATURE	domain:EGF-like 13; calcium-binding	3	0.410959	0.0732938	LTBP1, LTBP4, FBN2	641	8	11138	6.51599	1	0.960499	72.5051
UP_SEQ_FEATURE	domain:DAD	3	0.410959	0.0732938	FMNL1, FMNL2, DAAM2	641	8	11138	6.51599	1	0.960499	72.5051
UP_SEQ_FEATURE	repeat:I	3	0.410959	0.0732938	CACNA1H, ITGB3, CACNA1C	641	8	11138	6.51599	1	0.960499	72.5051
UP_SEQ_FEATURE	repeat:II	3	0.410959	0.0732938	CACNA1H, ITGB3, CACNA1C	641	8	11138	6.51599	1	0.960499	72.5051
UP_SEQ_FEATURE	repeat:IV	3	0.410959	0.0732938	CACNA1H, ITGB3, CACNA1C	641	8	11138	6.51599	1	0.960499	72.5051
UP_SEQ_FEATURE	domain:SH3 2	5	0.684932	0.0740037	ARHGEF37, RIMBP2, BZRAP1, FCHSD2, KALRN	641	28	11138	3.10285	1	0.958748	72.8602
GOTERM_MF_DIRECT	GO:0051015~actin filament binding	12	1.64384	0.0742374	CORO2B, FMNL1, SHROOM1, MTSS1, ADSSL1, MYO6, MYO1B, FSCN1, MYH14, MYH9, DBN1, LCP1	622	112	10304	1.77492	1	0.846141	69.5429
INTERPRO	IPR023299:P-type ATPase, cytoplasmic domain N	5	0.684932	0.0742739	ATP2C2, ATP2B4, ATP2A3, ATP1A3, ATP8B1	694	27	11604	3.09638	1	0.85333	71.1664
INTERPRO	IPR018303:P-type ATPase, phosphorylation site	5	0.684932	0.0742739	ATP2C2, ATP2B4, ATP2A3, ATP1A3, ATP8B1	694	27	11604	3.09638	1	0.85333	71.1664
INTERPRO	IPR001757:Cation-transporting P-type ATPase	5	0.684932	0.0742739	ATP2C2, ATP2B4, ATP2A3, ATP1A3, ATP8B1	694	27	11604	3.09638	1	0.85333	71.1664
INTERPRO	IPR008250:P-type ATPase, A domain	5	0.684932	0.0742739	ATP2C2, ATP2B4, ATP2A3, ATP1A3, ATP8B1	694	27	11604	3.09638	1	0.85333	71.1664
GOTERM_BP_DIRECT	GO:0031668~cellular response to extracellular stimulus	4	0.547945	0.0747848	FOS, AES, ITGA6, BMP6	633	17	10723	3.98587	1	0.91471	75.1767
GOTERM_BP_DIRECT	GO:0030902~hindbrain development	4	0.547945	0.0747848	PAX6, CEP290, AHI1, NFIB	633	17	10723	3.98587	1	0.91471	75.1767
GOTERM_BP_DIRECT	GO:0035773~insulin secretion involved in cellular response to glucose stimulus	3	0.410959	0.0766525	RAB11FIP5, RAB11FIP2, PTPRN	633	8	10723	6.35249	1	0.917771	76.0598
GOTERM_BP_DIRECT	GO:0045603~positive regulation of endothelial cell differentiation	3	0.410959	0.0766525	ACVRL1, ALOX12, BMP6	633	8	10723	6.35249	1	0.917771	76.0598
GOTERM_BP_DIRECT	GO:0006939~smooth muscle contraction	3	0.410959	0.0766525	PDE4B, PDE4D, CACNA1C	633	8	10723	6.35249	1	0.917771	76.0598
GOTERM_BP_DIRECT	GO:0019953~sexual reproduction	3	0.410959	0.0766525	LEPR, SEPP1, VGF	633	8	10723	6.35249	1	0.917771	76.0598
GOTERM_BP_DIRECT	GO:0045785~positive regulation of cell adhesion	6	0.821918	0.077133	CALCA, PTPRJ, PLD2, TGM2, CHRD, ALOX12	633	39	10723	2.60615	1	0.916883	76.2822
GOTERM_BP_DIRECT	GO:0045165~cell fate commitment	6	0.821918	0.077133	WNT3, WNT5B, PPARG, MITF, PAX6, TLX1	633	39	10723	2.60615	1	0.916883	76.2822
GOTERM_BP_DIRECT	GO:0007219~Notch signaling pathway	10	1.36986	0.0781821	DTX4, S1PR3, HEY1, TBX2, APH1C, MIB2, PGAM2, FOXC1, NEURL1B, TGFB1	633	89	10723	1.90337	1	0.917579	76.7609
GOTERM_BP_DIRECT	GO:0055085~transmembrane transport	19	2.60274	0.0782464	HCN2, SLC5A5, GJA1, ITPR2, KCNQ5, SLC16A5, SLC17A5, KCNS1, SLC2A5, SLC37A1, SLC41A3, SLC18A2, SLC30A4, CACNA1H, KCNH2, CACNA1C, SLC39A4, SLC25A42, SLC43A1	633	213	10723	1.51108	1	0.915564	76.7899
INTERPRO	IPR001824:Tyrosine-protein kinase, receptor class III, conserved site	3	0.410959	0.0784575	PDGFRA, KIT, CSF1R	694	8	11604	6.27017	1	0.86329	73.196
INTERPRO	IPR017891:Insulin-like growth factor binding protein, N-terminal, Cys-rich conserved site	3	0.410959	0.0784575	IGFBP2, IGFBP3, IGFBP5	694	8	11604	6.27017	1	0.86329	73.196
INTERPRO	IPR014767:Diaphanous autoregulatory	3	0.410959	0.0784575	FMNL1, FMNL2, DAAM2	694	8	11604	6.27017	1	0.86329	73.196
INTERPRO	IPR003096:Smooth muscle protein/calponin	3	0.410959	0.0784575	TAGLN, ARHGEF6, LMO7	694	8	11604	6.27017	1	0.86329	73.196
GOTERM_BP_DIRECT	GO:0045429~positive regulation of nitric oxide biosynthetic process	5	0.684932	0.0796494	HRH1, PTGS2, TLR2, DDAH2, SMPD3	633	28	10723	3.02499	1	0.917235	77.4152
GOTERM_MF_DIRECT	GO:0004806~triglyceride lipase activity	3	0.410959	0.0797183	LPL, LIPG, LIPE	622	8	10304	6.21222	1	0.858889	72.2064
INTERPRO	IPR000152:EGF-type aspartate/asparagine hydroxylation site	8	1.09589	0.0805255	MATN2, HMCN2, THBD, LTBP1, LTBP4, VCAN, FBN2, LRP2	694	63	11604	2.12323	1	0.865054	74.149
UP_SEQ_FEATURE	region of interest:Ligand-binding	4	0.547945	0.0809911	VDR, PPARG, RORA, NR0B1	641	18	11138	3.86133	1	0.96737	76.1325
INTERPRO	IPR001627:Semaphorin/CD100 antigen	5	0.684932	0.0827499	SEMA6B, SEMA3G, PLXNA2, SEMA4F, SEMA7A	694	28	11604	2.9858	1	0.867272	75.1385
GOTERM_MF_DIRECT	GO:0004860~protein kinase inhibitor activity	6	0.821918	0.0830899	LRRC4, RTN4RL1, LRRC4B, CAMK2N2, CISH, TRIB2	622	39	10304	2.5486	1	0.863021	73.735
GOTERM_BP_DIRECT	GO:0009749~response to glucose	7	0.958904	0.0838687	LPL, SARM1, COL6A2, GJA1, PTPRN, THBS1, TGFB1	633	52	10723	2.28038	1	0.925918	79.2009
GOTERM_CC_DIRECT	GO:0060170~ciliary membrane	5	0.684932	0.085239	PROM2, CLTB, GPR161, BBS9, ARL6	666	29	11424	2.95744	1	0.583174	71.6548
GOTERM_BP_DIRECT	GO:0061003~positive regulation of dendritic spine morphogenesis	4	0.547945	0.0859695	XLR3B, DBN1, STAU2, KALRN	633	18	10723	3.76444	1	0.928891	80.0395
GOTERM_BP_DIRECT	GO:0035050~embryonic heart tube development	4	0.547945	0.0859695	TBX2, GJA1, FOXC1, NKX2-5	633	18	10723	3.76444	1	0.928891	80.0395
GOTERM_BP_DIRECT	GO:0030198~extracellular matrix organization	9	1.23288	0.0876859	LAMA1, SMOC2, ERO1LB, LAMB2, LGALS3, KAZALD1, PDGFRA, LAMC2, COL5A3	633	78	10723	1.95461	1	0.930855	80.7009
INTERPRO	IPR001839:Transforming growth factor-beta, C-terminal	4	0.547945	0.088674	TGFB3, GDF11, TGFB1, BMP6	694	18	11604	3.71566	1	0.880969	77.6034
INTERPRO	IPR018039:Intermediate filament protein, conserved site	4	0.547945	0.088674	KRT18, DES, KRT7, KRT8	694	18	11604	3.71566	1	0.880969	77.6034
INTERPRO	IPR027231:Semaphorin	4	0.547945	0.088674	SEMA6B, SEMA3G, SEMA4F, SEMA7A	694	18	11604	3.71566	1	0.880969	77.6034
GOTERM_CC_DIRECT	GO:0045121~membrane raft	16	2.19178	0.0887623	RTN4RL1, ADCY5, PODXL, TLR2, H2-D1, GJA1, GPRC5B, TRADD, ANXA2, STOM, EFHD2, KCNN4, PROM2, PECAM1, NOS3, LRP2	666	176	11424	1.55938	1	0.590633	73.1611
GOTERM_MF_DIRECT	GO:0030552~cAMP binding	4	0.547945	0.090561	HCN2, PDE4B, PDE4D, POPDC3	622	18	10304	3.68131	1	0.879562	76.8466
GOTERM_MF_DIRECT	GO:0050998~nitric-oxide synthase binding	4	0.547945	0.090561	ATP2B4, NOS3, CDH2, CD74	622	18	10304	3.68131	1	0.879562	76.8466
UP_SEQ_FEATURE	domain:Laminin EGF-like 7	3	0.410959	0.0907434	LAMA1, LAMB2, LAMC2	641	9	11138	5.79199	1	0.976929	80.0834
UP_SEQ_FEATURE	domain:EGF-like 14; calcium-binding	3	0.410959	0.0907434	LTBP1, LTBP4, FBN2	641	9	11138	5.79199	1	0.976929	80.0834
GOTERM_MF_DIRECT	GO:0005198~structural molecule activity	9	1.23288	0.091288	CLDN7, KRT18, DES, CLTB, CLDN4, KRT7, KRT8, DSP, COL5A3	622	77	10304	1.93628	1	0.874855	77.1302
GOTERM_BP_DIRECT	GO:0001558~regulation of cell growth	6	0.821918	0.0913812	TMC8, SGK3, KAZALD1, IGFBP2, IGFBP3, IGFBP5	633	41	10723	2.47902	1	0.936823	82.0552
UP_SEQ_FEATURE	domain:CRAL-TRIO	4	0.547945	0.0922441	TTPA, SEC14L4, ARHGAP8, KALRN	641	19	11138	3.6581	1	0.976512	80.6337
UP_SEQ_FEATURE	propeptide:Activation peptide	4	0.547945	0.0922441	CTSJ, REN1, CTSR, CTSH	641	19	11138	3.6581	1	0.976512	80.6337
GOTERM_CC_DIRECT	GO:0070382~exocytic vesicle	3	0.410959	0.092803	UNC13D, DPYSL3, RAB27A	666	9	11424	5.71772	1	0.599857	74.797
INTERPRO	IPR001452:Src homology-3 domain	16	2.19178	0.0935985	ARHGEF26, ARHGEF6, ARHGEF37, RUSC1, RIMBP2, BZRAP1, AHI1, EFS, PPP1R13L, AMPH, FCHSD2, PPP1R13B, TJP3, ARHGAP9, KALRN, NPHP1	694	173	11604	1.5464	1	0.890217	79.4759
GOTERM_BP_DIRECT	GO:0043537~negative regulation of blood vessel endothelial cell migration	3	0.410959	0.0948111	ACVRL1, THBS1, TGFB1	633	9	10723	5.64666	1	0.941713	83.2314
GOTERM_BP_DIRECT	GO:0034332~adherens junction organization	3	0.410959	0.0948111	RAB8B, DSP, CDH1	633	9	10723	5.64666	1	0.941713	83.2314
GOTERM_BP_DIRECT	GO:0007184~SMAD protein import into nucleus	3	0.410959	0.0948111	ZFYVE9, TGFB3, TGFB1	633	9	10723	5.64666	1	0.941713	83.2314
GOTERM_BP_DIRECT	GO:0006655~phosphatidylglycerol biosynthetic process	3	0.410959	0.0948111	PLD2, SLC27A1, PLD4	633	9	10723	5.64666	1	0.941713	83.2314
GOTERM_BP_DIRECT	GO:0071872~cellular response to epinephrine stimulus	3	0.410959	0.0948111	ATP2B4, PDE4B, PDE4D	633	9	10723	5.64666	1	0.941713	83.2314
GOTERM_BP_DIRECT	GO:0000904~cell morphogenesis involved in differentiation	3	0.410959	0.0948111	LAMB2, KRT8, MYH9	633	9	10723	5.64666	1	0.941713	83.2314
GOTERM_MF_DIRECT	GO:0005216~ion channel activity	8	1.09589	0.0950687	HCN2, KCNQ5, KCNS1, CHRNA4, CACNA1H, KCNH2, CACNA1C, ITPR2	622	65	10304	2.03888	1	0.879148	78.5535
UP_SEQ_FEATURE	repeat:LRR 4	11	1.50685	0.0958571	AMIGO1, LRRC8E, LRRC4, RTN4RL1, LRRN4, LRRC4B, TLR2, TPBG, LRRC49, FBXL16, LRFN3	641	109	11138	1.75354	1	0.978132	81.9005
INTERPRO	IPR027401:Myosin-like IQ motif-containing domain	3	0.410959	0.0969939	MYH14, MYH9, MYH7B	694	9	11604	5.57349	1	0.894637	80.6804
INTERPRO	IPR013099:Ion transport 2	3	0.410959	0.0969939	KCNN4, KCNK6, KCNK13	694	9	11604	5.57349	1	0.894637	80.6804
INTERPRO	IPR013201:Proteinase inhibitor I29, cathepsin propeptide	3	0.410959	0.0969939	CTSJ, CTSR, CTSH	694	9	11604	5.57349	1	0.894637	80.6804
INTERPRO	IPR025661:Cysteine peptidase, asparagine active site	3	0.410959	0.0969939	CTSJ, CTSR, CTSH	694	9	11604	5.57349	1	0.894637	80.6804
GOTERM_BP_DIRECT	GO:0048565~digestive tract development	5	0.684932	0.0973721	GATA2, ITGA6, TGFB3, KIT, TGFB1	633	30	10723	2.82333	1	0.944677	84.0618
GOTERM_BP_DIRECT	GO:0051017~actin filament bundle assembly	5	0.684932	0.0973721	SHROOM1, MYO1B, FSCN1, DPYSL3, LCP1	633	30	10723	2.82333	1	0.944677	84.0618
GOTERM_BP_DIRECT	GO:0030041~actin filament polymerization	4	0.547945	0.097813	MTSS1, GSN, MYH9, WAS	633	19	10723	3.56631	1	0.943873	84.2008
GOTERM_BP_DIRECT	GO:0032729~positive regulation of interferon-gamma production	4	0.547945	0.097813	IL12RB1, PDE4B, PDE4D, RUNX1	633	19	10723	3.56631	1	0.943873	84.2008
GOTERM_BP_DIRECT	GO:0042476~odontogenesis	4	0.547945	0.097813	PAX9, BCOR, AQP3, TWIST1	633	19	10723	3.56631	1	0.943873	84.2008
GOTERM_BP_DIRECT	GO:0030073~insulin secretion	4	0.547945	0.097813	SLC18A2, VGF, PTPRN, CACNA1C	633	19	10723	3.56631	1	0.943873	84.2008
GOTERM_BP_DIRECT	GO:0007605~sensory perception of sound	9	1.23288	0.0981255	MYO6, SLC1A3, PGAP1, ATP8B1, COL2A1, CDH1, MYH14, CDH23, MBP	633	80	10723	1.90575	1	0.942848	84.2986
GOTERM_MF_DIRECT	GO:0004438~phosphatidylinositol-3-phosphatase activity	3	0.410959	0.0985186	MTMR1, SYNJ1, FIG4	622	9	10304	5.52197	1	0.882244	79.7796
GOTERM_MF_DIRECT	GO:0005388~calcium-transporting ATPase activity	3	0.410959	0.0985186	ATP2C2, ATP2B4, ATP2A3	622	9	10304	5.52197	1	0.882244	79.7796
GOTERM_MF_DIRECT	GO:0005515~protein binding	203	27.8082	0.0987358	ADCY5, PGAM2, RORA, MXI1, ADORA1, SERPINE1, CEP290, CHRNA4, CDH23, RAB27A, LRRC4, TNIK, KIF5A, PLD4, MATN1, MYH9, RND3, ATP2C2, UNC13D, BAZ1A, KRT18, CC2D2A, PDE4DIP, LAMC2, DBN1, EIF2AK3, TDRD7, HOXB13, AFAP1L1, IGF2BP3, CD74, T, DUSP16, BCOR, TCF4, NKX2-5, NPHP1, DNMT3A, LGALS3, FBXO2, SYNGR3, LAMA1, RGS2, ATP2A3, MLYCD, PKP3, HOPX, TMEM119, BMP6, ACVRL1, TTC26, EZH1, WASF1, PPARG, SYNJ1, H2-D1…	622	3105	10304	1.08305	1	0.876537	79.8545
UP_SEQ_FEATURE	metal ion-binding site:Calcium 2	5	0.684932	0.0996123	ATP2C2, NPTX1, ATP2A3, SYT11, PON2	641	31	11138	2.80258	1	0.979712	83.1342

## Sheet: DAVID_3D
Category	Term	Count	%	PValue	Genes	List Total	Pop Hits	Pop Total	Fold Enrichment	Bonferroni	Benjamini	FDR
UP_KEYWORDS	Glycoprotein	303	0.220047	1.82729e-50	ATP1B1, LTBP1, GDF1, LYPD6, PTGS2, CADM1, LTBP3, ADCY5, EFNA2, LTBP4, FST, AQP3, SYP, APP, FAM171B, PLOD2, SEMA7A, COL12A1, CHRNA4, ADAM8, CDH23, LRRC4, MATN2, TYRO3, STC2, PTPRG, MDGA1, EFNB2, F8, BSN, COLEC12, TMEM150A, VEGFB, ADAMTS8, TACSTD2, F3, ASPHD2, VEGFA, ARXES2, ST14, TFPI, TMEM170B, EFNA5, STC1, EXT1, PMP22, ADAMTS2, GCNT2, PTH1R, ITGA11, MME, NRN1, MANSC1, CD74, SORCS2, EPHB1, EPHB2,…	903	1797	12297	2.29618	6.13969e-48	6.13969e-48	2.48397e-47
UP_SEQ_FEATURE	glycosylation site:N-linked (GlcNAc...)	265	0.19245	8.31331e-42	ATP1B1, GDF1, LTBP1, LYPD6, PTGS2, CADM1, LTBP3, ADCY5, EFNA2, LTBP4, FST, SYP, APP, FAM171B, PLOD2, SEMA7A, CHRNA4, COL12A1, ADAM8, CDH23, LRRC4, MATN2, TYRO3, STC2, PTPRG, MDGA1, EFNB2, F8, COLEC12, TMEM150A, ADAMTS8, TACSTD2, F3, ASPHD2, VEGFA, ARXES2, ST14, TFPI, TMEM170B, STC1, EFNA5, EXT1, PMP22, ADAMTS2, GCNT2, PTH1R, ITGA11, MME, MANSC1, CD74, SORCS2, EPHB1, EPHB2, ALCAM, SEMA5B, SIAE, DA…	814	1621	11138	2.2369	1.85387e-38	1.85387e-38	1.44749e-38
UP_SEQ_FEATURE	signal peptide	231	0.167758	1.77548e-41	GDF1, LTBP1, LYPD6, PTGS2, CADM1, LTBP3, EFNA2, LTBP4, FST, DNASE1L3, APP, FAM171B, PLOD2, HTRA1, SEMA7A, SBSN, CHRNA4, COL12A1, ADAM8, CDH23, LRRC4, MATN2, TYRO3, STC2, PTPRG, MDGA1, EFNB2, F8, LHFP, TMEM150A, VEGFB, ADAMTS8, TACSTD2, F3, VEGFA, TFPI, STC1, EFNA5, ADAMTS2, ACP6, PTH1R, ITGA11, MANSC1, NRN1, SORCS2, EPHB1, EPHB2, ALCAM, SEMA5B, SIAE, TCTN1, BMP2, NTF3, GAS1, MCAM, GAS6, PCDH18, F…	814	1304	11138	2.42391	3.95933e-38	1.97966e-38	3.09142e-38
UP_KEYWORDS	Signal	272	0.197534	3.31936e-40	LTBP1, GDF1, LYPD6, PTGS2, CADM1, LTBP3, EFNA2, LTBP4, FST, DNASE1L3, APP, FAM171B, PLOD2, HTRA1, SEMA7A, SBSN, CHRNA4, COL12A1, ADAM8, CDH23, LRRC4, MATN2, TYRO3, STC2, PTPRG, MDGA1, EFNB2, F8, LHFP, TMEM150A, VEGFB, ADAMTS8, TACSTD2, F3, VEGFA, TFPI, EFNA5, STC1, ADAMTS2, PTH1R, ITGA11, NRN1, MANSC1, SORCS2, EPHB1, EPHB2, ALCAM, SEMA5B, SIAE, TCTN1, BMP2, NTF3, GAS1, MCAM, GAS6, PCDH18, FAM131A…	903	1695	12297	2.1853	1.1153e-37	5.57652e-38	4.51226e-37
UP_KEYWORDS	Disulfide bond	208	0.151055	2.89524e-34	ATP1B1, GDF1, LTBP1, PTGS2, CADM1, LTBP3, EFNA2, LTBP4, FST, DNASE1L3, APP, SEMA7A, CHRNA4, COL12A1, ADAM8, MATN2, LRRC4, TYRO3, STC2, PTPRG, MDGA1, EFNB2, F8, COLEC12, VEGFB, ADAMTS8, TACSTD2, F3, VEGFA, ST14, TFPI, STC1, EFNA5, EXT1, ADAMTS2, PTH1R, ITGA11, MME, CD74, EPHB2, ALCAM, SEMA5B, SIAE, BMP2, NTF3, MCAM, GAS6, NOTCH3, SFRP5, LAMA1, SFRP1, SEMA6D, NTRK2, BMP7, BMP6, NRP2, NRP1, ACVRL1, …	903	1205	12297	2.35065	9.72802e-32	3.24267e-32	3.93572e-31
UP_SEQ_FEATURE	disulfide bond	165	0.119827	1.83839e-29	ATP1B1, MPZL2, GDF1, LTBP1, CADM1, PTGS2, LTBP3, LTBP4, EFNA2, FST, TGFB3, JAG1, DLK1, DNASE1L3, TGFB2, PRL2A1, APP, UNC5B, UNC5A, PAPPA, SEMA7A, CHRNA4, ADAM8, LRRC4, MATN2, COCH, TYRO3, SCUBE1, MDGA1, EFNB2, F8, COLEC12, MOXD1, NCAM1, VEGFB, IGSF8, ADAMTS8, LRP10, TACSTD2, F3, DLL4, ST14, IGSF3, VEGFA, TFPI, GPR50, STC1, EFNA5, ADAMTS2, KALRN, FGFR2, FGFR3, ADORA2A, PTH1R, DRD4, ITGA11, ITGB5, …	814	916	11138	2.46474	4.09961e-26	1.36654e-26	3.20095e-26
GOTERM_CC_DIRECT	GO:0005886~plasma membrane	281	0.20407	4.50493e-24	ATP1B1, CADM1, ADCY5, EFNA2, SYT8, SYT7, SGMS1, AQP3, APP, HTRA1, SEMA7A, AIF1L, CHRNA4, RAPGEF3, ADAM8, CDH23, LRRC4, TYRO3, ARC, MAGI1, CRYAB, MDGA1, EFNB2, TANC1, PIM1, ZHX2, TMEM150A, MAGEE1, TACSTD2, F3, VEGFA, RYR2, RAB15, DOC2G, EFNA5, PMP22, DBN1, GRB14, CDK5R1, GNAI1, PTH1R, ASAP1, MME, PXK, AFAP1L1, NRN1, CD74, ADA, EPHB1, EPHB2, ALCAM, CDC42EP2, SERINC5, DAGLA, RAC3, DMD, RAP1GAP2, KLF…	849	2183	11424	1.73206	2.20291e-21	2.20291e-21	6.46699e-21
GOTERM_CC_DIRECT	GO:0005576~extracellular region	120	0.0871472	1.59012e-22	FGF18, GDF1, LTBP1, LYPD6, LTBP3, LTBP4, FST, TGFB3, IL17RE, PRL2A1, TGFB2, WNT4, PAPPA, HTRA1, SBSN, COL12A1, COCH, MATN2, STC2, SCUBE1, F8, VEGFB, ADAMTS8, ST14, VEGFA, TFPI, STC1, ADAMTS2, WNT5A, FGFR2, CX3CL1, MDK, TIMP3, CCL7, TCTN1, ANGPTL2, LPL, MGAT4A, BMP2, NTF3, ADAM23, KITL, GAS6, FAM131A, SFRP5, TULP1, LAMA1, SFRP1, THSD4, FJX1, BMP7, CHRD, BMP6, ENOX2, NPNT, CLSTN1, CXADR, GPC4, WISP…	849	631	11424	2.55895	7.77569e-20	3.88784e-20	2.28268e-19
UP_KEYWORDS	Cell membrane	197	0.143067	1.53695e-20	ATP1B1, CADM1, EFNA2, ADCY5, SYT8, SYT7, HTRA1, SEMA7A, AIF1L, CHRNA4, CDH23, LRRC4, TYRO3, ARC, MAGI1, MDGA1, PIM1, TANC1, TMEM150A, MAGEE1, VEGFA, RAB15, EFNA5, PMP22, CDK5R1, GNAI1, PTH1R, MME, PXK, NRN1, EPHB1, ADA, EPHB2, ALCAM, DAGLA, SERINC5, RAC3, DMD, GAS1, PCDH18, NOTCH3, TULP1, CNIH2, SEMA6D, PKP4, NTRK2, SLC46A1, SLC27A1, ENOX2, ACVRL1, CPEB3, SUSD2, GJA1, CDCP1, KCNJ10, APCDD1, ART4,…	903	1408	12297	1.90535	5.16416e-18	1.29104e-18	2.0893e-17
GOTERM_CC_DIRECT	GO:0005615~extracellular space	112	0.0813374	1.3673e-20	GDF1, LTBP1, LTBP4, TGFB3, CNP, DLK1, TGFB2, ACTG2, WNT4, APP, PAPPA, COL12A1, COCH, STC2, PTPRG, SCUBE1, MDGA1, F8, VEGFB, CST6, TACSTD2, F3, ST14, VEGFA, TFPI, STC1, WNT5A, WDR60, CX3CL1, NRN1, TIMP3, ADA, CCL7, SIAE, TCTN1, LPL, BMP2, MCAM, KITL, GAS6, LAMA1, SFRP1, CXCL16, FJX1, BMP7, MERTK, CHRD, ENG, BMP6, NRP1, ENOX2, PRKAG2, GPC4, GPC3, SEMA3G, GPC6, GPX3, SEMA3C, LTF, SEPP1, LBP, LOXL2, …	849	596	11424	2.52861	6.68607e-18	2.22869e-18	1.9628e-17
UP_SEQ_FEATURE	topological domain:Extracellular	152	0.110386	3.25853e-21	ATP1B1, MPZL2, OCLN, CADM1, TSPAN2, PLXNA2, ADCY5, SLC6A4, TSPAN5, GRIK5, SYT8, IL17RE, JAG1, DLK1, SLC7A6, AQP3, APP, FAM171B, SLC2A5, UNC5B, UNC5A, CHRNA4, ADAM8, CDH23, LRRC4, TYRO3, RET, PTPRG, EFNB2, MRGPRE, COLEC12, TMEM150A, NCAM1, IGSF8, SLITRK4, LRP10, TACSTD2, F3, DLL4, ST14, IGSF3, GPR50, TMEM170B, FAM171A2, FGFR2, FRAS1, FGFR3, ADORA2A, PTH1R, DRD4, ITGA11, MME, ITGB5, CX3CL1, TMEM229…	814	958	11138	2.17101	7.26652e-18	1.81663e-18	5.67365e-18
UP_KEYWORDS	Secreted	108	0.0784325	5.08177e-20	FGF18, GDF1, LTBP1, LYPD6, LTBP3, LTBP4, FST, TGFB3, IL17RE, DNASE1L3, PRL2A1, TGFB2, WNT4, PAPPA, HTRA1, SBSN, COL12A1, COCH, MATN2, STC2, SCUBE1, F8, VEGFB, ADAMTS8, VEGFA, TFPI, STC1, ADAMTS2, WNT5A, CX3CL1, MDK, TIMP3, CCL7, TCTN1, ANGPTL2, LPL, MGAT4A, BMP2, NTF3, ADAM23, KITL, GAS6, FAM131A, SFRP5, TULP1, LAMA1, SFRP1, THSD4, FJX1, BMP7, CHRD, BMP6, ENOX2, NPNT, CXADR, GPC4, WISP1, GPC3, SE…	903	577	12297	2.54894	1.70748e-17	3.41495e-18	6.90804e-17
UP_SEQ_FEATURE	topological domain:Cytoplasmic	195	0.141614	4.77157e-20	KCNC1, SLC44A1, ATP1B1, MPZL2, OCLN, CADM1, TSPAN2, PLXNA2, ADCY5, TSPAN5, SLC6A4, SYT8, GRIK5, IL17RE, DLK1, SYT7, JAG1, SGMS1, AQP3, SLC7A6, SYP, APP, SLC2A5, FAM171B, UNC5B, UNC5A, B3GALNT1, NSG1, CHRNA4, ADAM8, CDH23, LRRC4, TYRO3, RET, ATG9B, PTPRG, EFNB2, MRGPRE, COLEC12, PNPLA3, TMEM150A, NCAM1, IGSF8, SLITRK4, LRP10, TACSTD2, F3, ASPHD2, DLL4, IGSF3, ST14, ARXES2, VAMP5, GPR50, TMEM170B, …	814	1417	11138	1.88299	1.06406e-16	2.12812e-17	8.30811e-17
UP_KEYWORDS	Membrane	411	0.298479	8.95021e-13	PTGS2, C130071C03RIK, SGMS1, SYP, APP, PIP5KL1, AIF1L, ADAM8, CDH23, LRRC4, TYRO3, ARC, MAGI1, PTPRG, COLEC12, LHFP, MAGEE1, F3, TMEM139, ARXES2, ST14, RYR2, PMP22, GRB14, GNAI1, PTH1R, MANSC1, SORCS2, ALCAM, CDC42EP2, DAGLA, RAC3, TCF4, LAPTM4B, TMEM120A, MGAT4A, NTF3, GAS1, SYNGR3, PCDH18, RGS5, PKP4, MARCKS, BTBD11, GNAZ, ENOX2, LTC4S, ST6GALNAC5, AP1S2, MAPT, SLC22A3, SLC22A5, GHR, CLMN, MMP1…	903	4238	12297	1.32066	3.00741e-10	5.01235e-11	1.21673e-09
GOTERM_CC_DIRECT	GO:0005578~proteinaceous extracellular matrix	41	0.0297753	3.48424e-12	ALPL, WNT5A, LTBP1, SPOCK2, LTBP3, ADAMTSL3, NPNT, TNC, LTBP4, COL3A1, TGFB3, MMP28, TIMP3, GPC4, SMOC2, WNT4, GPC3, WISP1, COL7A1, CRISPLD2, GPC6, COL6A2, ACAN, TGM2, COL6A1, ADAMTS10, COL12A1, LOXL2, MATN2, COCH, FBN1, MMP17, SLIT1, SLIT2, LAMA1, WNT7B, ADAMTS8, SFRP1, THSD4, VCAN, ADAMTS2	849	159	11424	3.46974	1.70378e-09	4.25945e-10	5.00172e-09
UP_KEYWORDS	Transmembrane helix	297	0.215689	9.3716e-12	ATP1B1, GDF1, CADM1, ADCY5, C130071C03RIK, SYT8, SYT7, SGMS1, AQP3, SYP, APP, FAM171B, CHRNA4, ADAM8, CDH23, LRRC4, TYRO3, PTPRG, EFNB2, TMEM200B, COLEC12, LHFP, TMEM150A, RND3, TACSTD2, F3, ASPHD2, TMEM139, ARXES2, ST14, TMEM170B, RYR2, EXT1, PMP22, GCNT2, PTH1R, ITGA11, SFXN3, MME, NRN1, MANSC1, TMEM229B, CD74, SORCS2, EPHB1, EPHB2, ALCAM, SEMA5B, SERINC5, DAGLA, TCF4, LAPTM4B, TMEM120A, MGAT4A…	903	2869	12297	1.40973	3.14886e-09	4.49838e-10	1.27396e-08
GOTERM_CC_DIRECT	GO:0005887~integral component of plasma membrane	77	0.0559195	6.60798e-12	ACVRL1, TSPAN2, CLDN4, CADM1, PLXNA2, GRIK3, SLC6A4, TSPAN5, KCNJ10, IL17RE, SGMS1, APCDD1, NRADD, SLC7A6, AQP3, SLC7A7, GPC3, SLC2A5, GPC6, SLC22A3, SLC22A5, ADAM8, BOC, SLC43A2, GHR, RET, MRGPRE, PCDH7, TMEM150A, CHRM4, ADRB1, TACSTD2, CD82, DLL4, ST14, VAMP5, GPR50, KCNH2, KCNH3, FGFR2, SLC39A14, FGFR3, ECEL1, ADORA2A, DRD4, PTH1R, CDH4, EPHB1, CD74, EPHB2, ALCAM, TNFRSF1A, NAGPA, SLC39A8, SLC…	849	451	11424	2.29734	3.23128e-09	6.46256e-10	9.48593e-09
UP_KEYWORDS	Transmembrane	297	0.215689	1.40425e-11	ATP1B1, GDF1, CADM1, ADCY5, C130071C03RIK, SYT8, SYT7, SGMS1, AQP3, SYP, APP, FAM171B, CHRNA4, ADAM8, CDH23, LRRC4, TYRO3, PTPRG, EFNB2, TMEM200B, COLEC12, LHFP, TMEM150A, RND3, TACSTD2, F3, ASPHD2, TMEM139, ARXES2, ST14, TMEM170B, RYR2, EXT1, PMP22, GCNT2, PTH1R, ITGA11, SFXN3, MME, NRN1, MANSC1, TMEM229B, CD74, SORCS2, EPHB1, EPHB2, ALCAM, SEMA5B, SERINC5, DAGLA, TCF4, LAPTM4B, TMEM120A, MGAT4A…	903	2878	12297	1.40533	4.71826e-09	5.89782e-10	1.9089e-08
GOTERM_CC_DIRECT	GO:0016021~integral component of membrane	301	0.218594	1.12608e-11	ATP1B1, GDF1, CADM1, ADCY5, C130071C03RIK, SYT8, SYT7, SGMS1, AQP3, SYP, APP, FAM171B, CHRNA4, ADAM8, CDH23, LRRC4, TYRO3, PTPRG, EFNB2, TMEM200B, BSN, COLEC12, LHFP, TMEM150A, RND3, TACSTD2, F3, ASPHD2, TMEM139, ARXES2, ST14, TMEM170B, RYR2, EXT1, PMP22, GCNT2, PTH1R, ITGA11, SFXN3, MME, NRN1, MANSC1, TMEM229B, CD74, SORCS2, EPHB1, EPHB2, ALCAM, SEMA5B, SERINC5, DAGLA, TCF4, LAPTM4B, TMEM120A, M…	849	2900	11424	1.39662	5.50657e-09	9.17762e-10	1.61654e-08
UP_KEYWORDS	Cell adhesion	48	0.0348589	1.97746e-11	ATP1B1, MPZL2, CADM1, NPNT, TNC, CLSTN1, ITGA11, CTNND2, ITGB5, CDH2, CX3CL1, CXADR, CDH4, EPHB1, DCHS1, ADA, ALCAM, APP, WISP1, COL7A1, FAT3, COL6A2, PSTPIP1, CNTNAP2, COL6A1, COL12A1, THBS1, BOC, CDH23, FLRT3, TYRO3, FLRT1, RET, SVEP1, ADAM23, ITGA4, PCDH7, MCAM, PRKCE, KITL, PCDH18, NCAM1, LAMA1, TMEM8B, PKP4, CNTN2, ENG, AOC3	903	221	12297	2.95774	6.64427e-09	7.38253e-10	2.68812e-08
GOTERM_CC_DIRECT	GO:0009986~cell surface	67	0.0486572	1.71339e-11	KCNC1, NRP1, OCLN, ACVRL1, CLSTN1, TGFB3, CXCR2, CXADR, SDC2, TGFB2, APP, WNT4, CNTNAP2, LTF, LBP, ADAM8, BOC, GHR, COL23A1, CRYAB, SCUBE1, BSN, PKD2L1, NCAM1, F3, IGSF3, VEGFA, CNTN2, VAMP5, TFPI, VCAN, KCNH2, AOC3, FGFR2, WNT5A, FGFR3, RTN4RL1, ITGB5, CX3CL1, GPRC5B, CD74, ADA, TNFRSF1A, ECE1, DMD, SLCO3A1, PCSK6, THBS1, FGFBP1, CSF1R, LPL, BMP2, MRC2, RTN4R, TSPAN15, ITGA4, FZD5, TPBG, WNT7B, …	849	372	11424	2.4235	8.37851e-09	1.19693e-09	2.45964e-08
UP_SEQ_FEATURE	transmembrane region	257	0.18664	5.31653e-12	ATP1B1, GDF1, CADM1, ADCY5, SYT8, SGMS1, SYT7, AQP3, SYP, APP, FAM171B, CHRNA4, ADAM8, CDH23, LRRC4, TYRO3, PTPRG, EFNB2, COLEC12, LHFP, TMEM150A, TACSTD2, F3, ASPHD2, ARXES2, ST14, TMEM170B, EXT1, PMP22, GCNT2, PTH1R, ITGA11, SFXN3, MME, MANSC1, TMEM229B, CD74, SORCS2, EPHB1, EPHB2, ALCAM, SEMA5B, DAGLA, SERINC5, TMEM120A, LAPTM4B, MGAT4A, MCAM, SYNGR3, PCDH18, NOTCH3, CNIH2, SEMA6D, NTRK2, ENG,…	814	2404	11138	1.46279	1.18559e-08	1.97598e-09	9.25697e-09
GOTERM_BP_DIRECT	GO:0007411~axon guidance	32	0.0232393	2.24139e-11	NRP2, WNT5A, CDK5R1, NRP1, EFNA2, PAX6, GLI2, CDH4, EPHB1, EPHB2, TGFB2, ALCAM, UNC5B, UNC5A, SEMA3C, BOC, CSF1R, FLRT3, MATN2, NTF3, EFNB2, ARTN, GAS1, SLIT1, SLIT2, NCAM1, LAMA1, CNTN2, EFNA5, EXT1, BMP7, KIF26B	794	108	10723	4.00149	7.96816e-08	7.96816e-08	4.1123e-08
GOTERM_MF_DIRECT	GO:0005509~calcium ion binding	62	0.0450261	1.07651e-10	LTBP1, LTBP3, LTBP4, NPNT, CLSTN1, SYT8, NCS1, JAG1, SYT7, MMP28, DLK1, AIF1L, ADAM8, PLS3, CDH23, MATN2, RET, SCUBE1, MMP17, PCDH7, SLIT1, SLIT2, PKD2L1, RAB11FIP4, DLL4, RYR2, DOC2G, VCAN, AOC3, NKD1, CDK5R1, NKD2, SPOCK2, CDH2, NECAB3, CDH4, DCHS1, GCH1, MYL9, ANXA6, SMOC2, ANXA8, PRRG4, FAT3, PRRG1, RASGRP2, TGM2, ACAN, THBS1, EHD2, TESC, SVEP1, FBN1, GAS6, PCDH18, NOTCH3, CBLC, PLA2G4A, SULF…	761	347	10304	2.41926	1.01838e-07	1.01838e-07	1.68882e-07
UP_KEYWORDS	GPI-anchor	22	0.015977	1.21042e-09	ALPL, LPL, RTN4RL1, EFNA2, MDGA1, RTN4R, MMP17, CNTFR, GAS1, NRN1, LYPD6B, ART4, LY6A, NCAM1, GPC4, GPC3, LY6E, GPC6, SEMA7A, CNTN2, EFNA5, GFRA2	903	62	12297	4.83217	4.06702e-07	4.06703e-08	1.64542e-06
GOTERM_CC_DIRECT	GO:0031225~anchored component of membrane	22	0.015977	2.07334e-09	ALPL, LPL, RTN4RL1, EFNA2, MDGA1, RTN4R, MMP17, CNTFR, GAS1, NRN1, LYPD6B, ART4, LY6A, NCAM1, GPC4, GPC3, LY6E, GPC6, SEMA7A, CNTN2, EFNA5, GFRA2	849	63	11424	4.69886	1.01386e-06	1.26733e-07	2.97636e-06
INTERPRO	IPR013783:Immunoglobulin-like fold	55	0.0399425	1.57346e-09	MPZL2, CADM1, PLXNA2, CXADR, UNC5B, SEMA3G, UNC5A, SEMA7A, SEMA3C, COL12A1, BOC, CSF2RA, GHR, ATF7IP, VSIG10, LRRC4, TYRO3, PTPRG, MDGA1, NEXN, FLNA, SIGIRR, NCAM1, IGSF8, TRIM36, F3, IGSF3, CNTN2, VCAN, KALRN, FGFR2, FGFR3, ADAMTSL3, TNC, CNTFR, EPHB1, EPHB2, ALCAM, FNDC4, LINGO3, COL7A1, FNDC1, TGM1, TGM2, ACAN, MFAP3L, CSF1R, FLRT1, LRRN4, IGLON5, LRRN2, MCAM, MID2, NTRK2, MERTK	874	302	11604	2.41798	2.09742e-06	2.09742e-06	2.57702e-06
UP_KEYWORDS	Calcium	65	0.0472048	9.49244e-09	NRP2, NRP1, NPNT, CLSTN1, NCS1, SYT7, JAG1, MMP28, DNASE1L3, SYP, AIF1L, PLS3, CDH23, SCUBE1, F8, MMP17, PRKCG, COLEC12, FIBCD1, PCDH7, PKD2L1, RAB11FIP4, RYR2, VCAN, AOC3, CAMK1D, FRAS1, NKD1, NKD2, SPOCK2, COL3A1, ITGA11, CDH2, NECAB3, CDH4, DCHS1, MYL9, ANXA6, SMOC2, ANXA8, NPTX1, DAGLA, FAT3, DMD, RASGRP2, TGM1, AVIL, TGM2, ACAN, THBS1, EHD2, CACNA2D1, TESC, SVEP1, SYT11, FBN1, MRC2, ITGA4, G…	903	416	12297	2.1278	3.18946e-06	2.89951e-07	1.29038e-05
GOTERM_MF_DIRECT	GO:0008201~heparin binding	24	0.0174294	4.61741e-09	FGFR2, NRP2, LPL, COL23A1, NRP1, FBN1, SLIT1, MDK, CCL7, SLIT2, VEGFB, NCAM1, SMOC2, APP, ADAMTS8, WISP1, SFRP1, CRISPLD2, VEGFA, LTF, THBS1, BMP7, PCSK6, CHRD	761	78	10304	4.16618	4.36806e-06	2.18403e-06	7.24375e-06
GOTERM_BP_DIRECT	GO:0007155~cell adhesion	51	0.0370376	1.47425e-09	ATP1B1, MPZL2, CADM1, NPNT, CLSTN1, CXADR, APP, WISP1, CNTNAP2, COL12A1, BOC, CDH23, TYRO3, RET, EFNB2, PRKCE, HES1, NCAM1, CNTN2, VCAN, AOC3, TNC, ITGA11, CTNND2, ITGB5, CDH2, CX3CL1, CDH4, DCHS1, ADA, EPHB1, ALCAM, FAT3, COL7A1, PSTPIP1, ACAN, COL6A2, COL6A1, THBS1, FLRT3, FLRT1, SVEP1, ADAM23, ITGA4, MCAM, KITL, PCDH18, LAMA1, TMEM8B, PKP4, ENG	794	273	10723	2.52292	5.24094e-06	2.62047e-06	2.70481e-06
GOTERM_CC_DIRECT	GO:0045202~synapse	53	0.03849	2.31708e-08	CADM1, CPEB3, GRIK3, CLSTN1, GRIK5, NCS1, SYT8, CASK, SYT7, SYNGR1, SDC2, SYP, CHRNA4, NEURL1A, CDH23, LRRC4, ARC, CTBP2, MYO6, CRYAB, PSD3, TANC1, BSN, PRKCG, NCK2, IGSF8, CHRM4, SH3KBP1, CNTN2, DOC2G, MME, CDH2, BRSK1, NRN1, AMPH, EPHB2, RIMS3, PRR7, TNFRSF1A, DMD, RASGRP2, SYNPO, HCN2, PHACTR1, ICA1, SYT11, ATP1A3, SHANK2, SYNGR3, TULP1, SLC17A5, CNIH2, SYT13	849	312	11424	2.28577	1.13304e-05	1.25894e-06	3.32625e-05
INTERPRO	IPR009030:Insulin-like growth factor binding protein, N-terminal	24	0.0174294	3.26644e-08	FRAS1, MATN2, SVEP1, LTBP1, LTBP3, LTBP4, SCUBE1, NPNT, FBN1, JAG1, SLIT2, EPHB1, GAS6, EPHB2, NOTCH3, WISP1, HTRA1, DLL4, IGFBP2, PCSK6, IGFBP3, PCSK5, CRIM1, IGFBP5	874	84	11604	3.7934	4.35407e-05	2.17706e-05	5.3498e-05
GOTERM_CC_DIRECT	GO:0031012~extracellular matrix	37	0.0268704	1.61144e-07	FGFR2, FRAS1, LTBP1, LTBP3, NPNT, TNC, LTBP4, COL3A1, TGFB3, TIMP3, TGFB2, HTRA1, SBSN, TGM2, COL6A2, ADAMTS10, COL12A1, COL6A1, THBS1, LOXL2, PCSK6, MATN2, COCH, LPL, FBN1, MMP17, FLNA, LAMA1, ADAMTS8, SFRP1, F3, THSD4, DSP, VCAN, TGFB1I1, BMP7, ADAMTS2	849	191	11424	2.60663	7.87963e-05	7.87991e-06	0.000231328
UP_KEYWORDS	Lipoprotein	67	0.0486572	2.76305e-07	GNAZ, APOBEC3, SLC44A1, EFNA2, UCHL1, NCS1, RHOQ, CNP, SYT7, CXADR, GPC4, ART4, EDNRB, WNT4, GPC3, UNC5B, SEMA7A, GPC6, CHRNA4, RAB6B, ERAS, NEURL1A, RHOF, MDGA1, MMP17, BSN, ALDH3B2, LDLRAD3, LYPD6B, ZDHHC15, NCAM1, RND3, IGSF8, ADRB1, LRP10, F3, CNTN2, PCMTD1, RAB15, DSP, EFNA5, RASD1, ALPL, WNT5A, CDK5R1, NKD1, NKD2, RTN4RL1, GNAI1, PHKA1, MME, CNTFR, NRN1, LY6A, GLIPR2, RGS10, PPP1R16B, LY6E,…	903	474	12297	1.9249	9.2834e-05	7.7365e-06	0.000375601
INTERPRO	IPR000742:Epidermal growth factor-like domain	29	0.0210606	1.04076e-07	FRAS1, LTBP1, PTGS2, LTBP3, LTBP4, TNC, NPNT, JAG1, DLK1, FAT3, ACAN, CNTNAP2, THBS1, PCSK6, ADAM8, PCSK5, MATN2, SVEP1, ADAM23, SCUBE1, FBN1, SLIT1, GAS6, SLIT2, NOTCH3, LAMA1, DLL4, VCAN, ADAM22	874	124	11604	3.10508	0.000138724	4.62433e-05	0.000170456
UP_KEYWORDS	Cell junction	62	0.0450261	4.82011e-07	OCLN, CLDN4, CADM1, CLDN3, CPEB3, GRIK3, CLSTN1, GRIK5, NCS1, GJA1, SYT7, CXADR, SYNGR1, SYP, WNK4, STARD8, CHRNA4, NEURL1A, LRRC4, ARC, CTBP2, MAGI1, ARHGEF5, TANC1, PSD3, BSN, PRKCG, NEXN, TNS4, CHRM4, SH3KBP1, DSP, TGFB1I1, DBN1, LIMS2, CTNND2, BRSK1, AFAP1L1, NRN1, ADA, GJC1, AMPH, RIMS3, PRR7, DMD, RASGRP2, SYNPO, NOX4, FLRT3, PHACTR1, ICA1, FLRT1, SYT11, SHANK2, CLDN23, SYNGR3, GJB2, TULP1,…	903	432	12297	1.95443	0.000161943	1.24581e-05	0.000655232
UP_KEYWORDS	Immunoglobulin domain	34	0.0246917	5.31588e-07	FGFR2, MPZL2, FGFR3, CADM1, CNTFR, CXADR, ALCAM, LINGO3, UNC5B, SEMA3G, UNC5A, SEMA7A, ACAN, SEMA3C, MFAP3L, BOC, CSF1R, LRRC4, VSIG10, TYRO3, IGLON5, MDGA1, LRRN2, NEXN, MCAM, SIGIRR, NCAM1, IGSF8, IGSF3, NTRK2, CNTN2, VCAN, MERTK, KALRN	903	177	12297	2.61588	0.000178598	1.2758e-05	0.000722626
UP_KEYWORDS	EGF-like domain	26	0.0188819	7.98601e-07	MATN2, LTBP1, SVEP1, LTBP3, ADAM23, SCUBE1, NPNT, TNC, LTBP4, FBN1, DLK1, JAG1, SLIT1, SLIT2, GAS6, NOTCH3, NAGPA, FAT3, TMEM8B, DLL4, ACAN, CNTNAP2, VCAN, ADAM22, THBS1, ADAM8	903	116	12297	3.0523	0.000268294	1.78885e-05	0.00108559
GOTERM_CC_DIRECT	GO:0016020~membrane	414	0.300658	6.34993e-07	PTGS2, SGMS1, SYP, APP, PIP5KL1, AIF1L, ADAM8, CDH23, LRRC4, TYRO3, ARC, MAGI1, PTPRG, COLEC12, LHFP, MAGEE1, F3, ST14, RYR2, DOC2G, PMP22, GRB14, GNAI1, PTH1R, MANSC1, SORCS2, ALCAM, CDC42EP2, DAGLA, RAC3, LAPTM4B, TMEM120A, MGAT4A, GAS1, SYNGR3, PCDH18, RGS5, PKP4, MARCKS, BTBD11, GNAZ, ENOX2, LTC4S, ST6GALNAC5, AP1S2, MAPT, SLC22A3, SLC22A5, GHR, CLMN, MMP17, FLNA, CCND1, CLIC5, CYBRD1, VCAN, …	849	4653	11424	1.19723	0.000310464	2.82279e-05	0.000911552
INTERPRO	IPR013032:EGF-like, conserved site	26	0.0188819	2.49243e-07	MATN2, LTBP1, SVEP1, LTBP3, ADAM23, SCUBE1, LTBP4, NPNT, TNC, FBN1, DLK1, JAG1, SLIT1, SLIT2, GAS6, NOTCH3, LAMA1, NAGPA, FAT3, TMEM8B, DLL4, ACAN, VCAN, ADAM22, THBS1, ADAM8	874	107	11604	3.22616	0.000332186	8.30568e-05	0.000408212
INTERPRO	IPR003599:Immunoglobulin subtype	32	0.0232393	4.02975e-07	FGFR2, MPZL2, FGFR3, CADM1, ADAMTSL3, CNTFR, CXADR, ALCAM, LINGO3, UNC5B, UNC5A, ACAN, SEMA3C, MFAP3L, BOC, CSF1R, LRRC4, VSIG10, TYRO3, IGLON5, MDGA1, LRRN2, NEXN, MCAM, NCAM1, IGSF8, IGSF3, NTRK2, CNTN2, VCAN, MERTK, KALRN	874	155	11604	2.74103	0.000537022	0.000107427	0.000659994
UP_KEYWORDS	Synapse	36	0.0261442	2.08393e-06	CADM1, CPEB3, GRIK3, CLSTN1, GRIK5, NCS1, BRSK1, SYT7, NRN1, SYNGR1, RIMS3, AMPH, SYP, PRR7, DMD, RASGRP2, CHRNA4, NEURL1A, SYNPO, LRRC4, PHACTR1, ICA1, ARC, CTBP2, SYT11, TANC1, PSD3, BSN, PRKCG, SHANK2, SYNGR3, TULP1, SLC17A5, CHRM4, CNIH2, SH3KBP1	903	205	12297	2.39144	0.000699955	4.37615e-05	0.0028328
GOTERM_CC_DIRECT	GO:0030424~axon	42	0.0305015	1.54148e-06	NRP2, CDK5R1, NRP1, CADM1, RAP1GAP, ADORA2A, GRIK3, ALDOC, UCHL1, DRD4, GRIK5, NCS1, KATNB1, MME, EPHB1, TGFB2, EPHB2, ALCAM, TNFRSF1A, APP, MAPT, AP3B2, AVIL, HCN4, NEFL, BOC, CAR2, KIF13B, SYNPO, HCN2, RET, MYO6, CRYAB, SYT11, ATP1A3, BSN, NCAM1, KIF1A, IGSF8, NTRK2, CNTN2, ADAM22	849	253	11424	2.23377	0.000753502	6.28136e-05	0.00221283
UP_SEQ_FEATURE	propeptide:Removed in mature form	28	0.0203344	4.09886e-07	ALPL, RTN4RL1, EFNA2, RHOQ, CNTFR, NRN1, LY6A, GPC4, ACTG2, GPC3, LY6E, RAC3, GPC6, SEMA7A, ERAS, RHOF, ACTA1, ACTA2, MDGA1, RTN4R, MMP17, GAS1, LYPD6B, RND3, CNTN2, EFNA5, RASD1, GFRA2	814	128	11138	2.99317	0.000913628	0.000130569	0.000713678
INTERPRO	IPR007110:Immunoglobulin-like domain	35	0.0254179	8.97484e-07	FGFR2, MPZL2, FGFR3, CADM1, ADAMTSL3, CNTFR, CXADR, ALCAM, LINGO3, UNC5B, SEMA3G, UNC5A, SEMA7A, ACAN, SEMA3C, MFAP3L, BOC, CSF1R, VSIG10, LRRC4, TYRO3, IGLON5, LRRN2, MDGA1, NEXN, MCAM, SIGIRR, NCAM1, IGSF8, IGSF3, NTRK2, CNTN2, VCAN, MERTK, KALRN	874	185	11604	2.51184	0.00119563	0.000199371	0.0014699
INTERPRO	IPR013098:Immunoglobulin I-set	21	0.0152508	1.01579e-06	FGFR2, LRRC4, VSIG10, TYRO3, FGFR3, CADM1, ADAMTSL3, LRRN2, MCAM, NEXN, CXADR, NCAM1, LINGO3, UNC5B, UNC5A, NTRK2, CNTN2, SEMA3C, MFAP3L, BOC, KALRN	874	79	11604	3.5293	0.00135314	0.000193418	0.00166366
SMART	SM00409:IG	32	0.0232393	6.90139e-06	FGFR2, MPZL2, FGFR3, CADM1, ADAMTSL3, CNTFR, CXADR, ALCAM, LINGO3, UNC5B, UNC5A, ACAN, SEMA3C, MFAP3L, BOC, CSF1R, LRRC4, VSIG10, TYRO3, IGLON5, MDGA1, LRRN2, NEXN, MCAM, NCAM1, IGSF8, IGSF3, NTRK2, CNTN2, VCAN, MERTK, KALRN	549	155	6322	2.37739	0.00201318	0.00201318	0.00918393
UP_KEYWORDS	Growth factor binding	8	0.00580982	6.37548e-06	LTBP1, HTRA1, LTBP3, LTBP4, IGFBP2, IGFBP3, FGFBP1, IGFBP5	903	12	12297	9.07863	0.00213987	0.000126002	0.00866632
SMART	SM00181:EGF	25	0.0181557	8.60111e-06	MATN2, FRAS1, LTBP1, SVEP1, LTBP3, SCUBE1, NPNT, TNC, LTBP4, FBN1, DLK1, JAG1, SLIT1, SLIT2, GAS6, NOTCH3, LAMA1, FAT3, DLL4, ACAN, CNTNAP2, VCAN, THBS1, PCSK6, PCSK5	549	106	6322	2.71592	0.00250838	0.00125498	0.0114457
INTERPRO	IPR000152:EGF-type aspartate/asparagine hydroxylation site	18	0.0130721	2.52739e-06	MATN2, SVEP1, LTBP1, LTBP3, LTBP4, SCUBE1, NPNT, FBN1, JAG1, DLK1, SLIT1, GAS6, SLIT2, NOTCH3, FAT3, DLL4, ACAN, VCAN	874	63	11604	3.7934	0.00336334	0.000421038	0.00413929
GOTERM_BP_DIRECT	GO:0008285~negative regulation of cell proliferation	45	0.0326802	1.09605e-06	FGFR2, FGFR3, ACVRL1, PTGS2, ADORA2A, PTH1R, PPARG, TGFB3, PAX6, GJA1, SOX4, WT1, H19, KANK2, TGFB2, GATA1, GPC3, OVOL2, PTGES, BCL2, BCL11B, BCL6, NEURL1A, CSF1R, NOX4, CEBPA, TESC, BMP2, CLMN, PTPN14, SMAD3, SKI, FZD5, SLIT2, SFRP5, SFRP1, BTG2, IRF6, DLL4, LDOC1, PMP22, BMP7, IGFBP3, KLF4, NFIB	794	278	10723	2.18607	0.00388889	0.00129798	0.00201092
UP_KEYWORDS	Extracellular matrix	24	0.0174294	1.29501e-05	WNT5A, SPOCK2, LTBP4, TNC, NPNT, COL3A1, FBN1, MMP17, TIMP3, LAMA1, SMOC2, WNT4, WNT7B, ADAMTS8, COL7A1, THSD4, ACAN, COL6A2, COL12A1, ADAMTS10, COL6A1, VCAN, LOXL2, ADAMTS2	903	118	12297	2.76975	0.00434179	0.000241707	0.0176026
UP_KEYWORDS	Developmental protein	77	0.0559195	1.67426e-05	NRP2, CDX1, NRP1, CADM1, NPNT, DYNC2LI1, PAX6, JAG1, GLI2, DAB2, WNT4, LBH, UNC5B, UNC5A, SEMA7A, SEMA3C, DND1, SCX, SPATA24, ARC, MDGA1, SOX11, EFNB2, EMX2, SIX2, SLIT1, SLIT2, ASCL2, VEGFB, DLL4, VEGFA, VAMP5, RYR2, EFNA5, GADD45B, DBN1, TNFAIP2, KIF26B, WNT5A, NKD1, TDRD7, FHL1, CTNND2, MDK, MEIS1, HIC1, EPHB2, SEMA5B, OVOL2, FAT3, NRARP, TCTN1, TCF4, MN1, FLRT3, CEBPA, BMP2, FLRT1, NES, FZD5,…	903	640	12297	1.63841	0.00560975	0.000296038	0.022757
KEGG_PATHWAY	mmu04360:Axon guidance	23	0.0167032	2.59104e-05	LRRC4, NRP1, GNAI1, PLXNA2, EFNA2, EFNB2, SLIT1, EPHB1, SLIT2, EPHB2, PAK6, NCK2, SEMA5B, UNC5B, SEMA6D, UNC5A, SEMA3G, RAC3, NCK1, SEMA7A, SEMA3C, EFNA5, PPP3CA	350	109	4454	2.68524	0.00625078	0.00625078	0.0334826
GOTERM_CC_DIRECT	GO:0030054~cell junction	63	0.0457523	1.40872e-05	OCLN, CLDN4, CADM1, CLDN3, GRIK3, CLSTN1, GRIK5, NCS1, GJA1, SYT7, CXADR, SYNGR1, SYP, WNK4, STARD8, SMAGP, CHRNA4, NEURL1A, LRRC4, ARC, CTBP2, MAGI1, ARHGEF5, TANC1, PSD3, BSN, PRKCG, NEXN, LDLRAD3, TNS4, CHRM4, SH3KBP1, DSP, TGFB1I1, DBN1, LIMS2, CTNND2, BRSK1, AFAP1L1, NRN1, ADA, GJC1, AMPH, RIMS3, PRR7, DMD, RASGRP2, SYNPO, NOX4, FLRT3, PHACTR1, ICA1, FLRT1, SYT11, SHANK2, SYNGR3, CLDN23, GJB…	849	484	11424	1.75148	0.00686501	0.000529758	0.0202208
UP_SEQ_FEATURE	domain:EGF-like 3	14	0.0101672	3.91889e-06	MATN2, LTBP3, LTBP4, NPNT, TNC, FBN1, JAG1, DLK1, SLIT1, SLIT2, NOTCH3, FAT3, DLL4, THBS1	814	41	11138	4.67226	0.00870106	0.0010918	0.00682323
INTERPRO	IPR003961:Fibronectin, type III	25	0.0181557	8.10583e-06	FLRT3, ATF7IP, TYRO3, FLRT1, LRRN4, PTPRG, TNC, MDGA1, CNTFR, EPHB1, EPHB2, MID2, NCAM1, FNDC4, TRIM36, COL7A1, F3, FNDC1, CNTN2, COL12A1, MERTK, BOC, CSF2RA, KALRN, GHR	874	120	11604	2.76602	0.010747	0.00119985	0.013275
UP_KEYWORDS	Differentiation	54	0.0392163	3.53082e-05	NRP2, NRP1, CADM1, MYO7B, NPNT, PAX6, SDC2, DAB2, SEMA7A, SEMA3C, SPATA24, SRPK2, CTBP2, MDGA1, SOX11, EFNB2, SLIT1, SLIT2, ASCL2, VEGFB, PRKD1, DLL4, VEGFA, VAMP5, EFNA5, TGFB1I1, GADD45B, DBN1, TNFAIP2, WNT5A, EID1, NKD1, TDRD7, FHL1, MDK, SEMA5B, TDRKH, TCF4, CREBL2, TESC, BMP2, FZD5, NOTCH3, SFRP5, SFRP1, SEMA6D, NXN, IRF6, NTRK2, MYCBPAP, PBX1, BMP7, CEND1, BMP6	903	410	12297	1.79358	0.0117937	0.000593013	0.0479865
INTERPRO	IPR001881:EGF-like calcium-binding	19	0.0137983	9.66738e-06	MATN2, SVEP1, LTBP1, LTBP3, LTBP4, SCUBE1, NPNT, FBN1, JAG1, DLK1, SLIT1, GAS6, SLIT2, NOTCH3, FAT3, DLL4, ACAN, VCAN, THBS1	874	76	11604	3.31922	0.012804	0.00128784	0.0158321
UP_KEYWORDS	Heparin-binding	13	0.00944095	4.12028e-05	FGFR2, VEGFB, NCAM1, NRP2, LPL, APP, ADAMTS8, NRP1, VEGFA, THBS1, MDK, CCL7, SLIT2	903	43	12297	4.11705	0.013749	0.000659042	0.0559956
SMART	SM00179:EGF_CA	19	0.0137983	6.11274e-05	MATN2, SVEP1, LTBP1, LTBP3, LTBP4, SCUBE1, NPNT, FBN1, JAG1, DLK1, SLIT1, GAS6, SLIT2, NOTCH3, FAT3, DLL4, ACAN, VCAN, THBS1	549	76	6322	2.87887	0.0176914	0.00593225	0.0813174
INTERPRO	IPR003598:Immunoglobulin subtype 2	23	0.0167032	1.64585e-05	FGFR2, LRRC4, VSIG10, TYRO3, FGFR3, CADM1, IGLON5, ADAMTSL3, MDGA1, LRRN2, CNTFR, MCAM, CXADR, NCAM1, LINGO3, UNC5B, NTRK2, CNTN2, SEMA3C, MFAP3L, BOC, CSF1R, KALRN	874	109	11604	2.80155	0.0217005	0.0019925	0.0269525
GOTERM_CC_DIRECT	GO:0060076~excitatory synapse	9	0.00653604	5.02015e-05	FGFR2, LRRC4, SYP, ELFN1, SYT11, PDE4B, NTRK2, BSN, DBN1	849	20	11424	6.05512	0.0242503	0.00175198	0.072042
GOTERM_CC_DIRECT	GO:0005902~microvillus	14	0.0101672	5.09011e-05	CTSL, PROM2, MYO6, MYO7B, PLEKHG6, MYO1G, KCNJ10, GAMT, STARD10, CNP, RAPGEF3, CAR2, AOC3, KIF13B	849	50	11424	3.76763	0.024584	0.00165804	0.0730455
UP_SEQ_FEATURE	short sequence motif:Cell attachment site	14	0.0101672	1.23505e-05	TGFB3, LAMA1, COL7A1, SEMA7A, CNTN2, ACAN, COL6A2, COL6A1, COL12A1, IGFBP2, THBS1, PCSK5, ADAMTS2, CRIM1	814	45	11138	4.25695	0.027166	0.00305553	0.0215022
UP_SEQ_FEATURE	lipid moiety-binding region:GPI-anchor amidated serine	11	0.0079885	1.58702e-05	GPC4, LYPD6B, RTN4RL1, GPC6, MDGA1, RTN4R, CNTN2, MMP17, CNTFR, GAS1, GFRA2	814	28	11138	5.37548	0.0347718	0.00353282	0.0276291
UP_KEYWORDS	Receptor	60	0.0435736	0.00010812	NRP2, NRP1, ACVRL1, GRIK3, PPARG, SUSD2, GRIK5, PTPN21, CXCR2, IL17RE, RORA, CXADR, EDNRB, UNC5B, UNC5A, CHRNA4, CSF2RA, GHR, TYRO3, RET, MRGPRE, COLEC12, LDLRAD3, IRS1, PPARGC1B, SIGIRR, CHRM4, ADRB1, LRP10, RYR2, GPR50, GRB14, FGFR2, FGFR3, RTN4RL1, ADORA2A, DRD4, PTH1R, ITGA11, ITGB5, CNTFR, GPRC5B, SORCS2, EPHB1, EPHB2, TNFRSF1A, TNFRSF19, CSF1R, MRC2, RTN4R, NPR3, ITGA4, REEP2, FZD5, NOTCH3,…	903	491	12297	1.66411	0.0356783	0.00165002	0.146876
SMART	SM00408:IGc2	23	0.0167032	0.000129622	FGFR2, LRRC4, VSIG10, TYRO3, FGFR3, CADM1, IGLON5, ADAMTSL3, MDGA1, LRRN2, CNTFR, MCAM, CXADR, NCAM1, LINGO3, UNC5B, NTRK2, CNTN2, SEMA3C, MFAP3L, BOC, CSF1R, KALRN	549	109	6322	2.42987	0.0371445	0.00941835	0.172362
UP_SEQ_FEATURE	domain:EGF-like 4; calcium-binding	10	0.00726227	1.80721e-05	NOTCH3, LTBP1, SVEP1, FAT3, LTBP3, LTBP4, NPNT, FBN1, JAG1, GAS6	814	23	11138	5.94915	0.0394998	0.00365703	0.0314619
GOTERM_MF_DIRECT	GO:0019838~growth factor binding	11	0.0079885	6.49989e-05	LTBP1, NKD2, NRP1, HTRA1, LTBP3, LTBP4, VEGFA, IGFBP2, IGFBP3, FGFBP1, IGFBP5	761	32	10304	4.6544	0.0596385	0.0202883	0.101921
GOTERM_BP_DIRECT	GO:0051965~positive regulation of synapse assembly	12	0.00871472	1.9894e-05	FLRT3, SLITRK4, FLRT1, BHLHB9, XLR3B, NTRK2, CLSTN1, UBE2V2, EFNA5, TPBG, EPHB1, EPHB2	794	34	10723	4.76648	0.068281	0.0175256	0.0364934
KEGG_PATHWAY	mmu04514:Cell adhesion molecules (CAMs)	15	0.0108934	0.000325799	LRRC4, OCLN, CADM1, CLDN4, CLDN3, CDH2, ITGA4, CDH4, CLDN23, SDC2, NCAM1, ALCAM, CNTN2, CNTNAP2, VCAN	350	64	4454	2.98259	0.0758272	0.0386609	0.420261
UP_KEYWORDS	Growth factor	13	0.00944095	0.000247196	VEGFB, FGF18, BMP2, GDF1, NTF3, VEGFA, TGFB3, ARTN, BMP7, MDK, KITL, TGFB2, BMP6	903	51	12297	3.47124	0.0797115	0.00360514	0.33551
GOTERM_BP_DIRECT	GO:0007399~nervous system development	40	0.0290491	2.33753e-05	NRP2, FGF18, FUT9, NRP1, BRSK1, NRN1, SDC2, EPHB1, EPHB2, SEMA5B, APP, SEMA7A, AVIL, SEMA3C, TCF4, NES, RET, BEND6, NTF3, SOX11, MDGA1, EFNB2, DPYSL3, MBNL1, SLIT1, SLIT2, PCDH18, PRKD1, ASCL2, SEMA6D, DLL4, NTRK2, VEGFA, EFNA5, C77370, DBN1, IFT88, GFRA2, KALRN, CAMK1D	794	264	10723	2.04622	0.0797409	0.0164827	0.042878
GOTERM_CC_DIRECT	GO:0043025~neuronal cell body	46	0.0334064	0.000171455	KCNC1, CDK5R1, NRP1, LTBP1, ACVRL1, RAP1GAP, ADORA2A, UCHL1, DRD4, GRIK5, KATNB1, TGFB3, SYT7, ADA, SDC2, TGFB2, EPHB2, ALCAM, RGS10, RAC3, CHRNA4, RAPGEF3, HCN4, ACSL4, NQO1, BOC, TUBB4A, GHR, HCN2, RET, MYO6, RTN4R, TANC1, BSN, SHANK2, FLNA, NCAM1, CYBA, KIF1A, CHRM4, PLK3, ULK1, NTRK2, CNTN2, DBN1, KALRN	849	348	11424	1.77864	0.0804296	0.00522683	0.245848
GOTERM_BP_DIRECT	GO:0001755~neural crest cell migration	13	0.00944095	2.62223e-05	NRP2, EDNRB, SEMA5B, RET, SEMA6D, OVOL2, SEMA3G, SEMA7A, PAX6, SEMA3C, ZEB2, KITL, SOX8	794	41	10723	4.28209	0.0890083	0.0154168	0.0480993
UP_SEQ_FEATURE	domain:EGF-like 1	16	0.0116196	4.23428e-05	MATN2, LTBP1, SVEP1, LTBP3, LTBP4, NPNT, FBN1, DLK1, SLIT1, SLIT2, NOTCH3, FAT3, DLL4, CNTNAP2, VCAN, THBS1	814	64	11138	3.42076	0.0901053	0.00783799	0.0737004
SMART	SM00209:TSP1	11	0.0079885	0.000325849	SEMA5B, ADAMTS8, WISP1, UNC5B, UNC5A, ADAMTSL3, THSD4, ADAMTS10, THBS1, ADAMTS2, ISM2	549	33	6322	3.83849	0.0907757	0.0188527	0.432769
UP_KEYWORDS	Proteoglycan	9	0.00653604	0.000284884	GPC4, GPC3, NRP1, SPOCK2, GPC6, ACAN, VCAN, CD74, SDC2	903	25	12297	4.90246	0.0912949	0.003981	0.386571
SMART	SM00211:TY	7	0.00508359	0.000416912	SMOC2, TACSTD2, SPOCK2, IGFBP2, IGFBP3, CD74, IGFBP5	549	13	6322	6.20064	0.114642	0.0200894	0.553403
INTERPRO	IPR000884:Thrombospondin, type 1 repeat	11	0.0079885	0.000103371	SEMA5B, ADAMTS8, WISP1, UNC5B, UNC5A, ADAMTSL3, THSD4, ADAMTS10, THBS1, ADAMTS2, ISM2	874	33	11604	4.42563	0.128728	0.0114178	0.169168
UP_SEQ_FEATURE	domain:Ig-like C2-type 1	16	0.0116196	6.20914e-05	FGFR2, ALCAM, NCAM1, TYRO3, IGSF8, FGFR3, CADM1, IGLON5, NTRK2, IGSF3, CNTN2, CXADR, MERTK, MCAM, BOC, CSF1R	814	66	11138	3.3171	0.129309	0.0105949	0.108057
UP_SEQ_FEATURE	domain:Ig-like C2-type 2	16	0.0116196	6.20914e-05	FGFR2, ALCAM, NCAM1, TYRO3, IGSF8, FGFR3, CADM1, IGLON5, NTRK2, IGSF3, CNTN2, CXADR, MERTK, MCAM, BOC, CSF1R	814	66	11138	3.3171	0.129309	0.0105949	0.108057
INTERPRO	IPR018097:EGF-like calcium-binding, conserved site	15	0.0108934	0.000110835	LTBP1, SVEP1, LTBP3, LTBP4, SCUBE1, NPNT, FBN1, JAG1, SLIT1, GAS6, SLIT2, NOTCH3, FAT3, ACAN, VCAN	874	60	11604	3.31922	0.137355	0.0113012	0.181372
GOTERM_BP_DIRECT	GO:0030154~cell differentiation	63	0.0457523	4.33699e-05	NRP2, CDX1, NRP1, CADM1, MYO7B, NPNT, PAX6, DLK1, GLI2, SDC2, DAB2, WNT4, SEMA7A, SEMA3C, SCX, SPATA24, SRPK2, CTBP2, MDGA1, SOX11, EFNB2, SLIT1, SLIT2, ASCL2, VEGFB, PRKD1, DLL4, VEGFA, VAMP5, EFNA5, TGFB1I1, PMP22, GADD45B, DBN1, TNFAIP2, WNT5A, EID1, FRK, NKD1, FGFR3, TDRD7, FHL1, MDK, SEMA5B, TDRKH, TCF4, CREBL2, TESC, BMP2, FZD5, NOTCH3, SFRP5, SFRP1, SEMA6D, NXN, ETS1, IRF6, NTRK2, MYCBPAP,…	794	504	10723	1.68813	0.142885	0.0217854	0.0795411
GOTERM_MF_DIRECT	GO:0043395~heparan sulfate proteoglycan binding	7	0.00508359	0.000172657	GPC4, GPC3, GPC6, FST, ATP1A3, SLIT1, SLIT2	761	13	10304	7.29081	0.150704	0.0400142	0.270519
GOTERM_BP_DIRECT	GO:0007275~multicellular organism development	79	0.0573719	4.80639e-05	NRP2, CDX1, NRP1, CADM1, NPNT, DYNC2LI1, PAX6, JAG1, GLI2, DAB2, WNT4, LBH, UNC5B, UNC5A, SEMA7A, SEMA3C, DND1, SCX, SPATA24, ARC, MDGA1, SOX11, EFNB2, EMX2, SIX2, SLIT1, SLIT2, ASCL2, VEGFB, DLL4, VEGFA, VAMP5, RYR2, EFNA5, GADD45B, DBN1, TNFAIP2, KIF26B, WNT5A, NKD1, TDRD7, FHL1, CTNND2, MDK, MEIS1, HIC1, EPHB2, SEMA5B, TNFRSF1A, OVOL2, FAT3, NRARP, TCTN1, TCF4, MN1, FLRT3, CEBPA, BMP2, FLRT1, …	794	678	10723	1.5736	0.15707	0.0211324	0.0881464
GOTERM_BP_DIRECT	GO:0007409~axonogenesis	18	0.0130721	5.09104e-05	FGFR2, WNT5A, UCHL1, PAX6, RTN4R, CNP, BRSK1, NRN1, SLIT1, SLIT2, SLITRK4, APP, ULK1, BCL11B, MAPT, BCL2, CNTN2, KALRN	794	79	10723	3.0771	0.165557	0.0199093	0.0933644
UP_KEYWORDS	Cleavage on pair of basic residues	18	0.0130721	0.000556607	BMP2, GDF1, NTF3, ADAM23, TGFB3, MMP17, NMB, CDH2, CDH4, TGFB2, PRRG4, ADAMTS8, ADAMTS10, SCG5, ADAM22, PCSK5, UPK2, BMP6	903	96	12297	2.55336	0.170616	0.00745495	0.753992
UP_KEYWORDS	Signal-anchor	35	0.0254179	0.00056631	ATP1B1, FUT9, GCNT2, FAM69B, ECEL1, SYT8, MME, CD74, ST6GALNAC5, PRR7, ECE1, B3GALNT1, NSG1, HS6ST2, B3GNT3, HS6ST1, ACSL4, MGAT4A, B4GALT2, COL23A1, UST, CHST2, COLEC12, FIBCD1, PNPLA3, SIGIRR, ATF6, ST8SIA4, ASPHD2, ST14, ARXES2, CHST8, EXT1, SCARA5, AOC3	903	257	12297	1.85458	0.173317	0.00729381	0.76709
GOTERM_CC_DIRECT	GO:0045211~postsynaptic membrane	21	0.0152508	0.000399051	LRRC4, ARC, ADORA2A, GRIK3, CLSTN1, PSD3, TANC1, NCS1, GRIK5, SHANK2, PRR7, MAGEE1, CHRM4, CNIH2, DMD, NTRK2, NSG1, CHRNA4, NEURL1A, DBN1, SYNPO	849	118	11424	2.39468	0.177309	0.0114152	0.571328
GOTERM_BP_DIRECT	GO:0045669~positive regulation of osteoblast differentiation	14	0.0101672	6.11197e-05	CEBPA, BMP2, NPNT, SOX11, GJA1, JAG1, GDPD2, PRKD1, WNT4, WNT7B, VEGFA, LTF, BMP7, BMP6	794	51	10723	3.70727	0.195301	0.0214943	0.112077
UP_KEYWORDS	Postsynaptic cell membrane	17	0.0123459	0.000675032	LRRC4, ARC, CPEB3, GRIK3, CLSTN1, PSD3, TANC1, NCS1, GRIK5, SHANK2, PRR7, CHRM4, CNIH2, DMD, CHRNA4, NEURL1A, SYNPO	903	89	12297	2.60118	0.20299	0.00836803	0.913733
GOTERM_MF_DIRECT	GO:0005102~receptor binding	35	0.0254179	0.00024914	WNT5A, FGF18, FRK, NXPH4, CADM1, EHHADH, GJA1, ITGB5, KCNJ10, CNTFR, TGFB2, EPHB2, ACOX3, WNT4, APP, NSG1, IDH1, LBP, LPL, BMP2, TMC8, NUDT19, NTF3, EFNB2, ARTN, PRKCE, SLIT1, SLC9A3R2, SLIT2, GAS6, LAMA1, WNT7B, NCK1, VEGFA, JAK3	761	245	10304	1.9343	0.209995	0.0460491	0.390134
INTERPRO	IPR000716:Thyroglobulin type-1	7	0.00508359	0.000193015	SMOC2, TACSTD2, SPOCK2, IGFBP2, IGFBP3, CD74, IGFBP5	874	13	11604	7.14909	0.226874	0.0182117	0.315652
SMART	SM00082:LRRCT	11	0.0079885	0.000893021	LRRC4, ELFN1, FLRT3, SLITRK4, FLRT1, LINGO3, LRRN2, NTRK2, TPBG, SLIT1, SLIT2	549	37	6322	3.42352	0.229625	0.0365824	1.18192
GOTERM_CC_DIRECT	GO:0005604~basement membrane	15	0.0108934	0.000533513	FRAS1, MATN2, NPNT, TNC, FBN1, CASK, TIMP3, TGFB2, LAMA1, SMOC2, COL7A1, VEGFA, ACAN, EFNA5, LOXL2	849	70	11424	2.88339	0.229686	0.0143931	0.763155
SMART	SM00013:LRRNT	8	0.00580982	0.00100706	LRRC4, FLRT3, FLRT1, LINGO3, NTRK2, TPBG, SLIT1, SLIT2	549	20	6322	4.60619	0.25488	0.0361082	1.33192
GOTERM_BP_DIRECT	GO:0045165~cell fate commitment	12	0.00871472	8.27872e-05	FGFR2, GATA1, HES1, WNT5A, BMP2, WNT7B, WNT4, PPARG, PAX6, GAS1, TGFB1I1, SOX8	794	39	10723	4.1554	0.254962	0.0264016	0.151781
GOTERM_BP_DIRECT	GO:0001822~kidney development	20	0.0145245	8.54985e-05	SCHIP1, SOX11, FBN1, SIX2, MME, MMP17, GLI2, DCHS1, WT1, TGFB2, WNT4, GPC3, SULF2, BCL2, VEGFA, BMP7, IFT88, PCSK5, CAR2, BMP6	794	98	10723	2.75613	0.26211	0.0250119	0.156748
SMART	SM00327:VWA	11	0.0079885	0.00111978	MATN2, COCH, CACNA2D1, SVEP1, VWA5A, COL7A1, COL6A2, ITGA11, COL12A1, ITGB5, COL6A1	549	38	6322	3.33343	0.27903	0.0356981	1.47997
UP_SEQ_FEATURE	domain:TSP type-1 1	8	0.00580982	0.000167604	SEMA5B, ADAMTS8, UNC5B, UNC5A, THSD4, ADAMTS10, THBS1, ADAMTS2	814	18	11138	6.08135	0.311877	0.0263458	0.291426
UP_SEQ_FEATURE	domain:TSP type-1 2	8	0.00580982	0.000167604	SEMA5B, ADAMTS8, UNC5B, UNC5A, THSD4, ADAMTS10, THBS1, ADAMTS2	814	18	11138	6.08135	0.311877	0.0263458	0.291426
INTERPRO	IPR000483:Cysteine-rich flanking region, C-terminal	11	0.0079885	0.000295203	LRRC4, ELFN1, FLRT3, SLITRK4, FLRT1, LINGO3, LRRN2, NTRK2, TPBG, SLIT1, SLIT2	874	37	11604	3.94718	0.325352	0.0258964	0.482391
SMART	SM00121:IB	6	0.00435736	0.00142691	WISP1, HTRA1, IGFBP2, IGFBP3, CRIM1, IGFBP5	549	11	6322	6.28117	0.34095	0.0408383	1.88234
INTERPRO	IPR024079:Metallopeptidase, catalytic domain	12	0.00871472	0.000313548	ECE1, ADAMTS8, ECEL1, PAPPA, ADAM23, ADAMTS10, MMP17, MME, MMP28, ADAM22, ADAM8, ADAMTS2	874	44	11604	3.62097	0.341654	0.0257882	0.512296
SMART	SM00100:cNMP	7	0.00508359	0.00155182	PNPLA7, HCN2, PRKAR2A, RAPGEF3, KCNH2, HCN4, KCNH3	549	16	6322	5.03802	0.364589	0.0403875	2.04554
GOTERM_BP_DIRECT	GO:0051384~response to glucocorticoid	12	0.00871472	0.000136143	ALPL, CTSL, WNT7B, PTGS2, PAPPA, BCL2, IGFBP2, CDO1, MDK, PPARGC1B, GHR, BMP6	794	41	10723	3.95269	0.383701	0.0365479	0.249488
KEGG_PATHWAY	mmu04350:TGF-beta signaling pathway	14	0.0101672	0.00200155	BMP2, LTBP1, FST, TGFB3, SMAD3, TGFB2, ID2, ID1, ID3, THBS1, BMP7, BAMBI, CHRD, BMP6	350	68	4454	2.62	0.384217	0.149236	2.55625
UP_KEYWORDS	Heparan sulfate	6	0.00435736	0.00164288	GPC4, GPC3, NRP1, SPOCK2, GPC6, SDC2	903	13	12297	6.2852	0.42447	0.0195374	2.21034
GOTERM_BP_DIRECT	GO:0048468~cell development	9	0.00653604	0.000155543	GATA1, MAF, GDF1, IRX5, ID2, GATA6, IRF6, BMP7, GJC1	794	23	10723	5.28458	0.424777	0.0387299	0.284991
INTERPRO	IPR000372:Leucine-rich repeat-containing N-terminal	8	0.00580982	0.000432154	LRRC4, FLRT3, FLRT1, LINGO3, NTRK2, TPBG, SLIT1, SLIT2	874	20	11604	5.31076	0.437962	0.0333253	0.705438
UP_SEQ_FEATURE	domain:Fibronectin type-III	10	0.00726227	0.000262125	ELFN1, FNDC4, ELFN2, TRIM36, LRRN4, PTPRG, MDGA1, MID2, GHR, KALRN	814	31	11138	4.41389	0.44268	0.0382246	0.455424
GOTERM_BP_DIRECT	GO:0045665~negative regulation of neuron differentiation	14	0.0101672	0.000171786	RAP1GAP, SLC6A4, PAX6, ZHX2, JAG1, MEIS1, TTC3, HES1, NOTCH3, APP, ID2, CNTN2, PBX1, BMP7	794	56	10723	3.37626	0.457057	0.0398989	0.314707
GOTERM_BP_DIRECT	GO:0031290~retinal ganglion cell axon guidance	7	0.00508359	0.000175314	ALCAM, NRP1, EFNA5, SLIT1, SLIT2, EPHB1, EPHB2	794	13	10723	7.27194	0.463826	0.038207	0.321161
GOTERM_CC_DIRECT	GO:0043197~dendritic spine	18	0.0130721	0.00128465	LRRC4, ARC, CDK5R1, CRYAB, SYT11, DRD4, ASAP1, ITPKA, SHANK2, CTTNBP2, RGS10, APP, CNIH2, NTRK2, PDE4B, NEURL1A, DBN1, SYNPO	849	102	11424	2.37456	0.466661	0.0325428	1.82843
GOTERM_BP_DIRECT	GO:0021772~olfactory bulb development	8	0.00580982	0.000181804	ID2, EFNA2, PAX6, SKI, EXT1, SLIT1, SLIT2, CSF1R	794	18	10723	6.00224	0.476056	0.037308	0.333031
SMART	SM00214:VWC	7	0.00508359	0.00222475	FRAS1, WISP1, COL3A1, JAG1, THBS1, CHRD, CRIM1	549	17	6322	4.74167	0.478137	0.0527534	2.92048
SMART	SM00204:TGFB	7	0.00508359	0.00222475	BMP2, GDF1, TGFB3, ARTN, BMP7, TGFB2, BMP6	549	17	6322	4.74167	0.478137	0.0527534	2.92048
GOTERM_BP_DIRECT	GO:0006954~inflammatory response	24	0.0174294	0.000183988	BMP2, PTGS2, TSPAN2, PPARG, CHST2, IL17RE, CX3CL1, PXK, SGMS1, NRADD, CCL7, PRKD1, TNFRSF1A, CYBA, SEMA7A, CYP26B1, PSTPIP1, NPPB, BCL6, THBS1, ADAM8, CSF1R, CAMK1D, BMP6	794	138	10723	2.3487	0.480109	0.0356885	0.337025
GOTERM_BP_DIRECT	GO:0001666~response to hypoxia	25	0.0181557	0.000186185	ATP1B1, ACVRL1, FOSL2, CLDN3, SLC6A4, TGFB3, SOX4, ADA, TGFB2, ALAS2, ECE1, PLOD2, CHRNA4, LOXL2, NOX4, BMP2, CRYAB, SMAD3, ASCL2, VEGFB, CYBA, ETS1, VEGFA, RYR2, NPPB	794	147	10723	2.29678	0.484155	0.0342395	0.341043
GOTERM_BP_DIRECT	GO:0001525~angiogenesis	28	0.0203344	0.000200124	FGFR2, NRP2, FGF18, ACVRL1, NRP1, PTGS2, RORA, MEIS1, EPHB1, EPHB2, OVOL2, UNC5B, HS6ST1, RAPGEF3, ADAM8, SRPK2, VAV3, EFNB2, MCAM, FZD5, FLNA, VEGFB, PRKD1, WNT7B, DLL4, VEGFA, TNFAIP2, ENG	794	175	10723	2.16081	0.509098	0.0349502	0.366532
UP_KEYWORDS	Neurogenesis	26	0.0188819	0.00232782	NRP2, NRP1, BRSK1, EPHB1, SDC2, EPHB2, SEMA5B, SEMA7A, SEMA3C, TCF4, NES, BEND6, SOX11, MDGA1, EFNB2, SLIT1, SLIT2, PRKD1, ASCL2, SEMA6D, DLL4, NTRK2, EFNA5, C77370, DBN1, CAMK1D	903	186	12297	1.90358	0.542995	0.0266408	3.11842
INTERPRO	IPR014710:RmlC-like jelly roll fold	9	0.00653604	0.000606988	PNPLA7, HCN2, PRKAR2A, PIR, RAPGEF3, KCNH2, HCN4, CDO1, KCNH3	874	27	11604	4.42563	0.554857	0.0439685	0.989503
INTERPRO	IPR002126:Cadherin	9	0.00653604	0.000606988	RET, FAT3, CLSTN1, CDH2, PCDH7, CDH4, DCHS1, CDH23, PCDH18	874	27	11604	4.42563	0.554857	0.0439685	0.989503
UP_SEQ_FEATURE	domain:EGF-like 2	12	0.00871472	0.000366023	MATN2, NOTCH3, LTBP1, FAT3, DLL4, TNC, FBN1, CNTNAP2, DLK1, JAG1, SLIT1, SLIT2	814	46	11138	3.56949	0.557971	0.0497439	0.635397
UP_SEQ_FEATURE	domain:Thyroglobulin type-1	6	0.00435736	0.000378341	TACSTD2, SPOCK2, IGFBP2, IGFBP3, CD74, IGFBP5	814	10	11138	8.20983	0.569953	0.0484269	0.656715
UP_SEQ_FEATURE	domain:VWFA 2	6	0.00435736	0.000378341	MATN2, COCH, COL7A1, COL6A2, COL12A1, COL6A1	814	10	11138	8.20983	0.569953	0.0484269	0.656715
UP_SEQ_FEATURE	domain:VWFA 1	6	0.00435736	0.000378341	MATN2, COCH, COL7A1, COL6A2, COL12A1, COL6A1	814	10	11138	8.20983	0.569953	0.0484269	0.656715
UP_SEQ_FEATURE	domain:EGF-like 10; calcium-binding	6	0.00435736	0.000378341	NOTCH3, LTBP1, LTBP3, LTBP4, FBN1, JAG1	814	10	11138	8.20983	0.569953	0.0484269	0.656715
GOTERM_MF_DIRECT	GO:0050431~transforming growth factor beta binding	7	0.00508359	0.000963867	ACVRL1, LTBP1, LTBP3, LTBP4, TGFB3, THBS1, ENG	761	17	10304	5.57533	0.598384	0.141049	1.50145
KEGG_PATHWAY	mmu04015:Rap1 signaling pathway	23	0.0167032	0.00388492	FGFR2, FGF18, FGFR3, MAGI1, RAP1GAP, ADORA2A, GNAI1, ADCY5, EFNA2, PRKCG, KITL, VEGFB, PRKD1, PFN2, ID1, RAC3, VEGFA, RASGRP2, CALM3, EFNA5, RAPGEF3, THBS1, CSF1R	350	154	4454	1.90059	0.610145	0.209821	4.90638
GOTERM_BP_DIRECT	GO:0042391~regulation of membrane potential	12	0.00871472	0.000269365	HCN2, CNIH2, GRIK3, DMD, GRIK5, CHRNA4, KCNJ10, PXK, KCNH2, HCN4, KCNH3, RIMS3	794	44	10723	3.68319	0.616234	0.0445815	0.493053
GOTERM_BP_DIRECT	GO:0001938~positive regulation of endothelial cell proliferation	12	0.00871472	0.000269365	VEGFB, PRKD1, WNT5A, CYBA, BMP2, PPP1R16B, ACVRL1, FGFR3, NRARP, F3, VEGFA, BMP6	794	44	10723	3.68319	0.616234	0.0445815	0.493053
GOTERM_BP_DIRECT	GO:0030593~neutrophil chemotaxis	8	0.00580982	0.0002696	VAV3, PDE4B, PDE4D, CXCR2, CX3CL1, CXADR, CCL7, TGFB2	794	19	10723	5.68633	0.616554	0.0426352	0.493481
INTERPRO	IPR000595:Cyclic nucleotide-binding domain	7	0.00508359	0.000740171	PNPLA7, HCN2, PRKAR2A, RAPGEF3, KCNH2, HCN4, KCNH3	874	16	11604	5.80864	0.627312	0.0506218	1.20538
INTERPRO	IPR010909:PLAC	6	0.00435736	0.000750039	ADAMTSL3, THSD4, ADAMTS10, PCSK6, PCSK5, ADAMTS2	874	11	11604	7.24194	0.632186	0.048779	1.22136
GOTERM_CC_DIRECT	GO:0070062~extracellular exosome	175	0.12709	0.00208688	SLC44A1, ATP1B1, CADM1, LTBP3, LTBP4, PGAM2, CNP, SYT7, GSTM5, ACTG2, PRKAR2A, DAB2, APP, SLC2A5, BHLHB9, PLOD2, HTRA1, SBSN, AIF1L, COL12A1, RNF149, RAPGEF3, NQO1, DDAH2, COCH, ALDH6A1, MYO6, CRYAB, PTPRG, QDPR, COLEC12, NCAM1, RND3, IGSF8, TRIM36, CST6, TACSTD2, F3, ST14, VAMP5, DSP, RYR2, TUBA4A, RAB15, KALRN, FAM171A1, COASY, GNAI1, ALDOC, PTH1R, WDR60, ITGB5, MME, UBE2V2, TIMP3, EPHB1, CD74,…	849	1924	11424	1.22389	0.639963	0.0497949	2.9544
INTERPRO	IPR015919:Cadherin-like	9	0.00653604	0.000794411	RET, FAT3, CLSTN1, CDH2, PCDH7, CDH4, DCHS1, CDH23, PCDH18	874	28	11604	4.26757	0.653326	0.0491949	1.29318
UP_SEQ_FEATURE	compositionally biased region:Cys-rich	15	0.0108934	0.000523576	SLC44A1, LTBP3, ADAM23, LTBP4, EPHB1, ZDBF2, EPHB2, SERINC5, DAGLA, ADAMTS8, MDFIC, ADAMTS10, TCTN1, ADAM22, ADAMTS2	814	71	11138	2.89078	0.688974	0.0628221	0.907728
GOTERM_BP_DIRECT	GO:0007267~cell-cell signaling	12	0.00871472	0.000333052	FGFR2, GATA1, WNT5A, WNT4, ADRB1, FGFR3, WISP1, FJX1, GJA1, FGFBP1, GJB2, GJC1	794	45	10723	3.60134	0.694008	0.0501839	0.609291
INTERPRO	IPR017878:TB domain	5	0.00363113	0.000926029	LTBP1, LTBP3, LTBP4, FST, FBN1	874	7	11604	9.48349	0.709156	0.0545885	1.50591
GOTERM_BP_DIRECT	GO:0009887~organ morphogenesis	16	0.0116196	0.000380102	FGFR2, WNT5A, BMP2, NRP1, EFNB2, TGFB3, JAG1, EPHB2, GATA1, GPC3, BCL2, TGM1, PBX1, GAMT, BMP7, IFT88	794	76	10723	2.84317	0.741153	0.054757	0.695081
SMART	SM00060:FN3	17	0.0123459	0.00461827	TYRO3, LRRN4, PTPRG, TNC, CNTFR, EPHB1, EPHB2, MID2, NCAM1, FNDC4, COL7A1, FNDC1, CNTN2, COL12A1, MERTK, BOC, KALRN	549	91	6322	2.15124	0.74119	0.0987511	5.9743
GOTERM_BP_DIRECT	GO:0060080~inhibitory postsynaptic potential	5	0.00363113	0.000394661	ADRB1, ADORA2A, DRD4, CHRNA4, CX3CL1	794	6	10723	11.2542	0.754215	0.0545855	0.721614
INTERPRO	IPR002035:von Willebrand factor, type A	13	0.00944095	0.00107607	MATN2, COCH, CACNA2D1, SVEP1, VWA5A, ITGA11, ITGB5, COL7A1, INTS6, COL6A2, COL6A1, COL12A1, SEC24D	874	58	11604	2.97585	0.761925	0.0604917	1.74788
GOTERM_BP_DIRECT	GO:0048469~cell maturation	9	0.00653604	0.000406122	CEBPA, HES1, ID2, PTH1R, PPARG, VEGFA, BFSP1, FZD5, SOX8	794	26	10723	4.67482	0.764032	0.0540265	0.742496
GOTERM_CC_DIRECT	GO:0043005~neuron projection	36	0.0261442	0.00306564	CADM1, PTGS2, CPEB3, SLC6A4, GRIK5, CTNND2, NMB, CXADR, NRADD, SYP, NPTX1, APP, RAC3, MAPT, BCL11B, RASGRP2, AVIL, RAP1GAP2, HCN4, NEFL, SLC6A12, SYT11, KIF5C, QDPR, RTN4R, BSN, PRKCG, SHANK2, CTSL, KIF1A, ULK1, SH3KBP1, CNTN2, CALM3, RYR2, KALRN	849	291	11424	1.66464	0.777182	0.0689993	4.31188
SMART	SM00112:CA	8	0.00580982	0.00540664	FAT3, CLSTN1, CDH2, PCDH7, CDH4, DCHS1, CDH23, PCDH18	549	26	6322	3.54323	0.794646	0.106914	6.96053
INTERPRO	IPR000867:Insulin-like growth factor-binding protein, IGFBP	6	0.00435736	0.00120651	WISP1, HTRA1, IGFBP2, IGFBP3, CRIM1, IGFBP5	874	12	11604	6.63844	0.799962	0.0648534	1.9578
GOTERM_CC_DIRECT	GO:0005911~cell-cell junction	23	0.0167032	0.0033191	FLRT3, FLRT1, OCLN, CADM1, ARHGEF6, GJA1, CASK, PRKCG, CDH2, ITGA4, CXADR, AQP3, FLNA, NCAM1, PRKD1, LAMA1, APP, NCK1, FNDC1, PKP4, SH3KBP1, DSP, DBN1	849	159	11424	1.94644	0.803234	0.0712329	4.66052
KEGG_PATHWAY	mmu04974:Protein digestion and absorption	9	0.00653604	0.00673378	ATP1B1, COL7A1, COL3A1, ATP1A3, COL6A2, MME, COL12A1, COL6A1, SLC7A7	350	37	4454	3.09544	0.805064	0.278929	8.36206
GOTERM_BP_DIRECT	GO:0008217~regulation of blood pressure	10	0.00726227	0.000483311	EDNRB, CYBA, ACVRL1, ECE1, PTGS2, ACTA2, PPARG, NPR3, GCH1, AOC3	794	33	10723	4.09244	0.82068	0.0616678	0.883025
GOTERM_CC_DIRECT	GO:0044306~neuron projection terminus	6	0.00435736	0.00356724	SYP, FLRT1, DMD, UCHL1, BSN, MME	849	15	11424	5.38233	0.825791	0.0731636	5.00069
SMART	SM00369:LRR_TYP	16	0.0116196	0.00647613	LRRC4, FLRT3, FLRT1, RTN4RL1, LRRN4, LRRN2, RTN4R, TPBG, SLIT1, SLIT2, LRRC10B, ELFN1, ELFN2, SLITRK4, LINGO3, LRCH2	549	86	6322	2.14242	0.850009	0.118807	8.28316
GOTERM_CC_DIRECT	GO:0014069~postsynaptic density	25	0.0181557	0.00389448	CDK5R1, ARC, ADORA2A, CRYAB, SYT11, CLSTN1, GRIK5, TANC1, NCS1, CTNND2, PSD3, BSN, PRKCG, SHANK2, NCK2, CHRM4, CNIH2, MAPT, PKP4, PDE4B, NTRK2, NEURL1A, DBN1, KALRN, SYNPO	849	181	11424	1.85854	0.851641	0.0764265	5.44758
GOTERM_BP_DIRECT	GO:0045216~cell-cell junction organization	8	0.00580982	0.000545871	OCLN, LIMS2, TGFB3, SMAD3, GJA1, CXADR, FLNA, TGFB2	794	21	10723	5.14478	0.856454	0.0669766	0.996785
INTERPRO	IPR001007:von Willebrand factor, type C	7	0.00508359	0.00150613	FRAS1, WISP1, COL3A1, JAG1, THBS1, CHRD, CRIM1	874	18	11604	5.16323	0.865901	0.0772226	2.43839
INTERPRO	IPR001839:Transforming growth factor-beta, C-terminal	7	0.00508359	0.00150613	BMP2, GDF1, TGFB3, ARTN, BMP7, TGFB2, BMP6	874	18	11604	5.16323	0.865901	0.0772226	2.43839
GOTERM_CC_DIRECT	GO:0030425~dendrite	37	0.0268704	0.00410069	GNAZ, KCNC1, CDK5R1, LTBP1, ACVRL1, CADM1, RAP1GAP, CPEB3, ADORA2A, GRIK3, DRD4, GRIK5, NCS1, CTNND2, CASK, MME, SYT7, EPHB1, EPHB2, ALCAM, FAT3, MAPT, CHRNA4, GCHFR, AATK, SYNPO, RET, ICA1, TANC1, BSN, PRKCG, ELFN1, CYBA, PLK3, MAGEE1, CNIH2, NTRK2	849	307	11424	1.62171	0.865926	0.0772292	5.72819
GOTERM_CC_DIRECT	GO:0042995~cell projection	57	0.0413949	0.00433595	MYO7B, ADCY5, CLSTN1, DYNC2LI1, CNP, CTTNBP2, PIP5KL1, UNC5A, MAPT, AIF1L, CNTNAP2, NEURL1A, WDR35, ARC, MYO6, MAGI1, ARHGEF6, ARHGEF5, LDB3, PRKCG, PKD2L1, DBN1, IFT88, BBS9, WDR60, CTNND2, STARD10, AFAP1L1, CX3CL1, MDK, EPHB1, EPHB2, ALCAM, PPP1R16B, RAC3, PLEKHG6, RASGRP2, AVIL, PSTPIP1, TCTN1, TUBB4A, SYNPO, AATK, AGBL2, FLRT3, TESC, FLRT1, MYO1G, DPYSL3, SHANK2, KITL, ELFN1, TULP1, PROM2, CN…	849	530	11424	1.44714	0.880554	0.078476	6.04737
SMART	SM00231:FA58C	5	0.00363113	0.00767453	NRP2, NRP1, CPXM1, F8, CNTNAP2	549	10	6322	5.75774	0.894559	0.131164	9.74454
KEGG_PATHWAY	mmu04060:Cytokine-cytokine receptor interaction	14	0.0101672	0.00947326	BMP2, TGFB3, CXCR2, CNTFR, CX3CL1, CCL7, TGFB2, TNFRSF1A, CXCL16, TNFRSF19, BMP7, CSF2RA, CSF1R, GHR	350	81	4454	2.19951	0.900087	0.318807	11.5754
INTERPRO	IPR003591:Leucine-rich repeat, typical subtype	16	0.0116196	0.00173728	LRRC4, FLRT3, FLRT1, RTN4RL1, LRRN4, LRRN2, RTN4R, TPBG, SLIT1, SLIT2, LRRC10B, ELFN1, ELFN2, SLITRK4, LINGO3, LRCH2	874	86	11604	2.47012	0.90151	0.0852882	2.80763
GOTERM_MF_DIRECT	GO:0005520~insulin-like growth factor binding	6	0.00435736	0.00245856	WISP1, HTRA1, IGFBP2, IGFBP3, CRIM1, IGFBP5	761	14	10304	5.80289	0.902574	0.28299	3.78809
UP_SEQ_FEATURE	domain:IGFBP N-terminal	6	0.00435736	0.00105094	WISP1, HTRA1, IGFBP2, IGFBP3, CRIM1, IGFBP5	814	12	11138	6.84152	0.904137	0.116101	1.81417
GOTERM_CC_DIRECT	GO:0005882~intermediate filament	9	0.00653604	0.00497836	NES, ADORA2A, BFSP1, MNS1, DSP, GJA1, SYNM, KRT20, NEFL	849	37	11424	3.27304	0.912883	0.0864242	6.91385
GOTERM_BP_DIRECT	GO:2000178~negative regulation of neural precursor cell proliferation	6	0.00435736	0.000692418	LIMS2, KDM2B, BTG2, ID2, PAX6, SPINT1	794	11	10723	7.36638	0.91477	0.0814053	1.26278
KEGG_PATHWAY	mmu04024:cAMP signaling pathway	18	0.0130721	0.0105782	HCN2, ATP1B1, VAV3, ADORA2A, GNAI1, ADCY5, ATP1A3, PDE4D, ACOX3, MYL9, ADRB1, RAC3, PDE4B, CALM3, RYR2, RAPGEF3, HCN4, LIPE	350	119	4454	1.9249	0.923737	0.307642	12.8419
GOTERM_BP_DIRECT	GO:0071773~cellular response to BMP stimulus	8	0.00580982	0.000750016	BMP2, ACVRL1, SFRP1, GATA6, SPINT1, BMP7, SCX, BMP6	794	22	10723	4.91092	0.930561	0.0850723	1.36714
GOTERM_MF_DIRECT	GO:0004222~metalloendopeptidase activity	13	0.00944095	0.00288977	ECEL1, ADAM23, MME, MMP17, MMP28, ADAMTS8, ECE1, PAPPA, THSD4, ADAMTS10, ADAM22, ADAM8, ADAMTS2	761	66	10304	2.66699	0.93528	0.289801	4.43849
GOTERM_BP_DIRECT	GO:0048839~inner ear development	10	0.00726227	0.000774063	CEBPA, MAF, BMP2, MYO6, FGFR3, LRP10, TGFB3, JAG1, CDH23, TGFB2	794	35	10723	3.85858	0.936255	0.0849732	1.41068
GOTERM_BP_DIRECT	GO:0001657~ureteric bud development	10	0.00726227	0.000774063	FGFR2, RET, SFRP1, NPNT, BCL2, SMAD3, VCAN, BMP7, WT1, SLIT2	794	35	10723	3.85858	0.936255	0.0849732	1.41068
GOTERM_CC_DIRECT	GO:0016323~basolateral plasma membrane	19	0.0137983	0.00582198	ATP1B1, NKD2, CADM1, CAR11, PTH1R, CASK, KCNJ10, CDH2, CXADR, SLC7A6, AQP3, SLC7A7, PROM2, ST14, DSP, SLC22A5, HCN4, SLC40A1, CAR2	849	127	11424	2.01308	0.942459	0.0969468	8.0404
UP_KEYWORDS	Serine protease	10	0.00726227	0.00846689	KLK6, HTRA1, KLK4, ST14, LTF, PRSS16, RHBDL3, PCSK6, PRSS23, PCSK5	903	49	12297	2.77917	0.942558	0.0908389	10.9157
UP_SEQ_FEATURE	domain:EGF-like 9	7	0.00508359	0.00128582	MATN2, NOTCH3, SVEP1, TNC, JAG1, SLIT1, SLIT2	814	18	11138	5.32118	0.943257	0.133646	2.21537
UP_SEQ_FEATURE	domain:EGF-like 8	7	0.00508359	0.00128582	MATN2, SVEP1, DLL4, TNC, JAG1, SLIT1, SLIT2	814	18	11138	5.32118	0.943257	0.133646	2.21537
GOTERM_CC_DIRECT	GO:0009897~external side of plasma membrane	18	0.0130721	0.00614652	ENOX2, RTN4RL1, SCUBE1, DLK1, ITGA4, MCAM, CD74, ADA, LY6A, NCAM1, GPC4, ALCAM, CTSL, ECE1, SEMA7A, CHRNA4, THBS1, ENG	849	118	11424	2.05258	0.95095	0.0987413	8.47041
KEGG_PATHWAY	mmu05410:Hypertrophic cardiomyopathy (HCM)	10	0.00726227	0.0124588	CACNA2D1, DMD, PRKAG2, TGFB3, ITGA11, RYR2, ITGB5, PRKAA2, ITGA4, TGFB2	350	49	4454	2.59708	0.951875	0.315622	14.9588
GOTERM_BP_DIRECT	GO:0010628~positive regulation of gene expression	34	0.0246917	0.000854054	FGFR2, TNC, SLC6A4, TGFB3, PAX6, GJA1, SGMS1, SOX8, TGFB2, TNFRSF1A, ACTG2, CYP26B1, PPP3CA, SCX, MAF, SRPK2, TESC, RET, BMP2, ACTA1, ACTA2, SOX11, SMAD3, RNF207, GAS6, HES1, WNT7B, ID2, ID1, DLL4, VEGFA, NTRK2, ENG, KLF4	794	251	10723	1.82937	0.952043	0.0905549	1.55538
GOTERM_MF_DIRECT	GO:0045499~chemorepellent activity	7	0.00508359	0.00327654	FLRT3, SEMA5B, SEMA6D, SEMA3G, SEMA3C, EFNA5, SLIT2	761	21	10304	4.51336	0.955162	0.291756	5.01834
KEGG_PATHWAY	mmu05206:MicroRNAs in cancer	19	0.0137983	0.0127849	SLC45A3, FGFR3, PTGS2, TNC, PIM1, PRKCG, ZEB2, PRKCE, TIMP3, IRS1, PDCD4, TGFB2, NOTCH3, CCND1, BCL2, VEGFA, ST14, MARCKS, THBS1	350	131	4454	1.84571	0.955572	0.292479	15.321
GOTERM_BP_DIRECT	GO:0007507~heart development	29	0.0210606	0.00090899	NRP2, NRP1, PPARG, COL3A1, PDLIM3, SOX4, GJA1, CXADR, GLI2, WT1, GJC1, TGFB2, GATA1, ECE1, OVOL2, ACAN, SEMA3C, PCSK5, FLRT3, BMP2, FBN1, ITGA4, VEGFB, ID2, ID1, VCAN, ID3, IFT88, ENG	794	202	10723	1.93884	0.960558	0.0933217	1.65465
GOTERM_MF_DIRECT	GO:0008083~growth factor activity	12	0.00871472	0.00348232	VEGFB, FGF18, BMP2, NTF3, VEGFA, TGFB3, ARTN, BMP7, MDK, KITL, TGFB2, BMP6	761	59	10304	2.75391	0.963118	0.281078	5.32552
GOTERM_MF_DIRECT	GO:0005125~cytokine activity	12	0.00871472	0.00348232	WNT5A, BMP2, GDF1, CXCL16, VEGFA, TGFB3, CX3CL1, BMP7, KITL, CCL7, TGFB2, BMP6	761	59	10304	2.75391	0.963118	0.281078	5.32552
GOTERM_CC_DIRECT	GO:0043679~axon terminus	10	0.00726227	0.00690215	FLRT3, TULP1, RGS10, CHRM4, NTRK2, DRD4, TANC1, RAPGEF3, SYT7, AMPH	849	47	11424	2.86294	0.966185	0.106756	9.46434
GOTERM_CC_DIRECT	GO:0043195~terminal bouton	12	0.00871472	0.00695164	SYP, PFN2, APP, GRIK3, SYT11, NTRK2, DRD4, GRIK5, SYT7, HCN4, SYNGR1, AMPH	849	64	11424	2.52297	0.966999	0.104201	9.5291
UP_SEQ_FEATURE	domain:EGF-like 11; calcium-binding	6	0.00435736	0.00160582	NOTCH3, LTBP1, LTBP3, LTBP4, FBN1, JAG1	814	13	11138	6.31525	0.972232	0.156892	2.75946
INTERPRO	IPR015615:Transforming growth factor-beta-related	6	0.00435736	0.00268638	BMP2, GDF1, TGFB3, BMP7, TGFB2, BMP6	874	14	11604	5.69009	0.972285	0.124365	4.31006
GOTERM_BP_DIRECT	GO:0040007~growth	8	0.00580982	0.0010101	BMP2, BCL2, VEGFA, TGFB3, SEPP1, BMP7, TGFB2, BMP6	794	23	10723	4.6974	0.972476	0.100277	1.83709
GOTERM_BP_DIRECT	GO:0001501~skeletal system development	15	0.0108934	0.00105314	RAI1, LTBP3, SOX11, PTH1R, COL3A1, FST, FBN1, SMAD3, SOX4, NPR3, GLI2, TGFB2, RASSF2, VCAN, CHRD	794	75	10723	2.70101	0.976385	0.101497	1.91465
GOTERM_CC_DIRECT	GO:0016324~apical plasma membrane	26	0.0188819	0.00793665	ATP1B1, OCLN, CLDN4, PTH1R, GJA1, KCNJ10, CNTFR, CDH2, JAG1, ANXA6, DAB2, SLC2A5, SLCO3A1, SLC22A5, PRKAA2, SLC39A4, UPK2, NOX4, PDE4D, SLC9A3R2, SHANK2, CYBA, PROM2, STC1, IGFBP2, SLC46A1	849	202	11424	1.73194	0.979687	0.114644	10.8088
GOTERM_MF_DIRECT	GO:0005515~protein binding	263	0.190998	0.00416192	ATP1B1, CADM1, ADCY5, EFNA2, PGAM2, RORA, SYT7, SYP, HOOK2, APP, PIP5KL1, RAVER2, HTRA1, CHRNA4, PELI2, ADAM8, CDH23, LRRC4, MAGI1, STC2, CRYAB, KIF5C, ZFP467, PIM1, ZHX2, BSN, PPARGC1B, HES1, RND3, MAGEE1, VEGFA, RYR2, RAB15, EFNA5, DBN1, KIF26B, CDK5R1, GNAI1, TDRD7, ASAP1, KRT20, AFAP1L1, IGF2BP3, CD74, EPHB1, EPHB2, ALCAM, PFN2, RAC3, DMD, TCTN1, TCF4, IQSEC2, BMP2, NTF3, SMAD3, SKI, GAS1, SY…	761	3105	10304	1.14687	0.980656	0.301396	6.33335
GOTERM_CC_DIRECT	GO:0030672~synaptic vesicle membrane	9	0.00653604	0.00814432	SYP, ICA1, SLC17A5, SYT11, SYT7, SYNGR1, ABCC8, SYNGR3, AMPH	849	40	11424	3.02756	0.981664	0.114124	11.0765
UP_KEYWORDS	Leucine-rich repeat	19	0.0137983	0.0120488	LRRC4, FLRT3, FLRT1, RTN4RL1, LRRN4, LRRN2, RTN4R, TPBG, SLIT1, SLIT2, ELFN1, ELFN2, SLITRK4, KDM2B, LINGO3, LRCH2, NTRK2, ANP32A, FBXL6	903	138	12297	1.87493	0.982973	0.123121	15.1922
GOTERM_BP_DIRECT	GO:0001649~osteoblast differentiation	17	0.0123459	0.00119677	ALPL, BMP2, TNC, MRC2, ITGA11, SMAD3, GJA1, GLI2, SOX8, SFRP1, SEMA7A, COL6A1, VCAN, IGFBP3, CHRD, IGFBP5, BMP6	794	93	10723	2.46866	0.985836	0.111528	2.17308
UP_KEYWORDS	Ligand-gated ion channel	6	0.00435736	0.0128788	HCN2, GRIK3, GRIK5, CHRNA4, RYR2, HCN4	903	20	12297	4.08538	0.987162	0.127249	16.1557
KEGG_PATHWAY	mmu05414:Dilated cardiomyopathy	10	0.00726227	0.0181372	CACNA2D1, ADRB1, ADCY5, DMD, TGFB3, ITGA11, RYR2, ITGB5, ITGA4, TGFB2	350	52	4454	2.44725	0.98808	0.357861	21.0666
UP_KEYWORDS	Potassium transport	9	0.00653604	0.0135322	HCN2, KCNC1, KCNQ5, ATP1B1, ATP1A3, KCNJ10, KCNH2, HCN4, KCNH3	903	44	12297	2.78549	0.989723	0.129531	16.9069
KEGG_PATHWAY	mmu05412:Arrhythmogenic right ventricular cardiomyopathy (ARVC)	9	0.00653604	0.0191424	CACNA2D1, DMD, ITGA11, RYR2, ITGB5, DSP, GJA1, CDH2, ITGA4	350	44	4454	2.60299	0.990697	0.346371	22.1046
INTERPRO	IPR018490:Cyclic nucleotide-binding-like	7	0.00508359	0.00362348	PNPLA7, HCN2, PRKAR2A, RAPGEF3, KCNH2, HCN4, KCNH3	874	21	11604	4.42563	0.992084	0.158708	5.77205
GOTERM_BP_DIRECT	GO:0030855~epithelial cell differentiation	11	0.0079885	0.00136794	FGFR2, TAGLN, GATA6, ALDOC, PPARG, VEGFA, ID3, TGFB1I1, BMP7, WT1, UPK2	794	45	10723	3.30123	0.992299	0.123241	2.48021
GOTERM_MF_DIRECT	GO:0004252~serine-type endopeptidase activity	12	0.00871472	0.00517102	KLK6, HTRA1, F3, KLK4, ST14, F8, LTF, CTSC, RHBDL3, PCSK6, PRSS23, PCSK5	761	62	10304	2.62066	0.992587	0.335491	7.81133
GOTERM_BP_DIRECT	GO:0010629~negative regulation of gene expression	24	0.0174294	0.0014265	BMP2, FGFR3, ACVRL1, STC2, CRYAB, SOX11, GJA1, PARP10, SLIT2, H19, TGFB2, HES1, TNFRSF1A, WNT4, SFRP1, ID2, ID1, DLL4, VEGFA, PPP3CA, ID3, TCF4, ENG, KLF4	794	159	10723	2.0385	0.993748	0.125014	2.58507
GOTERM_CC_DIRECT	GO:0071944~cell periphery	10	0.00726227	0.0104045	NOX4, ACTG2, NKD2, RAC3, MYO1B, PDE4B, ARHGEF5, EFNA5, RAPGEF3, PRKCE	849	50	11424	2.69117	0.993991	0.139658	13.9415
GOTERM_BP_DIRECT	GO:0007612~learning	10	0.00726227	0.0014629	PAK6, ARC, PTGS2, NTRK2, CTNND2, CNTN2, CNTNAP2, SHANK2, AMPH, EPHB2	794	38	10723	3.55396	0.994508	0.124926	2.65021
GOTERM_BP_DIRECT	GO:0010718~positive regulation of epithelial to mesenchymal transition	9	0.00653604	0.00147357	GLIPR2, DAB2, BMP2, GCNT2, TGFB3, SMAD3, TGFB1I1, BAMBI, TGFB2	794	31	10723	3.92082	0.994713	0.122835	2.6693
GOTERM_BP_DIRECT	GO:0001974~blood vessel remodeling	9	0.00653604	0.00147357	ACVRL1, DLL4, VEGFA, TGM2, SEMA3C, ITGA4, JAG1, FLNA, TGFB2	794	31	10723	3.92082	0.994713	0.122835	2.6693
UP_SEQ_FEATURE	domain:EGF-like 7; calcium-binding	7	0.00508359	0.00236691	LTBP1, SVEP1, LTBP3, LTBP4, SCUBE1, FBN1, JAG1	814	20	11138	4.78907	0.99493	0.213532	4.04212
GOTERM_MF_DIRECT	GO:0004714~transmembrane receptor protein tyrosine kinase activity	9	0.00653604	0.00567429	FGFR2, TYRO3, RET, FGFR3, NTRK2, MERTK, EPHB1, CSF1R, EPHB2	761	38	10304	3.20686	0.995407	0.339058	8.54025
GOTERM_BP_DIRECT	GO:0031077~post-embryonic camera-type eye development	4	0.00290491	0.00152305	BCL11B, VEGFA, FZD5, KLF4	794	4	10723	13.505	0.995567	0.1238	2.75774
GOTERM_BP_DIRECT	GO:0016486~peptide hormone processing	5	0.00363113	0.00163254	ECE1, CHST8, SCG5, PCSK6, PCSK5	794	8	10723	8.44065	0.996998	0.129159	2.95319
GOTERM_BP_DIRECT	GO:0060174~limb bud formation	5	0.00363113	0.00163254	FGFR2, PLXNA2, SOX11, SOX4, SEMA3C	794	8	10723	8.44065	0.996998	0.129159	2.95319
UP_SEQ_FEATURE	domain:EGF-like 14; calcium-binding	5	0.00363113	0.00263734	NOTCH3, LTBP1, LTBP4, FBN1, JAG1	814	9	11138	7.60169	0.99723	0.225893	4.49401
KEGG_PATHWAY	mmu04512:ECM-receptor interaction	10	0.00726227	0.0254996	LAMA1, NPNT, TNC, COL3A1, COL6A2, ITGA11, ITGB5, COL6A1, ITGA4, THBS1	350	55	4454	2.31377	0.998071	0.406021	28.3834
GOTERM_MF_DIRECT	GO:0004860~protein kinase inhibitor activity	9	0.00653604	0.00668827	LRRC4, FLRT3, TESC, FLRT1, RTN4RL1, NCK1, RTN4R, CISH, TRIB2	761	39	10304	3.12463	0.99825	0.36457	9.99251
GOTERM_BP_DIRECT	GO:0010862~positive regulation of pathway-restricted SMAD protein phosphorylation	9	0.00653604	0.00183949	DAB2, BMP2, ACVRL1, GDF1, TGFB3, BMP7, ENG, TGFB2, BMP6	794	32	10723	3.79829	0.998563	0.141199	3.32161
GOTERM_CC_DIRECT	GO:0046658~anchored component of plasma membrane	6	0.00435736	0.0135102	GPC3, RTN4RL1, MDGA1, EFNA5, GAS1, NRN1	849	20	11424	4.03675	0.998708	0.173077	17.7384
GOTERM_BP_DIRECT	GO:0008284~positive regulation of cell proliferation	40	0.0290491	0.00187977	FGFR2, WNT5A, FGF18, GCNT2, FGFR3, PTGS2, TNC, PTH1R, SOX4, CNTFR, NMB, CXCR2, GLI2, TSPYL5, TGFB2, EDNRB, BCL2, PRKRA, THBS1, FGFBP1, SCX, CSF1R, SRPK2, NTF3, SOX11, EFNB2, GAS1, KITL, HES1, CCND1, WNT7B, PLA2G4A, SFRP1, ID2, SLC25A33, ETS1, VEGFA, NTRK2, PBX1, BAMBI	794	326	10723	1.65706	0.998755	0.141028	3.39316
GOTERM_BP_DIRECT	GO:0007154~cell communication	7	0.00508359	0.00188669	FRAS1, CTSL, DLL4, GJA1, JAG1, GJB2, GJC1	794	19	10723	4.97554	0.998786	0.138594	3.40545
GOTERM_CC_DIRECT	GO:0030018~Z disc	14	0.0101672	0.0138413	CRYAB, PDLIM3, LDB3, SYNPO2, NEXN, MYL9, DMD, PDE4B, FHOD3, RYR2, SYNM, FBXO32, PPP3CA, SYNPO	849	89	11424	2.11665	0.998904	0.172482	18.1339
SMART	SM00219:TyrKc	11	0.0079885	0.023089	FGFR2, FRK, TYRO3, RET, FGFR3, NTRK2, JAK3, MERTK, EPHB1, CSF1R, EPHB2	549	57	6322	2.22229	0.998909	0.330509	26.7191
INTERPRO	IPR017948:Transforming growth factor beta, conserved site	6	0.00435736	0.0051656	BMP2, GDF1, TGFB3, BMP7, TGFB2, BMP6	874	16	11604	4.97883	0.998996	0.211841	8.13242
UP_KEYWORDS	Hearing	5	0.00363113	0.0204314	COCH, MYO6, CLIC5, CDH23, GJB2	903	15	12297	4.53931	0.999028	0.184539	24.4682
UP_SEQ_FEATURE	domain:EGF-like 5	8	0.00580982	0.00327805	MATN2, NOTCH3, DLL4, SCUBE1, TNC, DLK1, SLIT1, SLIT2	814	28	11138	3.90944	0.999339	0.26294	5.55667
UP_SEQ_FEATURE	domain:EGF-like 6	8	0.00580982	0.00327805	MATN2, DLL4, SCUBE1, TNC, FBN1, DLK1, SLIT1, SLIT2	814	28	11138	3.90944	0.999339	0.26294	5.55667
UP_SEQ_FEATURE	domain:Ig-like C2-type 3	11	0.0079885	0.00333791	FGFR2, ALCAM, NCAM1, IGSF8, FGFR3, IGLON5, IGSF3, CNTN2, MCAM, BOC, CSF1R	814	51	11138	2.95125	0.999422	0.257876	5.65538
GOTERM_CC_DIRECT	GO:0030426~growth cone	18	0.0130721	0.0156386	CDK5R1, NRP1, KATNB1, RTN4R, DPYSL3, CXADR, SHANK2, FLNA, NCAM1, APP, RAC3, MAPT, NTRK2, CALM3, RAPGEF3, BOC, NEFL, DBN1	849	130	11424	1.86311	0.999551	0.18805	20.2499
GOTERM_CC_DIRECT	GO:0032589~neuron projection membrane	3	0.00217868	0.0156968	KCNC1, UNC5A, NRADD	849	3	11424	13.4558	0.999563	0.184207	20.3175
UP_SEQ_FEATURE	domain:TB 3	4	0.00290491	0.00346519	LTBP1, LTBP3, LTBP4, FBN1	814	5	11138	10.9464	0.999565	0.257493	5.86495
UP_SEQ_FEATURE	domain:TB 2	4	0.00290491	0.00346519	LTBP1, LTBP3, LTBP4, FBN1	814	5	11138	10.9464	0.999565	0.257493	5.86495
UP_SEQ_FEATURE	domain:TB 1	4	0.00290491	0.00346519	LTBP1, LTBP3, LTBP4, FBN1	814	5	11138	10.9464	0.999565	0.257493	5.86495
GOTERM_MF_DIRECT	GO:0030552~cAMP binding	6	0.00435736	0.00821945	HCN2, PRKAR2A, PDE4B, PDE4D, RAPGEF3, HCN4	761	18	10304	4.51336	0.999593	0.405786	12.1447
GOTERM_CC_DIRECT	GO:0042383~sarcolemma	13	0.00944095	0.0158796	ATP1B1, ADCY5, ATP1A3, ANXA6, CHRM4, SLC2A5, DMD, COL6A2, COL6A1, RYR2, SYNM, PPP3CA, ABCC8	849	81	11424	2.15958	0.999601	0.181845	20.5297
GOTERM_MF_DIRECT	GO:0005160~transforming growth factor beta receptor binding	7	0.00508359	0.00830466	BMP2, GDF1, TGFB3, SMAD3, BMP7, TGFB2, BMP6	761	25	10304	3.79122	0.999625	0.389247	12.263
UP_KEYWORDS	cAMP	6	0.00435736	0.0232981	HCN2, PRKAR2A, PDE4D, PDE8B, RAPGEF3, HCN4	903	23	12297	3.55251	0.999637	0.202527	27.4182
GOTERM_BP_DIRECT	GO:0001656~metanephros development	8	0.00580982	0.00222991	WNT4, ID2, BCL2, FBN1, SIX2, ID3, WT1, SLIT2	794	26	10723	4.1554	0.999642	0.158464	4.01306
GOTERM_BP_DIRECT	GO:0050729~positive regulation of inflammatory response	9	0.00653604	0.00227346	WNT5A, TNFRSF1A, PLA2G4A, ETS1, TGM2, CX3CL1, ADAM8, GPRC5B, CCL7	794	33	10723	3.68319	0.999694	0.158153	4.08989
GOTERM_BP_DIRECT	GO:0043524~negative regulation of neuron apoptotic process	19	0.0137983	0.00227931	TYRO3, NES, NRP1, NTF3, ADORA2A, TGFB3, PRKCG, CNTFR, UBE2V2, MDK, KDM2B, UNC5B, BTG2, BHLHB9, BCL2, NTRK2, VEGFA, ADAM8, NEFL	794	117	10723	2.19313	0.9997	0.155495	4.10021
INTERPRO	IPR013320:Concanavalin A-like lectin/glucanase, subgroup	19	0.0137983	0.00614805	NRP2, SVEP1, NRP1, NPNT, MDGA1, CLSTN1, SLIT1, SLIT2, GAS6, MID2, LAMA1, NPTX1, TRIM36, FAT3, PAPPA, CNTNAP2, COL12A1, RYR2, THBS1	874	126	11604	2.00207	0.999731	0.239684	9.60707
GOTERM_CC_DIRECT	GO:0048786~presynaptic active zone	6	0.00435736	0.0166736	SYP, ADORA2A, NTRK2, BSN, SHANK2, RIMS3	849	21	11424	3.84452	0.999731	0.185804	21.4452
GOTERM_CC_DIRECT	GO:0001527~microfibril	4	0.00290491	0.0171998	LTBP1, FBN1, THSD4, ADAMTS10	849	8	11424	6.72792	0.999793	0.186919	22.0465
BIOCARTA	m_erythPathway:Erythrocyte Differentiation Pathway	3	0.00217868	0.0604915	TGFB3, KITL, TGFB2	67	6	941	7.02239	0.999806	0.999806	51.9746
GOTERM_BP_DIRECT	GO:0048791~calcium ion-regulated exocytosis of neurotransmitter	6	0.00435736	0.00248842	SYT11, SYT8, DOC2G, SYT13, SYT7, RIMS3	794	14	10723	5.78787	0.999858	0.165366	4.46831
UP_SEQ_FEATURE	domain:EGF-like 5; calcium-binding	7	0.00508359	0.00401865	LTBP1, SVEP1, LTBP3, LTBP4, NPNT, FBN1, JAG1	814	22	11138	4.3537	0.999874	0.282928	6.7711
INTERPRO	IPR000421:Coagulation factor 5/8 C-terminal type domain	5	0.00363113	0.00683962	NRP2, NRP1, CPXM1, F8, CNTNAP2	874	11	11604	6.03495	0.999894	0.255553	10.6318
KEGG_PATHWAY	mmu04971:Gastric acid secretion	8	0.00580982	0.0377788	ATP1B1, GNAI1, ADCY5, ATP1A3, CALM3, KCNJ10, PRKCG, CAR2	350	41	4454	2.48307	0.99991	0.511735	39.2093
UP_KEYWORDS	Cell projection	50	0.0363113	0.0277829	CPEB3, MYO7B, ADCY5, CLSTN1, DYNC2LI1, CTTNBP2, UNC5A, MAPT, AIF1L, CNTNAP2, NEURL1A, WDR35, ARC, MYO6, ARHGEF6, ARHGEF5, LDB3, PRKCG, PKD2L1, IFT88, DBN1, BBS9, CTNND2, WDR60, STARD10, AFAP1L1, EPHB1, EPHB2, ALCAM, RAC3, PLEKHG6, RASGRP2, AVIL, PSTPIP1, TCTN1, SYNPO, AATK, AGBL2, FLRT3, TESC, FLRT1, MYO1G, DPYSL3, KITL, SHANK2, ELFN1, PROM2, CNIH2, GAMT, ADAM22	903	506	12297	1.34565	0.999923	0.231241	31.8201
GOTERM_MF_DIRECT	GO:0030165~PDZ domain binding	14	0.0101672	0.00995906	HCN2, NKD1, CADM1, MPP3, GRIK5, CASK, GJA1, ARHGAP29, CXADR, SLC9A3R2, SDC2, ADRB1, SLC22A5, CRIM1	761	86	10304	2.2042	0.999923	0.427058	14.5313
INTERPRO	IPR003938:Potassium channel, voltage-dependent, EAG/ELK/ERG	4	0.00290491	0.00714085	HCN2, KCNH2, HCN4, KCNH3	874	6	11604	8.85126	0.999929	0.258091	11.0747
INTERPRO	IPR018378:C-type lectin, conserved site	4	0.00290491	0.00714085	MRC2, ACAN, COLEC12, VCAN	874	6	11604	8.85126	0.999929	0.258091	11.0747
GOTERM_BP_DIRECT	GO:0007626~locomotory behavior	12	0.00871472	0.0026843	PAK6, APP, B4GALT2, MYO6, ADORA2A, ADCY5, CHRNA4, SLC22A5, SEPP1, GPRC5B, MEIS1, CDH23	794	57	10723	2.84317	0.999929	0.173959	4.8119
GOTERM_BP_DIRECT	GO:0018149~peptide cross-linking	5	0.00363113	0.00276731	COL3A1, TGM1, TGM2, DSP, THBS1	794	9	10723	7.5028	0.999947	0.175654	4.95716
GOTERM_BP_DIRECT	GO:0033280~response to vitamin D	5	0.00363113	0.00276731	ALPL, PTGS2, STC2, STC1, BMP7	794	9	10723	7.5028	0.999947	0.175654	4.95716
GOTERM_BP_DIRECT	GO:0048846~axon extension involved in axon guidance	5	0.00363113	0.00276731	ALCAM, NRP2, NRP1, SLIT1, SLIT2	794	9	10723	7.5028	0.999947	0.175654	4.95716
GOTERM_BP_DIRECT	GO:0045766~positive regulation of angiogenesis	14	0.0101672	0.0027682	WNT5A, ACVRL1, CXCR2, CX3CL1, PRKD1, VEGFB, TNFRSF1A, ETS1, GATA6, F3, VEGFA, RAPGEF3, THBS1, ENG	794	74	10723	2.55501	0.999947	0.172637	4.95872
INTERPRO	IPR020894:Cadherin conserved site	7	0.00508359	0.00740465	FAT3, CDH2, PCDH7, CDH4, DCHS1, CDH23, PCDH18	874	24	11604	3.87243	0.99995	0.259342	11.4608
GOTERM_BP_DIRECT	GO:0045596~negative regulation of cell differentiation	9	0.00653604	0.00278383	NOTCH3, HES1, WNT4, HMGB3, FST, SIX2, BCL6, SKI, JAG1	794	34	10723	3.57486	0.99995	0.170546	4.98604
GOTERM_MF_DIRECT	GO:0005178~integrin binding	12	0.00871472	0.0104425	DAB2, WISP1, NPNT, SEMA7A, COL3A1, FBN1, ANP32A, ITGB5, CX3CL1, THBS1, ADAM8, CXADR	761	68	10304	2.38943	0.999951	0.424027	15.1836
UP_SEQ_FEATURE	domain:EGF-like 6; calcium-binding	6	0.00435736	0.00453443	NOTCH3, LTBP1, SVEP1, LTBP3, LTBP4, JAG1	814	16	11138	5.13114	0.99996	0.303687	7.60818
GOTERM_MF_DIRECT	GO:0005267~potassium channel activity	8	0.00580982	0.0107274	HCN2, KCNC1, KCNQ5, KCNJ10, KCNH2, HCN4, KCNH3, ABCC8	761	34	10304	3.1859	0.999963	0.4155	15.566
KEGG_PATHWAY	mmu04978:Mineral absorption	6	0.00435736	0.0413806	ATP1B1, MT2, ATP1A3, CYBRD1, SLC39A4, SLC40A1	350	25	4454	3.05417	0.999964	0.518338	42.0855
GOTERM_BP_DIRECT	GO:0007179~transforming growth factor beta receptor signaling pathway	13	0.00944095	0.00295745	BMP2, ACVRL1, LTBP1, GCNT2, LTBP3, LTBP4, COL3A1, TGFB3, SMAD3, ITGB5, BAMBI, ENG, TGFB2	794	66	10723	2.66008	0.999973	0.177155	5.28908
UP_KEYWORDS	Metalloprotease	12	0.00871472	0.0311748	AGBL2, ECE1, ADAMTS8, ECEL1, PAPPA, CPXM1, ADAMTS10, MMP17, MME, MMP28, ADAM8, ADAMTS2	903	80	12297	2.04269	0.999976	0.249944	34.9835
SMART	SM00137:MAM	4	0.00290491	0.0366176	NRP2, NRP1, NPNT, MDGA1	549	9	6322	5.11799	0.999981	0.454017	39.1313
UP_KEYWORDS	Chondrogenesis	4	0.00290491	0.0319628	WNT5A, BMP2, BMP7, BMP6	903	10	12297	5.44718	0.999982	0.249664	35.6987
UP_KEYWORDS	cAMP-binding	4	0.00290491	0.0319628	HCN2, PRKAR2A, RAPGEF3, HCN4	903	10	12297	5.44718	0.999982	0.249664	35.6987
KEGG_PATHWAY	mmu04080:Neuroactive ligand-receptor interaction	11	0.0079885	0.0444182	EDNRB, ADRB1, CHRM4, ADORA2A, GRIK3, PTH1R, DRD4, GRIK5, CHRNA4, GPR50, GHR	350	70	4454	1.99976	0.999983	0.519542	44.413
GOTERM_BP_DIRECT	GO:0009612~response to mechanical stimulus	11	0.0079885	0.00314951	ACTA1, BTG2, ETS1, TNC, COL3A1, PPARG, FOSB, IGFBP2, GLI2, THBS1, KALRN	794	50	10723	2.97111	0.999987	0.184452	5.62326
INTERPRO	IPR008160:Collagen triple helix repeat	8	0.00580982	0.00849217	COL23A1, COL7A1, COL3A1, COL6A2, COL12A1, COL6A1, COLEC12, SCARA5	874	32	11604	3.31922	0.999988	0.284207	13.0363
GOTERM_MF_DIRECT	GO:0008237~metallopeptidase activity	14	0.0101672	0.0120039	AGBL2, ECE1, ADAMTS8, ECEL1, PAPPA, ADAMTSL3, ADAM23, CPXM1, ADAMTS10, MMP17, MME, ADAM22, ADAM8, ADAMTS2	761	88	10304	2.1541	0.999989	0.435165	17.2591
GOTERM_MF_DIRECT	GO:0042803~protein homodimerization activity	58	0.0421212	0.0121533	SLC27A1, SCHIP1, PTGS2, CADM1, SLC6A4, GSTM5, TGFB2, PRKAR2A, GSTM4, BHLHB9, DMRTC1A, GHR, SPATA24, CTBP2, COL23A1, STC2, CRYAB, ZHX2, QDPR, SLIT2, FLNA, HES1, VEGFB, RAB11FIP4, DGAT2, VEGFA, KCNH2, EXT1, AOC3, FGFR2, RAP1GAP, ABCD1, NRN1, GCH1, ANXA6, GLIPR2, ECE1, BCL2, PRKRA, IDH1, TCF4, CSF1R, FLRT3, MAF, CEBPA, TESC, BMP2, SYT11, SMAD3, NPR3, MID2, PEX11A, PYGL, ID1, FAAH, NTRK2, GAMT, ENG	761	574	10304	1.36816	0.999991	0.423529	17.4551
GOTERM_MF_DIRECT	GO:0005546~phosphatidylinositol-4,5-bisphosphate binding	9	0.00653604	0.0121564	TULP1, ANXA8, DAB2, PFN2, STXBP6, MYO1B, MYO1G, ASAP1, SYT7	761	43	10304	2.83397	0.999991	0.408995	17.4592
SMART	SM00198:SCP	3	0.00217868	0.0399902	GLIPR2, CRISPLD2, GLIPR1	549	4	6322	8.63661	0.999993	0.465922	41.9067
UP_KEYWORDS	Protease inhibitor	7	0.00508359	0.0351562	APP, GPC3, CST6, COL7A1, TFPI, SPINT1, TIMP3	903	34	12297	2.80369	0.999994	0.265332	38.5231
SMART	SM00406:IGv	7	0.00508359	0.0407626	NCAM1, VSIG10, MPZL2, IGSF3, ACAN, VCAN, CXADR	549	30	6322	2.68695	0.999995	0.455345	42.5257
GOTERM_CC_DIRECT	GO:0005925~focal adhesion	38	0.0275966	0.0249844	NRP1, LIMS2, FHL1, TNC, ITGA11, GJA1, CASK, MME, ITGB5, CDH2, ALCAM, ANXA6, PRKAR2A, DAB2, STARD8, AIF1L, TGM2, CLASP1, NOX4, FLRT3, FLRT1, EFNB2, MRC2, SYNPO2, ITGA4, TLE2, NEXN, MCAM, SLC9A3R2, FLNA, TNS4, CYBA, RND3, SH3KBP1, IRF2, MARCKS, TGFB1I1, ENG	849	358	11424	1.42827	0.999996	0.255159	30.4564
INTERPRO	IPR020635:Tyrosine-protein kinase, catalytic domain	11	0.0079885	0.00933281	FGFR2, FRK, TYRO3, RET, FGFR3, NTRK2, JAK3, MERTK, EPHB1, CSF1R, EPHB2	874	57	11604	2.56221	0.999996	0.300308	14.236
GOTERM_BP_DIRECT	GO:0045746~negative regulation of Notch signaling pathway	8	0.00580982	0.00352586	BEND6, OVOL2, NRARP, DLL4, BCL6, NEURL1A, DLK1, BMP7	794	28	10723	3.85858	0.999996	0.200865	6.27484
GOTERM_BP_DIRECT	GO:0060907~positive regulation of macrophage cytokine production	4	0.00290491	0.00359799	WNT5A, SEMA7A, GPRC5B, CD74	794	5	10723	10.804	0.999997	0.201328	6.39923
UP_KEYWORDS	Voltage-gated channel	9	0.00653604	0.0380254	HCN2, KCNC1, KCNQ5, CACNA2D1, CLIC5, KCNJ10, KCNH2, HCN4, KCNH3	903	53	12297	2.31248	0.999998	0.277938	40.9622
GOTERM_BP_DIRECT	GO:0016477~cell migration	23	0.0167032	0.00368743	WNT5A, ARC, VAV3, NRP1, EFNB2, SIX2, CDH2, ITGA4, MDK, SDC2, DCHS1, TGFB2, HES1, NCK2, NCK1, GPC6, VEGFA, ST14, PSTPIP1, SH3KBP1, JAK3, THBS1, BAMBI	794	161	10723	1.92929	0.999998	0.202626	6.55327
UP_KEYWORDS	Sushi	5	0.00363113	0.0384648	SVEP1, PAPPA, SUSD2, ACAN, VCAN	903	18	12297	3.78276	0.999998	0.2749	41.3277
UP_KEYWORDS	Mitogen	5	0.00363113	0.0384648	VEGFB, VEGFA, TGFB3, MDK, TGFB2	903	18	12297	3.78276	0.999998	0.2749	41.3277
KEGG_PATHWAY	mmu04310:Wnt signaling pathway	15	0.0108934	0.053097	WNT5A, NKD1, CTBP2, NKD2, PRKCG, FZD5, SFRP5, GPC4, WNT4, WNT7B, CCND1, SFRP1, RAC3, PPP3CA, BAMBI	350	112	4454	1.70434	0.999998	0.561852	50.5961
UP_KEYWORDS	Angiogenesis	13	0.00944095	0.038777	VEGFB, PRKD1, NRP1, ACVRL1, VAV3, UNC5B, DLL4, VEGFA, EFNB2, RAPGEF3, FZD5, TNFAIP2, ENG	903	93	12297	1.90358	0.999998	0.271225	41.5862
KEGG_PATHWAY	mmu00260:Glycine, serine and threonine metabolism	6	0.00435736	0.0553582	ALAS1, ALAS2, PHGDH, PGAM2, GAMT, AOC3	350	27	4454	2.82794	0.999999	0.55545	52.0994
GOTERM_MF_DIRECT	GO:0030276~clathrin binding	7	0.00508359	0.0146319	DAB2, TOM1L2, SYT11, SYT8, DOC2G, SYT13, SYT7	761	28	10304	3.38502	0.999999	0.454614	20.645
GOTERM_BP_DIRECT	GO:0030336~negative regulation of cell migration	14	0.0101672	0.00396118	WNT4, ACVRL1, SFRP1, BCL2, SCAI, ACAN, STC1, DPYSL3, CX3CL1, ENG, CHRD, SLIT2, KLF4, IGFBP5	794	77	10723	2.45546	0.999999	0.212705	7.02322
UP_SEQ_FEATURE	nucleotide phosphate-binding region:cAMP	4	0.00290491	0.00655516	HCN2, PDE4D, RAPGEF3, HCN4	814	6	11138	9.12203	1	0.396934	10.8199
UP_KEYWORDS	Muscle protein	6	0.00435736	0.0439355	ACTG2, ACTA1, TAGLN, ACTA2, PHKA1, MYL9	903	27	12297	3.02621	1	0.296073	45.7065
KEGG_PATHWAY	mmu04921:Oxytocin signaling pathway	14	0.0101672	0.0609329	CACNA2D1, PTGS2, GNAI1, ADCY5, PRKAG2, PRKCG, MYL9, PLA2G4A, CCND1, RYR2, CALM3, PPP3CA, PRKAA2, CAMK1D	350	104	4454	1.71308	1	0.570542	55.6271
INTERPRO	IPR001611:Leucine-rich repeat	18	0.0130721	0.0113687	LRRC4, FLRT3, FLRT1, RTN4RL1, LRRN4, LRRN2, RTN4R, TPBG, SLIT1, SLIT2, LRRC10B, ELFN1, ELFN2, SLITRK4, LINGO3, LRCH2, NTRK2, ANP32A	874	124	11604	1.92729	1	0.345163	17.0775
GOTERM_BP_DIRECT	GO:0060349~bone morphogenesis	7	0.00508359	0.0042864	FGFR2, CDX1, FGFR3, LTBP3, CYP26B1, LTF, SKI	794	22	10723	4.29706	1	0.224708	7.57863
SMART	SM00282:LamG	6	0.00435736	0.0513478	LAMA1, FAT3, CNTNAP2, SLIT1, GAS6, SLIT2	549	24	6322	2.87887	1	0.519516	50.416
GOTERM_BP_DIRECT	GO:0050678~regulation of epithelial cell proliferation	5	0.00363113	0.00434413	FGFR2, HES1, EDNRB, TACSTD2, SMAD3	794	10	10723	6.75252	1	0.224092	7.67688
GOTERM_MF_DIRECT	GO:0005086~ARF guanyl-nucleotide exchange factor activity	6	0.00435736	0.0162436	NCK2, NCK1, PSD3, PSD4, IQSEC2, AMPH	761	21	10304	3.86859	1	0.475614	22.6571
GOTERM_MF_DIRECT	GO:0001968~fibronectin binding	6	0.00435736	0.0162436	TNC, VEGFA, ITGA4, THBS1, IGFBP3, IGFBP5	761	21	10304	3.86859	1	0.475614	22.6571
GOTERM_CC_DIRECT	GO:0048471~perinuclear region of cytoplasm	54	0.0392163	0.0317657	LTBP1, PPARG, NCS1, CNP, PRKAR2A, APP, DAB2, PTGES, PDE4B, MT2, ANP32A, NEURL1A, RAPGEF3, MYO6, STC2, LDB3, PRKCG, PRKCE, FLNA, RAB11FIP4, MAGEE1, DGAT2, VAMP5, RAB15, NPPB, KCNH2, RASD1, DBN1, KALRN, CDK5R1, FGFR3, ABCD1, CX3CL1, ANXA6, PPP1R16B, ECE1, RAC3, BCL2, PRKRA, APBA3, PSTPIP1, HCN4, EHD2, AATK, NOX4, ICA1, FLRT1, MYO1B, SYT11, RNF207, FZD5, PLA2G4A, UACA, PKP4	849	553	11424	1.31395	1	0.307263	37.0864
GOTERM_BP_DIRECT	GO:0007165~signal transduction	58	0.0421212	0.00443074	GNAZ, FGF18, GDF1, ACVRL1, PLXNA2, PPARG, GJA1, CXCR2, NRADD, EDNRB, WNT4, ARHGAP20, WISP1, UNC5B, UNC5A, STARD8, CHRNA4, PDE8B, ERAS, ARHGAP9, MRGPRE, PDE4D, ARHGAP29, IRS1, ARRDC2, SIGIRR, CHRM4, ADRB1, GPR50, RASD1, GRB14, MAVS, WNT5A, ZFAND6, SPOCK2, ADORA2A, GNAI1, DRD4, PTH1R, GPRC5B, SOX8, CD74, SMOC2, TNFRSF1A, BCL11B, ZFP217, FRMPD1, FZD5, GAS6, STAT2, PEX11A, RASSF4, TOM1L2, ULK1, RGS5,…	794	544	10723	1.43988	1	0.224787	7.82411
UP_KEYWORDS	Potassium	9	0.00653604	0.0460017	HCN2, KCNC1, KCNQ5, ATP1B1, ATP1A3, KCNJ10, KCNH2, HCN4, KCNH3	903	55	12297	2.22839	1	0.30206	47.28
INTERPRO	IPR002223:Proteinase inhibitor I2, Kunitz metazoa	4	0.00290491	0.011802	APP, COL7A1, TFPI, SPINT1	874	7	11604	7.58679	1	0.348005	17.6707
INTERPRO	IPR020901:Proteinase inhibitor I2, Kunitz, conserved site	4	0.00290491	0.011802	APP, COL7A1, TFPI, SPINT1	874	7	11604	7.58679	1	0.348005	17.6707
GOTERM_MF_DIRECT	GO:0005539~glycosaminoglycan binding	4	0.00290491	0.0169002	SMOC2, CRISPLD2, SPOCK2, ENG	761	8	10304	6.77004	1	0.475322	23.4629
GOTERM_MF_DIRECT	GO:0017124~SH3 domain binding	15	0.0108934	0.0172764	KHDRBS3, DRD4, GRIK5, ASAP1, GJA1, DPYSL3, PRKCE, SHANK2, SH3BGRL, CBLC, CTTNBP2, CYBA, MAPT, SH3BGR, SH3KBP1	761	102	10304	1.99119	1	0.469581	23.9211
GOTERM_BP_DIRECT	GO:0071356~cellular response to tumor necrosis factor	12	0.00871472	0.00464545	ZFAND6, CEBPA, CYBA, SFRP1, NPNT, RORA, ANKRD1, SGMS1, CX3CL1, THBS1, DBN1, CCL7	794	61	10723	2.65673	1	0.231064	8.18817
KEGG_PATHWAY	mmu04550:Signaling pathways regulating pluripotency of stem cells	15	0.0108934	0.067533	FGFR2, WNT5A, BMP2, FGFR3, PAX6, SMAD3, FZD5, MEIS1, WNT4, WNT7B, ID2, ID1, ID3, JAK3, KLF4	350	116	4454	1.64557	1	0.589582	59.4932
GOTERM_CC_DIRECT	GO:0044295~axonal growth cone	6	0.00435736	0.0340831	FLRT3, MAPT, RTN4R, BOC, DBN1, AATK	849	25	11424	3.2294	1	0.319816	39.2138
GOTERM_BP_DIRECT	GO:0070374~positive regulation of ERK1 and ERK2 cascade	16	0.0116196	0.00486474	FGFR2, NOX4, FGF18, BMP2, NRP1, FGFR3, GCNT2, NPNT, CX3CL1, CCL7, GAS6, CD74, GLIPR2, SEMA7A, VEGFA, CSF1R	794	97	10723	2.22764	1	0.237293	8.55857
GOTERM_BP_DIRECT	GO:0051291~protein heterooligomerization	13	0.00944095	0.00487375	TMEM120A, TNFRSF1A, PRKAR2A, ACVRL1, CLDN3, RIPK3, CHRNA4, CDH2, PRKAA2, KCNH2, IRS1, GCHFR, GCH1	794	70	10723	2.50808	1	0.234486	8.57375
UP_KEYWORDS	Potassium channel	6	0.00435736	0.0503809	HCN2, KCNC1, KCNQ5, KCNH2, HCN4, KCNH3	903	28	12297	2.91813	1	0.320219	50.4764
GOTERM_BP_DIRECT	GO:0048812~neuron projection morphogenesis	11	0.0079885	0.00489196	WNT5A, WNT7B, ADORA2A, DMD, ZSWIM6, GJA1, BRSK1, BMP7, NEFL, SLIT1, SLIT2	794	53	10723	2.80293	1	0.232138	8.60445
KEGG_PATHWAY	mmu04510:Focal adhesion	19	0.0137983	0.0701753	VAV3, TNC, COL3A1, ITGA11, ITGB5, PRKCG, ITGA4, FLNA, MYL9, VEGFB, PAK6, LAMA1, CCND1, RAC3, BCL2, VEGFA, COL6A2, COL6A1, THBS1	350	159	4454	1.52068	1	0.585378	60.9518
INTERPRO	IPR001111:Transforming growth factor-beta, N-terminal	5	0.00363113	0.0131301	BMP2, TGFB3, BMP7, TGFB2, BMP6	874	13	11604	5.1065	1	0.37101	19.4643
UP_SEQ_FEATURE	domain:EGF-like 8; calcium-binding	6	0.00435736	0.00787313	NOTCH3, LTBP1, LTBP3, LTBP4, SCUBE1, FBN1	814	18	11138	4.56102	1	0.444314	12.8576
UP_SEQ_FEATURE	domain:Peptidase M12B	6	0.00435736	0.00787313	ADAMTS8, ADAM23, ADAMTS10, ADAM22, ADAM8, ADAMTS2	814	18	11138	4.56102	1	0.444314	12.8576
UP_SEQ_FEATURE	domain:EGF-like 7	6	0.00435736	0.00787313	MATN2, NOTCH3, DLL4, TNC, SLIT1, SLIT2	814	18	11138	4.56102	1	0.444314	12.8576
UP_SEQ_FEATURE	domain:Disintegrin	6	0.00435736	0.00787313	ADAMTS8, ADAM23, ADAMTS10, ADAM22, ADAM8, ADAMTS2	814	18	11138	4.56102	1	0.444314	12.8576
GOTERM_BP_DIRECT	GO:0071560~cellular response to transforming growth factor beta stimulus	10	0.00726227	0.00499613	NOX4, WNT5A, DAB2, WNT4, ACVRL1, SFRP1, ID1, ANKRD1, SCX, DBN1	794	45	10723	3.00112	1	0.233375	8.77983
KEGG_PATHWAY	mmu05200:Pathways in cancer	32	0.0232393	0.0710624	FGFR2, WNT5A, FGF18, FGFR3, PTGS2, GNAI1, ADCY5, PPARG, TGFB3, GLI2, TGFB2, EDNRB, WNT4, RAC3, BCL2, RASGRP2, CSF2RA, CSF1R, CEBPA, RET, BMP2, CTBP2, SMAD3, PRKCG, FZD5, KITL, VEGFB, CBLC, LAMA1, CCND1, WNT7B, VEGFA	350	303	4454	1.34397	1	0.572356	61.4306
KEGG_PATHWAY	mmu04151:PI3K-Akt signaling pathway	26	0.0188819	0.0716879	FGFR2, FGF18, FGFR3, TNC, EFNA2, COL3A1, ITGA11, ITGB5, BCL2, COL6A2, COL6A1, PRKAA2, THBS1, PPP2R2C, CSF1R, GHR, SGK2, ITGA4, KITL, IRS1, VEGFB, LAMA1, CCND1, VEGFA, EFNA5, JAK3	350	236	4454	1.40199	1	0.558801	61.7649
UP_KEYWORDS	Hemostasis	4	0.00290491	0.052528	ANXA8, F3, F8, TFPI	903	12	12297	4.53931	1	0.325732	51.977
UP_KEYWORDS	Blood coagulation	4	0.00290491	0.052528	ANXA8, F3, F8, TFPI	903	12	12297	4.53931	1	0.325732	51.977
GOTERM_CC_DIRECT	GO:0098793~presynapse	8	0.00580982	0.0373974	AP1S2, SYT11, SLC6A4, SYT8, BSN, DOC2G, SYT13, KCNJ10	849	43	11424	2.50341	1	0.339117	42.1403
GOTERM_CC_DIRECT	GO:0016328~lateral plasma membrane	8	0.00580982	0.0373974	OCLN, NKD2, CLDN4, CLDN3, TACSTD2, NSG1, GJA1, GJB2	849	43	11424	2.50341	1	0.339117	42.1403
INTERPRO	IPR001791:Laminin G domain	8	0.00580982	0.0139455	LAMA1, FAT3, CNTNAP2, COL12A1, THBS1, SLIT1, GAS6, SLIT2	874	35	11604	3.03472	1	0.38122	20.5473
SMART	SM00215:VWC_out	3	0.00217868	0.0628698	FRAS1, JAG1, CRIM1	549	5	6322	6.90929	1	0.577615	57.8579
GOTERM_MF_DIRECT	GO:0005216~ion channel activity	11	0.0079885	0.0198985	HCN2, KCNC1, KCNQ5, GRIK3, GRIK5, CHRNA4, RYR2, KCNH2, HCN4, KCNH3, GJC1	761	65	10304	2.2914	1	0.505502	27.0439
UP_SEQ_FEATURE	domain:EGF-like 2; calcium-binding	8	0.00580982	0.00860254	SVEP1, LTBP3, LTBP4, NPNT, SCUBE1, VCAN, THBS1, GAS6	814	33	11138	3.3171	1	0.462865	13.9665
GOTERM_BP_DIRECT	GO:0050873~brown fat cell differentiation	7	0.00508359	0.00544275	PEX11A, CEBPA, ALDH6A1, ADRB1, PTGS2, PPARG, METRNL	794	23	10723	4.11023	1	0.248227	9.52813
UP_SEQ_FEATURE	region of interest:Heparin-binding	5	0.00363113	0.00868205	FGFR2, NCAM1, LPL, APP, THBS1	814	12	11138	5.70127	1	0.455383	14.0865
UP_KEYWORDS	Collagen	7	0.00508359	0.0564514	COL23A1, COL7A1, COL3A1, COL6A2, COL12A1, COL6A1, COLEC12	903	38	12297	2.50857	1	0.339928	54.6109
GOTERM_BP_DIRECT	GO:0019221~cytokine-mediated signaling pathway	13	0.00944095	0.00548135	CEBPA, LRRC4, FLRT3, TNFRSF1A, FLRT1, RTN4RL1, F3, RTN4R, IL17RE, CX3CL1, JAK3, CISH, CSF1R	794	71	10723	2.47275	1	0.24662	9.59253
UP_KEYWORDS	Hormone	6	0.00435736	0.0573508	STC2, FBN1, NPPB, STC1, METRNL, PRL2A1	903	29	12297	2.8175	1	0.33862	55.1955
GOTERM_MF_DIRECT	GO:0017046~peptide hormone binding	5	0.00363113	0.0207974	EDNRB, PTH1R, NPR3, SLC40A1, GHR	761	15	10304	4.51336	1	0.508387	28.0866
KEGG_PATHWAY	mmu04925:Aldosterone synthesis and secretion	9	0.00653604	0.0804727	PRKD1, DAGLA, CYP11A1, ADCY5, CALM3, PRKCG, PRKCE, LIPE, CAMK1D	350	58	4454	1.97468	1	0.586347	66.1863
KEGG_PATHWAY	mmu04670:Leukocyte transendothelial migration	11	0.0079885	0.0814258	CYBA, OCLN, VAV3, CLDN4, CLDN3, GNAI1, PRKCG, RAPGEF3, ITGA4, CLDN23, MYL9	350	78	4454	1.79465	1	0.575313	66.6365
UP_KEYWORDS	Inflammatory response	9	0.00653604	0.0598917	PRKD1, SEMA7A, PSTPIP1, CHST2, IL17RE, BCL6, CCL7, CSF1R, CAMK1D	903	58	12297	2.11313	1	0.345248	56.8097
GOTERM_CC_DIRECT	GO:0030175~filopodium	10	0.00726227	0.0418899	ACTG2, ACTA1, MYO1B, ACTA2, DMD, MYO1G, RAPGEF3, CXADR, KITL, DBN1	849	63	11424	2.13585	1	0.365491	45.8982
UP_KEYWORDS	Actin-binding	22	0.015977	0.0609101	PHACTR1, MYO6, CLMN, MYO1B, MYO7B, MYO1G, SYNPO2, PXK, NEXN, FLNA, TNS4, PFN2, MIB2, DMD, CAPG, AIF1L, FHOD3, AVIL, MARCKS, DBN1, PLS3, SYNPO	903	200	12297	1.49797	1	0.34447	57.4413
INTERPRO	IPR018890:Uncharacterised protein family FAM171	3	0.00217868	0.016113	FAM171B, FAM171A2, FAM171A1	874	3	11604	13.2769	1	0.418031	23.3598
KEGG_PATHWAY	mmu05204:Chemical carcinogenesis	5	0.00363113	0.0881731	GSTM4, PTGS2, NAT2, ALDH3B2, GSTM5	350	22	4454	2.89221	1	0.590784	69.6688
GOTERM_BP_DIRECT	GO:0001658~branching involved in ureteric bud morphogenesis	8	0.00580982	0.00645109	BMP2, WNT4, GPC3, NPNT, BCL2, PBX1, WT1, DCHS1	794	31	10723	3.48517	1	0.28013	11.1963
GOTERM_BP_DIRECT	GO:0007157~heterophilic cell-cell adhesion via plasma membrane cell adhesion molecules	8	0.00580982	0.00645109	ALCAM, CADM1, CDH2, ITGA4, CXADR, MCAM, CDH4, DCHS1	794	31	10723	3.48517	1	0.28013	11.1963
SMART	SM00032:CCP	5	0.00363113	0.0761191	SVEP1, PAPPA, SUSD2, ACAN, VCAN	549	19	6322	3.03039	1	0.634007	65.1326
GOTERM_CC_DIRECT	GO:0005581~collagen trimer	7	0.00508359	0.0472498	COL23A1, COL7A1, COL3A1, COL6A2, COL12A1, COL6A1, COLEC12	849	36	11424	2.61641	1	0.395644	50.0844
INTERPRO	IPR002181:Fibrinogen, alpha/beta/gamma chain, C-terminal globular domain	4	0.00290491	0.017838	TNC, CNTNAP2, FIBCD1, ANGPTL2	874	8	11604	6.63844	1	0.442998	25.5312
INTERPRO	IPR001565:Synaptotagmin	4	0.00290491	0.017838	SYT11, SYT8, DOC2G, SYT7	874	8	11604	6.63844	1	0.442998	25.5312
INTERPRO	IPR017891:Insulin-like growth factor binding protein, N-terminal, Cys-rich conserved site	4	0.00290491	0.017838	WISP1, IGFBP2, IGFBP3, IGFBP5	874	8	11604	6.63844	1	0.442998	25.5312
UP_KEYWORDS	Wnt signaling pathway	17	0.0123459	0.0689848	WNT5A, NKD1, NKD2, TLE2, APCDD1, FZD5, HIC1, SFRP5, RNF43, DAB2, WNT4, WNT7B, WISP1, SFRP1, NXN, PRKAA2, TGFB1I1	903	146	12297	1.58565	1	0.375576	62.1553
SMART	SM00645:Pept_C1	4	0.00290491	0.0790076	CTSL, CTSR, CTSC, CTSF	549	12	6322	3.83849	1	0.63262	66.5557
UP_KEYWORDS	Notch signaling pathway	7	0.00508359	0.0694729	DTX4, NOTCH3, APP, DLL4, MIB2, NEURL1A, JAG1	903	40	12297	2.38314	1	0.372026	62.4241
UP_SEQ_FEATURE	domain:Fibronectin type-III 2	12	0.00871472	0.0108182	ATF7IP, NCAM1, TYRO3, COL7A1, TNC, CNTN2, COL12A1, CNTFR, MERTK, BOC, EPHB1, EPHB2	814	69	11138	2.37966	1	0.520511	17.2536
UP_SEQ_FEATURE	domain:Fibronectin type-III 1	12	0.00871472	0.0108182	ATF7IP, NCAM1, TYRO3, COL7A1, TNC, CNTN2, COL12A1, CNTFR, MERTK, BOC, EPHB1, EPHB2	814	69	11138	2.37966	1	0.520511	17.2536
GOTERM_BP_DIRECT	GO:0042491~auditory receptor cell differentiation	4	0.00290491	0.00680131	HES1, MYO6, JAG1, CDH23	794	6	10723	9.00336	1	0.289444	11.7689
GOTERM_BP_DIRECT	GO:0072006~nephron development	4	0.00290491	0.00680131	WNT4, SIX2, JAG1, DCHS1	794	6	10723	9.00336	1	0.289444	11.7689
GOTERM_BP_DIRECT	GO:0048843~negative regulation of axon extension involved in axon guidance	7	0.00508359	0.00681162	WNT5A, SEMA5B, NRP1, SEMA6D, SEMA3G, SEMA3C, SLIT1	794	24	10723	3.93897	1	0.28643	11.7857
GOTERM_BP_DIRECT	GO:0045071~negative regulation of viral genome replication	7	0.00508359	0.00681162	MAVS, A230050P20RIK, APOBEC3, SRPK2, LTF, PARP10, ISG20	794	24	10723	3.93897	1	0.28643	11.7857
INTERPRO	IPR008266:Tyrosine-protein kinase, active site	12	0.00871472	0.018082	FGFR2, FRK, TYRO3, RET, FGFR3, NTRK2, JAK3, MERTK, EPHB1, CSF1R, AATK, EPHB2	874	72	11604	2.21281	1	0.439621	25.8336
GOTERM_MF_DIRECT	GO:0005215~transporter activity	13	0.00944095	0.025416	SYP, SLC2A5, CRABP1, SLC37A1, SLC22A3, STARD10, SLC5A6, SEC14L4, SLC22A5, SLCO3A1, AQP3, SLC46A1, SLC17A9	761	87	10304	2.02323	1	0.568206	33.2275
INTERPRO	IPR013106:Immunoglobulin V-set	10	0.00726227	0.0183728	NCAM1, VSIG10, IGSF8, MPZL2, CADM1, IGSF3, ACAN, VCAN, CXADR, MCAM	874	54	11604	2.45868	1	0.437214	26.1926
UP_KEYWORDS	Intermediate filament	5	0.00363113	0.0730441	NES, BFSP1, SYNM, KRT20, NEFL	903	22	12297	3.09499	1	0.381746	64.3378
INTERPRO	IPR020846:Major facilitator superfamily domain	13	0.00944095	0.019137	SLC45A3, SLC17A5, SLC2A5, MFSD7C, SLC37A1, MFSD7A, SLC22A3, SLC22A5, SLCO3A1, SLC40A1, SLC43A2, SLC46A1, SLC17A9	874	82	11604	2.10487	1	0.443108	27.128
GOTERM_BP_DIRECT	GO:0050680~negative regulation of epithelial cell proliferation	11	0.0079885	0.00731356	FGFR2, WNT5A, DAB2, LIMS2, GPC3, FGFR3, SFRP1, PAX6, GAS1, IFT88, TGFB2	794	56	10723	2.65278	1	0.300556	12.6
UP_SEQ_FEATURE	domain:EGF-like 9; calcium-binding	5	0.00363113	0.011827	LTBP1, LTBP3, LTBP4, SCUBE1, FBN1	814	13	11138	5.26271	1	0.541749	18.7108
UP_SEQ_FEATURE	domain:EGF-like 12; calcium-binding	5	0.00363113	0.011827	NOTCH3, LTBP1, LTBP3, LTBP4, FBN1	814	13	11138	5.26271	1	0.541749	18.7108
GOTERM_CC_DIRECT	GO:0008076~voltage-gated potassium channel complex	7	0.00508359	0.0530033	KCNC1, KCNQ5, CNTN2, CNTNAP2, CALM3, KCNH2, ABCC8	849	37	11424	2.5457	1	0.425818	54.2413
GOTERM_CC_DIRECT	GO:0043235~receptor complex	11	0.0079885	0.0535908	NOTCH3, TNFRSF1A, RET, APP, PTH1R, NTRK2, SMAD3, ITGB5, ENG, PKD2L1, GHR	849	76	11424	1.94755	1	0.422864	54.6471
SMART	SM00186:FBG	3	0.00217868	0.0889972	TNC, FIBCD1, ANGPTL2	549	6	6322	5.75774	1	0.663341	71.0738
SMART	SM00131:KU	3	0.00217868	0.0889972	APP, TFPI, SPINT1	549	6	6322	5.75774	1	0.663341	71.0738
SMART	SM00630:Sema	6	0.00435736	0.0895614	SEMA5B, SEMA6D, SEMA3G, PLXNA2, SEMA7A, SEMA3C	549	28	6322	2.4676	1	0.651379	71.3113
SMART	SM01381:SM01381	6	0.00435736	0.0895614	EDNRB, ADRB1, CHRM4, ADORA2A, DRD4, GPR50	549	28	6322	2.4676	1	0.651379	71.3113
GOTERM_BP_DIRECT	GO:0050728~negative regulation of inflammatory response	10	0.00726227	0.00775525	TYRO3, TNFRSF1A, UACA, ADORA2A, ETS1, SMAD3, METRNL, RORA, ADA, SLIT2	794	48	10723	2.81355	1	0.312036	13.3108
GOTERM_BP_DIRECT	GO:0048666~neuron development	9	0.00653604	0.00796092	NCAM1, NRP1, NTF3, VEGFA, HS6ST1, DPYSL3, SKI, GLI2, TGFB2	794	40	10723	3.03863	1	0.315357	13.6399
INTERPRO	IPR001590:Peptidase M12B, ADAM/reprolysin	6	0.00435736	0.0213912	ADAMTS8, ADAM23, ADAMTS10, ADAM22, ADAM8, ADAMTS2	874	22	11604	3.62097	1	0.472986	29.8229
INTERPRO	IPR002870:Peptidase M12B, propeptide	6	0.00435736	0.0213912	ADAMTS8, ADAM23, ADAMTS10, ADAM22, ADAM8, ADAMTS2	874	22	11604	3.62097	1	0.472986	29.8229
GOTERM_MF_DIRECT	GO:0003714~transcription corepressor activity	16	0.0116196	0.0303412	ATF7IP, EID1, RBFOX2, CTBP2, ZHX2, KCTD1, SCAI, SKI, TLE2, ANKRD1, WNT4, CCND1, HOMEZ, JAZF1, TCF4, LOXL2	761	120	10304	1.80534	1	0.621513	38.3292
UP_KEYWORDS	Immunity	20	0.0145245	0.0852074	MAVS, APOBEC3, IFIH1, HMGB3, CADM1, MYO1G, TFEB, PRKCE, CD74, ISG20, PRKD1, ALCAM, SERINC5, ETS1, PSTPIP1, LTF, BCL6, LBP, JAK3, CSF1R	903	185	12297	1.47221	1	0.425433	70.1991
GOTERM_BP_DIRECT	GO:0071310~cellular response to organic substance	7	0.00508359	0.00841354	SYP, CYBA, CCND1, BCL2, SLC6A4, TIMP3, ABCC8	794	25	10723	3.78141	1	0.326468	14.3599
GOTERM_MF_DIRECT	GO:0004867~serine-type endopeptidase inhibitor activity	7	0.00508359	0.0314941	SERPINB9B, APP, COL7A1, TFPI, SPINT1, CRIM1, SERPINB9D	761	33	10304	2.87214	1	0.623387	39.4695
UP_KEYWORDS	Zymogen	11	0.0079885	0.0867071	CTSL, NAGPA, ADAMTS8, PAPPA, KLK4, MMP17, CTSR, CTSC, PCSK5, ADAMTS2, CTSF	903	84	12297	1.7833	1	0.425403	70.8564
UP_KEYWORDS	Tyrosine-protein kinase	11	0.0079885	0.0867071	FGFR2, FRK, TYRO3, RET, FGFR3, NTRK2, JAK3, MERTK, EPHB1, CSF1R, EPHB2	903	84	12297	1.7833	1	0.425403	70.8564
UP_KEYWORDS	Oxidation	3	0.00217868	0.088181	ACTG2, ACTA1, ACTA2	903	7	12297	5.83626	1	0.425286	71.4893
UP_KEYWORDS	Prenylation	14	0.0101672	0.0913805	UCHL1, PHKA1, ALDH3B2, RHOQ, CNP, RND3, RAB32, PPP1R16B, RAC3, RAB15, RAB6B, ERAS, RHOF, RASD1	903	118	12297	1.61569	1	0.431575	72.8196
GOTERM_BP_DIRECT	GO:0051968~positive regulation of synaptic transmission, glutamatergic	5	0.00363113	0.00908869	PTGS2, ADORA2A, NTRK2, SHANK2, IQSEC2	794	12	10723	5.6271	1	0.343959	15.4234
GOTERM_BP_DIRECT	GO:0043066~negative regulation of apoptotic process	41	0.0297753	0.0091388	WNT5A, ZFAND6, LIMS2, CXCR2, GLI2, SOX8, PDCD4, WT1, ADA, CD74, TGFB2, GATA1, EDNRB, TNFRSF1A, DAB2, GATA6, BCL2, BCL11B, LTF, BCL6, PRKAA2, THBS1, NQO1, SCX, CSF1R, CRYAB, PIM1, SMAD3, GAS1, PRKCE, KITL, FLNA, GAS6, POR, PLK3, SFRP1, BTG2, ID1, VEGFA, SLC40A1, CAMK1D	794	369	10723	1.50056	1	0.341923	15.5019
GOTERM_BP_DIRECT	GO:0045668~negative regulation of osteoblast differentiation	8	0.00580982	0.00921472	SFRP1, ID2, ID1, SMAD3, SKI, ID3, CHRD, IGFBP5	794	33	10723	3.27395	1	0.340705	15.6206
GOTERM_BP_DIRECT	GO:0001558~regulation of cell growth	9	0.00653604	0.00926656	TMC8, SGK2, WISP1, HTRA1, CLSTN1, IGFBP2, IGFBP3, CRIM1, IGFBP5	794	41	10723	2.96452	1	0.338802	15.7016
GOTERM_CC_DIRECT	GO:0014704~intercalated disc	7	0.00508359	0.0657333	ANXA6, ATP1B1, VAMP5, DSP, GJA1, CDH2, CXADR	849	39	11424	2.41515	1	0.485713	62.3211
UP_SEQ_FEATURE	site:Susceptible to oxidation	3	0.00217868	0.0151907	APP, CRYAB, UCHL1	814	3	11138	13.683	1	0.622917	23.3964
INTERPRO	IPR000998:MAM domain	4	0.00290491	0.0252822	NRP2, NRP1, NPNT, MDGA1	874	9	11604	5.90084	1	0.523866	34.2558
GOTERM_BP_DIRECT	GO:0031175~neuron projection development	17	0.0123459	0.0103316	FLRT3, MATN2, CDK5R1, CLMN, TNC, NCAM1, LAMA1, APP, WNT7B, BTG2, UNC5A, ULK1, RAC3, SEMA7A, CNTN2, PHGDH, CNTNAP2	794	115	10723	1.9964	1	0.366059	17.3487
UP_SEQ_FEATURE	domain:Cadherin 2	6	0.00435736	0.0155879	FAT3, CLSTN1, CDH2, CDH4, CDH23, PCDH18	814	21	11138	3.90944	1	0.622124	23.9326
UP_SEQ_FEATURE	domain:Cadherin 1	6	0.00435736	0.0155879	FAT3, CLSTN1, CDH2, CDH4, CDH23, PCDH18	814	21	11138	3.90944	1	0.622124	23.9326
UP_SEQ_FEATURE	domain:UPAR/Ly6	4	0.00290491	0.0164318	LYPD6B, LY6A, LYPD6, LY6E	814	8	11138	6.84152	1	0.631596	25.06
UP_SEQ_FEATURE	domain:MAM	4	0.00290491	0.0164318	NRP2, NRP1, NPNT, MDGA1	814	8	11138	6.84152	1	0.631596	25.06
UP_SEQ_FEATURE	domain:Fibrinogen C-terminal	4	0.00290491	0.0164318	TNC, CNTNAP2, FIBCD1, ANGPTL2	814	8	11138	6.84152	1	0.631596	25.06
UP_SEQ_FEATURE	domain:EGF-like 13; calcium-binding	4	0.00290491	0.0164318	NOTCH3, LTBP1, LTBP4, FBN1	814	8	11138	6.84152	1	0.631596	25.06
GOTERM_MF_DIRECT	GO:0046982~protein heterodimerization activity	37	0.0268704	0.0373287	ADORA2A, ADCY5, TFEB, TGFB3, KATNB1, SOX4, LTC4S, RRAGD, NRN1, MEIS1, SOX8, TGFB2, AMPH, BCL2, CHRNA4, PPP3CA, TCF4, SCX, NEFL, CEBPA, MAF, TYRO3, BMP2, SCUBE1, ZHX2, SMAD3, MID2, ATF6, VEGFB, CYBA, ADRB1, VEGFA, PBX1, EXT1, AOC3, BMP6, BTBD11	761	360	10304	1.39162	1	0.675236	44.944
GOTERM_MF_DIRECT	GO:0005249~voltage-gated potassium channel activity	6	0.00435736	0.0387642	HCN2, KCNC1, KCNQ5, KCNH2, HCN4, KCNH3	761	26	10304	3.12463	1	0.678047	46.2179
GOTERM_MF_DIRECT	GO:0005544~calcium-dependent phospholipid binding	6	0.00435736	0.0387642	ANXA6, ANXA8, PLA2G4A, SYT8, DOC2G, SYT7	761	26	10304	3.12463	1	0.678047	46.2179
GOTERM_CC_DIRECT	GO:0045177~apical part of cell	11	0.0079885	0.0711888	CTSL, APP, MYO6, MYO1B, DYNC2LI1, RAPGEF3, JAG1, IFT88, CAR2, DCHS1, CDH23	849	80	11424	1.85018	1	0.507416	65.3593
GOTERM_BP_DIRECT	GO:0043408~regulation of MAPK cascade	8	0.00580982	0.010882	BMP2, GDF1, ID1, NTRK2, TGFB3, BMP7, TGFB2, BMP6	794	34	10723	3.17766	1	0.377717	18.188
GOTERM_BP_DIRECT	GO:0030324~lung development	14	0.0101672	0.0111872	FGFR2, WNT5A, CEBPA, FGF18, GLI2, ADA, HES1, WNT7B, GPC3, CRISPLD2, VEGFA, IFT88, ADAMTS2, NFIB	794	87	10723	2.17322	1	0.382369	18.65
GOTERM_BP_DIRECT	GO:0061045~negative regulation of wound healing	4	0.00290491	0.0112521	WNT4, CASK, SMAD3, GJA1	794	7	10723	7.71716	1	0.380538	18.7479
GOTERM_BP_DIRECT	GO:0071679~commissural neuron axon guidance	4	0.00290491	0.0112521	NRP1, VEGFA, EPHB2, NFIB	794	7	10723	7.71716	1	0.380538	18.7479
GOTERM_BP_DIRECT	GO:0035810~positive regulation of urine volume	4	0.00290491	0.0112521	EDNRB, ADORA2A, NPPB, NPR3	794	7	10723	7.71716	1	0.380538	18.7479
GOTERM_BP_DIRECT	GO:2000096~positive regulation of Wnt signaling pathway, planar cell polarity pathway	4	0.00290491	0.0112521	DAB2, NKD1, GPC3, MLLT3	794	7	10723	7.71716	1	0.380538	18.7479
GOTERM_BP_DIRECT	GO:0048247~lymphocyte chemotaxis	4	0.00290491	0.0112521	CXCL16, CX3CL1, ADAM8, CCL7	794	7	10723	7.71716	1	0.380538	18.7479
GOTERM_BP_DIRECT	GO:0042493~response to drug	27	0.0196081	0.0123078	PTGS2, ADORA2A, PPARG, SLC6A4, MDK, ADA, TGFB2, GATA6, BCL2, THBS1, LPL, RET, VAV3, MYO6, EMX2, ATP1A3, FOSB, POR, NCAM1, VEGFB, CYBA, CCND1, SFRP1, SMPD1, NPPB, IGFBP2, ABCC8	794	221	10723	1.64994	1	0.404258	20.3248
GOTERM_BP_DIRECT	GO:0008344~adult locomotory behavior	9	0.00653604	0.0123471	ATXN1, APP, ID2, DRD4, ATP1A3, CNP, ADAM22, CDH23, KALRN	794	43	10723	2.82664	1	0.401646	20.3831
GOTERM_BP_DIRECT	GO:0002089~lens morphogenesis in camera-type eye	5	0.00363113	0.0123715	FGFR3, TDRD7, SOX11, SKI, MEIS1	794	13	10723	5.19425	1	0.398709	20.4191
GOTERM_BP_DIRECT	GO:0010596~negative regulation of endothelial cell migration	5	0.00363113	0.0123715	ACVRL1, DLL4, STC1, THBS1, SLIT2	794	13	10723	5.19425	1	0.398709	20.4191
GOTERM_BP_DIRECT	GO:0030501~positive regulation of bone mineralization	7	0.00508359	0.0123964	BMP2, WNT4, FGFR3, TGFB3, SMAD3, BMP7, BMP6	794	27	10723	3.50131	1	0.39584	20.456
GOTERM_BP_DIRECT	GO:0048514~blood vessel morphogenesis	7	0.00508359	0.0123964	ACVRL1, VEGFA, EFNB2, GJA1, CDH2, THBS1, MEIS1	794	27	10723	3.50131	1	0.39584	20.456
GOTERM_BP_DIRECT	GO:0007156~homophilic cell adhesion via plasma membrane adhesion molecules	10	0.00726227	0.0130744	RET, CADM1, FAT3, CLSTN1, CDH2, PCDH7, CDH4, DCHS1, CDH23, PCDH18	794	52	10723	2.59712	1	0.408849	21.4518
GOTERM_BP_DIRECT	GO:0030282~bone mineralization	6	0.00435736	0.0133019	FGFR2, BMP2, GPC3, FGFR3, PTGS2, PTH1R	794	20	10723	4.05151	1	0.410777	21.7834
GOTERM_BP_DIRECT	GO:0046697~decidualization	6	0.00435736	0.0133019	CTSL, PLA2G4A, PTGS2, STC2, STC1, GJB2	794	20	10723	4.05151	1	0.410777	21.7834
GOTERM_BP_DIRECT	GO:0007219~Notch signaling pathway	14	0.0101672	0.0134271	DTX4, CEBPA, BMP2, PGAM2, JAG1, DLK1, HES1, NOTCH3, APP, NRARP, MIB2, DLL4, NEURL1A, IFT88	794	89	10723	2.12439	1	0.410273	21.9653
GOTERM_BP_DIRECT	GO:0048013~ephrin receptor signaling pathway	8	0.00580982	0.0148549	NCK2, CDK5R1, NCK1, EFNA2, EFNB2, EFNA5, EPHB1, EPHB2	794	36	10723	3.00112	1	0.43916	24.0115
GOTERM_BP_DIRECT	GO:0007195~adenylate cyclase-inhibiting dopamine receptor signaling pathway	3	0.00217868	0.015582	ADCY5, DRD4, FLNA	794	3	10723	13.505	1	0.451366	25.0339
GOTERM_BP_DIRECT	GO:0060385~axonogenesis involved in innervation	3	0.00217868	0.015582	NPTX1, FGFR3, NRP1	794	3	10723	13.505	1	0.451366	25.0339
GOTERM_BP_DIRECT	GO:0032349~positive regulation of aldosterone biosynthetic process	3	0.00217868	0.015582	DAB2, WNT4, BMP6	794	3	10723	13.505	1	0.451366	25.0339
GOTERM_BP_DIRECT	GO:0035910~ascending aorta morphogenesis	3	0.00217868	0.015582	HES1, SOX4, TGFB2	794	3	10723	13.505	1	0.451366	25.0339
GOTERM_BP_DIRECT	GO:0010468~regulation of gene expression	22	0.015977	0.0156745	ATP1B1, IRX5, PPARG, EMX2, PAX6, DLK1, FAM46A, IRS1, WT1, H19, APP, LBH, GATA6, ULK1, BCL11B, DMD, BCL2, APBA3, PHGDH, TCF19, PRKAA2, SCARA5	794	172	10723	1.72739	1	0.449811	25.1631
GOTERM_BP_DIRECT	GO:0007613~memory	9	0.00653604	0.0161194	PAK6, B4GALT2, ADRB1, PTGS2, SLC6A4, ATP1A3, SHANK2, FOXO6, KALRN	794	45	10723	2.70101	1	0.455627	25.7813
GOTERM_BP_DIRECT	GO:0048546~digestive tract morphogenesis	5	0.00363113	0.0163247	SFRP5, WNT5A, FGFR3, SFRP1, BCL2	794	14	10723	4.82323	1	0.456384	26.0648
GOTERM_BP_DIRECT	GO:0031000~response to caffeine	5	0.00363113	0.0163247	ADORA2A, PPARG, RYR2, PRKAA2, IRS1	794	14	10723	4.82323	1	0.456384	26.0648
GOTERM_BP_DIRECT	GO:0007413~axonal fasciculation	5	0.00363113	0.0163247	WNT5A, CDK5R1, NRP1, CNTN2, EPHB2	794	14	10723	4.82323	1	0.456384	26.0648
GOTERM_BP_DIRECT	GO:0032332~positive regulation of chondrocyte differentiation	5	0.00363113	0.0163247	FGF18, SMAD3, LOXL2, POR, BMP6	794	14	10723	4.82323	1	0.456384	26.0648
GOTERM_BP_DIRECT	GO:0008589~regulation of smoothened signaling pathway	6	0.00435736	0.0164206	FGFR2, TCTN1, RORA, GAS1, GLI2, IFT88	794	21	10723	3.85858	1	0.454909	26.197
GOTERM_BP_DIRECT	GO:0002027~regulation of heart rate	6	0.00435736	0.0164206	IRX5, DMD, RYR2, CALM3, PDE4D, HCN4	794	21	10723	3.85858	1	0.454909	26.197
GOTERM_BP_DIRECT	GO:0007015~actin filament organization	11	0.0079885	0.016496	NCK2, MYO1B, NCK1, BCL2, PDLIM3, FHOD3, AVIL, LMOD1, DBN1, RHOF, PPARGC1B	794	63	10723	2.35802	1	0.453047	26.3008
GOTERM_BP_DIRECT	GO:0032026~response to magnesium ion	4	0.00290491	0.0170238	CCND1, RYR2, THBS1, BMP6	794	8	10723	6.75252	1	0.460209	27.0231
GOTERM_BP_DIRECT	GO:0048484~enteric nervous system development	4	0.00290491	0.0170238	EDNRB, RET, NTF3, SOX8	794	8	10723	6.75252	1	0.460209	27.0231
GOTERM_BP_DIRECT	GO:0045600~positive regulation of fat cell differentiation	8	0.00580982	0.0171865	CEBPA, WDFY2, BMP2, SFRP1, ID2, PPARG, DKKL1, CREBL2	794	37	10723	2.92001	1	0.460058	27.2443
GOTERM_BP_DIRECT	GO:0071805~potassium ion transmembrane transport	8	0.00580982	0.0171865	HCN2, KCNC1, KCNQ5, KCNJ10, KCNH2, HCN4, KCNH3, PKD2L1	794	37	10723	2.92001	1	0.460058	27.2443
GOTERM_BP_DIRECT	GO:0045944~positive regulation of transcription from RNA polymerase II promoter	71	0.0515621	0.0173918	HMGN3, CDX1, RAI1, FOSL2, ACVRL1, PPARG, PAX6, TGFB3, CASK, RHOQ, ZEB2, RORA, JAG1, GLI2, GATA1, APP, GATA6, RAPGEF3, SCX, SSBP4, MYO6, CTBP2, FOXJ2, SOX11, ZFP467, SIX2, FOSB, PPARGC1B, HES1, PRKD1, NCK2, ZFP462, NCK1, VEGFA, SLC40A1, MAVS, FGFR2, WNT5A, GLIS1, TFEB, SOX4, BEX2, NFIX, SOX8, MEIS1, WT1, TNFRSF1A, BCL11B, PPP3CA, TCF4, MAF, CEBPA, BMP2, NTF3, KLF9, SMAD3, KLF14, SKI, FZD5, ATXN1, …	794	738	10723	1.29927	1	0.460733	27.5227
GOTERM_BP_DIRECT	GO:0030308~negative regulation of cell growth	15	0.0108934	0.0176599	DAB2, ACVRL1, SFRP1, CRYAB, FHL1, BCL2, PPARG, GJA1, NPPB, SMAD3, BCL6, GAS1, SLIT2, WT1, TGFB2	794	102	10723	1.98603	1	0.462592	27.8846
GOTERM_BP_DIRECT	GO:0007166~cell surface receptor signaling pathway	15	0.0108934	0.0176599	TSPAN2, PLXNA2, PTH1R, TSPAN5, ARTN, CXCR2, TSPAN15, TSPAN18, FZD5, NCAM1, LAMA1, TNFRSF1A, CBLC, CD82, GPR50	794	102	10723	1.98603	1	0.462592	27.8846
GOTERM_BP_DIRECT	GO:0030178~negative regulation of Wnt signaling pathway	9	0.00653604	0.018289	SFRP5, RNF43, NKD1, CCND1, NKD2, NXN, SFRP1, APCDD1, HIC1	794	46	10723	2.64229	1	0.471166	28.7272
GOTERM_BP_DIRECT	GO:0043433~negative regulation of sequence-specific DNA binding transcription factor activity	10	0.00726227	0.0185609	SFRP5, ID2, ID1, PIM1, ID3, GAS6, FLNA, TRIB2, KLF4, SIGIRR	794	55	10723	2.45546	1	0.47293	29.0885
GOTERM_BP_DIRECT	GO:0031069~hair follicle morphogenesis	6	0.00435736	0.0199895	FGFR2, CTSL, BCL2, FST, IGFBP5, TGFB2	794	22	10723	3.68319	1	0.495225	30.9586
GOTERM_BP_DIRECT	GO:0002040~sprouting angiogenesis	6	0.00435736	0.0199895	NRP1, NRARP, VEGFA, LOXL2, THBS1, ENG	794	22	10723	3.68319	1	0.495225	30.9586
GOTERM_BP_DIRECT	GO:0050919~negative chemotaxis	6	0.00435736	0.0199895	NRP2, WNT5A, SEMA3G, SEMA3C, SLIT1, SLIT2	794	22	10723	3.68319	1	0.495225	30.9586
GOTERM_BP_DIRECT	GO:0010975~regulation of neuron projection development	6	0.00435736	0.0199895	KLK6, SFRP1, PAX6, NCS1, AVIL, DPYSL3	794	22	10723	3.68319	1	0.495225	30.9586
UP_SEQ_FEATURE	region of interest:Linker 12	5	0.00363113	0.0200925	NES, BFSP1, SYNM, KRT20, NEFL	814	15	11138	4.56102	1	0.696118	29.7708
UP_SEQ_FEATURE	domain:TSP type-1 3	5	0.00363113	0.0200925	SEMA5B, THSD4, ADAMTS10, THBS1, ADAMTS2	814	15	11138	4.56102	1	0.696118	29.7708
GOTERM_BP_DIRECT	GO:0048706~embryonic skeletal system development	7	0.00508359	0.0205983	WNT5A, SULF2, PBX1, GAS1, DLK1, SCX, PCSK5	794	30	10723	3.15118	1	0.502438	31.7413
GOTERM_BP_DIRECT	GO:0060395~SMAD protein signal transduction	9	0.00653604	0.0206599	BMP2, GDF1, TGFB3, SMAD3, SKI, BMP7, TGFB2, BTBD11, BMP6	794	47	10723	2.58607	1	0.500226	31.82
GOTERM_BP_DIRECT	GO:0048661~positive regulation of smooth muscle cell proliferation	10	0.00726227	0.0207146	FGFR2, NOTCH3, CYBA, WISP1, PTGS2, ID2, VEGFA, TGM2, CX3CL1, THBS1	794	56	10723	2.41161	1	0.497931	31.8899
GOTERM_BP_DIRECT	GO:0021537~telencephalon development	5	0.00363113	0.0209854	HES1, BMP2, TCTN1, CDH2, IFT88	794	15	10723	4.50168	1	0.499283	32.2345
GOTERM_BP_DIRECT	GO:0010666~positive regulation of cardiac muscle cell apoptotic process	5	0.00363113	0.0209854	GATA6, FNDC1, FBXO32, CXCR2, IGFBP3	794	15	10723	4.50168	1	0.499283	32.2345
GOTERM_BP_DIRECT	GO:0030517~negative regulation of axon extension	5	0.00363113	0.0209854	CDK5R1, NRP1, RTN4R, SLIT2, AATK	794	15	10723	4.50168	1	0.499283	32.2345
GOTERM_BP_DIRECT	GO:0016337~single organismal cell-cell adhesion	12	0.00871472	0.0213341	LIMS2, MPZL2, BCL2, PKP4, CTNND2, DSP, CDH2, ITGA4, ADAM8, CXADR, BOC, SLIT2	794	75	10723	2.16081	1	0.501892	32.676
UP_SEQ_FEATURE	sequence variant	25	0.0181557	0.0220245	APOBEC3, MYO6, NAT2, PAX6, GRIK5, BBX, NPR3, NUDT11, RORA, DLK1, ZFP28, KITL, WT1, SLC7A7, ST6GALNAC5, LY6A, BCL11B, B3GALNT1, CHRNA4, SLC22A5, KCNH2, PMP22, BOC, NFIB, CDH23	814	213	11138	1.60599	1	0.720129	32.1432
GOTERM_BP_DIRECT	GO:0033138~positive regulation of peptidyl-serine phosphorylation	10	0.00726227	0.0230426	PRKD1, WNT5A, PFN2, NTF3, BCL2, NTRK2, VEGFA, RAPGEF3, GAS6, CREBL2	794	57	10723	2.3693	1	0.526036	34.8001
GOTERM_BP_DIRECT	GO:0071526~semaphorin-plexin signaling pathway	7	0.00508359	0.0239937	SEMA5B, NRP1, SEMA6D, SEMA3G, PLXNA2, SEMA3C, FLNA	794	31	10723	3.04952	1	0.53739	35.9548
GOTERM_BP_DIRECT	GO:0048662~negative regulation of smooth muscle cell proliferation	6	0.00435736	0.0240303	PPARG, NPPB, NPR3, IGFBP3, KLF4, IGFBP5	794	23	10723	3.52305	1	0.534772	35.9988
GOTERM_BP_DIRECT	GO:0035987~endodermal cell differentiation	6	0.00435736	0.0240303	COL7A1, GATA6, COL12A1, ITGB5, COL6A1, ITGA4	794	23	10723	3.52305	1	0.534772	35.9988
GOTERM_BP_DIRECT	GO:0090023~positive regulation of neutrophil chemotaxis	4	0.00290491	0.0241521	CXCR2, LBP, CD74, CAMK1D	794	9	10723	6.00224	1	0.533459	36.1452
GOTERM_BP_DIRECT	GO:0032233~positive regulation of actin filament bundle assembly	4	0.00290491	0.0241521	PFN2, ID1, SYNPO2, SYNPO	794	9	10723	6.00224	1	0.533459	36.1452
GOTERM_BP_DIRECT	GO:0044342~type B pancreatic cell proliferation	4	0.00290491	0.0241521	ADK, TCF19, IGFBP3, IGFBP5	794	9	10723	6.00224	1	0.533459	36.1452
GOTERM_BP_DIRECT	GO:0045839~negative regulation of mitotic nuclear division	4	0.00290491	0.0241521	FGFR2, FGFR3, TOM1L2, BMP7	794	9	10723	6.00224	1	0.533459	36.1452
GOTERM_BP_DIRECT	GO:0050930~induction of positive chemotaxis	4	0.00290491	0.0241521	VEGFB, NTF3, VEGFA, ARTN	794	9	10723	6.00224	1	0.533459	36.1452
GOTERM_BP_DIRECT	GO:0001503~ossification	11	0.0079885	0.0245815	FGF18, BMP2, BCL2, PTH1R, RASSF2, LTF, STC1, EXT1, BMP7, PPARGC1B, BMP6	794	67	10723	2.21725	1	0.536702	36.6588
GOTERM_BP_DIRECT	GO:0055085~transmembrane transport	25	0.0181557	0.0252248	SLC45A3, SLC39A14, KCNC1, ABCD1, SFXN3, GJA1, KCNQ5, SLC2A5, MFSD7C, MFSD7A, SLC39A8, SLC22A3, SLC22A5, HCN4, SLC39A4, SLC43A2, HCN2, SLC17A5, SLC37A1, RYR2, SLC5A6, KCNH2, KCNH3, SLC17A9, SLC46A1	794	213	10723	1.5851	1	0.542954	37.4209
GOTERM_BP_DIRECT	GO:0071456~cellular response to hypoxia	12	0.00871472	0.0254816	SFRP1, PTGS2, STC2, GATA6, BCL2, FNDC1, VEGFA, STC1, RORA, ANKRD1, ADAM8, PRKCE	794	77	10723	2.10468	1	0.543554	37.7226
GOTERM_BP_DIRECT	GO:0008542~visual learning	8	0.00580982	0.0257066	ATXN1, APP, B4GALT2, AP1S2, LRRN4, ATP1A3, TANC1, PDE8B	794	40	10723	2.70101	1	0.543696	37.986
GOTERM_BP_DIRECT	GO:0048545~response to steroid hormone	5	0.00363113	0.0263819	DAB2, ACTA1, BCL2, IDH1, CAR2	794	16	10723	4.22032	1	0.550093	38.7698
GOTERM_BP_DIRECT	GO:0048557~embryonic digestive tract morphogenesis	5	0.00363113	0.0263819	FGFR2, OVOL2, ID2, SOX11, SIX2	794	16	10723	4.22032	1	0.550093	38.7698
GOTERM_BP_DIRECT	GO:0048168~regulation of neuronal synaptic plasticity	5	0.00363113	0.0263819	SYP, ARC, CNTN2, EPHB2, KALRN	794	16	10723	4.22032	1	0.550093	38.7698
GOTERM_BP_DIRECT	GO:0002009~morphogenesis of an epithelium	5	0.00363113	0.0263819	FRAS1, WNT5A, FGFR3, GLI2, CAR2	794	16	10723	4.22032	1	0.550093	38.7698
GOTERM_BP_DIRECT	GO:0043278~response to morphine	5	0.00363113	0.0263819	PRKCG, FOSB, PRKCE, ADA, GHR	794	16	10723	4.22032	1	0.550093	38.7698
GOTERM_BP_DIRECT	GO:0071320~cellular response to cAMP	7	0.00508359	0.027744	NOX4, HCN2, APP, STC1, RAPGEF3, HCN4, IGFBP5	794	32	10723	2.95423	1	0.565489	40.3225
GOTERM_BP_DIRECT	GO:0006468~protein phosphorylation	47	0.0341327	0.0279895	FGFR2, WNT5A, FRK, CDK5R1, FGFR3, ACVRL1, PHKA1, CASK, PXK, BRSK1, EPHB1, TRIB2, TGFB2, EPHB2, PAK6, MAP3K6, APP, SBK1, WNK4, PRKRA, MLKL, MASTL, PRKAA2, CSF1R, AATK, SRPK2, TYRO3, RET, BMP2, SGK2, PIM1, PRKCG, PRKCE, GAS6, PRKD1, RPS6KA6, LAMA1, CCND1, PLK3, ULK1, NTRK2, RIPK3, JAK3, MERTK, IGFBP3, KALRN, CAMK1D	794	468	10723	1.35628	1	0.565719	40.5984
GOTERM_BP_DIRECT	GO:0051781~positive regulation of cell division	6	0.00435736	0.0285615	FGFR2, VEGFB, VEGFA, TGFB3, MDK, TGFB2	794	24	10723	3.37626	1	0.570176	41.2364
GOTERM_BP_DIRECT	GO:0007416~synapse assembly	6	0.00435736	0.0285615	FLRT3, MYO6, CADM1, BSN, CDH2, SHANK2	794	24	10723	3.37626	1	0.570176	41.2364
GOTERM_BP_DIRECT	GO:0010811~positive regulation of cell-substrate adhesion	6	0.00435736	0.0285615	SMOC2, SPOCK2, NPNT, THBS1, PRKCE, DBN1	794	24	10723	3.37626	1	0.570176	41.2364
UP_SEQ_FEATURE	domain:TB 4	3	0.00217868	0.0289157	LTBP1, LTBP4, FBN1	814	4	11138	10.2623	1	0.805206	40.0041
UP_SEQ_FEATURE	domain:F5/8 type C 1	3	0.00217868	0.0289157	NRP2, NRP1, F8	814	4	11138	10.2623	1	0.805206	40.0041
UP_SEQ_FEATURE	region of interest:Interaction with IFI204	3	0.00217868	0.0289157	ID2, ID1, ID3	814	4	11138	10.2623	1	0.805206	40.0041
UP_SEQ_FEATURE	domain:F5/8 type C 2	3	0.00217868	0.0289157	NRP2, NRP1, F8	814	4	11138	10.2623	1	0.805206	40.0041
UP_SEQ_FEATURE	domain:VWFA 3	3	0.00217868	0.0289157	COL6A2, COL12A1, COL6A1	814	4	11138	10.2623	1	0.805206	40.0041
GOTERM_BP_DIRECT	GO:0045599~negative regulation of fat cell differentiation	8	0.00580982	0.0290914	WNT5A, VEGFA, SMAD3, RORA, DLK1, JAG1, TGFB1I1, TRIB2	794	41	10723	2.63513	1	0.573987	41.8218
GOTERM_BP_DIRECT	GO:0001934~positive regulation of protein phosphorylation	18	0.0130721	0.029101	MAVS, WNT5A, WDFY2, BMP2, GPRC5B, PRR5L, GAS6, EDNRB, DAB2, CCND1, PROM2, FNDC1, SEMA7A, VEGFA, PELI2, RAPGEF3, ENG, CSF1R	794	140	10723	1.73636	1	0.571166	41.8323
GOTERM_BP_DIRECT	GO:0032355~response to estradiol	11	0.0079885	0.0295484	CCND1, FOSL2, PTGS2, CRYAB, ETS1, SLC6A4, TFPI, IGFBP2, NQO1, BMP7, GJB2	794	69	10723	2.15298	1	0.573875	42.3222
GOTERM_BP_DIRECT	GO:0002544~chronic inflammatory response	3	0.00217868	0.0296409	PTGES, GJA1, THBS1	794	4	10723	10.1288	1	0.572133	42.4229
GOTERM_BP_DIRECT	GO:0051964~negative regulation of synapse assembly	3	0.00217868	0.0296409	WNT5A, MDGA1, SLIT1	794	4	10723	10.1288	1	0.572133	42.4229
GOTERM_BP_DIRECT	GO:0045578~negative regulation of B cell differentiation	3	0.00217868	0.0296409	HMGB3, SFRP1, ID2	794	4	10723	10.1288	1	0.572133	42.4229
GOTERM_BP_DIRECT	GO:0038084~vascular endothelial growth factor signaling pathway	3	0.00217868	0.0296409	NRP2, NRP1, VEGFA	794	4	10723	10.1288	1	0.572133	42.4229
GOTERM_BP_DIRECT	GO:0035815~positive regulation of renal sodium excretion	3	0.00217868	0.0296409	EDNRB, ADORA2A, NPPB	794	4	10723	10.1288	1	0.572133	42.4229
GOTERM_BP_DIRECT	GO:0010694~positive regulation of alkaline phosphatase activity	3	0.00217868	0.0296409	NPNT, SMAD3, PPARGC1B	794	4	10723	10.1288	1	0.572133	42.4229
GOTERM_BP_DIRECT	GO:0090131~mesenchyme migration	3	0.00217868	0.0296409	ACTG2, ACTA1, ACTA2	794	4	10723	10.1288	1	0.572133	42.4229
GOTERM_BP_DIRECT	GO:0090090~negative regulation of canonical Wnt signaling pathway	12	0.00871472	0.0301842	SFRP5, WNT5A, DAB2, BMP2, WNT4, NKD1, NKD2, GPC3, SFRP1, CDH2, TLE2, MLLT3	794	79	10723	2.0514	1	0.575963	43.0116
INTERPRO	IPR013151:Immunoglobulin	6	0.00435736	0.0304991	IGLON5, SEMA3G, CXADR, MERTK, BOC, CSF1R	874	24	11604	3.31922	1	0.584583	39.7877
INTERPRO	IPR026052:DNA-binding protein inhibitor	3	0.00217868	0.0306236	ID2, ID1, ID3	874	4	11604	9.95767	1	0.578416	39.9141
INTERPRO	IPR001283:Allergen V5/Tpx-1-related	3	0.00217868	0.0306236	GLIPR2, CRISPLD2, GLIPR1	874	4	11604	9.95767	1	0.578416	39.9141
INTERPRO	IPR018244:Allergen V5/Tpx-1-related, conserved site	3	0.00217868	0.0306236	GLIPR2, CRISPLD2, GLIPR1	874	4	11604	9.95767	1	0.578416	39.9141
INTERPRO	IPR014044:CAP domain	3	0.00217868	0.0306236	GLIPR2, CRISPLD2, GLIPR1	874	4	11604	9.95767	1	0.578416	39.9141
UP_SEQ_FEATURE	domain:Cadherin 5	5	0.00363113	0.031197	FAT3, CDH2, CDH4, CDH23, PCDH18	814	17	11138	4.02443	1	0.821621	42.4114
UP_SEQ_FEATURE	metal ion-binding site:Calcium 1; via carbonyl oxygen	5	0.00363113	0.031197	NPTX1, SYT11, COLEC12, PRKCG, AOC3	814	17	11138	4.02443	1	0.821621	42.4114
UP_SEQ_FEATURE	domain:EGF-like 15; calcium-binding	4	0.00290491	0.0315514	NOTCH3, LTBP1, FBN1, JAG1	814	10	11138	5.47322	1	0.817723	42.7772
INTERPRO	IPR011701:Major facilitator superfamily	8	0.00580982	0.0315878	SLC45A3, SLC17A5, MFSD7C, SLC37A1, MFSD7A, SLC43A2, SLC46A1, SLC17A9	874	41	11604	2.59061	1	0.58238	40.8856
UP_SEQ_FEATURE	domain:Sema	6	0.00435736	0.0319936	SEMA5B, SEMA6D, SEMA3G, PLXNA2, SEMA7A, SEMA3C	814	25	11138	3.28393	1	0.814801	43.2304
UP_SEQ_FEATURE	metal ion-binding site:Calcium 1	6	0.00435736	0.0319936	NPTX1, SYT11, COLEC12, PRKCG, SYT7, AOC3	814	25	11138	3.28393	1	0.814801	43.2304
GOTERM_BP_DIRECT	GO:0043627~response to estrogen	9	0.00653604	0.0323255	CCND1, GATA6, PPARG, TGFB3, ARSA, IGFBP2, GSTM5, CAR2, TGFB2	794	51	10723	2.38324	1	0.598529	45.2764
GOTERM_BP_DIRECT	GO:0008045~motor neuron axon guidance	5	0.00363113	0.0325344	ALCAM, NRP1, KIF5C, SLIT1, SLIT2	794	17	10723	3.97207	1	0.598078	45.4928
GOTERM_BP_DIRECT	GO:0051924~regulation of calcium ion transport	5	0.00363113	0.0325344	CACNA2D1, ADRB1, ADORA2A, BCL2, GJA1	794	17	10723	3.97207	1	0.598078	45.4928
GOTERM_BP_DIRECT	GO:0030902~hindbrain development	5	0.00363113	0.0325344	KDM2B, PAX6, GLI2, BMP7, NFIB	794	17	10723	3.97207	1	0.598078	45.4928
GOTERM_BP_DIRECT	GO:0070207~protein homotrimerization	5	0.00363113	0.0325344	COL23A1, MLKL, SKI, SCARA5, PKD2L1	794	17	10723	3.97207	1	0.598078	45.4928
GOTERM_BP_DIRECT	GO:0009268~response to pH	4	0.00290491	0.0326412	ARSA, GJA1, ABCC8, CAR2	794	10	10723	5.40202	1	0.59647	45.6031
GOTERM_BP_DIRECT	GO:0007435~salivary gland morphogenesis	4	0.00290491	0.0326412	TGFB3, PAX6, BMP7, TGFB2	794	10	10723	5.40202	1	0.59647	45.6031
GOTERM_BP_DIRECT	GO:0060445~branching involved in salivary gland morphogenesis	4	0.00290491	0.0326412	FGFR2, LAMA1, TGM2, BMP7	794	10	10723	5.40202	1	0.59647	45.6031
GOTERM_BP_DIRECT	GO:0022407~regulation of cell-cell adhesion	4	0.00290491	0.0326412	WNT4, NRARP, EFNA5, ADAM8	794	10	10723	5.40202	1	0.59647	45.6031
GOTERM_BP_DIRECT	GO:0021675~nerve development	4	0.00290491	0.0326412	NRP2, CTSL, NRP1, NTF3	794	10	10723	5.40202	1	0.59647	45.6031
GOTERM_BP_DIRECT	GO:0006883~cellular sodium ion homeostasis	4	0.00290491	0.0326412	ATP1B1, TESC, SGK2, ATP1A3	794	10	10723	5.40202	1	0.59647	45.6031
GOTERM_BP_DIRECT	GO:0007568~aging	16	0.0116196	0.0330675	NOX4, CRYAB, ALDOC, COL3A1, PTH1R, TGFB3, CNP, PDE4D, ADA, NCAM1, EDNRB, DMD, CTSC, IGFBP2, NQO1, IGFBP5	794	121	10723	1.78579	1	0.598496	46.0412
GOTERM_BP_DIRECT	GO:0050766~positive regulation of phagocytosis	6	0.00435736	0.0335985	TULP1, CYBA, RAP1GAP, MERTK, GAS6, CAMK1D	794	25	10723	3.24121	1	0.601647	46.5822
GOTERM_BP_DIRECT	GO:0046426~negative regulation of JAK-STAT cascade	6	0.00435736	0.0335985	LRRC4, FLRT3, FLRT1, RTN4RL1, RTN4R, CISH	794	25	10723	3.24121	1	0.601647	46.5822
GOTERM_BP_DIRECT	GO:0050770~regulation of axonogenesis	6	0.00435736	0.0335985	RET, UST, CDH2, SLIT1, EPHB2, KIF13B	794	25	10723	3.24121	1	0.601647	46.5822
INTERPRO	IPR005331:Sulfotransferase	4	0.00290491	0.0341352	UST, CHST8, HS6ST2, HS6ST1	874	10	11604	5.31076	1	0.603841	43.3815
GOTERM_BP_DIRECT	GO:0030509~BMP signaling pathway	9	0.00653604	0.0358257	BMP2, ACVRL1, GDF1, ID1, FST, RYR2, BMP7, SCX, BMP6	794	52	10723	2.33741	1	0.622872	48.7963
GOTERM_BP_DIRECT	GO:0051496~positive regulation of stress fiber assembly	7	0.00508359	0.0363572	NOX4, PFN2, WNT4, ARHGEF5, TGFB3, SMAD3, RAPGEF3	794	34	10723	2.78045	1	0.625635	49.3118
GOTERM_BP_DIRECT	GO:0030216~keratinocyte differentiation	7	0.00508359	0.0363572	WNT5A, PTGS2, IRF6, ST14, TGM1, PAX6, DSP	794	34	10723	2.78045	1	0.625635	49.3118
GOTERM_BP_DIRECT	GO:0071300~cellular response to retinoic acid	8	0.00580982	0.0367346	RET, TESC, WNT7B, TNC, CYP26B1, PPARG, SLC6A4, KLF4	794	43	10723	2.51257	1	0.62677	49.6748
GOTERM_BP_DIRECT	GO:0050885~neuromuscular process controlling balance	8	0.00580982	0.0367346	RBFOX2, APP, AP1S2, RAC3, ADCY5, CLIC5, PDE8B, NEFL	794	43	10723	2.51257	1	0.62677	49.6748
GOTERM_BP_DIRECT	GO:0060070~canonical Wnt signaling pathway	11	0.0079885	0.0382698	SFRP5, WNT5A, WNT7B, WNT4, CCND1, SFRP1, SOX4, RYR2, SMAD3, FZD5, KLF4	794	72	10723	2.06327	1	0.639407	51.1261
GOTERM_BP_DIRECT	GO:0008584~male gonad development	12	0.00871472	0.0383528	GATA1, WNT5A, CTSL, TESC, WNT4, SFRP1, GATA6, BCL2, KITL, SOX8, WT1, TGFB2	794	82	10723	1.97635	1	0.637525	51.2034
GOTERM_MF_DIRECT	GO:0050998~nitric-oxide synthase binding	5	0.00363113	0.0391204	DMD, SLC6A4, CALM3, CDH2, CD74	761	18	10304	3.76113	1	0.67055	46.5297
GOTERM_BP_DIRECT	GO:0030199~collagen fibril organization	6	0.00435736	0.0391532	COL3A1, ACAN, LOXL2, SCX, ADAMTS2, TGFB2	794	26	10723	3.11655	1	0.642599	51.9432
GOTERM_BP_DIRECT	GO:0001837~epithelial to mesenchymal transition	6	0.00435736	0.0391532	FGFR2, BMP2, WNT4, LOXL2, FLNA, TGFB2	794	26	10723	3.11655	1	0.642599	51.9432
GOTERM_BP_DIRECT	GO:0061003~positive regulation of dendritic spine morphogenesis	5	0.00363113	0.0394547	BHLHB9, XLR3B, ITPKA, DBN1, KALRN	794	18	10723	3.7514	1	0.642822	52.2192
GOTERM_BP_DIRECT	GO:0090263~positive regulation of canonical Wnt signaling pathway	9	0.00653604	0.0395728	FGFR2, WNT4, FGFR3, SULF2, SFRP1, NRARP, SOX4, GPRC5B, BAMBI	794	53	10723	2.29331	1	0.641308	52.3268
UP_SEQ_FEATURE	domain:Ig-like C2-type	9	0.00653604	0.0408394	LINGO3, UNC5B, UNC5A, SEMA3G, SEMA7A, SEMA3C, CNTFR, SIGIRR, KALRN	814	54	11138	2.28051	1	0.879158	51.6165
GOTERM_BP_DIRECT	GO:0042475~odontogenesis of dentin-containing tooth	8	0.00580982	0.0410089	BMP2, WNT7B, BCL11B, TNC, FST, GLI2, BMP7, CAR2	794	44	10723	2.45546	1	0.652068	53.6179
GOTERM_BP_DIRECT	GO:0007268~chemical synaptic transmission	10	0.00726227	0.041027	SYP, MYO6, SLC6A12, SLC6A4, CLSTN1, APBA3, MYCBPAP, GRIK5, PRKCG, GJC1	794	63	10723	2.14366	1	0.649636	53.6339
UP_SEQ_FEATURE	domain:TSP type-1 4	4	0.00290491	0.0410813	SEMA5B, THSD4, ADAMTS10, ADAMTS2	814	11	11138	4.97565	1	0.874921	51.8285
GOTERM_BP_DIRECT	GO:0048286~lung alveolus development	7	0.00508359	0.0412399	FGFR2, ATXN1, VEGFA, TGFB3, HS6ST1, ADA, IGFBP5	794	35	10723	2.70101	1	0.649	53.8224
GOTERM_BP_DIRECT	GO:0009952~anterior/posterior pattern specification	12	0.00871472	0.0413883	WNT5A, CDX1, ARC, SFRP1, BTG2, EMX2, PAX6, PBX1, GLI2, PCSK5, IFT88, MLLT3	794	83	10723	1.95254	1	0.647788	53.9534
GOTERM_BP_DIRECT	GO:0030182~neuron differentiation	12	0.00871472	0.0413883	IER2, RET, CDK5R1, WNT4, BTG2, ID1, NTRK2, EMX2, BRSK1, ID3, CEND1, ACSL4	794	83	10723	1.95254	1	0.647788	53.9534
INTERPRO	IPR027231:Semaphorin	5	0.00363113	0.0416584	SEMA5B, SEMA6D, SEMA3G, SEMA7A, SEMA3C	874	18	11604	3.68802	1	0.671154	50.1874
INTERPRO	IPR001245:Serine-threonine/tyrosine-protein kinase catalytic domain	14	0.0101672	0.0419348	FGFR2, TYRO3, FRK, RET, ACVRL1, FGFR3, EPHB1, EPHB2, NTRK2, MLKL, JAK3, MERTK, CSF1R, AATK	874	102	11604	1.82232	1	0.66652	50.4222
GOTERM_BP_DIRECT	GO:0071380~cellular response to prostaglandin E stimulus	4	0.00290491	0.0424702	SFRP1, PPARG, PRKAA2, PRKCE	794	11	10723	4.91092	1	0.65493	54.8975
GOTERM_BP_DIRECT	GO:0040037~negative regulation of fibroblast growth factor receptor signaling pathway	4	0.00290491	0.0424702	WNT5A, WNT4, SULF2, THBS1	794	11	10723	4.91092	1	0.65493	54.8975
GOTERM_BP_DIRECT	GO:0002042~cell migration involved in sprouting angiogenesis	4	0.00290491	0.0424702	NRP1, VEGFA, EFNB2, SLIT2	794	11	10723	4.91092	1	0.65493	54.8975
GOTERM_BP_DIRECT	GO:0086004~regulation of cardiac muscle cell contraction	4	0.00290491	0.0424702	ADRB1, PDE4B, STC1, PDE4D	794	11	10723	4.91092	1	0.65493	54.8975
GOTERM_BP_DIRECT	GO:0048265~response to pain	4	0.00290491	0.0424702	EDNRB, RET, PRKCG, GCH1	794	11	10723	4.91092	1	0.65493	54.8975
GOTERM_BP_DIRECT	GO:0003215~cardiac right ventricle morphogenesis	4	0.00290491	0.0424702	SOX4, SEMA3C, JAG1, TGFB2	794	11	10723	4.91092	1	0.65493	54.8975
GOTERM_BP_DIRECT	GO:0010839~negative regulation of keratinocyte proliferation	4	0.00290491	0.0424702	CTSL, KLF9, EFNB2, CASK	794	11	10723	4.91092	1	0.65493	54.8975
UP_SEQ_FEATURE	domain:SH3 1	6	0.00435736	0.0431393	VAV3, MYO7B, ARHGEF37, SH3KBP1, FCHSD1, KALRN	814	27	11138	3.04068	1	0.882082	53.5972
GOTERM_BP_DIRECT	GO:0071260~cellular response to mechanical stimulus	9	0.00653604	0.0435725	CYBA, TNFRSF1A, PTGS2, NPPB, GJA1, ANKRD1, SCX, ENG, BMP6	794	54	10723	2.25084	1	0.66202	55.8407
INTERPRO	IPR025660:Cysteine peptidase, histidine active site	4	0.00290491	0.044371	CTSL, CTSR, CTSC, CTSF	874	11	11604	4.82796	1	0.680657	52.4472
GOTERM_MF_DIRECT	GO:0022857~transmembrane transporter activity	6	0.00435736	0.0447923	SLC2A5, SLC37A1, GJA1, SLC22A3, SLC22A5, SLC17A9	761	27	10304	3.00891	1	0.710217	51.2722
UP_SEQ_FEATURE	domain:Cadherin 3	5	0.00363113	0.0452759	FAT3, CDH2, CDH4, CDH23, PCDH18	814	19	11138	3.6008	1	0.889013	55.3687
UP_SEQ_FEATURE	domain:Cadherin 4	5	0.00363113	0.0452759	FAT3, CDH2, CDH4, CDH23, PCDH18	814	19	11138	3.6008	1	0.889013	55.3687
UP_SEQ_FEATURE	DNA-binding region:Homeobox 1	3	0.00217868	0.0458826	HOMEZ, ZHX2, HDX	814	5	11138	8.20983	1	0.887194	55.86
UP_SEQ_FEATURE	DNA-binding region:Homeobox 2	3	0.00217868	0.0458826	HOMEZ, ZHX2, HDX	814	5	11138	8.20983	1	0.887194	55.86
UP_SEQ_FEATURE	domain:VWFC 4	3	0.00217868	0.0458826	FRAS1, CHRD, CRIM1	814	5	11138	8.20983	1	0.887194	55.86
UP_SEQ_FEATURE	domain:PLAC	3	0.00217868	0.0458826	THSD4, ADAMTS10, ADAMTS2	814	5	11138	8.20983	1	0.887194	55.86
GOTERM_BP_DIRECT	GO:0045893~positive regulation of transcription, DNA-templated	44	0.031954	0.0459568	WNT5A, RAI1, ACVRL1, FOSL2, PPARG, GLIS1, TFEB, TGFB3, PAX6, SOX4, RORA, GLI2, MDK, SOX8, WT1, GATA1, DAB2, WNT4, LBH, OVOL2, GATA6, MDFIC, TCF4, SCX, CREBL2, ATF7IP, CEBPA, TESC, RET, BMP2, SOX11, PIM1, SMAD3, PPARGC1B, HES1, SFRP1, ID2, IRF6, ETS1, TGFB1I1, BAMBI, BMP7, KLF4, NFIB	794	448	10723	1.32639	1	0.679462	57.8174
GOTERM_BP_DIRECT	GO:0035019~somatic stem cell population maintenance	7	0.00508359	0.0465169	HES1, ASCL2, FGFR3, SFRP1, ZHX2, SOX4, SKI	794	36	10723	2.62598	1	0.681512	58.2694
GOTERM_BP_DIRECT	GO:0007389~pattern specification process	7	0.00508359	0.0465169	HES1, CDX1, FST, GLI2, BMP7, CHRD, DCHS1	794	36	10723	2.62598	1	0.681512	58.2694
GOTERM_BP_DIRECT	GO:0048739~cardiac muscle fiber development	3	0.00217868	0.0470029	VEGFA, NEXN, CXADR	794	5	10723	8.10302	1	0.682937	58.6579
GOTERM_BP_DIRECT	GO:0032808~lacrimal gland development	3	0.00217868	0.0470029	FGFR2, IGSF3, PAX6	794	5	10723	8.10302	1	0.682937	58.6579
GOTERM_BP_DIRECT	GO:0071578~zinc II ion transmembrane import	3	0.00217868	0.0470029	SLC39A14, SLC39A8, SLC39A4	794	5	10723	8.10302	1	0.682937	58.6579
GOTERM_BP_DIRECT	GO:0021782~glial cell development	3	0.00217868	0.0470029	SOX11, PHGDH, SOX4	794	5	10723	8.10302	1	0.682937	58.6579
GOTERM_BP_DIRECT	GO:0001771~immunological synapse formation	3	0.00217868	0.0470029	NCK2, DOCK8, EPHB1	794	5	10723	8.10302	1	0.682937	58.6579
GOTERM_BP_DIRECT	GO:0045636~positive regulation of melanocyte differentiation	3	0.00217868	0.0470029	BCL2, ZEB2, KITL	794	5	10723	8.10302	1	0.682937	58.6579
GOTERM_BP_DIRECT	GO:0008585~female gonad development	5	0.00363113	0.047147	SCHIP1, WNT4, SFRP1, FST, IDH1	794	19	10723	3.55396	1	0.681644	58.7725
GOTERM_BP_DIRECT	GO:0032967~positive regulation of collagen biosynthetic process	5	0.00363113	0.047147	WNT4, LTBP1, TGFB3, SCX, ENG	794	19	10723	3.55396	1	0.681644	58.7725
GOTERM_MF_DIRECT	GO:0005244~voltage-gated ion channel activity	9	0.00653604	0.0471944	HCN2, KCNC1, KCNQ5, CACNA2D1, CLIC5, KCNJ10, KCNH2, HCN4, KCNH3	761	55	10304	2.21565	1	0.719276	53.1595
GOTERM_MF_DIRECT	GO:0008144~drug binding	9	0.00653604	0.0471944	ATP1B1, ADRB1, SFRP1, PYGL, PPARG, DRD4, CHRNA4, PDE4D, PPP3CA	761	55	10304	2.21565	1	0.719276	53.1595
GOTERM_BP_DIRECT	GO:0034765~regulation of ion transmembrane transport	9	0.00653604	0.0478298	HCN2, KCNC1, KCNQ5, CACNA2D1, CLIC5, KCNJ10, KCNH2, HCN4, KCNH3	794	55	10723	2.20992	1	0.68459	59.3112
GOTERM_BP_DIRECT	GO:0001764~neuron migration	12	0.00871472	0.047949	MATN2, NRP2, CDK5R1, NRP1, FAT3, MAPT, MDGA1, NTRK2, PAX6, CNTN2, GJA1, GAS6	794	85	10723	1.90659	1	0.683115	59.4045
GOTERM_MF_DIRECT	GO:0001228~transcriptional activator activity, RNA polymerase II transcription regulatory region sequence-specific binding	10	0.00726227	0.0479873	CEBPA, MAF, OVOL2, KLF9, GATA6, PPARG, GLIS1, PAX6, IRF2, NFIX	761	65	10304	2.08309	1	0.715589	53.7673
INTERPRO	IPR019803:Glypican, conserved site	3	0.00217868	0.0485183	GPC4, GPC3, GPC6	874	5	11604	7.96613	1	0.707038	55.7167
INTERPRO	IPR018497:Peptidase M13, C-terminal domain	3	0.00217868	0.0485183	ECE1, ECEL1, MME	874	5	11604	7.96613	1	0.707038	55.7167
INTERPRO	IPR000718:Peptidase M13	3	0.00217868	0.0485183	ECE1, ECEL1, MME	874	5	11604	7.96613	1	0.707038	55.7167
INTERPRO	IPR001863:Glypican	3	0.00217868	0.0485183	GPC4, GPC3, GPC6	874	5	11604	7.96613	1	0.707038	55.7167
INTERPRO	IPR009168:Insulin-like growth factor binding protein	3	0.00217868	0.0485183	IGFBP2, IGFBP3, IGFBP5	874	5	11604	7.96613	1	0.707038	55.7167
INTERPRO	IPR008753:Peptidase M13, N-terminal domain	3	0.00217868	0.0485183	ECE1, ECEL1, MME	874	5	11604	7.96613	1	0.707038	55.7167
INTERPRO	IPR022321:Insulin-like growth factor-binding protein family 1-6, chordata	3	0.00217868	0.0485183	IGFBP2, IGFBP3, IGFBP5	874	5	11604	7.96613	1	0.707038	55.7167
GOTERM_BP_DIRECT	GO:0045666~positive regulation of neuron differentiation	10	0.00726227	0.0486835	BMP2, BEND6, SOX11, TLE6, BCL6, TCF4, GLI2, BMP7, GPRC5B, BMP6	794	65	10723	2.0777	1	0.6864	59.9753
UP_SEQ_FEATURE	domain:SH3 2	6	0.00435736	0.0494831	VAV3, MYO7B, ARHGEF37, SH3KBP1, FCHSD1, KALRN	814	28	11138	2.93208	1	0.9007	58.6721
UP_SEQ_FEATURE	domain:EF-hand	6	0.00435736	0.0494831	RAB11FIP4, TESC, NKD1, NKD2, NECAB3, EHD2	814	28	11138	2.93208	1	0.9007	58.6721
GOTERM_BP_DIRECT	GO:0060041~retina development in camera-type eye	8	0.00580982	0.0504947	TULP1, LAMA1, RET, NTRK2, PAX6, SKI, MERTK, SOX8	794	46	10723	2.3487	1	0.697629	61.3506
GOTERM_BP_DIRECT	GO:0007565~female pregnancy	8	0.00580982	0.0504947	CLDN4, PAPPA, ETS1, TGFB3, FOSB, IGFBP2, PCSK5, IGFBP5	794	46	10723	2.3487	1	0.697629	61.3506
GOTERM_BP_DIRECT	GO:0021915~neural tube development	8	0.00580982	0.0504947	HES1, WNT5A, SFRP1, PLXNA2, PHGDH, SEMA3C, GLI2, DCHS1	794	46	10723	2.3487	1	0.697629	61.3506
GOTERM_BP_DIRECT	GO:0048167~regulation of synaptic plasticity	6	0.00435736	0.051847	NCAM1, MYO6, ADORA2A, CPEB3, CTNND2, ITPKA	794	28	10723	2.89394	1	0.705086	62.3481
UP_SEQ_FEATURE	region of interest:Triple-helical region	4	0.00290491	0.0518811	COL7A1, COL3A1, COL6A2, COL6A1	814	12	11138	4.56102	1	0.907086	60.4504
GOTERM_BP_DIRECT	GO:0016485~protein processing	9	0.00653604	0.052349	KLK6, CTSL, ECE1, ATG4C, F3, RHBDL3, PCSK6, PCSK5, ADAMTS2	794	56	10723	2.17045	1	0.706334	62.7122
GOTERM_BP_DIRECT	GO:0006813~potassium ion transport	9	0.00653604	0.052349	HCN2, KCNC1, KCNQ5, ATP1B1, ATP1A3, KCNJ10, KCNH2, HCN4, KCNH3	794	56	10723	2.17045	1	0.706334	62.7122
GOTERM_MF_DIRECT	GO:0008307~structural constituent of muscle	4	0.00290491	0.0532407	DMD, PDLIM3, SYNM, NEXN	761	12	10304	4.51336	1	0.743852	57.6114
GOTERM_MF_DIRECT	GO:0051393~alpha-actinin binding	4	0.00290491	0.0532407	MAGI1, ADORA2A, PPARG, PKD2L1	761	12	10304	4.51336	1	0.743852	57.6114
GOTERM_BP_DIRECT	GO:0051412~response to corticosterone	4	0.00290491	0.0535973	CCND1, CALM3, FOSB, NEFL	794	12	10723	4.50168	1	0.712736	63.6031
GOTERM_BP_DIRECT	GO:0016338~calcium-independent cell-cell adhesion via plasma membrane cell-adhesion molecules	4	0.00290491	0.0535973	CADM1, CLDN4, CLDN3, CLDN23	794	12	10723	4.50168	1	0.712736	63.6031
GOTERM_BP_DIRECT	GO:0007548~sex differentiation	4	0.00290491	0.0535973	WNT4, CNTFR, PBX1, DMRTC1A	794	12	10723	4.50168	1	0.712736	63.6031
GOTERM_BP_DIRECT	GO:0001886~endothelial cell morphogenesis	4	0.00290491	0.0535973	ARHGEF26, ID1, STC1, IFT88	794	12	10723	4.50168	1	0.712736	63.6031
GOTERM_BP_DIRECT	GO:0043277~apoptotic cell clearance	4	0.00290491	0.0535973	TYRO3, TGM2, MERTK, GAS6	794	12	10723	4.50168	1	0.712736	63.6031
UP_SEQ_FEATURE	repeat:LRR 4	14	0.0101672	0.0537059	LRRC4, RTN4RL1, LRRN4, RTN4R, TPBG, SLIT1, SLIT2, ELFN1, ELFN2, SLITRK4, KDM2B, LINGO3, LRCH2, ANP32A	814	109	11138	1.75746	1	0.910519	61.7551
GOTERM_BP_DIRECT	GO:0010976~positive regulation of neuron projection development	14	0.0101672	0.054968	WNT5A, RET, KATNB1, UBE2V2, DPYSL3, ANKRD1, GPRC5B, PRKD1, NCK1, DMD, NTRK2, AVIL, DBN1, CAMK1D	794	108	10723	1.75065	1	0.719749	64.5582
INTERPRO	IPR001627:Semaphorin/CD100 antigen	6	0.00435736	0.0551334	SEMA5B, SEMA6D, SEMA3G, PLXNA2, SEMA7A, SEMA3C	874	28	11604	2.84505	1	0.747029	60.4983
UP_SEQ_FEATURE	domain:EGF-like 4	7	0.00508359	0.0553307	MATN2, DLL4, SCUBE1, TNC, DLK1, SLIT1, SLIT2	814	38	11138	2.52056	1	0.912927	62.8824
GOTERM_BP_DIRECT	GO:0007200~phospholipase C-activating G-protein coupled receptor signaling pathway	5	0.00363113	0.0556083	EDNRB, PTH1R, TGM2, CXCR2, NPR3	794	20	10723	3.37626	1	0.721747	64.9962
GOTERM_BP_DIRECT	GO:0035924~cellular response to vascular endothelial growth factor stimulus	5	0.00363113	0.0556083	PRKD1, NRP1, DLL4, VEGFA, GAS1	794	20	10723	3.37626	1	0.721747	64.9962
GOTERM_BP_DIRECT	GO:0001662~behavioral fear response	5	0.00363113	0.0556083	BCL2, DRD4, PDE8B, MDK, KALRN	794	20	10723	3.37626	1	0.721747	64.9962
GOTERM_BP_DIRECT	GO:2001240~negative regulation of extrinsic apoptotic signaling pathway in absence of ligand	5	0.00363113	0.0556083	GATA1, UNC5B, BCL2, GAS1, CX3CL1	794	20	10723	3.37626	1	0.721747	64.9962
GOTERM_BP_DIRECT	GO:0000187~activation of MAPK activity	8	0.00580982	0.0557158	WNT5A, BMP2, NTF3, DRD4, TGFB3, THBS1, CD74, GHR	794	47	10723	2.29873	1	0.720222	65.0692
GOTERM_BP_DIRECT	GO:0050679~positive regulation of epithelial cell proliferation	8	0.00580982	0.0557158	FGFR2, WNT5A, SFRP1, HTRA1, ID1, VEGFA, GAS1, BMP6	794	47	10723	2.29873	1	0.720222	65.0692
GOTERM_BP_DIRECT	GO:0060348~bone development	8	0.00580982	0.0557158	FGFR2, FGFR3, CADM1, SULF2, BBX, STC1, ENG, PLS3	794	47	10723	2.29873	1	0.720222	65.0692
GOTERM_BP_DIRECT	GO:0007160~cell-matrix adhesion	8	0.00580982	0.0557158	TMEM8B, NPNT, COL3A1, CNTN2, ITGA11, ITGB5, ITGA4, ADAM8	794	47	10723	2.29873	1	0.720222	65.0692
INTERPRO	IPR016201:Plexin-like fold	7	0.00508359	0.0559379	SEMA5B, SEMA6D, SEMA3G, PLXNA2, SEMA7A, ITGB5, SEMA3C	874	37	11604	2.51184	1	0.745947	61.0456
INTERPRO	IPR008972:Cupredoxin	4	0.00290491	0.0559427	EFNA2, EFNB2, F8, EFNA5	874	12	11604	4.42563	1	0.739797	61.0488
INTERPRO	IPR001753:Crotonase superfamily	4	0.00290491	0.0559427	ECI1, CDYL2, EHHADH, ECHDC2	874	12	11604	4.42563	1	0.739797	61.0488
INTERPRO	IPR000668:Peptidase C1A, papain C-terminal	4	0.00290491	0.0559427	CTSL, CTSR, CTSC, CTSF	874	12	11604	4.42563	1	0.739797	61.0488
GOTERM_BP_DIRECT	GO:0030335~positive regulation of cell migration	19	0.0137983	0.0563224	BMP2, RET, GCNT2, NTF3, SMAD3, CX3CL1, MCAM, IRS1, TGFB2, SEMA5B, DAB2, SEMA3G, ETS1, CXCL16, SEMA7A, VEGFA, SEMA3C, THBS1, CSF1R	794	163	10723	1.57421	1	0.721973	65.4786
GOTERM_BP_DIRECT	GO:0051897~positive regulation of protein kinase B signaling	9	0.00653604	0.0571338	NOX4, GCNT2, F3, VEGFA, THBS1, ADAM8, TSPYL5, GAS6, IGFBP5	794	57	10723	2.13237	1	0.725007	66.0192
GOTERM_BP_DIRECT	GO:0045444~fat cell differentiation	10	0.00726227	0.0572289	CEBPA, TMEM120A, CCND1, AP1S2, BBS9, PPARG, ARXES2, METRNL, SOX8, KLF4	794	67	10723	2.01568	1	0.72343	66.082
GOTERM_MF_DIRECT	GO:0005179~hormone activity	6	0.00435736	0.0584363	STC2, FBN1, NPPB, STC1, METRNL, PRL2A1	761	29	10304	2.8014	1	0.767893	61.1173
GOTERM_MF_DIRECT	GO:0005109~frizzled binding	6	0.00435736	0.0584363	WNT5A, RNF43, WNT7B, WNT4, SFRP1, BAMBI	761	29	10304	2.8014	1	0.767893	61.1173
INTERPRO	IPR011992:EF-hand-like domain	20	0.0145245	0.0585145	TESC, NKD1, NKD2, SPOCK2, NCS1, NECAB3, PKD2L1, STAT2, MYL9, RAB11FIP4, SMOC2, CBLC, DMD, RASGRP2, AIF1L, CALM3, RYR2, RHBDL3, EHD2, PLS3	874	172	11604	1.54382	1	0.749871	62.7508
INTERPRO	IPR005829:Sugar transporter, conserved site	5	0.00363113	0.0585963	SLC2A5, SLC22A3, SLC22A5, SLC46A1, SLC17A9	874	20	11604	3.31922	1	0.744428	62.8037
INTERPRO	IPR000436:Sushi/SCR/CCP	5	0.00363113	0.0585963	SVEP1, PAPPA, SUSD2, ACAN, VCAN	874	20	11604	3.31922	1	0.744428	62.8037
INTERPRO	IPR002350:Kazal domain	5	0.00363113	0.0585963	SMOC2, HTRA1, SPOCK2, FST, SLCO3A1	874	20	11604	3.31922	1	0.744428	62.8037
GOTERM_BP_DIRECT	GO:0002062~chondrocyte differentiation	6	0.00435736	0.0589934	BMP2, PTH1R, SIX2, GLI2, SCX, NFIB	794	29	10723	2.79415	1	0.732347	67.228
GOTERM_BP_DIRECT	GO:0002053~positive regulation of mesenchymal cell proliferation	6	0.00435736	0.0589934	FGFR2, WNT5A, VEGFA, GAS1, CHRD, IRS1	794	29	10723	2.79415	1	0.732347	67.228
GOTERM_BP_DIRECT	GO:0060048~cardiac muscle contraction	6	0.00435736	0.0589934	VEGFB, ATP1B1, DMD, ATP1A3, RYR2, KCNH2	794	29	10723	2.79415	1	0.732347	67.228
UP_SEQ_FEATURE	repeat:LRR 1	16	0.0116196	0.060592	LRRC4, RTN4RL1, LRRN4, RTN4R, TPBG, SLIT1, SLIT2, ELFN1, ELFN2, SLITRK4, KDM2B, LINGO3, LRCH2, NTRK2, ANP32A, FBXL6	814	133	11138	1.64608	1	0.927917	66.322
UP_SEQ_FEATURE	repeat:LRR 2	16	0.0116196	0.060592	LRRC4, RTN4RL1, LRRN4, RTN4R, TPBG, SLIT1, SLIT2, ELFN1, ELFN2, SLITRK4, KDM2B, LINGO3, LRCH2, NTRK2, ANP32A, FBXL6	814	133	11138	1.64608	1	0.927917	66.322
GOTERM_BP_DIRECT	GO:0007420~brain development	19	0.0137983	0.0619886	NES, CDK5R1, B4GALT2, CADM1, TSPAN2, NTF3, PTPRG, EMX2, PAX6, NRADD, PCDH18, CTTNBP2, ID1, EFNA5, NEURL1A, SEPP1, EXT1, IFT88, AATK	794	165	10723	1.55513	1	0.74811	69.0899
GOTERM_MF_DIRECT	GO:0004713~protein tyrosine kinase activity	12	0.00871472	0.0621257	FGFR2, FRK, TYRO3, RET, FGFR3, NTRK2, JAK3, MERTK, EPHB1, CSF1R, AATK, EPHB2	761	89	10304	1.82563	1	0.780608	63.4399
UP_SEQ_FEATURE	region of interest:Coil 1A	5	0.00363113	0.062347	NES, BFSP1, SYNM, KRT20, NEFL	814	21	11138	3.25787	1	0.929944	67.4009
UP_SEQ_FEATURE	region of interest:Linker 1	5	0.00363113	0.062347	NES, BFSP1, SYNM, KRT20, NEFL	814	21	11138	3.25787	1	0.929944	67.4009
UP_SEQ_FEATURE	region of interest:Coil 1B	5	0.00363113	0.062347	NES, BFSP1, SYNM, KRT20, NEFL	814	21	11138	3.25787	1	0.929944	67.4009
UP_SEQ_FEATURE	region of interest:Rod	5	0.00363113	0.062347	NES, BFSP1, SYNM, KRT20, NEFL	814	21	11138	3.25787	1	0.929944	67.4009
INTERPRO	IPR009071:High mobility group (HMG) box domain	7	0.00508359	0.062389	HMGB3, SOX11, HMGXB4, BBX, SOX4, SOX8, CHD3	874	38	11604	2.44574	1	0.760978	65.1835
GOTERM_BP_DIRECT	GO:0043065~positive regulation of apoptotic process	27	0.0196081	0.0633292	NOX4, BMP2, PTGS2, NTF3, PPARG, TGFB3, SOX4, ANKRD1, SLIT2, WT1, TGFB2, ATF6, PLA2G4A, ADRB1, UACA, SFRP1, GATA6, RASSF2, TGM2, SMPD1, BCL6, NEURL1A, ID3, BMP7, GADD45B, IGFBP3, CAMK1D	794	257	10723	1.41882	1	0.753671	69.8904
UP_SEQ_FEATURE	domain:VWFA	6	0.00435736	0.0637278	CACNA2D1, SVEP1, VWA5A, INTS6, ITGA11, ITGB5	814	30	11138	2.73661	1	0.930739	68.2267
UP_SEQ_FEATURE	site:Reactive bond	4	0.00290491	0.0638973	APP, COL7A1, TFPI, SPINT1	814	13	11138	4.21017	1	0.927879	68.3267
UP_SEQ_FEATURE	repeat:LRR 3	15	0.0108934	0.0641462	LRRC4, RTN4RL1, LRRN4, RTN4R, TPBG, SLIT1, SLIT2, ELFN1, ELFN2, SLITRK4, KDM2B, LINGO3, LRCH2, ANP32A, FBXL6	814	123	11138	1.66866	1	0.925256	68.473
GOTERM_MF_DIRECT	GO:0008146~sulfotransferase activity	5	0.00363113	0.0643103	UST, CHST8, CHST2, HS6ST2, HS6ST1	761	21	10304	3.22383	1	0.784265	64.7532
GOTERM_BP_DIRECT	GO:0045785~positive regulation of cell adhesion	7	0.00508359	0.0647602	DAB2, VAV3, VEGFA, TGM2, CX3CL1, ADAM8, CHRD	794	39	10723	2.42398	1	0.75955	70.7233
GOTERM_BP_DIRECT	GO:0033137~negative regulation of peptidyl-serine phosphorylation	5	0.00363113	0.064829	NCK2, NCK1, DMD, RASSF2, PDE4D	794	21	10723	3.21549	1	0.757878	70.7628
GOTERM_BP_DIRECT	GO:0048593~camera-type eye morphogenesis	5	0.00363113	0.064829	VEGFA, SKI, BMP7, EPHB1, EPHB2	794	21	10723	3.21549	1	0.757878	70.7628
GOTERM_BP_DIRECT	GO:1990138~neuron projection extension	5	0.00363113	0.064829	ALCAM, FLRT3, SEMA5B, FLRT1, NRN1	794	21	10723	3.21549	1	0.757878	70.7628
GOTERM_MF_DIRECT	GO:0043295~glutathione binding	4	0.00290491	0.065536	GSTM4, PTGES, LTC4S, GSTM5	761	13	10304	4.16618	1	0.782751	65.4706
UP_SEQ_FEATURE	domain:VWFC 1	3	0.00217868	0.0655464	FRAS1, CHRD, CRIM1	814	6	11138	6.84152	1	0.92621	69.2843
UP_SEQ_FEATURE	domain:VWFC 3	3	0.00217868	0.0655464	FRAS1, CHRD, CRIM1	814	6	11138	6.84152	1	0.92621	69.2843
UP_SEQ_FEATURE	domain:Laminin G-like	3	0.00217868	0.0655464	FAT3, SLIT1, SLIT2	814	6	11138	6.84152	1	0.92621	69.2843
UP_SEQ_FEATURE	domain:VWFC 2	3	0.00217868	0.0655464	FRAS1, CHRD, CRIM1	814	6	11138	6.84152	1	0.92621	69.2843
GOTERM_BP_DIRECT	GO:0048566~embryonic digestive tract development	4	0.00290491	0.0659651	GLI2, PCSK5, ADA, TGFB2	794	13	10723	4.1554	1	0.762002	71.4076
GOTERM_BP_DIRECT	GO:0061351~neural precursor cell proliferation	4	0.00290491	0.0659651	PAX6, DBN1, IFT88, EPHB1	794	13	10723	4.1554	1	0.762002	71.4076
GOTERM_BP_DIRECT	GO:0051145~smooth muscle cell differentiation	4	0.00290491	0.0659651	WNT7B, WNT4, NTF3, GATA6	794	13	10723	4.1554	1	0.762002	71.4076
GOTERM_BP_DIRECT	GO:0014912~negative regulation of smooth muscle cell migration	4	0.00290491	0.0659651	SEMA6D, IGFBP3, SLIT2, IGFBP5	794	13	10723	4.1554	1	0.762002	71.4076
GOTERM_BP_DIRECT	GO:0033690~positive regulation of osteoblast proliferation	4	0.00290491	0.0659651	GATA1, BMP2, LTF, SOX8	794	13	10723	4.1554	1	0.762002	71.4076
GOTERM_BP_DIRECT	GO:0050804~modulation of synaptic transmission	4	0.00290491	0.0659651	NTF3, DRD4, PPP3CA, PXK	794	13	10723	4.1554	1	0.762002	71.4076
GOTERM_BP_DIRECT	GO:0048565~digestive tract development	6	0.00435736	0.0666724	FGFR2, GATA1, GATA6, COL3A1, TGFB3, DCHS1	794	30	10723	2.70101	1	0.763756	71.8023
GOTERM_MF_DIRECT	GO:0048495~Roundabout binding	3	0.00217868	0.0667831	TGFB1I1, SLIT1, SLIT2	761	6	10304	6.77004	1	0.781417	66.1865
GOTERM_MF_DIRECT	GO:0005243~gap junction channel activity	3	0.00217868	0.0667831	GJA1, GJB2, GJC1	761	6	10304	6.77004	1	0.781417	66.1865
GOTERM_MF_DIRECT	GO:0005104~fibroblast growth factor receptor binding	3	0.00217868	0.0667831	FLRT3, FGF18, FLRT1	761	6	10304	6.77004	1	0.781417	66.1865
GOTERM_MF_DIRECT	GO:0005229~intracellular calcium activated chloride channel activity	3	0.00217868	0.0667831	ANO4, ANO8, ANO10	761	6	10304	6.77004	1	0.781417	66.1865
GOTERM_MF_DIRECT	GO:0038191~neuropilin binding	3	0.00217868	0.0667831	SEMA3G, SEMA7A, SEMA3C	761	6	10304	6.77004	1	0.781417	66.1865
GOTERM_MF_DIRECT	GO:0051371~muscle alpha-actinin binding	3	0.00217868	0.0667831	LDB3, SYNPO2, PKD2L1	761	6	10304	6.77004	1	0.781417	66.1865
GOTERM_BP_DIRECT	GO:0002523~leukocyte migration involved in inflammatory response	3	0.00217868	0.0671036	CX3CL1, ADAM8, AOC3	794	6	10723	6.75252	1	0.764032	72.0404
GOTERM_BP_DIRECT	GO:0071321~cellular response to cGMP	3	0.00217868	0.0671036	HCN2, SLC6A4, HCN4	794	6	10723	6.75252	1	0.764032	72.0404
GOTERM_BP_DIRECT	GO:0043569~negative regulation of insulin-like growth factor receptor signaling pathway	3	0.00217868	0.0671036	ATXN1, BMP2, IGFBP5	794	6	10723	6.75252	1	0.764032	72.0404
GOTERM_BP_DIRECT	GO:0046850~regulation of bone remodeling	3	0.00217868	0.0671036	FGFR3, GJA1, SYT7	794	6	10723	6.75252	1	0.764032	72.0404
GOTERM_BP_DIRECT	GO:0060687~regulation of branching involved in prostate gland morphogenesis	3	0.00217868	0.0671036	FGFR2, SFRP1, BMP7	794	6	10723	6.75252	1	0.764032	72.0404
GOTERM_BP_DIRECT	GO:0033089~positive regulation of T cell differentiation in thymus	3	0.00217868	0.0671036	GLI2, ADAM8, ADA	794	6	10723	6.75252	1	0.764032	72.0404
GOTERM_BP_DIRECT	GO:0032230~positive regulation of synaptic transmission, GABAergic	3	0.00217868	0.0671036	ADORA2A, PRKCE, CAR2	794	6	10723	6.75252	1	0.764032	72.0404
GOTERM_BP_DIRECT	GO:0010226~response to lithium ion	3	0.00217868	0.0671036	PTGS2, ACTA1, IGFBP2	794	6	10723	6.75252	1	0.764032	72.0404
GOTERM_BP_DIRECT	GO:0033689~negative regulation of osteoblast proliferation	3	0.00217868	0.0671036	SFRP1, BCL2, SMAD3	794	6	10723	6.75252	1	0.764032	72.0404
GOTERM_BP_DIRECT	GO:0019530~taurine metabolic process	3	0.00217868	0.0671036	PHGDH, CDO1, GHR	794	6	10723	6.75252	1	0.764032	72.0404
GOTERM_BP_DIRECT	GO:0030326~embryonic limb morphogenesis	8	0.00580982	0.0671304	FRAS1, WNT5A, CYP26B1, SKI, PBX1, MBNL1, BMP7, TGFB2	794	49	10723	2.2049	1	0.762184	72.055
UP_SEQ_FEATURE	metal ion-binding site:Zinc; catalytic	10	0.00726227	0.0672603	ECE1, ADAMTS8, ECEL1, PAPPA, ADAMTS10, MMP17, MME, ADAM8, ADAMTS2, CAR2	814	70	11138	1.95472	1	0.928047	70.2506
GOTERM_BP_DIRECT	GO:0040008~regulation of growth	9	0.00653604	0.0675106	ENOX2, GPC3, TMEM8B, IGFBP2, IGFBP3, TSPYL5, GAS6, CISH, IGFBP5	794	59	10723	2.06009	1	0.762202	72.2633
GOTERM_BP_DIRECT	GO:0043547~positive regulation of GTPase activity	13	0.00944095	0.0687396	WNT5A, RAP1GAP, ARHGEF5, RTN4R, CX3CL1, CCL7, RGS10, WNT4, ADRB1, PKP4, RASGRP2, RAPGEF3, KALRN	794	101	10723	1.73827	1	0.766605	72.9264
INTERPRO	IPR006911:Armadillo repeat-containing domain	3	0.00217868	0.069207	BHLHB9, GPRASP1, ARMCX4	874	6	11604	6.63844	1	0.791376	69.1061
INTERPRO	IPR017857:Coagulation factor, subgroup, Gla domain	3	0.00217868	0.069207	PRRG4, PRRG1, GAS6	874	6	11604	6.63844	1	0.791376	69.1061
INTERPRO	IPR014715:Fibrinogen, alpha/beta/gamma chain, C-terminal globular, subdomain 2	3	0.00217868	0.069207	TNC, FIBCD1, ANGPTL2	874	6	11604	6.63844	1	0.791376	69.1061
INTERPRO	IPR007632:Anoctamin/TMEM 16	3	0.00217868	0.069207	ANO4, ANO8, ANO10	874	6	11604	6.63844	1	0.791376	69.1061
UP_SEQ_FEATURE	metal ion-binding site:Calcium 2	6	0.00435736	0.0716257	NPTX1, SYT11, COLEC12, PRKCG, SYT7, AOC3	814	31	11138	2.64833	1	0.93685	72.584
GOTERM_BP_DIRECT	GO:0032526~response to retinoic acid	7	0.00508359	0.071652	PTGES, PPARG, IGFBP2, AQP3, KLF4, MEST, BMP6	794	40	10723	2.36338	1	0.779165	74.4384
GOTERM_MF_DIRECT	GO:0004930~G-protein coupled receptor activity	13	0.00944095	0.0717693	ADORA2A, PTH1R, DRD4, MRGPRE, CXCR2, GPRC5B, FZD5, SFRP5, EDNRB, ADRB1, CHRM4, SFRP1, GPR50	761	102	10304	1.7257	1	0.798348	68.9123
GOTERM_BP_DIRECT	GO:0050731~positive regulation of peptidyl-tyrosine phosphorylation	9	0.00653604	0.0731063	GATA1, FGFR3, NRP1, NTF3, VEGFA, EFNA5, KITL, CD74, GHR	794	60	10723	2.02576	1	0.784205	75.1632
INTERPRO	IPR008979:Galactose-binding domain-like	9	0.00653604	0.0731363	NRP2, NRP1, CPXM1, F8, CNTNAP2, PCSK6, PCSK5, EPHB1, EPHB2	874	59	11604	2.02529	1	0.804637	71.1741
GOTERM_CC_DIRECT	GO:0005884~actin filament	9	0.00653604	0.0744054	ACTA1, MYO1B, AIF1L, RHOQ, LMOD1, DBN1, FLNA, PLS3, GDPD2	849	60	11424	2.01837	1	0.516689	67.0422
GOTERM_CC_DIRECT	GO:0030141~secretory granule	9	0.00653604	0.0744054	CTSL, ECE1, VEGFA, TGFB3, LTF, SCG5, THBS1, PCSK5, TGFB2	849	60	11424	2.01837	1	0.516689	67.0422
UP_SEQ_FEATURE	repeat:LRR 8	9	0.00653604	0.074426	LRRC4, SLITRK4, LINGO3, RTN4RL1, LRRN4, LRCH2, RTN4R, SLIT1, SLIT2	814	61	11138	2.01881	1	0.940833	73.9888
GOTERM_BP_DIRECT	GO:0008543~fibroblast growth factor receptor signaling pathway	5	0.00363113	0.0747933	FGFR2, FLRT3, FGF18, FLRT1, FGFR3	794	22	10723	3.06933	1	0.790147	75.9796
GOTERM_BP_DIRECT	GO:0030325~adrenal gland development	5	0.00363113	0.0747933	WNT4, LY6E, PBX1, MDK, WT1	794	22	10723	3.06933	1	0.790147	75.9796
GOTERM_BP_DIRECT	GO:0006906~vesicle fusion	6	0.00435736	0.0748799	VAV3, SYT11, VAMP5, SYT8, DOC2G, SYT13	794	31	10723	2.61388	1	0.788694	76.0208
GOTERM_BP_DIRECT	GO:0019233~sensory perception of pain	6	0.00435736	0.0748799	EDNRB, ADRB1, PTGS2, UCHL1, CHRNA4, MME	794	31	10723	2.61388	1	0.788694	76.0208
GOTERM_BP_DIRECT	GO:0033077~T cell differentiation in thymus	6	0.00435736	0.0748799	WNT4, MPZL2, BCL11B, BCL2, RIPK3, FZD5	794	31	10723	2.61388	1	0.788694	76.0208
GOTERM_BP_DIRECT	GO:0030513~positive regulation of BMP signaling pathway	6	0.00435736	0.0748799	HES1, ACVRL1, GPC3, GATA6, SOX11, ENG	794	31	10723	2.61388	1	0.788694	76.0208
UP_SEQ_FEATURE	domain:Kazal-like	4	0.00290491	0.0770643	SMOC2, HTRA1, SPOCK2, SLCO3A1	814	14	11138	3.90944	1	0.944115	75.25
UP_SEQ_FEATURE	metal ion-binding site:Calcium 3	4	0.00290491	0.0770643	SYT11, COLEC12, PRKCG, SYT7	814	14	11138	3.90944	1	0.944115	75.25
UP_SEQ_FEATURE	domain:Ig-like	4	0.00290491	0.0770643	LRRC4, UNC5B, UNC5A, NEXN	814	14	11138	3.90944	1	0.944115	75.25
UP_SEQ_FEATURE	metal ion-binding site:Magnesium or manganese	4	0.00290491	0.0770643	NUDT19, NUDT8, IDH1, NUDT11	814	14	11138	3.90944	1	0.944115	75.25
GOTERM_BP_DIRECT	GO:0006955~immune response	10	0.00726227	0.0770724	TNFRSF1A, SUSD2, SMAD3, COLEC12, CX3CL1, THBS1, NRADD, CCL7, CD74, BMP6	794	71	10723	1.90212	1	0.796663	77.0423
GOTERM_BP_DIRECT	GO:0001701~in utero embryonic development	25	0.0181557	0.077087	FGFR2, BMP2, GDF1, ACVRL1, TGFB3, GJA1, SMAD3, MBNL1, GLI2, NRADD, SOX8, SLIT2, ADA, ASCL2, HES1, GATA1, DAB2, WNT7B, LY6E, GATA6, VEGFA, APBA3, TCTN1, HCN4, SEC24D	794	239	10723	1.41266	1	0.794919	77.049
GOTERM_CC_DIRECT	GO:0008021~synaptic vesicle	12	0.00871472	0.0779753	SYP, CTTNBP2, CADM1, SYT11, PDE4B, MME, BRSK1, SYT7, SYNGR1, SLC40A1, SYNGR3, AMPH	849	92	11424	1.75511	1	0.527175	68.8207
GOTERM_MF_DIRECT	GO:0004197~cysteine-type endopeptidase activity	7	0.00508359	0.0781431	CTSL, SFRP1, ATG4C, UCHL1, CTSR, CTSC, CTSF	761	41	10304	2.31172	1	0.819221	72.0974
INTERPRO	IPR008952:Tetraspanin, EC2 domain	5	0.00363113	0.0786565	TSPAN2, CD82, TSPAN5, TSPAN15, TSPAN18	874	22	11604	3.01747	1	0.823312	73.8607
INTERPRO	IPR000301:Tetraspanin	5	0.00363113	0.0786565	TSPAN2, CD82, TSPAN5, TSPAN15, TSPAN18	874	22	11604	3.01747	1	0.823312	73.8607
GOTERM_BP_DIRECT	GO:0030900~forebrain development	9	0.00653604	0.0789747	NOTCH3, APP, KDM2B, FGFR3, EMX2, PAX6, CNP, CHRD, NFIB	794	61	10723	1.99255	1	0.801271	77.8951
INTERPRO	IPR000859:CUB domain	6	0.00435736	0.0793828	NRP2, NRP1, LRP10, SCUBE1, ST14, CDCP1	874	31	11604	2.56972	1	0.821419	74.1962
GOTERM_BP_DIRECT	GO:0007599~hemostasis	4	0.00290491	0.0795034	ANXA8, F3, F8, TFPI	794	14	10723	3.85858	1	0.801735	78.1268
GOTERM_BP_DIRECT	GO:0006882~cellular zinc ion homeostasis	4	0.00290491	0.0795034	SLC39A14, MT2, SLC39A8, SLC39A4	794	14	10723	3.85858	1	0.801735	78.1268
GOTERM_BP_DIRECT	GO:0042993~positive regulation of transcription factor import into nucleus	4	0.00290491	0.0795034	MAVS, PRKD1, SMAD3, FLNA	794	14	10723	3.85858	1	0.801735	78.1268
GOTERM_BP_DIRECT	GO:0030705~cytoskeleton-dependent intracellular transport	4	0.00290491	0.0795034	KIF1A, KIF5C, KIF13B, KIF26B	794	14	10723	3.85858	1	0.801735	78.1268
GOTERM_BP_DIRECT	GO:0003203~endocardial cushion morphogenesis	4	0.00290491	0.0795034	BMP2, ACVRL1, ENG, TGFB2	794	14	10723	3.85858	1	0.801735	78.1268
GOTERM_BP_DIRECT	GO:0061178~regulation of insulin secretion involved in cellular response to glucose stimulus	4	0.00290491	0.0795034	HMGN3, ADCY5, EFNA5, PRKCE	794	14	10723	3.85858	1	0.801735	78.1268
UP_SEQ_FEATURE	domain:Ig-like C2-type 4	6	0.00435736	0.0800341	NCAM1, IGSF8, IGSF3, CNTN2, BOC, CSF1R	814	32	11138	2.56557	1	0.947804	76.6006
GOTERM_CC_DIRECT	GO:0031526~brush border membrane	7	0.00508359	0.0800967	PTH1R, CYBRD1, SLC5A6, SLC22A5, RAPGEF3, SHANK2, SLC46A1	849	41	11424	2.29734	1	0.530468	69.8348
UP_SEQ_FEATURE	short sequence motif:Selectivity filter	5	0.00363113	0.0823258	KCNC1, KCNQ5, KCNJ10, KCNH2, KCNH3	814	23	11138	2.97458	1	0.94989	77.5951
UP_SEQ_FEATURE	region of interest:Head	5	0.00363113	0.0823258	NES, BFSP1, SYNM, KRT20, NEFL	814	23	11138	2.97458	1	0.94989	77.5951
INTERPRO	IPR013273:Peptidase M12B, ADAM-TS	4	0.00290491	0.0828262	ADAMTS8, ADAMTSL3, ADAMTS10, ADAMTS2	874	14	11604	3.7934	1	0.830187	75.7322
INTERPRO	IPR011641:Tyrosine-protein kinase ephrin type A/B receptor-like	4	0.00290491	0.0828262	SVEP1, SCUBE1, EPHB1, EPHB2	874	14	11604	3.7934	1	0.830187	75.7322
INTERPRO	IPR006586:ADAM, cysteine-rich	4	0.00290491	0.0828262	ADAMTS8, ADAM23, ADAM22, ADAM8	874	14	11604	3.7934	1	0.830187	75.7322
INTERPRO	IPR008422:Homeobox KN domain	4	0.00290491	0.0828262	PKNOX2, IRX5, HOMEZ, MEIS1	874	14	11604	3.7934	1	0.830187	75.7322
INTERPRO	IPR013128:Peptidase C1A, papain	4	0.00290491	0.0828262	CTSL, CTSR, CTSC, CTSF	874	14	11604	3.7934	1	0.830187	75.7322
GOTERM_BP_DIRECT	GO:0030177~positive regulation of Wnt signaling pathway	6	0.00435736	0.0836088	FGFR2, BMP2, SULF2, SFRP1, SOX4, ZEB2	794	32	10723	2.53219	1	0.81661	79.849
GOTERM_BP_DIRECT	GO:0000122~negative regulation of transcription from RNA polymerase II promoter	52	0.0377638	0.0838986	BACH2, CPEB3, PPARG, FST, ZEB2, ANKRD1, GLI2, KANK2, GATA1, EDNRB, PCBP3, GATA6, HOMEZ, ATF7IP, CTBP2, SOX11, ZHX2, ASCL2, HES1, CCND1, KDM2B, BTG2, DLL4, VEGFA, FGFR2, EID1, FRK, FGFR3, GLIS1, NFIX, CXXC5, WT1, HIC1, NRARP, BCL6, ZFP217, TCF4, MAF, CEBPA, BMP2, SMAD3, SKI, NOTCH3, ATXN1, PLK3, ID2, ID1, JAZF1, ID3, KLF4, BMP6, NFIB	794	568	10723	1.23638	1	0.81604	79.9656
GOTERM_MF_DIRECT	GO:0005201~extracellular matrix structural constituent	5	0.00363113	0.0848227	LAMA1, COL3A1, FBN1, ACAN, VCAN	761	23	10304	2.9435	1	0.838435	75.1058
UP_SEQ_FEATURE	repeat:LRR 5	12	0.00871472	0.085008	LRRC4, ELFN1, ELFN2, SLITRK4, LINGO3, RTN4RL1, LRRN4, LRCH2, RTN4R, TPBG, SLIT1, SLIT2	814	95	11138	1.72838	1	0.952541	78.7084
GOTERM_BP_DIRECT	GO:0046676~negative regulation of insulin secretion	5	0.00363113	0.0854802	SFRP1, PDE8B, PPP3CA, IRS1, ABCC8	794	23	10723	2.93588	1	0.820412	80.5908
GOTERM_BP_DIRECT	GO:0001654~eye development	5	0.00363113	0.0854802	ATF6, BMP7, IFT88, TGFB2, BMP6	794	23	10723	2.93588	1	0.820412	80.5908
GOTERM_BP_DIRECT	GO:0042102~positive regulation of T cell proliferation	5	0.00363113	0.0854802	HES1, NCK2, NCK1, ADK, JAK3	794	23	10723	2.93588	1	0.820412	80.5908
GOTERM_BP_DIRECT	GO:0001958~endochondral ossification	5	0.00363113	0.0854802	ALPL, FGF18, NAB2, SCX, BMP6	794	23	10723	2.93588	1	0.820412	80.5908
GOTERM_BP_DIRECT	GO:0032570~response to progesterone	5	0.00363113	0.0854802	CLDN4, TGFB3, FOSB, TGFB2, GJB2	794	23	10723	2.93588	1	0.820412	80.5908
GOTERM_BP_DIRECT	GO:0048844~artery morphogenesis	5	0.00363113	0.0854802	NOTCH3, HES1, NRP1, VEGFA, ENG	794	23	10723	2.93588	1	0.820412	80.5908
GOTERM_BP_DIRECT	GO:0030890~positive regulation of B cell proliferation	5	0.00363113	0.0854802	VAV3, BCL2, BCL6, CD74, ADA	794	23	10723	2.93588	1	0.820412	80.5908
GOTERM_BP_DIRECT	GO:0009611~response to wounding	7	0.00508359	0.0866454	NRP1, SULF2, SYT11, PAX6, ID3, MDK, TGFB2	794	42	10723	2.25084	1	0.823109	81.0395
GOTERM_BP_DIRECT	GO:0002376~immune system process	20	0.0145245	0.0866964	MAVS, APOBEC3, IFIH1, HMGB3, CADM1, MYO1G, TFEB, PRKCE, CD74, ISG20, PRKD1, ALCAM, SERINC5, ETS1, PSTPIP1, LTF, BCL6, LBP, JAK3, CSF1R	794	184	10723	1.46794	1	0.821652	81.0589
UP_SEQ_FEATURE	domain:EGF-like 16; calcium-binding	3	0.00217868	0.0874238	NOTCH3, LTBP1, FBN1	814	7	11138	5.86416	1	0.954545	79.6662
UP_SEQ_FEATURE	domain:Sushi	3	0.00217868	0.0874238	SUSD2, ACAN, VCAN	814	7	11138	5.86416	1	0.954545	79.6662
GOTERM_MF_DIRECT	GO:0070700~BMP receptor binding	3	0.00217868	0.0890289	BMP2, BMP7, BMP6	761	7	10304	5.80289	1	0.846919	76.8414
GOTERM_MF_DIRECT	GO:0017128~phospholipid scramblase activity	3	0.00217868	0.0890289	ANO4, ANO8, ANO10	761	7	10304	5.80289	1	0.846919	76.8414
GOTERM_MF_DIRECT	GO:0005114~type II transforming growth factor beta receptor binding	3	0.00217868	0.0890289	TGFB3, ENG, TGFB2	761	7	10304	5.80289	1	0.846919	76.8414
GOTERM_MF_DIRECT	GO:0008009~chemokine activity	3	0.00217868	0.0890289	CXCL16, CX3CL1, CCL7	761	7	10304	5.80289	1	0.846919	76.8414
GOTERM_MF_DIRECT	GO:0031995~insulin-like growth factor II binding	3	0.00217868	0.0890289	IGFBP2, IGFBP3, IGFBP5	761	7	10304	5.80289	1	0.846919	76.8414
GOTERM_BP_DIRECT	GO:0035235~ionotropic glutamate receptor signaling pathway	3	0.00217868	0.0894442	CDK5R1, APP, ATP1A3	794	7	10723	5.78787	1	0.829978	82.0777
GOTERM_BP_DIRECT	GO:2001046~positive regulation of integrin-mediated signaling pathway	3	0.00217868	0.0894442	DAB2, LIMS2, FLNA	794	7	10723	5.78787	1	0.829978	82.0777
GOTERM_BP_DIRECT	GO:0010837~regulation of keratinocyte proliferation	3	0.00217868	0.0894442	PRKD1, OVOL2, BCL11B	794	7	10723	5.78787	1	0.829978	82.0777
GOTERM_BP_DIRECT	GO:0045687~positive regulation of glial cell differentiation	3	0.00217868	0.0894442	HES1, NTF3, SPINT1	794	7	10723	5.78787	1	0.829978	82.0777
GOTERM_BP_DIRECT	GO:0060710~chorio-allantoic fusion	3	0.00217868	0.0894442	WNT7B, ITGA4, BMP7	794	7	10723	5.78787	1	0.829978	82.0777
GOTERM_BP_DIRECT	GO:0003344~pericardium morphogenesis	3	0.00217868	0.0894442	WNT5A, DLL4, BMP7	794	7	10723	5.78787	1	0.829978	82.0777
GOTERM_BP_DIRECT	GO:0022010~central nervous system myelination	3	0.00217868	0.0894442	FGFR3, CNTN2, KCNJ10	794	7	10723	5.78787	1	0.829978	82.0777
GOTERM_BP_DIRECT	GO:0070307~lens fiber cell development	3	0.00217868	0.0894442	FGFR2, FGFR3, BFSP1	794	7	10723	5.78787	1	0.829978	82.0777
GOTERM_BP_DIRECT	GO:0060068~vagina development	3	0.00217868	0.0894442	WNT5A, TYRO3, MERTK	794	7	10723	5.78787	1	0.829978	82.0777
GOTERM_BP_DIRECT	GO:0035912~dorsal aorta morphogenesis	3	0.00217868	0.0894442	ACVRL1, DLL4, ENG	794	7	10723	5.78787	1	0.829978	82.0777
GOTERM_BP_DIRECT	GO:0043032~positive regulation of macrophage activation	3	0.00217868	0.0894442	WNT5A, LBP, THBS1	794	7	10723	5.78787	1	0.829978	82.0777
GOTERM_BP_DIRECT	GO:0035239~tube morphogenesis	3	0.00217868	0.0894442	WNT4, GATA6, BMP7	794	7	10723	5.78787	1	0.829978	82.0777
GOTERM_BP_DIRECT	GO:0060563~neuroepithelial cell differentiation	3	0.00217868	0.0894442	SOX11, SOX4, CDH2	794	7	10723	5.78787	1	0.829978	82.0777
GOTERM_BP_DIRECT	GO:0072089~stem cell proliferation	3	0.00217868	0.0894442	RNF43, NES, WNT7B	794	7	10723	5.78787	1	0.829978	82.0777
GOTERM_BP_DIRECT	GO:0060485~mesenchyme development	3	0.00217868	0.0894442	BMP2, ITGA4, BMP7	794	7	10723	5.78787	1	0.829978	82.0777
GOTERM_BP_DIRECT	GO:0043568~positive regulation of insulin-like growth factor receptor signaling pathway	3	0.00217868	0.0894442	IGFBP3, IFT88, IGFBP5	794	7	10723	5.78787	1	0.829978	82.0777
GOTERM_BP_DIRECT	GO:0060426~lung vasculature development	3	0.00217868	0.0894442	ID1, VEGFA, IFT88	794	7	10723	5.78787	1	0.829978	82.0777
INTERPRO	IPR001664:Intermediate filament protein	5	0.00363113	0.0898078	NES, BFSP1, SYNM, KRT20, NEFL	874	23	11604	2.88628	1	0.85051	78.5869
INTERPRO	IPR018499:Tetraspanin/Peripherin	5	0.00363113	0.0898078	TSPAN2, CD82, TSPAN5, TSPAN15, TSPAN18	874	23	11604	2.88628	1	0.85051	78.5869
GOTERM_CC_DIRECT	GO:0032279~asymmetric synapse	3	0.00217868	0.0900332	CHRM4, ADORA2A, DBN1	849	7	11424	5.76678	1	0.567785	74.1895
INTERPRO	IPR002048:EF-hand domain	16	0.0116196	0.0907064	TESC, NKD1, NKD2, NCS1, NECAB3, PKD2L1, MYL9, RAB11FIP4, SMOC2, RASGRP2, AIF1L, RYR2, CALM3, RHBDL3, EHD2, PLS3	874	137	11604	1.55059	1	0.849201	78.9306
UP_SEQ_FEATURE	glycosylation site:O-linked (GalNAc...)	4	0.00290491	0.0913072	SMAGP, DLK1, FGFBP1, AOC3	814	15	11138	3.64881	1	0.958698	81.1214
INTERPRO	IPR011598:Myc-type, basic helix-loop-helix (bHLH) domain	9	0.00653604	0.0919153	HES1, ASCL2, TCFL5, ID2, ID1, TFEB, ID3, TCF4, SCX	874	62	11604	1.92729	1	0.848939	79.3847
GOTERM_MF_DIRECT	GO:0030414~peptidase inhibitor activity	6	0.00435736	0.0920317	APP, GPC3, COL7A1, TFPI, SPINT1, TIMP3	761	33	10304	2.46183	1	0.850843	78.0104
GOTERM_CC_DIRECT	GO:0005923~bicellular tight junction	11	0.0079885	0.0920539	CCND1, OCLN, MAGI1, CLDN4, CLDN3, WNK4, FZD5, PMP22, CXADR, CLDN23, SYNPO	849	84	11424	1.76207	1	0.569697	75.0002
INTERPRO	IPR006187:Claudin	3	0.00217868	0.0921691	CLDN4, CLDN3, CLDN23	874	7	11604	5.69009	1	0.84558	79.4788
INTERPRO	IPR018488:Cyclic nucleotide-binding, conserved site	3	0.00217868	0.0921691	HCN2, PRKAR2A, HCN4	874	7	11604	5.69009	1	0.84558	79.4788
INTERPRO	IPR003645:Follistatin-like, N-terminal	3	0.00217868	0.0921691	FST, SLIT1, SLIT2	874	7	11604	5.69009	1	0.84558	79.4788
INTERPRO	IPR000294:Gamma-carboxyglutamic acid-rich (GLA) domain	3	0.00217868	0.0921691	PRRG4, PRRG1, GAS6	874	7	11604	5.69009	1	0.84558	79.4788
UP_SEQ_FEATURE	metal ion-binding site:Calcium	5	0.00363113	0.0933558	SULF2, TGM1, TGM2, ARSA, GAS6	814	24	11138	2.85063	1	0.959804	81.8489
UP_SEQ_FEATURE	region of interest:Tail	5	0.00363113	0.0933558	NES, BFSP1, SYNM, KRT20, NEFL	814	24	11138	2.85063	1	0.959804	81.8489
GOTERM_MF_DIRECT	GO:0043621~protein self-association	7	0.00508359	0.0938037	ATXN1, ID1, PTH1R, CNTN2, RYR2, CTSC, TCF4	761	43	10304	2.2042	1	0.850676	78.6741
GOTERM_BP_DIRECT	GO:0035690~cellular response to drug	8	0.00580982	0.0938693	PDE4B, QDPR, PRKAA2, PPP3CA, ANKRD1, RNF149, KCNH2, GAS6	794	53	10723	2.0385	1	0.843404	83.61
GOTERM_BP_DIRECT	GO:0034220~ion transmembrane transport	4	0.00290491	0.0941329	ANXA6, RYR2, GJA1, AQP3	794	15	10723	3.60134	1	0.842727	83.6973
GOTERM_BP_DIRECT	GO:0007422~peripheral nervous system development	4	0.00290491	0.0941329	EDNRB, NTF3, ARTN, SOX8	794	15	10723	3.60134	1	0.842727	83.6973
GOTERM_BP_DIRECT	GO:0045780~positive regulation of bone resorption	4	0.00290491	0.0941329	LTBP3, ADAM8, CAR2, PPARGC1B	794	15	10723	3.60134	1	0.842727	83.6973
GOTERM_BP_DIRECT	GO:0048596~embryonic camera-type eye morphogenesis	4	0.00290491	0.0941329	KDM2B, PAX6, FZD5, BMP7	794	15	10723	3.60134	1	0.842727	83.6973
GOTERM_BP_DIRECT	GO:0016055~Wnt signaling pathway	18	0.0130721	0.0942358	WNT5A, NKD1, NKD2, TLE2, APCDD1, FZD5, HIC1, SFRP5, RNF43, DAB2, WNT4, WNT7B, CCND1, WISP1, SFRP1, NXN, PRKAA2, TGFB1I1	794	163	10723	1.49135	1	0.841532	83.7312
GOTERM_CC_DIRECT	GO:0031594~neuromuscular junction	7	0.00508359	0.0960727	CDK5R1, APP, EFNA2, PDZRN3, FCHSD1, SYNGR1, SYNGR3	849	43	11424	2.19048	1	0.579591	76.5426
GOTERM_MF_DIRECT	GO:0004857~enzyme inhibitor activity	5	0.00363113	0.0961336	APBA3, SCG5, TIMP3, GCHFR, CRIM1	761	24	10304	2.82085	1	0.852262	79.5182
GOTERM_BP_DIRECT	GO:0006811~ion transport	30	0.0217868	0.096631	SLC39A14, KCNC1, ATP1B1, GRIK3, SFXN3, GRIK5, KCNJ10, KCNQ5, WNK4, SLC39A8, CHRNA4, LTF, SLC22A3, SLC22A5, SLCO3A1, HCN4, SLC39A4, HCN2, CACNA2D1, TMC8, ATP1A3, PKD2L1, CLIC5, SLC41A2, RYR2, SLC5A6, KCNH2, SLC40A1, KCNH3, SCARA5	794	305	10723	1.32836	1	0.847659	84.5027
GOTERM_BP_DIRECT	GO:0045747~positive regulation of Notch signaling pathway	5	0.00363113	0.096864	HES1, DLL4, TSPAN5, JAG1, TSPAN15	794	24	10723	2.81355	1	0.846896	84.5759
GOTERM_CC_DIRECT	GO:0032420~stereocilium	5	0.00363113	0.0979029	CLIC5, ZSWIM6, SLC9A3R2, PLS3, CDH23	849	24	11424	2.8033	1	0.580493	77.2152
INTERPRO	IPR010294:ADAM-TS Spacer 1	4	0.00290491	0.0979763	ADAMTS8, THSD4, ADAMTS10, ADAMTS2	874	15	11604	3.5405	1	0.859647	81.5262
INTERPRO	IPR004031:PMP-22/EMP/MP20/Claudin	4	0.00290491	0.0979763	CLDN4, CLDN3, PMP22, CLDN23	874	15	11604	3.5405	1	0.859647	81.5262
GOTERM_BP_DIRECT	GO:0006469~negative regulation of protein kinase activity	9	0.00653604	0.098212	LRRC4, FLRT3, FLRT1, RTN4RL1, ADORA2A, PRKAG2, RTN4R, GADD45B, CISH	794	64	10723	1.89915	1	0.849582	84.9928
UP_SEQ_FEATURE	short sequence motif:PDZ-binding	7	0.00508359	0.0984503	PRR7, ADRB1, EFNB2, FZD5, CXADR, EPHB1, EPHB2	814	44	11138	2.17685	1	0.964899	83.5452
