# Supplementary material for: BAP1/ASXL complex modulation regulates epithelial-mesenchymal transition during trophoblast differentiation and invasion
Source: eLife. 2021 Jun 25;10:e63254. doi: 10.7554/eLife.63254 (PMC8233037; doi:10.7554/eLife.63254)
Supplement: Supplementary file 3. [file elife-63254-supp3.xls]

## Sheet: DESeq2_and_RPKM FC>2_0D
1308 genes dysregulated in Bap1 overexpressing mTSCs growing in stem cell conditions (0D), called by both DESeq2 and FPKM fold change >2
Probe	Description	Fold change
4933402E13Rik	RIKEN cDNA 4933402E13 gene [Source:MGI Symbol;Acc:MGI:1921687]	80.4616
Rhox12	reproductive homeobox 12 [Source:MGI Symbol;Acc:MGI:2685994]	79.6353
Serpinb9d	serine (or cysteine) peptidase inhibitor, clade B, member 9d [Source:MGI Symbol;Acc:MGI:894667]	67.1411
Ccrl2	chemokine (C-C motif) receptor-like 2 [Source:MGI Symbol;Acc:MGI:1920904]	45.6705
Slc6a2	solute carrier family 6 (neurotransmitter transporter, noradrenalin), member 2 [Source:MGI Symbol;Acc:MGI:1270850]	45.6494
Ctsj	cathepsin J [Source:MGI Symbol;Acc:MGI:1349426]	45.0143
4932442L08Rik	RIKEN cDNA 4932442L08 gene [Source:MGI Symbol;Acc:MGI:1921682]	44.8305
Lrrc61	leucine rich repeat containing 61 [Source:MGI Symbol;Acc:MGI:2652848]	38.6671
Gm17067	predicted gene 17067 [Source:MGI Symbol;Acc:MGI:4937894]	37.2541
Prl8a9	prolactin family8, subfamily a, member 9 [Source:MGI Symbol;Acc:MGI:1914560]	34.2442
Wdr31	WD repeat domain 31 [Source:MGI Symbol;Acc:MGI:1918604]	33.4886
Wdr66	WD repeat domain 66 [Source:MGI Symbol;Acc:MGI:1918495]	32.0882
Ctsr	cathepsin R [Source:MGI Symbol;Acc:MGI:1861723]	32.0693
Chdh	choline dehydrogenase [Source:MGI Symbol;Acc:MGI:1860776]	31.8883
Serpinb9c	serine (or cysteine) peptidase inhibitor, clade B, member 9c [Source:MGI Symbol;Acc:MGI:894669]	27.0098
Rhox6	reproductive homeobox 6 [Source:MGI Symbol;Acc:MGI:1202888]	25.7714
Gpr116	G protein-coupled receptor 116 [Source:MGI Symbol;Acc:MGI:2182928]	25.6085
Isg15	ISG15 ubiquitin-like modifier [Source:MGI Symbol;Acc:MGI:1855694]	24.8978
1700003E16Rik	RIKEN cDNA 1700003E16 gene [Source:MGI Symbol;Acc:MGI:1919087]	24.8058
Arhgef6	Rac/Cdc42 guanine nucleotide exchange factor (GEF) 6 [Source:MGI Symbol;Acc:MGI:1920591]	23.9254
Nfasc	neurofascin [Source:MGI Symbol;Acc:MGI:104753]	22.9248
3632451O06Rik	RIKEN cDNA 3632451O06 gene [Source:MGI Symbol;Acc:MGI:1914669]	22.3817
Serpinb9f	serine (or cysteine) peptidase inhibitor, clade B, member 9f [Source:MGI Symbol;Acc:MGI:894671]	22.031
Ldoc1	leucine zipper, down-regulated in cancer 1 [Source:MGI Symbol;Acc:MGI:2685212]	21.924
Epha8	Eph receptor A8 [Source:MGI Symbol;Acc:MGI:109378]	21.2397
Tnfrsf9	tumor necrosis factor receptor superfamily, member 9 [Source:MGI Symbol;Acc:MGI:1101059]	21.0337
Ankrd29	ankyrin repeat domain 29 [Source:MGI Symbol;Acc:MGI:2687055]	20.9688
Usp18	ubiquitin specific peptidase 18 [Source:MGI Symbol;Acc:MGI:1344364]	20.9122
Fam176a	family with sequence similarity 176, member A [Source:MGI Symbol;Acc:MGI:2385247]	20.8692
Zfp608	zinc finger protein 608 [Source:MGI Symbol;Acc:MGI:2442338]	20.513
Zkscan2	zinc finger with KRAB and SCAN domains 2 [Source:MGI Symbol;Acc:MGI:2444060]	20.2228
Xdh	xanthine dehydrogenase [Source:MGI Symbol;Acc:MGI:98973]	19.5773
Emp1	epithelial membrane protein 1 [Source:MGI Symbol;Acc:MGI:107941]	19.0255
Tgm2	regulation of nuclear pre-mRNA domain containing 1B [Source:MGI Symbol;Acc:MGI:1917720]	18.8842
Pparg	peroxisome proliferator activated receptor gamma [Source:MGI Symbol;Acc:MGI:97747]	18.6635
Gm9	predicted gene 9 [Source:MGI Symbol;Acc:MGI:2684855]	18.0728
Igsf11	immunoglobulin superfamily, member 11 [Source:MGI Symbol;Acc:MGI:2388477]	18.0478
Rhox9	reproductive homeobox 9 [Source:MGI Symbol;Acc:MGI:1890128]	17.3564
Nos2	nitric oxide synthase 2, inducible [Source:MGI Symbol;Acc:MGI:97361]	17.3528
Trim29	tripartite motif-containing 29 [Source:MGI Symbol;Acc:MGI:1919419]	15.9282
Klk7	kallikrein related-peptidase 7 (chymotryptic, stratum corneum) [Source:MGI Symbol;Acc:MGI:1346336]	15.6517
Gbp2	guanylate binding protein 2 [Source:MGI Symbol;Acc:MGI:102772]	15.4533
Il2rb	interleukin 2 receptor, beta chain [Source:MGI Symbol;Acc:MGI:96550]	15.4409
Klrg2	killer cell lectin-like receptor subfamily G, member 2 [Source:MGI Symbol;Acc:MGI:1921503]	14.9638
Nfam1	Nfat activating molecule with ITAM motif 1 [Source:MGI Symbol;Acc:MGI:1921289]	14.718
Csf1r	colony stimulating factor 1 receptor [Source:MGI Symbol;Acc:MGI:1339758]	14.4053
Zbtb8b	zinc finger and BTB domain containing 8b [Source:MGI Symbol;Acc:MGI:2387181]	14.3041
Tgfb3	tubulin tyrosine ligase-like family, member 5 [Source:MGI Symbol;Acc:MGI:2443657]	14.1187
Doxl2	diamine oxidase-like protein 2 [Source:MGI Symbol;Acc:MGI:3618290]	14.0912
Nhs	Nance-Horan syndrome (human) [Source:MGI Symbol;Acc:MGI:2684894]	13.9883
Dkk1	dickkopf homolog 1 (Xenopus laevis) [Source:MGI Symbol;Acc:MGI:1329040]	13.8383
Sema6a	sema domain, transmembrane domain (TM), and cytoplasmic domain, (semaphorin) 6A [Source:MGI Symbol;Acc:MGI:1203727]	13.3561
Ephb6	Eph receptor B6 [Source:MGI Symbol;Acc:MGI:1096338]	13.0776
Slc6a12	solute carrier family 6 (neurotransmitter transporter, betaine/GABA), member 12 [Source:MGI Symbol;Acc:MGI:95628]	13.0524
Gm22	predicted gene 20388 [Source:MGI Symbol;Acc:MGI:5141853]	13.0053
Muc4	mucin 4 [Source:MGI Symbol;Acc:MGI:2153525]	12.9059
Nrk	Nik related kinase [Source:MGI Symbol;Acc:MGI:1351326]	12.7059
Atcay	RIKEN cDNA 2310050B05 gene [Source:MGI Symbol;Acc:MGI:1916928]	12.6251
Gpr126	G protein-coupled receptor 126 [Source:MGI Symbol;Acc:MGI:1916151]	12.4701
Efna5	ephrin A5 [Source:MGI Symbol;Acc:MGI:107444]	12.3823
Lepr	leptin receptor [Source:MGI Symbol;Acc:MGI:104993]	12.0834
AI429214	expressed sequence AI429214 [Source:MGI Symbol;Acc:MGI:2142538]	12.004
Pou2f3	POU domain, class 2, transcription factor 3 [Source:MGI Symbol;Acc:MGI:102565]	11.6041
Akr1b10	aldo-keto reductase family 1, member B10 (aldose reductase) [Source:MGI Symbol;Acc:MGI:1915111]	11.5255
Vgll1	vestigial like 1 homolog (Drosophila) [Source:MGI Symbol;Acc:MGI:2655768]	11.4978
Il18rap	interleukin 18 receptor accessory protein [Source:MGI Symbol;Acc:MGI:1338888]	11.4316
Sytl1	synaptotagmin-like 1 [Source:MGI Symbol;Acc:MGI:1933365]	11.3268
Plekha6	pleckstrin homology domain containing, family A member 6 [Source:MGI Symbol;Acc:MGI:2388662]	11.1704
Dnahc11	cell division cycle associated 7 like [Source:MGI Symbol;Acc:MGI:2384982]	11.0708
Hpgd	hydroxyprostaglandin dehydrogenase 15 (NAD) [Source:MGI Symbol;Acc:MGI:108085]	10.9333
Vgll3	vestigial like 3 (Drosophila) [Source:MGI Symbol;Acc:MGI:1920819]	10.9048
Gm684	predicted gene 684 [Source:MGI Symbol;Acc:MGI:2685530]	10.7943
Pdgfrb	platelet derived growth factor receptor, beta polypeptide [Source:MGI Symbol;Acc:MGI:97531]	10.6661
Chd3	chromodomain helicase DNA binding protein 3 [Source:MGI Symbol;Acc:MGI:1344395]	10.5676
C330005M16Rik	RIKEN cDNA C330005M16 gene [Source:MGI Symbol;Acc:MGI:2142121]	10.5136
1600014K23Rik	RIKEN cDNA 1600014K23 gene [Source:MGI Symbol;Acc:MGI:1919246]	10.4739
Slco5a1	solute carrier organic anion transporter family, member 5A1 [Source:MGI Symbol;Acc:MGI:2443431]	10.4319
Bhlhe41	basic helix-loop-helix family, member e41 [Source:MGI Symbol;Acc:MGI:1930704]	10.3662
Dnase1l3	deoxyribonuclease 1-like 3 [Source:MGI Symbol;Acc:MGI:1314633]	10.0164
Grem2	gremlin 2 homolog, cysteine knot superfamily (Xenopus laevis) [Source:MGI Symbol;Acc:MGI:1344367]	9.92212
Rab3il1	RAB3A interacting protein (rabin3)-like 1 [Source:MGI Symbol;Acc:MGI:1922010]	9.80608
Ahr	aryl-hydrocarbon receptor [Source:MGI Symbol;Acc:MGI:105043]	9.69936
Jazf1	JAZF zinc finger 1 [Source:MGI Symbol;Acc:MGI:2141450]	9.69784
Anxa1	annexin A1 [Source:MGI Symbol;Acc:MGI:96819]	9.67822
Apbb1ip	amyloid beta (A4) precursor protein-binding, family B, member 1 interacting protein [Source:MGI Symbol;Acc:MGI:1861354]	9.42849
Gpr50	G-protein-coupled receptor 50 [Source:MGI Symbol;Acc:MGI:1333877]	9.38074
Thbd	thrombomodulin [Source:MGI Symbol;Acc:MGI:98736]	9.26879
Mfi2	antigen p97 (melanoma associated) identified by monoclonal antibodies 133.2 and 96.5 [Source:MGI Symbol;Acc:MGI:1353421]	9.16826
Serpinb9b	serine (or cysteine) peptidase inhibitor, clade B, member 9b [Source:MGI Symbol;Acc:MGI:894668]	9.09337
Rab32	RAB32, member RAS oncogene family [Source:MGI Symbol;Acc:MGI:1915094]	9.00357
Sh3rf2	SH3 domain containing ring finger 2 [Source:MGI Symbol;Acc:MGI:2444628]	8.91528
Pnpla3	patatin-like phospholipase domain containing 3 [Source:MGI Symbol;Acc:MGI:2151796]	8.84305
Cttnbp2	cortactin binding protein 2 [Source:MGI Symbol;Acc:MGI:1353467]	8.76916
Slc34a2	solute carrier family 34 (sodium phosphate), member 2 [Source:MGI Symbol;Acc:MGI:1342284]	8.58244
Sec14l5	SEC14-like 5 (S. cerevisiae) [Source:MGI Symbol;Acc:MGI:3616084]	8.52834
Adamts1	a disintegrin-like and metallopeptidase (reprolysin type) with thrombospondin type 1 motif, 1 [Source:MGI Symbol;Acc:MGI:109249]	8.51358
Fam110c	family with sequence similarity 110, member C [Source:MGI Symbol;Acc:MGI:1918813]	8.4586
Adamts15	a disintegrin-like and metallopeptidase (reprolysin type) with thrombospondin type 1 motif, 15 [Source:MGI Symbol;Acc:MGI:2449569]	8.37661
Upk2	uroplakin 2 [Source:MGI Symbol;Acc:MGI:98913]	8.36888
Pkp2	plakophilin 2 [Source:MGI Symbol;Acc:MGI:1914701]	8.2986
Nr4a3	nuclear receptor subfamily 4, group A, member 3 [Source:MGI Symbol;Acc:MGI:1352457]	8.2793
B3gnt3	UDP-GlcNAc:betaGal beta-1,3-N-acetylglucosaminyltransferase 3 [Source:MGI Symbol;Acc:MGI:2152535]	8.16756
Nav3	neuron navigator 3 [Source:MGI Symbol;Acc:MGI:2183703]	8.14005
Slc16a4	solute carrier family 16 (monocarboxylic acid transporters), member 4 [Source:MGI Symbol;Acc:MGI:2385183]	8.02722
Rps6ka6	ribosomal protein S6 kinase polypeptide 6 [Source:MGI Symbol;Acc:MGI:1914321]	8.00527
Cxcr2	chemokine (C-X-C motif) receptor 2 [Source:MGI Symbol;Acc:MGI:105303]	7.89021
Atoh8	atonal homolog 8 (Drosophila) [Source:MGI Symbol;Acc:MGI:1918343]	7.76791
Ifi27l1	interferon, alpha-inducible protein 27 like 1 [Source:MGI Symbol;Acc:MGI:1277180]	7.73897
Creb3l3	cAMP responsive element binding protein 3-like 3 [Source:MGI Symbol;Acc:MGI:2384786]	7.71188
Cyp21a1	cytochrome P450, family 21, subfamily a, polypeptide 1 [Source:MGI Symbol;Acc:MGI:88591]	7.62728
Aldh3b2	aldehyde dehydrogenase 3 family, member B2 [Source:MGI Symbol;Acc:MGI:2147613]	7.5953
Prr5l	proline rich 5 like [Source:MGI Symbol;Acc:MGI:1919696]	7.5669
3830417A13Rik	RIKEN cDNA 3830417A13 gene [Source:MGI Symbol;Acc:MGI:1917946]	7.53299
Atp6v0e2	ATPase, H+ transporting, lysosomal V0 subunit E2 [Source:MGI Symbol;Acc:MGI:1923502]	7.52188
Krt7	keratin 7 [Source:MGI Symbol;Acc:MGI:96704]	7.51647
Hsd3b6	hydroxy-delta-5-steroid dehydrogenase, 3 beta- and steroid delta-isomerase 6 [Source:MGI Symbol;Acc:MGI:109598]	7.38169
Zdhhc14	zinc finger, DHHC domain containing 14 [Source:MGI Symbol;Acc:MGI:2653229]	7.21723
Dgki	diacylglycerol kinase, iota [Source:MGI Symbol;Acc:MGI:2443430]	7.20891
Zfp182	zinc finger protein 182 [Source:MGI Symbol;Acc:MGI:2442220]	7.16284
Axl	AXL receptor tyrosine kinase [Source:MGI Symbol;Acc:MGI:1347244]	7.16248
Slc2a5	solute carrier family 2 (facilitated glucose transporter), member 5 [Source:MGI Symbol;Acc:MGI:1928369]	7.13866
Ppp1r14d	protein phosphatase 1, regulatory (inhibitor) subunit 14D [Source:MGI Symbol;Acc:MGI:1919362]	7.12092
Slco4a1	solute carrier organic anion transporter family, member 4a1 [Source:MGI Symbol;Acc:MGI:1351866]	7.09433
Dpf3	D4, zinc and double PHD fingers, family 3 [Source:MGI Symbol;Acc:MGI:1917377]	6.94521
Lpar5	lysophosphatidic acid receptor 5 [Source:MGI Symbol;Acc:MGI:2685918]	6.89779
Cdh5	cadherin 5 [Source:MGI Symbol;Acc:MGI:105057]	6.87548
B3gnt5	UDP-GlcNAc:betaGal beta-1,3-N-acetylglucosaminyltransferase 5 [Source:MGI Symbol;Acc:MGI:2137302]	6.81109
Gzmm	granzyme M (lymphocyte met-ase 1) [Source:MGI Symbol;Acc:MGI:99549]	6.76878
4930506M07Rik	RIKEN cDNA 4930506M07 gene [Source:MGI Symbol;Acc:MGI:1918903]	6.75188
Sntb1	syntrophin, basic 1 [Source:MGI Symbol;Acc:MGI:101781]	6.74804
Obscn	obscurin, cytoskeletal calmodulin and titin-interacting RhoGEF [Source:MGI Symbol;Acc:MGI:2681862]	6.71639
Lin28b	lin-28 homolog B (C. elegans) [Source:MGI Symbol;Acc:MGI:3584032]	6.69092
Add2	adducin 2 (beta) [Source:MGI Symbol;Acc:MGI:87919]	6.64224
Epas1	endothelial PAS domain protein 1 [Source:MGI Symbol;Acc:MGI:109169]	6.62691
Reep1	receptor accessory protein 1 [Source:MGI Symbol;Acc:MGI:1098827]	6.56813
Ak7	adenylate kinase 7 [Source:MGI Symbol;Acc:MGI:1926051]	6.5391
Lancl3	LanC lantibiotic synthetase component C-like 3 (bacterial) [Source:MGI Symbol;Acc:MGI:2443335]	6.49059
Myl4	myosin, light polypeptide 4 [Source:MGI Symbol;Acc:MGI:97267]	6.41878
Isg20	interferon-stimulated protein [Source:MGI Symbol;Acc:MGI:1928895]	6.39502
Sync	syncoilin [Source:MGI Symbol;Acc:MGI:1916078]	6.39287
Bmp6	bone morphogenetic protein 6 [Source:MGI Symbol;Acc:MGI:88182]	6.38026
Adra2b	adrenergic receptor, alpha 2b [Source:MGI Symbol;Acc:MGI:87935]	6.3411
Cacna1g	calcium channel, voltage-dependent, T type, alpha 1G subunit [Source:MGI Symbol;Acc:MGI:1201678]	6.33119
Itga8	integrin alpha 8 [Source:MGI Symbol;Acc:MGI:109442]	6.26454
Prkch	protein kinase C, eta [Source:MGI Symbol;Acc:MGI:97600]	6.25929
Efhb	EF hand domain family, member B [Source:MGI Symbol;Acc:MGI:3045296]	6.24132
Smarca2	SWI/SNF related, matrix associated, actin dependent regulator of chromatin, subfamily a, member 2 [Source:MGI Symbol;Acc:MGI:99603]	6.17831
Mlkl	mixed lineage kinase domain-like [Source:MGI Symbol;Acc:MGI:1921818]	6.11616
Xlr3a	X-linked lymphocyte-regulated 3A [Source:MGI Symbol;Acc:MGI:109506]	6.03136
Xist	X (inactive)-specific transcript, antisense [Source:MGI Symbol;Acc:MGI:1336196]	6.03031
Shank2	SH3/ankyrin domain gene 2 [Source:MGI Symbol;Acc:MGI:2671987]	6.02186
Agap2	ArfGAP with GTPase domain, ankyrin repeat and PH domain 2 [Source:MGI Symbol;Acc:MGI:3580016]	6.00019
Ascl2	achaete-scute complex homolog 2 (Drosophila) [Source:MGI Symbol;Acc:MGI:96920]	5.99991
Olr1	oxidized low density lipoprotein (lectin-like) receptor 1 [Source:MGI Symbol;Acc:MGI:1261434]	5.96823
Scn5a	sodium channel, voltage-gated, type V, alpha [Source:MGI Symbol;Acc:MGI:98251]	5.96126
Lgals3	lectin, galactose binding, soluble 3 [Source:MGI Symbol;Acc:MGI:96778]	5.89134
Vnn1	vanin 1 [Source:MGI Symbol;Acc:MGI:108395]	5.78522
Ptger4	tetratricopeptide repeat domain 33 [Source:MGI Symbol;Acc:MGI:1914765]	5.77798
Klk8	kallikrein related-peptidase 8 [Source:MGI Symbol;Acc:MGI:1343327]	5.75088
Tlr5	toll-like receptor 5 [Source:MGI Symbol;Acc:MGI:1858171]	5.71102
Gabrb3	gamma-aminobutyric acid (GABA) A receptor, subunit beta 3 [Source:MGI Symbol;Acc:MGI:95621]	5.63012
Chrna4	cholinergic receptor, nicotinic, alpha polypeptide 4 [Source:MGI Symbol;Acc:MGI:87888]	5.62325
Celsr3	cadherin, EGF LAG seven-pass G-type receptor 3 (flamingo homolog, Drosophila) [Source:MGI Symbol;Acc:MGI:1858236]	5.62147
Abca1	ATP-binding cassette, sub-family A (ABC1), member 1 [Source:MGI Symbol;Acc:MGI:99607]	5.584
Fam18a	nucleotide binding protein 1 [Source:MGI Symbol;Acc:MGI:1347073]	5.55034
Tmem52	transmembrane protein 52 [Source:MGI Symbol;Acc:MGI:1916921]	5.53977
Epn3	epsin 3 [Source:MGI Symbol;Acc:MGI:1919139]	5.52871
Gm648	predicted gene 648 [Source:MGI Symbol;Acc:MGI:2685494]	5.51513
Twist2	twist homolog 2 (Drosophila) [Source:MGI Symbol;Acc:MGI:104685]	5.49439
Hsd17b2	hydroxysteroid (17-beta) dehydrogenase 2 [Source:MGI Symbol;Acc:MGI:1096386]	5.49363
Tacstd2	tumor-associated calcium signal transducer 2 [Source:MGI Symbol;Acc:MGI:1861606]	5.47538
Wscd2	WSC domain containing 2 [Source:MGI Symbol;Acc:MGI:2445030]	5.46044
Cldn7	claudin 7 [Source:MGI Symbol;Acc:MGI:1859285]	5.42019
Psmb9	proteasome (prosome, macropain) subunit, beta type 9 (large multifunctional peptidase 2) [Source:MGI Symbol;Acc:MGI:1346526]	5.41223
Psmb8	proteasome (prosome, macropain) subunit, beta type 8 (large multifunctional peptidase 7) [Source:MGI Symbol;Acc:MGI:1346527]	5.4057
1200009I06Rik	RIKEN cDNA 1200009I06 gene [Source:MGI Symbol;Acc:MGI:1921363]	5.38869
L1cam	L1 cell adhesion molecule [Source:MGI Symbol;Acc:MGI:96721]	5.37147
Krt8	keratin 8 [Source:MGI Symbol;Acc:MGI:96705]	5.33849
Erg	avian erythroblastosis virus E-26 (v-ets) oncogene related [Source:MGI Symbol;Acc:MGI:95415]	5.3341
Kcnq2	potassium voltage-gated channel, subfamily Q, member 2 [Source:MGI Symbol;Acc:MGI:1309503]	5.29581
Slc24a3	solute carrier family 24 (sodium/potassium/calcium exchanger), member 3 [Source:MGI Symbol;Acc:MGI:2137513]	5.26537
Ccdc65	coiled-coil domain containing 65 [Source:MGI Symbol;Acc:MGI:2146001]	5.26349
Srgap3	SLIT-ROBO Rho GTPase activating protein 3 [Source:MGI Symbol;Acc:MGI:2152938]	5.25852
Ttll7	tubulin tyrosine ligase-like family, member 7 [Source:MGI Symbol;Acc:MGI:1918142]	5.25089
Osmr	oncostatin M receptor [Source:MGI Symbol;Acc:MGI:1330819]	5.24646
Zfp641	zinc finger protein 641 [Source:MGI Symbol;Acc:MGI:2442788]	5.24135
Mbnl3	muscleblind-like 3 (Drosophila) [Source:MGI Symbol;Acc:MGI:2444912]	5.23353
AA986860	expressed sequence AA986860 [Source:MGI Symbol;Acc:MGI:2138143]	5.23189
Pdzd4	PDZ domain containing 4 [Source:MGI Symbol;Acc:MGI:2443483]	5.21946
H2-T23	RIKEN cDNA A930015D03 gene [Source:MGI Symbol;Acc:MGI:1925060]	5.18273
Gamt	guanidinoacetate methyltransferase [Source:MGI Symbol;Acc:MGI:1098221]	5.13247
Cryab	crystallin, alpha B [Source:MGI Symbol;Acc:MGI:88516]	5.12266
Rnf43	ring finger protein 43 [Source:MGI Symbol;Acc:MGI:2442609]	5.11755
Scrn1	secernin 1 [Source:MGI Symbol;Acc:MGI:1917188]	5.10993
Foxj1	forkhead box J1 [Source:MGI Symbol;Acc:MGI:1347474]	5.10963
Klf8	Kruppel-like factor 8 [Source:MGI Symbol;Acc:MGI:2442430]	5.0982
Mrc1	mannose receptor, C type 1 [Source:MGI Symbol;Acc:MGI:97142]	5.09539
S1pr1	sphingosine-1-phosphate receptor 1 [Source:MGI Symbol;Acc:MGI:1096355]	5.09352
Sct	secretin [Source:MGI Symbol;Acc:MGI:99466]	5.08405
Evpl	envoplakin [Source:MGI Symbol;Acc:MGI:107507]	5.07285
Tnc	tenascin C [Source:MGI Symbol;Acc:MGI:101922]	5.06211
Evc2	Ellis van Creveld syndrome 2 homolog (human) [Source:MGI Symbol;Acc:MGI:1915775]	5.04387
Thbs1	thrombospondin 1 [Source:MGI Symbol;Acc:MGI:98737]	5.03803
Pramef12	PRAME family member 12 [Source:MGI Symbol;Acc:MGI:1924882]	5.0286
Reps2	RALBP1 associated Eps domain containing protein 2 [Source:MGI Symbol;Acc:MGI:2663511]	5.02666
Psg19	pregnancy specific glycoprotein 19 [Source:MGI Symbol;Acc:MGI:1347252]	5.02277
Slc25a21	paired box gene 9 [Source:MGI Symbol;Acc:MGI:97493]	5.01494
Prss12	protease, serine, 12 neurotrypsin (motopsin) [Source:MGI Symbol;Acc:MGI:1100881]	5.00394
Hspa1a	heat shock protein 1A [Source:MGI Symbol;Acc:MGI:96244]	4.99016
Antxr1	anthrax toxin receptor 1 [Source:MGI Symbol;Acc:MGI:1916788]	4.97385
Nefh	neurofilament, heavy polypeptide [Source:MGI Symbol;Acc:MGI:97309]	4.96402
Tmem140	transmembrane protein 140 [Source:MGI Symbol;Acc:MGI:1915737]	4.95371
Nt5e	5' nucleotidase, ecto [Source:MGI Symbol;Acc:MGI:99782]	4.93546
Col25a1	collagen, type XXV, alpha 1 [Source:MGI Symbol;Acc:MGI:1924268]	4.92636
Dact1	dapper homolog 1, antagonist of beta-catenin (xenopus) [Source:MGI Symbol;Acc:MGI:1891740]	4.90004
2810021J22Rik	RIKEN cDNA 2810021J22 gene [Source:MGI Symbol;Acc:MGI:1917194]	4.89387
Odz3	odd Oz/ten-m homolog 3 (Drosophila) [Source:MGI Symbol;Acc:MGI:1345183]	4.88155
Prlr	prolactin receptor [Source:MGI Symbol;Acc:MGI:97763]	4.88079
Hic1	hypermethylated in cancer 1 [Source:MGI Symbol;Acc:MGI:1338010]	4.88044
Ggt1	gamma-glutamyltransferase 1 [Source:MGI Symbol;Acc:MGI:95706]	4.8718
Fam188b	family with sequence similarity 188, member B [Source:MGI Symbol;Acc:MGI:3583959]	4.86603
2310028H24Rik	RIKEN cDNA 1700066J24 gene [Source:MGI Symbol;Acc:MGI:1924242]	4.85265
Ap1m2	adaptor protein complex AP-1, mu 2 subunit [Source:MGI Symbol;Acc:MGI:1336974]	4.84655
Cd200	CD200 antigen [Source:MGI Symbol;Acc:MGI:1196990]	4.84177
Gal3st3	galactose-3-O-sulfotransferase 3 [Source:MGI Symbol;Acc:MGI:3617843]	4.83007
Gbp7	guanylate binding protein 7 [Source:MGI Symbol;Acc:MGI:2444421]	4.81545
Acan	aggrecan [Source:MGI Symbol;Acc:MGI:99602]	4.81029
Cmtm5	CKLF-like MARVEL transmembrane domain containing 5 [Source:MGI Symbol;Acc:MGI:2447164]	4.80428
Lifr	leukemia inhibitory factor receptor [Source:MGI Symbol;Acc:MGI:96788]	4.80297
Art4	ADP-ribosyltransferase 4 [Source:MGI Symbol;Acc:MGI:1202710]	4.79849
Htr1d	5-hydroxytryptamine (serotonin) receptor 1D [Source:MGI Symbol;Acc:MGI:96276]	4.79587
C230030N03Rik	RIKEN cDNA C230030N03 gene [Source:MGI Symbol;Acc:MGI:3045297]	4.79012
Scube3	signal peptide, CUB domain, EGF-like 3 [Source:MGI Symbol;Acc:MGI:3045253]	4.78029
Hoxb13	homeobox B13 [Source:MGI Symbol;Acc:MGI:107730]	4.76803
H2-K1	histocompatibility 2, K1, K region [Source:MGI Symbol;Acc:MGI:95904]	4.74593
Tnfsf11	tumor necrosis factor (ligand) superfamily, member 11 [Source:MGI Symbol;Acc:MGI:1100089]	4.73801
Dock3	RIKEN cDNA 4930524O07 gene [Source:MGI Symbol;Acc:MGI:1915514]	4.7338
Ryr2	ryanodine receptor 2, cardiac [Source:MGI Symbol;Acc:MGI:99685]	4.72547
Slitrk4	SLIT and NTRK-like family, member 4 [Source:MGI Symbol;Acc:MGI:2442509]	4.71007
Vax2	Vax2 opposite strand transcript 2 [Source:MGI Symbol;Acc:MGI:3583303]	4.70774
Rap1gap	Rap1 GTPase-activating protein [Source:MGI Symbol;Acc:MGI:109338]	4.69429
Gdpd3	glycerophosphodiester phosphodiesterase domain containing 3 [Source:MGI Symbol;Acc:MGI:1915866]	4.6918
Cyp2s1	cytochrome P450, family 2, subfamily s, polypeptide 1 [Source:MGI Symbol;Acc:MGI:1921384]	4.68829
Liph	lipase, member H [Source:MGI Symbol;Acc:MGI:2388029]	4.68303
Caskin1	CASK interacting protein 1 [Source:MGI Symbol;Acc:MGI:2442952]	4.66898
Zfp36l3	zinc finger protein 36, C3H type-like 3 [Source:MGI Symbol;Acc:MGI:3525151]	4.66605
Met	met proto-oncogene [Source:MGI Symbol;Acc:MGI:96969]	4.66141
Amigo3	ring finger protein 123 [Source:MGI Symbol;Acc:MGI:2148796]	4.62921
Trpv2	transient receptor potential cation channel, subfamily V, member 2 [Source:MGI Symbol;Acc:MGI:1341836]	4.6243
Sema5a	sema domain, seven thrombospondin repeats (type 1 and type 1-like), transmembrane domain (TM) and short cytoplasmic domain, (semaphorin) 5A [Source:MGI Symbol;Acc:MGI:107556]	4.62186
Sfrp1	secreted frizzled-related protein 1 [Source:MGI Symbol;Acc:MGI:892014]	4.61109
Gab2	growth factor receptor bound protein 2-associated protein 2 [Source:MGI Symbol;Acc:MGI:1333854]	4.60005
Hspa1b	heat shock protein 1B [Source:MGI Symbol;Acc:MGI:99517]	4.59053
Slc3a1	solute carrier family 3, member 1 [Source:MGI Symbol;Acc:MGI:1195264]	4.58412
Hpse	heparanase [Source:MGI Symbol;Acc:MGI:1343124]	4.56403
Surf2	surfeit gene 1 [Source:MGI Symbol;Acc:MGI:98443]	4.55962
Trp53i11	transformation related protein 53 inducible protein 11 [Source:MGI Symbol;Acc:MGI:2670995]	4.55842
Fam131b	chloride channel 1 [Source:MGI Symbol;Acc:MGI:88417]	4.53636
Dlgap3	discs, large (Drosophila) homolog-associated protein 3 [Source:MGI Symbol;Acc:MGI:3039563]	4.50588
Klf4	Kruppel-like factor 4 (gut) [Source:MGI Symbol;Acc:MGI:1342287]	4.49753
Elf3	E74-like factor 3 [Source:MGI Symbol;Acc:MGI:1101781]	4.48877
Zfp9	zinc finger protein 9 [Source:MGI Symbol;Acc:MGI:99210]	4.4841
Gm13205	castor homolog 1, zinc finger (Drosophila) [Source:MGI Symbol;Acc:MGI:1196251]	4.4634
Rtn1	reticulon 1 [Source:MGI Symbol;Acc:MGI:1933947]	4.46273
Ophn1	oligophrenin 1 [Source:MGI Symbol;Acc:MGI:2151070]	4.46271
Diras1	DIRAS family, GTP-binding RAS-like 1 [Source:MGI Symbol;Acc:MGI:2183442]	4.45405
Celf2	CUGBP, Elav-like family member 2 [Source:MGI Symbol;Acc:MGI:1338822]	4.44538
Apc2	adenomatosis polyposis coli 2 [Source:MGI Symbol;Acc:MGI:1346052]	4.44323
Shroom1	shroom family member 1 [Source:MGI Symbol;Acc:MGI:1919024]	4.42258
Notum	predicted gene 11768 [Source:MGI Symbol;Acc:MGI:3650756]	4.41605
Il1r2	interleukin 1 receptor, type II [Source:MGI Symbol;Acc:MGI:96546]	4.40338
1600025M17Rik	RIKEN cDNA 1600025M17 gene [Source:MGI Symbol;Acc:MGI:1919280]	4.39908
Hs3st1	heparan sulfate (glucosamine) 3-O-sulfotransferase 1 [Source:MGI Symbol;Acc:MGI:1201606]	4.37907
Bend7	BEN domain containing 7 [Source:MGI Symbol;Acc:MGI:2443100]	4.37269
Unc13d	unc-13 homolog D (C. elegans) [Source:MGI Symbol;Acc:MGI:1917700]	4.35793
Plekhg1	pleckstrin homology domain containing, family G (with RhoGef domain) member 1 [Source:MGI Symbol;Acc:MGI:2676551]	4.35474
Vat1l	vesicle amine transport protein 1 homolog-like (T. californica) [Source:MGI Symbol;Acc:MGI:2142534]	4.31905
Parp14	poly (ADP-ribose) polymerase family, member 14 [Source:MGI Symbol;Acc:MGI:1919489]	4.31491
Myo15	myosin XV [Source:MGI Symbol;Acc:MGI:1261811]	4.29902
Rell2	RELT-like 2 [Source:MGI Symbol;Acc:MGI:1918044]	4.29207
Gpr155	G protein-coupled receptor 155 [Source:MGI Symbol;Acc:MGI:1915776]	4.25156
Myh14	myosin, heavy polypeptide 14 [Source:MGI Symbol;Acc:MGI:1919210]	4.23062
Rragd	Ras-related GTP binding D [Source:MGI Symbol;Acc:MGI:1098604]	4.22837
Pdgfra	platelet derived growth factor receptor, alpha polypeptide [Source:MGI Symbol;Acc:MGI:97530]	4.22456
Kif9	kinesin family member 9 [Source:MGI Symbol;Acc:MGI:1098237]	4.22337
Cdh23	cadherin 23 (otocadherin) [Source:MGI Symbol;Acc:MGI:1890219]	4.22249
Sh3tc2	SH3 domain and tetratricopeptide repeats 2 [Source:MGI Symbol;Acc:MGI:2444417]	4.21557
Cited4	Cbp/p300-interacting transactivator, with Glu/Asp-rich carboxy-terminal domain, 4 [Source:MGI Symbol;Acc:MGI:1861694]	4.21182
Epha4	Eph receptor A4 [Source:MGI Symbol;Acc:MGI:98277]	4.20815
Col22a1	collagen, type XXII, alpha 1 [Source:MGI Symbol;Acc:MGI:1916950]	4.20482
Zc3h12c	zinc finger CCCH type containing 12C [Source:MGI Symbol;Acc:MGI:3026959]	4.18615
Kitl	kit ligand [Source:MGI Symbol;Acc:MGI:96974]	4.17568
Fmn1	formin 1 [Source:MGI Symbol;Acc:MGI:101815]	4.14494
Nxf7	nuclear RNA export factor 7 [Source:MGI Symbol;Acc:MGI:2159343]	4.14032
H2-D1	histocompatibility 2, D region locus 1 [Source:MGI Symbol;Acc:MGI:95896]	4.13933
Tspan12	tetraspanin 12 [Source:MGI Symbol;Acc:MGI:1889818]	4.12419
Fhl1	four and a half LIM domains 1 [Source:MGI Symbol;Acc:MGI:1298387]	4.12329
Glis1	No description	4.09713
Fmn2	formin 2 [Source:MGI Symbol;Acc:MGI:1859252]	4.0884
Gbgt1	globoside alpha-1,3-N-acetylgalactosaminyltransferase 1 [Source:MGI Symbol;Acc:MGI:2449143]	4.08408
Tmem102	transmembrane protein 102 [Source:MGI Symbol;Acc:MGI:1921591]	4.08208
Clstn3	calsyntenin 3 [Source:MGI Symbol;Acc:MGI:2178323]	4.07939
Slc24a1	solute carrier family 24 (sodium/potassium/calcium exchanger), member 1 [Source:MGI Symbol;Acc:MGI:2384871]	4.07549
Ttc12	tetratricopeptide repeat domain 12 [Source:MGI Symbol;Acc:MGI:2444588]	4.07517
Slc39a8	solute carrier family 39 (metal ion transporter), member 8 [Source:MGI Symbol;Acc:MGI:1914797]	4.06081
Prdm1	PR domain containing 1, with ZNF domain [Source:MGI Symbol;Acc:MGI:99655]	4.05858
Atp6v0a4	ATPase, H+ transporting, lysosomal V0 subunit A4 [Source:MGI Symbol;Acc:MGI:2153480]	4.04595
Pip5k1b	phosphatidylinositol-4-phosphate 5-kinase, type 1 beta [Source:MGI Symbol;Acc:MGI:107930]	4.04094
Rab43	RAB43, member RAS oncogene family [Source:MGI Symbol;Acc:MGI:1917084]	4.0272
Prss8	K(lysine) acetyltransferase 8 [Source:MGI Symbol;Acc:MGI:1915023]	4.00839
Parm1	prostate androgen-regulated mucin-like protein 1 [Source:MGI Symbol;Acc:MGI:2443349]	3.99181
Il15ra	interleukin 15 receptor, alpha chain [Source:MGI Symbol;Acc:MGI:104644]	3.99123
Peli2	pellino 2 [Source:MGI Symbol;Acc:MGI:1891445]	3.99107
1700019D03Rik	RIKEN cDNA 1700019D03 gene [Source:MGI Symbol;Acc:MGI:1914330]	3.97215
Tpbg	RIKEN cDNA 9330154J02 gene [Source:MGI Symbol;Acc:MGI:3045244]	3.95322
Zfp458	zinc finger protein 458 [Source:MGI Symbol;Acc:MGI:3040691]	3.94421
Timp3	synapsin III [Source:MGI Symbol;Acc:MGI:1351334]	3.94205
Ccdc158	coiled-coil domain containing 158 [Source:MGI Symbol;Acc:MGI:2444555]	3.94045
Pgf	placental growth factor [Source:MGI Symbol;Acc:MGI:105095]	3.93937
Acp5	acid phosphatase 5, tartrate resistant [Source:MGI Symbol;Acc:MGI:87883]	3.93415
D630003M21Rik	RIKEN cDNA D630003M21 gene [Source:MGI Symbol;Acc:MGI:3606579]	3.9263
Mcc	mutated in colorectal cancers [Source:MGI Symbol;Acc:MGI:96930]	3.9209
Cgn	cingulin [Source:MGI Symbol;Acc:MGI:1927237]	3.91154
2610019F03Rik	RIKEN cDNA 2610019F03 gene [Source:MGI Symbol;Acc:MGI:1919398]	3.90906
Arhgap20	Rho GTPase activating protein 20 [Source:MGI Symbol;Acc:MGI:2445175]	3.90839
Lingo1	leucine rich repeat and Ig domain containing 1 [Source:MGI Symbol;Acc:MGI:1915522]	3.88983
Tns4	tensin 4 [Source:MGI Symbol;Acc:MGI:2144377]	3.8825
Hectd2	HECT domain containing 2 [Source:MGI Symbol;Acc:MGI:2442663]	3.87104
Hivep2	human immunodeficiency virus type I enhancer binding protein 2 [Source:MGI Symbol;Acc:MGI:1338076]	3.84773
Rnd2	vesicle amine transport protein 1 homolog (T californica) [Source:MGI Symbol;Acc:MGI:1349450]	3.82651
Tfr2	transferrin receptor 2 [Source:MGI Symbol;Acc:MGI:1354956]	3.8195
Vdr	vitamin D receptor [Source:MGI Symbol;Acc:MGI:103076]	3.80979
Il17rc	interleukin 17 receptor C [Source:MGI Symbol;Acc:MGI:2159336]	3.80155
Acsbg1	acyl-CoA synthetase bubblegum family member 1 [Source:MGI Symbol;Acc:MGI:2385656]	3.80153
Faim2	Fas apoptotic inhibitory molecule 2 [Source:MGI Symbol;Acc:MGI:1919643]	3.79431
Ror1	receptor tyrosine kinase-like orphan receptor 1 [Source:MGI Symbol;Acc:MGI:1347520]	3.79409
Cntn2	contactin 2 [Source:MGI Symbol;Acc:MGI:104518]	3.79375
C630004H02Rik	RIKEN cDNA C630004H02 gene [Source:MGI Symbol;Acc:MGI:2445087]	3.78756
Tapbp	TAP binding protein [Source:MGI Symbol;Acc:MGI:1201689]	3.78484
Megf6	multiple EGF-like-domains 6 [Source:MGI Symbol;Acc:MGI:1919351]	3.78372
Wdr72	WD repeat domain 72 [Source:MGI Symbol;Acc:MGI:3583957]	3.76433
Mertk	c-mer proto-oncogene tyrosine kinase [Source:MGI Symbol;Acc:MGI:96965]	3.75571
Fam83b	family with sequence similarity 83, member B [Source:MGI Symbol;Acc:MGI:2685362]	3.72939
Mgll	monoglyceride lipase [Source:MGI Symbol;Acc:MGI:1346042]	3.7253
Xlr5a	X-linked lymphocyte-regulated 5A [Source:MGI Symbol;Acc:MGI:3574108]	3.70709
Serpini1	serine (or cysteine) peptidase inhibitor, clade I, member 1 [Source:MGI Symbol;Acc:MGI:1194506]	3.68522
Jun	Jun oncogene [Source:MGI Symbol;Acc:MGI:96646]	3.67005
Ccdc40	coiled-coil domain containing 40 [Source:MGI Symbol;Acc:MGI:2443893]	3.66289
Klhl13	kelch-like 13 (Drosophila) [Source:MGI Symbol;Acc:MGI:1914705]	3.66142
Mfap3l	microfibrillar-associated protein 3-like [Source:MGI Symbol;Acc:MGI:1918556]	3.65861
Gata2	GATA binding protein 2 [Source:MGI Symbol;Acc:MGI:95662]	3.65463
Syt8	synaptotagmin VIII [Source:MGI Symbol;Acc:MGI:1859867]	3.65395
Adcy1	adenylate cyclase 1 [Source:MGI Symbol;Acc:MGI:99677]	3.63959
H2-DMa	histocompatibility 2, class II, locus DMa [Source:MGI Symbol;Acc:MGI:95921]	3.63866
Lypd3	Ly6/Plaur domain containing 3 [Source:MGI Symbol;Acc:MGI:1919684]	3.63313
Itgb4	integrin beta 4 [Source:MGI Symbol;Acc:MGI:96613]	3.61207
Tmem139	transmembrane protein 139 [Source:MGI Symbol;Acc:MGI:1924444]	3.59644
Tlcd2	RIKEN cDNA 2210403K04 gene [Source:MGI Symbol;Acc:MGI:1914348]	3.58544
Arl5c	ADP-ribosylation factor-like 5C [Source:MGI Symbol;Acc:MGI:3028577]	3.57634
Prom2	prominin 2 [Source:MGI Symbol;Acc:MGI:2138997]	3.54465
Gatm	glycine amidinotransferase (L-arginine:glycine amidinotransferase) [Source:MGI Symbol;Acc:MGI:1914342]	3.53948
Wnt7a	wingless-related MMTV integration site 7A [Source:MGI Symbol;Acc:MGI:98961]	3.53587
Cyp4f13	cytochrome P450, family 4, subfamily f, polypeptide 13 [Source:MGI Symbol;Acc:MGI:2158641]	3.53443
Lipg	lipase, endothelial [Source:MGI Symbol;Acc:MGI:1341803]	3.5291
Plxnc1	plexin C1 [Source:MGI Symbol;Acc:MGI:1890127]	3.52347
Ngef	neuronal guanine nucleotide exchange factor [Source:MGI Symbol;Acc:MGI:1858414]	3.52167
Slc22a7	solute carrier family 22 (organic anion transporter), member 7 [Source:MGI Symbol;Acc:MGI:1859559]	3.51111
Hpn	hepsin [Source:MGI Symbol;Acc:MGI:1196620]	3.50624
Bicc1	RIKEN cDNA 4930533K18 gene [Source:MGI Symbol;Acc:MGI:1922439]	3.50543
Ank3	ankyrin 3, epithelial [Source:MGI Symbol;Acc:MGI:88026]	3.50286
Baz1a	bromodomain adjacent to zinc finger domain 1A [Source:MGI Symbol;Acc:MGI:1309478]	3.48812
C2cd4c	C2 calcium-dependent domain containing 4C [Source:MGI Symbol;Acc:MGI:2685084]	3.47403
Sema4f	sema domain, immunoglobulin domain (Ig), TM domain, and short cytoplasmic domain [Source:MGI Symbol;Acc:MGI:1340055]	3.4706
Psd4	pleckstrin and Sec7 domain containing 4 [Source:MGI Symbol;Acc:MGI:2674093]	3.46981
Tspan33	tetraspanin 33 [Source:MGI Symbol;Acc:MGI:1919012]	3.46419
Dqx1	DEAQ RNA-dependent ATPase [Source:MGI Symbol;Acc:MGI:2136388]	3.45675
Ptges	prostaglandin E synthase [Source:MGI Symbol;Acc:MGI:1927593]	3.4542
Pde10a	phosphodiesterase 10A [Source:MGI Symbol;Acc:MGI:1345143]	3.44239
Sfn	stratifin [Source:MGI Symbol;Acc:MGI:1891831]	3.44064
Gna15	guanine nucleotide binding protein, alpha 15 [Source:MGI Symbol;Acc:MGI:95770]	3.43338
Tnk1	phospholipid scramblase 3 [Source:MGI Symbol;Acc:MGI:1917560]	3.4166
Mtus1	mitochondrial tumor suppressor 1 [Source:MGI Symbol;Acc:MGI:2142572]	3.41449
Rasef	RAS and EF hand domain containing [Source:MGI Symbol;Acc:MGI:2448565]	3.40518
Gm221	predicted gene 221 [Source:MGI Symbol;Acc:MGI:2685067]	3.40354
Pdzrn3	PDZ domain containing RING finger 3 [Source:MGI Symbol;Acc:MGI:1933157]	3.40238
Mmp24	matrix metallopeptidase 24 [Source:MGI Symbol;Acc:MGI:1341867]	3.3932
Slc2a6	solute carrier family 2 (facilitated glucose transporter), member 6 [Source:MGI Symbol;Acc:MGI:2443286]	3.38725
Fam46a	family with sequence similarity 46, member A [Source:MGI Symbol;Acc:MGI:2670964]	3.38613
Fam43b	family with sequence similarity 43, member B [Source:MGI Symbol;Acc:MGI:3651622]	3.38071
Mycbpap	MYCBP associated protein [Source:MGI Symbol;Acc:MGI:2388726]	3.38071
Phf15	PHD finger protein 15 [Source:MGI Symbol;Acc:MGI:1924151]	3.38048
Endou	endonuclease, polyU-specific [Source:MGI Symbol;Acc:MGI:97746]	3.37858
Nkx2-9	NK2 transcription factor related, locus 9 (Drosophila) [Source:MGI Symbol;Acc:MGI:1270158]	3.37146
Hdac11	histone deacetylase 11 [Source:MGI Symbol;Acc:MGI:2385252]	3.35594
Abca3	ATP-binding cassette, sub-family A (ABC1), member 3 [Source:MGI Symbol;Acc:MGI:1351617]	3.35231
Catsperg1	cation channel, sperm-associated, gamma 1 [Source:MGI Symbol;Acc:MGI:2443617]	3.35165
App	amyloid beta (A4) precursor protein [Source:MGI Symbol;Acc:MGI:88059]	3.32594
Fam190a	family with sequence similarity 190, member A [Source:MGI Symbol;Acc:MGI:3045354]	3.32411
Igf2bp3	RIKEN cDNA 2410003K15 gene [Source:MGI Symbol;Acc:MGI:1922843]	3.32074
Sema5b	sema domain, seven thrombospondin repeats (type 1 and type 1-like), transmembrane domain (TM) and short cytoplasmic domain, (semaphorin) 5B [Source:MGI Symbol;Acc:MGI:107555]	3.31236
Clgn	calmegin [Source:MGI Symbol;Acc:MGI:107472]	3.30957
CR555305.1	No description	3.30306
Adamts8	a disintegrin-like and metallopeptidase (reprolysin type) with thrombospondin type 1 motif, 8 [Source:MGI Symbol;Acc:MGI:1353468]	3.29795
Adcyap1r1	adenylate cyclase activating polypeptide 1 receptor 1 [Source:MGI Symbol;Acc:MGI:108449]	3.29421
A4galt	alpha 1,4-galactosyltransferase [Source:MGI Symbol;Acc:MGI:3512453]	3.28538
Gpx8	cell division cycle 20 homolog B (S. cerevisiae) [Source:MGI Symbol;Acc:MGI:3644472]	3.2737
Cabp7	zinc finger, matrin type 5 [Source:MGI Symbol;Acc:MGI:1914428]	3.27342
Cd82	CD82 antigen [Source:MGI Symbol;Acc:MGI:104651]	3.27174
Kcns3	potassium voltage-gated channel, delayed-rectifier, subfamily S, member 3 [Source:MGI Symbol;Acc:MGI:1098804]	3.2695
Tanc2	tetratricopeptide repeat, ankyrin repeat and coiled-coil containing 2 [Source:MGI Symbol;Acc:MGI:2444121]	3.26693
Sema6d	sema domain, transmembrane domain (TM), and cytoplasmic domain, (semaphorin) 6D [Source:MGI Symbol;Acc:MGI:2387661]	3.25989
Ttbk1	tau tubulin kinase 1 [Source:MGI Symbol;Acc:MGI:2147036]	3.25743
Slc1a6	solute carrier family 1 (high affinity aspartate/glutamate transporter), member 6 [Source:MGI Symbol;Acc:MGI:1096331]	3.25742
Surf1	surfeit gene 1 [Source:MGI Symbol;Acc:MGI:98443]	3.24957
Thnsl2	threonine synthase-like 2 (bacterial) [Source:MGI Symbol;Acc:MGI:3041254]	3.24631
Spnb3	spectrin beta 3 [Source:MGI Symbol;Acc:MGI:1313261]	3.2443
Podn	podocan [Source:MGI Symbol;Acc:MGI:2674939]	3.24386
Mast1	deoxyribonuclease II alpha [Source:MGI Symbol;Acc:MGI:1329019]	3.24359
Phyhipl	family with sequence similarity 13, member C [Source:MGI Symbol;Acc:MGI:1918971]	3.24238
Ablim3	actin binding LIM protein family, member 3 [Source:MGI Symbol;Acc:MGI:2442582]	3.24093
Bap1	Brca1 associated protein 1 [Source:MGI Symbol;Acc:MGI:1206586]	3.23734
4931408A02Rik	RIKEN cDNA 4931408A02 gene [Source:MGI Symbol;Acc:MGI:1918217]	3.23618
1700007K13Rik	RIKEN cDNA 1700007K13 gene [Source:MGI Symbol;Acc:MGI:1916577]	3.23344
Tada1	transcriptional adaptor 1 [Source:MGI Symbol;Acc:MGI:1196415]	3.23199
Gm6907	predicted gene 6907 [Source:MGI Symbol;Acc:MGI:3648476]	3.21467
Rnf152	ring finger protein 152 [Source:MGI Symbol;Acc:MGI:2443787]	3.21327
Krt19	keratin 19 [Source:MGI Symbol;Acc:MGI:96693]	3.20885
Snx22	peptidylprolyl isomerase B [Source:MGI Symbol;Acc:MGI:97750]	3.20774
Tmem62	transmembrane protein 62 [Source:MGI Symbol;Acc:MGI:2139461]	3.20661
Plbd1	phospholipase B domain containing 1 [Source:MGI Symbol;Acc:MGI:1914107]	3.20222
Dab1	disabled homolog 1 (Drosophila) [Source:MGI Symbol;Acc:MGI:108554]	3.19824
Tmem229b	transmembrane protein 229B [Source:MGI Symbol;Acc:MGI:2444389]	3.18865
Dnaic2	dynein, axonemal, intermediate chain 2 [Source:MGI Symbol;Acc:MGI:2685574]	3.18537
Oas1a	2'-5' oligoadenylate synthetase 1A [Source:MGI Symbol;Acc:MGI:2180860]	3.18082
Rgs17	regulator of G-protein signaling 17 [Source:MGI Symbol;Acc:MGI:1927469]	3.17981
Ugt8a	UDP galactosyltransferase 8A [Source:MGI Symbol;Acc:MGI:109522]	3.17804
Sox13	SRY-box containing gene 13 [Source:MGI Symbol;Acc:MGI:98361]	3.17428
Zhx3	phospholipase C, gamma 1 [Source:MGI Symbol;Acc:MGI:97615]	3.17397
Bai1	brain-specific angiogenesis inhibitor 1 [Source:MGI Symbol;Acc:MGI:1933736]	3.17361
Efhd1	EF hand domain containing 1 [Source:MGI Symbol;Acc:MGI:1921607]	3.1714
C1ra	complement component 1, r subcomponent A [Source:MGI Symbol;Acc:MGI:1355313]	3.17115
Nr3c1	nuclear receptor subfamily 3, group C, member 1 [Source:MGI Symbol;Acc:MGI:95824]	3.16788
Mid2	midline 2 [Source:MGI Symbol;Acc:MGI:1344333]	3.16685
Aqp3	aquaporin 3 [Source:MGI Symbol;Acc:MGI:1333777]	3.14774
Oaf	OAF homolog (Drosophila) [Source:MGI Symbol;Acc:MGI:94852]	3.13805
Tbc1d10c	TBC1 domain family, member 10c [Source:MGI Symbol;Acc:MGI:1922072]	3.13282
Ctso	cathepsin O [Source:MGI Symbol;Acc:MGI:2139628]	3.12735
Olfml2b	olfactomedin-like 2B [Source:MGI Symbol;Acc:MGI:2443310]	3.12017
4930473A06Rik	RIKEN cDNA 4930473A06 gene [Source:MGI Symbol;Acc:MGI:1922152]	3.11823
Zfp52	zinc finger protein 52 [Source:MGI Symbol;Acc:MGI:99199]	3.11688
Efnb1	ephrin B1 [Source:MGI Symbol;Acc:MGI:102708]	3.11254
Crip1	cysteine-rich protein 1 (intestinal) [Source:MGI Symbol;Acc:MGI:88501]	3.11193
Fam171a2	granulin [Source:MGI Symbol;Acc:MGI:95832]	3.11004
Ckmt1	creatine kinase, mitochondrial 1, ubiquitous [Source:MGI Symbol;Acc:MGI:99441]	3.10781
Dmd	dystrophin, muscular dystrophy [Source:MGI Symbol;Acc:MGI:94909]	3.10694
Spata2l	predicted gene 20388 [Source:MGI Symbol;Acc:MGI:5141853]	3.0991
Pdk4	pyruvate dehydrogenase kinase, isoenzyme 4 [Source:MGI Symbol;Acc:MGI:1351481]	3.09858
Nefl	neurofilament, medium polypeptide [Source:MGI Symbol;Acc:MGI:97314]	3.09773
Lipa	lysosomal acid lipase A [Source:MGI Symbol;Acc:MGI:96789]	3.09669
Arhgef16	Rho guanine nucleotide exchange factor (GEF) 16 [Source:MGI Symbol;Acc:MGI:2446219]	3.09072
Wfdc2	WAP four-disulfide core domain 2 [Source:MGI Symbol;Acc:MGI:1914951]	3.08732
Id2	inhibitor of DNA binding 2 [Source:MGI Symbol;Acc:MGI:96397]	3.08608
Elf1	WW domain binding protein 4 [Source:MGI Symbol;Acc:MGI:109568]	3.074
Ttc16	tetratricopeptide repeat domain 16 [Source:MGI Symbol;Acc:MGI:2443048]	3.06465
Mgat4a	mannoside acetylglucosaminyltransferase 4, isoenzyme A [Source:MGI Symbol;Acc:MGI:2662992]	3.06368
Icam1	intercellular adhesion molecule 1 [Source:MGI Symbol;Acc:MGI:96392]	3.06192
Galnt6	No description	3.05317
Pcyt1b	phosphate cytidylyltransferase 1, choline, beta isoform [Source:MGI Symbol;Acc:MGI:2147987]	3.04877
Mtap7d2	MAP7 domain containing 2 [Source:MGI Symbol;Acc:MGI:1917474]	3.0437
Col8a2	collagen, type VIII, alpha 2 [Source:MGI Symbol;Acc:MGI:88464]	3.04263
Slain1	SLAIN motif family, member 1 [Source:MGI Symbol;Acc:MGI:2145578]	3.03721
Klhl29	kelch-like 29 (Drosophila) [Source:MGI Symbol;Acc:MGI:2683857]	3.03695
Kcnc4	potassium voltage gated channel, Shaw-related subfamily, member 4 [Source:MGI Symbol;Acc:MGI:96670]	3.03674
Ttc38	tetratricopeptide repeat domain 38 [Source:MGI Symbol;Acc:MGI:2146198]	3.03331
Batf3	basic leucine zipper transcription factor, ATF-like 3 [Source:MGI Symbol;Acc:MGI:1925491]	3.03006
Irgm1	immunity-related GTPase family M member 1 [Source:MGI Symbol;Acc:MGI:107567]	3.02972
Srgn	serglycin [Source:MGI Symbol;Acc:MGI:97756]	3.02875
Dapp1	dual adaptor for phosphotyrosine and 3-phosphoinositides 1 [Source:MGI Symbol;Acc:MGI:1347063]	3.02343
Dpysl5	dihydropyrimidinase-like 5 [Source:MGI Symbol;Acc:MGI:1929772]	3.01887
Pdzk1	CD160 antigen [Source:MGI Symbol;Acc:MGI:1860383]	3.01525
Klf14	Kruppel-like factor 14 [Source:MGI Symbol;Acc:MGI:3577024]	3.01198
Atxn1	ataxin 1 [Source:MGI Symbol;Acc:MGI:104783]	3.00788
E130309D14Rik	RIKEN cDNA E130309D14 gene [Source:MGI Symbol;Acc:MGI:3588240]	2.99633
Star	steroidogenic acute regulatory protein [Source:MGI Symbol;Acc:MGI:102760]	2.99567
Fhod3	formin homology 2 domain containing 3 [Source:MGI Symbol;Acc:MGI:1925847]	2.99467
Dopey2	dopey family member 2 [Source:MGI Symbol;Acc:MGI:1917278]	2.99387
Sox11	SRY-box containing gene 11 [Source:MGI Symbol;Acc:MGI:98359]	2.99092
Zdbf2	No description	2.98986
Col5a1	RIKEN cDNA 2810430I11 gene [Source:MGI Symbol;Acc:MGI:3590515]	2.98984
Prickle2	prickle homolog 2 (Drosophila) [Source:MGI Symbol;Acc:MGI:1925144]	2.98749
Gpr153	G protein-coupled receptor 153 [Source:MGI Symbol;Acc:MGI:1916157]	2.98471
Gtsf1l	gametocyte specific factor 1-like [Source:MGI Symbol;Acc:MGI:1915486]	2.98058
Scube1	signal peptide, CUB domain, EGF-like 1 [Source:MGI Symbol;Acc:MGI:1890616]	2.96658
Abcg1	ATP-binding cassette, sub-family G (WHITE), member 1 [Source:MGI Symbol;Acc:MGI:107704]	2.953
Farp2	FERM, RhoGEF and pleckstrin domain protein 2 [Source:MGI Symbol;Acc:MGI:2385126]	2.94894
Dgkk	diacylglycerol kinase kappa [Source:MGI Symbol;Acc:MGI:3580254]	2.94796
Nagpa	N-acetylglucosamine-1-phosphodiester alpha-N-acetylglucosaminidase [Source:MGI Symbol;Acc:MGI:1351598]	2.94704
Ppp1r16b	protein phosphatase 1, regulatory (inhibitor) subunit 16B [Source:MGI Symbol;Acc:MGI:2151841]	2.94371
Rab3d	RAB3D, member RAS oncogene family [Source:MGI Symbol;Acc:MGI:97844]	2.94276
Dpysl4	dihydropyrimidinase-like 4 [Source:MGI Symbol;Acc:MGI:1349764]	2.93763
Rcsd1	RCSD domain containing 1 [Source:MGI Symbol;Acc:MGI:2676394]	2.93632
BC068157	ecotropic viral integration site 5 like [Source:MGI Symbol;Acc:MGI:2442167]	2.93579
Mllt3	myeloid/lymphoid or mixed-lineage leukemia (trithorax homolog, Drosophila); translocated to, 3 [Source:MGI Symbol;Acc:MGI:1917372]	2.91861
Tgfa	transforming growth factor alpha [Source:MGI Symbol;Acc:MGI:98724]	2.91227
Iqsec1	IQ motif and Sec7 domain 1 [Source:MGI Symbol;Acc:MGI:1196356]	2.91032
Phldb2	pleckstrin homology-like domain, family B, member 2 [Source:MGI Symbol;Acc:MGI:2444981]	2.90864
Emilin3	elastin microfibril interfacer 3 [Source:MGI Symbol;Acc:MGI:2389142]	2.90476
Itga2b	integrin alpha 2b [Source:MGI Symbol;Acc:MGI:96601]	2.90393
Slc26a6	solute carrier family 26, member 6 [Source:MGI Symbol;Acc:MGI:2159728]	2.90296
Grb7	growth factor receptor bound protein 7 [Source:MGI Symbol;Acc:MGI:102683]	2.90219
Ypel1	yippee-like 1 (Drosophila) [Source:MGI Symbol;Acc:MGI:1913303]	2.89881
Glis3	GLIS family zinc finger 3 [Source:MGI Symbol;Acc:MGI:2444289]	2.89817
Gjc1	gap junction protein, gamma 1 [Source:MGI Symbol;Acc:MGI:95718]	2.89691
Bcor	BCL6 interacting corepressor [Source:MGI Symbol;Acc:MGI:1918708]	2.89605
Creb3l1	cAMP responsive element binding protein 3-like 1 [Source:MGI Symbol;Acc:MGI:1347062]	2.891
Lhx2	LIM homeobox protein 2 [Source:MGI Symbol;Acc:MGI:96785]	2.88546
Bzrap1	benzodiazepine receptor associated protein 1 [Source:MGI Symbol;Acc:MGI:2450877]	2.88311
Ptpru	protein tyrosine phosphatase, receptor type, U [Source:MGI Symbol;Acc:MGI:1321151]	2.88045
Cpe	carboxypeptidase E [Source:MGI Symbol;Acc:MGI:101932]	2.8774
Nbl1	neuroblastoma, suppression of tumorigenicity 1 [Source:MGI Symbol;Acc:MGI:104591]	2.87235
Rac3	RAS-related C3 botulinum substrate 3 [Source:MGI Symbol;Acc:MGI:2180784]	2.87032
Dusp8	dual specificity phosphatase 8 [Source:MGI Symbol;Acc:MGI:106626]	2.85126
Aipl1	aryl hydrocarbon receptor-interacting protein-like 1 [Source:MGI Symbol;Acc:MGI:2148800]	2.84967
Enpp5	ectonucleotide pyrophosphatase/phosphodiesterase 5 [Source:MGI Symbol;Acc:MGI:1933830]	2.84922
Slc7a8	solute carrier family 7 (cationic amino acid transporter, y+ system), member 8 [Source:MGI Symbol;Acc:MGI:1355323]	2.84757
BC018242	cDNA sequence BC018242 [Source:MGI Symbol;Acc:MGI:2384575]	2.84591
Lrrc8e	leucine rich repeat containing 8 family, member E [Source:MGI Symbol;Acc:MGI:1919517]	2.84491
Galnt3	No description	2.83827
A330049M08Rik	RIKEN cDNA A330049M08 gene [Source:MGI Symbol;Acc:MGI:2444888]	2.83622
Meis3	Meis homeobox 3 [Source:MGI Symbol;Acc:MGI:108519]	2.83451
Scnn1a	sodium channel, nonvoltage-gated 1 alpha [Source:MGI Symbol;Acc:MGI:101782]	2.83323
Slco3a1	solute carrier organic anion transporter family, member 3a1 [Source:MGI Symbol;Acc:MGI:1351867]	2.83308
Jhdm1d	RIKEN cDNA 4930599N23 gene [Source:MGI Symbol;Acc:MGI:1922629]	2.82954
BC066135	cDNA sequence BC066135 [Source:MGI Symbol;Acc:MGI:3606212]	2.82831
Asap3	ArfGAP with SH3 domain, ankyrin repeat and PH domain 3 [Source:MGI Symbol;Acc:MGI:2684986]	2.82741
Otud7a	OTU domain containing 7A [Source:MGI Symbol;Acc:MGI:2158505]	2.82664
Dixdc1	DIX domain containing 1 [Source:MGI Symbol;Acc:MGI:2679721]	2.82607
Gli1	Rho GTPase activating protein 9 [Source:MGI Symbol;Acc:MGI:2143764]	2.82264
Crip2	cysteine rich protein 2 [Source:MGI Symbol;Acc:MGI:1915587]	2.82044
A430105I19Rik	RIKEN cDNA A430105I19 gene [Source:MGI Symbol;Acc:MGI:2685199]	2.81398
Krt14	keratin 14 [Source:MGI Symbol;Acc:MGI:96688]	2.81094
Ccdc64b	coiled-coil domain containing 64B [Source:MGI Symbol;Acc:MGI:2388267]	2.81049
L3mbtl3	l(3)mbt-like 3 (Drosophila) [Source:MGI Symbol;Acc:MGI:2143628]	2.80933
Cryl1	crystallin, lambda 1 [Source:MGI Symbol;Acc:MGI:1915881]	2.80591
1190002H23Rik	RIKEN cDNA 1190002H23 gene [Source:MGI Symbol;Acc:MGI:1913464]	2.80422
Tbx20	T-box 20 [Source:MGI Symbol;Acc:MGI:1888496]	2.79735
P4ha2	procollagen-proline, 2-oxoglutarate 4-dioxygenase (proline 4-hydroxylase), alpha II polypeptide [Source:MGI Symbol;Acc:MGI:894286]	2.79325
Entpd5	ectonucleoside triphosphate diphosphohydrolase 5 [Source:MGI Symbol;Acc:MGI:1321385]	2.79214
Elovl4	elongation of very long chain fatty acids (FEN1/Elo2, SUR4/Elo3, yeast)-like 4 [Source:MGI Symbol;Acc:MGI:1933331]	2.78929
Dlx3	distal-less homeobox 3 [Source:MGI Symbol;Acc:MGI:94903]	2.7869
Crb3	solute carrier family 25 (mitochondrial carrier; phosphate carrier), member 23 [Source:MGI Symbol;Acc:MGI:1914222]	2.77938
Gpr157	G protein-coupled receptor 157 [Source:MGI Symbol;Acc:MGI:2442046]	2.77775
Plxdc2	plexin domain containing 2 [Source:MGI Symbol;Acc:MGI:1914698]	2.76904
Slc39a14	solute carrier family 39 (zinc transporter), member 14 [Source:MGI Symbol;Acc:MGI:2384851]	2.7658
4921507P07Rik	RIKEN cDNA 5430402O13 gene [Source:MGI Symbol;Acc:MGI:1918631]	2.76146
Rtn4rl1	reticulon 4 receptor-like 1 [Source:MGI Symbol;Acc:MGI:2661375]	2.75542
Parp12	poly (ADP-ribose) polymerase family, member 12 [Source:MGI Symbol;Acc:MGI:2143990]	2.75374
9030418K01Rik	RIKEN cDNA 9030418K01 gene [Source:MGI Symbol;Acc:MGI:1918782]	2.75362
Zfp618	zinc fingerprotein 618 [Source:MGI Symbol;Acc:MGI:1919950]	2.7505
Mest	mesoderm specific transcript [Source:MGI Symbol;Acc:MGI:96968]	2.74712
2004-09-01	predicted gene 11492 [Source:MGI Symbol;Acc:MGI:3651136]	2.74248
Prkd1	protein kinase D1 [Source:MGI Symbol;Acc:MGI:99879]	2.73557
2010300C02Rik	RIKEN cDNA 2010300C02 gene [Source:MGI Symbol;Acc:MGI:1919347]	2.73111
Slc44a4	solute carrier family 44, member 4 [Source:MGI Symbol;Acc:MGI:1917379]	2.73089
Krt18	keratin 18 [Source:MGI Symbol;Acc:MGI:96692]	2.72882
Zfhx2	predicted gene 20687 [Source:MGI Symbol;Acc:MGI:5313134]	2.72511
Mfsd2a	major facilitator superfamily domain containing 2A [Source:MGI Symbol;Acc:MGI:1923824]	2.71937
Nipal4	NIPA-like domain containing 4 [Source:MGI Symbol;Acc:MGI:2444671]	2.71932
Padi2	peptidyl arginine deiminase, type II [Source:MGI Symbol;Acc:MGI:1338892]	2.71534
Bmi1	Bmi1 polycomb ring finger oncogene [Source:MGI Symbol;Acc:MGI:88174]	2.7146
Col11a2	collagen, type XI, alpha 2 [Source:MGI Symbol;Acc:MGI:88447]	2.71293
Chst2	carbohydrate sulfotransferase 2 [Source:MGI Symbol;Acc:MGI:1891160]	2.70997
Mtap2	microtubule-associated protein 2 [Source:MGI Symbol;Acc:MGI:97175]	2.70929
Ppp1r13b	protein phosphatase 1, regulatory (inhibitor) subunit 13B [Source:MGI Symbol;Acc:MGI:1336199]	2.70612
Rasa4	RAS p21 protein activator 4 [Source:MGI Symbol;Acc:MGI:1858600]	2.7059
Aff3	AF4/FMR2 family, member 3 [Source:MGI Symbol;Acc:MGI:106927]	2.69865
Acsl6	acyl-CoA synthetase long-chain family member 6 [Source:MGI Symbol;Acc:MGI:894291]	2.69759
Nup210	nucleoporin 210 [Source:MGI Symbol;Acc:MGI:1859555]	2.6969
Mal2	mal, T cell differentiation protein 2 [Source:MGI Symbol;Acc:MGI:2146021]	2.69215
Jag1	jagged 1 [Source:MGI Symbol;Acc:MGI:1095416]	2.68996
Vamp8	vesicle-associated membrane protein 8 [Source:MGI Symbol;Acc:MGI:1336882]	2.68925
Arhgef26	Rho guanine nucleotide exchange factor (GEF) 26 [Source:MGI Symbol;Acc:MGI:1918053]	2.68873
Taf9b	TAF9B RNA polymerase II, TATA box binding protein (TBP)-associated factor [Source:MGI Symbol;Acc:MGI:3039562]	2.68768
Id3	inhibitor of DNA binding 3 [Source:MGI Symbol;Acc:MGI:96398]	2.68662
Ammecr1	Alport syndrome, mental retardation, midface hypoplasia and elliptocytosis chromosomal region gene 1 homolog (human) [Source:MGI Symbol;Acc:MGI:1860206]	2.67469
Entpd2	ectonucleoside triphosphate diphosphohydrolase 2 [Source:MGI Symbol;Acc:MGI:1096863]	2.67235
Cacna1b	calcium channel, voltage-dependent, N type, alpha 1B subunit [Source:MGI Symbol;Acc:MGI:88296]	2.66525
Me1	malic enzyme 1, NADP(+)-dependent, cytosolic [Source:MGI Symbol;Acc:MGI:97043]	2.66483
Lrrcc1	leucine rich repeat and coiled-coil domain containing 1 [Source:MGI Symbol;Acc:MGI:1918960]	2.6576
Rasgef1b	RasGEF domain family, member 1B [Source:MGI Symbol;Acc:MGI:2443755]	2.64425
Agbl2	ATP/GTP binding protein-like 2 [Source:MGI Symbol;Acc:MGI:2443254]	2.64389
Epor	erythropoietin receptor [Source:MGI Symbol;Acc:MGI:95408]	2.63999
Sult4a1	sulfotransferase family 4A, member 1 [Source:MGI Symbol;Acc:MGI:1888971]	2.63762
Spr	sepiapterin reductase [Source:MGI Symbol;Acc:MGI:103078]	2.63525
Tbx18	T-box18 [Source:MGI Symbol;Acc:MGI:1923615]	2.6342
Slc2a3	solute carrier family 2 (facilitated glucose transporter), member 3 [Source:MGI Symbol;Acc:MGI:95757]	2.63062
Madd	MAP-kinase activating death domain [Source:MGI Symbol;Acc:MGI:2444672]	2.63038
Cbr3	carbonyl reductase 3 [Source:MGI Symbol;Acc:MGI:1309992]	2.62307
Pfkfb2	No description	2.62287
Mal	myelin and lymphocyte protein, T cell differentiation protein [Source:MGI Symbol;Acc:MGI:892970]	2.62252
Sirpa	signal-regulatory protein alpha [Source:MGI Symbol;Acc:MGI:108563]	2.61367
Npr2	predicted gene 12473 [Source:MGI Symbol;Acc:MGI:3652337]	2.60844
Plekha3	pleckstrin homology domain-containing, family A (phosphoinositide binding specific) member 3 [Source:MGI Symbol;Acc:MGI:1932515]	2.60684
Col6a2	collagen, type VI, alpha 2 [Source:MGI Symbol;Acc:MGI:88460]	2.60428
Camkk1	calcium/calmodulin-dependent protein kinase kinase 1, alpha [Source:MGI Symbol;Acc:MGI:1891766]	2.60419
Sh3yl1	Sh3 domain YSC-like 1 [Source:MGI Symbol;Acc:MGI:1346118]	2.60102
Plekhg6	pleckstrin homology domain containing, family G (with RhoGef domain) member 6 [Source:MGI Symbol;Acc:MGI:2682298]	2.6007
Trim46	tripartite motif-containing 46 [Source:MGI Symbol;Acc:MGI:2673000]	2.60005
Kcnab3	potassium voltage-gated channel, shaker-related subfamily, beta member 3 [Source:MGI Symbol;Acc:MGI:1336208]	2.59948
Fgd3	FYVE, RhoGEF and PH domain containing 3 [Source:MGI Symbol;Acc:MGI:1353657]	2.59486
Ppl	periplakin [Source:MGI Symbol;Acc:MGI:1194898]	2.59426
Wnk4	WNK lysine deficient protein kinase 4 [Source:MGI Symbol;Acc:MGI:1917097]	2.5941
Cited1	Cbp/p300-interacting transactivator with Glu/Asp-rich carboxy-terminal domain 1 [Source:MGI Symbol;Acc:MGI:108023]	2.59322
Ets1	E26 avian leukemia oncogene 1, 5' domain [Source:MGI Symbol;Acc:MGI:95455]	2.59061
Srxn1	sulfiredoxin 1 homolog (S. cerevisiae) [Source:MGI Symbol;Acc:MGI:104971]	2.59028
Hcn2	hyperpolarization-activated, cyclic nucleotide-gated K+ 2 [Source:MGI Symbol;Acc:MGI:1298210]	2.57966
Kif26a	kinesin family member 26A [Source:MGI Symbol;Acc:MGI:2447072]	2.57919
Bdh1	3-hydroxybutyrate dehydrogenase, type 1 [Source:MGI Symbol;Acc:MGI:1919161]	2.57513
Pmaip1	phorbol-12-myristate-13-acetate-induced protein 1 [Source:MGI Symbol;Acc:MGI:1930146]	2.57327
Rassf5	eukaryotic translation initiation factor 2D [Source:MGI Symbol;Acc:MGI:109342]	2.56755
Spnb1	spectrin beta 1 [Source:MGI Symbol;Acc:MGI:98387]	2.56311
Nrn1	neuritin 1 [Source:MGI Symbol;Acc:MGI:1915654]	2.55988
Dsp	desmoplakin [Source:MGI Symbol;Acc:MGI:109611]	2.55924
2003-03-01	membrane-associated ring finger (C3HC4) 3 [Source:MGI Symbol;Acc:MGI:2443667]	2.55316
Marcks	myristoylated alanine rich protein kinase C substrate [Source:MGI Symbol;Acc:MGI:96907]	2.55198
5430407P10Rik	RIKEN cDNA 5430407P10 gene [Source:MGI Symbol;Acc:MGI:2442238]	2.55131
Rasal1	RAS protein activator like 1 (GAP1 like) [Source:MGI Symbol;Acc:MGI:1330842]	2.55013
Lpin3	predicted gene, 16751 [Source:MGI Symbol;Acc:MGI:4439675]	2.54771
Dram1	DNA-damage regulated autophagy modulator 1 [Source:MGI Symbol;Acc:MGI:1918962]	2.5471
Fgd2	FYVE, RhoGEF and PH domain containing 2 [Source:MGI Symbol;Acc:MGI:1347084]	2.54459
Igf2bp2	insulin-like growth factor 2 mRNA binding protein 2 [Source:MGI Symbol;Acc:MGI:1890358]	2.54444
Ccdc116	coiled-coil domain containing 116 [Source:MGI Symbol;Acc:MGI:1924122]	2.54292
Mitf	microphthalmia-associated transcription factor [Source:MGI Symbol;Acc:MGI:104554]	2.54225
Kiss1r	RIKEN cDNA C030046I01 gene [Source:MGI Symbol;Acc:MGI:1924814]	2.54127
Rims4	regulating synaptic membrane exocytosis 4 [Source:MGI Symbol;Acc:MGI:2674366]	2.54042
Bcas1	breast carcinoma amplified sequence 1 [Source:MGI Symbol;Acc:MGI:1924210]	2.53646
Sdc3	syndecan 3 [Source:MGI Symbol;Acc:MGI:1349163]	2.53459
Socs1	suppressor of cytokine signaling 1 [Source:MGI Symbol;Acc:MGI:1354910]	2.52359
Elovl2	elongation of very long chain fatty acids (FEN1/Elo2, SUR4/Elo3, yeast)-like 2 [Source:MGI Symbol;Acc:MGI:1858960]	2.52085
Plxnd1	plexin D1 [Source:MGI Symbol;Acc:MGI:2154244]	2.52016
Dbndd1	predicted gene 20388 [Source:MGI Symbol;Acc:MGI:5141853]	2.51874
Rhpn2	rhophilin, Rho GTPase binding protein 2 [Source:MGI Symbol;Acc:MGI:1289234]	2.5177
Mfsd7a	major facilitator superfamily domain containing 7A [Source:MGI Symbol;Acc:MGI:2442629]	2.51603
Hoxc13	homeobox C13 [Source:MGI Symbol;Acc:MGI:99560]	2.515
Tgm1	transglutaminase 1, K polypeptide [Source:MGI Symbol;Acc:MGI:98730]	2.51346
Lrrc32	leucine rich repeat containing 32 [Source:MGI Symbol;Acc:MGI:93882]	2.51128
Tnfrsf1a	tumor necrosis factor receptor superfamily, member 1a [Source:MGI Symbol;Acc:MGI:1314884]	2.50814
Hmcn2	hemicentin 2 [Source:MGI Symbol;Acc:MGI:2677838]	2.50476
Mak	male germ cell-associated kinase [Source:MGI Symbol;Acc:MGI:96913]	2.50033
Leprel1	predicted gene 4524 [Source:MGI Symbol;Acc:MGI:3782709]	2.49851
Foxj2	forkhead box J2 [Source:MGI Symbol;Acc:MGI:1926805]	2.49823
Pak1	p21 protein (Cdc42/Rac)-activated kinase 1 [Source:MGI Symbol;Acc:MGI:1339975]	2.49762
Fam46c	family with sequence similarity 46, member C [Source:MGI Symbol;Acc:MGI:1921895]	2.48969
Cdk18	cyclin-dependent kinase 18 [Source:MGI Symbol;Acc:MGI:97518]	2.48519
Brwd3	bromodomain and WD repeat domain containing 3 [Source:MGI Symbol;Acc:MGI:3029414]	2.48464
Grik3	glutamate receptor, ionotropic, kainate 3 [Source:MGI Symbol;Acc:MGI:95816]	2.48373
Sdc4	syndecan 4 [Source:MGI Symbol;Acc:MGI:1349164]	2.4739
Fam63b	family with sequence similarity 63, member B [Source:MGI Symbol;Acc:MGI:2443086]	2.47222
Hipk2	homeodomain interacting protein kinase 2 [Source:MGI Symbol;Acc:MGI:1314872]	2.47159
Mapk13	mitogen-activated protein kinase 13 [Source:MGI Symbol;Acc:MGI:1346864]	2.47008
Gyltl1b	glycosyltransferase-like 1B [Source:MGI Symbol;Acc:MGI:2443769]	2.46901
Fhdc1	FH2 domain containing 1 [Source:MGI Symbol;Acc:MGI:2684972]	2.46763
Fbxo32	F-box protein 32 [Source:MGI Symbol;Acc:MGI:1914981]	2.46645
Cxadr	coxsackie virus and adenovirus receptor [Source:MGI Symbol;Acc:MGI:1201679]	2.46439
Wnk2	WNK lysine deficient protein kinase 2 [Source:MGI Symbol;Acc:MGI:1922857]	2.4629
St14	suppression of tumorigenicity 14 (colon carcinoma) [Source:MGI Symbol;Acc:MGI:1338881]	2.4617
Ctdspl	CTD (carboxy-terminal domain, RNA polymerase II, polypeptide A) small phosphatase-like [Source:MGI Symbol;Acc:MGI:1916524]	2.45807
Zfp697	zinc finger protein 697 [Source:MGI Symbol;Acc:MGI:2139736]	2.45701
Tmem54	transmembrane protein 54 [Source:MGI Symbol;Acc:MGI:1913510]	2.45699
Tmem184a	v-maf musculoaponeurotic fibrosarcoma oncogene family, protein K (avian) [Source:MGI Symbol;Acc:MGI:99951]	2.45046
Slc22a21	solute carrier family 22 (organic cation transporter), member 21 [Source:MGI Symbol;Acc:MGI:1929481]	2.44616
Kbtbd8	RIKEN cDNA 1700010K10 gene [Source:MGI Symbol;Acc:MGI:1919467]	2.44311
Ehd2	EH-domain containing 2 [Source:MGI Symbol;Acc:MGI:2154274]	2.43822
Rasd1	RAS, dexamethasone-induced 1 [Source:MGI Symbol;Acc:MGI:1270848]	2.43586
Tmem53	predicted gene 1661 [Source:MGI Symbol;Acc:MGI:2686507]	2.43315
Tap1	proteasome (prosome, macropain) subunit, beta type 9 (large multifunctional peptidase 2) [Source:MGI Symbol;Acc:MGI:1346526]	2.42968
Sgk1	serum/glucocorticoid regulated kinase 1 [Source:MGI Symbol;Acc:MGI:1340062]	2.42832
Arhgap8	Rho GTPase activating protein 8 [Source:MGI Symbol;Acc:MGI:1920417]	2.42535
Aplf	aprataxin and PNKP like factor [Source:MGI Symbol;Acc:MGI:1919353]	2.42429
Adamts20	a disintegrin-like and metallopeptidase (reprolysin type) with thrombospondin type 1 motif, 20 [Source:MGI Symbol;Acc:MGI:2660628]	2.42229
Tpi1	splA/ryanodine receptor domain and SOCS box containing 2 [Source:MGI Symbol;Acc:MGI:1315199]	2.4212
Zmynd17	zinc finger, MYND domain containing 17 [Source:MGI Symbol;Acc:MGI:1922093]	2.41968
Pls1	plastin 1 (I-isoform) [Source:MGI Symbol;Acc:MGI:104809]	2.41727
Tubb4a	tubulin, beta 4A class IVA [Source:MGI Symbol;Acc:MGI:107848]	2.41501
Hmgn3	high mobility group nucleosomal binding domain 3 [Source:MGI Symbol;Acc:MGI:2138069]	2.41328
6030405A18Rik	RIKEN cDNA 6030405A18 gene [Source:MGI Symbol;Acc:MGI:3607715]	2.41229
Trim62	tripartite motif-containing 62 [Source:MGI Symbol;Acc:MGI:1914775]	2.41135
Mfsd7c	major facilitator superfamily domain containing 7C [Source:MGI Symbol;Acc:MGI:2384974]	2.40921
Pex26	peroxisomal biogenesis factor 26 [Source:MGI Symbol;Acc:MGI:1921293]	2.40523
Il17re	interleukin 17 receptor E [Source:MGI Symbol;Acc:MGI:1889371]	2.40266
CT030661.1	uncharacterized protein LOC240038 [Source:RefSeq peptide;Acc:NP_001192024]	2.40016
B630005N14Rik	RIKEN cDNA B630005N14 gene [Source:MGI Symbol;Acc:MGI:2141466]	2.39622
Pax3	paired box gene 3 [Source:MGI Symbol;Acc:MGI:97487]	2.3944
Ano9	anoctamin 9 [Source:MGI Symbol;Acc:MGI:1918595]	2.39287
Sec14l2	SEC14-like 2 (S. cerevisiae) [Source:MGI Symbol;Acc:MGI:1915065]	2.38753
Fam125b	family with sequence similarity 125, member B [Source:MGI Symbol;Acc:MGI:1919793]	2.38748
Rab11fip5	RAB11 family interacting protein 5 (class I) [Source:MGI Symbol;Acc:MGI:1098586]	2.38731
Mpp2	membrane protein, palmitoylated 2 (MAGUK p55 subfamily member 2) [Source:MGI Symbol;Acc:MGI:1858257]	2.37962
Gprasp2	G protein-coupled receptor associated sorting protein 2 [Source:MGI Symbol;Acc:MGI:2442071]	2.37664
Abcg4	ATP-binding cassette, sub-family G (WHITE), member 4 [Source:MGI Symbol;Acc:MGI:1890594]	2.37512
Bspry	B-box and SPRY domain containing [Source:MGI Symbol;Acc:MGI:2177191]	2.35943
Dlg3	discs, large homolog 3 (Drosophila) [Source:MGI Symbol;Acc:MGI:1888986]	2.35845
Dmxl2	Dmx-like 2 [Source:MGI Symbol;Acc:MGI:2444630]	2.35603
Igsf9b	immunoglobulin superfamily, member 9B [Source:MGI Symbol;Acc:MGI:2685354]	2.33685
Dnajc12	DnaJ (Hsp40) homolog, subfamily C, member 12 [Source:MGI Symbol;Acc:MGI:1353428]	2.33653
Sms	spermine synthase [Source:MGI Symbol;Acc:MGI:109490]	2.33651
Stk36	serine/threonine kinase 36 (fused homolog, Drosophila) [Source:MGI Symbol;Acc:MGI:1920831]	2.3363
Mum1l1	melanoma associated antigen (mutated) 1-like 1 [Source:MGI Symbol;Acc:MGI:2445062]	2.32798
Ocln	occludin [Source:MGI Symbol;Acc:MGI:106183]	2.32533
Rnf207	isoprenylcysteine carboxyl methyltransferase [Source:MGI Symbol;Acc:MGI:1888594]	2.32472
Oas3	2'-5' oligoadenylate synthetase 3 [Source:MGI Symbol;Acc:MGI:2180850]	2.32277
Tuba4a	serine/threonine kinase 16 [Source:MGI Symbol;Acc:MGI:1313271]	2.32259
Hoxd13	homeobox D13 [Source:MGI Symbol;Acc:MGI:96205]	2.32117
Marveld3	MARVEL (membrane-associating) domain containing 3 [Source:MGI Symbol;Acc:MGI:1920858]	2.31903
Tap2	predicted gene 20496 [Source:MGI Symbol;Acc:MGI:5141961]	2.31769
Map3k14	mitogen-activated protein kinase kinase kinase 14 [Source:MGI Symbol;Acc:MGI:1858204]	2.31594
Tex15	testis expressed gene 15 [Source:MGI Symbol;Acc:MGI:1934816]	2.31529
Cdh3	cadherin 3 [Source:MGI Symbol;Acc:MGI:88356]	2.31181
Stambp	STAM binding protein [Source:MGI Symbol;Acc:MGI:1917777]	2.30822
Ttc8	tetratricopeptide repeat domain 8 [Source:MGI Symbol;Acc:MGI:1923510]	2.30741
Cdc42ep3	CDC42 effector protein (Rho GTPase binding) 3 [Source:MGI Symbol;Acc:MGI:2384718]	2.30563
Fads2	fatty acid desaturase 2 [Source:MGI Symbol;Acc:MGI:1930079]	2.30437
2210403K04Rik	RIKEN cDNA 2210403K04 gene [Source:MGI Symbol;Acc:MGI:1914348]	2.30353
Ccdc164	coiled-coil domain containing 164 [Source:MGI Symbol;Acc:MGI:2685906]	2.30192
Prokr1	prokineticin receptor 1 [Source:MGI Symbol;Acc:MGI:1929676]	2.30086
Six5	sine oculis-related homeobox 5 homolog (Drosophila) [Source:MGI Symbol;Acc:MGI:106220]	2.29982
Eras	proprotein convertase subtilisin/kexin type 1 inhibitor [Source:MGI Symbol;Acc:MGI:1353431]	2.29872
B4galnt3	beta-1,4-N-acetyl-galactosaminyl transferase 3 [Source:MGI Symbol;Acc:MGI:3041155]	2.29726
Lsp1	lymphocyte specific 1 [Source:MGI Symbol;Acc:MGI:96832]	2.29634
Rgl3	ral guanine nucleotide dissociation stimulator-like 3 [Source:MGI Symbol;Acc:MGI:1918996]	2.29615
Dlk2	delta-like 2 homolog (Drosophila) [Source:MGI Symbol;Acc:MGI:2146838]	2.29534
Lcp1	lymphocyte cytosolic protein 1 [Source:MGI Symbol;Acc:MGI:104808]	2.295
Stat6	signal transducer and activator of transcription 6 [Source:MGI Symbol;Acc:MGI:103034]	2.29421
Fam160a1	ADP-ribosylation factor interacting protein 1 [Source:MGI Symbol;Acc:MGI:1277120]	2.29036
Ripply3	ripply3 homolog (zebrafish) [Source:MGI Symbol;Acc:MGI:2181192]	2.2897
Syt9	synaptotagmin IX [Source:MGI Symbol;Acc:MGI:1926373]	2.28512
Trove2	TROVE domain family, member 2 [Source:MGI Symbol;Acc:MGI:106652]	2.28385
Trim54	tripartite motif-containing 54 [Source:MGI Symbol;Acc:MGI:1889623]	2.28227
Rnf130	ring finger protein 130 [Source:MGI Symbol;Acc:MGI:1891717]	2.28132
Fzd5	frizzled homolog 5 (Drosophila) [Source:MGI Symbol;Acc:MGI:108571]	2.27852
Grn	granulin [Source:MGI Symbol;Acc:MGI:95832]	2.27567
Osgin1	oxidative stress induced growth inhibitor 1 [Source:MGI Symbol;Acc:MGI:1919089]	2.27137
Dgkh	diacylglycerol kinase, eta [Source:MGI Symbol;Acc:MGI:2444188]	2.27134
Kank4	KN motif and ankyrin repeat domains 4 [Source:MGI Symbol;Acc:MGI:3043381]	2.2703
Plxna2	plexin A2 [Source:MGI Symbol;Acc:MGI:107684]	2.26995
Tk1	predicted gene 20708 [Source:MGI Symbol;Acc:MGI:5313155]	2.26927
Cldn26	claudin 26 [Source:MGI Symbol;Acc:MGI:1921970]	2.26925
Zhx1	RIKEN cDNA 9130401M01 gene [Source:MGI Symbol;Acc:MGI:1923008]	2.26907
Bace1	beta-site APP cleaving enzyme 1 [Source:MGI Symbol;Acc:MGI:1346542]	2.26483
Stbd1	starch binding domain 1 [Source:MGI Symbol;Acc:MGI:1261768]	2.26094
Dsel	dermatan sulfate epimerase-like [Source:MGI Symbol;Acc:MGI:2442948]	2.2601
Igfbp6	insulin-like growth factor binding protein 6 [Source:MGI Symbol;Acc:MGI:96441]	2.25932
Glcci1	predicted gene 16039 [Source:MGI Symbol;Acc:MGI:3840148]	2.25588
Lrrc56	leucine rich repeat containing 56 [Source:MGI Symbol;Acc:MGI:1917802]	2.25361
Cobll1	Cobl-like 1 [Source:MGI Symbol;Acc:MGI:2442894]	2.25343
Ppp4r4	protein phosphatase 4, regulatory subunit 4 [Source:MGI Symbol;Acc:MGI:1921771]	2.24982
Mocos	molybdenum cofactor sulfurase [Source:MGI Symbol;Acc:MGI:1915841]	2.24864
Cadm1	cell adhesion molecule 1 [Source:MGI Symbol;Acc:MGI:1889272]	2.24339
Dusp10	dual specificity phosphatase 10 [Source:MGI Symbol;Acc:MGI:1927070]	2.24179
Usp28	ubiquitin specific peptidase 28 [Source:MGI Symbol;Acc:MGI:2442293]	2.2405
Phka1	phosphorylase kinase alpha 1 [Source:MGI Symbol;Acc:MGI:97576]	2.2351
Tex19.1	testis expressed gene 19.1 [Source:MGI Symbol;Acc:MGI:1920929]	2.23445
Eif4e3	predicted gene 20696 [Source:MGI Symbol;Acc:MGI:5313143]	2.23411
Abcb1b	ATP-binding cassette, sub-family B (MDR/TAP), member 1B [Source:MGI Symbol;Acc:MGI:97568]	2.23336
Kit	kit oncogene [Source:MGI Symbol;Acc:MGI:96677]	2.23281
Gadd45b	growth arrest and DNA-damage-inducible 45 beta [Source:MGI Symbol;Acc:MGI:107776]	2.22843
Taf7l	TAF7-like RNA polymerase II, TATA box binding protein (TBP)-associated factor [Source:MGI Symbol;Acc:MGI:1921719]	2.22771
Nfatc2	nuclear factor of activated T cells, cytoplasmic, calcineurin dependent 2 [Source:MGI Symbol;Acc:MGI:102463]	2.22489
Igtp	interferon gamma induced GTPase [Source:MGI Symbol;Acc:MGI:107729]	2.22437
Cited2	Cbp/p300-interacting transactivator, with Glu/Asp-rich carboxy-terminal domain, 2 [Source:MGI Symbol;Acc:MGI:1306784]	2.22313
Ecm1	extracellular matrix protein 1 [Source:MGI Symbol;Acc:MGI:103060]	2.21999
Coro1a	coronin, actin binding protein 1A [Source:MGI Symbol;Acc:MGI:1345961]	2.21928
Fn1	fibronectin 1 [Source:MGI Symbol;Acc:MGI:95566]	2.21219
Gnaz	rhabdoid tumor deletion region gene 1 [Source:MGI Symbol;Acc:MGI:1918486]	2.21173
Slc7a4	purinergic receptor P2X, ligand-gated ion channel, 6 [Source:MGI Symbol;Acc:MGI:1337113]	2.21006
Anxa4	annexin A4 [Source:MGI Symbol;Acc:MGI:88030]	2.2081
Klhdc8b	kelch domain containing 8B [Source:MGI Symbol;Acc:MGI:1925517]	2.20699
Fzd7	frizzled homolog 7 (Drosophila) [Source:MGI Symbol;Acc:MGI:108570]	2.20672
Hes6	hairy and enhancer of split 6 (Drosophila) [Source:MGI Symbol;Acc:MGI:1859852]	2.20588
Rnf208	RIKEN cDNA 2310002J15 gene [Source:MGI Symbol;Acc:MGI:1915109]	2.20577
Pdk2	pyruvate dehydrogenase kinase, isoenzyme 2 [Source:MGI Symbol;Acc:MGI:1343087]	2.20396
Acvrl1	activin A receptor, type II-like 1 [Source:MGI Symbol;Acc:MGI:1338946]	2.20225
Zfp946	zinc finger protein 946 [Source:MGI Symbol;Acc:MGI:1921399]	2.20169
Dtx3l	deltex 3-like (Drosophila) [Source:MGI Symbol;Acc:MGI:2656973]	2.1982
Dok2	exportin 7 [Source:MGI Symbol;Acc:MGI:1929705]	2.19669
Mlxipl	MLX interacting protein-like [Source:MGI Symbol;Acc:MGI:1927999]	2.19601
Trpv4	transient receptor potential cation channel, subfamily V, member 4 [Source:MGI Symbol;Acc:MGI:1926945]	2.19269
Amot	angiomotin [Source:MGI Symbol;Acc:MGI:108440]	2.18908
Gsta4	glutathione S-transferase, alpha 4 [Source:MGI Symbol;Acc:MGI:1309515]	2.18735
AC133939.1	Tubulin beta-5 chain [Source:UniProtKB/TrEMBL;Acc:G3UZR1]	2.18546
Mxd4	Max dimerization protein 4 [Source:MGI Symbol;Acc:MGI:104991]	2.18532
Mon1a	MON1 homolog A (yeast) [Source:MGI Symbol;Acc:MGI:1920075]	2.18006
4930523C07Rik	RIKEN cDNA 4930523C07 gene [Source:MGI Symbol;Acc:MGI:1914897]	2.17915
Pdlim4	PDZ and LIM domain 4 [Source:MGI Symbol;Acc:MGI:1353470]	2.17859
Pank1	pantothenate kinase 1 [Source:MGI Symbol;Acc:MGI:1922985]	2.17694
Lphn2	latrophilin 2 [Source:MGI Symbol;Acc:MGI:2139714]	2.1749
Zbtb4	zinc finger and BTB domain containing 4 [Source:MGI Symbol;Acc:MGI:1922830]	2.17302
Rhpn1	rhophilin, Rho GTPase binding protein 1 [Source:MGI Symbol;Acc:MGI:1098783]	2.17179
Aldoc	aldolase C, fructose-bisphosphate [Source:MGI Symbol;Acc:MGI:101863]	2.16957
Gm2a	GM2 ganglioside activator protein [Source:MGI Symbol;Acc:MGI:95762]	2.16956
Thsd4	thrombospondin, type I, domain containing 4 [Source:MGI Symbol;Acc:MGI:2672033]	2.16897
Plekhh2	pleckstrin homology domain containing, family H (with MyTH4 domain) member 2 [Source:MGI Symbol;Acc:MGI:2146813]	2.16722
2010015L04Rik	RIKEN cDNA 5830444B04 gene [Source:MGI Symbol;Acc:MGI:3603170]	2.16659
Ubn2	ubinuclein 2 [Source:MGI Symbol;Acc:MGI:2444236]	2.16635
Igfbp2	insulin-like growth factor binding protein 2 [Source:MGI Symbol;Acc:MGI:96437]	2.16527
St3gal5	ST3 beta-galactoside alpha-2,3-sialyltransferase 5 [Source:MGI Symbol;Acc:MGI:1339963]	2.15855
Zfp185	zinc finger protein 185 [Source:MGI Symbol;Acc:MGI:108095]	2.15833
Cyp4f17	cytochrome P450, family 4, subfamily f, polypeptide 17 [Source:MGI Symbol;Acc:MGI:3646233]	2.15833
Arid3a	AT rich interactive domain 3A (BRIGHT-like) [Source:MGI Symbol;Acc:MGI:1328360]	2.15601
Vwa5a	von Willebrand factor A domain containing 5A [Source:MGI Symbol;Acc:MGI:1915026]	2.1557
Gstt3	predicted gene 20441 [Source:MGI Symbol;Acc:MGI:5141906]	2.15402
Eml1	echinoderm microtubule associated protein like 1 [Source:MGI Symbol;Acc:MGI:1915769]	2.15401
Ptprs	protein tyrosine phosphatase, receptor type, S [Source:MGI Symbol;Acc:MGI:97815]	2.15342
Phf16	PHD finger protein 16 [Source:MGI Symbol;Acc:MGI:2148019]	2.15034
Gnai1	guanine nucleotide binding protein (G protein), alpha inhibiting 1 [Source:MGI Symbol;Acc:MGI:95771]	2.14885
Mxra8	predicted gene 10562 [Source:MGI Symbol;Acc:MGI:3704241]	2.14807
Jph1	junctophilin 1 [Source:MGI Symbol;Acc:MGI:1891495]	2.14772
Zfp758	zinc finger protein 758 [Source:MGI Symbol;Acc:MGI:2385044]	2.14687
AI464131	expressed sequence AI464131 [Source:MGI Symbol;Acc:MGI:2140300]	2.14272
Shisa4	shisa homolog 4 (Xenopus laevis) [Source:MGI Symbol;Acc:MGI:1924802]	2.14155
Cadm4	cell adhesion molecule 4 [Source:MGI Symbol;Acc:MGI:2449088]	2.14029
Ptar1	protein prenyltransferase alpha subunit repeat containing 1 [Source:MGI Symbol;Acc:MGI:1921875]	2.14008
Vgll4	vestigial like 4 (Drosophila) [Source:MGI Symbol;Acc:MGI:2652840]	2.14001
B4galnt4	beta-1,4-N-acetyl-galactosaminyl transferase 4 [Source:MGI Symbol;Acc:MGI:2652891]	2.13766
Kif5a	kinesin family member 5A [Source:MGI Symbol;Acc:MGI:109564]	2.13695
Tbc1d8b	TBC1 domain family, member 8B [Source:MGI Symbol;Acc:MGI:1918101]	2.13653
Plcl2	phospholipase C-like 2 [Source:MGI Symbol;Acc:MGI:1352756]	2.13428
Bcl9l	B cell CLL/lymphoma 9-like [Source:MGI Symbol;Acc:MGI:1933114]	2.13273
Klc3	excision repair cross-complementing rodent repair deficiency, complementation group 2 [Source:MGI Symbol;Acc:MGI:95413]	2.13001
Tmem44	transmembrane protein 44 [Source:MGI Symbol;Acc:MGI:1924489]	2.12487
Jub	ajuba [Source:MGI Symbol;Acc:MGI:1341886]	2.12121
Hspa4l	heat shock protein 4 like [Source:MGI Symbol;Acc:MGI:107422]	2.11675
Rabl3	RAB, member of RAS oncogene family-like 3 [Source:MGI Symbol;Acc:MGI:1914907]	2.11668
Dpysl3	dihydropyrimidinase-like 3 [Source:MGI Symbol;Acc:MGI:1349762]	2.11506
Dstn	destrin [Source:MGI Symbol;Acc:MGI:1929270]	2.11027
Epha1	zyxin [Source:MGI Symbol;Acc:MGI:103072]	2.11024
Adamts9	a disintegrin-like and metallopeptidase (reprolysin type) with thrombospondin type 1 motif, 9 [Source:MGI Symbol;Acc:MGI:1916320]	2.10906
Cacna1c	calcium channel, voltage-dependent, L type, alpha 1C subunit [Source:MGI Symbol;Acc:MGI:103013]	2.10806
Ralgps1	Ral GEF with PH domain and SH3 binding motif 1 [Source:MGI Symbol;Acc:MGI:1922008]	2.1062
Slc8a2	solute carrier family 8 (sodium/calcium exchanger), member 2 [Source:MGI Symbol;Acc:MGI:107996]	2.10617
Mfsd12	major facilitator superfamily domain containing 12 [Source:MGI Symbol;Acc:MGI:3604804]	2.1033
Cpxm1	carboxypeptidase X 1 (M14 family) [Source:MGI Symbol;Acc:MGI:1934569]	2.1027
Pfn2	profilin 2 [Source:MGI Symbol;Acc:MGI:97550]	2.10093
Accn2	amiloride-sensitive cation channel 2, neuronal [Source:MGI Symbol;Acc:MGI:1194915]	2.10052
Sowahb	sosondowah ankyrin repeat domain family member B [Source:MGI Symbol;Acc:MGI:1925338]	2.10017
Vasn	coronin 7 [Source:MGI Symbol;Acc:MGI:1926135]	2.09711
Cnksr1	connector enhancer of kinase suppressor of Ras 1 [Source:MGI Symbol;Acc:MGI:2670958]	2.09664
Sesn3	sestrin 3 [Source:MGI Symbol;Acc:MGI:1922997]	2.09648
Rrad	Ras-related associated with diabetes [Source:MGI Symbol;Acc:MGI:1930943]	2.09638
Zxdc	ZXD family zinc finger C [Source:MGI Symbol;Acc:MGI:1933108]	2.09592
Il1rap	interleukin 1 receptor accessory protein [Source:MGI Symbol;Acc:MGI:104975]	2.09586
Aph1c	anterior pharynx defective 1c homolog (C. elegans) [Source:MGI Symbol;Acc:MGI:1915568]	2.09498
Rapgefl1	Rap guanine nucleotide exchange factor (GEF)-like 1 [Source:MGI Symbol;Acc:MGI:3611446]	2.09426
E330009J07Rik	RIKEN cDNA E330009J07 gene [Source:MGI Symbol;Acc:MGI:2444256]	2.09262
Sema6c	sema domain, transmembrane domain (TM), and cytoplasmic domain, (semaphorin) 6C [Source:MGI Symbol;Acc:MGI:1338032]	2.09226
Il17ra	interleukin 17 receptor A [Source:MGI Symbol;Acc:MGI:107399]	2.09117
Cyp11a1	cytochrome P450, family 11, subfamily a, polypeptide 1 [Source:MGI Symbol;Acc:MGI:88582]	2.08991
Slc2a4	solute carrier family 2 (facilitated glucose transporter), member 4 [Source:MGI Symbol;Acc:MGI:95758]	2.0894
Mfsd7b	major facilitator superfamily domain containing 7B [Source:MGI Symbol;Acc:MGI:2444881]	2.08934
Dnaja4	DnaJ (Hsp40) homolog, subfamily A, member 4 [Source:MGI Symbol;Acc:MGI:1927638]	2.08917
Fam164c	family with sequence similarity 164, member C [Source:MGI Symbol;Acc:MGI:1919600]	2.08897
Usp25	ubiquitin specific peptidase 25 [Source:MGI Symbol;Acc:MGI:1353655]	2.08854
Fzd3	frizzled homolog 3 (Drosophila) [Source:MGI Symbol;Acc:MGI:108476]	2.08791
Mical3	microtubule associated monoxygenase, calponin and LIM domain containing 3 [Source:MGI Symbol;Acc:MGI:2442733]	2.08716
Cdkn1c	cyclin-dependent kinase inhibitor 1C (P57) [Source:MGI Symbol;Acc:MGI:104564]	2.08667
Pdk3	pyruvate dehydrogenase kinase, isoenzyme 3 [Source:MGI Symbol;Acc:MGI:2384308]	2.08619
Mex3b	mex3 homolog B (C. elegans) [Source:MGI Symbol;Acc:MGI:1918252]	2.08497
Slc2a12	solute carrier family 2 (facilitated glucose transporter), member 12 [Source:MGI Symbol;Acc:MGI:3052471]	2.08373
Phf6	PHD finger protein 6 [Source:MGI Symbol;Acc:MGI:1918248]	2.07942
Hmgn5	high-mobility group nucleosome binding domain 5 [Source:MGI Symbol;Acc:MGI:1355295]	2.07632
Atp10a	ATPase, class V, type 10A [Source:MGI Symbol;Acc:MGI:1330809]	2.07522
Aifm3	apoptosis-inducing factor, mitochondrion-associated 3 [Source:MGI Symbol;Acc:MGI:1919418]	2.07472
Acer2	alkaline ceramidase 2 [Source:MGI Symbol;Acc:MGI:1920932]	2.07432
Prmt2	protein arginine N-methyltransferase 2 [Source:MGI Symbol;Acc:MGI:1316652]	2.07356
Zbtb37	zinc finger and BTB domain containing 37 [Source:MGI Symbol;Acc:MGI:2444467]	2.07301
Alcam	activated leukocyte cell adhesion molecule [Source:MGI Symbol;Acc:MGI:1313266]	2.07257
Garnl3	GTPase activating RANGAP domain-like 3 [Source:MGI Symbol;Acc:MGI:2139309]	2.07197
Lnx1	FIP1 like 1 (S. cerevisiae) [Source:MGI Symbol;Acc:MGI:1914149]	2.07191
Tfrc	transferrin receptor [Source:MGI Symbol;Acc:MGI:98822]	2.06695
Ccdc126	coiled-coil domain containing 126 [Source:MGI Symbol;Acc:MGI:1889376]	2.06681
Atp1b1	ATPase, Na+/K+ transporting, beta 1 polypeptide [Source:MGI Symbol;Acc:MGI:88108]	2.06661
Col27a1	collagen, type XXVII, alpha 1 [Source:MGI Symbol;Acc:MGI:2672118]	2.06615
D630045J12Rik	ATPase, H+ transporting, lysosomal V0 subunit A4 [Source:MGI Symbol;Acc:MGI:2153480]	2.06488
Aph1b	anterior pharynx defective 1b homolog (C. elegans) [Source:MGI Symbol;Acc:MGI:3522097]	2.0618
Actg1	actin, gamma, cytoplasmic 1 [Source:MGI Symbol;Acc:MGI:87906]	2.06133
Fam102a	family with sequence similarity 102, member A [Source:MGI Symbol;Acc:MGI:2138935]	2.06053
Rims3	regulating synaptic membrane exocytosis 3 [Source:MGI Symbol;Acc:MGI:2443331]	2.0591
Fsd1	fibronectin type 3 and SPRY domain-containing protein [Source:MGI Symbol;Acc:MGI:1934858]	2.05882
D330028D13Rik	RIKEN cDNA D330028D13 gene [Source:MGI Symbol;Acc:MGI:2442161]	2.0552
Wrb	tryptophan rich basic protein [Source:MGI Symbol;Acc:MGI:2136882]	2.05503
Gpr162	G protein-coupled receptor 162 [Source:MGI Symbol;Acc:MGI:1315214]	2.05435
Ryr1	ryanodine receptor 1, skeletal muscle [Source:MGI Symbol;Acc:MGI:99659]	2.0531
4632428N05Rik	cadherin 23 (otocadherin) [Source:MGI Symbol;Acc:MGI:1890219]	2.05069
Hspb8	heat shock protein 8 [Source:MGI Symbol;Acc:MGI:2135756]	2.04725
Ptpn4	protein tyrosine phosphatase, non-receptor type 4 [Source:MGI Symbol;Acc:MGI:1099792]	2.04599
2310030G06Rik	RIKEN cDNA 2310030G06 gene [Source:MGI Symbol;Acc:MGI:1914202]	2.04349
Ap3m2	adaptor-related protein complex 3, mu 2 subunit [Source:MGI Symbol;Acc:MGI:1929214]	2.04296
Gm16039	predicted gene 16039 [Source:MGI Symbol;Acc:MGI:3840148]	2.04266
Phlda2	pleckstrin homology-like domain, family A, member 2 [Source:MGI Symbol;Acc:MGI:1202307]	2.04171
Gtf2e1	general transcription factor II E, polypeptide 1 (alpha subunit) [Source:MGI Symbol;Acc:MGI:1921447]	2.04119
Slc25a24	solute carrier family 25 (mitochondrial carrier, phosphate carrier), member 24 [Source:MGI Symbol;Acc:MGI:1917160]	2.0389
Il3ra	interleukin 3 receptor, alpha chain [Source:MGI Symbol;Acc:MGI:96553]	2.03782
Ube2e1	NFKB inhibitor interacting Ras-like protein 1 [Source:MGI Symbol;Acc:MGI:1916971]	2.03665
Tmem218	transmembrane protein 218 [Source:MGI Symbol;Acc:MGI:1913529]	2.03561
Aak1	AP2 associated kinase 1 [Source:MGI Symbol;Acc:MGI:1098687]	2.03452
Map3k9	mitogen-activated protein kinase kinase kinase 9 [Source:MGI Symbol;Acc:MGI:2449952]	2.03287
2810046L04Rik	RIKEN cDNA 2810046L04 gene [Source:MGI Symbol;Acc:MGI:1919933]	2.02858
8430419L09Rik	RIKEN cDNA 8430419L09 gene [Source:MGI Symbol;Acc:MGI:1921775]	2.02577
Tmem150a	transmembrane protein 150A [Source:MGI Symbol;Acc:MGI:2385244]	2.02359
D6Wsu116e	DNA segment, Chr 6, Wayne State University 116, expressed [Source:MGI Symbol;Acc:MGI:106463]	2.0232
Xylb	solute carrier family 22 (organic cation transporter), member 14 [Source:MGI Symbol;Acc:MGI:2685974]	2.02057
Agphd1	aminoglycoside phosphotransferase domain containing 1 [Source:MGI Symbol;Acc:MGI:2443139]	2.02034
Mtmr4	myotubularin related protein 4 [Source:MGI Symbol;Acc:MGI:2180699]	2.01891
Hspa2	heat shock protein 2 [Source:MGI Symbol;Acc:MGI:96243]	2.01787
Fgd4	FYVE, RhoGEF and PH domain containing 4 [Source:MGI Symbol;Acc:MGI:2183747]	2.0178
Slc16a13	solute carrier family 16 (monocarboxylic acid transporters), member 13 [Source:MGI Symbol;Acc:MGI:1916559]	2.01679
AW146020	expressed sequence AW146020 [Source:MGI Symbol;Acc:MGI:2141656]	2.01379
Tjp3	amyloid beta (A4) precursor protein-binding, family A, member 3 [Source:MGI Symbol;Acc:MGI:1888527]	2.01294
Paqr5	progestin and adipoQ receptor family member V [Source:MGI Symbol;Acc:MGI:1921340]	2.01246
Sfxn5	sideroflexin 5 [Source:MGI Symbol;Acc:MGI:2137681]	2.0121
Zfp248	zinc finger protein 248 [Source:MGI Symbol;Acc:MGI:1919970]	2.01128
Kcnh3	potassium voltage-gated channel, subfamily H (eag-related), member 3 [Source:MGI Symbol;Acc:MGI:1341723]	2.01026
Ccdc132	coiled-coil domain containing 132 [Source:MGI Symbol;Acc:MGI:1920538]	2.00926
Gss	acyl-CoA synthetase short-chain family member 2 [Source:MGI Symbol;Acc:MGI:1890410]	2.00887
Xk	Kell blood group precursor (McLeod phenotype) homolog [Source:MGI Symbol;Acc:MGI:103569]	2.00825
Pdia4	protein disulfide isomerase associated 4 [Source:MGI Symbol;Acc:MGI:104864]	2.00759
Cilp2	cartilage intermediate layer protein 2 [Source:MGI Symbol;Acc:MGI:1915959]	2.00743
Asphd2	aspartate beta-hydroxylase domain containing 2 [Source:MGI Symbol;Acc:MGI:1920148]	2.00726
Alms1	Alstrom syndrome 1 homolog (human) [Source:MGI Symbol;Acc:MGI:1934606]	2.00722
Bhlhe40	RIKEN cDNA 0610040F04 gene [Source:MGI Symbol;Acc:MGI:1922644]	2.00573
Mmp14	matrix metallopeptidase 14 (membrane-inserted) [Source:MGI Symbol;Acc:MGI:101900]	2.00568
Slc23a1	polyadenylate-binding protein-interacting protein 2 [Source:MGI Symbol;Acc:MGI:1915119]	2.00488
Kcnk6	potassium inwardly-rectifying channel, subfamily K, member 6 [Source:MGI Symbol;Acc:MGI:1891291]	2.00146
Tmc8	transmembrane channel-like gene family 6 [Source:MGI Symbol;Acc:MGI:1098686]	2.00093
Gfpt1	glutamine fructose-6-phosphate transaminase 1 [Source:MGI Symbol;Acc:MGI:95698]	2.00017
Vim	vimentin [Source:MGI Symbol;Acc:MGI:98932]	0.510157
Slc12a5	predicted gene 11459 [Source:MGI Symbol;Acc:MGI:3649776]	0.509954
Iqcg	leucine-rich repeats and calponin homology (CH) domain containing 3 [Source:MGI Symbol;Acc:MGI:1917394]	0.509021
Mars	DNA-damage inducible transcript 3 [Source:MGI Symbol;Acc:MGI:109247]	0.508843
Gm11019	predicted gene 11019 [Source:MGI Symbol;Acc:MGI:3779239]	0.506491
Lrrc8b	leucine rich repeat containing 8 family, member B [Source:MGI Symbol;Acc:MGI:2141353]	0.50614
Wars	tryptophanyl-tRNA synthetase [Source:MGI Symbol;Acc:MGI:104630]	0.505646
Gm20499	RIKEN cDNA 1500011B03 gene [Source:MGI Symbol;Acc:MGI:1913486]	0.504952
Sil1	endoplasmic reticulum chaperone SIL1 homolog (S. cerevisiae) [Source:MGI Symbol;Acc:MGI:1932040]	0.504265
Prx	periaxin [Source:MGI Symbol;Acc:MGI:108176]	0.503238
9230111E07Rik	predicted gene 14321 [Source:MGI Symbol;Acc:MGI:3701951]	0.502696
Chn1	predicted gene 13704 [Source:MGI Symbol;Acc:MGI:3705094]	0.502291
Rpl21	ribosomal protein L21 [Source:MGI Symbol;Acc:MGI:1278340]	0.502137
Serpinh1	serine (or cysteine) peptidase inhibitor, clade H, member 1 [Source:MGI Symbol;Acc:MGI:88283]	0.502034
Kdr	kinase insert domain protein receptor [Source:MGI Symbol;Acc:MGI:96683]	0.501878
9330020H09Rik	cyclin T1 [Source:MGI Symbol;Acc:MGI:1328363]	0.501667
5031425E22Rik	RIKEN cDNA 5031425E22 gene [Source:MGI Symbol;Acc:MGI:1923227]	0.501537
Pax6	Pax6 opposite strand transcript 1 [Source:MGI Symbol;Acc:MGI:3028033]	0.501328
Cluap1	predicted gene 20695 [Source:MGI Symbol;Acc:MGI:5313142]	0.501247
Kbtbd13	kelch repeat and BTB (POZ) domain containing 13 [Source:MGI Symbol;Acc:MGI:1921742]	0.500599
Dzip3	DAZ interacting protein 3, zinc finger [Source:MGI Symbol;Acc:MGI:1917433]	0.500454
Cxx1b	CAAX box 1 homolog B (human) [Source:MGI Symbol;Acc:MGI:3576504]	0.499956
Rbp4	retinol binding protein 4, plasma [Source:MGI Symbol;Acc:MGI:97879]	0.499789
Snx24	sorting nexing 24 [Source:MGI Symbol;Acc:MGI:1916476]	0.499127
Akap7	A kinase (PRKA) anchor protein 7 [Source:MGI Symbol;Acc:MGI:1859150]	0.498555
Zfhx3	zinc finger homeobox 3 [Source:MGI Symbol;Acc:MGI:99948]	0.498012
Pdx1	RIKEN cDNA 2210019I11 gene [Source:MGI Symbol;Acc:MGI:1917397]	0.497775
Naaladl1	N-acetylated alpha-linked acidic dipeptidase-like 1 [Source:MGI Symbol;Acc:MGI:2685810]	0.497746
Ng23	DNA segment, Chr 17, human D6S56E 3 [Source:MGI Symbol;Acc:MGI:1306798]	0.49773
Mylpf	myosin light chain, phosphorylatable, fast skeletal muscle [Source:MGI Symbol;Acc:MGI:97273]	0.497671
Cd302	CD302 antigen [Source:MGI Symbol;Acc:MGI:1913455]	0.497635
Btbd1	BTB (POZ) domain containing 1 [Source:MGI Symbol;Acc:MGI:1933765]	0.497543
Prex2	No description	0.497504
B930041F14Rik	RIKEN cDNA B930041F14 gene [Source:MGI Symbol;Acc:MGI:2444790]	0.497343
C230037L18Rik	arylsulfatase A [Source:MGI Symbol;Acc:MGI:88077]	0.497315
4933403G14Rik	RIKEN cDNA 4933403G14 gene [Source:MGI Symbol;Acc:MGI:1921643]	0.496957
2006-03-01	membrane-associated ring finger (C3HC4) 6 [Source:MGI Symbol;Acc:MGI:2442773]	0.495785
Sec1	secretory blood group 1 [Source:MGI Symbol;Acc:MGI:1928893]	0.495206
Ears2	glutamyl-tRNA synthetase 2 (mitochondrial)(putative) [Source:MGI Symbol;Acc:MGI:1914667]	0.493727
BC025920	cDNA sequence BC025920 [Source:MGI Symbol;Acc:MGI:2670983]	0.493406
Gnal	guanine nucleotide binding protein, alpha stimulating, olfactory type [Source:MGI Symbol;Acc:MGI:95774]	0.492391
Taok3	TAO kinase 3 [Source:MGI Symbol;Acc:MGI:3041177]	0.492107
Mei4	meiosis-specific, MEI4 homolog (S. cerevisiae) [Source:MGI Symbol;Acc:MGI:1922283]	0.490886
Gfra4	glial cell line derived neurotrophic factor family receptor alpha 4 [Source:MGI Symbol;Acc:MGI:1341873]	0.490701
2700007P21Rik	RIKEN cDNA 2700007P21 gene [Source:MGI Symbol;Acc:MGI:1926020]	0.490418
Peg3	paternally expressed 3 [Source:MGI Symbol;Acc:MGI:104748]	0.490133
Mt2	metallothionein 2 [Source:MGI Symbol;Acc:MGI:97172]	0.489541
4933439C10Rik	zinc finger with KRAB and SCAN domains 17 [Source:MGI Symbol;Acc:MGI:2679270]	0.489484
Prickle3	prickle homolog 3 (Drosophila) [Source:MGI Symbol;Acc:MGI:1859635]	0.48942
Zbed3	zinc finger, BED domain containing 3 [Source:MGI Symbol;Acc:MGI:1919364]	0.488968
Nrarp	Notch-regulated ankyrin repeat protein [Source:MGI Symbol;Acc:MGI:1914372]	0.488112
Shmt2	NADH dehydrogenase (ubiquinone) 1 alpha subcomplex, 4-like 2 [Source:MGI Symbol;Acc:MGI:3039567]	0.488032
Ssbp2	single-stranded DNA binding protein 2 [Source:MGI Symbol;Acc:MGI:1914220]	0.486796
Ren1	renin 1 structural [Source:MGI Symbol;Acc:MGI:97898]	0.485906
Gbas	glioblastoma amplified sequence [Source:MGI Symbol;Acc:MGI:1278343]	0.48509
Akr1e1	aldo-keto reductase family 1, member E1 [Source:MGI Symbol;Acc:MGI:1914758]	0.484473
Ufsp1	UFM1-specific peptidase 1 [Source:MGI Symbol;Acc:MGI:1917490]	0.483774
AC151712.4	erythroid differentiation regulator 1 [Source:RefSeq peptide;Acc:NP_579940]	0.483031
Bend6	BEN domain containing 6 [Source:MGI Symbol;Acc:MGI:2444572]	0.482571
Cd40	CD40 antigen [Source:MGI Symbol;Acc:MGI:88336]	0.482213
F730043M19Rik	RIKEN cDNA F730043M19 gene [Source:MGI Symbol;Acc:MGI:2443237]	0.481475
Mogat2	monoacylglycerol O-acyltransferase 2 [Source:MGI Symbol;Acc:MGI:2663253]	0.481251
Cplx2	complexin 2 [Source:MGI Symbol;Acc:MGI:104726]	0.480922
Gas2	Fanconi anemia, complementation group F [Source:MGI Symbol;Acc:MGI:3689889]	0.479754
AU015836	expressed sequence AU015836 [Source:MGI Symbol;Acc:MGI:2147954]	0.479124
Susd5	sushi domain containing 5 [Source:MGI Symbol;Acc:MGI:2685972]	0.478937
Calr3	calreticulin 3 [Source:MGI Symbol;Acc:MGI:1920566]	0.478563
Gm9843	predicted gene 9843 [Source:MGI Symbol;Acc:MGI:3708621]	0.478506
H2afx	H2A histone family, member X [Source:MGI Symbol;Acc:MGI:102688]	0.477235
Samd5	sterile alpha motif domain containing 5 [Source:MGI Symbol;Acc:MGI:2444815]	0.476587
Slfn5	RIKEN cDNA 1700003F17 gene [Source:MGI Symbol;Acc:MGI:1923642]	0.475984
Hist1h1c	histone cluster 1, H1c [Source:MGI Symbol;Acc:MGI:1931526]	0.475839
Nid2	nidogen 2 [Source:MGI Symbol;Acc:MGI:1298229]	0.475051
Xrcc4	predicted gene 4117 [Source:MGI Symbol;Acc:MGI:3782293]	0.474574
2810008D09Rik	RIKEN cDNA 2810008D09 gene [Source:MGI Symbol;Acc:MGI:1924222]	0.473482
Btnl7	butyrophilin-like 7 [Source:MGI Symbol;Acc:MGI:2388054]	0.47307
Lrrc8d	leucine rich repeat containing 8D [Source:MGI Symbol;Acc:MGI:1922368]	0.472652
Bsn	bassoon [Source:MGI Symbol;Acc:MGI:1277955]	0.472346
Otub2	OTU domain, ubiquitin aldehyde binding 2 [Source:MGI Symbol;Acc:MGI:1915399]	0.472184
Zfp629	zinc finger protein 629 [Source:MGI Symbol;Acc:MGI:2444524]	0.471927
Zeb1	predicted gene 10125 [Source:MGI Symbol;Acc:MGI:3642044]	0.471439
Glipr2	GLI pathogenesis-related 2 [Source:MGI Symbol;Acc:MGI:1917770]	0.470787
Tmem136	transmembrane protein 136 [Source:MGI Symbol;Acc:MGI:2685030]	0.47043
Mtap1a	microtubule-associated protein 1 A [Source:MGI Symbol;Acc:MGI:1306776]	0.469807
8430427H17Rik	RIKEN cDNA 8430427H17 gene [Source:MGI Symbol;Acc:MGI:1918765]	0.469019
Iars	isoleucine-tRNA synthetase [Source:MGI Symbol;Acc:MGI:2145219]	0.468907
Tmem181b-ps	predicted gene 2792 [Source:MGI Symbol;Acc:MGI:3780960]	0.468812
Mtbp	mitochondrial ribosomal protein L13 [Source:MGI Symbol;Acc:MGI:2137218]	0.468556
Tmem2	transmembrane protein 2 [Source:MGI Symbol;Acc:MGI:1890373]	0.467514
Gm9776	predicted gene 9776 [Source:MGI Symbol;Acc:MGI:3641792]	0.467027
Phf10	RIKEN cDNA 1600012H06 gene [Source:MGI Symbol;Acc:MGI:1915162]	0.466509
Sycp1	synaptonemal complex protein 1 [Source:MGI Symbol;Acc:MGI:105931]	0.466468
Dnhd1	fractured callus expressed transcript 1 [Source:MGI Symbol;Acc:MGI:1315196]	0.465152
Ripk3	receptor-interacting serine-threonine kinase 3 [Source:MGI Symbol;Acc:MGI:2154952]	0.464341
Iah1	isoamyl acetate-hydrolyzing esterase 1 homolog (S. cerevisiae) [Source:MGI Symbol;Acc:MGI:1914982]	0.46255
Ppap2b	phosphatidic acid phosphatase type 2B [Source:MGI Symbol;Acc:MGI:1915166]	0.46231
Rnf125	ring finger protein 125 [Source:MGI Symbol;Acc:MGI:1914914]	0.462231
2200002D01Rik	Yip1 interacting factor homolog B (S. cerevisiae) [Source:MGI Symbol;Acc:MGI:1924504]	0.461848
Cebpg	CCAAT/enhancer binding protein (C/EBP), gamma [Source:MGI Symbol;Acc:MGI:104982]	0.461134
1500012F01Rik	zinc finger, NFX1-type containing 1 [Source:MGI Symbol;Acc:MGI:2138982]	0.459112
2610524H06Rik	predicted gene 20499 [Source:MGI Symbol;Acc:MGI:5141964]	0.458368
Entpd3	ectonucleoside triphosphate diphosphohydrolase 3 [Source:MGI Symbol;Acc:MGI:1321386]	0.456335
Zfp945	zinc finger protein 945 [Source:MGI Symbol;Acc:MGI:2445132]	0.455369
Rin2	Ras and Rab interactor 2 [Source:MGI Symbol;Acc:MGI:1921280]	0.455001
Shank1	SH3/ankyrin domain gene 1 [Source:MGI Symbol;Acc:MGI:3613677]	0.454338
Gm7536	predicted gene 7536 [Source:MGI Symbol;Acc:MGI:3645137]	0.45345
Rnaset2b	ribonuclease T2B [Source:MGI Symbol;Acc:MGI:3702087]	0.451302
Sox4	SRY-box containing gene 4 [Source:MGI Symbol;Acc:MGI:98366]	0.451078
Maml1	mastermind like 1 (Drosophila) [Source:MGI Symbol;Acc:MGI:1890504]	0.450288
2410006H16Rik	RIKEN cDNA 2410006H16 gene [Source:MGI Symbol;Acc:MGI:1916471]	0.449125
Cdh22	cadherin 22 [Source:MGI Symbol;Acc:MGI:1341843]	0.448877
Rhbdd1	rhomboid domain containing 1 [Source:MGI Symbol;Acc:MGI:1924117]	0.448346
Ctsa	neuralized-like 2 (Drosophila) [Source:MGI Symbol;Acc:MGI:3043305]	0.445462
D330045A20Rik	RIKEN cDNA D330045A20 gene [Source:MGI Symbol;Acc:MGI:2147848]	0.445022
Brdt	bromodomain, testis-specific [Source:MGI Symbol;Acc:MGI:1891374]	0.444683
Aim2	cell adhesion molecule 3 [Source:MGI Symbol;Acc:MGI:2137858]	0.443265
Serpinb1a	serine (or cysteine) peptidase inhibitor, clade B, member 1a [Source:MGI Symbol;Acc:MGI:1913472]	0.443071
Nanos1	nanos homolog 1 (Drosophila) [Source:MGI Symbol;Acc:MGI:2669254]	0.441941
Elac1	elaC homolog 1 (E. coli) [Source:MGI Symbol;Acc:MGI:1890495]	0.441531
Gm10175	predicted gene 10175 [Source:MGI Symbol;Acc:MGI:3704287]	0.441449
Crym	crystallin, mu [Source:MGI Symbol;Acc:MGI:102675]	0.440932
Gm1673	predicted gene 1673 [Source:MGI Symbol;Acc:MGI:2686519]	0.440568
Kif21b	kinesin family member 21B [Source:MGI Symbol;Acc:MGI:109234]	0.440513
Cdh4	cadherin 4 [Source:MGI Symbol;Acc:MGI:99218]	0.439088
Eid2b	EP300 interacting inhibitor of differentiation 2B [Source:MGI Symbol;Acc:MGI:1924095]	0.438907
Zfp532	zinc finger protein 532 [Source:MGI Symbol;Acc:MGI:3036282]	0.438714
Ubash3a	ubiquitin associated and SH3 domain containing, A [Source:MGI Symbol;Acc:MGI:1926074]	0.438678
Macf1	microtubule-actin crosslinking factor 1 [Source:MGI Symbol;Acc:MGI:108559]	0.438484
Fxc1	ADP-ribosylation factor interacting protein 2 [Source:MGI Symbol;Acc:MGI:1924182]	0.437459
Ctla2b	cytotoxic T lymphocyte-associated protein 2 beta [Source:MGI Symbol;Acc:MGI:88555]	0.435578
Lclat1	lysocardiolipin acyltransferase 1 [Source:MGI Symbol;Acc:MGI:2684937]	0.433659
Zfp760	zinc finger protein 760 [Source:MGI Symbol;Acc:MGI:2679257]	0.432502
Olfm2	olfactomedin 2 [Source:MGI Symbol;Acc:MGI:3045350]	0.432256
Slc16a9	solute carrier family 16 (monocarboxylic acid transporters), member 9 [Source:MGI Symbol;Acc:MGI:1914109]	0.431877
1700029J07Rik	RIKEN cDNA 1700029J07 gene [Source:MGI Symbol;Acc:MGI:1916729]	0.431698
Stag3	stromal antigen 3 [Source:MGI Symbol;Acc:MGI:1355311]	0.428814
Lrrc9	leucine rich repeat containing 9 [Source:MGI Symbol;Acc:MGI:1925507]	0.427852
Dhrs3	dehydrogenase/reductase (SDR family) member 3 [Source:MGI Symbol;Acc:MGI:1315215]	0.426968
Ikbke	inhibitor of kappaB kinase epsilon [Source:MGI Symbol;Acc:MGI:1929612]	0.426725
Gpr179	G protein-coupled receptor 179 [Source:MGI Symbol;Acc:MGI:2443409]	0.426518
Krt20	keratin 20 [Source:MGI Symbol;Acc:MGI:1914059]	0.423531
2410004N09Rik	RIKEN cDNA 2410004N09 gene [Source:MGI Symbol;Acc:MGI:1916999]	0.422843
B930095G15Rik	FERM, RhoGEF (Arhgef) and pleckstrin domain protein 1 (chondrocyte-derived) [Source:MGI Symbol;Acc:MGI:2446173]	0.42271
Anxa3	annexin A3 [Source:MGI Symbol;Acc:MGI:1201378]	0.420042
Rnf157	ring finger protein 157 [Source:MGI Symbol;Acc:MGI:2442484]	0.41974
Rufy3	RUN and FYVE domain containing 3 [Source:MGI Symbol;Acc:MGI:106484]	0.419666
Rnaset2a	ribonuclease T2A [Source:MGI Symbol;Acc:MGI:1915445]	0.419113
Slc20a2	expressed sequence AI316807 [Source:MGI Symbol;Acc:MGI:2142501]	0.418259
Cyba	predicted gene 20388 [Source:MGI Symbol;Acc:MGI:5141853]	0.41807
Bmp2k	BMP2 inducible kinase [Source:MGI Symbol;Acc:MGI:2155456]	0.417537
Fermt1	fermitin family homolog 1 (Drosophila) [Source:MGI Symbol;Acc:MGI:2443583]	0.417147
Cpm	carboxypeptidase M [Source:MGI Symbol;Acc:MGI:1917824]	0.415628
Efnb2	ephrin B2 [Source:MGI Symbol;Acc:MGI:105097]	0.415557
Pcbd2	pterin 4 alpha carbinolamine dehydratase/dimerization cofactor of hepatocyte nuclear factor 1 alpha (TCF1) 2 [Source:MGI Symbol;Acc:MGI:1919812]	0.413191
Itga1	integrin alpha 1 [Source:MGI Symbol;Acc:MGI:96599]	0.412374
D730003I15Rik	RIKEN cDNA D730003I15 gene [Source:MGI Symbol;Acc:MGI:1925971]	0.411317
Lpar6	retinoblastoma 1 [Source:MGI Symbol;Acc:MGI:97874]	0.409848
Ly6c1	lymphocyte antigen 6 complex, locus C1 [Source:MGI Symbol;Acc:MGI:96882]	0.409471
Lmo1	LIM domain only 1 [Source:MGI Symbol;Acc:MGI:102812]	0.408629
Slc7a7	oxidase assembly 1-like [Source:MGI Symbol;Acc:MGI:1916339]	0.408573
Armcx4	armadillo repeat containing, X-linked 4 [Source:MGI Symbol;Acc:MGI:2147887]	0.408348
Cd38	CD38 antigen [Source:MGI Symbol;Acc:MGI:107474]	0.407957
Steap2	six transmembrane epithelial antigen of prostate 2 [Source:MGI Symbol;Acc:MGI:1921301]	0.405891
H19	H19 fetal liver mRNA [Source:MGI Symbol;Acc:MGI:95891]	0.404341
Adad2	adenosine deaminase domain containing 2 [Source:MGI Symbol;Acc:MGI:1923023]	0.40405
Slc17a9	solute carrier family 17, member 9 [Source:MGI Symbol;Acc:MGI:1919107]	0.403844
Lars	leucyl-tRNA synthetase [Source:MGI Symbol;Acc:MGI:1913808]	0.403803
Atf4	activating transcription factor 4 [Source:MGI Symbol;Acc:MGI:88096]	0.403424
Cldn9	claudin 9 [Source:MGI Symbol;Acc:MGI:1913100]	0.400913
Mt1	metallothionein 1 [Source:MGI Symbol;Acc:MGI:97171]	0.400789
Susd1	sushi domain containing 1 [Source:MGI Symbol;Acc:MGI:3651543]	0.400573
Sars	seryl-aminoacyl-tRNA synthetase [Source:MGI Symbol;Acc:MGI:102809]	0.400055
Fam159a	family with sequence similarity 159, member A [Source:MGI Symbol;Acc:MGI:3651644]	0.398176
Ube2l6	ubiquitin-conjugating enzyme E2L 6 [Source:MGI Symbol;Acc:MGI:1914500]	0.395637
E130307A14Rik	TRAF3 interacting protein 2 [Source:MGI Symbol;Acc:MGI:2143599]	0.393546
Ssbp4	single stranded DNA binding protein 4 [Source:MGI Symbol;Acc:MGI:1924150]	0.393184
4930452B06Rik	RIKEN cDNA 4930452B06 gene [Source:MGI Symbol;Acc:MGI:1926154]	0.393169
Gm10159	predicted pseudogene 10159 [Source:MGI Symbol;Acc:MGI:3704295]	0.392847
Gm14418	predicted gene 14418 [Source:MGI Symbol;Acc:MGI:3702408]	0.391376
Pik3ip1	predicted gene 12592 [Source:MGI Symbol;Acc:MGI:3649892]	0.391209
Pfkp	pitrilysin metallepetidase 1 [Source:MGI Symbol;Acc:MGI:1916867]	0.391068
Gm11808	predicted gene 11808 [Source:MGI Symbol;Acc:MGI:3649356]	0.390645
B230217C12Rik	RIKEN cDNA B230217C12 gene [Source:MGI Symbol;Acc:MGI:1915377]	0.390448
Hsf2bp	heat shock transcription factor 2 binding protein [Source:MGI Symbol;Acc:MGI:1921627]	0.390119
Aldh18a1	aldehyde dehydrogenase 18 family, member A1 [Source:MGI Symbol;Acc:MGI:1888908]	0.389761
Adora1	myosin binding protein H [Source:MGI Symbol;Acc:MGI:1858196]	0.389421
Uncx	UNC homeobox [Source:MGI Symbol;Acc:MGI:108013]	0.389404
Tdrkh	tudor and KH domain containing protein [Source:MGI Symbol;Acc:MGI:1919884]	0.388516
Ppef2	protein phosphatase, EF hand calcium-binding domain 2 [Source:MGI Symbol;Acc:MGI:1342304]	0.387979
Exoc6	exocyst complex component 6 [Source:MGI Symbol;Acc:MGI:1351611]	0.386316
Id1	inhibitor of DNA binding 1 [Source:MGI Symbol;Acc:MGI:96396]	0.385583
Slc38a4	solute carrier family 38, member 4 [Source:MGI Symbol;Acc:MGI:1916604]	0.383783
D430041D05Rik	RIKEN cDNA D430041D05 gene [Source:MGI Symbol;Acc:MGI:2181743]	0.383755
Mthfd2	methylenetetrahydrofolate dehydrogenase (NAD+ dependent), methenyltetrahydrofolate cyclohydrolase [Source:MGI Symbol;Acc:MGI:1338850]	0.381579
Mmp28	RIKEN cDNA 1700020L24 gene [Source:MGI Symbol;Acc:MGI:1913580]	0.381555
Ildr1	immunoglobulin-like domain containing receptor 1 [Source:MGI Symbol;Acc:MGI:2146574]	0.379379
AI316807	expressed sequence AI316807 [Source:MGI Symbol;Acc:MGI:2142501]	0.379309
Magi2	membrane associated guanylate kinase, WW and PDZ domain containing 2 [Source:MGI Symbol;Acc:MGI:1354953]	0.377015
Anxa8	uncharacterized protein LOC105518 [Source:RefSeq peptide;Acc:NP_001238772]	0.377
Psat1	phosphoserine aminotransferase 1 [Source:MGI Symbol;Acc:MGI:2183441]	0.37616
Herpud1	predicted gene 15890 [Source:MGI Symbol;Acc:MGI:3802160]	0.374799
Rad9b	PTC7 protein phosphatase homolog (S. cerevisiae) [Source:MGI Symbol;Acc:MGI:2444593]	0.374521
Cd59a	CD59a antigen [Source:MGI Symbol;Acc:MGI:109177]	0.373004
Jak3	predicted gene 9933 [Source:MGI Symbol;Acc:MGI:3641937]	0.371601
Gpr124	G protein-coupled receptor 124 [Source:MGI Symbol;Acc:MGI:1925810]	0.370585
Slc7a5	predicted gene 20388 [Source:MGI Symbol;Acc:MGI:5141853]	0.370117
C330018A13Rik	RIKEN cDNA C330018A13 gene [Source:MGI Symbol;Acc:MGI:2444781]	0.366307
Rnft2	ring finger protein, transmembrane 2 [Source:MGI Symbol;Acc:MGI:2442859]	0.36584
Gpt2	glutamic pyruvate transaminase (alanine aminotransferase) 2 [Source:MGI Symbol;Acc:MGI:1915391]	0.365515
Slc3a2	solute carrier family 3 (activators of dibasic and neutral amino acid transport), member 2 [Source:MGI Symbol;Acc:MGI:96955]	0.363409
Dusp27	dual specificity phosphatase 27 (putative) [Source:MGI Symbol;Acc:MGI:2685055]	0.362726
Katnal1	katanin p60 subunit A-like 1 [Source:MGI Symbol;Acc:MGI:2387638]	0.359009
Insl3	Janus kinase 3 [Source:MGI Symbol;Acc:MGI:99928]	0.358905
Tmem98	transmembrane protein 98 [Source:MGI Symbol;Acc:MGI:1923457]	0.35858
Sh3bgrl	SH3-binding domain glutamic acid-rich protein like [Source:MGI Symbol;Acc:MGI:1930849]	0.358444
Sft2d3	SFT2 domain containing 3 [Source:MGI Symbol;Acc:MGI:1914408]	0.358181
Asns	asparagine synthetase [Source:MGI Symbol;Acc:MGI:1350929]	0.357395
Dynlt1b	predicted gene 2792 [Source:MGI Symbol;Acc:MGI:3780960]	0.356947
Cars	cysteinyl-tRNA synthetase [Source:MGI Symbol;Acc:MGI:1351477]	0.356265
Ddit3	predicted gene 4189 [Source:MGI Symbol;Acc:MGI:3782365]	0.354735
Aldh1l2	aldehyde dehydrogenase 1 family, member L2 [Source:MGI Symbol;Acc:MGI:2444680]	0.353777
Fbp2	fructose bisphosphatase 2 [Source:MGI Symbol;Acc:MGI:95491]	0.352179
Rps6ka2	ribosomal protein S6 kinase, polypeptide 2 [Source:MGI Symbol;Acc:MGI:1342290]	0.349807
Tspyl4	5'-nucleotidase domain containing 1 [Source:MGI Symbol;Acc:MGI:2442446]	0.346096
Nhlrc1	NHL repeat containing 1 [Source:MGI Symbol;Acc:MGI:2145264]	0.343153
Cyp26a1	cytochrome P450, family 26, subfamily a, polypeptide 1 [Source:MGI Symbol;Acc:MGI:1096359]	0.342227
Adam23	a disintegrin and metallopeptidase domain 23 [Source:MGI Symbol;Acc:MGI:1345162]	0.340908
2500004C02Rik	RIKEN cDNA 2500004C02 gene [Source:MGI Symbol;Acc:MGI:1919576]	0.33968
Apobec3	apolipoprotein B mRNA editing enzyme, catalytic polypeptide 3 [Source:MGI Symbol;Acc:MGI:1933111]	0.338312
Crhbp	corticotropin releasing hormone binding protein [Source:MGI Symbol;Acc:MGI:88497]	0.337653
Tcf15	transcription factor 15 [Source:MGI Symbol;Acc:MGI:104664]	0.335717
Hexa	hexosaminidase A [Source:MGI Symbol;Acc:MGI:96073]	0.335468
Zfp850	zinc finger protein 850 [Source:MGI Symbol;Acc:MGI:3036281]	0.335197
Bglap-rs1	bone gamma-carboxyglutamate protein, related sequence 1 [Source:MGI Symbol;Acc:MGI:88155]	0.332484
Mkrn3	makorin, ring finger protein, 3 [Source:MGI Symbol;Acc:MGI:2181178]	0.331729
Coro6	coronin 6 [Source:MGI Symbol;Acc:MGI:2183448]	0.329487
Prss46	protease, serine, 46 [Source:MGI Symbol;Acc:MGI:1921556]	0.329446
Ctsc	cathepsin C [Source:MGI Symbol;Acc:MGI:109553]	0.327814
T	brachyury [Source:MGI Symbol;Acc:MGI:98472]	0.327636
Armc2	armadillo repeat containing 2 [Source:MGI Symbol;Acc:MGI:1916449]	0.326894
Zic3	zinc finger protein of the cerebellum 3 [Source:MGI Symbol;Acc:MGI:106676]	0.326178
Hsd17b14	hydroxysteroid (17-beta) dehydrogenase 14 [Source:MGI Symbol;Acc:MGI:1913315]	0.322816
Rims2	regulating synaptic membrane exocytosis 2 [Source:MGI Symbol;Acc:MGI:2152972]	0.322343
Rgnef	Rho-guanine nucleotide exchange factor [Source:MGI Symbol;Acc:MGI:1346016]	0.321771
2210019I11Rik	RIKEN cDNA 2210019I11 gene [Source:MGI Symbol;Acc:MGI:1917397]	0.321282
Dlgap1	discs, large (Drosophila) homolog-associated protein 1 [Source:MGI Symbol;Acc:MGI:1346065]	0.319961
Gm20621	predicted gene 20621 [Source:MGI Symbol;Acc:MGI:5313068]	0.31982
Dpep3	dipeptidase 3 [Source:MGI Symbol;Acc:MGI:1919104]	0.317346
Pitpnc1	phosphatidylinositol transfer protein, cytoplasmic 1 [Source:MGI Symbol;Acc:MGI:1919045]	0.31635
Sema3g	sema domain, immunoglobulin domain (Ig), short basic domain, secreted, (semaphorin) 3G [Source:MGI Symbol;Acc:MGI:3041242]	0.315909
Cntd1	coiled-coil domain containing 56 [Source:MGI Symbol;Acc:MGI:1098757]	0.314972
Gipc3	GIPC PDZ domain containing family, member 3 [Source:MGI Symbol;Acc:MGI:2387006]	0.311046
Slc7a1	solute carrier family 7 (cationic amino acid transporter, y+ system), member 1 [Source:MGI Symbol;Acc:MGI:88117]	0.309506
Alk	anaplastic lymphoma kinase [Source:MGI Symbol;Acc:MGI:103305]	0.307201
Hist2h2be	histone cluster 2, H2be [Source:MGI Symbol;Acc:MGI:2448415]	0.306549
Nars	asparaginyl-tRNA synthetase [Source:MGI Symbol;Acc:MGI:1917473]	0.30629
Rpl10-ps3	ribosomal protein L20, pseudogene 3 [Source:MGI Symbol;Acc:MGI:3704336]	0.30412
Gm10664	tripartite motif-containing 60 [Source:MGI Symbol;Acc:MGI:2387430]	0.302867
Slc1a4	solute carrier family 1 (glutamate/neutral amino acid transporter), member 4 [Source:MGI Symbol;Acc:MGI:2135601]	0.302706
Gm10800	predicted gene 10800 [Source:MGI Symbol;Acc:MGI:3641657]	0.301481
Slc7a3	solute carrier family 7 (cationic amino acid transporter, y+ system), member 3 [Source:MGI Symbol;Acc:MGI:1100521]	0.299533
1700001C19Rik	RIKEN cDNA 1700001C19 gene [Source:MGI Symbol;Acc:MGI:1922712]	0.297316
Nefm	neurofilament, medium polypeptide [Source:MGI Symbol;Acc:MGI:97314]	0.296213
Prss42	protease, serine, 42 [Source:MGI Symbol;Acc:MGI:2665280]	0.29534
Zhx2	zinc fingers and homeoboxes 2 [Source:MGI Symbol;Acc:MGI:2683087]	0.295222
Gm5045	predicted gene 5045 [Source:MGI Symbol;Acc:MGI:3647181]	0.295043
A930024E05Rik	lysine (K)-specific demethylase 2B [Source:MGI Symbol;Acc:MGI:1354737]	0.293734
2810442I21Rik	RIKEN cDNA 2810442I21 gene [Source:MGI Symbol;Acc:MGI:1919985]	0.293006
N4bp2l1	NEDD4 binding protein 2-like 1 [Source:MGI Symbol;Acc:MGI:2140872]	0.289533
Tesc	tescalcin [Source:MGI Symbol;Acc:MGI:1930803]	0.288752
Dclk1	doublecortin-like kinase 1 [Source:MGI Symbol;Acc:MGI:1330861]	0.288045
Vmn1r90	vomeronasal 1 receptor 90 [Source:MGI Symbol;Acc:MGI:3612342]	0.287062
A330050F15Rik	RIKEN cDNA A330050F15 gene [Source:MGI Symbol;Acc:MGI:2444600]	0.28676
Lrrc51	leucine rich repeat containing 51 [Source:MGI Symbol;Acc:MGI:1916608]	0.286414
Gm14074	predicted gene 14074 [Source:MGI Symbol;Acc:MGI:3651129]	0.285738
Coro2b	coronin, actin binding protein, 2B [Source:MGI Symbol;Acc:MGI:2444283]	0.285069
2410019O14Rik	RIKEN cDNA 2410019O14 gene [Source:MGI Symbol;Acc:MGI:1925566]	0.283716
Pck2	phosphoenolpyruvate carboxykinase 2 (mitochondrial) [Source:MGI Symbol;Acc:MGI:1860456]	0.281888
Fam111a	family with sequence similarity 111, member A [Source:MGI Symbol;Acc:MGI:1915508]	0.279586
Pycr1	pyrroline-5-carboxylate reductase 1 [Source:MGI Symbol;Acc:MGI:2384795]	0.27601
Ifitm2	interferon induced transmembrane protein 2 [Source:MGI Symbol;Acc:MGI:1933382]	0.275475
Gm6807	beta-transducin repeat containing protein [Source:MGI Symbol;Acc:MGI:1338871]	0.274394
Cd6	CD6 antigen [Source:MGI Symbol;Acc:MGI:103566]	0.274202
Psph	phosphoserine phosphatase [Source:MGI Symbol;Acc:MGI:97788]	0.271135
Dnajb4	DnaJ (Hsp40) homolog, subfamily B, member 4 [Source:MGI Symbol;Acc:MGI:1914285]	0.269588
Ly6a	lymphocyte antigen 6 complex, locus A [Source:MGI Symbol;Acc:MGI:107527]	0.269243
AI481877	expressed sequence AI481877 [Source:MGI Symbol;Acc:MGI:2140313]	0.269105
Vldlr	very low density lipoprotein receptor [Source:MGI Symbol;Acc:MGI:98935]	0.26384
Cnga3	cyclic nucleotide gated channel alpha 3 [Source:MGI Symbol;Acc:MGI:1341818]	0.262832
4930529M08Rik	Crn, crooked neck-like 1 (Drosophila) [Source:MGI Symbol;Acc:MGI:1914127]	0.260533
Ttc39c	tetratricopeptide repeat domain 39C [Source:MGI Symbol;Acc:MGI:1919997]	0.25863
Rnf165	ring finger protein 165 [Source:MGI Symbol;Acc:MGI:2444521]	0.258053
Gm9828	basic transcription factor 3 [Source:MGI Symbol;Acc:MGI:1202875]	0.257662
Dleu7	deleted in lymphocytic leukemia, 7 [Source:MGI Symbol;Acc:MGI:2447771]	0.253716
Slc2a7	solute carrier family 2 (facilitated glucose transporter), member 7 [Source:MGI Symbol;Acc:MGI:3650865]	0.250916
Fam13c	family with sequence similarity 13, member C [Source:MGI Symbol;Acc:MGI:1918971]	0.248412
Dmc1	DMC1 dosage suppressor of mck1 homolog, meiosis-specific homologous recombination (yeast) [Source:MGI Symbol;Acc:MGI:105393]	0.244939
Htra3	HtrA serine peptidase 3 [Source:MGI Symbol;Acc:MGI:1925808]	0.241248
Gm9732	predicted gene 9732 [Source:MGI Symbol;Acc:MGI:3796514]	0.240697
Hoxa7	RIKEN cDNA 2700086A05 gene [Source:MGI Symbol;Acc:MGI:1919878]	0.240165
B130034C11Rik	RIKEN cDNA B130034C11 gene [Source:MGI Symbol;Acc:MGI:3041186]	0.237784
Armcx3	armadillo repeat containing, X-linked 3 [Source:MGI Symbol;Acc:MGI:1918953]	0.235407
Dnahc8	dynein, axonemal, heavy chain 8 [Source:MGI Symbol;Acc:MGI:107714]	0.235394
Gm13227	predicted gene 13227 [Source:MGI Symbol;Acc:MGI:3651931]	0.233883
Hist3h2a	tripartite motif-containing 17 [Source:MGI Symbol;Acc:MGI:1861440]	0.23251
Grap	GRB2-related adaptor protein [Source:MGI Symbol;Acc:MGI:1918770]	0.232076
Hsd17b1	hydroxysteroid (17-beta) dehydrogenase 1 [Source:MGI Symbol;Acc:MGI:105077]	0.231222
Slc6a9	solute carrier family 6 (neurotransmitter transporter, glycine), member 9 [Source:MGI Symbol;Acc:MGI:95760]	0.229522
Grm6	glutamate receptor, metabotropic 6 [Source:MGI Symbol;Acc:MGI:1351343]	0.224908
Angpt2	microcephaly, primary autosomal recessive 1 [Source:MGI Symbol;Acc:MGI:2443308]	0.221509
Cd177	CD177 antigen [Source:MGI Symbol;Acc:MGI:1916141]	0.21421
Saa3	serum amyloid A 3 [Source:MGI Symbol;Acc:MGI:98223]	0.214026
Cd37	TEA domain family member 2 [Source:MGI Symbol;Acc:MGI:104904]	0.207663
Hrk	harakiri, BCL2 interacting protein (contains only BH3 domain) [Source:MGI Symbol;Acc:MGI:1201608]	0.206833
Hoxa11	homeobox A11 [Source:MGI Symbol;Acc:MGI:96172]	0.202644
Trim17	tripartite motif-containing 17 [Source:MGI Symbol;Acc:MGI:1861440]	0.202168
Capn6	calpain 6 [Source:MGI Symbol;Acc:MGI:1100850]	0.19926
Mlana	melan-A [Source:MGI Symbol;Acc:MGI:108454]	0.198824
Mettl7b	integrin alpha 7 [Source:MGI Symbol;Acc:MGI:102700]	0.198621
Ncf1	GTF2I repeat domain containing 2 [Source:MGI Symbol;Acc:MGI:2149780]	0.194937
Gm4969	predicted gene 4969 [Source:MGI Symbol;Acc:MGI:3647482]	0.192767
Ptk6	PTK6 protein tyrosine kinase 6 [Source:MGI Symbol;Acc:MGI:99683]	0.190974
Tmem173	transmembrane protein 173 [Source:MGI Symbol;Acc:MGI:1919762]	0.190408
Xlr3c	X-linked lymphocyte-regulated 5A [Source:MGI Symbol;Acc:MGI:3574108]	0.177722
Gm14290	predicted gene 14290 [Source:MGI Symbol;Acc:MGI:3649702]	0.171899
Col6a3	collagen, type VI, alpha 3 [Source:MGI Symbol;Acc:MGI:88461]	0.171099
Ceacam1	carcinoembryonic antigen-related cell adhesion molecule 1 [Source:MGI Symbol;Acc:MGI:1347245]	0.171057
Trib3	tribbles homolog 3 (Drosophila) [Source:MGI Symbol;Acc:MGI:1345675]	0.170719
Lefty1	left right determination factor 1 [Source:MGI Symbol;Acc:MGI:107405]	0.167078
As3mt	arsenic (+3 oxidation state) methyltransferase [Source:MGI Symbol;Acc:MGI:1929882]	0.166926
Gm15286	predicted gene 15286 [Source:MGI Symbol;Acc:MGI:3705204]	0.163867
2610307P16Rik	RIKEN cDNA 2610307P16 gene [Source:MGI Symbol;Acc:MGI:1919768]	0.159968
CR536618.1	No description	0.158804
G0s2	G0/G1 switch gene 2 [Source:MGI Symbol;Acc:MGI:1316737]	0.157971
Gbx1	gastrulation brain homeobox 1 [Source:MGI Symbol;Acc:MGI:95667]	0.155614
Fggy	FGGY carbohydrate kinase domain containing [Source:MGI Symbol;Acc:MGI:1922828]	0.153686
Chd5	chromodomain helicase DNA binding protein 5 [Source:MGI Symbol;Acc:MGI:3036258]	0.151446
Lrfn2	leucine rich repeat and fibronectin type III domain containing 2 [Source:MGI Symbol;Acc:MGI:1917780]	0.150496
Gm10505	predicted gene 10505 [Source:MGI Symbol;Acc:MGI:3642687]	0.149672
Gm16104	nuclear factor I/C [Source:MGI Symbol;Acc:MGI:109591]	0.149558
1700006J14Rik	high mobility group AT-hook 2 [Source:MGI Symbol;Acc:MGI:101761]	0.149458
BC021614	cDNA sequence BC021614 [Source:MGI Symbol;Acc:MGI:2385078]	0.148821
Evx1	RIKEN cDNA 5730457N03 gene [Source:MGI Symbol;Acc:MGI:1917843]	0.144783
Exoc3l	exocyst complex component 3-like [Source:MGI Symbol;Acc:MGI:3041195]	0.141795
1700029P11Rik	RIKEN cDNA 1700029P11 gene [Source:MGI Symbol;Acc:MGI:1913596]	0.13676
Gm10047	predicted gene 10047 [Source:MGI Symbol;Acc:MGI:3642129]	0.133823
Hoxa10	homeobox A10 [Source:MGI Symbol;Acc:MGI:96171]	0.129818
Lefty2	left-right determination factor 2 [Source:MGI Symbol;Acc:MGI:2443573]	0.128468
Nos3	nitric oxide synthase 3, endothelial cell [Source:MGI Symbol;Acc:MGI:97362]	0.128423
AC124724.1	No description	0.126225
Chic1	cysteine-rich hydrophobic domain 1 [Source:MGI Symbol;Acc:MGI:1344694]	0.124991
Mid1	midline 1 [Source:MGI Symbol;Acc:MGI:1100537]	0.123773
Nupr1	nuclear protein 1 [Source:MGI Symbol;Acc:MGI:1891834]	0.123652
Gucy2g	guanylate cyclase 2g [Source:MGI Symbol;Acc:MGI:106025]	0.119823
Atf5	activating transcription factor 5 [Source:MGI Symbol;Acc:MGI:2141857]	0.113744
Gm11714	phosphatidylinositol transfer protein, cytoplasmic 1 [Source:MGI Symbol;Acc:MGI:1919045]	0.112624
Aqp9	aquaporin 9 [Source:MGI Symbol;Acc:MGI:1891066]	0.102301
H2-T24	RIKEN cDNA A930015D03 gene [Source:MGI Symbol;Acc:MGI:1925060]	0.0929405
P2rx3	purinergic receptor P2X, ligand-gated ion channel, 3 [Source:MGI Symbol;Acc:MGI:1097160]	0.0921585
5730457N03Rik	RIKEN cDNA 5730457N03 gene [Source:MGI Symbol;Acc:MGI:1917843]	0.0902746
Apold1	apolipoprotein L domain containing 1 [Source:MGI Symbol;Acc:MGI:2685921]	0.0876764
Chac1	ChaC, cation transport regulator-like 1 (E. coli) [Source:MGI Symbol;Acc:MGI:1916315]	0.0820839
Nfib	nuclear factor I/B [Source:MGI Symbol;Acc:MGI:103188]	0.0804818
Stc1	stanniocalcin 1 [Source:MGI Symbol;Acc:MGI:109131]	0.077045
Gm14267	predicted gene 14267 [Source:MGI Symbol;Acc:MGI:3649851]	0.0677237
Tceal8	transcription elongation factor A (SII)-like 8 [Source:MGI Symbol;Acc:MGI:1913934]	0.066144
Cxcl17	chemokine (C-X-C motif) ligand 17 [Source:MGI Symbol;Acc:MGI:2387642]	0.0605213
Usp29	ubiquitin specific peptidase 29 [Source:MGI Symbol;Acc:MGI:1888998]	0.0429368
Ndn	necdin [Source:MGI Symbol;Acc:MGI:97290]	0.0424225
Fut1	fucosyltransferase 1 [Source:MGI Symbol;Acc:MGI:109375]	0.0353206
Mmp12	matrix metallopeptidase 12 [Source:MGI Symbol;Acc:MGI:97005]	0.0308955
Tarm1	T cell-interacting, activating receptor on myeloid cells 1 [Source:MGI Symbol;Acc:MGI:2442280]	0.0256035
Gm10451	predicted gene 10451 [Source:MGI Symbol;Acc:MGI:3641898]	0.0190201

## Sheet: DESeq2_and_inten. Diff.<0.05_0D
81 genes dysregulated in Bap1 overexpressing mTSCs growing in stem cell conditions (0D), called by both DESeq2 and intensity difference p<0.05
Probe	Description	Fold change
Ctsj	cathepsin J [Source:MGI Symbol;Acc:MGI:1349426]	45.0143
Wdr31	WD repeat domain 31 [Source:MGI Symbol;Acc:MGI:1918604]	33.4886
Chdh	choline dehydrogenase [Source:MGI Symbol;Acc:MGI:1860776]	31.8883
Rhox6	reproductive homeobox 6 [Source:MGI Symbol;Acc:MGI:1202888]	25.7714
Gpr116	G protein-coupled receptor 116 [Source:MGI Symbol;Acc:MGI:2182928]	25.6085
Arhgef6	Rac/Cdc42 guanine nucleotide exchange factor (GEF) 6 [Source:MGI Symbol;Acc:MGI:1920591]	23.9254
Nfasc	neurofascin [Source:MGI Symbol;Acc:MGI:104753]	22.9248
3632451O06Rik	RIKEN cDNA 3632451O06 gene [Source:MGI Symbol;Acc:MGI:1914669]	22.3817
Tnfrsf9	tumor necrosis factor receptor superfamily, member 9 [Source:MGI Symbol;Acc:MGI:1101059]	21.0337
Emp1	epithelial membrane protein 1 [Source:MGI Symbol;Acc:MGI:107941]	19.0255
Tgm2	regulation of nuclear pre-mRNA domain containing 1B [Source:MGI Symbol;Acc:MGI:1917720]	18.8842
Gm9	predicted gene 9 [Source:MGI Symbol;Acc:MGI:2684855]	18.0728
Rhox9	reproductive homeobox 9 [Source:MGI Symbol;Acc:MGI:1890128]	17.3564
Nrk	Nik related kinase [Source:MGI Symbol;Acc:MGI:1351326]	12.7059
Plekha6	pleckstrin homology domain containing, family A member 6 [Source:MGI Symbol;Acc:MGI:2388662]	11.1704
Chd3	chromodomain helicase DNA binding protein 3 [Source:MGI Symbol;Acc:MGI:1344395]	10.5676
Serpinb9b	serine (or cysteine) peptidase inhibitor, clade B, member 9b [Source:MGI Symbol;Acc:MGI:894668]	9.09337
Pkp2	plakophilin 2 [Source:MGI Symbol;Acc:MGI:1914701]	8.2986
B3gnt3	UDP-GlcNAc:betaGal beta-1,3-N-acetylglucosaminyltransferase 3 [Source:MGI Symbol;Acc:MGI:2152535]	8.16756
3830417A13Rik	RIKEN cDNA 3830417A13 gene [Source:MGI Symbol;Acc:MGI:1917946]	7.53299
Krt7	keratin 7 [Source:MGI Symbol;Acc:MGI:96704]	7.51647
Lgals3	lectin, galactose binding, soluble 3 [Source:MGI Symbol;Acc:MGI:96778]	5.89134
Tacstd2	tumor-associated calcium signal transducer 2 [Source:MGI Symbol;Acc:MGI:1861606]	5.47538
1200009I06Rik	RIKEN cDNA 1200009I06 gene [Source:MGI Symbol;Acc:MGI:1921363]	5.38869
Krt8	keratin 8 [Source:MGI Symbol;Acc:MGI:96705]	5.33849
S1pr1	sphingosine-1-phosphate receptor 1 [Source:MGI Symbol;Acc:MGI:1096355]	5.09352
Pramef12	PRAME family member 12 [Source:MGI Symbol;Acc:MGI:1924882]	5.0286
Ap1m2	adaptor protein complex AP-1, mu 2 subunit [Source:MGI Symbol;Acc:MGI:1336974]	4.84655
Scube3	signal peptide, CUB domain, EGF-like 3 [Source:MGI Symbol;Acc:MGI:3045253]	4.78029
H2-K1	histocompatibility 2, K1, K region [Source:MGI Symbol;Acc:MGI:95904]	4.74593
Nxf7	nuclear RNA export factor 7 [Source:MGI Symbol;Acc:MGI:2159343]	4.14032
H2-D1	histocompatibility 2, D region locus 1 [Source:MGI Symbol;Acc:MGI:95896]	4.13933
Cgn	cingulin [Source:MGI Symbol;Acc:MGI:1927237]	3.91154
Tns4	tensin 4 [Source:MGI Symbol;Acc:MGI:2144377]	3.8825
Klhl13	kelch-like 13 (Drosophila) [Source:MGI Symbol;Acc:MGI:1914705]	3.66142
Baz1a	bromodomain adjacent to zinc finger domain 1A [Source:MGI Symbol;Acc:MGI:1309478]	3.48812
Sfn	stratifin [Source:MGI Symbol;Acc:MGI:1891831]	3.44064
Igf2bp3	RIKEN cDNA 2410003K15 gene [Source:MGI Symbol;Acc:MGI:1922843]	3.32074
Cd82	CD82 antigen [Source:MGI Symbol;Acc:MGI:104651]	3.27174
Bap1	Brca1 associated protein 1 [Source:MGI Symbol;Acc:MGI:1206586]	3.23734
Krt19	keratin 19 [Source:MGI Symbol;Acc:MGI:96693]	3.20885
Id2	inhibitor of DNA binding 2 [Source:MGI Symbol;Acc:MGI:96397]	3.08608
Bcor	BCL6 interacting corepressor [Source:MGI Symbol;Acc:MGI:1918708]	2.89605
Crip2	cysteine rich protein 2 [Source:MGI Symbol;Acc:MGI:1915587]	2.82044
Mest	mesoderm specific transcript [Source:MGI Symbol;Acc:MGI:96968]	2.74712
Dsp	desmoplakin [Source:MGI Symbol;Acc:MGI:109611]	2.55924
Igf2bp2	insulin-like growth factor 2 mRNA binding protein 2 [Source:MGI Symbol;Acc:MGI:1890358]	2.54444
St14	suppression of tumorigenicity 14 (colon carcinoma) [Source:MGI Symbol;Acc:MGI:1338881]	2.4617
Anxa3	annexin A3 [Source:MGI Symbol;Acc:MGI:1201378]	0.420042
Slc20a2	expressed sequence AI316807 [Source:MGI Symbol;Acc:MGI:2142501]	0.418259
Ssbp4	single stranded DNA binding protein 4 [Source:MGI Symbol;Acc:MGI:1924150]	0.393184
Pfkp	pitrilysin metallepetidase 1 [Source:MGI Symbol;Acc:MGI:1916867]	0.391068
Aldh18a1	aldehyde dehydrogenase 18 family, member A1 [Source:MGI Symbol;Acc:MGI:1888908]	0.389761
Exoc6	exocyst complex component 6 [Source:MGI Symbol;Acc:MGI:1351611]	0.386316
Mthfd2	methylenetetrahydrofolate dehydrogenase (NAD+ dependent), methenyltetrahydrofolate cyclohydrolase [Source:MGI Symbol;Acc:MGI:1338850]	0.381579
Tmem98	transmembrane protein 98 [Source:MGI Symbol;Acc:MGI:1923457]	0.35858
Cars	cysteinyl-tRNA synthetase [Source:MGI Symbol;Acc:MGI:1351477]	0.356265
Rps6ka2	ribosomal protein S6 kinase, polypeptide 2 [Source:MGI Symbol;Acc:MGI:1342290]	0.349807
Cyp26a1	cytochrome P450, family 26, subfamily a, polypeptide 1 [Source:MGI Symbol;Acc:MGI:1096359]	0.342227
Prss46	protease, serine, 46 [Source:MGI Symbol;Acc:MGI:1921556]	0.329446
T	brachyury [Source:MGI Symbol;Acc:MGI:98472]	0.327636
Zic3	zinc finger protein of the cerebellum 3 [Source:MGI Symbol;Acc:MGI:106676]	0.326178
Pitpnc1	phosphatidylinositol transfer protein, cytoplasmic 1 [Source:MGI Symbol;Acc:MGI:1919045]	0.31635
Slc7a1	solute carrier family 7 (cationic amino acid transporter, y+ system), member 1 [Source:MGI Symbol;Acc:MGI:88117]	0.309506
Nars	asparaginyl-tRNA synthetase [Source:MGI Symbol;Acc:MGI:1917473]	0.30629
Slc1a4	solute carrier family 1 (glutamate/neutral amino acid transporter), member 4 [Source:MGI Symbol;Acc:MGI:2135601]	0.302706
Pck2	phosphoenolpyruvate carboxykinase 2 (mitochondrial) [Source:MGI Symbol;Acc:MGI:1860456]	0.281888
Fam111a	family with sequence similarity 111, member A [Source:MGI Symbol;Acc:MGI:1915508]	0.279586
Pycr1	pyrroline-5-carboxylate reductase 1 [Source:MGI Symbol;Acc:MGI:2384795]	0.27601
Ifitm2	interferon induced transmembrane protein 2 [Source:MGI Symbol;Acc:MGI:1933382]	0.275475
Psph	phosphoserine phosphatase [Source:MGI Symbol;Acc:MGI:97788]	0.271135
Ly6a	lymphocyte antigen 6 complex, locus A [Source:MGI Symbol;Acc:MGI:107527]	0.269243
Cd37	TEA domain family member 2 [Source:MGI Symbol;Acc:MGI:104904]	0.207663
Trib3	tribbles homolog 3 (Drosophila) [Source:MGI Symbol;Acc:MGI:1345675]	0.170719
As3mt	arsenic (+3 oxidation state) methyltransferase [Source:MGI Symbol;Acc:MGI:1929882]	0.166926
Lefty2	left-right determination factor 2 [Source:MGI Symbol;Acc:MGI:2443573]	0.128468
Nos3	nitric oxide synthase 3, endothelial cell [Source:MGI Symbol;Acc:MGI:97362]	0.128423
Atf5	activating transcription factor 5 [Source:MGI Symbol;Acc:MGI:2141857]	0.113744
Chac1	ChaC, cation transport regulator-like 1 (E. coli) [Source:MGI Symbol;Acc:MGI:1916315]	0.0820839
Tceal8	transcription elongation factor A (SII)-like 8 [Source:MGI Symbol;Acc:MGI:1913934]	0.066144
Mmp12	matrix metallopeptidase 12 [Source:MGI Symbol;Acc:MGI:97005]	0.0308955

## Sheet: DESeq2_and RPKM FC>2_ 3D
1602 genes dysregulated in BAP1 overexpressing mTSCs during differentiation (3D), called by both DESeq2 and RPKM fold change >2
Probe	Description	Fold change
Akr1b10	aldo-keto reductase family 1, member B10 (aldose reductase) [Source:MGI Symbol;Acc:MGI:1915111]	99.6882
Prom2	prominin 2 [Source:MGI Symbol;Acc:MGI:2138997]	98.9445
Fam110c	family with sequence similarity 110, member C [Source:MGI Symbol;Acc:MGI:1918813]	57.7766
Arc	activity regulated cytoskeletal-associated protein [Source:MGI Symbol;Acc:MGI:88067]	55.4578
Pax7	paired box gene 7 [Source:MGI Symbol;Acc:MGI:97491]	51.0881
Mal	myelin and lymphocyte protein, T cell differentiation protein [Source:MGI Symbol;Acc:MGI:892970]	49.1575
Nkx2-9	NK2 transcription factor related, locus 9 (Drosophila) [Source:MGI Symbol;Acc:MGI:1270158]	48.8828
Prl3d1	prolactin family 3, subfamily d, member 1 [Source:MGI Symbol;Acc:MGI:97606]	43.9411
B3gnt3	UDP-GlcNAc:betaGal beta-1,3-N-acetylglucosaminyltransferase 3 [Source:MGI Symbol;Acc:MGI:2152535]	41.9754
Lrrc61	leucine rich repeat containing 61 [Source:MGI Symbol;Acc:MGI:2652848]	39.654
Zbtb8b	zinc finger and BTB domain containing 8b [Source:MGI Symbol;Acc:MGI:2387181]	32.4671
Ccdc39	tetratricopeptide repeat domain 14 [Source:MGI Symbol;Acc:MGI:1914370]	28.8361
3632451O06Rik	RIKEN cDNA 3632451O06 gene [Source:MGI Symbol;Acc:MGI:1914669]	27.6596
Podn	podocan [Source:MGI Symbol;Acc:MGI:2674939]	25.1862
Ccdc158	coiled-coil domain containing 158 [Source:MGI Symbol;Acc:MGI:2444555]	24.4077
Oas1g	2'-5' oligoadenylate synthetase 1G [Source:MGI Symbol;Acc:MGI:97429]	23.9102
Rasl10b	RAS-like, family 10, member B [Source:MGI Symbol;Acc:MGI:2685575]	23.4742
Trim30d	tripartite motif-containing 30D [Source:MGI Symbol;Acc:MGI:3035181]	21.5001
6030405A18Rik	RIKEN cDNA 6030405A18 gene [Source:MGI Symbol;Acc:MGI:3607715]	20.2859
Diras1	DIRAS family, GTP-binding RAS-like 1 [Source:MGI Symbol;Acc:MGI:2183442]	19.5876
C330005M16Rik	RIKEN cDNA C330005M16 gene [Source:MGI Symbol;Acc:MGI:2142121]	18.2236
Foxj1	forkhead box J1 [Source:MGI Symbol;Acc:MGI:1347474]	17.2536
Klk8	kallikrein related-peptidase 8 [Source:MGI Symbol;Acc:MGI:1343327]	16.9926
Samd9l	sterile alpha motif domain containing 9-like [Source:MGI Symbol;Acc:MGI:1343184]	16.5793
Upk2	uroplakin 2 [Source:MGI Symbol;Acc:MGI:98913]	16.5047
Crmp1	collapsin response mediator protein 1 [Source:MGI Symbol;Acc:MGI:107793]	16.4002
Col22a1	collagen, type XXII, alpha 1 [Source:MGI Symbol;Acc:MGI:1916950]	15.8721
Emp1	epithelial membrane protein 1 [Source:MGI Symbol;Acc:MGI:107941]	15.1235
Mt4	metallothionein 4 [Source:MGI Symbol;Acc:MGI:99692]	14.9299
Syt5	synaptotagmin V [Source:MGI Symbol;Acc:MGI:1926368]	14.7751
Kng2	kininogen 2 [Source:MGI Symbol;Acc:MGI:3027157]	14.4804
Gm9	predicted gene 9 [Source:MGI Symbol;Acc:MGI:2684855]	14.4236
Sec14l5	SEC14-like 5 (S. cerevisiae) [Source:MGI Symbol;Acc:MGI:3616084]	13.7913
Synpo2	synaptopodin 2 [Source:MGI Symbol;Acc:MGI:2153070]	13.4223
Fam188b	family with sequence similarity 188, member B [Source:MGI Symbol;Acc:MGI:3583959]	13.3582
Ttll7	tubulin tyrosine ligase-like family, member 7 [Source:MGI Symbol;Acc:MGI:1918142]	13.3087
Isg15	ISG15 ubiquitin-like modifier [Source:MGI Symbol;Acc:MGI:1855694]	12.907
Zkscan16	zinc finger with KRAB and SCAN domains 16 [Source:MGI Symbol;Acc:MGI:3510405]	12.2884
Alox12	arachidonate 12-lipoxygenase [Source:MGI Symbol;Acc:MGI:87998]	11.9518
Slc39a4	solute carrier family 39 (zinc transporter), member 4 [Source:MGI Symbol;Acc:MGI:1919277]	11.883
Tpbpa	trophoblast specific protein alpha [Source:MGI Symbol;Acc:MGI:98795]	11.7638
Psmb9	proteasome (prosome, macropain) subunit, beta type 9 (large multifunctional peptidase 2) [Source:MGI Symbol;Acc:MGI:1346526]	11.7324
Pigz	phosphatidylinositol glycan anchor biosynthesis, class Z [Source:MGI Symbol;Acc:MGI:2443822]	11.6924
Sfrp5	secreted frizzled-related sequence protein 5 [Source:MGI Symbol;Acc:MGI:1860298]	11.3614
Srms	src-related kinase lacking C-terminal regulatory tyrosine and N-terminal myristylation sites [Source:MGI Symbol;Acc:MGI:101865]	11.1275
Endou	endonuclease, polyU-specific [Source:MGI Symbol;Acc:MGI:97746]	10.9304
Parp14	poly (ADP-ribose) polymerase family, member 14 [Source:MGI Symbol;Acc:MGI:1919489]	10.9239
Rhox4b	reproductive homeobox 4B [Source:MGI Symbol;Acc:MGI:1930129]	10.8418
Gprin1	G protein-regulated inducer of neurite outgrowth 1 [Source:MGI Symbol;Acc:MGI:1349455]	10.7983
H2-T22	RIKEN cDNA A930015D03 gene [Source:MGI Symbol;Acc:MGI:1925060]	10.614
Paqr7	progestin and adipoQ receptor family member VII [Source:MGI Symbol;Acc:MGI:1919154]	10.5357
Stk32c	serine/threonine kinase 32C [Source:MGI Symbol;Acc:MGI:2385336]	10.5021
Pdk4	pyruvate dehydrogenase kinase, isoenzyme 4 [Source:MGI Symbol;Acc:MGI:1351481]	10.2135
Gabra4	gamma-aminobutyric acid (GABA) A receptor, subunit alpha 4 [Source:MGI Symbol;Acc:MGI:95616]	10.1914
Mlkl	mixed lineage kinase domain-like [Source:MGI Symbol;Acc:MGI:1921818]	10.0435
Ephb6	Eph receptor B6 [Source:MGI Symbol;Acc:MGI:1096338]	10.0305
Fezf1	Fez family zinc finger 1 [Source:MGI Symbol;Acc:MGI:1920441]	9.73028
Elfn2	leucine rich repeat and fibronectin type III, extracellular 2 [Source:MGI Symbol;Acc:MGI:3608416]	9.18049
Lrrc15	leucine rich repeat containing 15 [Source:MGI Symbol;Acc:MGI:1921738]	9.14117
BC068157	ecotropic viral integration site 5 like [Source:MGI Symbol;Acc:MGI:2442167]	9.12286
Usp18	ubiquitin specific peptidase 18 [Source:MGI Symbol;Acc:MGI:1344364]	9.1133
Psg29	pregnancy-specific glycoprotein 29 [Source:MGI Symbol;Acc:MGI:1891361]	9.08794
Krt79	keratin 79 [Source:MGI Symbol;Acc:MGI:2385030]	8.74507
Parp12	poly (ADP-ribose) polymerase family, member 12 [Source:MGI Symbol;Acc:MGI:2143990]	8.67912
Zbp1	Z-DNA binding protein 1 [Source:MGI Symbol;Acc:MGI:1927449]	8.65375
Acsl6	acyl-CoA synthetase long-chain family member 6 [Source:MGI Symbol;Acc:MGI:894291]	8.17981
2610018G03Rik	RIKEN cDNA 2610018G03 gene [Source:MGI Symbol;Acc:MGI:1917665]	8.15446
Itga11	integrin alpha 11 [Source:MGI Symbol;Acc:MGI:2442114]	8.12758
H2-K1	histocompatibility 2, K1, K region [Source:MGI Symbol;Acc:MGI:95904]	8.10637
Surf2	surfeit gene 1 [Source:MGI Symbol;Acc:MGI:98443]	7.9657
Hmgn3	high mobility group nucleosomal binding domain 3 [Source:MGI Symbol;Acc:MGI:2138069]	7.81797
Gm5514	predicted gene 5514 [Source:MGI Symbol;Acc:MGI:3645435]	7.71718
Plcl1	phospholipase C-like 1 [Source:MGI Symbol;Acc:MGI:3036262]	7.70094
Icam1	intercellular adhesion molecule 1 [Source:MGI Symbol;Acc:MGI:96392]	7.69011
Tacstd2	tumor-associated calcium signal transducer 2 [Source:MGI Symbol;Acc:MGI:1861606]	7.68838
Rtp4	receptor transporter protein 4 [Source:MGI Symbol;Acc:MGI:1915025]	7.60106
Mrc1	mannose receptor, C type 1 [Source:MGI Symbol;Acc:MGI:97142]	7.56976
Rab32	RAB32, member RAS oncogene family [Source:MGI Symbol;Acc:MGI:1915094]	7.51198
Cd164l2	G-protein coupled receptor 3 [Source:MGI Symbol;Acc:MGI:101908]	7.47529
Oas1a	2'-5' oligoadenylate synthetase 1A [Source:MGI Symbol;Acc:MGI:2180860]	7.43723
Il10ra	interleukin 10 receptor, alpha [Source:MGI Symbol;Acc:MGI:96538]	7.40199
Lpar5	lysophosphatidic acid receptor 5 [Source:MGI Symbol;Acc:MGI:2685918]	7.4018
4930412F15Rik	RIKEN cDNA 4930412F15 gene [Source:MGI Symbol;Acc:MGI:2441678]	7.38089
Ifi27l1	interferon, alpha-inducible protein 27 like 1 [Source:MGI Symbol;Acc:MGI:1277180]	7.24503
Vtcn1	V-set domain containing T cell activation inhibitor 1 [Source:MGI Symbol;Acc:MGI:3039619]	7.22584
Espn	espin [Source:MGI Symbol;Acc:MGI:1861630]	7.19419
Edn3	endothelin 3 [Source:MGI Symbol;Acc:MGI:95285]	7.10901
Kcnq2	potassium voltage-gated channel, subfamily Q, member 2 [Source:MGI Symbol;Acc:MGI:1309503]	7.10269
Zfp182	zinc finger protein 182 [Source:MGI Symbol;Acc:MGI:2442220]	7.07706
Gm11127	cDNA sequence BC023719 [Source:MGI Symbol;Acc:MGI:3574836]	7.0094
Cdh23	cadherin 23 (otocadherin) [Source:MGI Symbol;Acc:MGI:1890219]	6.879
Xaf1	XIAP associated factor 1 [Source:MGI Symbol;Acc:MGI:3772572]	6.82387
Itgb4	integrin beta 4 [Source:MGI Symbol;Acc:MGI:96613]	6.70801
2006-09-01	predicted gene 15008 [Source:MGI Symbol;Acc:MGI:3705107]	6.66273
Tap1	proteasome (prosome, macropain) subunit, beta type 9 (large multifunctional peptidase 2) [Source:MGI Symbol;Acc:MGI:1346526]	6.64201
Mb	myoglobin [Source:MGI Symbol;Acc:MGI:96922]	6.60545
Gbp3	guanylate binding protein 3 [Source:MGI Symbol;Acc:MGI:1926263]	6.58383
Ckmt1	creatine kinase, mitochondrial 1, ubiquitous [Source:MGI Symbol;Acc:MGI:99441]	6.56124
Gbp7	guanylate binding protein 7 [Source:MGI Symbol;Acc:MGI:2444421]	6.53015
Lepr	leptin receptor [Source:MGI Symbol;Acc:MGI:104993]	6.47798
Gabre	gamma-aminobutyric acid (GABA) A receptor, subunit epsilon [Source:MGI Symbol;Acc:MGI:1330235]	6.46472
Itga4	integrin alpha 4 [Source:MGI Symbol;Acc:MGI:96603]	6.45923
Irgm2	interferon gamma induced GTPase [Source:MGI Symbol;Acc:MGI:107729]	6.42495
H2-Q2	histocompatibility 2, Q region locus 2 [Source:MGI Symbol;Acc:MGI:95931]	6.42348
Ush1g	otopetrin 2 [Source:MGI Symbol;Acc:MGI:2388365]	6.3973
Ifit1	interferon-induced protein with tetratricopeptide repeats 1 [Source:MGI Symbol;Acc:MGI:99450]	6.39218
Glp1r	glucagon-like peptide 1 receptor [Source:MGI Symbol;Acc:MGI:99571]	6.38666
Igtp	interferon gamma induced GTPase [Source:MGI Symbol;Acc:MGI:107729]	6.33372
Gpr179	G protein-coupled receptor 179 [Source:MGI Symbol;Acc:MGI:2443409]	6.33224
Vax2	Vax2 opposite strand transcript 2 [Source:MGI Symbol;Acc:MGI:3583303]	6.3287
2003-09-01	septin 3 [Source:MGI Symbol;Acc:MGI:1345148]	6.26778
Adamts2	predicted gene 12198 [Source:MGI Symbol;Acc:MGI:3650407]	6.26743
Rhox4d	reproductive homeobox 4D [Source:MGI Symbol;Acc:MGI:3613388]	6.25157
Kif19a	kinesin family member 19A [Source:MGI Symbol;Acc:MGI:2447024]	6.24042
2610109H07Rik	RIKEN cDNA 2610109H07 gene [Source:MGI Symbol;Acc:MGI:1917683]	6.18117
Shank2	SH3/ankyrin domain gene 2 [Source:MGI Symbol;Acc:MGI:2671987]	6.15454
Ccnd2	cyclin D2 [Source:MGI Symbol;Acc:MGI:88314]	6.15319
Lpin1	lipin 1 [Source:MGI Symbol;Acc:MGI:1891340]	6.11045
Ccr4	chemokine (C-C motif) receptor 4 [Source:MGI Symbol;Acc:MGI:107824]	6.00251
Gna15	guanine nucleotide binding protein, alpha 15 [Source:MGI Symbol;Acc:MGI:95770]	5.96918
Crabp2	cellular retinoic acid binding protein II [Source:MGI Symbol;Acc:MGI:88491]	5.95344
Elovl2	elongation of very long chain fatty acids (FEN1/Elo2, SUR4/Elo3, yeast)-like 2 [Source:MGI Symbol;Acc:MGI:1858960]	5.92614
Gsc	goosecoid homeobox [Source:MGI Symbol;Acc:MGI:95841]	5.90072
Rab39	RAB39, member RAS oncogene family [Source:MGI Symbol;Acc:MGI:2442855]	5.87862
Irf7	PHD and ring finger domains 1 [Source:MGI Symbol;Acc:MGI:2141847]	5.87501
Tmem130	transmembrane protein 130 [Source:MGI Symbol;Acc:MGI:3607706]	5.87126
Il17re	interleukin 17 receptor E [Source:MGI Symbol;Acc:MGI:1889371]	5.82766
Creb3l3	cAMP responsive element binding protein 3-like 3 [Source:MGI Symbol;Acc:MGI:2384786]	5.82067
Arhgap20	Rho GTPase activating protein 20 [Source:MGI Symbol;Acc:MGI:2445175]	5.78587
Slc45a3	solute carrier family 45, member 3 [Source:MGI Symbol;Acc:MGI:1922082]	5.78214
Ddx58	DEAD (Asp-Glu-Ala-Asp) box polypeptide 58 [Source:MGI Symbol;Acc:MGI:2442858]	5.75571
Pld4	phospholipase D family, member 4 [Source:MGI Symbol;Acc:MGI:2144765]	5.73799
1700007K13Rik	RIKEN cDNA 1700007K13 gene [Source:MGI Symbol;Acc:MGI:1916577]	5.71873
Grip2	glutamate receptor interacting protein 2 [Source:MGI Symbol;Acc:MGI:2681173]	5.66066
Ap1m2	adaptor protein complex AP-1, mu 2 subunit [Source:MGI Symbol;Acc:MGI:1336974]	5.66053
Clic6	RIKEN cDNA 2410124H12 gene [Source:MGI Symbol;Acc:MGI:1924035]	5.64932
Surf1	surfeit gene 1 [Source:MGI Symbol;Acc:MGI:98443]	5.6355
Pi16	peptidase inhibitor 16 [Source:MGI Symbol;Acc:MGI:1921366]	5.60506
Cobl	cordon-bleu [Source:MGI Symbol;Acc:MGI:105056]	5.60372
Trpv4	transient receptor potential cation channel, subfamily V, member 4 [Source:MGI Symbol;Acc:MGI:1926945]	5.59927
Sult4a1	sulfotransferase family 4A, member 1 [Source:MGI Symbol;Acc:MGI:1888971]	5.56786
Ephx1	epoxide hydrolase 1, microsomal [Source:MGI Symbol;Acc:MGI:95405]	5.52501
Snhg11	small nucleolar RNA host gene 11 [Source:MGI Symbol;Acc:MGI:2441845]	5.52173
Irgm1	immunity-related GTPase family M member 1 [Source:MGI Symbol;Acc:MGI:107567]	5.50271
Runx3	runt related transcription factor 3 [Source:MGI Symbol;Acc:MGI:102672]	5.47595
Ins2	insulin II [Source:MGI Symbol;Acc:MGI:96573]	5.46009
Zfp641	zinc finger protein 641 [Source:MGI Symbol;Acc:MGI:2442788]	5.45554
Rspo1	predicted gene 12930 [Source:MGI Symbol;Acc:MGI:3650529]	5.429
Dgkk	diacylglycerol kinase kappa [Source:MGI Symbol;Acc:MGI:3580254]	5.42021
Ltb	lymphotoxin B [Source:MGI Symbol;Acc:MGI:104796]	5.41213
Dusp27	dual specificity phosphatase 27 (putative) [Source:MGI Symbol;Acc:MGI:2685055]	5.41087
Prelp	predicted gene 15851 [Source:MGI Symbol;Acc:MGI:3801734]	5.39425
Rab3il1	RAB3A interacting protein (rabin3)-like 1 [Source:MGI Symbol;Acc:MGI:1922010]	5.38715
Scn5a	sodium channel, voltage-gated, type V, alpha [Source:MGI Symbol;Acc:MGI:98251]	5.3121
Derl3	Der1-like domain family, member 3 [Source:MGI Symbol;Acc:MGI:1917627]	5.29747
Atp6v0e2	ATPase, H+ transporting, lysosomal V0 subunit E2 [Source:MGI Symbol;Acc:MGI:1923502]	5.29667
Mx2	myxovirus (influenza virus) resistance 2 [Source:MGI Symbol;Acc:MGI:97244]	5.28707
Cdhr1	cadherin-related family member 1 [Source:MGI Symbol;Acc:MGI:2157782]	5.2856
Pklr	pyruvate kinase liver and red blood cell [Source:MGI Symbol;Acc:MGI:97604]	5.27781
Hoxb13	homeobox B13 [Source:MGI Symbol;Acc:MGI:107730]	5.27366
Hs3st6	heparan sulfate (glucosamine) 3-O-sulfotransferase 6 [Source:MGI Symbol;Acc:MGI:3580487]	5.24699
Srxn1	sulfiredoxin 1 homolog (S. cerevisiae) [Source:MGI Symbol;Acc:MGI:104971]	5.24591
Tspan12	tetraspanin 12 [Source:MGI Symbol;Acc:MGI:1889818]	5.22492
Krt80	keratin 80 [Source:MGI Symbol;Acc:MGI:1921377]	5.21806
Nccrp1	sterile alpha motif domain containing 4B [Source:MGI Symbol;Acc:MGI:2448542]	5.20562
Cbr3	carbonyl reductase 3 [Source:MGI Symbol;Acc:MGI:1309992]	5.20086
Ggt6	gamma-glutamyltransferase 6 [Source:MGI Symbol;Acc:MGI:1918772]	5.17339
Tgfb3	tubulin tyrosine ligase-like family, member 5 [Source:MGI Symbol;Acc:MGI:2443657]	5.13824
Ces1a	carboxylesterase 1A [Source:MGI Symbol;Acc:MGI:3648919]	5.10606
Vipr2	vasoactive intestinal peptide receptor 2 [Source:MGI Symbol;Acc:MGI:107166]	5.09384
Gpr50	G-protein-coupled receptor 50 [Source:MGI Symbol;Acc:MGI:1333877]	5.0642
Atp6v1c2	protein disulfide isomerase associated 6 [Source:MGI Symbol;Acc:MGI:1919103]	5.0518
Trpm5	transient receptor potential cation channel, subfamily M, member 5 [Source:MGI Symbol;Acc:MGI:1861718]	5.01565
Dtx3l	deltex 3-like (Drosophila) [Source:MGI Symbol;Acc:MGI:2656973]	5.01001
Ddit4l	DNA-damage-inducible transcript 4-like [Source:MGI Symbol;Acc:MGI:1920534]	4.95705
Prl7d1	prolactin family 7, subfamily d, member 1 [Source:MGI Symbol;Acc:MGI:97619]	4.95154
Scube3	signal peptide, CUB domain, EGF-like 3 [Source:MGI Symbol;Acc:MGI:3045253]	4.93739
Cpne5	copine V [Source:MGI Symbol;Acc:MGI:2385908]	4.88127
Rasa4	RAS p21 protein activator 4 [Source:MGI Symbol;Acc:MGI:1858600]	4.8756
Hdac11	histone deacetylase 11 [Source:MGI Symbol;Acc:MGI:2385252]	4.86872
Gatm	glycine amidinotransferase (L-arginine:glycine amidinotransferase) [Source:MGI Symbol;Acc:MGI:1914342]	4.83987
Prss12	protease, serine, 12 neurotrypsin (motopsin) [Source:MGI Symbol;Acc:MGI:1100881]	4.82627
Fbxo2	F-box protein 2 [Source:MGI Symbol;Acc:MGI:2446216]	4.80151
Sh2d5	SH2 domain containing 5 [Source:MGI Symbol;Acc:MGI:2446215]	4.7811
Adamtsl5	ADAMTS-like 5 [Source:MGI Symbol;Acc:MGI:1913798]	4.76056
Uba7	ubiquitin-like modifier activating enzyme 7 [Source:MGI Symbol;Acc:MGI:1349462]	4.74843
Hivep3	human immunodeficiency virus type I enhancer binding protein 3 [Source:MGI Symbol;Acc:MGI:106589]	4.74699
Tubb3	predicted gene 20388 [Source:MGI Symbol;Acc:MGI:5141853]	4.74631
D630045J12Rik	ATPase, H+ transporting, lysosomal V0 subunit A4 [Source:MGI Symbol;Acc:MGI:2153480]	4.7396
Ephb2	Eph receptor B2 [Source:MGI Symbol;Acc:MGI:99611]	4.73335
Nfe2l3	nuclear factor, erythroid derived 2, like 3 [Source:MGI Symbol;Acc:MGI:1339958]	4.73109
Gdpd3	glycerophosphodiester phosphodiesterase domain containing 3 [Source:MGI Symbol;Acc:MGI:1915866]	4.72352
D630003M21Rik	RIKEN cDNA D630003M21 gene [Source:MGI Symbol;Acc:MGI:3606579]	4.71702
Elfn1	leucine rich repeat and fibronectin type III, extracellular 1 [Source:MGI Symbol;Acc:MGI:2442479]	4.68879
Ctsh	cathepsin H [Source:MGI Symbol;Acc:MGI:107285]	4.67303
Card14	caspase recruitment domain family, member 14 [Source:MGI Symbol;Acc:MGI:2386258]	4.67
Rnf213	ring finger protein 213 [Source:MGI Symbol;Acc:MGI:1289196]	4.66498
Mgst1	microsomal glutathione S-transferase 1 [Source:MGI Symbol;Acc:MGI:1913850]	4.63925
Sytl1	synaptotagmin-like 1 [Source:MGI Symbol;Acc:MGI:1933365]	4.63021
Pdzk1	CD160 antigen [Source:MGI Symbol;Acc:MGI:1860383]	4.62536
Prrg4	proline rich Gla (G-carboxyglutamic acid) 4 (transmembrane) [Source:MGI Symbol;Acc:MGI:2442211]	4.61022
Gbp1	guanylate binding protein 1 [Source:MGI Symbol;Acc:MGI:95666]	4.58315
Gbgt1	globoside alpha-1,3-N-acetylgalactosaminyltransferase 1 [Source:MGI Symbol;Acc:MGI:2449143]	4.5729
Sfrp2	secreted frizzled-related protein 2 [Source:MGI Symbol;Acc:MGI:108078]	4.49546
Tmem52	transmembrane protein 52 [Source:MGI Symbol;Acc:MGI:1916921]	4.48879
Lgals3bp	lectin, galactoside-binding, soluble, 3 binding protein [Source:MGI Symbol;Acc:MGI:99554]	4.47736
Tap2	predicted gene 20496 [Source:MGI Symbol;Acc:MGI:5141961]	4.44
Ltc4s	leukotriene C4 synthase [Source:MGI Symbol;Acc:MGI:107498]	4.4333
Plxna1	plexin A1 [Source:MGI Symbol;Acc:MGI:107685]	4.41098
Prl2c5	prolactin family 2, subfamily c, member 5 [Source:MGI Symbol;Acc:MGI:1858413]	4.39404
Dnaic2	dynein, axonemal, intermediate chain 2 [Source:MGI Symbol;Acc:MGI:2685574]	4.39296
Oas3	2'-5' oligoadenylate synthetase 3 [Source:MGI Symbol;Acc:MGI:2180850]	4.36019
Prrt3	proline-rich transmembrane protein 3 [Source:MGI Symbol;Acc:MGI:2444810]	4.34433
Wnt4	wingless-related MMTV integration site 4 [Source:MGI Symbol;Acc:MGI:98957]	4.33287
Kcnt1	potassium channel, subfamily T, member 1 [Source:MGI Symbol;Acc:MGI:1924627]	4.33131
Gm11611	SRC kinase signaling inhibitor 1 [Source:MGI Symbol;Acc:MGI:1933179]	4.30413
Chd3	chromodomain helicase DNA binding protein 3 [Source:MGI Symbol;Acc:MGI:1344395]	4.2864
Rap1gap	Rap1 GTPase-activating protein [Source:MGI Symbol;Acc:MGI:109338]	4.27021
Flt4	FMS-like tyrosine kinase 4 [Source:MGI Symbol;Acc:MGI:95561]	4.26781
Gm14137	DnaJ (Hsp40) homolog, subfamily C, member 17 [Source:MGI Symbol;Acc:MGI:1916658]	4.26672
Tnk1	phospholipid scramblase 3 [Source:MGI Symbol;Acc:MGI:1917560]	4.23608
Ank3	ankyrin 3, epithelial [Source:MGI Symbol;Acc:MGI:88026]	4.22621
Flrt1	MACRO domain containing 1 [Source:MGI Symbol;Acc:MGI:2147583]	4.22011
Tmem14a	transmembrane protein 14A [Source:MGI Symbol;Acc:MGI:1922962]	4.20676
Fam174b	RIKEN cDNA A830073O21 gene [Source:MGI Symbol;Acc:MGI:2443692]	4.20021
6030419C18Rik	RIKEN cDNA 6030419C18 gene [Source:MGI Symbol;Acc:MGI:2442108]	4.1958
Elavl3	ELAV (embryonic lethal, abnormal vision, Drosophila)-like 3 (Hu antigen C) [Source:MGI Symbol;Acc:MGI:109157]	4.18645
Nr3c2	predicted gene 10649 [Source:MGI Symbol;Acc:MGI:3642042]	4.18593
Parp9	deltex 3-like (Drosophila) [Source:MGI Symbol;Acc:MGI:2656973]	4.16641
Rhox12	reproductive homeobox 12 [Source:MGI Symbol;Acc:MGI:2685994]	4.16441
Cryab	crystallin, alpha B [Source:MGI Symbol;Acc:MGI:88516]	4.15188
Slc13a3	solute carrier family 13 (sodium-dependent dicarboxylate transporter), member 3 [Source:MGI Symbol;Acc:MGI:2149635]	4.14976
Ptger4	tetratricopeptide repeat domain 33 [Source:MGI Symbol;Acc:MGI:1914765]	4.11876
Cldn7	claudin 7 [Source:MGI Symbol;Acc:MGI:1859285]	4.11815
Phospho1	zinc finger protein 652 [Source:MGI Symbol;Acc:MGI:2442221]	4.10067
Kiss1r	RIKEN cDNA C030046I01 gene [Source:MGI Symbol;Acc:MGI:1924814]	4.09284
Igfbp3	insulin-like growth factor binding protein 3 [Source:MGI Symbol;Acc:MGI:96438]	4.08956
Scnn1b	sodium channel, nonvoltage-gated 1 beta [Source:MGI Symbol;Acc:MGI:104696]	4.0853
Fam20c	family with sequence similarity 20, member C [Source:MGI Symbol;Acc:MGI:2136853]	4.07266
E330009J07Rik	RIKEN cDNA E330009J07 gene [Source:MGI Symbol;Acc:MGI:2444256]	4.07226
Chst13	carbohydrate (chondroitin 4) sulfotransferase 13 [Source:MGI Symbol;Acc:MGI:1919047]	4.06903
Lpl	lipoprotein lipase [Source:MGI Symbol;Acc:MGI:96820]	4.06405
Fmn2	formin 2 [Source:MGI Symbol;Acc:MGI:1859252]	4.06385
Mmp24	matrix metallopeptidase 24 [Source:MGI Symbol;Acc:MGI:1341867]	4.05752
Plekhn1	pleckstrin homology domain containing, family N member 1 [Source:MGI Symbol;Acc:MGI:2387630]	4.05245
Emid1	EMI domain containing 1 [Source:MGI Symbol;Acc:MGI:2155091]	4.0499
Ankrd9	ankyrin repeat domain 9 [Source:MGI Symbol;Acc:MGI:1921501]	4.0438
C3ar1	complement component 3a receptor 1 [Source:MGI Symbol;Acc:MGI:1097680]	4.03324
Pou3f1	POU domain, class 3, transcription factor 1 [Source:MGI Symbol;Acc:MGI:101896]	4.00873
Abcb1b	ATP-binding cassette, sub-family B (MDR/TAP), member 1B [Source:MGI Symbol;Acc:MGI:97568]	4.00782
Tmem54	transmembrane protein 54 [Source:MGI Symbol;Acc:MGI:1913510]	3.99162
Clu	clusterin [Source:MGI Symbol;Acc:MGI:88423]	3.99012
Camkk1	calcium/calmodulin-dependent protein kinase kinase 1, alpha [Source:MGI Symbol;Acc:MGI:1891766]	3.98458
Nrp1	neuropilin 1 [Source:MGI Symbol;Acc:MGI:106206]	3.97685
Evpl	envoplakin [Source:MGI Symbol;Acc:MGI:107507]	3.97119
Sema6c	sema domain, transmembrane domain (TM), and cytoplasmic domain, (semaphorin) 6C [Source:MGI Symbol;Acc:MGI:1338032]	3.96769
Adamts1	a disintegrin-like and metallopeptidase (reprolysin type) with thrombospondin type 1 motif, 1 [Source:MGI Symbol;Acc:MGI:109249]	3.96421
2810021J22Rik	RIKEN cDNA 2810021J22 gene [Source:MGI Symbol;Acc:MGI:1917194]	3.95292
Izumo4	IZUMO family member 4 [Source:MGI Symbol;Acc:MGI:1918814]	3.95119
Fndc5	fibronectin type III domain containing 5 [Source:MGI Symbol;Acc:MGI:1917614]	3.95032
Aqp9	aquaporin 9 [Source:MGI Symbol;Acc:MGI:1891066]	3.9487
Ptges	prostaglandin E synthase [Source:MGI Symbol;Acc:MGI:1927593]	3.94793
Gabarapl1	gamma-aminobutyric acid (GABA) A receptor-associated protein-like 1 [Source:MGI Symbol;Acc:MGI:1914980]	3.94049
Gm20696	forkhead box P1 [Source:MGI Symbol;Acc:MGI:1914004]	3.93997
Hipk2	homeodomain interacting protein kinase 2 [Source:MGI Symbol;Acc:MGI:1314872]	3.93486
Fosl1	fos-like antigen 1 [Source:MGI Symbol;Acc:MGI:107179]	3.92927
Lipa	lysosomal acid lipase A [Source:MGI Symbol;Acc:MGI:96789]	3.8978
Tlr2	toll-like receptor 2 [Source:MGI Symbol;Acc:MGI:1346060]	3.85789
Fads2	fatty acid desaturase 2 [Source:MGI Symbol;Acc:MGI:1930079]	3.85304
Irf5	interferon regulatory factor 5 [Source:MGI Symbol;Acc:MGI:1350924]	3.84918
Ttyh2	tweety homolog 2 (Drosophila) [Source:MGI Symbol;Acc:MGI:2157091]	3.84759
Elmod1	ELMO domain containing 1 [Source:MGI Symbol;Acc:MGI:3583900]	3.84535
Megf6	multiple EGF-like-domains 6 [Source:MGI Symbol;Acc:MGI:1919351]	3.84156
Adam8	predicted gene 16201 [Source:MGI Symbol;Acc:MGI:3802153]	3.84067
Peli3	pellino 3 [Source:MGI Symbol;Acc:MGI:1924963]	3.83471
Nrn1	neuritin 1 [Source:MGI Symbol;Acc:MGI:1915654]	3.83323
Hcn3	pyruvate kinase liver and red blood cell [Source:MGI Symbol;Acc:MGI:97604]	3.80944
Pck1	phosphoenolpyruvate carboxykinase 1, cytosolic [Source:MGI Symbol;Acc:MGI:97501]	3.8079
Tcp11l2	t-complex 11 (mouse) like 2 [Source:MGI Symbol;Acc:MGI:2444679]	3.77854
Sgk2	serum/glucocorticoid regulated kinase 2 [Source:MGI Symbol;Acc:MGI:1351318]	3.773
Osgin1	oxidative stress induced growth inhibitor 1 [Source:MGI Symbol;Acc:MGI:1919089]	3.76745
Nhedc1	Na+/H+ exchanger domain containing 1 [Source:MGI Symbol;Acc:MGI:1921696]	3.76306
Glb1l2	beta-1,3-glucuronyltransferase 1 (glucuronosyltransferase P) [Source:MGI Symbol;Acc:MGI:1924148]	3.76291
Espnl	espin-like [Source:MGI Symbol;Acc:MGI:2685402]	3.74922
2010015L04Rik	RIKEN cDNA 5830444B04 gene [Source:MGI Symbol;Acc:MGI:3603170]	3.74489
Gbp2	guanylate binding protein 2 [Source:MGI Symbol;Acc:MGI:102772]	3.74165
Rap1gap2	RAP1 GTPase activating protein 2 [Source:MGI Symbol;Acc:MGI:3028623]	3.72705
Dact1	dapper homolog 1, antagonist of beta-catenin (xenopus) [Source:MGI Symbol;Acc:MGI:1891740]	3.71099
Ttc38	tetratricopeptide repeat domain 38 [Source:MGI Symbol;Acc:MGI:2146198]	3.70956
Rnf152	ring finger protein 152 [Source:MGI Symbol;Acc:MGI:2443787]	3.70711
Ryr1	ryanodine receptor 1, skeletal muscle [Source:MGI Symbol;Acc:MGI:99659]	3.7001
Rab37	RAB37, member of RAS oncogene family [Source:MGI Symbol;Acc:MGI:1929945]	3.68795
Trim14	N-acetylneuraminic acid synthase (sialic acid synthase) [Source:MGI Symbol;Acc:MGI:2149820]	3.68715
Pde1c	phosphodiesterase 1C [Source:MGI Symbol;Acc:MGI:108413]	3.68578
Tcf19	transcription factor 19 [Source:MGI Symbol;Acc:MGI:103180]	3.68244
Fam46c	family with sequence similarity 46, member C [Source:MGI Symbol;Acc:MGI:1921895]	3.67782
Dyrk4	dual-specificity tyrosine-(Y)-phosphorylation regulated kinase 4 [Source:MGI Symbol;Acc:MGI:1330292]	3.67767
Lamc2	laminin, gamma 2 [Source:MGI Symbol;Acc:MGI:99913]	3.66725
Reep1	receptor accessory protein 1 [Source:MGI Symbol;Acc:MGI:1098827]	3.66498
Pgf	placental growth factor [Source:MGI Symbol;Acc:MGI:105095]	3.65432
Traf5	TNF receptor-associated factor 5 [Source:MGI Symbol;Acc:MGI:107548]	3.65344
Lin28b	lin-28 homolog B (C. elegans) [Source:MGI Symbol;Acc:MGI:3584032]	3.65323
H2-Q4	predicted gene 11131 [Source:MGI Symbol;Acc:MGI:3779386]	3.65128
Dmrt2	doublesex and mab-3 related transcription factor 2 [Source:MGI Symbol;Acc:MGI:1330307]	3.64253
Ldhb	lactate dehydrogenase B [Source:MGI Symbol;Acc:MGI:96763]	3.63662
Dhx58	predicted gene 11547 [Source:MGI Symbol;Acc:MGI:3705104]	3.62919
Ifih1	interferon induced with helicase C domain 1 [Source:MGI Symbol;Acc:MGI:1918836]	3.62304
Myb	myeloblastosis oncogene [Source:MGI Symbol;Acc:MGI:97249]	3.61259
Phf21b	PHD finger protein 21B [Source:MGI Symbol;Acc:MGI:2443812]	3.59923
Myh14	myosin, heavy polypeptide 14 [Source:MGI Symbol;Acc:MGI:1919210]	3.59597
Map3k14	mitogen-activated protein kinase kinase kinase 14 [Source:MGI Symbol;Acc:MGI:1858204]	3.59556
Stab1	5'-nucleotidase domain containing 2 [Source:MGI Symbol;Acc:MGI:1917271]	3.5697
Ophn1	oligophrenin 1 [Source:MGI Symbol;Acc:MGI:2151070]	3.56865
Igsf9b	immunoglobulin superfamily, member 9B [Source:MGI Symbol;Acc:MGI:2685354]	3.56777
Tmprss6	transmembrane serine protease 6 [Source:MGI Symbol;Acc:MGI:1919003]	3.55931
Dpysl3	dihydropyrimidinase-like 3 [Source:MGI Symbol;Acc:MGI:1349762]	3.55576
Tnfaip8l1	tumor necrosis factor, alpha-induced protein 8-like 1 [Source:MGI Symbol;Acc:MGI:1913693]	3.54686
Galnt12	No description	3.53505
Stx1b	syntaxin 1B [Source:MGI Symbol;Acc:MGI:1930705]	3.52693
Tmem59l	transmembrane protein 59-like [Source:MGI Symbol;Acc:MGI:1915187]	3.52128
4930523C07Rik	RIKEN cDNA 4930523C07 gene [Source:MGI Symbol;Acc:MGI:1914897]	3.51141
Spr-ps1	sepiapterin reductase pseudogene 1 [Source:MGI Symbol;Acc:MGI:1345187]	3.5054
Nsg1	syntaxin 18 [Source:MGI Symbol;Acc:MGI:1918366]	3.50199
Vasn	coronin 7 [Source:MGI Symbol;Acc:MGI:1926135]	3.49629
Zp1	zona pellucida glycoprotein 1 [Source:MGI Symbol;Acc:MGI:103073]	3.49354
Clcn2	family with sequence similarity 131, member A [Source:MGI Symbol;Acc:MGI:1925658]	3.4855
Tnnt3	predicted gene 14492 [Source:MGI Symbol;Acc:MGI:3642289]	3.47389
Rnase4	ribonuclease, RNase A family 4 [Source:MGI Symbol;Acc:MGI:1926217]	3.47332
Slc16a2	solute carrier family 16 (monocarboxylic acid transporters), member 2 [Source:MGI Symbol;Acc:MGI:1203732]	3.46366
Cyp4f16	cytochrome P450, family 4, subfamily f, polypeptide 16 [Source:MGI Symbol;Acc:MGI:1917351]	3.46226
Acvrl1	activin A receptor, type II-like 1 [Source:MGI Symbol;Acc:MGI:1338946]	3.45889
Def6	differentially expressed in FDCP 6 [Source:MGI Symbol;Acc:MGI:1346328]	3.44996
Fbxo32	F-box protein 32 [Source:MGI Symbol;Acc:MGI:1914981]	3.44616
Mid2	midline 2 [Source:MGI Symbol;Acc:MGI:1344333]	3.42751
Spr	sepiapterin reductase [Source:MGI Symbol;Acc:MGI:103078]	3.42449
Ak1	adenylate kinase 1 [Source:MGI Symbol;Acc:MGI:87977]	3.42028
Spsb1	splA/ryanodine receptor domain and SOCS box containing 1 [Source:MGI Symbol;Acc:MGI:1921896]	3.41899
Spnb3	spectrin beta 3 [Source:MGI Symbol;Acc:MGI:1313261]	3.40742
Cdsn	corneodesmosin [Source:MGI Symbol;Acc:MGI:3505689]	3.40308
Gm684	predicted gene 684 [Source:MGI Symbol;Acc:MGI:2685530]	3.38933
Prl4a1	prolactin family 4, subfamily a, member 1 [Source:MGI Symbol;Acc:MGI:1206587]	3.36816
Klk4	kallikrein related-peptidase 4 (prostase, enamel matrix, prostate) [Source:MGI Symbol;Acc:MGI:1861379]	3.36667
Gstm1	glutathione S-transferase, mu 1 [Source:MGI Symbol;Acc:MGI:95860]	3.36374
Tnnt2	troponin T2, cardiac [Source:MGI Symbol;Acc:MGI:104597]	3.36306
Rab7l1	RAB7, member RAS oncogene family-like 1 [Source:MGI Symbol;Acc:MGI:2385107]	3.35061
P2rx5	purinergic receptor P2X, ligand-gated ion channel, 5 [Source:MGI Symbol;Acc:MGI:2137026]	3.33921
Sema4f	sema domain, immunoglobulin domain (Ig), TM domain, and short cytoplasmic domain [Source:MGI Symbol;Acc:MGI:1340055]	3.32839
Btbd11	BTB (POZ) domain containing 11 [Source:MGI Symbol;Acc:MGI:1921257]	3.32759
Eng	adenylate kinase 1 [Source:MGI Symbol;Acc:MGI:87977]	3.32743
9030224M15Rik	RIKEN cDNA 9030224M15 gene [Source:MGI Symbol;Acc:MGI:3045338]	3.32488
Cacna1g	calcium channel, voltage-dependent, T type, alpha 1G subunit [Source:MGI Symbol;Acc:MGI:1201678]	3.32369
Srcin1	SRC kinase signaling inhibitor 1 [Source:MGI Symbol;Acc:MGI:1933179]	3.31711
Hpdl	4-hydroxyphenylpyruvate dioxygenase-like [Source:MGI Symbol;Acc:MGI:2444646]	3.3024
Cdkl5	retinoschisis (X-linked, juvenile) 1 (human) [Source:MGI Symbol;Acc:MGI:1336189]	3.29753
Mmp23	matrix metallopeptidase 23 [Source:MGI Symbol;Acc:MGI:1347361]	3.2923
Ano1	anoctamin 1, calcium activated chloride channel [Source:MGI Symbol;Acc:MGI:2142149]	3.28615
Gm221	predicted gene 221 [Source:MGI Symbol;Acc:MGI:2685067]	3.28394
Cyth4	cytohesin 4 [Source:MGI Symbol;Acc:MGI:2441702]	3.28011
Mxd4	Max dimerization protein 4 [Source:MGI Symbol;Acc:MGI:104991]	3.27983
Kcnb1	potassium voltage gated channel, Shab-related subfamily, member 1 [Source:MGI Symbol;Acc:MGI:96666]	3.2759
Thnsl2	threonine synthase-like 2 (bacterial) [Source:MGI Symbol;Acc:MGI:3041254]	3.27086
Sema6b	sema domain, transmembrane domain (TM), and cytoplasmic domain, (semaphorin) 6B [Source:MGI Symbol;Acc:MGI:1202889]	3.26613
Mlxipl	MLX interacting protein-like [Source:MGI Symbol;Acc:MGI:1927999]	3.26473
Dnaja4	DnaJ (Hsp40) homolog, subfamily A, member 4 [Source:MGI Symbol;Acc:MGI:1927638]	3.26361
Prkd1	protein kinase D1 [Source:MGI Symbol;Acc:MGI:99879]	3.25534
Bhlhe41	basic helix-loop-helix family, member e41 [Source:MGI Symbol;Acc:MGI:1930704]	3.24063
Ccne1	cyclin E1 [Source:MGI Symbol;Acc:MGI:88316]	3.2367
Tnfrsf11a	tumor necrosis factor receptor superfamily, member 11a [Source:MGI Symbol;Acc:MGI:1314891]	3.23655
Abca3	ATP-binding cassette, sub-family A (ABC1), member 3 [Source:MGI Symbol;Acc:MGI:1351617]	3.23374
Slc16a13	solute carrier family 16 (monocarboxylic acid transporters), member 13 [Source:MGI Symbol;Acc:MGI:1916559]	3.22388
Mpp2	membrane protein, palmitoylated 2 (MAGUK p55 subfamily member 2) [Source:MGI Symbol;Acc:MGI:1858257]	3.22079
Pdzrn3	PDZ domain containing RING finger 3 [Source:MGI Symbol;Acc:MGI:1933157]	3.21513
Muc4	mucin 4 [Source:MGI Symbol;Acc:MGI:2153525]	3.19929
Grasp	GRP1 (general receptor for phosphoinositides 1)-associated scaffold protein [Source:MGI Symbol;Acc:MGI:1860303]	3.19477
Pla2g16	phospholipase A2, group XVI [Source:MGI Symbol;Acc:MGI:2179715]	3.18041
Cd200	CD200 antigen [Source:MGI Symbol;Acc:MGI:1196990]	3.17804
Sim2	single-minded homolog 2 (Drosophila) [Source:MGI Symbol;Acc:MGI:98307]	3.17203
2010300C02Rik	RIKEN cDNA 2010300C02 gene [Source:MGI Symbol;Acc:MGI:1919347]	3.17112
Slc26a7	solute carrier family 26, member 7 [Source:MGI Symbol;Acc:MGI:2384791]	3.16406
En1	engrailed 1 [Source:MGI Symbol;Acc:MGI:95389]	3.16257
Lypd6	LY6/PLAUR domain containing 6 [Source:MGI Symbol;Acc:MGI:2443848]	3.16079
Dnm1	dynamin 1 [Source:MGI Symbol;Acc:MGI:107384]	3.14499
Icam5	intercellular adhesion molecule 5, telencephalin [Source:MGI Symbol;Acc:MGI:109430]	3.14289
Mettl7a1	methyltransferase like 7A1 [Source:MGI Symbol;Acc:MGI:1916523]	3.13924
Spnb5	spectrin beta 5 [Source:MGI Symbol;Acc:MGI:2685200]	3.13663
Stx11	syntaxin 11 [Source:MGI Symbol;Acc:MGI:1921982]	3.13247
Sfn	stratifin [Source:MGI Symbol;Acc:MGI:1891831]	3.13178
5730409E04Rik	RIKEN cDNA 5730409E04Rik gene [Source:MGI Symbol;Acc:MGI:3609248]	3.13164
Gm6091	predicted pseudogene 6091 [Source:MGI Symbol;Acc:MGI:3648068]	3.12998
Slc29a4	solute carrier family 29 (nucleoside transporters), member 4 [Source:MGI Symbol;Acc:MGI:2385330]	3.12955
Adora2b	adenosine A2b receptor [Source:MGI Symbol;Acc:MGI:99403]	3.12821
Scn4b	sodium channel, type IV, beta [Source:MGI Symbol;Acc:MGI:2687406]	3.1181
Cbx7	apolipoprotein B mRNA editing enzyme, catalytic polypeptide 3 [Source:MGI Symbol;Acc:MGI:1933111]	3.11679
Lama1	laminin, alpha 1 [Source:MGI Symbol;Acc:MGI:99892]	3.11639
Col20a1	collagen, type XX, alpha 1 [Source:MGI Symbol;Acc:MGI:1920618]	3.11453
Slc16a5	predicted gene 11695 [Source:MGI Symbol;Acc:MGI:3649841]	3.11421
Rarres2	leucine rich repeat containing 61 [Source:MGI Symbol;Acc:MGI:2652848]	3.11104
Tk1	predicted gene 20708 [Source:MGI Symbol;Acc:MGI:5313155]	3.10378
Fam78a	nucleoporin 214 [Source:MGI Symbol;Acc:MGI:1095411]	3.0992
Iffo1	intermediate filament family orphan 1 [Source:MGI Symbol;Acc:MGI:2444516]	3.09679
Prr13	proline rich 13 [Source:MGI Symbol;Acc:MGI:1913401]	3.09339
Sesn3	sestrin 3 [Source:MGI Symbol;Acc:MGI:1922997]	3.09137
Wnt3	wingless-related MMTV integration site 3 [Source:MGI Symbol;Acc:MGI:98955]	3.09133
Dcxr	dicarbonyl L-xylulose reductase [Source:MGI Symbol;Acc:MGI:1915130]	3.07883
Muc1	mucin 1, transmembrane [Source:MGI Symbol;Acc:MGI:97231]	3.07836
Cxcr2	chemokine (C-X-C motif) receptor 2 [Source:MGI Symbol;Acc:MGI:105303]	3.07472
Tfpi	tissue factor pathway inhibitor [Source:MGI Symbol;Acc:MGI:1095418]	3.07292
Prickle2	prickle homolog 2 (Drosophila) [Source:MGI Symbol;Acc:MGI:1925144]	3.0716
Il17rc	interleukin 17 receptor C [Source:MGI Symbol;Acc:MGI:2159336]	3.06942
Hdhd3	haloacid dehalogenase-like hydrolase domain containing 3 [Source:MGI Symbol;Acc:MGI:1919998]	3.06879
Stat1	signal transducer and activator of transcription 1 [Source:MGI Symbol;Acc:MGI:103063]	3.06853
Zmat1	zinc finger, matrin type 1 [Source:MGI Symbol;Acc:MGI:2442284]	3.06292
Wdr66	WD repeat domain 66 [Source:MGI Symbol;Acc:MGI:1918495]	3.05758
Aldh1l1	aldehyde dehydrogenase 1 family, member L1 [Source:MGI Symbol;Acc:MGI:1340024]	3.04836
B4galnt3	beta-1,4-N-acetyl-galactosaminyl transferase 3 [Source:MGI Symbol;Acc:MGI:3041155]	3.04283
Mocos	molybdenum cofactor sulfurase [Source:MGI Symbol;Acc:MGI:1915841]	3.03999
Nod1	nucleotide-binding oligomerization domain containing 1 [Source:MGI Symbol;Acc:MGI:1341839]	3.03909
Apba2	amyloid beta (A4) precursor protein-binding, family A, member 2 [Source:MGI Symbol;Acc:MGI:1261791]	3.03511
Htra3	HtrA serine peptidase 3 [Source:MGI Symbol;Acc:MGI:1925808]	3.03173
Gm11695	predicted gene 11695 [Source:MGI Symbol;Acc:MGI:3649841]	3.03172
Sned1	sushi, nidogen and EGF-like domains 1 [Source:MGI Symbol;Acc:MGI:3045960]	3.03098
Mdga1	MAM domain containing glycosylphosphatidylinositol anchor 1 [Source:MGI Symbol;Acc:MGI:1922012]	3.02166
Grb7	growth factor receptor bound protein 7 [Source:MGI Symbol;Acc:MGI:102683]	3.02071
A030009H04Rik	RIKEN cDNA A030009H04 gene [Source:MGI Symbol;Acc:MGI:1915359]	3.02011
Kcns3	potassium voltage-gated channel, delayed-rectifier, subfamily S, member 3 [Source:MGI Symbol;Acc:MGI:1098804]	3.02003
Coro2a	predicted gene, 16731 [Source:MGI Symbol;Acc:MGI:4439655]	3.01596
Dixdc1	DIX domain containing 1 [Source:MGI Symbol;Acc:MGI:2679721]	3.01112
Stat2	signal transducer and activator of transcription 2 [Source:MGI Symbol;Acc:MGI:103039]	3.00919
Adam15	a disintegrin and metallopeptidase domain 15 (metargidin) [Source:MGI Symbol;Acc:MGI:1333882]	3.00782
Tcea3	transcription elongation factor A (SII), 3 [Source:MGI Symbol;Acc:MGI:1196908]	3.0035
Sec14l2	SEC14-like 2 (S. cerevisiae) [Source:MGI Symbol;Acc:MGI:1915065]	3.00055
Igf2bp3	RIKEN cDNA 2410003K15 gene [Source:MGI Symbol;Acc:MGI:1922843]	2.9986
Ppapdc3	phosphatidic acid phosphatase type 2 domain containing 3 [Source:MGI Symbol;Acc:MGI:2445183]	2.99507
Cmtm5	CKLF-like MARVEL transmembrane domain containing 5 [Source:MGI Symbol;Acc:MGI:2447164]	2.99478
Garnl3	GTPase activating RANGAP domain-like 3 [Source:MGI Symbol;Acc:MGI:2139309]	2.99297
Pax3	paired box gene 3 [Source:MGI Symbol;Acc:MGI:97487]	2.99074
Ifitm3	interferon induced transmembrane protein 3 [Source:MGI Symbol;Acc:MGI:1913391]	2.98982
Spc25	SPC25, NDC80 kinetochore complex component, homolog (S. cerevisiae) [Source:MGI Symbol;Acc:MGI:1913692]	2.98143
Eps8l1	predicted gene 15494 [Source:MGI Symbol;Acc:MGI:3782940]	2.96165
Prtg	protogenin homolog (Gallus gallus) [Source:MGI Symbol;Acc:MGI:2444710]	2.9596
Prl6a1	prolactin family 6, subfamily a, member 1 [Source:MGI Symbol;Acc:MGI:1206579]	2.95366
Glis3	GLIS family zinc finger 3 [Source:MGI Symbol;Acc:MGI:2444289]	2.95332
Ctsj	cathepsin J [Source:MGI Symbol;Acc:MGI:1349426]	2.95045
C530028O21Rik	RIKEN cDNA C530028O21 gene [Source:MGI Symbol;Acc:MGI:2441908]	2.95005
Nfkbie	nuclear factor of kappa light polypeptide gene enhancer in B cells inhibitor, epsilon [Source:MGI Symbol;Acc:MGI:1194908]	2.94747
Nme4	NME/NM23 nucleoside diphosphate kinase 4 [Source:MGI Symbol;Acc:MGI:1931148]	2.94527
Madd	MAP-kinase activating death domain [Source:MGI Symbol;Acc:MGI:2444672]	2.94299
Fam65c	family with sequence similarity 65, member C [Source:MGI Symbol;Acc:MGI:1916803]	2.94265
Aplf	aprataxin and PNKP like factor [Source:MGI Symbol;Acc:MGI:1919353]	2.93753
Pik3r5	phosphoinositide-3-kinase, regulatory subunit 5, p101 [Source:MGI Symbol;Acc:MGI:2443588]	2.93395
Mest	mesoderm specific transcript [Source:MGI Symbol;Acc:MGI:96968]	2.92165
Cchcr1	coiled-coil alpha-helical rod protein 1 [Source:MGI Symbol;Acc:MGI:2385321]	2.91707
Lrrc3	leucine rich repeat containing 3 [Source:MGI Symbol;Acc:MGI:2447899]	2.91458
Apc2	adenomatosis polyposis coli 2 [Source:MGI Symbol;Acc:MGI:1346052]	2.91134
Dopey2	dopey family member 2 [Source:MGI Symbol;Acc:MGI:1917278]	2.90553
Defb22	defensin beta 22 [Source:MGI Symbol;Acc:MGI:3045368]	2.90392
Rab11fip5	RAB11 family interacting protein 5 (class I) [Source:MGI Symbol;Acc:MGI:1098586]	2.90024
Gm11110	predicted gene 11110 [Source:MGI Symbol;Acc:MGI:3779362]	2.89429
Vnn1	vanin 1 [Source:MGI Symbol;Acc:MGI:108395]	2.89038
Hpn	hepsin [Source:MGI Symbol;Acc:MGI:1196620]	2.8841
Tram1l1	translocation associated membrane protein 1-like 1 [Source:MGI Symbol;Acc:MGI:2443503]	2.88328
Nmi	N-myc (and STAT) interactor [Source:MGI Symbol;Acc:MGI:1928368]	2.88293
Abhd15	transformation related protein 53 inducible protein 13 [Source:MGI Symbol;Acc:MGI:1915125]	2.88261
Prps2	phosphoribosyl pyrophosphate synthetase 2 [Source:MGI Symbol;Acc:MGI:97776]	2.88084
Hpgd	hydroxyprostaglandin dehydrogenase 15 (NAD) [Source:MGI Symbol;Acc:MGI:108085]	2.87938
Sarm1	sterile alpha and HEAT/Armadillo motif containing 1 [Source:MGI Symbol;Acc:MGI:2136419]	2.87378
Col5a3	collagen, type V, alpha 3 [Source:MGI Symbol;Acc:MGI:1858212]	2.87067
Crip2	cysteine rich protein 2 [Source:MGI Symbol;Acc:MGI:1915587]	2.86032
Dmbx1	diencephalon/mesencephalon homeobox 1 [Source:MGI Symbol;Acc:MGI:2153518]	2.85822
Scx	block of proliferation 1 [Source:MGI Symbol;Acc:MGI:1334460]	2.85031
Bmp8a	bone morphogenetic protein 8a [Source:MGI Symbol;Acc:MGI:104515]	2.84716
Parp3	poly (ADP-ribose) polymerase family, member 3 [Source:MGI Symbol;Acc:MGI:1891258]	2.8457
Elmo3	engulfment and cell motility 3, ced-12 homolog (C. elegans) [Source:MGI Symbol;Acc:MGI:2679007]	2.84492
Nipal4	NIPA-like domain containing 4 [Source:MGI Symbol;Acc:MGI:2444671]	2.83889
Sgk1	serum/glucocorticoid regulated kinase 1 [Source:MGI Symbol;Acc:MGI:1340062]	2.83062
Mfi2	antigen p97 (melanoma associated) identified by monoclonal antibodies 133.2 and 96.5 [Source:MGI Symbol;Acc:MGI:1353421]	2.82553
Ggct	gamma-glutamyl cyclotransferase [Source:MGI Symbol;Acc:MGI:95700]	2.82227
Cd68	CD68 antigen [Source:MGI Symbol;Acc:MGI:88342]	2.82189
Slc46a1	solute carrier family 46, member 1 [Source:MGI Symbol;Acc:MGI:1098733]	2.82047
Gss	acyl-CoA synthetase short-chain family member 2 [Source:MGI Symbol;Acc:MGI:1890410]	2.81996
Gnai1	guanine nucleotide binding protein (G protein), alpha inhibiting 1 [Source:MGI Symbol;Acc:MGI:95771]	2.81913
Prex1	No description	2.81855
2410012M07Rik	RIKEN cDNA 2410012M07 gene [Source:MGI Symbol;Acc:MGI:1919229]	2.81449
Rhpn1	rhophilin, Rho GTPase binding protein 1 [Source:MGI Symbol;Acc:MGI:1098783]	2.81407
Tapbp	TAP binding protein [Source:MGI Symbol;Acc:MGI:1201689]	2.81393
Bmp7	bone morphogenetic protein 7 [Source:MGI Symbol;Acc:MGI:103302]	2.811
Gtdc2	glycosyltransferase-like domain containing 2 [Source:MGI Symbol;Acc:MGI:2143424]	2.80747
Ripply3	ripply3 homolog (zebrafish) [Source:MGI Symbol;Acc:MGI:2181192]	2.80548
Fam40b	family with sequence similarity 40, member B [Source:MGI Symbol;Acc:MGI:2444363]	2.80546
Man1a	mannosidase 1, alpha [Source:MGI Symbol;Acc:MGI:104677]	2.80438
Abcc3	ATP-binding cassette, sub-family C (CFTR/MRP), member 3 [Source:MGI Symbol;Acc:MGI:1923658]	2.79815
Mapkapk3	mitogen-activated protein kinase-activated protein kinase 3 [Source:MGI Symbol;Acc:MGI:2143163]	2.79554
Dusp2	dual specificity phosphatase 2 [Source:MGI Symbol;Acc:MGI:101911]	2.79436
Aldoc	aldolase C, fructose-bisphosphate [Source:MGI Symbol;Acc:MGI:101863]	2.79359
Kcnc3	potassium voltage gated channel, Shaw-related subfamily, member 3 [Source:MGI Symbol;Acc:MGI:96669]	2.79256
Fam46b	predicted gene 13257 [Source:MGI Symbol;Acc:MGI:3651057]	2.79128
Cdkn1a	cyclin-dependent kinase inhibitor 1A (P21) [Source:MGI Symbol;Acc:MGI:104556]	2.78993
Retsat	retinol saturase (all trans retinol 13,14 reductase) [Source:MGI Symbol;Acc:MGI:1914692]	2.78227
Sall3	sal-like 3 (Drosophila) [Source:MGI Symbol;Acc:MGI:109295]	2.78082
Socs1	suppressor of cytokine signaling 1 [Source:MGI Symbol;Acc:MGI:1354910]	2.76875
Parp10	plectin [Source:MGI Symbol;Acc:MGI:1277961]	2.76454
Ablim2	actin-binding LIM protein 2 [Source:MGI Symbol;Acc:MGI:2385758]	2.76228
Mtap7d2	MAP7 domain containing 2 [Source:MGI Symbol;Acc:MGI:1917474]	2.76222
Khdrbs3	KH domain containing, RNA binding, signal transduction associated 3 [Source:MGI Symbol;Acc:MGI:1313312]	2.76112
3110003A17Rik	RIKEN cDNA 3110003A17 gene [Source:MGI Symbol;Acc:MGI:1920362]	2.75791
Dexi	dexamethasone-induced transcript [Source:MGI Symbol;Acc:MGI:1926236]	2.7571
Tmem125	transmembrane protein 125 [Source:MGI Symbol;Acc:MGI:1923409]	2.75539
Scnn1a	sodium channel, nonvoltage-gated 1 alpha [Source:MGI Symbol;Acc:MGI:101782]	2.74536
Cpsf4l	cleavage and polyadenylation specific factor 4-like [Source:MGI Symbol;Acc:MGI:1277182]	2.74459
Alpl	alkaline phosphatase, liver/bone/kidney [Source:MGI Symbol;Acc:MGI:87983]	2.74273
Olfml2b	olfactomedin-like 2B [Source:MGI Symbol;Acc:MGI:2443310]	2.73863
Hes6	hairy and enhancer of split 6 (Drosophila) [Source:MGI Symbol;Acc:MGI:1859852]	2.73719
Slc25a10	predicted gene 11788 [Source:MGI Symbol;Acc:MGI:3649943]	2.737
Galnt6	No description	2.73642
Taf7l	TAF7-like RNA polymerase II, TATA box binding protein (TBP)-associated factor [Source:MGI Symbol;Acc:MGI:1921719]	2.73562
Maged2	melanoma antigen, family D, 2 [Source:MGI Symbol;Acc:MGI:1933391]	2.73477
Il1rap	interleukin 1 receptor accessory protein [Source:MGI Symbol;Acc:MGI:104975]	2.73291
Sel1l3	sel-1 suppressor of lin-12-like 3 (C. elegans) [Source:MGI Symbol;Acc:MGI:1916941]	2.73132
Uqcrh	ubiquinol-cytochrome c reductase hinge protein [Source:MGI Symbol;Acc:MGI:1913826]	2.72896
Smpdl3b	sphingomyelin phosphodiesterase, acid-like 3B [Source:MGI Symbol;Acc:MGI:1916022]	2.72053
Pip5k1b	phosphatidylinositol-4-phosphate 5-kinase, type 1 beta [Source:MGI Symbol;Acc:MGI:107930]	2.71563
Nxn	nucleoredoxin [Source:MGI Symbol;Acc:MGI:109331]	2.71437
Unc5cl	unc-5 homolog C (C. elegans)-like [Source:MGI Symbol;Acc:MGI:1923839]	2.7098
Rcsd1	RCSD domain containing 1 [Source:MGI Symbol;Acc:MGI:2676394]	2.7075
Psmb8	proteasome (prosome, macropain) subunit, beta type 8 (large multifunctional peptidase 7) [Source:MGI Symbol;Acc:MGI:1346527]	2.7061
1810037I17Rik	RIKEN cDNA 1810037I17 gene [Source:MGI Symbol;Acc:MGI:1914954]	2.70488
Ahr	aryl-hydrocarbon receptor [Source:MGI Symbol;Acc:MGI:105043]	2.70398
Tagln	proprotein convertase subtilisin/kexin type 7 [Source:MGI Symbol;Acc:MGI:107421]	2.70317
Me1	malic enzyme 1, NADP(+)-dependent, cytosolic [Source:MGI Symbol;Acc:MGI:97043]	2.69937
Eomes	eomesodermin homolog (Xenopus laevis) [Source:MGI Symbol;Acc:MGI:1201683]	2.69731
Micall2	MICAL-like 2 [Source:MGI Symbol;Acc:MGI:2444818]	2.69711
Ano8	DET1 and DDB1 associated 1 [Source:MGI Symbol;Acc:MGI:1913748]	2.68613
H2-D1	histocompatibility 2, D region locus 1 [Source:MGI Symbol;Acc:MGI:95896]	2.6839
6530418L21Rik	RIKEN cDNA 6530418L21 gene [Source:MGI Symbol;Acc:MGI:1923497]	2.67935
Hspa1b	heat shock protein 1B [Source:MGI Symbol;Acc:MGI:99517]	2.6779
1500009L16Rik	RIKEN cDNA 1500009L16 gene [Source:MGI Symbol;Acc:MGI:1917034]	2.67343
Sepx1	selenoprotein X 1 [Source:MGI Symbol;Acc:MGI:1351642]	2.6655
Fbln7	fibulin 7 [Source:MGI Symbol;Acc:MGI:1917620]	2.66548
Rims4	regulating synaptic membrane exocytosis 4 [Source:MGI Symbol;Acc:MGI:2674366]	2.6642
Myo7a	myosin VIIA [Source:MGI Symbol;Acc:MGI:104510]	2.66054
Sulf2	nuclear receptor coactivator 3 [Source:MGI Symbol;Acc:MGI:1276535]	2.65953
AC162446.1	uncharacterized protein LOC100502950 precursor [Source:RefSeq peptide;Acc:NP_001182182]	2.65618
Ankle1	ankyrin repeat and LEM domain containing 1 [Source:MGI Symbol;Acc:MGI:1918775]	2.6552
Gstm7	glutathione S-transferase, mu 7 [Source:MGI Symbol;Acc:MGI:1915562]	2.65502
Ankrd13b	ankyrin repeat domain 13b [Source:MGI Symbol;Acc:MGI:2144501]	2.65238
Cnksr1	connector enhancer of kinase suppressor of Ras 1 [Source:MGI Symbol;Acc:MGI:2670958]	2.65229
Slc41a3	solute carrier family 41, member 3 [Source:MGI Symbol;Acc:MGI:1918949]	2.65094
Fhl1	four and a half LIM domains 1 [Source:MGI Symbol;Acc:MGI:1298387]	2.64944
Hs3st1	heparan sulfate (glucosamine) 3-O-sulfotransferase 1 [Source:MGI Symbol;Acc:MGI:1201606]	2.64696
Rgl3	ral guanine nucleotide dissociation stimulator-like 3 [Source:MGI Symbol;Acc:MGI:1918996]	2.64106
Trpm6	transient receptor potential cation channel, subfamily M, member 6 [Source:MGI Symbol;Acc:MGI:2675603]	2.63611
Sfrp1	secreted frizzled-related protein 1 [Source:MGI Symbol;Acc:MGI:892014]	2.63305
Mapk13	mitogen-activated protein kinase 13 [Source:MGI Symbol;Acc:MGI:1346864]	2.63036
2610528J11Rik	RIKEN cDNA 2610528J11 gene [Source:MGI Symbol;Acc:MGI:1913701]	2.62773
Cpt1a	carnitine palmitoyltransferase 1a, liver [Source:MGI Symbol;Acc:MGI:1098296]	2.62634
Npr2	predicted gene 12473 [Source:MGI Symbol;Acc:MGI:3652337]	2.62618
Selm	selenoprotein M [Source:MGI Symbol;Acc:MGI:2149786]	2.62592
Abcb1a	ATP-binding cassette, sub-family B (MDR/TAP), member 1A [Source:MGI Symbol;Acc:MGI:97570]	2.62585
Naglu	alpha-N-acetylglucosaminidase (Sanfilippo disease IIIB) [Source:MGI Symbol;Acc:MGI:1351641]	2.62261
Galt	interleukin 11 receptor, alpha chain 1 [Source:MGI Symbol;Acc:MGI:107426]	2.61513
Cyp11a1	cytochrome P450, family 11, subfamily a, polypeptide 1 [Source:MGI Symbol;Acc:MGI:88582]	2.60906
Serpine2	serine (or cysteine) peptidase inhibitor, clade E, member 2 [Source:MGI Symbol;Acc:MGI:101780]	2.60755
Rgs11	Rho GDP dissociation inhibitor (GDI) gamma [Source:MGI Symbol;Acc:MGI:108430]	2.60748
4833442J19Rik	RIKEN cDNA 4833442J19 gene [Source:MGI Symbol;Acc:MGI:2443575]	2.59965
Syp	synaptophysin [Source:MGI Symbol;Acc:MGI:98467]	2.5943
Neurl1b	neuralized homolog 1b (Drosophila) [Source:MGI Symbol;Acc:MGI:3643092]	2.59373
Tmc8	transmembrane channel-like gene family 6 [Source:MGI Symbol;Acc:MGI:1098686]	2.59322
Dnase2a	deoxyribonuclease II alpha [Source:MGI Symbol;Acc:MGI:1329019]	2.5903
Fdxr	ferredoxin reductase [Source:MGI Symbol;Acc:MGI:104724]	2.58488
Dpysl5	dihydropyrimidinase-like 5 [Source:MGI Symbol;Acc:MGI:1929772]	2.58194
Susd2	sushi domain containing 2 [Source:MGI Symbol;Acc:MGI:1918983]	2.57804
H2-T24	RIKEN cDNA A930015D03 gene [Source:MGI Symbol;Acc:MGI:1925060]	2.5777
Iqsec2	IQ motif and Sec7 domain 2 [Source:MGI Symbol;Acc:MGI:3528396]	2.57607
Slc16a12	solute carrier family 16 (monocarboxylic acid transporters), member 12 [Source:MGI Symbol;Acc:MGI:2147716]	2.57598
Foxf1a	predicted gene 20388 [Source:MGI Symbol;Acc:MGI:5141853]	2.57579
Enpp4	ectonucleotide pyrophosphatase/phosphodiesterase 4 [Source:MGI Symbol;Acc:MGI:2682634]	2.57448
Sh3rf2	SH3 domain containing ring finger 2 [Source:MGI Symbol;Acc:MGI:2444628]	2.57446
Sectm1a	secreted and transmembrane 1A [Source:MGI Symbol;Acc:MGI:2384805]	2.57431
Notch1	RIKEN cDNA 0610009E02 gene [Source:MGI Symbol;Acc:MGI:3698435]	2.57155
Fgf13	fibroblast growth factor 13 [Source:MGI Symbol;Acc:MGI:109178]	2.57117
Arl4d	ADP-ribosylation factor-like 4D [Source:MGI Symbol;Acc:MGI:1933155]	2.56368
Eif2ak2	eukaryotic translation initiation factor 2-alpha kinase 2 [Source:MGI Symbol;Acc:MGI:1353449]	2.56336
Cilp2	cartilage intermediate layer protein 2 [Source:MGI Symbol;Acc:MGI:1915959]	2.56103
Ccdc33	coiled-coil domain containing 33 [Source:MGI Symbol;Acc:MGI:1922464]	2.56023
E130102H24Rik	RIKEN cDNA E130102H24 gene [Source:MGI Symbol;Acc:MGI:1925116]	2.56007
Hs3st3b1	heparan sulfate (glucosamine) 3-O-sulfotransferase 3B1 [Source:MGI Symbol;Acc:MGI:1333853]	2.55894
Fam125b	family with sequence similarity 125, member B [Source:MGI Symbol;Acc:MGI:1919793]	2.55259
AI429214	expressed sequence AI429214 [Source:MGI Symbol;Acc:MGI:2142538]	2.55245
Cda	cytidine deaminase [Source:MGI Symbol;Acc:MGI:1919519]	2.54569
Zfp185	zinc finger protein 185 [Source:MGI Symbol;Acc:MGI:108095]	2.54523
Ddt	D-dopachrome tautomerase [Source:MGI Symbol;Acc:MGI:1298381]	2.54301
Tmem8	transmembrane protein 8 (five membrane-spanning domains) [Source:MGI Symbol;Acc:MGI:1926283]	2.53277
Lrrc33	leucine rich repeat containing 33 [Source:MGI Symbol;Acc:MGI:2445095]	2.53115
Cacna1b	calcium channel, voltage-dependent, N type, alpha 1B subunit [Source:MGI Symbol;Acc:MGI:88296]	2.53105
Gstm2	glutathione S-transferase, mu 2 [Source:MGI Symbol;Acc:MGI:95861]	2.53086
Tmem102	transmembrane protein 102 [Source:MGI Symbol;Acc:MGI:1921591]	2.53048
Foxa1	forkhead box A1 [Source:MGI Symbol;Acc:MGI:1347472]	2.52928
Kcnq1	potassium voltage-gated channel, subfamily Q, member 1 [Source:MGI Symbol;Acc:MGI:108083]	2.52637
Syt8	synaptotagmin VIII [Source:MGI Symbol;Acc:MGI:1859867]	2.52602
Cib2	SH2 domain containing 7 [Source:MGI Symbol;Acc:MGI:2441692]	2.52357
Pnrc1	proline-rich nuclear receptor coactivator 1 [Source:MGI Symbol;Acc:MGI:1917838]	2.52346
Podxl2	podocalyxin-like 2 [Source:MGI Symbol;Acc:MGI:2442488]	2.52084
Pla2g7	phospholipase A2, group VII (platelet-activating factor acetylhydrolase, plasma) [Source:MGI Symbol;Acc:MGI:1351327]	2.52045
Hspa1a	heat shock protein 1A [Source:MGI Symbol;Acc:MGI:96244]	2.51513
Ehd4	EH-domain containing 4 [Source:MGI Symbol;Acc:MGI:1919619]	2.51428
Grm4	glutamate receptor, metabotropic 4 [Source:MGI Symbol;Acc:MGI:1351341]	2.50603
Lsm3	LSM3 homolog, U6 small nuclear RNA associated (S. cerevisiae) [Source:MGI Symbol;Acc:MGI:1914928]	2.50061
Map3k9	mitogen-activated protein kinase kinase kinase 9 [Source:MGI Symbol;Acc:MGI:2449952]	2.49833
4933402E13Rik	RIKEN cDNA 4933402E13 gene [Source:MGI Symbol;Acc:MGI:1921687]	2.49619
CR555305.1	No description	2.49463
Cadm1	cell adhesion molecule 1 [Source:MGI Symbol;Acc:MGI:1889272]	2.49279
C1rl	complement component 1, r subcomponent-like [Source:MGI Symbol;Acc:MGI:2660692]	2.49193
Col11a1	collagen, type XI, alpha 1 [Source:MGI Symbol;Acc:MGI:88446]	2.48799
Eif4e3	predicted gene 20696 [Source:MGI Symbol;Acc:MGI:5313143]	2.48771
Gm6594	predicted pseudogene 6594 [Source:MGI Symbol;Acc:MGI:3643873]	2.48666
Oas1b	2'-5' oligoadenylate synthetase 1B [Source:MGI Symbol;Acc:MGI:97430]	2.48448
Xlr5a	X-linked lymphocyte-regulated 5A [Source:MGI Symbol;Acc:MGI:3574108]	2.47833
Kif9	kinesin family member 9 [Source:MGI Symbol;Acc:MGI:1098237]	2.47694
Ahnak2	AHNAK nucleoprotein 2 [Source:MGI Symbol;Acc:MGI:2144831]	2.47684
Dnajb5	DnaJ (Hsp40) homolog, subfamily B, member 5 [Source:MGI Symbol;Acc:MGI:1930018]	2.47625
Slc16a4	solute carrier family 16 (monocarboxylic acid transporters), member 4 [Source:MGI Symbol;Acc:MGI:2385183]	2.46682
Ggt1	gamma-glutamyltransferase 1 [Source:MGI Symbol;Acc:MGI:95706]	2.46636
Celf5	CUGBP, Elav-like family member 5 [Source:MGI Symbol;Acc:MGI:2442333]	2.46612
Celsr2	cadherin, EGF LAG seven-pass G-type receptor 2 (flamingo homolog, Drosophila) [Source:MGI Symbol;Acc:MGI:1858235]	2.46327
Pax9	predicted gene 15524 [Source:MGI Symbol;Acc:MGI:3782971]	2.46298
4930473A06Rik	RIKEN cDNA 4930473A06 gene [Source:MGI Symbol;Acc:MGI:1922152]	2.46276
Wdr72	WD repeat domain 72 [Source:MGI Symbol;Acc:MGI:3583957]	2.46228
Nfatc2	nuclear factor of activated T cells, cytoplasmic, calcineurin dependent 2 [Source:MGI Symbol;Acc:MGI:102463]	2.45983
Mal2	mal, T cell differentiation protein 2 [Source:MGI Symbol;Acc:MGI:2146021]	2.45799
Ifi30	interferon gamma inducible protein 30 [Source:MGI Symbol;Acc:MGI:2137648]	2.45738
Jam3	junction adhesion molecule 3 [Source:MGI Symbol;Acc:MGI:1933825]	2.4565
Il1r2	interleukin 1 receptor, type II [Source:MGI Symbol;Acc:MGI:96546]	2.44417
Tshz3	teashirt zinc finger family member 3 [Source:MGI Symbol;Acc:MGI:2442819]	2.44134
Hif3a	hypoxia inducible factor 3, alpha subunit [Source:MGI Symbol;Acc:MGI:1859778]	2.44082
Nfic	nuclear factor I/C [Source:MGI Symbol;Acc:MGI:109591]	2.43929
Deptor	predicted gene 9920 [Source:MGI Symbol;Acc:MGI:3642228]	2.43809
Gas7	growth arrest specific 7 [Source:MGI Symbol;Acc:MGI:1202388]	2.43789
Mast3	microtubule associated serine/threonine kinase 3 [Source:MGI Symbol;Acc:MGI:2683541]	2.43337
Xirp1	chemokine (C-X3-C) receptor 1 [Source:MGI Symbol;Acc:MGI:1333815]	2.43223
Naa38	N(alpha)-acetyltransferase 38, NatC auxiliary subunit [Source:MGI Symbol;Acc:MGI:1923772]	2.43008
Itpr3	inositol 1,4,5-triphosphate receptor 3 [Source:MGI Symbol;Acc:MGI:96624]	2.42737
Zdhhc14	zinc finger, DHHC domain containing 14 [Source:MGI Symbol;Acc:MGI:2653229]	2.42525
Wnt7a	wingless-related MMTV integration site 7A [Source:MGI Symbol;Acc:MGI:98961]	2.42501
Zfp595	zinc finger protein 595 [Source:MGI Symbol;Acc:MGI:3040707]	2.42453
Grid1	glutamate receptor, ionotropic, delta 1 [Source:MGI Symbol;Acc:MGI:95812]	2.4239
Ptpn18	protein tyrosine phosphatase, non-receptor type 18 [Source:MGI Symbol;Acc:MGI:108410]	2.42013
Syk	spleen tyrosine kinase [Source:MGI Symbol;Acc:MGI:99515]	2.41844
1700040I03Rik	RIKEN cDNA 1700040I03 gene [Source:MGI Symbol;Acc:MGI:1920577]	2.418
Ly75	lymphocyte antigen 75 [Source:MGI Symbol;Acc:MGI:106662]	2.41719
Bmp6	bone morphogenetic protein 6 [Source:MGI Symbol;Acc:MGI:88182]	2.41666
Trp53inp1	transformation related protein 53 inducible nuclear protein 1 [Source:MGI Symbol;Acc:MGI:1926609]	2.41556
Tmem50b	transmembrane protein 50B [Source:MGI Symbol;Acc:MGI:1925225]	2.41421
Gpd1l	glycerol-3-phosphate dehydrogenase 1-like [Source:MGI Symbol;Acc:MGI:1289257]	2.41325
A330049M08Rik	RIKEN cDNA A330049M08 gene [Source:MGI Symbol;Acc:MGI:2444888]	2.41287
Aifm3	apoptosis-inducing factor, mitochondrion-associated 3 [Source:MGI Symbol;Acc:MGI:1919418]	2.41157
Cd24a	CD24a antigen [Source:MGI Symbol;Acc:MGI:88323]	2.4097
Nrgn	neurogranin [Source:MGI Symbol;Acc:MGI:1927184]	2.40402
Akap5	A kinase (PRKA) anchor protein 5 [Source:MGI Symbol;Acc:MGI:2685104]	2.40199
4833417C18Rik	predicted gene 11527 [Source:MGI Symbol;Acc:MGI:3649799]	2.40087
Aoc3	amine oxidase, copper containing 3 [Source:MGI Symbol;Acc:MGI:1306797]	2.40013
Bdh1	3-hydroxybutyrate dehydrogenase, type 1 [Source:MGI Symbol;Acc:MGI:1919161]	2.3999
Rhod	ras homolog gene family, member D [Source:MGI Symbol;Acc:MGI:108446]	2.39908
C1s	complement component 1, s subcomponent [Source:MGI Symbol;Acc:MGI:1355312]	2.39756
Fkbp11	FK506 binding protein 11 [Source:MGI Symbol;Acc:MGI:1913370]	2.39599
Creb3l4	cAMP responsive element binding protein 3-like 4 [Source:MGI Symbol;Acc:MGI:1916603]	2.39581
Zfp296	zinc finger protein 296 [Source:MGI Symbol;Acc:MGI:1926956]	2.39189
Ccdc99	coiled-coil domain containing 99 [Source:MGI Symbol;Acc:MGI:1917635]	2.39133
Rab3a	RAB3A, member RAS oncogene family [Source:MGI Symbol;Acc:MGI:97843]	2.3895
Pdk3	pyruvate dehydrogenase kinase, isoenzyme 3 [Source:MGI Symbol;Acc:MGI:2384308]	2.38893
Pou2f3	POU domain, class 2, transcription factor 3 [Source:MGI Symbol;Acc:MGI:102565]	2.38879
Slc1a1	solute carrier family 1 (neuronal/epithelial high affinity glutamate transporter, system Xag), member 1 [Source:MGI Symbol;Acc:MGI:105083]	2.38755
1110058L19Rik	RIKEN cDNA 1110058L19 gene [Source:MGI Symbol;Acc:MGI:1915252]	2.38321
Smtnl2	smoothelin-like 2 [Source:MGI Symbol;Acc:MGI:2442764]	2.38044
Sbk1	SH3-binding kinase 1 [Source:MGI Symbol;Acc:MGI:2135937]	2.37823
Gsr	glutathione reductase [Source:MGI Symbol;Acc:MGI:95804]	2.37696
Tmtc2	transmembrane and tetratricopeptide repeat containing 2 [Source:MGI Symbol;Acc:MGI:1914057]	2.37342
Adora2a	adenosine A2a receptor [Source:MGI Symbol;Acc:MGI:99402]	2.37222
Gm20441	D-dopachrome tautomerase [Source:MGI Symbol;Acc:MGI:1298381]	2.3714
Tor3a	torsin family 3, member A [Source:MGI Symbol;Acc:MGI:1353652]	2.36994
Casp6	caspase 6 [Source:MGI Symbol;Acc:MGI:1312921]	2.3697
Sgsh	caspase recruitment domain family, member 14 [Source:MGI Symbol;Acc:MGI:2386258]	2.36876
Ecscr	RIKEN cDNA 1700066B19 gene [Source:MGI Symbol;Acc:MGI:1920699]	2.36863
Sdc2	syndecan 2 [Source:MGI Symbol;Acc:MGI:1349165]	2.36849
Fmnl3	formin-like 3 [Source:MGI Symbol;Acc:MGI:109569]	2.3644
Adar	adenosine deaminase, RNA-specific [Source:MGI Symbol;Acc:MGI:1889575]	2.36373
Tdrd7	tudor domain containing 7 [Source:MGI Symbol;Acc:MGI:2140279]	2.36296
Rfx5	regulatory factor X, 5 (influences HLA class II expression) [Source:MGI Symbol;Acc:MGI:1858421]	2.36178
Nkx6-1	NK6 homeobox 1 [Source:MGI Symbol;Acc:MGI:1206039]	2.35902
Sirpa	signal-regulatory protein alpha [Source:MGI Symbol;Acc:MGI:108563]	2.35852
BC029722	matrix metallopeptidase 24 [Source:MGI Symbol;Acc:MGI:1341867]	2.35836
Haghl	nuclear prelamin A recognition factor-like [Source:MGI Symbol;Acc:MGI:1914813]	2.35743
Rab43	RAB43, member RAS oncogene family [Source:MGI Symbol;Acc:MGI:1917084]	2.35702
Slc26a6	solute carrier family 26, member 6 [Source:MGI Symbol;Acc:MGI:2159728]	2.35532
Nxph3	neurexophilin 3 [Source:MGI Symbol;Acc:MGI:1336188]	2.35433
Mertk	c-mer proto-oncogene tyrosine kinase [Source:MGI Symbol;Acc:MGI:96965]	2.35385
Samd4	sterile alpha motif domain containing 4 [Source:MGI Symbol;Acc:MGI:1921730]	2.35327
Atp6v1e1	ATPase, H+ transporting, lysosomal V1 subunit E1 [Source:MGI Symbol;Acc:MGI:894326]	2.3501
Fads6	fatty acid desaturase domain family, member 6 [Source:MGI Symbol;Acc:MGI:3039592]	2.34968
Spon2	spondin 2, extracellular matrix protein [Source:MGI Symbol;Acc:MGI:1923724]	2.34773
Tuba4a	serine/threonine kinase 16 [Source:MGI Symbol;Acc:MGI:1313271]	2.34699
Unc5a	unc-5 homolog A (C. elegans) [Source:MGI Symbol;Acc:MGI:894682]	2.34358
Gm6055	predicted gene 6055 [Source:MGI Symbol;Acc:MGI:3648620]	2.34268
2010107E04Rik	RIKEN cDNA 2010107E04 gene [Source:MGI Symbol;Acc:MGI:1917507]	2.34217
Kcng1	potassium voltage-gated channel, subfamily G, member 1 [Source:MGI Symbol;Acc:MGI:3616086]	2.34147
Slc6a12	solute carrier family 6 (neurotransmitter transporter, betaine/GABA), member 12 [Source:MGI Symbol;Acc:MGI:95628]	2.34096
Tox2	TOX high mobility group box family member 2 [Source:MGI Symbol;Acc:MGI:3611233]	2.34057
Klk6	kallikrein related-peptidase 6 [Source:MGI Symbol;Acc:MGI:1343166]	2.33722
Rabl3	RAB, member of RAS oncogene family-like 3 [Source:MGI Symbol;Acc:MGI:1914907]	2.33488
Lpar2	lysophosphatidic acid receptor 2 [Source:MGI Symbol;Acc:MGI:1858422]	2.33349
D330028D13Rik	RIKEN cDNA D330028D13 gene [Source:MGI Symbol;Acc:MGI:2442161]	2.33297
2210020M01Rik	RecQ protein-like 5 [Source:MGI Symbol;Acc:MGI:2156841]	2.33209
Osmr	oncostatin M receptor [Source:MGI Symbol;Acc:MGI:1330819]	2.33034
Fmo5	flavin containing monooxygenase 5 [Source:MGI Symbol;Acc:MGI:1310004]	2.33027
Ankrd13d	ankyrin repeat domain 13 family, member D [Source:MGI Symbol;Acc:MGI:1915673]	2.32755
Cyp4f13	cytochrome P450, family 4, subfamily f, polypeptide 13 [Source:MGI Symbol;Acc:MGI:2158641]	2.32744
Lrrc16b	leucine rich repeat containing 16B [Source:MGI Symbol;Acc:MGI:2448573]	2.32655
Tspan17	tetraspanin 17 [Source:MGI Symbol;Acc:MGI:1921507]	2.32474
Gamt	guanidinoacetate methyltransferase [Source:MGI Symbol;Acc:MGI:1098221]	2.31929
Il17ra	interleukin 17 receptor A [Source:MGI Symbol;Acc:MGI:107399]	2.31666
Nav3	neuron navigator 3 [Source:MGI Symbol;Acc:MGI:2183703]	2.31542
Mlf1	predicted gene, 17402 [Source:MGI Symbol;Acc:MGI:4937036]	2.31412
8430419L09Rik	RIKEN cDNA 8430419L09 gene [Source:MGI Symbol;Acc:MGI:1921775]	2.31397
Stat6	signal transducer and activator of transcription 6 [Source:MGI Symbol;Acc:MGI:103034]	2.31172
Mgst3	microsomal glutathione S-transferase 3 [Source:MGI Symbol;Acc:MGI:1913697]	2.30748
Usp43	ubiquitin specific peptidase 43 [Source:MGI Symbol;Acc:MGI:2444541]	2.30549
Fam115c	family with sequence similarity 115, member C [Source:MGI Symbol;Acc:MGI:2385258]	2.30521
Chtf18	guanine nucleotide binding protein (G protein), gamma 13 [Source:MGI Symbol;Acc:MGI:1925616]	2.3049
Mdk	cholinergic receptor, muscarinic 4 [Source:MGI Symbol;Acc:MGI:88399]	2.3044
Aqp7	aquaporin 7 [Source:MGI Symbol;Acc:MGI:1314647]	2.30345
Gja4	gap junction protein, alpha 4 [Source:MGI Symbol;Acc:MGI:95715]	2.30011
D930015E06Rik	RIKEN cDNA D930015E06 gene [Source:MGI Symbol;Acc:MGI:2443399]	2.29905
Tnfrsf10b	tumor necrosis factor receptor superfamily, member 10b [Source:MGI Symbol;Acc:MGI:1341090]	2.29852
Psg22	pregnancy-specific glycoprotein 22 [Source:MGI Symbol;Acc:MGI:1891354]	2.29814
Nckipsd	NCK interacting protein with SH3 domain [Source:MGI Symbol;Acc:MGI:1931834]	2.29711
C330013F16Rik	RIKEN cDNA C330013F16 gene [Source:MGI Symbol;Acc:MGI:1925776]	2.29632
Mon1a	MON1 homolog A (yeast) [Source:MGI Symbol;Acc:MGI:1920075]	2.29511
Slc37a2	solute carrier family 37 (glycerol-3-phosphate transporter), member 2 [Source:MGI Symbol;Acc:MGI:1929693]	2.29505
Spns2	MYB binding protein (P160) 1a [Source:MGI Symbol;Acc:MGI:106181]	2.29496
2010011I20Rik	RIKEN cDNA 2010011I20 gene [Source:MGI Symbol;Acc:MGI:1914267]	2.29443
Rapgefl1	Rap guanine nucleotide exchange factor (GEF)-like 1 [Source:MGI Symbol;Acc:MGI:3611446]	2.29256
Nfam1	Nfat activating molecule with ITAM motif 1 [Source:MGI Symbol;Acc:MGI:1921289]	2.29199
Eya2	eyes absent 2 homolog (Drosophila) [Source:MGI Symbol;Acc:MGI:109341]	2.28568
Cdk5r1	cyclin-dependent kinase 5, regulatory subunit 1 (p35) [Source:MGI Symbol;Acc:MGI:101764]	2.285
Ptrh1	peptidyl-tRNA hydrolase 1 homolog (S. cerevisiae) [Source:MGI Symbol;Acc:MGI:1913779]	2.28216
Ndufb2	aarF domain containing kinase 2 [Source:MGI Symbol;Acc:MGI:1889336]	2.28207
Col5a1	RIKEN cDNA 2810430I11 gene [Source:MGI Symbol;Acc:MGI:3590515]	2.27907
Fdps	farnesyl diphosphate synthetase [Source:MGI Symbol;Acc:MGI:104888]	2.27685
Isyna1	myo-inositol 1-phosphate synthase A1 [Source:MGI Symbol;Acc:MGI:1919030]	2.27073
Tes	predicted gene 4876 [Source:MGI Symbol;Acc:MGI:3647654]	2.27035
Mocs1	predicted gene 20540 [Source:MGI Symbol;Acc:MGI:5142005]	2.27025
Tmem151b	t-complex-associated testis expressed 1 [Source:MGI Symbol;Acc:MGI:98640]	2.26995
Mrgpre	MAS-related GPR, member E [Source:MGI Symbol;Acc:MGI:2441884]	2.26876
Tbc1d4	TBC1 domain family, member 4 [Source:MGI Symbol;Acc:MGI:2429660]	2.26857
Itga2b	integrin alpha 2b [Source:MGI Symbol;Acc:MGI:96601]	2.26621
Lingo1	leucine rich repeat and Ig domain containing 1 [Source:MGI Symbol;Acc:MGI:1915522]	2.26511
Gprasp2	G protein-coupled receptor associated sorting protein 2 [Source:MGI Symbol;Acc:MGI:2442071]	2.26449
Ypel2	yippee-like 2 (Drosophila) [Source:MGI Symbol;Acc:MGI:1925114]	2.26397
Zbtb42	zinc finger and BTB domain containing 42 [Source:MGI Symbol;Acc:MGI:3644133]	2.26231
Dao	D-amino acid oxidase [Source:MGI Symbol;Acc:MGI:94859]	2.26204
Ap1s2	adaptor-related protein complex 1, sigma 2 subunit [Source:MGI Symbol;Acc:MGI:1889383]	2.26191
Ttll1	tubulin tyrosine ligase-like 1 [Source:MGI Symbol;Acc:MGI:2443047]	2.2596
Tmem140	transmembrane protein 140 [Source:MGI Symbol;Acc:MGI:1915737]	2.25757
Foxa2	forkhead box A2 [Source:MGI Symbol;Acc:MGI:1347476]	2.25616
Gm10480	predicted gene 10480 [Source:MGI Symbol;Acc:MGI:3642435]	2.25458
AC105358.1	No description	2.25332
Ppm1k	protein phosphatase 1K (PP2C domain containing) [Source:MGI Symbol;Acc:MGI:2442111]	2.25225
Mbd4	methyl-CpG binding domain protein 4 [Source:MGI Symbol;Acc:MGI:1333850]	2.25115
0910001L09Rik	RIKEN cDNA 0910001L09 gene [Source:MGI Symbol;Acc:MGI:1913346]	2.2509
Cmas	cytidine monophospho-N-acetylneuraminic acid synthetase [Source:MGI Symbol;Acc:MGI:1337124]	2.25084
Zbtb7b	zinc finger and BTB domain containing 7B [Source:MGI Symbol;Acc:MGI:102755]	2.24945
Fstl1	follistatin-like 1 [Source:MGI Symbol;Acc:MGI:102793]	2.24827
Slc29a3	solute carrier family 29 (nucleoside transporters), member 3 [Source:MGI Symbol;Acc:MGI:1918529]	2.2436
Pkp3	plakophilin 3 [Source:MGI Symbol;Acc:MGI:1891830]	2.24015
Crip1	cysteine-rich protein 1 (intestinal) [Source:MGI Symbol;Acc:MGI:88501]	2.23971
Cdon	cell adhesion molecule-related/down-regulated by oncogenes [Source:MGI Symbol;Acc:MGI:1926387]	2.23831
Plekha3	pleckstrin homology domain-containing, family A (phosphoinositide binding specific) member 3 [Source:MGI Symbol;Acc:MGI:1932515]	2.23797
Pik3ap1	phosphoinositide-3-kinase adaptor protein 1 [Source:MGI Symbol;Acc:MGI:1933177]	2.23741
Ociad2	OCIA domain containing 2 [Source:MGI Symbol;Acc:MGI:1916377]	2.23611
Stmn1	stathmin 1 [Source:MGI Symbol;Acc:MGI:96739]	2.23386
Ube2t	ubiquitin-conjugating enzyme E2T (putative) [Source:MGI Symbol;Acc:MGI:1914446]	2.23357
Jhdm1d	RIKEN cDNA 4930599N23 gene [Source:MGI Symbol;Acc:MGI:1922629]	2.23168
Gcnt4	glucosaminyl (N-acetyl) transferase 4, core 2 (beta-1,6-N-acetylglucosaminyltransferase) [Source:MGI Symbol;Acc:MGI:2684919]	2.2303
Snx7	sorting nexin 7 [Source:MGI Symbol;Acc:MGI:1923811]	2.23021
St3gal5	ST3 beta-galactoside alpha-2,3-sialyltransferase 5 [Source:MGI Symbol;Acc:MGI:1339963]	2.22939
Tnfsf9	predicted gene 11110 [Source:MGI Symbol;Acc:MGI:3779362]	2.22899
Atoh8	atonal homolog 8 (Drosophila) [Source:MGI Symbol;Acc:MGI:1918343]	2.22745
Tmem108	predicted gene 16252 [Source:MGI Symbol;Acc:MGI:3826521]	2.22719
Pttg1	pituitary tumor-transforming gene 1 [Source:MGI Symbol;Acc:MGI:1353578]	2.22563
1200007C13Rik	RIKEN cDNA 1200007C13 gene [Source:MGI Symbol;Acc:MGI:1921369]	2.22552
Nqo1	NAD(P)H dehydrogenase, quinone 1 [Source:MGI Symbol;Acc:MGI:103187]	2.22481
Fam83d	family with sequence similarity 83, member D [Source:MGI Symbol;Acc:MGI:1919128]	2.22461
Pdxp	SH3-domain binding protein 1 [Source:MGI Symbol;Acc:MGI:104603]	2.22454
Snx22	peptidylprolyl isomerase B [Source:MGI Symbol;Acc:MGI:97750]	2.22326
L1cam	L1 cell adhesion molecule [Source:MGI Symbol;Acc:MGI:96721]	2.21864
Smo	smoothened homolog (Drosophila) [Source:MGI Symbol;Acc:MGI:108075]	2.21813
Srp14	signal recognition particle 14 [Source:MGI Symbol;Acc:MGI:107169]	2.21548
B3gnt5	UDP-GlcNAc:betaGal beta-1,3-N-acetylglucosaminyltransferase 5 [Source:MGI Symbol;Acc:MGI:2137302]	2.2151
Frk	fyn-related kinase [Source:MGI Symbol;Acc:MGI:103265]	2.21399
Wdr81	WD repeat domain 81 [Source:MGI Symbol;Acc:MGI:2681828]	2.21166
Comp	cartilage oligomeric matrix protein [Source:MGI Symbol;Acc:MGI:88469]	2.2116
Adck3	CDC42 binding protein kinase alpha [Source:MGI Symbol;Acc:MGI:2441841]	2.21143
Sdc3	syndecan 3 [Source:MGI Symbol;Acc:MGI:1349163]	2.20999
Myom3	myomesin family, member 3 [Source:MGI Symbol;Acc:MGI:2685280]	2.20896
Adcy1	adenylate cyclase 1 [Source:MGI Symbol;Acc:MGI:99677]	2.20459
Ypel1	yippee-like 1 (Drosophila) [Source:MGI Symbol;Acc:MGI:1913303]	2.20249
Adamts14	a disintegrin-like and metallopeptidase (reprolysin type) with thrombospondin type 1 motif, 14 [Source:MGI Symbol;Acc:MGI:2179942]	2.19959
Tlr3	toll-like receptor 3 [Source:MGI Symbol;Acc:MGI:2156367]	2.19939
Hk2	hexokinase 2 [Source:MGI Symbol;Acc:MGI:1315197]	2.1951
Btg2	B cell translocation gene 2, anti-proliferative [Source:MGI Symbol;Acc:MGI:108384]	2.19466
AC133939.1	Tubulin beta-5 chain [Source:UniProtKB/TrEMBL;Acc:G3UZR1]	2.19417
Doxl2	diamine oxidase-like protein 2 [Source:MGI Symbol;Acc:MGI:3618290]	2.19103
Gm22	predicted gene 20388 [Source:MGI Symbol;Acc:MGI:5141853]	2.19037
Cyp46a1	cytochrome P450, family 46, subfamily a, polypeptide 1 [Source:MGI Symbol;Acc:MGI:1341877]	2.19036
Lman1l	lectin, mannose-binding 1 like [Source:MGI Symbol;Acc:MGI:2667537]	2.18916
Stra13	stimulated by retinoic acid 13 [Source:MGI Symbol;Acc:MGI:894324]	2.18898
Dnajc12	DnaJ (Hsp40) homolog, subfamily C, member 12 [Source:MGI Symbol;Acc:MGI:1353428]	2.1878
Abhd8	abhydrolase domain containing 8 [Source:MGI Symbol;Acc:MGI:1918946]	2.18661
Raver2	ribonucleoprotein, PTB-binding 2 [Source:MGI Symbol;Acc:MGI:2443623]	2.18619
Tspan5	tetraspanin 5 [Source:MGI Symbol;Acc:MGI:1928096]	2.18613
Cntn2	contactin 2 [Source:MGI Symbol;Acc:MGI:104518]	2.18497
Abca1	ATP-binding cassette, sub-family A (ABC1), member 1 [Source:MGI Symbol;Acc:MGI:99607]	2.18435
Pdia4	protein disulfide isomerase associated 4 [Source:MGI Symbol;Acc:MGI:104864]	2.18339
Gm12758	predicted gene 12758 [Source:MGI Symbol;Acc:MGI:3702543]	2.18292
Tex19.1	testis expressed gene 19.1 [Source:MGI Symbol;Acc:MGI:1920929]	2.17849
Atp2c2	ATPase, Ca++ transporting, type 2C, member 2 [Source:MGI Symbol;Acc:MGI:1916297]	2.17804
Atp6v0a4	ATPase, H+ transporting, lysosomal V0 subunit A4 [Source:MGI Symbol;Acc:MGI:2153480]	2.17776
Lrig1	solute carrier family 25 (mitochondrial carrier, phosphate carrier), member 26 [Source:MGI Symbol;Acc:MGI:1914832]	2.17464
Cryl1	crystallin, lambda 1 [Source:MGI Symbol;Acc:MGI:1915881]	2.17026
4632428N05Rik	cadherin 23 (otocadherin) [Source:MGI Symbol;Acc:MGI:1890219]	2.17015
Ankrd52	ankyrin repeat domain 52 [Source:MGI Symbol;Acc:MGI:2444029]	2.16947
Gtse1	G two S phase expressed protein 1 [Source:MGI Symbol;Acc:MGI:1352755]	2.16678
Mxra8	predicted gene 10562 [Source:MGI Symbol;Acc:MGI:3704241]	2.16462
Cdca3	cell division cycle associated 3 [Source:MGI Symbol;Acc:MGI:1315198]	2.16411
Alcam	activated leukocyte cell adhesion molecule [Source:MGI Symbol;Acc:MGI:1313266]	2.16364
Tmprss4	transmembrane protease, serine 4 [Source:MGI Symbol;Acc:MGI:2384877]	2.16296
Aurkb	aurora kinase B [Source:MGI Symbol;Acc:MGI:107168]	2.16263
Arhgef4	RIKEN cDNA C230030N03 gene [Source:MGI Symbol;Acc:MGI:3045297]	2.16241
Ppl	periplakin [Source:MGI Symbol;Acc:MGI:1194898]	2.16208
Slc43a2	solute carrier family 43, member 2 [Source:MGI Symbol;Acc:MGI:2442746]	2.16038
Mdfi	MyoD family inhibitor [Source:MGI Symbol;Acc:MGI:107687]	2.15961
Prdx1	peroxiredoxin 1 [Source:MGI Symbol;Acc:MGI:99523]	2.15671
Efhd2	EF hand domain containing 2 [Source:MGI Symbol;Acc:MGI:106504]	2.15444
2810408I11Rik	RIKEN cDNA 2810408I11 gene [Source:MGI Symbol;Acc:MGI:1917191]	2.1538
Ttc30b	tetratricopeptide repeat domain 30B [Source:MGI Symbol;Acc:MGI:1919671]	2.15362
Phka1	phosphorylase kinase alpha 1 [Source:MGI Symbol;Acc:MGI:97576]	2.15083
Naga	N-acetyl galactosaminidase, alpha [Source:MGI Symbol;Acc:MGI:1261422]	2.15027
Gchfr	GTP cyclohydrolase I feedback regulator [Source:MGI Symbol;Acc:MGI:2443977]	2.14673
Tcp11	t-complex protein 11 [Source:MGI Symbol;Acc:MGI:98544]	2.14615
Fam149a	family with sequence similarity 149, member A [Source:MGI Symbol;Acc:MGI:2387177]	2.14353
Ndufa4	NADH dehydrogenase (ubiquinone) 1 alpha subcomplex, 4 [Source:MGI Symbol;Acc:MGI:107686]	2.14325
Pqlc3	PQ loop repeat containing [Source:MGI Symbol;Acc:MGI:2444067]	2.14255
Ptgr1	prostaglandin reductase 1 [Source:MGI Symbol;Acc:MGI:1914353]	2.14238
Cd52	absent in melanoma 1-like [Source:MGI Symbol;Acc:MGI:1334463]	2.14095
Mcm4	minichromosome maintenance deficient 4 homolog (S. cerevisiae) [Source:MGI Symbol;Acc:MGI:103199]	2.14029
Rtn4rl1	reticulon 4 receptor-like 1 [Source:MGI Symbol;Acc:MGI:2661375]	2.13991
Ets1	E26 avian leukemia oncogene 1, 5' domain [Source:MGI Symbol;Acc:MGI:95455]	2.13738
Sirt7	sirtuin 7 (silent mating type information regulation 2, homolog) 7 (S. cerevisiae) [Source:MGI Symbol;Acc:MGI:2385849]	2.13681
Xylt2	xylosyltransferase II [Source:MGI Symbol;Acc:MGI:2444797]	2.13634
Chst10	carbohydrate sulfotransferase 10 [Source:MGI Symbol;Acc:MGI:2138283]	2.13527
Bin1	bridging integrator 1 [Source:MGI Symbol;Acc:MGI:108092]	2.13357
Gm11992	Sad1 and UNC84 domain containing 3 [Source:MGI Symbol;Acc:MGI:3041199]	2.13236
Iqsec1	IQ motif and Sec7 domain 1 [Source:MGI Symbol;Acc:MGI:1196356]	2.12972
Esd	esterase D/formylglutathione hydrolase [Source:MGI Symbol;Acc:MGI:95421]	2.12914
Fbln1	fibulin 1 [Source:MGI Symbol;Acc:MGI:95487]	2.12737
Rtn4r	reticulon 4 receptor [Source:MGI Symbol;Acc:MGI:2136886]	2.12685
Sox10	SRY-box containing gene 10 [Source:MGI Symbol;Acc:MGI:98358]	2.12627
AC239880.1	No description	2.12593
Ing4	inhibitor of growth family, member 4 [Source:MGI Symbol;Acc:MGI:107307]	2.12584
Copz2	coatomer protein complex, subunit zeta 2 [Source:MGI Symbol;Acc:MGI:1929008]	2.12577
Adamts10	a disintegrin-like and metallopeptidase (reprolysin type) with thrombospondin type 1 motif, 10 [Source:MGI Symbol;Acc:MGI:2449112]	2.12576
G6pdx	inhibitor of kappaB kinase gamma [Source:MGI Symbol;Acc:MGI:1338074]	2.12549
Lyrm5	LYR motif containing 5 [Source:MGI Symbol;Acc:MGI:1914886]	2.12534
Aspg	asparaginase homolog (S. cerevisiae) [Source:MGI Symbol;Acc:MGI:2144822]	2.12488
Trim21	tripartite motif-containing 21 [Source:MGI Symbol;Acc:MGI:106657]	2.12473
Snn	stannin [Source:MGI Symbol;Acc:MGI:1276549]	2.12261
BC018242	cDNA sequence BC018242 [Source:MGI Symbol;Acc:MGI:2384575]	2.12083
Cdca2	cell division cycle associated 2 [Source:MGI Symbol;Acc:MGI:1919787]	2.12048
Epb4.1l4b	erythrocyte protein band 4.1-like 4b [Source:MGI Symbol;Acc:MGI:1859149]	2.1202
Mosc2	MOCO sulphurase C-terminal domain containing 2 [Source:MGI Symbol;Acc:MGI:1914497]	2.11936
Slc41a1	solute carrier family 41, member 1 [Source:MGI Symbol;Acc:MGI:2444823]	2.11896
Sfxn5	sideroflexin 5 [Source:MGI Symbol;Acc:MGI:2137681]	2.11863
Plch2	phospholipase C, eta 2 [Source:MGI Symbol;Acc:MGI:2443078]	2.11733
Zwint	ZW10 interactor [Source:MGI Symbol;Acc:MGI:1289227]	2.11513
Reep4	receptor accessory protein 4 [Source:MGI Symbol;Acc:MGI:1919799]	2.11429
AA986860	expressed sequence AA986860 [Source:MGI Symbol;Acc:MGI:2138143]	2.11188
Dclk3	doublecortin-like kinase 3 [Source:MGI Symbol;Acc:MGI:3039580]	2.11064
Slc44a4	solute carrier family 44, member 4 [Source:MGI Symbol;Acc:MGI:1917379]	2.11023
Aplp1	amyloid beta (A4) precursor-like protein 1 [Source:MGI Symbol;Acc:MGI:88046]	2.109
Aff3	AF4/FMR2 family, member 3 [Source:MGI Symbol;Acc:MGI:106927]	2.10892
Nav1	neuron navigator 1 [Source:MGI Symbol;Acc:MGI:2183683]	2.10792
Lhx2	LIM homeobox protein 2 [Source:MGI Symbol;Acc:MGI:96785]	2.10597
Tcirg1	T cell, immune regulator 1, ATPase, H+ transporting, lysosomal V0 protein A3 [Source:MGI Symbol;Acc:MGI:1350931]	2.10263
Rltpr	RGD motif, leucine rich repeats, tropomodulin domain and proline-rich containing [Source:MGI Symbol;Acc:MGI:2685431]	2.10109
Abca4	ATP-binding cassette, sub-family A (ABC1), member 4 [Source:MGI Symbol;Acc:MGI:109424]	2.10094
Tiam2	T cell lymphoma invasion and metastasis 2 [Source:MGI Symbol;Acc:MGI:1344338]	2.10083
Nfatc1	nuclear factor of activated T cells, cytoplasmic, calcineurin dependent 1 [Source:MGI Symbol;Acc:MGI:102469]	2.10069
Arhgef5	Rho guanine nucleotide exchange factor (GEF) 5 [Source:MGI Symbol;Acc:MGI:1858952]	2.10066
Aldh4a1	No description	2.10022
Bid	BCL2-like 13 (apoptosis facilitator) [Source:MGI Symbol;Acc:MGI:2136959]	2.10005
Mapk11	mitogen-activated protein kinase 11 [Source:MGI Symbol;Acc:MGI:1338024]	2.0997
Pim2	proviral integration site 2 [Source:MGI Symbol;Acc:MGI:97587]	2.09643
Nrarp	Notch-regulated ankyrin repeat protein [Source:MGI Symbol;Acc:MGI:1914372]	2.09576
Pax6	Pax6 opposite strand transcript 1 [Source:MGI Symbol;Acc:MGI:3028033]	2.09571
Dgkh	diacylglycerol kinase, eta [Source:MGI Symbol;Acc:MGI:2444188]	2.09538
Slc50a1	solute carrier family 50 (sugar transporter), member 1 [Source:MGI Symbol;Acc:MGI:107417]	2.09301
Tmem205	transmembrane protein 205 [Source:MGI Symbol;Acc:MGI:3045495]	2.09179
Hmga2	high mobility group AT-hook 2 [Source:MGI Symbol;Acc:MGI:101761]	2.09107
Zfp385a	zinc finger protein 385A [Source:MGI Symbol;Acc:MGI:1352495]	2.08974
Grn	granulin [Source:MGI Symbol;Acc:MGI:95832]	2.08934
Eno2	enolase 2, gamma neuronal [Source:MGI Symbol;Acc:MGI:95394]	2.08874
Ppp2r2c	protein phosphatase 2 (formerly 2A), regulatory subunit B (PR 52), gamma isoform [Source:MGI Symbol;Acc:MGI:2442660]	2.08871
Plekhg6	pleckstrin homology domain containing, family G (with RhoGef domain) member 6 [Source:MGI Symbol;Acc:MGI:2682298]	2.08797
Dad1	defender against cell death 1 [Source:MGI Symbol;Acc:MGI:101912]	2.08783
Wbscr27	Williams Beuren syndrome chromosome region 27 (human) [Source:MGI Symbol;Acc:MGI:1933146]	2.0861
Sema7a	sema domain, immunoglobulin domain (Ig), and GPI membrane anchor, (semaphorin) 7A [Source:MGI Symbol;Acc:MGI:1306826]	2.08597
Rad51ap1	RAD51 associated protein 1 [Source:MGI Symbol;Acc:MGI:1098224]	2.0859
Igf2bp2	insulin-like growth factor 2 mRNA binding protein 2 [Source:MGI Symbol;Acc:MGI:1890358]	2.08557
Ctso	cathepsin O [Source:MGI Symbol;Acc:MGI:2139628]	2.08485
Tcf7l1	transcription factor 7 like 1 (T cell specific, HMG box) [Source:MGI Symbol;Acc:MGI:1202876]	2.08466
A830007P12Rik	RIKEN cDNA A830007P12 gene [Source:MGI Symbol;Acc:MGI:2442720]	2.08431
C130071C03Rik	RIKEN cDNA C130071C03 gene [Source:MGI Symbol;Acc:MGI:2443574]	2.08423
Ecm1	extracellular matrix protein 1 [Source:MGI Symbol;Acc:MGI:103060]	2.08367
2810405K02Rik	membrane metallo-endopeptidase-like 1 [Source:MGI Symbol;Acc:MGI:1351603]	2.08364
Man2b1	mannosidase 2, alpha B1 [Source:MGI Symbol;Acc:MGI:107286]	2.08353
Inpp5d	inositol polyphosphate-5-phosphatase D [Source:MGI Symbol;Acc:MGI:107357]	2.0788
Cdca5	cell division cycle associated 5 [Source:MGI Symbol;Acc:MGI:1915099]	2.07654
Mitf	microphthalmia-associated transcription factor [Source:MGI Symbol;Acc:MGI:104554]	2.07495
Cacna2d2	calcium channel, voltage-dependent, alpha 2/delta subunit 2 [Source:MGI Symbol;Acc:MGI:1929813]	2.07388
Uroc1	urocanase domain containing 1 [Source:MGI Symbol;Acc:MGI:2385332]	2.0733
Mmp14	matrix metallopeptidase 14 (membrane-inserted) [Source:MGI Symbol;Acc:MGI:101900]	2.07151
Kank3	KN motif and ankyrin repeat domains 3 [Source:MGI Symbol;Acc:MGI:1098615]	2.07067
Mrps25	nuclear receptor subfamily 2, group C, member 2 [Source:MGI Symbol;Acc:MGI:1352466]	2.07051
9130204K15Rik	RIKEN cDNA 9130204K15 gene [Source:MGI Symbol;Acc:MGI:2441733]	2.0702
Slc16a3	solute carrier family 16 (monocarboxylic acid transporters), member 3 [Source:MGI Symbol;Acc:MGI:1933438]	2.07012
B230307C23Rik	RIKEN cDNA B230307C23 gene [Source:MGI Symbol;Acc:MGI:3643396]	2.06943
Trim62	tripartite motif-containing 62 [Source:MGI Symbol;Acc:MGI:1914775]	2.06858
5430416O09Rik	RIKEN cDNA 5430416O09 gene [Source:MGI Symbol;Acc:MGI:1918656]	2.06725
Gstk1	glutathione S-transferase kappa 1 [Source:MGI Symbol;Acc:MGI:1923513]	2.06705
Gt(ROSA)26Sor	THUMP domain containing 3 [Source:MGI Symbol;Acc:MGI:1277973]	2.06583
Laptm5	lysosomal-associated protein transmembrane 5 [Source:MGI Symbol;Acc:MGI:108046]	2.06501
Gltpd1	glycolipid transfer protein domain containing 1 [Source:MGI Symbol;Acc:MGI:1933107]	2.06422
Lad1	ladinin [Source:MGI Symbol;Acc:MGI:109343]	2.06334
Zcchc24	zinc finger, CCHC domain containing 24 [Source:MGI Symbol;Acc:MGI:1919168]	2.06013
Tmem25	transmembrane protein 25 [Source:MGI Symbol;Acc:MGI:1918937]	2.06002
Tmem43	transmembrane protein 43 [Source:MGI Symbol;Acc:MGI:1921372]	2.05933
Gjc1	gap junction protein, gamma 1 [Source:MGI Symbol;Acc:MGI:95718]	2.05882
Stap2	signal transducing adaptor family member 2 [Source:MGI Symbol;Acc:MGI:2147039]	2.05837
Il3ra	interleukin 3 receptor, alpha chain [Source:MGI Symbol;Acc:MGI:96553]	2.05751
Krt7	keratin 7 [Source:MGI Symbol;Acc:MGI:96704]	2.05705
Cgn	cingulin [Source:MGI Symbol;Acc:MGI:1927237]	2.05688
Slc5a5	solute carrier family 5 (sodium iodide symporter), member 5 [Source:MGI Symbol;Acc:MGI:2149330]	2.05637
Fam69b	predicted gene 20532 [Source:MGI Symbol;Acc:MGI:5141997]	2.05311
Stk10	serine/threonine kinase 10 [Source:MGI Symbol;Acc:MGI:1099439]	2.05277
Pmm1	phosphomannomutase 1 [Source:MGI Symbol;Acc:MGI:1353418]	2.05146
Ttc21b	tetratricopeptide repeat domain 21B [Source:MGI Symbol;Acc:MGI:1920918]	2.05144
Nlrx1	NLR family member X1 [Source:MGI Symbol;Acc:MGI:2429611]	2.04991
Stmn3	stathmin-like 3 [Source:MGI Symbol;Acc:MGI:1277137]	2.04891
Cnp	2',3'-cyclic nucleotide 3' phosphodiesterase [Source:MGI Symbol;Acc:MGI:88437]	2.04791
Gpc4	glypican 4 [Source:MGI Symbol;Acc:MGI:104902]	2.0475
Ccnb1ip1	cyclin B1 interacting protein 1 [Source:MGI Symbol;Acc:MGI:2685134]	2.04591
St6galnac6	ST6 euraminyl-2,3-beta-galactosyl-1,3)-N-acetylgalactosaminide alpha-2,6-sialyltransferase 6 [Source:MGI Symbol;Acc:MGI:1355316]	2.04464
Atp6v1f	ATPase, H+ transporting, lysosomal V1 subunit F [Source:MGI Symbol;Acc:MGI:1913394]	2.0408
Serinc2	serine incorporator 2 [Source:MGI Symbol;Acc:MGI:1919132]	2.04057
Nudt16l1	nudix (nucleoside diphosphate linked moiety X)-type motif 16-like 1 [Source:MGI Symbol;Acc:MGI:1914161]	2.03954
Pir	pirin [Source:MGI Symbol;Acc:MGI:1916906]	2.03903
Zdhhc12	protein kinase N3 [Source:MGI Symbol;Acc:MGI:2388285]	2.03758
Tubg1	tubulin, gamma 1 [Source:MGI Symbol;Acc:MGI:101834]	2.03664
Vrk2	Fanconi anemia, complementation group L [Source:MGI Symbol;Acc:MGI:1914280]	2.03365
Pdp2	pyruvate dehyrogenase phosphatase catalytic subunit 2 [Source:MGI Symbol;Acc:MGI:1918878]	2.03127
Wdr8	WD repeat domain 8 [Source:MGI Symbol;Acc:MGI:1891749]	2.03067
Rbm38	RNA binding motif protein 38 [Source:MGI Symbol;Acc:MGI:1889294]	2.03045
Dlk1	delta-like 1 homolog (Drosophila) [Source:MGI Symbol;Acc:MGI:94900]	2.02981
Arhgef26	Rho guanine nucleotide exchange factor (GEF) 26 [Source:MGI Symbol;Acc:MGI:1918053]	2.02848
Chordc1	cysteine and histidine-rich domain (CHORD)-containing, zinc-binding protein 1 [Source:MGI Symbol;Acc:MGI:1914167]	2.02827
Tbc1d10a	TBC1 domain family, member 10a [Source:MGI Symbol;Acc:MGI:2144164]	2.02681
Col7a1	collagen, type VII, alpha 1 [Source:MGI Symbol;Acc:MGI:88462]	2.02655
C2cd4c	C2 calcium-dependent domain containing 4C [Source:MGI Symbol;Acc:MGI:2685084]	2.02626
Bst2	bone marrow stromal cell antigen 2 [Source:MGI Symbol;Acc:MGI:1916800]	2.02443
Abcb9	ATP-binding cassette, sub-family B (MDR/TAP), member 9 [Source:MGI Symbol;Acc:MGI:1861729]	2.02337
Mad2l1	MAD2 mitotic arrest deficient-like 1 (yeast) [Source:MGI Symbol;Acc:MGI:1860374]	2.0233
Slco3a1	solute carrier organic anion transporter family, member 3a1 [Source:MGI Symbol;Acc:MGI:1351867]	2.02247
Ppif	peptidylprolyl isomerase F (cyclophilin F) [Source:MGI Symbol;Acc:MGI:2145814]	2.02227
Fig4	FIG4 homolog (S. cerevisiae) [Source:MGI Symbol;Acc:MGI:2143585]	2.0211
Epha1	zyxin [Source:MGI Symbol;Acc:MGI:103072]	2.02105
Accs	1-aminocyclopropane-1-carboxylate synthase homolog (Arabidopsis)(non-functional) [Source:MGI Symbol;Acc:MGI:1919717]	2.02057
Commd3	COMM domain containing 3 [Source:MGI Symbol;Acc:MGI:88218]	2.02008
4930427A07Rik	RIKEN cDNA 4930427A07 gene [Source:MGI Symbol;Acc:MGI:2144738]	2.01966
Asap3	ArfGAP with SH3 domain, ankyrin repeat and PH domain 3 [Source:MGI Symbol;Acc:MGI:2684986]	2.01944
Unc119	unc-119 homolog (C. elegans) [Source:MGI Symbol;Acc:MGI:1328357]	2.0185
Synpo	synaptopodin [Source:MGI Symbol;Acc:MGI:1099446]	2.01801
Met	met proto-oncogene [Source:MGI Symbol;Acc:MGI:96969]	2.01775
Tns4	tensin 4 [Source:MGI Symbol;Acc:MGI:2144377]	2.01649
2410015M20Rik	RIKEN cDNA 2410015M20 gene [Source:MGI Symbol;Acc:MGI:2442174]	2.01567
Wasf1	WAS protein family, member 1 [Source:MGI Symbol;Acc:MGI:1890563]	2.01552
Cpt1c	carnitine palmitoyltransferase 1c [Source:MGI Symbol;Acc:MGI:2446526]	2.01213
Abtb2	ankyrin repeat and BTB (POZ) domain containing 2 [Source:MGI Symbol;Acc:MGI:2139365]	2.01161
Stom	stomatin [Source:MGI Symbol;Acc:MGI:95403]	2.01002
Klhdc8b	kelch domain containing 8B [Source:MGI Symbol;Acc:MGI:1925517]	2.00877
Atp1a2	immunoglobulin superfamily, member 8 [Source:MGI Symbol;Acc:MGI:2154090]	2.00728
Azi1	5-azacytidine induced gene 1 [Source:MGI Symbol;Acc:MGI:107440]	2.00727
9030418K01Rik	RIKEN cDNA 9030418K01 gene [Source:MGI Symbol;Acc:MGI:1918782]	2.00725
Foxj2	forkhead box J2 [Source:MGI Symbol;Acc:MGI:1926805]	2.00597
Plxnd1	plexin D1 [Source:MGI Symbol;Acc:MGI:2154244]	2.00584
Rrad	Ras-related associated with diabetes [Source:MGI Symbol;Acc:MGI:1930943]	2.00551
Fam54a	family with sequence similarity 54, member A [Source:MGI Symbol;Acc:MGI:1919054]	2.00542
AA467197	expressed sequence AA467197 [Source:MGI Symbol;Acc:MGI:3034182]	2.00522
Ptprm	protein tyrosine phosphatase, receptor type, M [Source:MGI Symbol;Acc:MGI:102694]	2.00519
Lpin3	predicted gene, 16751 [Source:MGI Symbol;Acc:MGI:4439675]	2.00367
Eme2	splA/ryanodine receptor domain and SOCS box containing 3 [Source:MGI Symbol;Acc:MGI:1891471]	2.00308
Nr6a1	nuclear receptor subfamily 6, group A, member 1 [Source:MGI Symbol;Acc:MGI:1352459]	2.00239
Gm10094	predicted gene 10094 [Source:MGI Symbol;Acc:MGI:3704317]	2.00091
Prkrir	protein-kinase, interferon-inducible double stranded RNA dependent inhibitor, repressor of (P58 repressor) [Source:MGI Symbol;Acc:MGI:1920231]	0.509999
AC151712.4	erythroid differentiation regulator 1 [Source:RefSeq peptide;Acc:NP_579940]	0.509867
Plekha1	fibroblast growth factor receptor 2 [Source:MGI Symbol;Acc:MGI:95523]	0.509816
Slc7a5	predicted gene 20388 [Source:MGI Symbol;Acc:MGI:5141853]	0.509689
Tgfbi	transforming growth factor, beta induced [Source:MGI Symbol;Acc:MGI:99959]	0.509572
Yars	tyrosyl-tRNA synthetase [Source:MGI Symbol;Acc:MGI:2147627]	0.509469
Zfp93	zinc finger protein 93 [Source:MGI Symbol;Acc:MGI:107611]	0.50944
Ahrr	aryl-hydrocarbon receptor repressor [Source:MGI Symbol;Acc:MGI:1333776]	0.508
Bcl7b	B cell CLL/lymphoma 7B [Source:MGI Symbol;Acc:MGI:1332238]	0.507373
Chd7	chromodomain helicase DNA binding protein 7 [Source:MGI Symbol;Acc:MGI:2444748]	0.507181
Igf2as	insulin-like growth factor 2 [Source:MGI Symbol;Acc:MGI:96434]	0.507083
Ears2	glutamyl-tRNA synthetase 2 (mitochondrial)(putative) [Source:MGI Symbol;Acc:MGI:1914667]	0.506945
E2f8	E2F transcription factor 8 [Source:MGI Symbol;Acc:MGI:1922038]	0.506855
2310033E01Rik	RIKEN cDNA 2310033E01 gene [Source:MGI Symbol;Acc:MGI:3615324]	0.506624
Tchp	trichoplein, keratin filament binding [Source:MGI Symbol;Acc:MGI:1925082]	0.506274
2700062C07Rik	RIKEN cDNA 2700062C07 gene [Source:MGI Symbol;Acc:MGI:1915296]	0.505889
Fgfrl1	fibroblast growth factor receptor-like 1 [Source:MGI Symbol;Acc:MGI:2150920]	0.505756
Sars	seryl-aminoacyl-tRNA synthetase [Source:MGI Symbol;Acc:MGI:102809]	0.505455
Tbc1d12	TBC1D12: TBC1 domain family, member 12 [Source:MGI Symbol;Acc:MGI:2384803]	0.504956
D230002A01Rik	Iroquois related homeobox 3 (Drosophila) [Source:MGI Symbol;Acc:MGI:1197522]	0.504938
Kcnj11	potassium inwardly rectifying channel, subfamily J, member 11 [Source:MGI Symbol;Acc:MGI:107501]	0.504891
Rbpms	RNA binding protein gene with multiple splicing [Source:MGI Symbol;Acc:MGI:1334446]	0.504669
Cds1	CDP-diacylglycerol synthase 1 [Source:MGI Symbol;Acc:MGI:1921846]	0.504654
Bbs1	Bardet-Biedl syndrome 1 (human) [Source:MGI Symbol;Acc:MGI:1277215]	0.504565
Onecut1	predicted gene 20649 [Source:MGI Symbol;Acc:MGI:5313096]	0.504259
Arhgap42	Rho GTPase activating protein 42 [Source:MGI Symbol;Acc:MGI:1918794]	0.503554
Crtc3	CREB regulated transcription coactivator 3 [Source:MGI Symbol;Acc:MGI:1917711]	0.503509
Zic1	zinc finger protein of the cerebellum 1 [Source:MGI Symbol;Acc:MGI:106683]	0.503465
Heyl	hairy/enhancer-of-split related with YRPW motif-like [Source:MGI Symbol;Acc:MGI:1860511]	0.502736
Tdrd5	tudor domain containing 5 [Source:MGI Symbol;Acc:MGI:2684949]	0.502422
Bcap29	B cell receptor associated protein 29 [Source:MGI Symbol;Acc:MGI:101917]	0.502258
Nrcam	neuron-glia-CAM-related cell adhesion molecule [Source:MGI Symbol;Acc:MGI:104750]	0.50195
4921507P07Rik	RIKEN cDNA 5430402O13 gene [Source:MGI Symbol;Acc:MGI:1918631]	0.501801
Dnahc10	dynein, axonemal, heavy chain 10 [Source:MGI Symbol;Acc:MGI:1860299]	0.501393
Pbld2	phenazine biosynthesis-like protein domain containing 2 [Source:MGI Symbol;Acc:MGI:1914557]	0.500933
Lars	leucyl-tRNA synthetase [Source:MGI Symbol;Acc:MGI:1913808]	0.500866
Nppc	natriuretic peptide type C [Source:MGI Symbol;Acc:MGI:97369]	0.50063
Cdc16	CDC16 cell division cycle 16 homolog (S. cerevisiae) [Source:MGI Symbol;Acc:MGI:1917207]	0.50041
Spire1	spire homolog 1 (Drosophila) [Source:MGI Symbol;Acc:MGI:1915416]	0.499985
Chchd8	coiled-coil-helix-coiled-coil-helix domain containing 8 [Source:MGI Symbol;Acc:MGI:1915435]	0.499807
Pdlim4	PDZ and LIM domain 4 [Source:MGI Symbol;Acc:MGI:1353470]	0.49965
Adamts15	a disintegrin-like and metallopeptidase (reprolysin type) with thrombospondin type 1 motif, 15 [Source:MGI Symbol;Acc:MGI:2449569]	0.499435
Enox2	ecto-NOX disulfide-thiol exchanger 2 [Source:MGI Symbol;Acc:MGI:2384799]	0.499053
Tgfb1i1	transforming growth factor beta 1 induced transcript 1 [Source:MGI Symbol;Acc:MGI:102784]	0.499028
Nup43	protein-L-isoaspartate (D-aspartate) O-methyltransferase 1 [Source:MGI Symbol;Acc:MGI:97502]	0.498894
Cdc23	kinesin family member 20A [Source:MGI Symbol;Acc:MGI:1201682]	0.497766
Crcp	calcitonin gene-related peptide-receptor component protein [Source:MGI Symbol;Acc:MGI:1100818]	0.497648
Pak6	p21 protein (Cdc42/Rac)-activated kinase 6 [Source:MGI Symbol;Acc:MGI:2679420]	0.497032
Irf6	interferon regulatory factor 6 [Source:MGI Symbol;Acc:MGI:1859211]	0.496872
Avpi1	arginine vasopressin-induced 1 [Source:MGI Symbol;Acc:MGI:1916784]	0.495716
Lmo4	LIM domain only 4 [Source:MGI Symbol;Acc:MGI:109360]	0.495297
Mt1	metallothionein 1 [Source:MGI Symbol;Acc:MGI:97171]	0.494039
Zfp772	zinc finger protein 772 [Source:MGI Symbol;Acc:MGI:2385265]	0.493534
Fosl2	fos-like antigen 2 [Source:MGI Symbol;Acc:MGI:102858]	0.492476
A630052C17Rik	RIKEN cDNA A630052C17 gene [Source:MGI Symbol;Acc:MGI:2444673]	0.492348
Arhgef2	rho/rac guanine nucleotide exchange factor (GEF) 2 [Source:MGI Symbol;Acc:MGI:103264]	0.491978
Klf5	Kruppel-like factor 5 [Source:MGI Symbol;Acc:MGI:1338056]	0.490903
Creb3l1	cAMP responsive element binding protein 3-like 1 [Source:MGI Symbol;Acc:MGI:1347062]	0.490404
Pnma1	dynein, axonemal, light chain 1 [Source:MGI Symbol;Acc:MGI:1921462]	0.490086
Nptx1	neuronal pentraxin 1 [Source:MGI Symbol;Acc:MGI:107811]	0.489487
Wdsub1	WD repeat, SAM and U-box domain containing 1 [Source:MGI Symbol;Acc:MGI:1919387]	0.489339
Efnb2	ephrin B2 [Source:MGI Symbol;Acc:MGI:105097]	0.489191
Itpripl2	inositol 1,4,5-triphosphate receptor interacting protein-like 2 [Source:MGI Symbol;Acc:MGI:2442416]	0.488684
Rnf125	ring finger protein 125 [Source:MGI Symbol;Acc:MGI:1914914]	0.488179
Cars	cysteinyl-tRNA synthetase [Source:MGI Symbol;Acc:MGI:1351477]	0.48817
Acsf3	predicted gene 20388 [Source:MGI Symbol;Acc:MGI:5141853]	0.487773
Col16a1	collagen, type XVI, alpha 1 [Source:MGI Symbol;Acc:MGI:1095396]	0.487437
Des	desmin [Source:MGI Symbol;Acc:MGI:94885]	0.486914
Foxa3	forkhead box A3 [Source:MGI Symbol;Acc:MGI:1347477]	0.486503
Fam111a	family with sequence similarity 111, member A [Source:MGI Symbol;Acc:MGI:1915508]	0.486125
Rufy3	RUN and FYVE domain containing 3 [Source:MGI Symbol;Acc:MGI:106484]	0.48546
Fam185a	family with sequence similarity 185, member A [Source:MGI Symbol;Acc:MGI:2140983]	0.484846
Zkscan3	zinc finger with KRAB and SCAN domains 3 [Source:MGI Symbol;Acc:MGI:1919989]	0.484455
Maml1	mastermind like 1 (Drosophila) [Source:MGI Symbol;Acc:MGI:1890504]	0.484421
2005-03-01	cytoplasmic polyadenylation element binding protein 3 [Source:MGI Symbol;Acc:MGI:2443075]	0.4844
Trip6	thyroid hormone receptor interactor 6 [Source:MGI Symbol;Acc:MGI:1343458]	0.48434
Gtf2ird2	GTF2I repeat domain containing 2 [Source:MGI Symbol;Acc:MGI:2149780]	0.484086
Serpinh1	serine (or cysteine) peptidase inhibitor, clade H, member 1 [Source:MGI Symbol;Acc:MGI:88283]	0.483982
Zfp90	zinc finger protein 90 [Source:MGI Symbol;Acc:MGI:104786]	0.483911
Cdk20	cyclin-dependent kinase 20 [Source:MGI Symbol;Acc:MGI:2145349]	0.483835
Aard	alanine and arginine rich domain containing protein [Source:MGI Symbol;Acc:MGI:2181621]	0.48371
Gpt2	glutamic pyruvate transaminase (alanine aminotransferase) 2 [Source:MGI Symbol;Acc:MGI:1915391]	0.48328
Sh3bp2	SH3-domain binding protein 2 [Source:MGI Symbol;Acc:MGI:1346349]	0.483268
Ddit4	DNA-damage-inducible transcript 4 [Source:MGI Symbol;Acc:MGI:1921997]	0.483177
Zbtb8a	zinc finger and BTB domain containing 8 opposite strand [Source:MGI Symbol;Acc:MGI:1914356]	0.483076
Ccdc137	coiled-coil domain containing 137 [Source:MGI Symbol;Acc:MGI:1914541]	0.483074
Emp3	epithelial membrane protein 3 [Source:MGI Symbol;Acc:MGI:1098729]	0.483072
Kirrel	kin of IRRE like (Drosophila) [Source:MGI Symbol;Acc:MGI:1891396]	0.482987
4930503L19Rik	RIKEN cDNA 4930503L19 gene [Source:MGI Symbol;Acc:MGI:1922045]	0.482949
Patl2	protein associated with topoisomerase II homolog 2 (yeast) [Source:MGI Symbol;Acc:MGI:1914828]	0.48277
Amd-ps3	S-adenosylmethionine decarboxylase, pseudogene 3 [Source:MGI Symbol;Acc:MGI:3704487]	0.482534
Cxcr6	FYVE and coiled-coil domain containing 1 [Source:MGI Symbol;Acc:MGI:107277]	0.481364
Scpep1	RIKEN cDNA 4930405P13 gene [Source:MGI Symbol;Acc:MGI:1921171]	0.481358
Cdc14b	CDC14 cell division cycle 14 homolog B (S. cerevisiae) [Source:MGI Symbol;Acc:MGI:2441808]	0.481174
D730003I15Rik	RIKEN cDNA D730003I15 gene [Source:MGI Symbol;Acc:MGI:1925971]	0.48085
Zfp872	zinc finger protein 872 [Source:MGI Symbol;Acc:MGI:3588272]	0.480735
Eid2b	EP300 interacting inhibitor of differentiation 2B [Source:MGI Symbol;Acc:MGI:1924095]	0.48068
Bcl3	B cell leukemia/lymphoma 3 [Source:MGI Symbol;Acc:MGI:88140]	0.480077
Cln8	ceroid-lipofuscinosis, neuronal 8 [Source:MGI Symbol;Acc:MGI:1349447]	0.479866
Ift172	intraflagellar transport 172 homolog (Chlamydomonas) [Source:MGI Symbol;Acc:MGI:2682064]	0.479686
Cdx2	caudal type homeobox 2 [Source:MGI Symbol;Acc:MGI:88361]	0.479403
Msra	methionine sulfoxide reductase A [Source:MGI Symbol;Acc:MGI:106916]	0.479144
Eif3c	eukaryotic translation initiation factor 3, subunit C [Source:MGI Symbol;Acc:MGI:1926966]	0.478682
Morn4	MORN repeat containing 4 [Source:MGI Symbol;Acc:MGI:2449568]	0.478289
Ppp1r15a	tubby-like protein 2 [Source:MGI Symbol;Acc:MGI:1861600]	0.478192
Spry1	sprouty homolog 1 (Drosophila) [Source:MGI Symbol;Acc:MGI:1345139]	0.478186
Slc7a7	oxidase assembly 1-like [Source:MGI Symbol;Acc:MGI:1916339]	0.47808
Zfp760	zinc finger protein 760 [Source:MGI Symbol;Acc:MGI:2679257]	0.477984
Slc22a5	solute carrier family 22 (organic cation transporter), member 5 [Source:MGI Symbol;Acc:MGI:1329012]	0.477894
Atg4c	autophagy-related 4C (yeast) [Source:MGI Symbol;Acc:MGI:2651854]	0.47769
Pard6a	par-6 (partitioning defective 6,) homolog alpha (C. elegans) [Source:MGI Symbol;Acc:MGI:1927223]	0.477083
Zfp583	zinc finger protein 583 [Source:MGI Symbol;Acc:MGI:2682297]	0.477015
C330021F23Rik	RIKEN cDNA C330021F23 gene [Source:MGI Symbol;Acc:MGI:3612471]	0.47688
Thap2	THAP domain containing, apoptosis associated protein 2 [Source:MGI Symbol;Acc:MGI:1914066]	0.476209
Prdm1	PR domain containing 1, with ZNF domain [Source:MGI Symbol;Acc:MGI:99655]	0.475852
Usp51	ubiquitin specific protease 51 [Source:MGI Symbol;Acc:MGI:3588217]	0.475702
Ppp1r3g	protein phosphatase 1, regulatory (inhibitor) subunit 3G [Source:MGI Symbol;Acc:MGI:1923737]	0.47462
Fam105a	family with sequence similarity 105, member A [Source:MGI Symbol;Acc:MGI:2687281]	0.474331
Susd1	sushi domain containing 1 [Source:MGI Symbol;Acc:MGI:3651543]	0.473886
Sec1	secretory blood group 1 [Source:MGI Symbol;Acc:MGI:1928893]	0.473582
Blnk	B cell linker [Source:MGI Symbol;Acc:MGI:96878]	0.472436
Cyp2u1	cytochrome P450, family 2, subfamily u, polypeptide 1 [Source:MGI Symbol;Acc:MGI:1918769]	0.472246
AC241593.1	predicted gene 7120 [Source:MGI Symbol;Acc:MGI:3648543]	0.471921
Gm7120	RIKEN cDNA 3110070M22 gene [Source:MGI Symbol;Acc:MGI:1914554]	0.471759
Dync2h1	dynein cytoplasmic 2 heavy chain 1 [Source:MGI Symbol;Acc:MGI:107736]	0.471129
Hax1	HCLS1 associated X-1 [Source:MGI Symbol;Acc:MGI:1346319]	0.471127
Tbc1d19	TBC1 domain family, member 19 [Source:MGI Symbol;Acc:MGI:1914499]	0.470296
1110038B12Rik	RIKEN cDNA 1110038B12 gene [Source:MGI Symbol;Acc:MGI:1916013]	0.469435
D930048N14Rik	RIKEN cDNA D930048N14 gene [Source:MGI Symbol;Acc:MGI:2144709]	0.469127
Bex4	brain expressed gene 4 [Source:MGI Symbol;Acc:MGI:3606746]	0.469037
Rnf180	ring finger protein 180 [Source:MGI Symbol;Acc:MGI:1919066]	0.468993
Kdm6b	KDM1 lysine (K)-specific demethylase 6B [Source:MGI Symbol;Acc:MGI:2448492]	0.468478
BC034090	cDNA sequence BC034090 [Source:MGI Symbol;Acc:MGI:2672904]	0.468456
Rasal2	RAS protein activator like 2 [Source:MGI Symbol;Acc:MGI:2443881]	0.467578
Zfp553	zinc finger protein 553 [Source:MGI Symbol;Acc:MGI:2384725]	0.467356
Pion	pigeon homolog (Drosophila) [Source:MGI Symbol;Acc:MGI:2442259]	0.467329
Camkk2	calcium/calmodulin-dependent protein kinase kinase 2, beta [Source:MGI Symbol;Acc:MGI:2444812]	0.466315
Mars	DNA-damage inducible transcript 3 [Source:MGI Symbol;Acc:MGI:109247]	0.465006
Kif5a	kinesin family member 5A [Source:MGI Symbol;Acc:MGI:109564]	0.464818
Zfp358	zinc finger protein 358 [Source:MGI Symbol;Acc:MGI:2153740]	0.464669
0610007P08Rik	RIKEN cDNA 0610007P08 gene [Source:MGI Symbol;Acc:MGI:1923501]	0.464248
C3	complement component 3 [Source:MGI Symbol;Acc:MGI:88227]	0.464079
Hspa9	heat shock protein 9 [Source:MGI Symbol;Acc:MGI:96245]	0.463742
Dus4l	dihydrouridine synthase 4-like (S. cerevisiae) [Source:MGI Symbol;Acc:MGI:1919166]	0.463681
Cdkl2	cyclin-dependent kinase-like 2 (CDC2-related kinase) [Source:MGI Symbol;Acc:MGI:1858227]	0.463335
Fabp5	fatty acid binding protein 5, epidermal [Source:MGI Symbol;Acc:MGI:101790]	0.462765
Ift81	intraflagellar transport 81 homolog (Chlamydomonas) [Source:MGI Symbol;Acc:MGI:1098597]	0.46274
Il6ra	interleukin 6 receptor, alpha [Source:MGI Symbol;Acc:MGI:105304]	0.462429
Otub2	OTU domain, ubiquitin aldehyde binding 2 [Source:MGI Symbol;Acc:MGI:1915399]	0.462378
Chst8	carbohydrate (N-acetylgalactosamine 4-0) sulfotransferase 8 [Source:MGI Symbol;Acc:MGI:1916197]	0.462252
Limch1	LIM and calponin homology domains 1 [Source:MGI Symbol;Acc:MGI:1924819]	0.462158
Gm15672	protein kinase, cAMP dependent regulatory, type I beta [Source:MGI Symbol;Acc:MGI:97759]	0.461488
Rgs12	regulator of G-protein signaling 12 [Source:MGI Symbol;Acc:MGI:1918979]	0.4614
Rpl21	ribosomal protein L21 [Source:MGI Symbol;Acc:MGI:1278340]	0.461306
Lyrm4	LYR motif containing 4 [Source:MGI Symbol;Acc:MGI:2683538]	0.461178
Syngr3	synaptogyrin 3 [Source:MGI Symbol;Acc:MGI:1341881]	0.460949
Ptgis	RIKEN cDNA 1110018N20 gene [Source:MGI Symbol;Acc:MGI:1915753]	0.460542
Fam159a	family with sequence similarity 159, member A [Source:MGI Symbol;Acc:MGI:3651644]	0.459769
Armc6	armadillo repeat containing 6 [Source:MGI Symbol;Acc:MGI:1924063]	0.459603
Sgce	sarcoglycan, epsilon [Source:MGI Symbol;Acc:MGI:1329042]	0.45949
Arhgef37	Rho guanine nucleotide exchange factor (GEF) 37 [Source:MGI Symbol;Acc:MGI:3045339]	0.458341
Cldn23	claudin 23 [Source:MGI Symbol;Acc:MGI:1919158]	0.458292
Slc22a3	solute carrier family 22 (organic cation transporter), member 3 [Source:MGI Symbol;Acc:MGI:1333817]	0.458002
Tsc22d1	TSC22 domain family, member 1 [Source:MGI Symbol;Acc:MGI:109127]	0.45797
Il12rb1	interleukin 12 receptor, beta 1 [Source:MGI Symbol;Acc:MGI:104579]	0.457236
2700081O15Rik	RIKEN cDNA 2700081O15 gene [Source:MGI Symbol;Acc:MGI:1919667]	0.456089
6330416G13Rik	RIKEN cDNA 6330416G13 gene [Source:MGI Symbol;Acc:MGI:1913920]	0.455691
Irak1bp1	interleukin-1 receptor-associated kinase 1 binding protein 1 [Source:MGI Symbol;Acc:MGI:1929475]	0.455605
Zfp964	zinc finger protein 964 [Source:MGI Symbol;Acc:MGI:3646490]	0.454482
Eef2k	eukaryotic elongation factor-2 kinase [Source:MGI Symbol;Acc:MGI:1195261]	0.454211
Gm13247	predicted gene 13247 [Source:MGI Symbol;Acc:MGI:3700965]	0.453379
Shmt2	NADH dehydrogenase (ubiquinone) 1 alpha subcomplex, 4-like 2 [Source:MGI Symbol;Acc:MGI:3039567]	0.453013
Socs5	suppressor of cytokine signaling 5 [Source:MGI Symbol;Acc:MGI:2385459]	0.451618
Aasdh	aminoadipate-semialdehyde dehydrogenase [Source:MGI Symbol;Acc:MGI:2442517]	0.451219
Cutc	COX15 homolog, cytochrome c oxidase assembly protein (yeast) [Source:MGI Symbol;Acc:MGI:1920112]	0.451153
Klf7	Kruppel-like factor 7 (ubiquitous) [Source:MGI Symbol;Acc:MGI:1935151]	0.450886
Gm11974	predicted gene 11974 [Source:MGI Symbol;Acc:MGI:3650059]	0.450629
Ephb4	Eph receptor B4 [Source:MGI Symbol;Acc:MGI:104757]	0.450471
Pvr	poliovirus receptor [Source:MGI Symbol;Acc:MGI:107741]	0.450444
Tceal7	brain expressed gene 1 [Source:MGI Symbol;Acc:MGI:1328321]	0.449365
Lrrc9	leucine rich repeat containing 9 [Source:MGI Symbol;Acc:MGI:1925507]	0.448352
Txndc15	thioredoxin domain containing 15 [Source:MGI Symbol;Acc:MGI:1916922]	0.447749
Ikzf4	IKAROS family zinc finger 4 [Source:MGI Symbol;Acc:MGI:1343139]	0.447267
Zfp704	zinc finger protein 704 [Source:MGI Symbol;Acc:MGI:2180715]	0.446187
Gsto2	WD repeat domain 96 [Source:MGI Symbol;Acc:MGI:1289258]	0.446148
Cux1	cut-like homeobox 1 [Source:MGI Symbol;Acc:MGI:88568]	0.445875
Npas2	neuronal PAS domain protein 2 [Source:MGI Symbol;Acc:MGI:109232]	0.445872
Slc13a4	solute carrier family 13 (sodium/sulfate symporters), member 4 [Source:MGI Symbol;Acc:MGI:2442367]	0.445779
Cpeb3	cytoplasmic polyadenylation element binding protein 3 [Source:MGI Symbol;Acc:MGI:2443075]	0.445535
4930447C04Rik	RIKEN cDNA 4930447C04 gene [Source:MGI Symbol;Acc:MGI:1923051]	0.445512
Hs6st1	heparan sulfate 6-O-sulfotransferase 1 [Source:MGI Symbol;Acc:MGI:1354958]	0.445321
Cdk14	cyclin-dependent kinase 14 [Source:MGI Symbol;Acc:MGI:894318]	0.443546
Dzip3	DAZ interacting protein 3, zinc finger [Source:MGI Symbol;Acc:MGI:1917433]	0.443278
4930432K21Rik	RIKEN cDNA 4930432K21 gene [Source:MGI Symbol;Acc:MGI:1921916]	0.44306
Cldn26	claudin 26 [Source:MGI Symbol;Acc:MGI:1921970]	0.442113
Slco2a1	solute carrier organic anion transporter family, member 2a1 [Source:MGI Symbol;Acc:MGI:1346021]	0.441694
Hdgfrp3	transmembrane 6 superfamily member 1 [Source:MGI Symbol;Acc:MGI:1933209]	0.441286
Gm11019	predicted gene 11019 [Source:MGI Symbol;Acc:MGI:3779239]	0.440634
Rad9	protein phosphatase 1, catalytic subunit, alpha isoform [Source:MGI Symbol;Acc:MGI:103016]	0.44052
Zfyve9	zinc finger, FYVE domain containing 9 [Source:MGI Symbol;Acc:MGI:2652838]	0.440379
Gm14418	predicted gene 14418 [Source:MGI Symbol;Acc:MGI:3702408]	0.439963
Kif21b	kinesin family member 21B [Source:MGI Symbol;Acc:MGI:109234]	0.439835
Erbb2ip	Erbb2 interacting protein [Source:MGI Symbol;Acc:MGI:1890169]	0.438349
Atp8b3	ATPase, class I, type 8B, member 3 [Source:MGI Symbol;Acc:MGI:1914581]	0.43824
Crtac1	cartilage acidic protein 1 [Source:MGI Symbol;Acc:MGI:1920082]	0.436722
Iars	isoleucine-tRNA synthetase [Source:MGI Symbol;Acc:MGI:2145219]	0.436509
Nradd	neurotrophin receptor associated death domain [Source:MGI Symbol;Acc:MGI:1914419]	0.434716
A730085K08Rik	abhydrolase domain containing 5 [Source:MGI Symbol;Acc:MGI:1914719]	0.434222
Gpr35	G protein-coupled receptor 35 [Source:MGI Symbol;Acc:MGI:1929509]	0.433911
Aim2	cell adhesion molecule 3 [Source:MGI Symbol;Acc:MGI:2137858]	0.433244
Ptpn13	protein tyrosine phosphatase, non-receptor type 13 [Source:MGI Symbol;Acc:MGI:103293]	0.432655
Ptch2	patched homolog 2 [Source:MGI Symbol;Acc:MGI:1095405]	0.432265
Prl8a9	prolactin family8, subfamily a, member 9 [Source:MGI Symbol;Acc:MGI:1914560]	0.431879
Trim29	tripartite motif-containing 29 [Source:MGI Symbol;Acc:MGI:1919419]	0.43179
Dnmt3l	autoimmune regulator (autoimmune polyendocrinopathy candidiasis ectodermal dystrophy) [Source:MGI Symbol;Acc:MGI:1338803]	0.431402
Trf	predicted gene 20425 [Source:MGI Symbol;Acc:MGI:5141890]	0.431192
Ctsa	neuralized-like 2 (Drosophila) [Source:MGI Symbol;Acc:MGI:3043305]	0.430622
Syt17	synaptotagmin XVII [Source:MGI Symbol;Acc:MGI:104966]	0.430252
Ovol1	OVO homolog-like 1 (Drosophila) [Source:MGI Symbol;Acc:MGI:1330290]	0.429843
Vgf	VGF nerve growth factor inducible [Source:MGI Symbol;Acc:MGI:1343180]	0.429777
Etos1	fibroblast growth factor receptor 2 [Source:MGI Symbol;Acc:MGI:95523]	0.429449
Ednrb	endothelin receptor type B [Source:MGI Symbol;Acc:MGI:102720]	0.429384
Rgs2	regulator of G-protein signaling 2 [Source:MGI Symbol;Acc:MGI:1098271]	0.427944
Mmp15	matrix metallopeptidase 15 [Source:MGI Symbol;Acc:MGI:109320]	0.427485
Ulk2	Unc-51 like kinase 2 (C. elegans) [Source:MGI Symbol;Acc:MGI:1352758]	0.427459
Apobec3	apolipoprotein B mRNA editing enzyme, catalytic polypeptide 3 [Source:MGI Symbol;Acc:MGI:1933111]	0.427423
Klf6	Kruppel-like factor 6 [Source:MGI Symbol;Acc:MGI:1346318]	0.427106
Ptpn21	protein tyrosine phosphatase, non-receptor type 21 [Source:MGI Symbol;Acc:MGI:1344406]	0.426248
Zfp623	zinc finger protein 623 [Source:MGI Symbol;Acc:MGI:1926084]	0.4258
2610301B20Rik	RIKEN cDNA 2610301B20 gene [Source:MGI Symbol;Acc:MGI:1914407]	0.425797
Mtap1a	microtubule-associated protein 1 A [Source:MGI Symbol;Acc:MGI:1306776]	0.425329
Hdac4	histone deacetylase 4 [Source:MGI Symbol;Acc:MGI:3036234]	0.424543
Mtmr11	myotubularin related protein 11 [Source:MGI Symbol;Acc:MGI:2652817]	0.424447
Rcn3	reticulocalbin 3, EF-hand calcium binding domain [Source:MGI Symbol;Acc:MGI:1277122]	0.4244
Poln	DNA polymerase N [Source:MGI Symbol;Acc:MGI:2675617]	0.423635
Fam178b	RIKEN cDNA D430040D24 gene [Source:MGI Symbol;Acc:MGI:2442526]	0.423443
Gnal	guanine nucleotide binding protein, alpha stimulating, olfactory type [Source:MGI Symbol;Acc:MGI:95774]	0.423437
Ier2	immediate early response 2 [Source:MGI Symbol;Acc:MGI:104815]	0.423075
Eprs	glutamyl-prolyl-tRNA synthetase [Source:MGI Symbol;Acc:MGI:97838]	0.423059
Sgtb	small glutamine-rich tetratricopeptide repeat (TPR)-containing, beta [Source:MGI Symbol;Acc:MGI:2444615]	0.422936
Krtcap2	tripartite motif-containing 46 [Source:MGI Symbol;Acc:MGI:2673000]	0.42285
Vav3	vav 3 oncogene [Source:MGI Symbol;Acc:MGI:1888518]	0.421394
Tmem138	transmembrane protein 138 [Source:MGI Symbol;Acc:MGI:1920232]	0.421017
Zfp709	zinc finger protein 709 [Source:MGI Symbol;Acc:MGI:2384299]	0.420532
Gm12359	male-specific lethal 1 homolog (Drosophila) [Source:MGI Symbol;Acc:MGI:1921276]	0.420087
Bend6	BEN domain containing 6 [Source:MGI Symbol;Acc:MGI:2444572]	0.419717
Mettl22	methyltransferase like 22 [Source:MGI Symbol;Acc:MGI:2384301]	0.418132
Atf6	activating transcription factor 6 [Source:MGI Symbol;Acc:MGI:1926157]	0.417756
2010002N04Rik	RIKEN cDNA 2010002N04 gene [Source:MGI Symbol;Acc:MGI:1917088]	0.415536
Gtf2i	general transcription factor II I [Source:MGI Symbol;Acc:MGI:1202722]	0.415295
Rad9b	PTC7 protein phosphatase homolog (S. cerevisiae) [Source:MGI Symbol;Acc:MGI:2444593]	0.414615
Bre	mitochondrial ribosomal protein L33 [Source:MGI Symbol;Acc:MGI:2137225]	0.414459
Atp2b4	ATPase, Ca++ transporting, plasma membrane 4 [Source:MGI Symbol;Acc:MGI:88111]	0.414249
Gm15491	nucleoplasmin 3 [Source:MGI Symbol;Acc:MGI:894653]	0.413558
AC158220.1	zinc finger protein 850 [Source:RefSeq peptide;Acc:NP_001241880]	0.413201
Stard6	RIKEN cDNA 4930503L19 gene [Source:MGI Symbol;Acc:MGI:1922045]	0.413054
Rfesd	Rieske (Fe-S) domain containing [Source:MGI Symbol;Acc:MGI:2145198]	0.412163
Six3	Six3 opposite strand transcript 1 [Source:MGI Symbol;Acc:MGI:1925118]	0.411414
Psph	phosphoserine phosphatase [Source:MGI Symbol;Acc:MGI:97788]	0.410662
0610012D04Rik	tetratricopeptide repeat domain 7 [Source:MGI Symbol;Acc:MGI:1920999]	0.410342
Gas2	Fanconi anemia, complementation group F [Source:MGI Symbol;Acc:MGI:3689889]	0.410211
Tars	threonyl-tRNA synthetase [Source:MGI Symbol;Acc:MGI:106314]	0.409995
Btbd1	BTB (POZ) domain containing 1 [Source:MGI Symbol;Acc:MGI:1933765]	0.409885
Marveld1	MARVEL (membrane-associating) domain containing 1 [Source:MGI Symbol;Acc:MGI:2147570]	0.409067
Slc7a3	solute carrier family 7 (cationic amino acid transporter, y+ system), member 3 [Source:MGI Symbol;Acc:MGI:1100521]	0.408825
1500002C15Rik	Ssu72 RNA polymerase II CTD phosphatase homolog (yeast) [Source:MGI Symbol;Acc:MGI:1916241]	0.408619
Pvrl4	poliovirus receptor-related 4 [Source:MGI Symbol;Acc:MGI:1918990]	0.408392
Slc24a3	solute carrier family 24 (sodium/potassium/calcium exchanger), member 3 [Source:MGI Symbol;Acc:MGI:2137513]	0.408081
Gm9897	predicted gene 9897 [Source:MGI Symbol;Acc:MGI:3704243]	0.407754
Dll3	delta-like 3 (Drosophila) [Source:MGI Symbol;Acc:MGI:1096877]	0.407719
Car2	carbonic anhydrase 2 [Source:MGI Symbol;Acc:MGI:88269]	0.406497
Gata1	GATA binding protein 1 [Source:MGI Symbol;Acc:MGI:95661]	0.40632
Bcat1	branched chain aminotransferase 1, cytosolic [Source:MGI Symbol;Acc:MGI:104861]	0.406197
Wars	tryptophanyl-tRNA synthetase [Source:MGI Symbol;Acc:MGI:104630]	0.405634
Phf10	RIKEN cDNA 1600012H06 gene [Source:MGI Symbol;Acc:MGI:1915162]	0.404733
Prss42	protease, serine, 42 [Source:MGI Symbol;Acc:MGI:2665280]	0.404658
Prph	peripherin [Source:MGI Symbol;Acc:MGI:97774]	0.400275
S100a14	S100 calcium binding protein A14 [Source:MGI Symbol;Acc:MGI:1913416]	0.399486
D930014E17Rik	RIKEN cDNA D930014E17 gene [Source:MGI Symbol;Acc:MGI:3041226]	0.399323
Aars	alanyl-tRNA synthetase [Source:MGI Symbol;Acc:MGI:2384560]	0.399206
Pax8	paired box gene 8 [Source:MGI Symbol;Acc:MGI:97492]	0.398952
St6gal1	cDNA sequence BC106179 [Source:MGI Symbol;Acc:MGI:3702726]	0.398561
Eml5	zinc finger CCCH type containing 14 [Source:MGI Symbol;Acc:MGI:1919824]	0.398038
Brca2	breast cancer 2 [Source:MGI Symbol;Acc:MGI:109337]	0.397035
Slc40a1	solute carrier family 40 (iron-regulated transporter), member 1 [Source:MGI Symbol;Acc:MGI:1315204]	0.396855
Ifrd1	interferon-related developmental regulator 1 [Source:MGI Symbol;Acc:MGI:1316717]	0.396494
Acot2	acyl-CoA thioesterase 2 [Source:MGI Symbol;Acc:MGI:2159605]	0.396446
Prrg1	proline rich Gla (G-carboxyglutamic acid) 1 [Source:MGI Symbol;Acc:MGI:1917364]	0.396406
Ccdc18	coiled-coil domain containing 18 [Source:MGI Symbol;Acc:MGI:1922974]	0.395904
Slc41a2	solute carrier family 41, member 2 [Source:MGI Symbol;Acc:MGI:2442940]	0.395629
Sdk2	sidekick homolog 2 (chicken) [Source:MGI Symbol;Acc:MGI:2443847]	0.395603
5930412G12Rik	RIKEN cDNA 5930412G12 gene [Source:MGI Symbol;Acc:MGI:2442398]	0.394945
Ttll13	tubulin tyrosine ligase-like family, member 13 [Source:MGI Symbol;Acc:MGI:1920845]	0.394507
Thtpa	thiamine triphosphatase [Source:MGI Symbol;Acc:MGI:2446078]	0.393908
Egln3	EGL nine homolog 3 (C. elegans) [Source:MGI Symbol;Acc:MGI:1932288]	0.392862
Hist3h2a	tripartite motif-containing 17 [Source:MGI Symbol;Acc:MGI:1861440]	0.39252
Bhlha15	basic helix-loop-helix family, member a15 [Source:MGI Symbol;Acc:MGI:891976]	0.391289
Rlbp1	retinaldehyde binding protein 1 [Source:MGI Symbol;Acc:MGI:97930]	0.39076
Sesn2	sestrin 2 [Source:MGI Symbol;Acc:MGI:2651874]	0.390248
Brsk2	BR serine/threonine kinase 2 [Source:MGI Symbol;Acc:MGI:1923020]	0.389923
Adamts20	a disintegrin-like and metallopeptidase (reprolysin type) with thrombospondin type 1 motif, 20 [Source:MGI Symbol;Acc:MGI:2660628]	0.389797
Prmt7	protein arginine N-methyltransferase 7 [Source:MGI Symbol;Acc:MGI:2384879]	0.38869
E130307A14Rik	TRAF3 interacting protein 2 [Source:MGI Symbol;Acc:MGI:2143599]	0.388646
Enpp1	ectonucleotide pyrophosphatase/phosphodiesterase 1 [Source:MGI Symbol;Acc:MGI:97370]	0.388525
Mkrn3	makorin, ring finger protein, 3 [Source:MGI Symbol;Acc:MGI:2181178]	0.387469
Slc38a4	solute carrier family 38, member 4 [Source:MGI Symbol;Acc:MGI:1916604]	0.387365
Bsn	bassoon [Source:MGI Symbol;Acc:MGI:1277955]	0.386879
Zim1	zinc finger, imprinted 1 [Source:MGI Symbol;Acc:MGI:1341879]	0.386744
Elf5	E74-like factor 5 [Source:MGI Symbol;Acc:MGI:1335079]	0.386532
2006-03-01	membrane-associated ring finger (C3HC4) 6 [Source:MGI Symbol;Acc:MGI:2442773]	0.386007
Katnal1	katanin p60 subunit A-like 1 [Source:MGI Symbol;Acc:MGI:2387638]	0.38497
Hrk	harakiri, BCL2 interacting protein (contains only BH3 domain) [Source:MGI Symbol;Acc:MGI:1201608]	0.384709
Fbn2	fibrillin 2 [Source:MGI Symbol;Acc:MGI:95490]	0.384008
Cabp1	calcium binding protein 1 [Source:MGI Symbol;Acc:MGI:1352750]	0.383129
Slc3a2	solute carrier family 3 (activators of dibasic and neutral amino acid transport), member 2 [Source:MGI Symbol;Acc:MGI:96955]	0.383033
Fam187b	lipolysis stimulated lipoprotein receptor [Source:MGI Symbol;Acc:MGI:1927471]	0.381682
Golt1a	golgi transport 1 homolog A (S. cerevisiae) [Source:MGI Symbol;Acc:MGI:1915588]	0.381098
Prokr1	prokineticin receptor 1 [Source:MGI Symbol;Acc:MGI:1929676]	0.380659
Scara5	scavenger receptor class A, member 5 (putative) [Source:MGI Symbol;Acc:MGI:1918395]	0.380169
Fzd1	frizzled homolog 1 (Drosophila) [Source:MGI Symbol;Acc:MGI:1196625]	0.379356
Sycp2	synaptonemal complex protein 2 [Source:MGI Symbol;Acc:MGI:1933281]	0.378942
Gm14206	predicted gene 14206 [Source:MGI Symbol;Acc:MGI:3649549]	0.378053
Akna	AT-hook transcription factor [Source:MGI Symbol;Acc:MGI:2140340]	0.377986
Elac1	elaC homolog 1 (E. coli) [Source:MGI Symbol;Acc:MGI:1890495]	0.376858
Hexa	hexosaminidase A [Source:MGI Symbol;Acc:MGI:96073]	0.376813
Slc22a21	solute carrier family 22 (organic cation transporter), member 21 [Source:MGI Symbol;Acc:MGI:1929481]	0.376516
Grik3	glutamate receptor, ionotropic, kainate 3 [Source:MGI Symbol;Acc:MGI:95816]	0.375799
Kcnf1	potassium voltage-gated channel, subfamily F, member 1 [Source:MGI Symbol;Acc:MGI:2687399]	0.375549
BC067074	cDNA sequence BC067074 [Source:MGI Symbol;Acc:MGI:3040697]	0.375358
Ank2	ankyrin 2, brain [Source:MGI Symbol;Acc:MGI:88025]	0.374891
Zdhhc15	zinc finger, DHHC domain containing 15 [Source:MGI Symbol;Acc:MGI:1915336]	0.374848
Gadd45g	growth arrest and DNA-damage-inducible 45 gamma [Source:MGI Symbol;Acc:MGI:1346325]	0.374771
Tead1	RIKEN cDNA 2310014F06 gene [Source:MGI Symbol;Acc:MGI:1916875]	0.374549
H2-Q7	histocompatibility 2, Q region locus 7 [Source:MGI Symbol;Acc:MGI:95936]	0.373072
6330403L08Rik	platelet derived growth factor, alpha [Source:MGI Symbol;Acc:MGI:97527]	0.372738
Kiss1	golgi transport 1 homolog A (S. cerevisiae) [Source:MGI Symbol;Acc:MGI:1915588]	0.37193
Letm2	leucine zipper-EF-hand containing transmembrane protein 2 [Source:MGI Symbol;Acc:MGI:2444979]	0.371497
Flt1	FMS-like tyrosine kinase 1 [Source:MGI Symbol;Acc:MGI:95558]	0.37147
N4bp3	NEDD4 binding protein 3 [Source:MGI Symbol;Acc:MGI:2442218]	0.369411
Mettl9	predicted gene 9905 [Source:MGI Symbol;Acc:MGI:3642311]	0.369326
Gm10762	predicted gene 10762 [Source:MGI Symbol;Acc:MGI:3704209]	0.367568
Aldh5a1	RIKEN cDNA 4932702P03 gene [Source:MGI Symbol;Acc:MGI:1921673]	0.36722
Xpot	exportin, tRNA (nuclear export receptor for tRNAs) [Source:MGI Symbol;Acc:MGI:1920442]	0.366305
Det1	de-etiolated homolog 1 (Arabidopsis) [Source:MGI Symbol;Acc:MGI:1923625]	0.36562
Flt3	FMS-like tyrosine kinase 3 [Source:MGI Symbol;Acc:MGI:95559]	0.365129
Dnajb4	DnaJ (Hsp40) homolog, subfamily B, member 4 [Source:MGI Symbol;Acc:MGI:1914285]	0.36438
Peg3	paternally expressed 3 [Source:MGI Symbol;Acc:MGI:104748]	0.363643
Slc7a1	solute carrier family 7 (cationic amino acid transporter, y+ system), member 1 [Source:MGI Symbol;Acc:MGI:88117]	0.363564
Dpp6	dipeptidylpeptidase 6 [Source:MGI Symbol;Acc:MGI:94921]	0.363143
Ndn	necdin [Source:MGI Symbol;Acc:MGI:97290]	0.361895
Pdgfrb	platelet derived growth factor receptor, beta polypeptide [Source:MGI Symbol;Acc:MGI:97531]	0.361097
Nars	asparaginyl-tRNA synthetase [Source:MGI Symbol;Acc:MGI:1917473]	0.360322
Zfp945	zinc finger protein 945 [Source:MGI Symbol;Acc:MGI:2445132]	0.359752
Cebpg	CCAAT/enhancer binding protein (C/EBP), gamma [Source:MGI Symbol;Acc:MGI:104982]	0.357748
Rnf32	ring finger protein 32 [Source:MGI Symbol;Acc:MGI:1861747]	0.355265
Hnrnph3	RUN and FYVE domain-containing 2 [Source:MGI Symbol;Acc:MGI:1917682]	0.355244
Ccdc13	coiled-coil domain containing 13 [Source:MGI Symbol;Acc:MGI:1920144]	0.354988
Lrrc8b	leucine rich repeat containing 8 family, member B [Source:MGI Symbol;Acc:MGI:2141353]	0.354681
Rgl1	ral guanine nucleotide dissociation stimulator,-like 1 [Source:MGI Symbol;Acc:MGI:107484]	0.354442
Nhlrc1	NHL repeat containing 1 [Source:MGI Symbol;Acc:MGI:2145264]	0.352576
Ccdc36	coiled-coil domain containing 36 [Source:MGI Symbol;Acc:MGI:3612242]	0.350811
Dnajb3	UDP glycosyltransferase 1 family, polypeptide A10 [Source:MGI Symbol;Acc:MGI:3580642]	0.350627
Gm9958	predicted gene 9958 [Source:MGI Symbol;Acc:MGI:3641866]	0.350246
Iqck	RIKEN cDNA 2310008H09 gene [Source:MGI Symbol;Acc:MGI:1913606]	0.348048
Pkd2l1	polycystic kidney disease 2-like 1 [Source:MGI Symbol;Acc:MGI:1352448]	0.347414
Zhx2	zinc fingers and homeoboxes 2 [Source:MGI Symbol;Acc:MGI:2683087]	0.347324
Itfg2	integrin alpha FG-GAP repeat containing 2 [Source:MGI Symbol;Acc:MGI:1915450]	0.34659
Cited4	Cbp/p300-interacting transactivator, with Glu/Asp-rich carboxy-terminal domain, 4 [Source:MGI Symbol;Acc:MGI:1861694]	0.345522
Trim17	tripartite motif-containing 17 [Source:MGI Symbol;Acc:MGI:1861440]	0.344891
Adora1	myosin binding protein H [Source:MGI Symbol;Acc:MGI:1858196]	0.344664
4932425I24Rik	RIKEN cDNA 4932425I24 gene [Source:MGI Symbol;Acc:MGI:2443598]	0.343493
Uty	ubiquitously transcribed tetratricopeptide repeat gene, Y chromosome [Source:MGI Symbol;Acc:MGI:894810]	0.342589
Slc7a2	solute carrier family 7 (cationic amino acid transporter, y+ system), member 2 [Source:MGI Symbol;Acc:MGI:99828]	0.340485
AC240744.2	No description	0.340458
Dennd1c	DENN/MADD domain containing 1C [Source:MGI Symbol;Acc:MGI:1918035]	0.339467
Il1a	predicted gene 14023 [Source:MGI Symbol;Acc:MGI:3650639]	0.339383
Sirt3	resistance to inhibitors of cholinesterase 8 homolog (C. elegans) [Source:MGI Symbol;Acc:MGI:2141866]	0.338763
Dpcr1	surfactant associated 2 [Source:MGI Symbol;Acc:MGI:3643293]	0.338518
Aff1	AF4/FMR2 family, member 1 [Source:MGI Symbol;Acc:MGI:1100819]	0.337728
Zmat4	zinc finger, matrin type 4 [Source:MGI Symbol;Acc:MGI:2443497]	0.336456
S1pr1	sphingosine-1-phosphate receptor 1 [Source:MGI Symbol;Acc:MGI:1096355]	0.336252
Fmnl2	formin-like 2 [Source:MGI Symbol;Acc:MGI:1918659]	0.335488
Rab30	RAB30, member RAS oncogene family [Source:MGI Symbol;Acc:MGI:1923235]	0.335378
Dclk2	doublecortin-like kinase 2 [Source:MGI Symbol;Acc:MGI:1918012]	0.335075
Dmrt3	doublesex and mab-3 related transcription factor 3 [Source:MGI Symbol;Acc:MGI:2449470]	0.334679
Nr2c1	nuclear receptor subfamily 2, group C, member 1 [Source:MGI Symbol;Acc:MGI:1352465]	0.334659
Wt1	Wilms tumor 1 homolog [Source:MGI Symbol;Acc:MGI:98968]	0.334524
Fam71f1	family with sequence similarity 71, member F1 [Source:MGI Symbol;Acc:MGI:3032524]	0.334054
Prune2	prune homolog 2 (Drosophila) [Source:MGI Symbol;Acc:MGI:1925004]	0.332845
Tesc	tescalcin [Source:MGI Symbol;Acc:MGI:1930803]	0.329822
Fbxw4	deleted in primary ciliary dyskinesia [Source:MGI Symbol;Acc:MGI:1924407]	0.328353
Slit3	slit homolog 3 (Drosophila) [Source:MGI Symbol;Acc:MGI:1315202]	0.328211
C1ql2	complement component 1, q subcomponent-like 2 [Source:MGI Symbol;Acc:MGI:3032521]	0.327559
Kctd15	potassium channel tetramerisation domain containing 15 [Source:MGI Symbol;Acc:MGI:2385276]	0.327513
Arrdc4	arrestin domain containing 4 [Source:MGI Symbol;Acc:MGI:1913662]	0.327101
Klrg2	killer cell lectin-like receptor subfamily G, member 2 [Source:MGI Symbol;Acc:MGI:1921503]	0.326784
Klf2	Kruppel-like factor 2 (lung) [Source:MGI Symbol;Acc:MGI:1342772]	0.326178
AC241392.2	No description	0.324503
Dsg3	desmoglein 3 [Source:MGI Symbol;Acc:MGI:99499]	0.324396
AC139157.1	membrane protein, palmitoylated 7 (MAGUK p55 subfamily member 7) [Source:MGI Symbol;Acc:MGI:1922989]	0.324343
A730085A09Rik	KN motif and ankyrin repeat domains 4 [Source:MGI Symbol;Acc:MGI:3043381]	0.324148
Dnahc8	dynein, axonemal, heavy chain 8 [Source:MGI Symbol;Acc:MGI:107714]	0.321339
Irx1	Iroquois related homeobox 1 (Drosophila) [Source:MGI Symbol;Acc:MGI:1197515]	0.31794
Zdhhc1	zinc finger, DHHC domain containing 1 [Source:MGI Symbol;Acc:MGI:1918046]	0.315994
Gtpbp2	GTP binding protein 2 [Source:MGI Symbol;Acc:MGI:1860138]	0.315783
Pappa	pregnancy-associated plasma protein A [Source:MGI Symbol;Acc:MGI:97479]	0.315232
Txnip	predicted gene 15441 [Source:MGI Symbol;Acc:MGI:3641753]	0.314707
2410006H16Rik	RIKEN cDNA 2410006H16 gene [Source:MGI Symbol;Acc:MGI:1916471]	0.313991
Atp4a	ATPase, H+/K+ exchanging, gastric, alpha polypeptide [Source:MGI Symbol;Acc:MGI:88113]	0.313905
Fkbp10	FK506 binding protein 10 [Source:MGI Symbol;Acc:MGI:104769]	0.313337
Slamf9	SLAM family member 9 [Source:MGI Symbol;Acc:MGI:1923692]	0.312218
Acap1	ArfGAP with coiled-coil, ankyrin repeat and PH domains 1 [Source:MGI Symbol;Acc:MGI:2388270]	0.311344
Aldh18a1	aldehyde dehydrogenase 18 family, member A1 [Source:MGI Symbol;Acc:MGI:1888908]	0.311015
4933403G14Rik	RIKEN cDNA 4933403G14 gene [Source:MGI Symbol;Acc:MGI:1921643]	0.307119
Ctgf	predicted gene 15270 [Source:MGI Symbol;Acc:MGI:3705149]	0.306717
Adad2	adenosine deaminase domain containing 2 [Source:MGI Symbol;Acc:MGI:1923023]	0.305651
Gm5602	fibroblast growth factor receptor 2 [Source:MGI Symbol;Acc:MGI:95523]	0.305382
Egf	epidermal growth factor [Source:MGI Symbol;Acc:MGI:95290]	0.305228
Armcx4	armadillo repeat containing, X-linked 4 [Source:MGI Symbol;Acc:MGI:2147887]	0.304448
Hes1	hairy and enhancer of split 1 (Drosophila) [Source:MGI Symbol;Acc:MGI:104853]	0.303763
Sec31b	Sec31 homolog B (S. cerevisiae) [Source:MGI Symbol;Acc:MGI:2685187]	0.303673
Kdr	kinase insert domain protein receptor [Source:MGI Symbol;Acc:MGI:96683]	0.303606
Tspyl4	5'-nucleotidase domain containing 1 [Source:MGI Symbol;Acc:MGI:2442446]	0.302151
Cdh4	cadherin 4 [Source:MGI Symbol;Acc:MGI:99218]	0.301632
Fcgr3	Fc receptor, IgG, low affinity III [Source:MGI Symbol;Acc:MGI:95500]	0.301458
D430041D05Rik	RIKEN cDNA D430041D05 gene [Source:MGI Symbol;Acc:MGI:2181743]	0.301349
Ddit3	predicted gene 4189 [Source:MGI Symbol;Acc:MGI:3782365]	0.301279
Trmt61b	speedy homolog A (Xenopus laevis) [Source:MGI Symbol;Acc:MGI:1918141]	0.301053
Pcbd2	pterin 4 alpha carbinolamine dehydratase/dimerization cofactor of hepatocyte nuclear factor 1 alpha (TCF1) 2 [Source:MGI Symbol;Acc:MGI:1919812]	0.300809
Rgs16	regulator of G-protein signaling 16 [Source:MGI Symbol;Acc:MGI:108407]	0.300334
Hapln3	hyaluronan and proteoglycan link protein 3 [Source:MGI Symbol;Acc:MGI:1914916]	0.299787
Ptgir	prostaglandin I receptor (IP) [Source:MGI Symbol;Acc:MGI:99535]	0.2996
Prss23	protease, serine, 23 [Source:MGI Symbol;Acc:MGI:1923703]	0.298618
AC150897.1	No description	0.297629
Brdt	bromodomain, testis-specific [Source:MGI Symbol;Acc:MGI:1891374]	0.296956
Gm6483	predicted gene 6483 [Source:MGI Symbol;Acc:MGI:3644574]	0.296713
Steap2	six transmembrane epithelial antigen of prostate 2 [Source:MGI Symbol;Acc:MGI:1921301]	0.296518
Gm10664	tripartite motif-containing 60 [Source:MGI Symbol;Acc:MGI:2387430]	0.296357
Mapk4	mitogen-activated protein kinase 4 [Source:MGI Symbol;Acc:MGI:2444559]	0.296216
Tbx1	T-box 1 [Source:MGI Symbol;Acc:MGI:98493]	0.294532
Id3	inhibitor of DNA binding 3 [Source:MGI Symbol;Acc:MGI:96398]	0.294129
Calr3	calreticulin 3 [Source:MGI Symbol;Acc:MGI:1920566]	0.293151
Osbpl6	oxysterol binding protein-like 6 [Source:MGI Symbol;Acc:MGI:2139014]	0.292963
Esrrb	estrogen related receptor, beta [Source:MGI Symbol;Acc:MGI:1346832]	0.292713
Izumo1	izumo sperm-egg fusion 1 [Source:MGI Symbol;Acc:MGI:1920706]	0.291571
Ttc18	tetratricopeptide repeat domain 18 [Source:MGI Symbol;Acc:MGI:1923920]	0.291198
Nfib	nuclear factor I/B [Source:MGI Symbol;Acc:MGI:103188]	0.289539
Zfp532	zinc finger protein 532 [Source:MGI Symbol;Acc:MGI:3036282]	0.28831
Slc6a17	solute carrier family 6 (neurotransmitter transporter), member 17 [Source:MGI Symbol;Acc:MGI:2442535]	0.288204
Psat1	phosphoserine aminotransferase 1 [Source:MGI Symbol;Acc:MGI:2183441]	0.288173
Cd37	TEA domain family member 2 [Source:MGI Symbol;Acc:MGI:104904]	0.28753
Foxc2	predicted gene 20388 [Source:MGI Symbol;Acc:MGI:5141853]	0.287407
Ripk3	receptor-interacting serine-threonine kinase 3 [Source:MGI Symbol;Acc:MGI:2154952]	0.28514
C530008M17Rik	predicted gene 10430 [Source:MGI Symbol;Acc:MGI:3711274]	0.284843
Fndc3c1	fibronectin type III domain containing 3C1 [Source:MGI Symbol;Acc:MGI:2685630]	0.284413
Myl9	myosin, light polypeptide 9, regulatory [Source:MGI Symbol;Acc:MGI:2138915]	0.283254
Tubb4a	tubulin, beta 4A class IVA [Source:MGI Symbol;Acc:MGI:107848]	0.283124
Herpud1	predicted gene 15890 [Source:MGI Symbol;Acc:MGI:3802160]	0.280515
Fut2	fucosyltransferase 2 [Source:MGI Symbol;Acc:MGI:109374]	0.278869
Nek5	NIMA (never in mitosis gene a)-related expressed kinase 5 [Source:MGI Symbol;Acc:MGI:2142824]	0.278796
Trim46	tripartite motif-containing 46 [Source:MGI Symbol;Acc:MGI:2673000]	0.278075
Chn1	predicted gene 13704 [Source:MGI Symbol;Acc:MGI:3705094]	0.278017
Maf	avian musculoaponeurotic fibrosarcoma (v-maf) AS42 oncogene homolog [Source:MGI Symbol;Acc:MGI:96909]	0.27648
Cacna1e	calcium channel, voltage-dependent, R type, alpha 1E subunit [Source:MGI Symbol;Acc:MGI:106217]	0.27582
Calml3	calmodulin-like 3 [Source:MGI Symbol;Acc:MGI:1917655]	0.275292
Fndc4	fibronectin type III domain containing 4 [Source:MGI Symbol;Acc:MGI:1917195]	0.274168
Rassf6	Ras association (RalGDS/AF-6) domain family member 6 [Source:MGI Symbol;Acc:MGI:1920496]	0.271867
Tmem22	transmembrane protein 22 [Source:MGI Symbol;Acc:MGI:2685365]	0.27102
Vim	vimentin [Source:MGI Symbol;Acc:MGI:98932]	0.270761
Star	steroidogenic acute regulatory protein [Source:MGI Symbol;Acc:MGI:102760]	0.269855
Gpr124	G protein-coupled receptor 124 [Source:MGI Symbol;Acc:MGI:1925810]	0.26904
9930038B18Rik	RIKEN cDNA 9930038B18 gene [Source:MGI Symbol;Acc:MGI:2442156]	0.268289
Sft2d2	SFT2 domain containing 2 [Source:MGI Symbol;Acc:MGI:1917362]	0.265724
Cyb5r1	cytochrome b5 reductase 1 [Source:MGI Symbol;Acc:MGI:1919267]	0.26552
Cyp17a1	cytochrome P450, family 17, subfamily a, polypeptide 1 [Source:MGI Symbol;Acc:MGI:88586]	0.264281
P2rx3	purinergic receptor P2X, ligand-gated ion channel, 3 [Source:MGI Symbol;Acc:MGI:1097160]	0.263411
G0s2	G0/G1 switch gene 2 [Source:MGI Symbol;Acc:MGI:1316737]	0.262603
Cage1	cancer antigen 1 [Source:MGI Symbol;Acc:MGI:1918463]	0.262347
A630014C17Rik	transcription factor 7, T cell specific [Source:MGI Symbol;Acc:MGI:98507]	0.259841
Pck2	phosphoenolpyruvate carboxykinase 2 (mitochondrial) [Source:MGI Symbol;Acc:MGI:1860456]	0.258857
Cdc42ep5	CDC42 effector protein (Rho GTPase binding) 5 [Source:MGI Symbol;Acc:MGI:1929745]	0.257467
Leng9	leukocyte receptor cluster (LRC) member 9 [Source:MGI Symbol;Acc:MGI:2444509]	0.25679
Pla2g4a	phospholipase A2, group IVA (cytosolic, calcium-dependent) [Source:MGI Symbol;Acc:MGI:1195256]	0.256549
Gm239	predicted gene 239 [Source:MGI Symbol;Acc:MGI:2685085]	0.255306
Rasip1	izumo sperm-egg fusion 1 [Source:MGI Symbol;Acc:MGI:1920706]	0.253006
9130230N09Rik	COMM domain containing 1 [Source:MGI Symbol;Acc:MGI:109474]	0.248163
4922505G16Rik	RIKEN cDNA 4922505G16 gene [Source:MGI Symbol;Acc:MGI:3603828]	0.247549
Odz4	odd Oz/ten-m homolog 4 (Drosophila) [Source:MGI Symbol;Acc:MGI:2447063]	0.247504
Lpar6	retinoblastoma 1 [Source:MGI Symbol;Acc:MGI:97874]	0.242963
Xlr3c	X-linked lymphocyte-regulated 5A [Source:MGI Symbol;Acc:MGI:3574108]	0.242896
Magi2	membrane associated guanylate kinase, WW and PDZ domain containing 2 [Source:MGI Symbol;Acc:MGI:1354953]	0.241151
As3mt	arsenic (+3 oxidation state) methyltransferase [Source:MGI Symbol;Acc:MGI:1929882]	0.239524
Pfn4	profilin family, member 4 [Source:MGI Symbol;Acc:MGI:1920121]	0.239483
Pde4b	phosphodiesterase 4B, cAMP specific [Source:MGI Symbol;Acc:MGI:99557]	0.238489
Steap1	six transmembrane epithelial antigen of the prostate 1 [Source:MGI Symbol;Acc:MGI:1917608]	0.238318
Ccdc103	coiled-coil domain containing 103 [Source:MGI Symbol;Acc:MGI:1920543]	0.237391
H19	H19 fetal liver mRNA [Source:MGI Symbol;Acc:MGI:95891]	0.237286
Gm15559	predicted gene 15559 [Source:MGI Symbol;Acc:MGI:3783008]	0.233786
Slc39a8	solute carrier family 39 (metal ion transporter), member 8 [Source:MGI Symbol;Acc:MGI:1914797]	0.233122
Itk	IL2 inducible T cell kinase [Source:MGI Symbol;Acc:MGI:96621]	0.230305
Slc1a4	solute carrier family 1 (glutamate/neutral amino acid transporter), member 4 [Source:MGI Symbol;Acc:MGI:2135601]	0.230049
Gfra3	glial cell line derived neurotrophic factor family receptor alpha 3 [Source:MGI Symbol;Acc:MGI:1201403]	0.229793
Zcchc12	zinc finger, CCHC domain containing 12 [Source:MGI Symbol;Acc:MGI:1919943]	0.229379
Igfbp5	insulin-like growth factor binding protein 5 [Source:MGI Symbol;Acc:MGI:96440]	0.228577
Cntd1	coiled-coil domain containing 56 [Source:MGI Symbol;Acc:MGI:1098757]	0.227395
Nrp2	neuropilin 2 [Source:MGI Symbol;Acc:MGI:1100492]	0.227309
Lrrc8d	leucine rich repeat containing 8D [Source:MGI Symbol;Acc:MGI:1922368]	0.227247
Atf5	activating transcription factor 5 [Source:MGI Symbol;Acc:MGI:2141857]	0.22646
Colq	collagen-like tail subunit (single strand of homotrimer) of asymmetric acetylcholinesterase [Source:MGI Symbol;Acc:MGI:1338761]	0.226062
Sgms2	sphingomyelin synthase 2 [Source:MGI Symbol;Acc:MGI:1921692]	0.225166
Pde4d	phosphodiesterase 4D, cAMP specific [Source:MGI Symbol;Acc:MGI:99555]	0.223711
Zfp629	zinc finger protein 629 [Source:MGI Symbol;Acc:MGI:2444524]	0.220664
Ush1c	Usher syndrome 1C homolog (human) [Source:MGI Symbol;Acc:MGI:1919338]	0.217306
3830408C21Rik	RIKEN cDNA 3830408C21 gene [Source:MGI Symbol;Acc:MGI:1917940]	0.215376
Il17rd	interleukin 17 receptor D [Source:MGI Symbol;Acc:MGI:2159727]	0.215236
Sh2d6	SH2 domain containing 6 [Source:MGI Symbol;Acc:MGI:1918380]	0.214249
Cntfr	ciliary neurotrophic factor receptor [Source:MGI Symbol;Acc:MGI:99605]	0.213336
1700016H13Rik	RIKEN cDNA 1700016H13 gene [Source:MGI Symbol;Acc:MGI:1921468]	0.21204
Insm1	insulinoma-associated 1 [Source:MGI Symbol;Acc:MGI:1859980]	0.210509
Gm17484	predicted gene, 17484 [Source:MGI Symbol;Acc:MGI:4937118]	0.210081
Exd1	exonuclease 3'-5' domain containing 1 [Source:MGI Symbol;Acc:MGI:3045306]	0.206021
4930458D05Rik	RIKEN cDNA 4930458D05 gene [Source:MGI Symbol;Acc:MGI:1923052]	0.205594
Gdf15	growth differentiation factor 15 [Source:MGI Symbol;Acc:MGI:1346047]	0.205221
Gm14164	predicted gene 14164 [Source:MGI Symbol;Acc:MGI:3650730]	0.204741
Gm14322	predicted gene 14322 [Source:MGI Symbol;Acc:MGI:3652185]	0.204507
Rasgrf1	RAS protein-specific guanine nucleotide-releasing factor 1 [Source:MGI Symbol;Acc:MGI:99694]	0.202636
Gm15676	predicted gene 15676 [Source:MGI Symbol;Acc:MGI:3783118]	0.201355
Rasgrf2	RAS protein-specific guanine nucleotide-releasing factor 2 [Source:MGI Symbol;Acc:MGI:109137]	0.197056
Nupr1	nuclear protein 1 [Source:MGI Symbol;Acc:MGI:1891834]	0.196017
Adra2c	adrenergic receptor, alpha 2c [Source:MGI Symbol;Acc:MGI:87936]	0.194361
Ccl28	chemokine (C-C motif) ligand 28 [Source:MGI Symbol;Acc:MGI:1861731]	0.193393
Diras2	DIRAS family, GTP-binding RAS-like 2 [Source:MGI Symbol;Acc:MGI:1915453]	0.19335
Stc2	stanniocalcin 2 [Source:MGI Symbol;Acc:MGI:1316731]	0.193298
Pycr1	pyrroline-5-carboxylate reductase 1 [Source:MGI Symbol;Acc:MGI:2384795]	0.188729
4930438A08Rik	RIKEN cDNA 4930438A08 gene [Source:MGI Symbol;Acc:MGI:1921238]	0.188533
Fgfbp3	fibroblast growth factor binding protein 3 [Source:MGI Symbol;Acc:MGI:1919764]	0.188002
Trib3	tribbles homolog 3 (Drosophila) [Source:MGI Symbol;Acc:MGI:1345675]	0.185211
Serpind1	phosphatidylinositol 4-kinase, catalytic, alpha polypeptide [Source:MGI Symbol;Acc:MGI:2448506]	0.1805
Olah	oleoyl-ACP hydrolase [Source:MGI Symbol;Acc:MGI:2139018]	0.180399
Serpinb6c	serine (or cysteine) peptidase inhibitor, clade B, member 6c [Source:MGI Symbol;Acc:MGI:2145481]	0.179803
BC021614	cDNA sequence BC021614 [Source:MGI Symbol;Acc:MGI:2385078]	0.179327
BC049730	cDNA sequence BC049730 [Source:MGI Symbol;Acc:MGI:2681843]	0.17338
Ptprt	protein tyrosine phosphatase, receptor type, T [Source:MGI Symbol;Acc:MGI:1321152]	0.172469
CR536618.1	No description	0.171424
Pde4d	phosphodiesterase 4D, cAMP specific [Source:MGI Symbol;Acc:MGI:99555]	0.17098
Lgi2	leucine-rich repeat LGI family, member 2 [Source:MGI Symbol;Acc:MGI:2180196]	0.167627
Chd5	chromodomain helicase DNA binding protein 5 [Source:MGI Symbol;Acc:MGI:3036258]	0.164432
Ednra	RIKEN cDNA 4933431K23 gene [Source:MGI Symbol;Acc:MGI:1921725]	0.16042
Gm11665	myosin, light polypeptide 4 [Source:MGI Symbol;Acc:MGI:97267]	0.157815
Gpld1	glycosylphosphatidylinositol specific phospholipase D1 [Source:MGI Symbol;Acc:MGI:106604]	0.157606
Wfdc1	WAP four-disulfide core domain 1 [Source:MGI Symbol;Acc:MGI:1915116]	0.156899
Fibcd1	fibrinogen C domain containing 1 [Source:MGI Symbol;Acc:MGI:2138953]	0.153771
Slc18a2	solute carrier family 18 (vesicular monoamine), member 2 [Source:MGI Symbol;Acc:MGI:106677]	0.148766
Prkcb	protein kinase C, beta [Source:MGI Symbol;Acc:MGI:97596]	0.147799
Ctsc	cathepsin C [Source:MGI Symbol;Acc:MGI:109553]	0.146493
Chst3	carbohydrate (chondroitin 6/keratan) sulfotransferase 3 [Source:MGI Symbol;Acc:MGI:1858224]	0.144503
Kcne4	potassium voltage-gated channel, Isk-related subfamily, gene 4 [Source:MGI Symbol;Acc:MGI:1891125]	0.144308
Gbx1	gastrulation brain homeobox 1 [Source:MGI Symbol;Acc:MGI:95667]	0.135856
Itga2	integrin alpha 2 [Source:MGI Symbol;Acc:MGI:96600]	0.130649
Rxfp2	relaxin/insulin-like family peptide receptor 2 [Source:MGI Symbol;Acc:MGI:2153463]	0.126654
E030011O05Rik	zinc finger and BTB domain containing 38 [Source:MGI Symbol;Acc:MGI:2442866]	0.123742
Gm11665	myosin, light polypeptide 4 [Source:MGI Symbol;Acc:MGI:97267]	0.122635
Slc6a9	solute carrier family 6 (neurotransmitter transporter, glycine), member 9 [Source:MGI Symbol;Acc:MGI:95760]	0.118029
Jam2	junction adhesion molecule 2 [Source:MGI Symbol;Acc:MGI:1933820]	0.116905
Vmn1r90	vomeronasal 1 receptor 90 [Source:MGI Symbol;Acc:MGI:3612342]	0.116385
Lrfn2	leucine rich repeat and fibronectin type III domain containing 2 [Source:MGI Symbol;Acc:MGI:1917780]	0.113588
Usp29	ubiquitin specific peptidase 29 [Source:MGI Symbol;Acc:MGI:1888998]	0.111624
Soat2	sterol O-acyltransferase 2 [Source:MGI Symbol;Acc:MGI:1332226]	0.106598
Bglap-rs1	bone gamma-carboxyglutamate protein, related sequence 1 [Source:MGI Symbol;Acc:MGI:88155]	0.10471
Gm514	predicted gene 514 [Source:MGI Symbol;Acc:MGI:2685360]	0.104447
AC149868.1	uncharacterized protein LOC210541 precursor [Source:RefSeq peptide;Acc:NP_001182184]	0.0954423
Ptgs2	prostaglandin-endoperoxide synthase 2 [Source:MGI Symbol;Acc:MGI:97798]	0.0917447
Mid1	midline 1 [Source:MGI Symbol;Acc:MGI:1100537]	0.0850953
Gm10451	predicted gene 10451 [Source:MGI Symbol;Acc:MGI:3641898]	0.0789707
Fggy	FGGY carbohydrate kinase domain containing [Source:MGI Symbol;Acc:MGI:1922828]	0.0761837
Serpinf1	serine (or cysteine) peptidase inhibitor, clade F, member 1 [Source:MGI Symbol;Acc:MGI:108080]	0.0736427
Aldh1l2	aldehyde dehydrogenase 1 family, member L2 [Source:MGI Symbol;Acc:MGI:2444680]	0.0686216
St6galnac5	phosphatidylinositol glycan anchor biosynthesis, class K [Source:MGI Symbol;Acc:MGI:1913863]	0.0674869
Gm15286	predicted gene 15286 [Source:MGI Symbol;Acc:MGI:3705204]	0.0607759
Cdk15	cyclin-dependent kinase 15 [Source:MGI Symbol;Acc:MGI:3583944]	0.057952
Stc1	stanniocalcin 1 [Source:MGI Symbol;Acc:MGI:109131]	0.0566886
Ncald	neurocalcin delta [Source:MGI Symbol;Acc:MGI:1196326]	0.0565596
Avil	advillin [Source:MGI Symbol;Acc:MGI:1333798]	0.0563342
I830077J02Rik	RIKEN cDNA I830077J02 gene [Source:MGI Symbol;Acc:MGI:3588284]	0.0553266
Chic1	cysteine-rich hydrophobic domain 1 [Source:MGI Symbol;Acc:MGI:1344694]	0.045928
B4galnt2	beta-1,4-N-acetyl-galactosaminyl transferase 2 [Source:MGI Symbol;Acc:MGI:1342058]	0.0384032
Slc45a1	solute carrier family 45, member 1 [Source:MGI Symbol;Acc:MGI:2653235]	0.0378959
Ube1y1	ubiquitin-activating enzyme E1, Chr Y 1 [Source:MGI Symbol;Acc:MGI:98891]	0.0347019
Tceal8	transcription elongation factor A (SII)-like 8 [Source:MGI Symbol;Acc:MGI:1913934]	0.0337025
Cyp26a1	cytochrome P450, family 26, subfamily a, polypeptide 1 [Source:MGI Symbol;Acc:MGI:1096359]	0.0295795
Fut1	fucosyltransferase 1 [Source:MGI Symbol;Acc:MGI:109375]	0.0129323

## Sheet: DESeq2_and_intDiff<0.05_3D
57 genes dysregulated in Bap1 overexpressing mTSCs during differentiation (3D), called by both DESeq2 and intensity difference p<0.05
Probe	Description	Fold change
Prom2	prominin 2 [Source:MGI Symbol;Acc:MGI:2138997]	98.9445
B3gnt3	UDP-GlcNAc:betaGal beta-1,3-N-acetylglucosaminyltransferase 3 [Source:MGI Symbol;Acc:MGI:2152535]	41.9754
3632451O06Rik	RIKEN cDNA 3632451O06 gene [Source:MGI Symbol;Acc:MGI:1914669]	27.6596
Oas1g	2'-5' oligoadenylate synthetase 1G [Source:MGI Symbol;Acc:MGI:97429]	23.9102
Col22a1	collagen, type XXII, alpha 1 [Source:MGI Symbol;Acc:MGI:1916950]	15.8721
Gm9	predicted gene 9 [Source:MGI Symbol;Acc:MGI:2684855]	14.4236
Isg15	ISG15 ubiquitin-like modifier [Source:MGI Symbol;Acc:MGI:1855694]	12.907
Slc39a4	solute carrier family 39 (zinc transporter), member 4 [Source:MGI Symbol;Acc:MGI:1919277]	11.883
Parp14	poly (ADP-ribose) polymerase family, member 14 [Source:MGI Symbol;Acc:MGI:1919489]	10.9239
Mlkl	mixed lineage kinase domain-like [Source:MGI Symbol;Acc:MGI:1921818]	10.0435
Usp18	ubiquitin specific peptidase 18 [Source:MGI Symbol;Acc:MGI:1344364]	9.1133
H2-K1	histocompatibility 2, K1, K region [Source:MGI Symbol;Acc:MGI:95904]	8.10637
Itgb4	integrin beta 4 [Source:MGI Symbol;Acc:MGI:96613]	6.70801
Tap1	proteasome (prosome, macropain) subunit, beta type 9 (large multifunctional peptidase 2) [Source:MGI Symbol;Acc:MGI:1346526]	6.64201
Ddx58	DEAD (Asp-Glu-Ala-Asp) box polypeptide 58 [Source:MGI Symbol;Acc:MGI:2442858]	5.75571
Ap1m2	adaptor protein complex AP-1, mu 2 subunit [Source:MGI Symbol;Acc:MGI:1336974]	5.66053
Rab3il1	RAB3A interacting protein (rabin3)-like 1 [Source:MGI Symbol;Acc:MGI:1922010]	5.38715
Srxn1	sulfiredoxin 1 homolog (S. cerevisiae) [Source:MGI Symbol;Acc:MGI:104971]	5.24591
D630045J12Rik	ATPase, H+ transporting, lysosomal V0 subunit A4 [Source:MGI Symbol;Acc:MGI:2153480]	4.7396
Rnf213	ring finger protein 213 [Source:MGI Symbol;Acc:MGI:1289196]	4.66498
Lgals3bp	lectin, galactoside-binding, soluble, 3 binding protein [Source:MGI Symbol;Acc:MGI:99554]	4.47736
Plxna1	plexin A1 [Source:MGI Symbol;Acc:MGI:107685]	4.41098
Lpl	lipoprotein lipase [Source:MGI Symbol;Acc:MGI:96820]	4.06405
Gabarapl1	gamma-aminobutyric acid (GABA) A receptor-associated protein-like 1 [Source:MGI Symbol;Acc:MGI:1914980]	3.94049
Ttyh2	tweety homolog 2 (Drosophila) [Source:MGI Symbol;Acc:MGI:2157091]	3.84759
Sgk2	serum/glucocorticoid regulated kinase 2 [Source:MGI Symbol;Acc:MGI:1351318]	3.773
Ccne1	cyclin E1 [Source:MGI Symbol;Acc:MGI:88316]	3.2367
Sfn	stratifin [Source:MGI Symbol;Acc:MGI:1891831]	3.13178
Prex1	No description	2.81855
Peg3	paternally expressed 3 [Source:MGI Symbol;Acc:MGI:104748]	0.363643
Slc7a1	solute carrier family 7 (cationic amino acid transporter, y+ system), member 1 [Source:MGI Symbol;Acc:MGI:88117]	0.363564
Nars	asparaginyl-tRNA synthetase [Source:MGI Symbol;Acc:MGI:1917473]	0.360322
Uty	ubiquitously transcribed tetratricopeptide repeat gene, Y chromosome [Source:MGI Symbol;Acc:MGI:894810]	0.342589
Txnip	predicted gene 15441 [Source:MGI Symbol;Acc:MGI:3641753]	0.314707
Aldh18a1	aldehyde dehydrogenase 18 family, member A1 [Source:MGI Symbol;Acc:MGI:1888908]	0.311015
Psat1	phosphoserine aminotransferase 1 [Source:MGI Symbol;Acc:MGI:2183441]	0.288173
Herpud1	predicted gene 15890 [Source:MGI Symbol;Acc:MGI:3802160]	0.280515
Cyp17a1	cytochrome P450, family 17, subfamily a, polypeptide 1 [Source:MGI Symbol;Acc:MGI:88586]	0.264281
Pck2	phosphoenolpyruvate carboxykinase 2 (mitochondrial) [Source:MGI Symbol;Acc:MGI:1860456]	0.258857
As3mt	arsenic (+3 oxidation state) methyltransferase [Source:MGI Symbol;Acc:MGI:1929882]	0.239524
H19	H19 fetal liver mRNA [Source:MGI Symbol;Acc:MGI:95891]	0.237286
Slc1a4	solute carrier family 1 (glutamate/neutral amino acid transporter), member 4 [Source:MGI Symbol;Acc:MGI:2135601]	0.230049
Lrrc8d	leucine rich repeat containing 8D [Source:MGI Symbol;Acc:MGI:1922368]	0.227247
Atf5	activating transcription factor 5 [Source:MGI Symbol;Acc:MGI:2141857]	0.22646
Exd1	exonuclease 3'-5' domain containing 1 [Source:MGI Symbol;Acc:MGI:3045306]	0.206021
Diras2	DIRAS family, GTP-binding RAS-like 2 [Source:MGI Symbol;Acc:MGI:1915453]	0.19335
Pycr1	pyrroline-5-carboxylate reductase 1 [Source:MGI Symbol;Acc:MGI:2384795]	0.188729
Trib3	tribbles homolog 3 (Drosophila) [Source:MGI Symbol;Acc:MGI:1345675]	0.185211
Slc18a2	solute carrier family 18 (vesicular monoamine), member 2 [Source:MGI Symbol;Acc:MGI:106677]	0.148766
Ctsc	cathepsin C [Source:MGI Symbol;Acc:MGI:109553]	0.146493
Slc6a9	solute carrier family 6 (neurotransmitter transporter, glycine), member 9 [Source:MGI Symbol;Acc:MGI:95760]	0.118029
Bglap-rs1	bone gamma-carboxyglutamate protein, related sequence 1 [Source:MGI Symbol;Acc:MGI:88155]	0.10471
Fggy	FGGY carbohydrate kinase domain containing [Source:MGI Symbol;Acc:MGI:1922828]	0.0761837
Avil	advillin [Source:MGI Symbol;Acc:MGI:1333798]	0.0563342
Chic1	cysteine-rich hydrophobic domain 1 [Source:MGI Symbol;Acc:MGI:1344694]	0.045928
B4galnt2	beta-1,4-N-acetyl-galactosaminyl transferase 2 [Source:MGI Symbol;Acc:MGI:1342058]	0.0384032
Tceal8	transcription elongation factor A (SII)-like 8 [Source:MGI Symbol;Acc:MGI:1913934]	0.0337025
