# Supplementary material for: BAP1/ASXL complex modulation regulates epithelial-mesenchymal transition during trophoblast differentiation and invasion
Source: eLife. 2021 Jun 25;10:e63254. doi: 10.7554/eLife.63254 (PMC8233037; doi:10.7554/eLife.63254)
Supplement: Supplementary file 4. [file elife-63254-supp4.xlsx]

## Sheet: SAM_DAVID_0D
Category	Term	Count	%	PValue	Genes	List Total	Pop Hits	Pop Total	Fold Enrichment	Bonferroni	Benjamini	FDR
UP_KEYWORDS	Glycoprotein	331	0.201885	3.58165e-36	ADCY1, ATP1B1, LYPD3, CADM4, CADM1, GBGT1, PGF, OSMR, CRHBP, L1CAM, NOTUM, GGT1, ADORA1, AQP3, HMCN2, CDH22, C1RA, APP, S1PR1, CREB3L1, VNN1, CHRNA4, CREB3L3, HTR1D, CDH23, ADAMTS20, OLFML2B, EFNB1, EFNB2, LIFR, PTPRS, BSN, PTPRU, CD40, SIRPA, TMEM150A, CD38, CD37, KRT18, ADAMTS8, LPAR5, TACSTD2, LPAR6, ABCB1B, TANC2, ASPHD2, BACE1, ST14, ROR1, PDGFRA, PDGFRB, EFNA5, ADAMTS1, STC1, ITGA2B, SLC2A1…	1157	1918	12826	1.9131	1.31805e-33	1.31805e-33	4.93505e-33
UP_SEQ_FEATURE	glycosylation site:N-linked (GlcNAc...)	295	0.179927	6.03078e-32	ATP1B1, ADCY1, LYPD3, CADM4, CADM1, GBGT1, PGF, OSMR, CRHBP, L1CAM, NOTUM, GGT1, ADORA1, CDH22, C1RA, APP, S1PR1, CREB3L1, VNN1, CHRNA4, CREB3L3, HTR1D, CDH23, ADAMTS20, OLFML2B, EFNB1, EFNB2, LIFR, PTPRS, PTPRU, CD40, SIRPA, TMEM150A, CD38, CD37, ADAMTS8, LPAR5, TACSTD2, LPAR6, ABCB1B, ASPHD2, BACE1, ST14, ROR1, PDGFRA, PDGFRB, EFNA5, ADAMTS1, STC1, ITGA2B, ENPP5, SLC2A12, IL1R2, ACP5, SERPINH1,…	1032	1737	11563	1.90289	1.53001e-28	1.53001e-28	1.06567e-28
UP_KEYWORDS	Disulfide bond	239	0.145772	6.10349e-29	ATP1B1, CADM4, CADM1, PGF, OSMR, CRHBP, SYT9, L1CAM, GGT1, DNASE1L3, ADORA1, HMCN2, C1RA, APP, S1PR1, ISG15, CHRNA4, HTR1D, ADAMTS20, OLFML2B, EFNB1, EFNB2, LIFR, PTPRS, CD40, PTPRU, PIK3IP1, SIRPA, CD38, ADAMTS9, ADAMTS8, LPAR5, TACSTD2, LPAR6, BACE1, ST14, KRT14, PDGFRA, ROR1, PDGFRB, EFNA5, ADAMTS1, STC1, WFDC2, ITGA2B, IL1R2, RBP4, XK, ACP5, SEMA5A, ALCAM, SEMA5B, OLFM2, LGALS3, CELSR3, EMILI…	1157	1306	12826	2.02868	2.24608e-26	1.12304e-26	8.40983e-26
UP_SEQ_FEATURE	topological domain:Extracellular	202	0.123205	9.40133e-29	ATP1B1, CADM4, AQP9, CADM1, OSMR, SYT8, GGT1, L1CAM, ADORA1, AQP3, TMEM140, CDH22, APP, S1PR1, CHRNA4, HTR1D, CDH23, EFNB1, EFNB2, LIFR, PTPRS, CD40, PTPRU, PIK3IP1, SIRPA, TMEM150A, CD38, CD37, LPAR5, LPAR6, TACSTD2, ST14, BACE1, PDGFRA, ROR1, PDGFRB, ITGA2B, SLC2A12, IL1R2, XK, TMEM229B, SEMA5A, ALCAM, SEMA5B, EPHB6, AI464131, GUCY2G, GPR157, CELSR3, EPHA1, ABCG1, GPR153, KDR, EPHA4, SEMA6A, SE…	1032	1037	11563	2.18255	2.38512e-25	1.19256e-25	1.66126e-25
UP_KEYWORDS	Signal	290	0.176878	2.56318e-25	LYPD3, CADM4, CADM1, PGF, OSMR, CRHBP, L1CAM, NOTUM, DNASE1L3, HMCN2, CDH22, C1RA, APP, VNN1, CHRNA4, HTRA3, CDH23, MAGI2, ADAMTS20, OLFML2B, EFNB1, EFNB2, LIFR, PTPRS, PTPRU, CD40, PIK3IP1, SIRPA, TMEM150A, ADAMTS9, ADAMTS8, TACSTD2, BACE1, ROR1, PDGFRA, PDGFRB, EFNA5, ADAMTS1, STC1, WFDC2, ITGA2B, ENPP5, RBP4, IL1R2, ACP5, NRN1, SERPINH1, SEMA5A, ALCAM, SEMA5B, EPHB6, OLFM2, GUCY2G, GPR155, LGA…	1157	1814	12826	1.77222	9.43249e-23	3.14416e-23	3.53173e-22
UP_SEQ_FEATURE	signal peptide	241	0.146992	5.63231e-26	CADM4, LYPD3, CADM1, PGF, OSMR, CRHBP, L1CAM, NOTUM, DNASE1L3, CDH22, C1RA, APP, VNN1, CHRNA4, HTRA3, CDH23, ADAMTS20, OLFML2B, EFNB1, EFNB2, LIFR, PTPRS, CD40, PTPRU, PIK3IP1, SIRPA, TMEM150A, ADAMTS8, TACSTD2, BACE1, PDGFRA, ROR1, PDGFRB, ADAMTS1, EFNA5, STC1, WFDC2, ITGA2B, ENPP5, IL1R2, RBP4, ACP5, NRN1, SERPINH1, SEMA5A, ALCAM, SEMA5B, EPHB6, OLFM2, GUCY2G, CELSR3, SERPINI1, ECM1, EMILIN3, E…	1032	1407	11563	1.91917	1.42892e-22	4.76306e-23	9.95258e-23
GOTERM_CC_DIRECT	GO:0005887~integral component of plasma membrane	114	0.0695313	7.04518e-22	ADCY1, CADM4, AQP9, CADM1, GABRB3, OSMR, PLXNA2, SLC6A2, GRIK3, SLC7A8, GGT1, IL17RE, TLR5, SLC7A4, IL17RC, SLC7A5, AQP3, IL17RA, TAPBP, SLC7A7, SLC2A6, SLC2A5, SLC2A4, SLC2A3, KCNK6, HTR1D, SLCO4A1, SLC22A21, PROKR1, CNGA3, SIRPA, TMEM150A, CD37, THBD, TACSTD2, LPAR6, ST14, BACE1, ROR1, PDGFRA, GPR50, ENPP5, SLC2A12, SLC38A4, PLXNC1, ABCA1, ALCAM, EPHB6, ADRA2B, PLXND1, MRC1, HCN2, SLC6A12, EPHA…	1073	489	11880	2.58115	3.586e-19	3.586e-19	1.01708e-18
UP_SEQ_FEATURE	disulfide bond	183	0.111616	1.98778e-22	ATP1B1, CADM4, GABRB3, CADM1, PGF, OSMR, CRHBP, TGFB3, L1CAM, DLK2, JAG1, ILDR1, ADORA1, DNASE1L3, TAPBP, C1RA, APP, ST3GAL5, IL15RA, CHRNA4, HTR1D, SCUBE3, ADAMTS20, SCUBE1, OLFML2B, EFNB1, MFI2, EFNB2, LIFR, PRL8A9, PTPRS, PROKR1, CD40, PTPRU, PIK3IP1, SIRPA, SLC34A2, CD38, THBD, ADAMTS8, LPAR5, TACSTD2, CD59A, LPAR6, ST14, BACE1, PDGFRA, ROR1, PDGFRB, GPR50, STC1, CALR3, ADAMTS1, EFNA5, WFDC2,…	1032	1004	11563	2.04225	5.04301e-19	1.26075e-19	3.51251e-19
UP_KEYWORDS	Cell membrane	239	0.145772	5.67325e-21	ATP1B1, ADCY1, LYPD3, CADM1, SYT8, L1CAM, GGT1, ADORA1, CDH22, DIRAS1, S1PR1, GAB2, VNN1, CHRNA4, HTR1D, CDH23, MAGI2, LIFR, CD40, PTPRU, WNK2, PIK3IP1, TMEM150A, LPAR5, LPAR6, ABCB1B, PDGFRA, PDGFRB, TMEM184A, EFNA5, ADD2, IL1R2, RALGPS1, GNAI1, NRN1, ALCAM, EPHB6, MACF1, RAC3, DMD, GPR157, CELSR3, EPHA1, KDR, GPR153, SEMA6A, EPHA4, SEMA6C, SEMA6D, EPHA8, SYTL1, CD200, PDZK1, SLC16A13, GPR162, A…	1157	1483	12826	1.78655	2.08776e-18	5.21939e-19	7.81702e-18
UP_SEQ_FEATURE	topological domain:Cytoplasmic	242	0.147601	8.32847e-22	ATP1B1, ADCY1, CADM4, AQP9, CADM1, GBGT1, OSMR, SYT8, SYT9, L1CAM, GGT1, ADORA1, AQP3, TMEM140, CDH22, APP, S1PR1, CHRNA4, CREB3L1, CREB3L3, HTR1D, CDH23, EFNB1, EFNB2, LIFR, PTPRS, CD40, PTPRU, PIK3IP1, SIRPA, TMEM150A, CD38, CD37, LPAR5, TACSTD2, LPAR6, ABCB1B, ASPHD2, BACE1, ST14, PEX26, PDGFRA, ROR1, PDGFRB, ITGA2B, SLC2A12, IL1R2, XK, TMEM229B, SEMA5A, ALCAM, SEMA5B, EPHB6, AI464131, GUCY2G,…	1032	1513	11563	1.79212	2.11293e-18	4.22587e-19	1.47168e-18
GOTERM_CC_DIRECT	GO:0005886~plasma membrane	327	0.199445	2.72927e-20	ADCY1, ATP1B1, LYPD3, CADM1, SYT8, SYT9, L1CAM, GGT1, ADORA1, AQP3, ACTG1, CDH22, DIRAS1, APP, S1PR1, GAB2, VNN1, CHRNA4, HTR1D, CDH23, MAGI2, CRYAB, NCF1, EFNB1, EFNB2, LIFR, ZHX2, WNK2, PTPRU, CD40, PIK3IP1, SIRPA, TMEM150A, CD38, KRT19, LPAR5, TACSTD2, LPAR6, ABCB1B, BACE1, RYR1, PDGFRA, TMEM184A, RYR2, PDGFRB, SURF2, EFNA5, ADD2, ENPP5, IL1R2, RALGPS1, GNAI1, OAS3, NRN1, ALCAM, EPHB6, MACF1, …	1073	2300	11880	1.57412	1.3892e-17	6.94598e-18	3.94011e-17
GOTERM_CC_DIRECT	GO:0009986~cell surface	93	0.0567229	5.3893e-19	ACVRL1, OCLN, SLC6A2, CLSTN3, TRPV2, TGFB3, H2-D1, L1CAM, CXCR2, PDIA4, SDC4, IL17RC, CXADR, SDC3, SLC1A4, APP, KISS1R, SLC2A4, ANK3, TRPV4, TGFA, TMEM102, KCNQ2, NT5E, CEACAM1, H2-K1, VASN, ICAM1, SCUBE3, CRYAB, SCUBE1, MFI2, SLC3A2, BSN, NFAM1, CD40, CD38, ADAMTS9, THBD, VAMP8, BACE1, ROR1, CNTN2, PDGFRA, PDGFRB, ITGA2B, CPM, RTN4RL1, ADCYAP1R1, ADAMTS15, ITGB4, KIT, ABCA1, CDH5, TNFRSF1A, EPHB…	1073	385	11880	2.67448	2.74315e-16	9.14385e-17	7.78028e-16
GOTERM_CC_DIRECT	GO:0016021~integral component of membrane	386	0.23543	1.31764e-14	GBGT1, OSMR, L1CAM, TMEM140, CDH22, APP, KCNK6, VNN1, HTR1D, CDH23, LIFR, BSN, PTPRS, PTPRU, PIK3IP1, SIRPA, TMEM136, TMEM139, BACE1, ST14, ROR1, RYR1, RYR2, SURF1, IL1R2, ALCAM, GUCY2G, MGAT4A, ACER2, CLGN, CD200, D630045J12RIK, KCNAB3, SLC20A2, TRPV2, ATP10A, H2-D1, RTN1, MMP24, SLC23A1, KISS1R, P4HA2, IL1RAP, TMEM102, TRPV4, CEACAM1, SLC22A7, SLC3A2, SLC3A1, MMP14, KLRG2, TLCD2, PLXDC2, SRGAP3…	1073	3071	11880	1.39163	6.72473e-12	1.68121e-12	1.90736e-11
UP_KEYWORDS	Transmembrane helix	382	0.232991	3.57239e-14	ADCY1, ATP1B1, CADM4, CADM1, AQP9, OSMR, GBGT1, SYT8, SYT9, L1CAM, GGT1, ADORA1, AQP3, TMEM140, CDH22, APP, S1PR1, KCNK6, CREB3L1, CHRNA4, CREB3L3, HTR1D, CDH23, EFNB1, EFNB2, APOLD1, LIFR, PTPRS, PTPRU, CD40, PIK3IP1, SIRPA, TMEM150A, CD38, CD37, TMEM136, LPAR5, TACSTD2, LPAR6, ABCB1B, TMEM139, ASPHD2, PEX26, BACE1, ST14, ROR1, RYR1, PDGFRA, TMEM184A, RYR2, PDGFRB, SURF1, ITGA2B, SLC2A12, ENPP5,…	1157	3038	12826	1.39391	1.31557e-11	2.63112e-12	4.92606e-11
UP_KEYWORDS	Transmembrane	382	0.232991	5.87939e-14	ADCY1, ATP1B1, CADM4, CADM1, AQP9, OSMR, GBGT1, SYT8, SYT9, L1CAM, GGT1, ADORA1, AQP3, TMEM140, CDH22, APP, S1PR1, KCNK6, CREB3L1, CHRNA4, CREB3L3, HTR1D, CDH23, EFNB1, EFNB2, APOLD1, LIFR, PTPRS, PTPRU, CD40, PIK3IP1, SIRPA, TMEM150A, CD38, CD37, TMEM136, LPAR5, TACSTD2, LPAR6, ABCB1B, TMEM139, ASPHD2, PEX26, BACE1, ST14, ROR1, RYR1, PDGFRA, TMEM184A, RYR2, PDGFRB, SURF1, ITGA2B, SLC2A12, ENPP5,…	1157	3047	12826	1.38979	2.16538e-11	3.609e-12	8.10796e-11
UP_KEYWORDS	Receptor	100	0.0609923	1.01679e-12	GABRB3, OSMR, GRIK3, IL17RE, TLR5, ILDR1, IL17RC, ADORA1, IL17RA, S1PR1, GAB2, CHRNA4, IL15RA, HTR1D, LIFR, PTPRS, PROKR1, PTPRU, CD40, AHR, THBD, LPAR5, LPAR6, ROR1, RYR1, PDGFRA, GPR50, RYR2, PDGFRB, ITGA2B, IL1R2, PLXNC1, ADCYAP1R1, ITGB4, PAQR5, VDR, EPHB6, ADRA2B, PLXND1, CSF1R, GUCY2G, MRC1, GPR155, AIPL1, GPR157, MET, ITGA1, CELSR3, NR4A3, EPHA1, GPR153, KDR, EPHA4, TNFSF11, EPHA8, SLC7A1,…	1157	530	12826	2.09162	3.74161e-10	5.34516e-11	1.40095e-09
UP_KEYWORDS	Membrane	509	0.310451	5.56778e-12	OSMR, GBGT1, L1CAM, TMEM140, CDH22, DIRAS1, APP, KCNK6, VNN1, HTR1D, CDH23, MAGI2, GATM, NCF1, LIFR, PTPRS, PTPRU, PIK3IP1, SIRPA, TMEM136, UNC13D, TMEM139, BACE1, ST14, ROR1, RYR1, RYR2, SURF1, IL1R2, RALGPS1, GNAI1, ALCAM, RAC3, CDC42EP3, GUCY2G, MGAT4A, ACER2, GAS2, CLGN, TNK1, MARCKS, CD200, SYTL1, D630045J12RIK, GNAZ, SLC20A2, TRPV2, ATP10A, H2-D1, RTN1, MMP24, SLC23A1, KISS1R, P4HA2, IL1RAP…	1157	4450	12826	1.26799	2.04894e-09	2.56117e-10	7.67167e-09
INTERPRO	IPR013783:Immunoglobulin-like fold	73	0.0445244	1.49188e-12	CADM4, CADM1, OSMR, PLXNA2, PSG19, LEPR, H2-D1, L1CAM, ILDR1, CXADR, TAPBP, TRIM46, HMCN2, CILP2, SEMA3G, IL1RAP, CEACAM1, H2-K1, VASN, ICAM1, IL18RAP, LIFR, PTPRS, PTPRU, SIRPA, AMIGO3, ROR1, CNTN2, PDGFRA, PDGFRB, STBD1, IL1R2, PLXNC1, TNC, ITGB4, KIT, TARM1, ALCAM, LINGO1, IGSF11, EPHB6, COL6A3, TGM1, ACAN, TGM2, MFAP3L, NFATC2, PLXND1, CSF1R, LRFN2, FN1, OBSCN, IL2RB, MET, NFASC, AXL, MXRA8, …	1105	330	12069	2.41612	2.35574e-09	2.35574e-09	2.49426e-09
UP_SEQ_FEATURE	transmembrane region	318	0.193956	3.06168e-12	ADCY1, ATP1B1, CADM4, CADM1, AQP9, GBGT1, OSMR, SYT8, SYT9, L1CAM, GGT1, ADORA1, AQP3, TMEM140, CDH22, APP, S1PR1, CREB3L1, CHRNA4, CREB3L3, HTR1D, CDH23, EFNB1, EFNB2, LIFR, PTPRS, PTPRU, CD40, PIK3IP1, SIRPA, TMEM150A, CD38, CD37, TMEM136, LPAR5, TACSTD2, LPAR6, ABCB1B, ASPHD2, PEX26, BACE1, ST14, ROR1, PDGFRA, TMEM184A, PDGFRB, SURF1, ITGA2B, SLC2A12, ENPP5, IL1R2, XK, TMEM229B, SFXN5, SEMA5A,…	1032	2536	11563	1.40498	7.76744e-09	1.29457e-09	5.41012e-09
GOTERM_CC_DIRECT	GO:0005615~extracellular space	109	0.0664817	4.69593e-11	LYPD3, PGF, CRHBP, TGFB3, GGT1, ACTG1, APP, DMXL2, STAG3, VNN1, IL15RA, MTUS1, ADAMTS20, SCUBE1, MFI2, CD40, ADAMTS9, THBD, CPE, TACSTD2, ST14, STC1, XDH, RBP4, PODN, OAS3, NRN1, SERPINH1, GREM2, ABCA3, TIMP3, TPI1, SRGN, FN1, LGALS3, MET, SERPINI1, ECM1, KITL, MUC4, TNFSF11, SFRP1, MERTK, BMP6, INSL3, LEPR, IGFBP6, SCT, MTHFD2, SEMA3G, DLG3, TGFA, NOS2, ANGPT2, CEACAM1, VASN, ICAM1, SAA3, COL25A…	1073	637	11880	1.89454	2.39023e-08	4.78046e-09	6.7793e-08
GOTERM_CC_DIRECT	GO:0009897~external side of plasma membrane	36	0.0219572	5.10105e-09	RTN4RL1, OSMR, TFR2, H2-D1, L1CAM, ABCA1, KIT, CDH5, ALCAM, LY6A, S1PR1, SLC2A4, CHRNA4, THBS1, SCNN1A, CEACAM1, GUCY2G, H2-K1, LY6C1, ICAM1, IL2RB, LGALS3, SCUBE1, ITGA1, CD40, DNAIC2, ABCG1, KDR, TNFRSF9, TFRC, CD59A, PDGFRA, AMOT, EPOR, ANTXR1, ITGA2B	1073	134	11880	2.9745	2.59643e-06	4.32739e-07	7.36414e-06
UP_KEYWORDS	Secreted	101	0.0616023	9.312e-09	PGF, CRHBP, TGFB3, NOTUM, IL17RE, DNASE1L3, HMCN2, ISG15, IL15RA, HTRA3, SCUBE3, ADAMTS20, SCUBE1, OLFML2B, COL22A1, LIFR, PRL8A9, CD40, ADAMTS8, CPE, ADAMTS1, STC1, WFDC2, ENPP5, XDH, RBP4, IL1R2, PODN, GREM2, TIMP3, EPHB6, ENTPD5, OLFM2, SRGN, FN1, MGAT4A, LGALS3, ADAM23, SERPINI1, ECM1, KITL, EMILIN3, KDR, MUC4, CXCL17, TNFSF11, SFRP1, THSD4, BMP6, INSL3, LEPR, IGFBP6, SDC4, CXADR, MMP24, SCT,…	1157	629	12826	1.78004	3.42681e-06	3.80757e-07	1.28307e-05
UP_KEYWORDS	Neurogenesis	43	0.0262267	2.77856e-08	DPF3, CPLX2, L1CAM, ZEB1, PAX3, TTLL7, SLC7A5, ZIC3, SEMA5A, SEMA5B, ATCAY, DAB1, ATOH8, CHD5, DCLK1, NGEF, MAGI2, BEND6, CHAC1, EFNB1, SOX11, EFNB2, PHF10, FZD3, SHANK1, IGSF9B, RUFY3, ASCL2, PRKD1, SEMA6A, EPHA4, DACT1, SEMA6C, SEMA6D, EPHA8, SEMA4F, ITGA8, CHN1, OPHN1, EFNA5, SMARCA2, DYNLT1B, UNCX	1157	189	12826	2.52211	1.0225e-05	1.02251e-06	3.8285e-05
GOTERM_CC_DIRECT	GO:0005576~extracellular region	106	0.0646519	3.78143e-08	PGF, CRHBP, TGFB3, NOTUM, IL17RE, HMCN2, C1RA, ISG15, IL15RA, HTRA3, SCUBE3, ADAMTS20, SCUBE1, OLFML2B, MFI2, LIFR, APOLD1, PRL8A9, CD40, ADAMTS8, CPE, CD59A, ST14, ADAMTS1, STC1, WFDC2, ENPP5, XDH, RBP4, IL1R2, PODN, GREM2, TIMP3, EPHB6, ENTPD5, OLFM2, SRGN, FN1, MGAT4A, LGALS3, ADAM23, SERPINI1, ECM1, KITL, EMILIN3, KDR, MUC4, CXCL17, TNFSF11, SFRP1, THSD4, BMP6, INSL3, LEPR, IGFBP6, SDC4, CXAD…	1073	689	11880	1.70335	1.92473e-05	2.74963e-06	5.45907e-05
UP_KEYWORDS	Immunoglobulin domain	43	0.0262267	1.12153e-07	IL1R2, CADM4, CADM1, LEPR, L1CAM, ILDR1, KIT, TARM1, CXADR, TAPBP, ALCAM, HMCN2, IGSF11, LINGO1, CILP2, SEMA3G, IL1RAP, ACAN, MFAP3L, CEACAM1, CSF1R, LRFN2, H2-K1, OBSCN, ICAM1, IL18RAP, NFASC, AXL, PTPRS, NFAM1, PTPRU, MXRA8, IGSF9B, SIRPA, KDR, AMIGO3, SEMA4F, PDGFRA, ROR1, CNTN2, PDGFRB, MERTK, CD200	1157	198	12826	2.40747	4.12715e-05	3.75202e-06	0.000154533
UP_KEYWORDS	Developmental protein	99	0.0603824	1.7574e-07	CADM1, PGF, STK36, HOXD13, L1CAM, PDX1, JAG1, SLC7A5, ZIC3, CITED1, TAF7L, CITED2, DAB1, CREB3L1, ATOH8, TWIST2, EFNB1, NKX2-9, EFNB2, VAX2, SIX5, HES6, ASCL2, RYR1, PDGFRA, LCLAT1, RYR2, PDGFRB, EFNA5, PRDM1, UNCX, ADCYAP1R1, HOXA11, HOXB13, BICC1, GREM2, PAQR5, SEMA5A, T, SEMA5B, B3GNT5, NRARP, HOXA7, HOXA10, MBNL3, PLXND1, OBSCN, DIXDC1, EPAS1, CELSR3, KDR, DLX3, EPHA4, CXCL17, SEMA6A, TNFSF11…	1157	649	12826	1.69102	6.46701e-05	5.38934e-06	0.000242147
UP_KEYWORDS	Differentiation	71	0.0433046	4.44525e-07	TEX19.1, ELF3, CADM1, PGF, PAX6, SLFN5, L1CAM, TTLL7, ZEB1, SLC7A5, ZIC3, CITED1, TAF7L, CITED2, GLI1, DAB1, ATOH8, ANGPT2, TWIST2, BATF3, EFNB1, SOX11, EFNB2, PRKCH, PTPRU, HES6, RHBDD1, ASCL2, PRKD1, SEMA4F, IQCG, BRDT, EFNA5, CALR3, GADD45B, UNCX, CPLX2, FHL1, ADCYAP1R1, RIMS2, PAQR5, SEMA5A, RASAL1, SEMA5B, HSPA2, TDRKH, CHD5, DCLK1, OBSCN, NGEF, TESC, LGALS3, EPAS1, AXL, FZD5, SHANK1, RUFY3,…	1157	425	12826	1.85194	0.000163572	1.25834e-05	0.000612497
INTERPRO	IPR007110:Immunoglobulin-like domain	46	0.0280565	1.0562e-07	IL1R2, CADM4, CADM1, PSG19, LEPR, H2-D1, L1CAM, ILDR1, KIT, TARM1, CXADR, TAPBP, ALCAM, HMCN2, LINGO1, IGSF11, CILP2, SEMA3G, IL1RAP, ACAN, MFAP3L, CEACAM1, CSF1R, LRFN2, H2-K1, OBSCN, ICAM1, IL18RAP, NFASC, AXL, PTPRS, PTPRU, MXRA8, IGSF9B, SIRPA, KDR, AMIGO3, PDGFRA, ROR1, CNTN2, PDGFRB, H2-T23, H2-T24, MERTK, H2-DMA, CD200	1105	216	12069	2.32602	0.000166759	8.33831e-05	0.00017658
GOTERM_BP_DIRECT	GO:0007275~multicellular organism development	105	0.064042	9.04158e-08	CADM1, PGF, STK36, HOXD13, L1CAM, PDX1, JAG1, SLC7A5, ZIC3, CITED1, TAF7L, CITED2, DAB1, CREB3L1, ATOH8, TWIST2, EFNB1, NKX2-9, EFNB2, VAX2, SIX5, HES6, ASCL2, RYR1, PDGFRA, LCLAT1, RYR2, PDGFRB, EFNA5, PRDM1, UNCX, ADCYAP1R1, HOXA11, HOXB13, BICC1, GREM2, PAQR5, SEMA5A, SEMA5B, T, VDR, TPI1, B3GNT5, NRARP, HOXA7, HOXA10, MBNL3, PLXND1, OBSCN, DIXDC1, EPAS1, CELSR3, KDR, DLX3, SEMA6A, EPHA4, CXCL…	1008	691	11126	1.67722	0.000323636	0.000323636	0.000166013
INTERPRO	IPR003961:Fibronectin, type III	31	0.0189076	4.36257e-07	OSMR, TNC, LEPR, ITGB4, L1CAM, TRIM46, EPHB6, COL6A3, LRFN2, FN1, VASN, OBSCN, IL2RB, BZRAP1, NFASC, AXL, LIFR, PTPRS, PTPRU, IGSF9B, MID1, EPHA1, MID2, FSD1, EPHA4, PRLR, EPHA8, CNTN2, EPOR, MERTK, IL3RA	1105	123	12069	2.75274	0.000688613	0.00022959	0.000729354
KEGG_PATHWAY	mmu04514:Cell adhesion molecules (CAMs)	22	0.0134183	2.83063e-06	H2-K1, CLDN7, ICAM1, CLDN9, OCLN, CADM1, NFASC, H2-D1, L1CAM, CD40, SDC4, CDH3, CDH4, CDH5, SDC3, ALCAM, ITGA8, CNTN2, H2-T23, H2-T24, CD6, H2-DMA	453	72	4605	3.10614	0.000724381	0.000724381	0.00369092
GOTERM_BP_DIRECT	GO:0007399~nervous system development	52	0.031716	2.18741e-07	DPF3, CPLX2, L1CAM, PAX3, TTLL7, ZEB1, NRN1, SLC7A5, ZIC3, SEMA5A, SEMA5B, ATCAY, APP, DAB1, LHX2, DLG3, ATOH8, CHD5, DCLK1, NGEF, MAGI2, BEND6, CHAC1, EFNB1, SOX11, EFNB2, DPYSL5, PHF10, FZD3, DPYSL3, HES6, SHANK1, IGSF9B, ALK, RUFY3, PRKD1, ASCL2, SEMA6A, NBL1, EPHA4, AMIGO3, SEMA6C, DACT1, SEMA6D, SEMA4F, EPHA8, ITGA8, CHN1, OPHN1, EFNA5, SMARCA2, UNCX	1008	268	11126	2.14164	0.000782785	0.000391469	0.000401631
SMART	SM00060:FN3	26	0.015858	3.05705e-06	OSMR, TNC, LEPR, ITGB4, L1CAM, EPHB6, FN1, VASN, OBSCN, BZRAP1, NFASC, AXL, LIFR, PTPRS, PTPRU, MID1, IGSF9B, EPHA1, MID2, FSD1, EPHA4, PRLR, EPHA8, CNTN2, EPOR, MERTK	677	91	6550	2.7643	0.00094113	0.00094113	0.00410146
INTERPRO	IPR003599:Immunoglobulin subtype	38	0.0231771	9.74088e-07	IL1R2, CADM4, CADM1, PSG19, L1CAM, ILDR1, KIT, TARM1, CXADR, ALCAM, HMCN2, IGSF11, LINGO1, CILP2, IL1RAP, ACAN, MFAP3L, CEACAM1, CSF1R, LRFN2, ICAM1, OBSCN, IL18RAP, NFASC, AXL, PTPRS, MXRA8, PTPRU, IGSF9B, SIRPA, KDR, AMIGO3, PDGFRA, ROR1, CNTN2, PDGFRB, MERTK, CD200	1105	175	12069	2.37167	0.0015369	0.000384448	0.00162852
GOTERM_CC_DIRECT	GO:0005578~proteinaceous extracellular matrix	34	0.0207374	4.21613e-06	PODN, TNC, ADAMTS15, TGFB3, MMP28, TIMP3, MMP24, RELL2, HMCN2, CILP2, HPSE, COL27A1, COL6A3, COL6A2, ACAN, TGM2, COL11A2, COL8A2, FN1, LGALS3, ADAMTS20, OLFML2B, COL22A1, NID2, EMILIN3, ECM1, MMP12, COL5A1, ADAMTS9, ADAMTS8, SFRP1, THSD4, ADAMTS1, WNT7A	1073	159	11880	2.36755	0.00214372	0.000268216	0.00608646
UP_KEYWORDS	Zymogen	23	0.0140282	7.64628e-06	KLK7, KLK8, REN1, ADAMTS20, HEXA, ADAMTS15, CTSR, CTSA, GGT1, MMP14, MMP12, PSMB8, MMP24, PSMB9, PRSS8, NAGPA, CTSJ, ADAMTS8, CPE, CTSO, BACE1, CTSC, ADAMTS1	1157	88	12826	2.89736	0.00280989	0.000200968	0.0105351
SMART	SM00409:IG	38	0.0231771	1.40666e-05	IL1R2, CADM4, CADM1, PSG19, L1CAM, ILDR1, KIT, TARM1, CXADR, ALCAM, HMCN2, IGSF11, LINGO1, CILP2, IL1RAP, ACAN, MFAP3L, CEACAM1, CSF1R, LRFN2, ICAM1, OBSCN, IL18RAP, NFASC, AXL, PTPRS, MXRA8, PTPRU, IGSF9B, SIRPA, KDR, AMIGO3, PDGFRA, ROR1, CNTN2, PDGFRB, MERTK, CD200	677	175	6550	2.10087	0.00432317	0.00216393	0.018871
KEGG_PATHWAY	mmu04360:Axon guidance	26	0.015858	2.13847e-05	PLXNC1, GNAI1, PLXNA2, ABLIM3, L1CAM, SEMA5A, SEMA5B, EPHB6, RAC3, SEMA3G, PAK1, NFATC2, NGEF, EFNB1, MET, EFNB2, DPYSL5, EPHA1, SEMA6A, EPHA4, SEMA6C, SEMA6D, EPHA8, SEMA4F, SRGAP3, EFNA5	453	106	4605	2.49344	0.00545959	0.00273353	0.0278809
GOTERM_BP_DIRECT	GO:0030154~cell differentiation	81	0.0494038	1.60589e-06	TEX19.1, ELF1, ELF3, CADM1, PGF, MITF, PAX6, SLFN5, L1CAM, TTLL7, PDX1, ZEB1, SLC7A5, CITED1, ZIC3, TAF7L, CITED2, GLI1, GATA2, DAB1, ATOH8, ANGPT2, TWIST2, BATF3, EFNB1, SOX11, EFNB2, PRKCH, PTPRU, HES6, RHBDD1, ASCL2, PRKD1, SEMA4F, IQCG, BRDT, EFNA5, CALR3, GADD45B, TBX18, UNCX, CPLX2, FHL1, ADCYAP1R1, KIT, RIMS2, NHS, PAQR5, SEMA5A, RASAL1, SEMA5B, HSPA2, TDRKH, CHD5, DCLK1, NGEF, OBSCN, TESC…	1008	523	11126	1.70947	0.00573261	0.00191453	0.00294856
UP_KEYWORDS	Cell adhesion	42	0.0256168	1.65232e-05	ATP1B1, CADM4, CADM1, CLSTN3, TNC, FERMT1, ITGB4, L1CAM, CXADR, CDH3, CDH4, CDH5, MMP24, ALCAM, CDH22, IGSF11, APP, HPSE, COL6A2, THBS1, CD6, COL8A2, FN1, CDH23, ICAM1, OLR1, ADAM23, NFASC, ITGA1, PTPRS, NID2, PTPRU, IGSF9B, KITL, EPHA1, MUC4, EPHA4, AMIGO3, EPHA8, ITGA8, CNTN2, ITGA2B	1157	230	12826	2.02432	0.00606214	0.000405291	0.0227645
UP_KEYWORDS	Calcium	69	0.0420847	1.72196e-05	CLSTN3, TRPV2, SUSD1, SYT9, DLK2, MMP28, JAG1, DNASE1L3, MMP24, CDH22, HMCN2, C1RA, EFHD1, HPSE, SLC25A24, SLC24A3, SNTB1, PLS1, TRPV4, NOS3, COL11A2, ANGPT2, CDH23, SCUBE3, SCUBE1, PADI2, FBP2, MMP14, MMP12, BSPRY, PPEF2, RYR1, RYR2, ADAMTS1, LCP1, ITGA2B, REPS2, CABP7, CDH3, CDH4, CDH5, ANXA8, MACF1, DMD, COL27A1, TGM1, ENTPD5, TGM2, ACAN, THBS1, EHD2, ENTPD2, MRC1, TESC, SLC8A2, ITGA1, ANXA1, …	1157	453	12826	1.68853	0.00631684	0.000395976	0.0237238
UP_KEYWORDS	Intermediate filament	11	0.00670916	2.05462e-05	KRT19, KRT18, KRT7, KRT14, VIM, SYNC, KRT8, NEFH, KRT20, NEFL, NEFM	1157	24	12826	5.08088	0.00753257	0.000444671	0.0283063
UP_KEYWORDS	Homeobox	28	0.0170779	2.24481e-05	EVX1, HOXA11, PAX6, HOXD13, HOXB13, PAX3, PDX1, ZEB1, MEIS3, LHX2, POU2F3, HOXA7, HOXA10, GBX1, RHOX6, NKX2-9, ZHX1, ZHX2, SIX5, VAX2, RHOX9, DLX3, HOXC13, HIPK2, RHOX12, ZFHX2, ZFHX3, UNCX	1157	128	12826	2.42497	0.00822697	0.000458839	0.0309262
UP_SEQ_FEATURE	region of interest:Head	12	0.00731908	3.70482e-06	KRT19, KRT18, CGN, KRT7, KRT14, VIM, SYNC, KRT8, NEFH, KRT20, NEFL, NEFM	1032	25	11563	5.37814	0.00935512	0.00134184	0.00654641
GOTERM_CC_DIRECT	GO:0005882~intermediate filament	14	0.00853893	2.13532e-05	SYNC, VIM, KRT20, SLC1A4, KRT19, KRT18, PKP2, KRT7, KRT8, KRT14, NEFH, DSP, NEFL, NEFM	1073	39	11880	3.97448	0.01081	0.00120692	0.0308222
UP_SEQ_FEATURE	region of interest:Linker 12	10	0.00609923	4.32778e-06	KRT19, KRT18, KRT7, KRT14, VIM, KRT8, NEFH, KRT20, NEFL, NEFM	1032	17	11563	6.59086	0.0109196	0.00137151	0.00764714
GOTERM_CC_DIRECT	GO:0016020~membrane	501	0.305572	2.4039e-05	OSMR, PGF, GBGT1, L1CAM, TMEM140, CDH22, ACTG1, DIRAS1, APP, VNN1, HTR1D, CDH23, MAGI2, GATM, KIF5A, NCF1, LIFR, PTPRS, PTPRU, PIK3IP1, SIRPA, TMEM136, UNC13D, BACE1, ST14, ROR1, RYR1, RYR2, SURF1, IL1R2, RALGPS1, GNAI1, ALCAM, RAC3, CDC42EP3, IQSEC1, GUCY2G, MGAT4A, ACER2, GAS2, CLGN, TNK1, MARCKS, CD200, SYTL1, D630045J12RIK, GNAZ, SLC20A2, TRPV2, ATP10A, H2-D1, RTN1, MMP24, SLC23A1, KISS1R, IL…	1073	4840	11880	1.14606	0.0121614	0.00122285	0.0346984
GOTERM_MF_DIRECT	GO:0001077~transcriptional activator activity, RNA polymerase II core promoter proximal region sequence-specific binding	38	0.0231771	1.30956e-05	GLIS3, ELF1, ELF3, NDN, MITF, TBX20, PAX6, HOXD13, SOX4, NR3C1, PDX1, ZIC3, STAT6, GATA2, MEIS3, LHX2, POU2F3, HOXA7, HOXA10, CREB3L1, NFATC2, SSBP4, SSBP2, EPAS1, FOXJ2, FOXJ1, CEBPG, NKX2-9, SOX11, SIX5, NR4A3, DDIT3, DLX3, ATF4, HOXC13, JUN, KLF4, NFIB	991	193	10722	2.13024	0.01416	0.01416	0.0209134
UP_SEQ_FEATURE	domain:Fibronectin type-III 1	20	0.0121985	7.47004e-06	OBSCN, OSMR, TNC, LEPR, AXL, BZRAP1, NFASC, LIFR, ITGB4, PTPRS, L1CAM, PTPRU, EPHA1, EPHA4, EPHB6, PRLR, EPHA8, CNTN2, MERTK, FN1	1032	70	11563	3.20127	0.0187731	0.00210351	0.0131991
UP_SEQ_FEATURE	domain:Fibronectin type-III 2	20	0.0121985	7.47004e-06	OBSCN, OSMR, TNC, LEPR, AXL, BZRAP1, NFASC, LIFR, ITGB4, PTPRS, L1CAM, PTPRU, EPHA1, EPHA4, EPHB6, PRLR, EPHA8, CNTN2, MERTK, FN1	1032	70	11563	3.20127	0.0187731	0.00210351	0.0131991
UP_SEQ_FEATURE	region of interest:Tail	12	0.00731908	9.16717e-06	KRT18, CGN, KRT7, KRT14, VIM, SYNC, MYO15, KRT8, NEFH, KRT20, NEFL, NEFM	1032	27	11563	4.97976	0.0229888	0.00232302	0.0161976
UP_KEYWORDS	Amino-acid transport	11	0.00670916	6.87313e-05	SLC38A4, SLC6A9, SLC7A3, SLC7A1, SLC7A8, SLC3A2, XK, SLC3A1, SLC7A4, SLC7A5, SLC7A7	1157	27	12826	4.51634	0.0249768	0.00133038	0.0946614
UP_SEQ_FEATURE	region of interest:Linker 1	11	0.00670916	1.18081e-05	KRT19, KRT18, KRT7, KRT14, VIM, SYNC, KRT8, NEFH, KRT20, NEFL, NEFM	1032	23	11563	5.35865	0.029513	0.00271968	0.0208634
UP_SEQ_FEATURE	region of interest:Rod	11	0.00670916	1.18081e-05	KRT19, KRT18, KRT7, KRT14, VIM, SYNC, KRT8, NEFH, KRT20, NEFL, NEFM	1032	23	11563	5.35865	0.029513	0.00271968	0.0208634
UP_SEQ_FEATURE	region of interest:Coil 1A	11	0.00670916	1.18081e-05	KRT19, KRT18, KRT7, KRT14, VIM, SYNC, KRT8, NEFH, KRT20, NEFL, NEFM	1032	23	11563	5.35865	0.029513	0.00271968	0.0208634
UP_SEQ_FEATURE	region of interest:Coil 1B	11	0.00670916	1.18081e-05	KRT19, KRT18, KRT7, KRT14, VIM, SYNC, KRT8, NEFH, KRT20, NEFL, NEFM	1032	23	11563	5.35865	0.029513	0.00271968	0.0208634
SMART	SM01391:SM01391	11	0.00670916	9.9105e-05	KRT19, KRT18, KRT7, KRT14, VIM, SYNC, KRT8, NEFH, KRT20, NEFL, NEFM	677	25	6550	4.25702	0.0300646	0.0101237	0.132884
SMART	SM00630:Sema	11	0.00670916	0.000146317	SEMA5A, SEMA5B, SEMA6A, PLXNC1, SEMA6C, SEMA6D, SEMA3G, PLXNA2, SEMA4F, MET, PLXND1	677	26	6550	4.09328	0.0440683	0.011204	0.19613
INTERPRO	IPR018039:Intermediate filament protein, conserved site	10	0.00609923	2.87448e-05	KRT19, KRT18, KRT7, KRT14, VIM, KRT8, NEFH, KRT20, NEFL, NEFM	1105	20	12069	5.46109	0.044374	0.00903666	0.0480462
GOTERM_BP_DIRECT	GO:0018149~peptide cross-linking	7	0.00426946	1.29336e-05	EVPL, TGM1, ANXA1, TGM2, DSP, THBS1, FN1	1008	8	11126	9.65799	0.045247	0.0115089	0.0237449
UP_SEQ_FEATURE	domain:Ig-like C2-type 2	20	0.0121985	2.19597e-05	IL1R2, ICAM1, IL18RAP, CADM4, CADM1, AXL, NFASC, PTPRS, L1CAM, KIT, CXADR, KDR, ALCAM, IL1RAP, PDGFRA, CNTN2, PDGFRB, MERTK, CEACAM1, CSF1R	1032	75	11563	2.98786	0.0541889	0.00463194	0.0387968
UP_SEQ_FEATURE	domain:Ig-like C2-type 1	20	0.0121985	2.19597e-05	IL1R2, ICAM1, IL18RAP, CADM4, CADM1, AXL, NFASC, PTPRS, L1CAM, KIT, CXADR, KDR, ALCAM, IL1RAP, PDGFRA, CNTN2, PDGFRB, MERTK, CEACAM1, CSF1R	1032	75	11563	2.98786	0.0541889	0.00463194	0.0387968
INTERPRO	IPR001664:Intermediate filament protein	11	0.00670916	3.5764e-05	KRT19, KRT18, KRT7, KRT14, VIM, SYNC, KRT8, NEFH, KRT20, NEFL, NEFM	1105	25	12069	4.80576	0.0549074	0.0093679	0.0597752
INTERPRO	IPR016201:Plexin-like fold	13	0.007929	3.6844e-05	SEMA5A, SEMA5B, SEMA6A, PLXNC1, SEMA6C, SEMA6D, PLXNA2, SEMA3G, SEMA4F, MET, PLXDC2, ITGB4, PLXND1	1105	35	12069	4.05681	0.0565178	0.00827667	0.0615799
GOTERM_BP_DIRECT	GO:0007155~cell adhesion	49	0.0298862	1.69284e-05	ATP1B1, CADM4, CADM1, CLSTN3, TNC, FERMT1, ITGB4, L1CAM, CXADR, CDH3, CDH4, CDH5, SDC3, MMP24, ALCAM, CDH22, IGSF11, APP, HPSE, COL6A2, ACAN, THBS1, CD6, COL8A2, FN1, CDH23, ICAM1, OLR1, ADAM23, EFNB2, NFASC, ITGA1, PTPRS, CELSR3, NID2, PTPRU, IGSF9B, KITL, EPHA1, COL5A1, FARP2, MUC4, EPHA4, AMIGO3, EPHA8, ITGA8, CNTN2, SUSD5, ITGA2B	1008	285	11126	1.89771	0.0588044	0.0120477	0.0310779
GOTERM_CC_DIRECT	GO:0016324~apical plasma membrane	37	0.0225672	0.000150196	ATP1B1, OCLN, MAL2, OSMR, HSPA1A, JAG1, NAALADL1, SLC7A5, SLC23A1, SLC2A5, TRPV4, SLCO3A1, SCNN1A, UPK2, CEACAM1, FN1, HPN, SLC3A2, ANXA1, CRB3, MAL, FZD3, SHANK2, ANXA4, MUC4, SLC34A2, CYBA, SLC26A6, PROM2, ABCB1B, PDGFRB, AKAP7, STC1, ATP6V0A4, TJP3, IGFBP2, PDZK1	1073	212	11880	1.93234	0.073606	0.00692642	0.216613
GOTERM_CC_DIRECT	GO:0045121~membrane raft	33	0.0201275	0.00016077	ADCY1, RTN4RL1, MAL2, GNAI1, SLC6A2, H2-D1, L1CAM, ABCA1, CXADR, SDC4, SERPINH1, STAT6, PRSS8, TNFRSF1A, APP, SLC2A4, HPSE, DMD, NOS3, ICAM1, OLR1, EFNB1, ITGA1, ARID3A, MAL, NFAM1, KDR, PROM2, CPE, P2RX3, BACE1, PDZK1, FAIM2	1073	181	11880	2.01861	0.0785794	0.00679669	0.231846
INTERPRO	IPR001627:Semaphorin/CD100 antigen	11	0.00670916	5.3377e-05	SEMA5A, SEMA5B, SEMA6A, PLXNC1, SEMA6C, SEMA6D, SEMA3G, PLXNA2, SEMA4F, MET, PLXND1	1105	26	12069	4.62092	0.0808303	0.0104803	0.0892009
GOTERM_BP_DIRECT	GO:0071526~semaphorin-plexin signaling pathway	12	0.00731908	2.36825e-05	SEMA5A, SEMA5B, SEMA6A, PLXNC1, SEMA6C, SEMA6D, SEMA3G, PLXNA2, SEMA4F, MET, PLXND1, FARP2	1008	29	11126	4.56732	0.0812897	0.0140314	0.0434748
SMART	SM00389:HOX	26	0.015858	0.000290164	EVX1, HOXA11, PAX6, HOXB13, HOXD13, PAX3, PDX1, MEIS3, LHX2, POU2F3, HOXA7, HOXA10, GBX1, RHOX6, NKX2-9, ZHX1, ZHX2, SIX5, VAX2, RHOX9, DLX3, HOXC13, RHOX12, ZFHX2, ZFHX3, UNCX	677	117	6550	2.15001	0.0855051	0.0177178	0.388602
UP_KEYWORDS	Extracellular matrix	24	0.0146382	0.000306439	PODN, ADAMTS20, TNC, ADAMTS15, COL22A1, NID2, ECM1, TIMP3, EMILIN3, COL5A1, MMP12, MMP24, HMCN2, ADAMTS8, CILP2, COL27A1, THSD4, ACAN, COL6A2, ADAMTS1, COL11A2, COL8A2, WNT7A, FN1	1157	118	12826	2.25469	0.106659	0.00562347	0.421408
INTERPRO	IPR001356:Homeodomain	26	0.015858	8.09334e-05	EVX1, HOXA11, PAX6, HOXB13, HOXD13, PAX3, PDX1, MEIS3, LHX2, POU2F3, HOXA7, HOXA10, GBX1, RHOX6, NKX2-9, ZHX1, ZHX2, SIX5, VAX2, RHOX9, DLX3, HOXC13, RHOX12, ZFHX2, ZFHX3, UNCX	1105	121	12069	2.34691	0.11997	0.0140996	0.135223
INTERPRO	IPR020846:Major facilitator superfamily domain	21	0.0128084	8.76996e-05	SLC2A12, SLC16A13, SLCO4A1, SLC22A7, SLC22A21, MFSD2A, ABCA1, SLC2A7, SLC2A6, SLC2A5, SLC16A4, SLC2A4, SLC2A3, MFSD7C, SLC16A9, MFSD7B, MFSD7A, SLCO3A1, MFSD12, SLCO5A1, SLC17A9	1105	87	12069	2.63639	0.129323	0.0137529	0.14652
GOTERM_BP_DIRECT	GO:0032526~response to retinoic acid	14	0.00853893	4.01996e-05	RBP4, HSD17B2, ACER2, PPARG, AQP3, LEFTY1, CD38, DKK1, PTGES, PDGFRB, IGFBP2, KLF4, BMP6, MEST	1008	41	11126	3.76897	0.134041	0.0203497	0.0737851
GOTERM_MF_DIRECT	GO:0004714~transmembrane receptor protein tyrosine kinase activity	13	0.007929	0.000133326	MET, AXL, KIT, ALK, EPHA1, KDR, EPHA4, EPHA8, ROR1, PDGFRA, PDGFRB, MERTK, CSF1R	991	39	10722	3.60646	0.135152	0.070028	0.212727
UP_KEYWORDS	Protease	47	0.0286664	0.000464173	CPM, REN1, ADAMTS15, BAP1, GGT1, CTSA, MMP28, NAALADL1, FAM63B, OTUB2, MMP24, PRSS8, C1RA, USP18, DPEP3, OTUD7A, HTRA3, PRSS12, STAMBP, AGBL2, KLK7, HPN, KLK8, UFSP1, ADAMTS20, FAM188B, CTSR, MMP14, RHBDD1, PSMB8, MMP12, PSMB9, USP29, GZMM, USP28, ADAMTS8, CTSJ, CPE, CTSO, ST14, CPXM1, BACE1, ADAMTS1, CTSC, PRSS42, USP25, PRSS46	1157	309	12826	1.68615	0.157057	0.00810296	0.637678
UP_KEYWORDS	Keratin	6	0.00365954	0.000545354	KRT19, KRT18, KRT7, KRT14, KRT8, KRT20	1157	9	12826	7.39038	0.181879	0.00908326	0.748815
GOTERM_MF_DIRECT	GO:0005509~calcium ion binding	57	0.0347656	0.000194461	CLSTN3, SUSD1, SYT8, SYT9, DLK2, JAG1, MMP28, PSPH, MMP24, CDH22, HMCN2, C1RA, EFHD1, SLC25A24, SLC24A3, SLC24A1, PLS1, CDH23, SCUBE3, SCUBE1, PADI2, MMP14, MMP12, THBD, PPEF2, RYR1, C2CD4C, RYR2, MCC, CALR3, TBC1D8B, LCP1, MYL4, REPS2, CABP7, CDH3, CDH4, CDH5, ANXA8, MACF1, TGM2, ACAN, THBS1, EHD2, TESC, ANXA1, CELSR3, MYLPF, NID2, ANXA4, ANXA3, CLGN, EFHB, MEGF6, SYTL1, VLDLR, CACNA1B	991	375	10722	1.64454	0.190865	0.0681621	0.31013
UP_SEQ_FEATURE	domain:Sema	10	0.00609923	8.88503e-05	SEMA5A, SEMA5B, SEMA6A, PLXNC1, SEMA6C, SEMA6D, SEMA3G, PLXNA2, SEMA4F, MET	1032	23	11563	4.8715	0.201822	0.0171908	0.156887
PIR_SUPERFAMILY	PIRSF000615:tyrosine-protein kinase, CSF-1/PDGF receptor type	5	0.00304962	0.00235622	PDGFRA, PDGFRB, KIT, CSF1R, KDR	123	7	1256	7.29384	0.223076	0.223076	2.61681
GOTERM_MF_DIRECT	GO:0005216~ion channel activity	18	0.0109786	0.000273849	HCN2, KCNC4, GABRB3, TRPV2, GRIK3, CNGA3, GJC1, KCNS3, P2RX3, RYR1, CHRNA4, TRPV4, RYR2, CACNA1C, KCNQ2, SCN5A, KCNH3, CACNA1B	991	73	10722	2.66779	0.257893	0.0718533	0.436478
UP_SEQ_FEATURE	propeptide:Activation peptide	9	0.00548931	0.000120143	PRSS8, KLK7, CTSJ, CPE, REN1, CTSO, CTSR, MMP12, SRGN	1032	19	11563	5.30737	0.262744	0.0215376	0.212086
UP_KEYWORDS	Symport	15	0.00914885	0.000858254	SLC16A13, SLC38A4, SLC6A2, SLC20A2, SLC6A12, SLC12A5, MFSD2A, SLC34A2, SLC1A4, SLC6A9, SLC23A1, SLC16A4, SLC24A3, SLC16A9, SLC1A6	1157	61	12826	2.72596	0.270921	0.013644	1.1761
INTERPRO	IPR017970:Homeobox, conserved site	20	0.0121985	0.000227574	EVX1, HOXA11, NKX2-9, PAX6, HOXB13, HOXD13, SIX5, VAX2, PDX1, PAX3, DLX3, HOXC13, LHX2, POU2F3, HOXA7, HOXA10, GBX1, ZFHX2, ZFHX3, UNCX	1105	86	12069	2.54004	0.301891	0.0321429	0.379789
KEGG_PATHWAY	mmu04974:Protein digestion and absorption	12	0.00731908	0.00148882	ATP1B1, SLC8A2, COL27A1, COL6A3, COL22A1, SLC7A8, COL6A2, SLC3A2, SLC3A1, COL11A2, COL5A1, SLC7A7	453	41	4605	2.97529	0.317111	0.11939	1.92404
KEGG_PATHWAY	mmu04640:Hematopoietic cell lineage	12	0.00731908	0.00148882	IL1R2, CD38, CD37, TFRC, CD59A, ITGA1, EPOR, KIT, KITL, IL3RA, CSF1R, ITGA2B	453	41	4605	2.97529	0.317111	0.11939	1.92404
UP_KEYWORDS	GPI-anchor	16	0.00975878	0.00103703	LY6A, ART4, LY6C1, CPM, LYPD3, RTN4RL1, CD59A, CD177, MFI2, DPEP3, CNTN2, VNN1, EFNA5, GFRA4, NRN1, NT5E	1157	69	12826	2.57057	0.317384	0.0157834	1.41946
UP_KEYWORDS	Exocytosis	13	0.007929	0.00107861	CPLX2, UNC13D, RAB3D, MICAL3, SCRN1, EXOC3L, EXOC6, PAK1, RIMS2, SYTL1, RIMS4, SLC17A9, RIMS3	1157	49	12826	2.94107	0.327762	0.0157602	1.47599
GOTERM_BP_DIRECT	GO:0007169~transmembrane receptor protein tyrosine kinase signaling pathway	18	0.0109786	0.0001249	MET, KIT, ALK, EPHA1, KDR, EPHA4, EPHB6, DOK2, EPHA8, PTK6, PDGFRA, ROR1, PDGFRB, TNK1, JAK3, GFRA4, ANGPT2, CSF1R	1008	70	11126	2.83827	0.360566	0.0543629	0.229083
INTERPRO	IPR009003:Trypsin-like cysteine/serine peptidase domain	12	0.00731908	0.00032732	GZMM, PRSS8, KLK7, C1RA, HPN, KLK8, ST14, FAM111A, HTRA3, PRSS42, PRSS12, PRSS46	1105	37	12069	3.54233	0.403647	0.0421623	0.545825
UP_KEYWORDS	Ion transport	49	0.0298862	0.00140386	LRRC8E, SLC39A14, SLC38A4, KCNC4, ATP1B1, KCNAB3, AQP9, GABRB3, SLC20A2, LRRC8B, GRIK3, TRPV2, LRRC8D, SFXN5, KCNS3, SLC23A1, SLC24A3, KCNK6, SLC39A8, TRPV4, CHRNA4, SLCO3A1, SLCO5A1, KCNQ2, SCNN1A, SCN5A, NIPAL4, HCN2, SLC8A2, TMC8, SLCO4A1, SLC22A7, SLC12A5, MFI2, SLC22A21, CNGA3, SLC34A2, BSPRY, SLC26A6, ATP6V0E2, P2RX3, CACNA1G, RYR1, RYR2, ATP6V0A4, CACNA1C, STEAP2, KCNH3, CACNA1B	1157	343	12826	1.58365	0.403683	0.0196876	1.91709
GOTERM_BP_DIRECT	GO:0055085~transmembrane transport	39	0.023787	0.000156616	SLC2A12, SLC16A13, SLC39A14, KCNC4, TRPV2, SFXN5, KCNS3, SLC23A1, SLC2A5, SLC2A4, MFSD7C, SLC25A24, SLC2A3, SLC24A3, TAP2, MFSD7B, TAP1, MFSD7A, SLC39A8, TRPV4, KCNQ2, SCN5A, HCN2, GPR155, SLC8A2, SLC22A7, SLC12A5, SLC22A21, CNGA3, SLC26A6, SLC16A4, ABCB1B, SLC16A9, RYR1, RYR2, CACNA1C, KCNH3, SLC17A9, CACNA1B	1008	228	11126	1.88803	0.429208	0.0604021	0.287174
COG_ONTOLOGY	Secondary metabolites biosynthesis, transport, and catabolism	6	0.00365954	0.0263568	CYP11A1, CYP4F17, CYP2S1, CYP21A1, CYP4F13, CYP26A1	106	25	1499	3.39396	0.429316	0.429316	18.6363
GOTERM_BP_DIRECT	GO:0007411~axon guidance	23	0.0140282	0.000169138	KIF5A, EFNB1, EFNB2, PAX6, NFASC, DPYSL5, L1CAM, TTC8, NR4A3, CDH4, SEMA5A, ALCAM, EPHA4, SEMA6A, SEMA6C, EPHA8, ANK3, SEMA4F, LHX2, CNTN2, EFNA5, KIF26A, CSF1R	1008	106	11126	2.39497	0.454234	0.0587593	0.3101
GOTERM_CC_DIRECT	GO:0031225~anchored component of membrane	16	0.00975878	0.00122326	LY6A, ART4, LY6C1, CPM, LYPD3, RTN4RL1, CD59A, CD177, MFI2, DPEP3, CNTN2, VNN1, EFNA5, GFRA4, NRN1, NT5E	1073	70	11880	2.53069	0.463677	0.0467943	1.75152
UP_KEYWORDS	Ion channel	26	0.015858	0.00171619	LRRC8E, KCNC4, KCNAB3, GABRB3, LRRC8B, TRPV2, GRIK3, LRRC8D, KCNS3, KCNK6, CHRNA4, TRPV4, KCNQ2, SCN5A, SCNN1A, HCN2, TMC8, CNGA3, SLC26A6, P2RX3, CACNA1G, RYR1, RYR2, CACNA1C, KCNH3, CACNA1B	1157	149	12826	1.93439	0.468525	0.0231392	2.33893
GOTERM_CC_DIRECT	GO:0016323~basolateral plasma membrane	24	0.0146382	0.00126729	CLDN7, ATP1B1, SLC8A2, CADM1, AQP9, LEPR, SLC22A7, ANXA1, SLC7A8, HSPA1A, CXADR, ADORA1, AQP3, SLC7A7, SLC26A6, PROM2, TFRC, ANK3, VAMP8, ST14, TGFA, DSP, DLG3, HPGD	1073	130	11880	2.04402	0.475579	0.0450577	1.81404
INTERPRO	IPR005821:Ion transport domain	14	0.00853893	0.000417605	KCNS3, HCN2, KCNC4, TRPV2, RYR1, CACNA1G, RYR2, TRPV4, KCNQ2, CNGA3, CACNA1C, KCNH3, SCN5A, CACNA1B	1105	50	12069	3.05821	0.482908	0.049468	0.695886
UP_KEYWORDS	Transducer	26	0.015858	0.00188772	GNAZ, GNA15, GPR162, GPR157, PTGER4, GNAI1, ADCYAP1R1, CELSR3, PROKR1, FZD3, CXCR2, FZD5, ADORA1, FZD7, GPR153, PLCL2, CCRL2, GNAL, KISS1R, S1PR1, LPAR5, LPAR6, GRM6, GPR50, ADRA2B, HTR1D	1157	150	12826	1.9215	0.501094	0.0245277	2.5699
UP_KEYWORDS	Cell junction	60	0.0365954	0.00188995	PRX, CLDN7, OCLN, CLDN9, GABRB3, CADM1, GRIK3, FERMT1, SYT9, CXADR, ATCAY, DMXL2, ANK3, WNK4, SNTB1, TRPV4, CHRNA4, PAK1, CEACAM1, MAGI2, BSN, PTPRU, FBP2, FMN1, TNS4, DACT1, EVPL, CGN, DSP, OPHN1, LCP1, FAIM2, ITGB4, RIMS2, NRN1, APBB1IP, CDH5, RIMS4, GJC1, RIMS3, DMD, MARVELD3, PPL, OLFM2, LRFN2, DIXDC1, DLGAP1, DLGAP3, CRB3, RGS17, IGSF9B, SHANK1, SHANK2, RUFY3, KDR, EPHA4, ZFP185, AMOT, TJP3,…	1157	448	12826	1.48467	0.501504	0.0237196	2.57289
GOTERM_BP_DIRECT	GO:0006865~amino acid transport	11	0.00670916	0.000196542	SLC38A4, SLC6A9, SLC7A3, SLC7A1, SLC7A8, SLC3A2, XK, SLC3A1, SLC7A4, SLC7A5, SLC7A7	1008	30	11126	4.04716	0.505243	0.0619685	0.360258
KEGG_PATHWAY	mmu05416:Viral myocarditis	11	0.00670916	0.0028366	ACTG1, H2-K1, ICAM1, RAC3, DMD, H2-D1, H2-T23, H2-T24, CD40, H2-DMA, CXADR	453	38	4605	2.94266	0.51674	0.166232	3.63626
SMART	SM00408:IGc2	24	0.0146382	0.00236537	IL1R2, OBSCN, CADM4, CADM1, PSG19, NFASC, PTPRS, L1CAM, KIT, IGSF9B, CXADR, KDR, HMCN2, LINGO1, IGSF11, CILP2, PDGFRA, CNTN2, ROR1, PDGFRB, MFAP3L, CEACAM1, CSF1R, LRFN2	677	120	6550	1.93501	0.5178	0.114467	3.12734
INTERPRO	IPR002165:Plexin	9	0.00548931	0.000475203	SEMA5A, SEMA6A, PLXNC1, SEMA6D, PLXNA2, SEMA4F, MET, PLXDC2, PLXND1	1105	22	12069	4.46816	0.527881	0.0521972	0.791508
SMART	SM00020:Tryp_SPc	10	0.00609923	0.00245054	GZMM, PRSS8, KLK7, C1RA, HPN, KLK8, ST14, PRSS42, PRSS12, PRSS46	677	30	6550	3.22501	0.530315	0.102333	3.23825
INTERPRO	IPR003598:Immunoglobulin subtype 2	24	0.0146382	0.00048484	IL1R2, OBSCN, CADM4, CADM1, PSG19, NFASC, PTPRS, L1CAM, KIT, IGSF9B, CXADR, KDR, HMCN2, LINGO1, IGSF11, CILP2, PDGFRA, CNTN2, ROR1, PDGFRB, MFAP3L, CEACAM1, CSF1R, LRFN2	1105	120	12069	2.18443	0.535014	0.0497688	0.807499
GOTERM_MF_DIRECT	GO:0005215~transporter activity	21	0.0128084	0.000703767	SLC2A12, RBP4, AQP9, SLCO4A1, SLC12A5, SLC22A21, SEC14L5, ABCA1, SEC14L2, ABCA3, AQP3, SLC23A1, SLC2A5, SLC2A4, ABCB1B, SLC2A3, TMEM184A, SLCO3A1, STEAP2, SLCO5A1, SLC17A9	991	100	10722	2.27207	0.535444	0.142157	1.11811
GOTERM_MF_DIRECT	GO:0043565~sequence-specific DNA binding	60	0.0365954	0.000708388	BMI1, ELF1, ELF3, EVX1, PPARG, MITF, PAX6, HOXD13, PDX1, ZEB1, PAX3, ZIC3, GLI1, GATA2, GTF2E1, CREB3L1, CREB3L3, BATF3, SOX13, FOXJ2, FOXJ1, NKX2-9, MLXIPL, VAX2, SIX5, AHR, DDIT3, ASCL2, HOXC13, JUN, PRDM1, UNCX, HOXA11, HOXB13, NR3C1, HIC1, STAT6, VDR, T, MEIS3, LHX2, POU2F3, HOXA7, HOXA10, GBX1, NFATC2, ERG, EPAS1, CEBPG, NR4A3, DLX3, ATF5, ATF4, ETS1, ZBTB4, HIVEP2, ZFP532, ZFHX2, ZFHX3, KLF4	991	421	10722	1.54195	0.537777	0.12069	1.12541
GOTERM_BP_DIRECT	GO:0008285~negative regulation of cell proliferation	46	0.0280565	0.000224768	INSL3, ACVRL1, PODN, NDN, TRPV2, PPARG, TGFB3, PAX6, SOX4, BAP1, HSPA1A, ZEB1, PDX1, ADORA1, CDH5, H19, VDR, KISS1R, PTGES, MTBP, NOS3, CHD5, TWIST2, CSF1R, TESC, MAGI2, ITGA1, SIX5, WNK2, PTPRU, FZD5, LEFTY1, ATF5, TNFRSF9, RASSF5, CD37, SFRP1, PKP2, RPS6KA2, JUN, NRK, RIPPLY3, LDOC1, SMARCA2, KLF4, NFIB	1008	290	11126	1.75081	0.552805	0.0648641	0.411895
BIOCARTA	m_nuclearRsPathway:Nuclear Receptors in Lipid Metabolism and Toxicity	6	0.00365954	0.00508192	VDR, ABCB1B, PPARG, CYP26A1, ABCA1, ABCG1	94	13	968	4.75286	0.55969	0.55969	5.97275
INTERPRO	IPR011598:Myc-type, basic helix-loop-helix (bHLH) domain	16	0.00975878	0.000522209	EPAS1, MITF, MLXIPL, HES6, AHR, MXD4, ASCL2, ID2, ID1, GM4969, ATOH8, ID3, BHLHE40, BHLHE41, TCF15, TWIST2	1105	64	12069	2.73054	0.56167	0.0502429	0.869482
UP_KEYWORDS	G-protein coupled receptor	21	0.0128084	0.00225658	GPR162, GPR157, PTGER4, ADCYAP1R1, CELSR3, PROKR1, CXCR2, FZD3, FZD5, ADORA1, FZD7, GPR153, CCRL2, KISS1R, S1PR1, LPAR5, LPAR6, GRM6, GPR50, ADRA2B, HTR1D	1157	112	12826	2.07854	0.564543	0.0273315	3.06484
UP_SEQ_FEATURE	short sequence motif:PDZ-binding	13	0.007929	0.000339069	DLGAP1, EFNB1, EFNB2, CRB3, FZD5, CXADR, EPHA1, FZD7, EPHA4, EPHB6, DACT1, EPHA8, AMOT	1032	44	11563	3.31041	0.576992	0.0557437	0.597462
KEGG_PATHWAY	mmu04080:Neuroactive ligand-receptor interaction	17	0.0103687	0.00358939	PTGER4, GABRB3, GRIK3, ADCYAP1R1, LEPR, NR3C1, ADORA1, KISS1R, S1PR1, PRLR, LPAR6, P2RX3, GRM6, CHRNA4, GPR50, ADRA2B, HTR1D	453	79	4605	2.18753	0.601694	0.168153	4.58055
GOTERM_MF_DIRECT	GO:0005198~structural molecule activity	18	0.0109786	0.000848774	CLDN7, CLDN9, SYNC, VIM, ANXA1, KRT20, KRT19, EVPL, KRT18, KRT7, KRT8, KRT14, SNTB1, NEFH, DSP, NEFL, NEFM, ADD2	991	80	10722	2.43436	0.603352	0.123748	1.34703
INTERPRO	IPR013151:Immunoglobulin	10	0.00609923	0.000603317	IL1R2, IL18RAP, SEMA3G, NFASC, PDGFRB, KIT, CXADR, MERTK, CD200, CSF1R	1105	28	12069	3.90078	0.614389	0.0545123	1.00389
KEGG_PATHWAY	mmu04145:Phagosome	20	0.0121985	0.00378882	H2-K1, MRC1, OLR1, NCF1, H2-D1, ACTG1, C1RA, CYBA, CORO1A, ATP6V0E2, TFRC, TAP2, TAP1, TUBA4A, H2-T23, H2-T24, THBS1, H2-DMA, ATP6V0A4, TUBB4A	453	101	4605	2.01298	0.621591	0.149528	4.82928
GOTERM_MF_DIRECT	GO:0015293~symporter activity	15	0.00914885	0.000908807	SLC16A13, SLC38A4, SLC6A2, SLC20A2, SLC6A12, SLC12A5, MFSD2A, SLC34A2, SLC1A4, SLC6A9, SLC23A1, SLC16A4, SLC24A3, SLC16A9, SLC1A6	991	60	10722	2.70484	0.628476	0.116415	1.44166
GOTERM_MF_DIRECT	GO:0097110~scaffold protein binding	11	0.00670916	0.00092375	KRT18, DLGAP3, VIM, KRT8, CACNA1G, RYR2, DSP, NOS3, SHANK1, SCN5A, PHF6	991	35	10722	3.40037	0.634478	0.1058	1.4652
UP_SEQ_FEATURE	short sequence motif:Cell attachment site	13	0.007929	0.000425382	ICAM1, TGFB3, ITGB4, L1CAM, NID2, TFRC, ITGA8, CNTN2, ACAN, COL6A2, IGFBP2, THBS1, FN1	1032	45	11563	3.23684	0.660209	0.0652387	0.749013
SMART	SM00219:TyrKc	15	0.00914885	0.00358384	MET, AXL, KIT, ALK, EPHA1, KDR, EPHA4, EPHA8, PTK6, PDGFRA, PDGFRB, TNK1, JAK3, MERTK, CSF1R	677	62	6550	2.34073	0.669056	0.129098	4.70277
SMART	SM00353:HLH	15	0.00914885	0.00358384	EPAS1, MITF, MLXIPL, HES6, AHR, MXD4, ASCL2, ID2, ID1, ATOH8, ID3, BHLHE40, BHLHE41, TCF15, TWIST2	677	62	6550	2.34073	0.669056	0.129098	4.70277
GOTERM_BP_DIRECT	GO:0031133~regulation of axon diameter	5	0.00304962	0.000309639	CNTN2, XK, NEFL, WNT7A, NEFM	1008	5	11126	11.0377	0.670005	0.0817476	0.567005
GOTERM_BP_DIRECT	GO:0045110~intermediate filament bundle assembly	5	0.00304962	0.000309639	PKP2, KRT14, NEFH, NEFL, NEFM	1008	5	11126	11.0377	0.670005	0.0817476	0.567005
GOTERM_MF_DIRECT	GO:0045499~chemorepellent activity	8	0.00487939	0.00104426	SEMA5A, SEMA5B, SEMA6A, SEMA6C, SEMA6D, SEMA3G, SEMA4F, EFNA5	991	19	10722	4.55553	0.679475	0.107545	1.65485
GOTERM_MF_DIRECT	GO:0008233~peptidase activity	47	0.0286664	0.00106808	CPM, REN1, APH1C, ADAMTS15, BAP1, GGT1, CTSA, NAALADL1, FAM63B, OTUB2, MMP24, PRSS8, C1RA, USP18, DPEP3, OTUD7A, HTRA3, PRSS12, STAMBP, AGBL2, KLK7, HPN, KLK8, UFSP1, ADAMTS20, FAM188B, CTSR, MMP14, RHBDD1, PSMB8, MMP12, PSMB9, USP29, USP28, ADAMTS8, CTSJ, CPE, CTSO, ST14, THSD4, CPXM1, BACE1, ADAMTS1, CTSC, PRSS42, USP25, PRSS46	991	314	10722	1.61946	0.687689	0.100392	1.69229
SMART	SM00209:TSP1	10	0.00609923	0.00398124	SEMA5A, SEMA5B, ADAMTS9, CILP2, ADAMTS8, ADAMTS20, ADAMTS15, THSD4, ADAMTS1, THBS1	677	32	6550	3.02345	0.707319	0.12761	5.21145
INTERPRO	IPR001245:Serine-threonine/tyrosine-protein kinase catalytic domain	22	0.0134183	0.000781021	GUCY2G, ACVRL1, MET, AXL, NPR2, KIT, ALK, EPHA1, KDR, EPHA4, EPHB6, EPHA8, MAP3K9, PTK6, PDGFRA, ROR1, PDGFRB, TNK1, MLKL, JAK3, MERTK, CSF1R	1105	109	12069	2.20448	0.708791	0.0662436	1.29777
GOTERM_CC_DIRECT	GO:0048786~presynaptic active zone	8	0.00487939	0.00242417	BSN, FZD3, DGKI, RIMS2, SHANK2, ADORA1, RIMS4, RIMS3	1073	22	11880	4.0261	0.709282	0.0790596	3.44323
KEGG_PATHWAY	mmu04612:Antigen processing and presentation	11	0.00670916	0.00514566	H2-K1, HSPA2, TAP2, TAP1, H2-D1, H2-T23, HSPA1A, H2-T24, HSPA1B, H2-DMA, TAPBP	453	41	4605	2.72735	0.733049	0.17194	6.50569
UP_SEQ_FEATURE	domain:Fibronectin type-III 3	13	0.007929	0.000529514	OBSCN, OSMR, TNC, LEPR, BZRAP1, NFASC, LIFR, ITGB4, CNTN2, PTPRS, L1CAM, PTPRU, FN1	1032	46	11563	3.16648	0.73913	0.0759999	0.931559
UP_SEQ_FEATURE	domain:Fibronectin type-III 4	11	0.00670916	0.000545558	OSMR, TNC, LEPR, NFASC, LIFR, ITGB4, CNTN2, PTPRS, L1CAM, PTPRU, FN1	1032	34	11563	3.62497	0.74954	0.0740308	0.959657
GOTERM_CC_DIRECT	GO:0042629~mast cell granule	6	0.00365954	0.00273541	CPLX2, ANXA1, CXCR2, NR4A3, KIT, SRGN	1073	12	11880	5.53588	0.751976	0.0834506	3.87722
KEGG_PATHWAY	mmu04060:Cytokine-cytokine receptor interaction	19	0.0115885	0.00554263	IL1R2, IL2RB, IL18RAP, OSMR, LEPR, LIFR, TGFB3, CXCR2, CD40, IL17RA, TNFRSF9, TNFRSF1A, TNFSF11, PRLR, IL1RAP, IL15RA, EPOR, IL3RA, CSF1R	453	97	4605	1.99119	0.758977	0.162938	6.99099
UP_SEQ_FEATURE	region of interest:Coil 2	8	0.00487939	0.000579547	KRT19, KRT18, KRT7, KRT14, VIM, SYNC, KRT8, KRT20	1032	18	11563	4.97976	0.770244	0.074487	1.01916
KEGG_PATHWAY	mmu05330:Allograft rejection	6	0.00365954	0.00588344	H2-K1, H2-D1, H2-T23, H2-T24, CD40, H2-DMA	453	13	4605	4.6918	0.779225	0.154516	7.40576
KEGG_PATHWAY	mmu05320:Autoimmune thyroid disease	6	0.00365954	0.00588344	H2-K1, H2-D1, H2-T23, H2-T24, CD40, H2-DMA	453	13	4605	4.6918	0.779225	0.154516	7.40576
UP_KEYWORDS	Carboxypeptidase	6	0.00365954	0.00409834	AGBL2, CPM, CPE, CPXM1, CTSA, NAALADL1	1157	13	12826	5.11642	0.779375	0.047582	5.50148
KEGG_PATHWAY	mmu04512:ECM-receptor interaction	13	0.007929	0.00598697	TNC, ITGA1, ITGB4, SDC4, COL5A1, ITGA8, COL27A1, COL6A3, COL6A2, THBS1, COL11A2, FN1, ITGA2B	453	55	4605	2.40277	0.785033	0.142494	7.53142
INTERPRO	IPR002293:Amino acid/polyamine transporter I	6	0.00365954	0.00108068	SLC7A3, SLC7A1, SLC7A8, SLC7A4, SLC7A5, SLC7A7	1105	10	12069	6.5533	0.818648	0.0859397	1.79147
COG_ONTOLOGY	Signal transduction mechanisms / Cytoskeleton / Cell division and chromosome partitioning / General function prediction only	5	0.00304962	0.0815842	WDR66, TESC, PPEF2, SLC25A24, MYLPF	106	24	1499	2.94615	0.832573	0.590821	48.1661
INTERPRO	IPR020635:Tyrosine-protein kinase, catalytic domain	15	0.00914885	0.00117411	MET, AXL, KIT, ALK, EPHA1, KDR, EPHA4, EPHA8, PTK6, PDGFRA, PDGFRB, TNK1, JAK3, MERTK, CSF1R	1105	62	12069	2.64246	0.843548	0.0885789	1.94492
GOTERM_MF_DIRECT	GO:0004888~transmembrane signaling receptor activity	14	0.00853893	0.00171316	MRC1, GPR157, ADCYAP1R1, LEPR, CELSR3, FZD3, TLR5, NFAM1, FZD5, FZD7, SEMA6A, THBD, EPOR, ANTXR1	991	57	10722	2.65739	0.845449	0.144101	2.70134
GOTERM_CC_DIRECT	GO:0030424~axon	38	0.0231771	0.00381344	KCNC4, CADM1, RAP1GAP, TRPV2, GRIK3, ALDOC, VIM, L1CAM, SDC3, ALCAM, ATCAY, TNFRSF1A, APP, AP3M2, ANK3, NEFH, MGLL, PAK1, NEFL, PRSS12, NEFM, HCN2, KIF5A, CRYAB, NFASC, BSN, FZD3, ALK, RUFY3, ANXA3, EPHA4, SEMA6A, CORO1A, P2RX3, BACE1, PDGFRA, CNTN2, MYH14	1073	261	11880	1.61198	0.856977	0.108096	5.36644
GOTERM_CC_DIRECT	GO:0016327~apicolateral plasma membrane	7	0.00426946	0.00382206	CLDN7, KRT19, OCLN, THBD, PRICKLE2, KRT8, CXADR	1073	18	11880	4.30568	0.857605	0.102629	5.37826
COG_ONTOLOGY	Posttranslational modification, protein turnover, chaperones	12	0.00731908	0.0886423	MOCOS, RNF130, DZIP3, ABCB1B, PTAR1, DNAJC12, GSTT3, HTRA3, DNAJB4, USP25, PSMB8, MARS	106	101	1499	1.68018	0.857614	0.477818	51.1636
GOTERM_CC_DIRECT	GO:0030670~phagocytic vesicle membrane	10	0.00609923	0.00385354	H2-K1, RAB32, CORO1A, IRGM1, RAB43, TAP1, H2-D1, H2-T23, ANXA3, TAPBP	1073	36	11880	3.07549	0.859878	0.0982642	5.42142
UP_KEYWORDS	Ligand-gated ion channel	8	0.00487939	0.0053475	HCN2, GABRB3, P2RX3, GRIK3, RYR1, CHRNA4, RYR2, CNGA3	1157	25	12826	3.54738	0.860983	0.0597987	7.12164
INTERPRO	IPR018114:Peptidase S1, trypsin family, active site	9	0.00548931	0.00125407	GZMM, PRSS8, KLK7, HPN, KLK8, ST14, PRSS42, PRSS12, PRSS46	1105	25	12069	3.93198	0.862128	0.0900391	2.07609
GOTERM_CC_DIRECT	GO:0042383~sarcolemma	17	0.0103687	0.00396262	ATP1B1, SYNC, ANXA1, KRT19, SLC2A5, SLC2A4, ANK3, DMD, COL6A3, KRT8, SNTB1, COL6A2, RYR1, RYR2, NOS3, CACNA1C, SCN5A	1073	86	11880	2.1886	0.867475	0.0961114	5.57083
UP_KEYWORDS	Lipoprotein	64	0.0390351	0.00572792	GNAZ, APOBEC3, LYPD3, CXADR, ADORA1, ART4, TSPAN12, DIRAS1, CHIC1, S1PR1, 1700019D03RIK, DPEP3, VNN1, CHRNA4, TGFA, NOS3, ERAS, ARL5C, NT5E, MFI2, BSN, ALDH3B2, RND2, ZDHHC14, GNAL, LPAR6, CD59A, BACE1, CNTN2, DSP, EFNA5, AKAP7, RASD1, GBP2, CPM, RTN4RL1, RAB3D, GNAI1, IFITM2, PHKA1, ITGB4, ABCA1, NRN1, LY6A, RNF125, GLIPR2, PPP1R16B, RAB43, RAC3, CD177, ADRA2B, DNAJA4, LY6C1, TESC, OLR1, MAL, AB…	1157	509	12826	1.39386	0.879238	0.06205	7.6099
UP_KEYWORDS	Serine protease	12	0.00731908	0.00582398	GZMM, PRSS8, KLK7, C1RA, HPN, KLK8, ST14, HTRA3, PRSS42, RHBDD1, PRSS12, PRSS46	1157	52	12826	2.55821	0.883457	0.0612634	7.73282
GOTERM_MF_DIRECT	GO:0004930~G-protein coupled receptor activity	22	0.0134183	0.00198523	GPR162, GPR157, PTGER4, ADCYAP1R1, CELSR3, PROKR1, CXCR2, FZD3, FZD5, ADORA1, GPR179, FZD7, GPR153, CCRL2, KISS1R, S1PR1, SFRP1, LPAR5, LPAR6, GRM6, GPR50, HTR1D	991	116	10722	2.05195	0.885142	0.153349	3.12399
INTERPRO	IPR001254:Peptidase S1	10	0.00609923	0.00137052	GZMM, PRSS8, KLK7, C1RA, HPN, KLK8, ST14, PRSS42, PRSS12, PRSS46	1105	31	12069	3.52328	0.885312	0.0937443	2.2668
UP_KEYWORDS	Immunity	32	0.0195176	0.00592444	APOBEC3, CADM1, IFITM2, OAS3, H2-D1, TLR5, ISG20, ALCAM, RNF125, C1RA, TMEM173, TAP2, TAP1, IL1RAP, CSF1R, H2-K1, IRGM1, LGALS3, OLR1, ANXA1, AXL, CD40, AIM2, PSMB8, PSMB9, PRKD1, ETS1, H2-T23, OAS1A, JAK3, PRDM1, H2-DMA	1157	215	12826	1.64994	0.887711	0.0605649	7.8612
INTERPRO	IPR008266:Tyrosine-protein kinase, active site	17	0.0103687	0.00139561	OBSCN, MET, AXL, KIT, ALK, EPHA1, KDR, EPHA4, EPHA8, PTK6, PDGFRA, ROR1, PDGFRB, TNK1, JAK3, MERTK, CSF1R	1105	77	12069	2.41139	0.889772	0.0914256	2.30783
SMART	SM00233:PH	36	0.0219572	0.00722062	FGD2, RALGPS1, ARHGEF26, FERMT1, ASAP3, APBB1IP, PLCL2, RASAL1, ARHGAP20, PLEKHG1, DAPP1, GAB2, PLEKHG6, SNTB1, AGAP2, RASA4, PHLDA2, FGD3, FGD4, OBSCN, NGEF, CNKSR1, ARHGEF6, ARHGEF16, DGKK, PSD4, DGKH, FARP2, PRKD1, PLEKHA3, DOK2, PLEKHA6, PLEKHH2, OPHN1, GRB7, PHLDB2	677	223	6550	1.56189	0.892688	0.200047	9.26508
SMART	SM01411:SM01411	6	0.00365954	0.00732909	EPHA4, EPHB6, SCUBE3, EPHA8, SCUBE1, EPHA1	677	13	6550	4.4654	0.89624	0.186143	9.398
UP_SEQ_FEATURE	domain:Helix-loop-helix motif	15	0.00914885	0.000912966	EPAS1, MITF, MLXIPL, HES6, AHR, MXD4, ASCL2, ID2, ID1, ATOH8, ID3, BHLHE40, BHLHE41, TCF15, TWIST2	1032	62	11563	2.71076	0.901456	0.109402	1.60104
GOTERM_MF_DIRECT	GO:0042605~peptide antigen binding	7	0.00426946	0.00217089	H2-K1, TAP2, MAML1, TAP1, H2-D1, H2-T23, H2-T24	991	16	10722	4.73348	0.906207	0.155531	3.41142
UP_SEQ_FEATURE	propeptide:Removed in mature form	25	0.0152481	0.000979674	LY6C1, CPM, LYPD3, RTN4RL1, MFI2, NRN1, PSMB8, PSMB9, LY6A, RND2, DIRAS1, ISG15, CD59A, RAC3, CD177, CNTN2, DPEP3, TGFA, VNN1, ERAS, EFNA5, GFRA4, RASD1, NT5E, GBP2	1032	137	11563	2.04461	0.916812	0.11167	1.71707
GOTERM_BP_DIRECT	GO:0006508~proteolysis	50	0.0304962	0.000702573	BAP1, GGT1, FAM63B, OTUB2, MMP24, C1RA, USP18, DPEP3, HTRA3, ADAMTS20, CTSR, RHBDD1, MMP14, MMP12, USP29, USP28, ADAMTS9, ADAMTS8, CTSJ, CPE, CTSO, CPXM1, BACE1, ST14, CTSC, ADAMTS1, PRSS42, USP25, PRSS46, CPM, REN1, ADAMTS15, ENDOU, CTSA, NAALADL1, PRSS8, OTUD7A, PRSS12, STAMBP, CAPN6, AGBL2, KLK7, KLK8, HPN, UFSP1, ADAM23, FAM188B, SCRN1, PSMB8, PSMB9	1008	340	11126	1.62319	0.919226	0.164497	1.28216
PIR_SUPERFAMILY	PIRSF006060:amino acid transporter	4	0.00243969	0.0233888	SLC7A1, SLC7A8, SLC7A5, SLC7A7	123	7	1256	5.83508	0.920527	0.71809	23.3582
UP_KEYWORDS	Cleavage on pair of basic residues	19	0.0115885	0.006956	INSL3, ADAMTS20, ADAM23, ADAMTS15, TGFB3, MMP14, CDH3, CDH4, CDH5, MMP24, SCT, ADAMTS8, CILP2, CPE, ITGA8, LEFTY2, ADAMTS1, UPK2, BMP6	1157	107	12826	1.96847	0.923369	0.068868	9.16992
UP_SEQ_FEATURE	domain:Ig-like C2-type 3	14	0.00853893	0.00104735	IL1R2, ICAM1, NFASC, PTPRS, L1CAM, KIT, KDR, ALCAM, IL1RAP, CNTN2, PDGFRA, PDGFRB, CEACAM1, CSF1R	1032	56	11563	2.80111	0.929948	0.113826	1.83466
KEGG_PATHWAY	mmu04151:PI3K-Akt signaling pathway	36	0.0219572	0.0105502	PGF, OSMR, TNC, ITGB4, KIT, COL27A1, COL6A3, COL6A2, CREB3L1, NOS3, CREB3L3, THBS1, COL11A2, ANGPT2, CSF1R, FN1, IL2RB, SGK1, MET, ITGA1, PCK2, KITL, COL5A1, KDR, ATF4, LPAR5, PRLR, LPAR6, ITGA8, PDGFRA, PDGFRB, EFNA5, EPOR, JAK3, IL3RA, ITGA2B	453	241	4605	1.51851	0.933808	0.218731	12.9162
SMART	SM00423:PSI	9	0.00548931	0.00921114	SEMA5A, SEMA5B, PLXNC1, SEMA3G, PLXNA2, SEMA4F, MET, PLXDC2, PLXND1	677	30	6550	2.90251	0.942166	0.211415	11.6757
KEGG_PATHWAY	mmu04015:Rap1 signaling pathway	26	0.015858	0.0111954	ADCY1, RAP1GAP, GNAI1, PGF, KIT, APBB1IP, ACTG1, PFN2, RAC3, THBS1, ANGPT2, CSF1R, MAGI2, MET, KITL, KDR, FARP2, PRKD1, RASSF5, LPAR5, ID1, MAPK13, PDGFRA, PDGFRB, EFNA5, ITGA2B	453	159	4605	1.66229	0.943988	0.213516	13.6538
INTERPRO	IPR003663:Sugar/inositol transporter	6	0.00365954	0.00183261	SLC2A12, SLC2A7, SLC2A6, SLC2A5, SLC2A4, SLC2A3	1105	11	12069	5.95755	0.944775	0.113684	3.02012
GOTERM_CC_DIRECT	GO:0070382~exocytic vesicle	5	0.00304962	0.0057362	UNC13D, SYT9, DPYSL3, AKAP7, SYTL1	1073	9	11880	6.15098	0.946503	0.13015	7.96941
GOTERM_BP_DIRECT	GO:0007165~signal transduction	75	0.0457443	0.000828717	GNAZ, GPR162, GNA15, ACVRL1, PLXNA2, LEPR, PPARG, RGL3, RRAD, CXCR2, TLR5, ADORA1, GLI1, CCRL2, DIRAS1, KISS1R, ARHGAP20, S1PR1, ANK3, IL1RAP, TMEM102, CHRNA4, ERAS, PITPNC1, NOS3, HTR1D, ARHGAP8, CASKIN1, IL18RAP, MAGI2, PTGER4, PDE10A, PROKR1, NFAM1, ALK, GNAL, LPAR5, LPAR6, GRM6, SRGAP3, RIN2, OPHN1, GPR50, PDGFRB, RASD1, PLXNC1, RHPN1, GNAI1, ADCYAP1R1, RHPN2, APBB1IP, PLCL2, STAT6, RASAL1, T…	1008	569	11126	1.45488	0.948596	0.179523	1.51072
KEGG_PATHWAY	mmu05146:Amoebiasis	15	0.00914885	0.0115489	IL1R2, GNA15, ADCY1, TGFB3, SERPINB1A, COL5A1, SERPINB9C, GNAL, SERPINB9B, COL27A1, NOS2, COL11A2, SERPINB9F, SERPINB9D, FN1	453	74	4605	2.06059	0.948887	0.20447	14.0554
UP_SEQ_FEATURE	domain:TSP type-1 2	8	0.00487939	0.00120446	SEMA5A, SEMA5B, ADAMTS8, ADAMTS20, ADAMTS15, THSD4, ADAMTS1, THBS1	1032	20	11563	4.48178	0.952998	0.12448	2.10711
UP_SEQ_FEATURE	domain:TSP type-1 1	8	0.00487939	0.00120446	SEMA5A, SEMA5B, ADAMTS8, ADAMTS20, ADAMTS15, THSD4, ADAMTS1, THBS1	1032	20	11563	4.48178	0.952998	0.12448	2.10711
GOTERM_CC_DIRECT	GO:0030054~cell junction	63	0.0384252	0.00599277	PRX, XRCC4, CLDN7, OCLN, CLDN9, GABRB3, CADM1, GRIK3, FERMT1, SYT9, CXADR, HMCN2, ATCAY, DMXL2, ANK3, WNK4, SNTB1, TRPV4, CHRNA4, PAK1, CEACAM1, MAGI2, BSN, PTPRU, FBP2, FMN1, TNS4, DACT1, EVPL, CGN, OPHN1, DSP, LCP1, FAIM2, ITGB4, RIMS2, NRN1, APBB1IP, CDH5, RIMS4, GJC1, RIMS3, DMD, MARVELD3, PPL, OLFM2, LRFN2, DIXDC1, DLGAP1, DLGAP3, CRB3, RGS17, IGSF9B, SHANK1, SHANK2, RUFY3, KDR, EPHA4, PKP2,…	1073	500	11880	1.39504	0.953089	0.129831	8.31167
SMART	SM00093:SERPIN	7	0.00426946	0.0098862	SERPINB9C, SERPINB9B, SERPINB1A, SERPINI1, SERPINB9F, SERPINH1, SERPINB9D	677	19	6550	3.56449	0.953117	0.209739	12.4797
INTERPRO	IPR005828:General substrate transporter	8	0.00487939	0.00193916	SLC2A12, SLC2A7, SLC2A6, SLC2A5, SLC2A4, SLC2A3, SLC22A7, SLC22A21	1105	21	12069	4.16083	0.953342	0.115379	3.19305
INTERPRO	IPR016243:Tyrosine-protein kinase, CSF-1/PDGF receptor	5	0.00304962	0.00194433	PDGFRA, PDGFRB, KIT, CSF1R, KDR	1105	7	12069	7.80155	0.953722	0.111478	3.20142
UP_SEQ_FEATURE	sequence variant	35	0.0213473	0.00123429	APOBEC3, SEC1, NDN, REN1, LEPR, MITF, PAX6, H2-D1, TLR5, KIT, PAX3, TK1, SLC7A7, LY6A, CHRNA4, NOS2, CDH23, H2-K1, GSTA4, PFKP, SIRPA, KITL, PSMB8, AHR, PSMB9, CTSJ, CPE, SEMA4F, PARP14, MYO15, MAP3K14, DYNLT1B, MON1A, NFIB, CACNA1B	1032	222	11563	1.76647	0.956427	0.122392	2.15876
INTERPRO	IPR001849:Pleckstrin homology domain	36	0.0219572	0.00198736	FGD2, RALGPS1, ARHGEF26, FERMT1, ASAP3, APBB1IP, PLCL2, RASAL1, ARHGAP20, PLEKHG1, DAPP1, GAB2, PLEKHG6, SNTB1, AGAP2, RASA4, PHLDA2, FGD3, FGD4, OBSCN, NGEF, CNKSR1, ARHGEF6, ARHGEF16, DGKK, PSD4, DGKH, FARP2, PRKD1, PLEKHA3, DOK2, PLEKHA6, PLEKHH2, OPHN1, GRB7, PHLDB2	1105	231	12069	1.70216	0.956767	0.109827	3.27117
UP_KEYWORDS	Polymorphism	22	0.0134183	0.00856765	H2-K1, APOBEC3, SEC1, GSTA4, REN1, NDN, LEPR, TLR5, SIRPA, KITL, AHR, PSMB8, PSMB9, TK1, LY6A, CTSJ, PARP14, CHRNA4, NOS2, CACNA1B, MON1A, CDH23	1157	134	12826	1.82002	0.957848	0.0820208	11.1801
UP_KEYWORDS	Neurotransmitter transport	7	0.00426946	0.00879383	SLC6A9, CPLX2, SLC6A2, SLC6A12, RIMS2, RIMS4, RIMS3	1157	21	12826	3.69519	0.961243	0.0819817	11.4589
GOTERM_CC_DIRECT	GO:0045202~synapse	44	0.0268366	0.00646182	CPLX2, CADM1, GABRB3, GRIK3, SYT8, SYT9, RIMS2, NRN1, ADORA1, RIMS4, RIMS3, TNFRSF1A, ATCAY, DMXL2, ANK3, DMD, SNTB1, CHRNA4, MGLL, DLG3, OLFM2, PRSS12, CDH23, LRFN2, HCN2, DLGAP1, MAGI2, DLGAP3, MADD, CRYAB, EFNB1, BSN, RGS17, DGKI, SHANK1, IGSF9B, SHANK2, EPHA4, SLC6A9, DACT1, SEMA4F, CNTN2, OPHN1, FAIM2	1073	324	11880	1.50357	0.963107	0.13365	8.9343
GOTERM_MF_DIRECT	GO:0030215~semaphorin receptor binding	7	0.00426946	0.00309578	SEMA5A, SEMA5B, SEMA6A, SEMA6C, SEMA6D, SEMA3G, SEMA4F	991	17	10722	4.45504	0.965834	0.201565	4.83144
GOTERM_CC_DIRECT	GO:0031226~intrinsic component of plasma membrane	7	0.00426946	0.00682514	ALCAM, S1PR1, SLC24A1, PDGFRA, TGM2, PDGFRB, CD6	1073	20	11880	3.87512	0.969374	0.135191	9.41388
UP_KEYWORDS	Angiogenesis	17	0.0103687	0.00945645	ACVRL1, EPAS1, PGF, EFNB2, FZD5, ECM1, EPHA1, KDR, PRKD1, TSPAN12, WARS, CXCL17, S1PR1, PLXND1, ANGPT2, COL8A2, FN1	1157	94	12826	2.00484	0.969698	0.0857532	12.271
INTERPRO	IPR000884:Thrombospondin, type 1 repeat	10	0.00609923	0.00221946	SEMA5A, SEMA5B, ADAMTS9, CILP2, ADAMTS8, ADAMTS20, ADAMTS15, THSD4, ADAMTS1, THBS1	1105	33	12069	3.30975	0.970056	0.117769	3.64659
UP_KEYWORDS	EGF-like domain	20	0.0121985	0.00990434	VASN, SCUBE3, ADAM23, SCUBE1, SUSD1, TNC, CELSR3, DLK2, NID2, JAG1, MUC4, HMCN2, C1RA, NAGPA, THBD, ACAN, TGFA, THBS1, MEGF6, VLDLR	1157	119	12826	1.86312	0.974344	0.0875064	12.816
GOTERM_BP_DIRECT	GO:0007263~nitric oxide mediated signal transduction	6	0.00365954	0.00102859	MT2, MT1, NOS3, PDX1, NOS2, RASD1	1008	10	11126	6.62262	0.974884	0.205677	1.87183
PIR_SUPERFAMILY	PIRSF001191:matrix metalloproteinase, stromelysin type	4	0.00243969	0.034806	MMP28, MMP14, MMP12, MMP24	123	8	1256	5.10569	0.977418	0.717347	32.848
PIR_SUPERFAMILY	PIRSF000666:tyrosine-protein kinase, ephrin receptor type	4	0.00243969	0.034806	EPHA4, EPHB6, EPHA8, EPHA1	123	8	1256	5.10569	0.977418	0.717347	32.848
GOTERM_BP_DIRECT	GO:0006811~ion transport	48	0.0292763	0.00109089	LRRC8E, SLC39A14, SLC38A4, ATP1B1, KCNC4, KCNAB3, GABRB3, LRRC8B, SLC20A2, TRPV2, GRIK3, LRRC8D, SFXN5, KCNS3, SLC23A1, SLC24A3, WNK4, SLC39A8, CHRNA4, TRPV4, SLCO3A1, SLCO5A1, KCNQ2, SCN5A, SCNN1A, NIPAL4, HCN2, TMC8, SLC8A2, SLCO4A1, SLC22A7, SLC12A5, MFI2, SLC22A21, CNGA3, SLC34A2, SLC26A6, BSPRY, ATP6V0E2, P2RX3, RYR1, RYR2, ATP6V0A4, CACNA1C, STEAP2, KCNH3, ADD2, CACNA1B	1008	329	11126	1.61036	0.97991	0.20535	1.98414
UP_SEQ_FEATURE	DNA-binding region:Homeobox	18	0.0109786	0.00154238	EVX1, HOXA11, NKX2-9, PAX6, HOXB13, HOXD13, SIX5, VAX2, PDX1, PAX3, DLX3, HOXC13, LHX2, POU2F3, HOXA7, HOXA10, GBX1, UNCX	1032	87	11563	2.31816	0.98008	0.144989	2.6907
GOTERM_CC_DIRECT	GO:0030018~Z disc	17	0.0103687	0.00776365	OBSCN, CRYAB, SYNC, FBP2, KRT19, TRIM54, ANK3, DMD, KRT8, FHOD3, RYR1, RYR2, FBXO32, PAK1, CACNA1C, SCN5A, JPH1	1073	92	11880	2.04587	0.981072	0.146735	10.6418
GOTERM_CC_DIRECT	GO:0019897~extrinsic component of plasma membrane	8	0.00487939	0.00847659	PRSS8, EPN3, OLR1, AAK1, SCUBE1, PPL, ST14, SYTL1	1073	27	11880	3.28052	0.986872	0.153507	11.5643
INTERPRO	IPR011511:Variant SH3	12	0.00731908	0.0028544	CASKIN1, GRAP, MPP2, MYO15, BZRAP1, SRGAP3, SH3RF2, SHANK1, SH3TC2, TJP3, SHANK2, DOCK3	1105	47	12069	2.78864	0.98904	0.144132	4.66656
INTERPRO	IPR027231:Semaphorin	7	0.00426946	0.0029548	SEMA5A, SEMA5B, SEMA6A, SEMA6C, SEMA6D, SEMA3G, SEMA4F	1105	17	12069	4.49736	0.990652	0.144228	4.82692
UP_KEYWORDS	Metalloprotease	15	0.00914885	0.0128549	STAMBP, AGBL2, CPM, ADAMTS20, ADAMTS15, MMP28, NAALADL1, MMP14, MMP12, MMP24, ADAMTS8, CPE, CPXM1, DPEP3, ADAMTS1	1157	81	12826	2.05288	0.991445	0.109639	16.3286
GOTERM_MF_DIRECT	GO:0022891~substrate-specific transmembrane transporter activity	6	0.00365954	0.00454912	SLC2A12, SLC2A7, SLC2A6, SLC2A5, SLC2A4, SLC2A3	991	13	10722	4.99356	0.993024	0.266796	7.02332
SMART	SM00250:PLEC	4	0.00243969	0.0172378	EVPL, MACF1, PPL, DSP	677	6	6550	6.45002	0.995278	0.317872	20.8076
GOTERM_CC_DIRECT	GO:0031012~extracellular matrix	29	0.0176878	0.0105152	LGALS3, CRIP2, ADAMTS20, TNC, ADAMTS15, VIM, TGFB3, PFKP, NID2, MMP14, EMILIN3, TIMP3, ECM1, MMP12, COL5A1, MMP24, ACTG1, ADAMTS8, SFRP1, LEFTY2, COL6A3, THSD4, COL6A2, TGM2, DSP, ADAMTS1, THBS1, COL8A2, FN1	1073	197	11880	1.62985	0.995395	0.18068	14.1533
GOTERM_CC_DIRECT	GO:0005923~bicellular tight junction	16	0.00975878	0.0105593	CLDN7, MAGI2, OCLN, CLDN9, ADCYAP1R1, CRB3, CXADR, FZD5, CDH5, ANK3, CGN, MARVELD3, WNK4, AMOT, DLG3, TJP3	1073	87	11880	2.03619	0.995498	0.175496	14.2084
INTERPRO	IPR005829:Sugar transporter, conserved site	8	0.00487939	0.00347618	SLC2A12, SLC2A7, SLC2A6, SLC2A5, SLC2A4, SLC2A3, SLC22A21, SLC17A9	1105	23	12069	3.79902	0.995907	0.16253	5.65555
GOTERM_MF_DIRECT	GO:0008236~serine-type peptidase activity	13	0.007929	0.00511754	KLK7, HPN, KLK8, ENDOU, RHBDD1, PRSS8, GZMM, C1RA, ST14, PRSS42, HTRA3, PRSS12, PRSS46	991	57	10722	2.46758	0.996255	0.280116	7.86765
INTERPRO	IPR001314:Peptidase S1A, chymotrypsin-type	9	0.00548931	0.00358048	GZMM, PRSS8, KLK7, C1RA, HPN, KLK8, PRSS42, PRSS12, PRSS46	1105	29	12069	3.38964	0.99653	0.162213	5.8205
GOTERM_CC_DIRECT	GO:0070062~extracellular exosome	209	0.127474	0.01111	ATP1B1, ADCY1, CADM4, CADM1, GGT1, ACTG1, C1RA, APP, PLS1, VNN1, H2AFX, GATM, CRYAB, EFNB1, LIFR, PTPRS, CD40, PIK3IP1, SIRPA, CD38, KRT19, CD37, KRT18, TACSTD2, ST14, KRT14, RYR1, PDGFRB, RYR2, TUBA4A, WFDC2, ITGA2B, RBP4, GNAI1, ALDOC, ACP5, RIMS2, SERPINH1, SEMA5A, ALCAM, PFN2, TPI1, RAC3, UBASH3A, TUBB4A, MGAT4A, GPR155, LGALS3, UFSP1, AKR1E1, SERPINI1, ECM1, SFRP1, MARCKS, SYTL1, PDZK1, CRYM…	1073	2000	11880	1.157	0.996609	0.178062	14.8952
INTERPRO	IPR002957:Keratin, type I	5	0.00304962	0.0036078	KRT19, KRT18, KRT14, KRT20, NEFM	1105	8	12069	6.82636	0.996677	0.158812	5.86367
INTERPRO	IPR001824:Tyrosine-protein kinase, receptor class III, conserved site	5	0.00304962	0.0036078	PDGFRA, PDGFRB, KIT, CSF1R, KDR	1105	8	12069	6.82636	0.996677	0.158812	5.86367
GOTERM_BP_DIRECT	GO:0045766~positive regulation of angiogenesis	17	0.0103687	0.00165298	ACVRL1, LGALS3, PGF, CXCR2, ECM1, EPHA1, ANXA3, KDR, SEMA5A, PRKD1, TNFRSF1A, GATA2, ETS1, HIPK2, NOS3, THBS1, ANGPT2	1008	79	11126	2.3752	0.997322	0.280379	2.99189
KEGG_PATHWAY	mmu00603:Glycosphingolipid biosynthesis - globo series	5	0.00304962	0.0239239	SEC1, A4GALT, GBGT1, HEXA, FUT1	453	12	4605	4.23565	0.997968	0.357753	27.0755
GOTERM_MF_DIRECT	GO:0046982~protein heterodimerization activity	51	0.0311061	0.00575547	PGF, HEXA, H2-D1, TGFB3, DLK2, PDX1, ADORA1, CHRNA4, HIST3H2A, H2AFX, CREB3L3, BHLHE41, H2-K1, SCUBE1, ZHX1, MLXIPL, ZHX2, LIFR, SLC3A1, HES6, DDIT3, AHR, HIST2H2BE, JUN, TBX18, ADD2, RBP4, TAF9B, SOX4, NR3C1, RRAGD, NRN1, RIMS2, TAP2, TAP1, NEFH, BHLHE40, NEFL, NEFM, PDK2, EPAS1, CEBPG, MET, AXL, MID1, ABCG4, ABCG1, MID2, CYBA, ATF4, BMP6	991	378	10722	1.45976	0.998137	0.294756	8.80666
UP_KEYWORDS	SH3 domain	26	0.015858	0.0170913	GRAP, SH3YL1, PRMT2, MACF1, PTK6, MAP3K9, DLG3, UBASH3A, SH3TC2, CASKIN1, NGEF, OBSCN, NCF1, MPP2, ARHGEF6, BZRAP1, ARHGEF16, SHANK1, SHANK2, DOCK3, MYO15, SRGAP3, SH3RF2, TNK1, PPP1R13B, TJP3	1157	178	12826	1.61924	0.998243	0.140193	21.1429
KEGG_PATHWAY	mmu05412:Arrhythmogenic right ventricular cardiomyopathy (ARVC)	10	0.00609923	0.0245574	ACTG1, PKP2, ITGA8, DMD, ITGA1, ITGB4, RYR2, DSP, CACNA1C, ITGA2B	453	44	4605	2.31036	0.99828	0.345802	27.6903
SMART	SM00210:TSPN	5	0.00304962	0.02053	COL27A1, COL22A1, THBS1, COL11A2, COL5A1	677	11	6550	4.39774	0.99832	0.346842	24.2938
UP_SEQ_FEATURE	domain:TSP type-1 3	7	0.00426946	0.00259183	SEMA5A, SEMA5B, ADAMTS20, ADAMTS15, THSD4, ADAMTS1, THBS1	1032	17	11563	4.6136	0.998618	0.223712	4.48229
UP_SEQ_FEATURE	short sequence motif:Box 1 motif	7	0.00426946	0.00259183	IL2RB, PRLR, OSMR, LEPR, LIFR, EPOR, IL3RA	1032	17	11563	4.6136	0.998618	0.223712	4.48229
GOTERM_BP_DIRECT	GO:0002485~antigen processing and presentation of endogenous peptide antigen via MHC class I via ER pathway, TAP-dependent	5	0.00304962	0.00186739	H2-K1, ABCB1B, TAP2, TAP1, H2-D1	1008	7	11126	7.88407	0.998759	0.29685	3.37372
INTERPRO	IPR011641:Tyrosine-protein kinase ephrin type A/B receptor-like	6	0.00365954	0.00437056	EPHA4, EPHB6, SCUBE3, EPHA8, SCUBE1, EPHA1	1105	13	12069	5.041	0.999008	0.184064	7.06124
GOTERM_BP_DIRECT	GO:0007156~homophilic cell adhesion via plasma membrane adhesion molecules	13	0.007929	0.0019367	CDH22, CADM4, CADM1, CLSTN3, CELSR3, L1CAM, IGSF9B, CDH3, CD200, CDH4, CEACAM1, CDH5, CDH23	1008	52	11126	2.75942	0.999032	0.293198	3.49684
UP_SEQ_FEATURE	repeat:5	12	0.00731908	0.00278452	PRX, FMN2, EPN3, APC2, LGALS3, MFSD7C, BSN, NEFH, ALMS1, HIVEP2, SRGN, MUC4	1032	48	11563	2.80111	0.999153	0.230494	4.80784
GOTERM_MF_DIRECT	GO:0004180~carboxypeptidase activity	6	0.00365954	0.00654497	AGBL2, CPM, CPE, CPXM1, CTSA, NAALADL1	991	14	10722	4.63687	0.999216	0.313647	9.95635
INTERPRO	IPR003006:Immunoglobulin/major histocompatibility complex, conserved site	8	0.00487939	0.00452617	H2-K1, ACAN, H2-D1, H2-T23, H2-T24, H2-DMA, SIRPA, TAPBP	1105	24	12069	3.64072	0.999225	0.185074	7.30378
UP_SEQ_FEATURE	domain:Ig-like C2-type 5	9	0.00548931	0.00305043	ICAM1, PDGFRA, NFASC, CNTN2, PDGFRB, L1CAM, KIT, CSF1R, KDR	1032	29	11563	3.47725	0.99957	0.241804	5.25538
GOTERM_BP_DIRECT	GO:0009612~response to mechanical stimulus	12	0.00731908	0.00218261	ETS1, JUN, P2RX3, TNC, PPARG, ASNS, IGFBP2, THBS1, PSPH, MMP14, ANGPT2, CITED2	1008	46	11126	2.8794	0.999599	0.310984	3.93249
KEGG_PATHWAY	mmu05332:Graft-versus-host disease	5	0.00304962	0.0319418	H2-K1, H2-D1, H2-T23, H2-T24, H2-DMA	453	13	4605	3.90983	0.999754	0.405128	34.5118
UP_SEQ_FEATURE	domain:COS	5	0.00304962	0.00328163	FSD1, TRIM46, TRIM54, MID1, MID2	1032	8	11563	7.00279	0.999761	0.249907	5.64288
UP_SEQ_FEATURE	DNA-binding region:Basic motif	19	0.0115885	0.00331599	BATF3, EPAS1, CEBPG, MITF, MLXIPL, HES6, AHR, MXD4, ASCL2, ATF5, ATF4, JUN, CREB3L1, CREB3L3, ATOH8, BHLHE40, BHLHE41, TCF15, TWIST2	1032	101	11563	2.10777	0.999781	0.244887	5.70034
KEGG_PATHWAY	mmu04940:Type I diabetes mellitus	6	0.00365954	0.0324859	H2-K1, CPE, H2-D1, H2-T23, H2-T24, H2-DMA	453	19	4605	3.21018	0.999787	0.391843	34.9901
KEGG_PATHWAY	mmu00330:Arginine and proline metabolism	9	0.00548931	0.0326431	PYCR1, ALDH18A1, GATM, P4HA2, CKMT1, NOS3, GAMT, NOS2, SMS	453	39	4605	2.3459	0.999796	0.376249	35.1277
GOTERM_BP_DIRECT	GO:0006954~inflammatory response	26	0.015858	0.00238549	ELF3, CRHBP, PPARG, IL17RE, TLR5, KIT, CCRL2, TNFRSF1A, IL1RAP, VNN1, NOS2, THBS1, CSF1R, LIPA, OLR1, NCF1, CHST2, ANXA1, AXL, CD40, ECM1, AIM2, PRKD1, CYBA, TNFRSF9, BMP6	1008	152	11126	1.88803	0.999807	0.322027	4.29049
INTERPRO	IPR000215:Serpin family	7	0.00426946	0.00552627	SERPINB9C, SERPINB9B, SERPINB1A, SERPINI1, SERPINB9F, SERPINH1, SERPINB9D	1105	19	12069	4.02396	0.999842	0.215776	8.84849
INTERPRO	IPR023796:Serpin domain	7	0.00426946	0.00552627	SERPINB9C, SERPINB9B, SERPINB1A, SERPINI1, SERPINB9F, SERPINH1, SERPINB9D	1105	19	12069	4.02396	0.999842	0.215776	8.84849
INTERPRO	IPR023795:Protease inhibitor I4, serpin, conserved site	7	0.00426946	0.00552627	SERPINB9C, SERPINB9B, SERPINB1A, SERPINI1, SERPINB9F, SERPINH1, SERPINB9D	1105	19	12069	4.02396	0.999842	0.215776	8.84849
INTERPRO	IPR003597:Immunoglobulin C1-set	7	0.00426946	0.00552627	H2-K1, H2-D1, H2-T23, H2-T24, H2-DMA, SIRPA, TAPBP	1105	19	12069	4.02396	0.999842	0.215776	8.84849
GOTERM_CC_DIRECT	GO:0043204~perikaryon	15	0.00914885	0.0175467	CYP11A1, CRYAB, CRHBP, GRIK3, SLC12A5, ITGA1, PDE10A, TTLL7, CNGA3, RUFY3, EPHA4, CPE, ITGA8, NEFH, NEFM	1073	84	11880	1.9771	0.999878	0.259442	22.5519
INTERPRO	IPR017452:GPCR, rhodopsin-like, 7TM	15	0.00914885	0.00580669	GPR162, GPR157, PTGER4, PROKR1, CXCR2, ADORA1, GPR153, CCRL2, KISS1R, S1PR1, LPAR5, LPAR6, GPR50, ADRA2B, HTR1D	1105	73	12069	2.24428	0.999899	0.220051	9.27725
GOTERM_MF_DIRECT	GO:0004252~serine-type endopeptidase activity	14	0.00853893	0.00851911	KLK7, HPN, KLK8, RHBDD1, MMP12, PRSS8, GZMM, C1RA, ST14, CTSC, PRSS42, HTRA3, PRSS12, PRSS46	991	68	10722	2.22752	0.99991	0.3724	12.772
KEGG_PATHWAY	mmu00561:Glycerolipid metabolism	10	0.00609923	0.0363482	MOGAT2, AKR1B10, LIPG, MGLL, LCLAT1, DGKK, DGKH, DGKI, PNPLA3, LPIN3	453	47	4605	2.16289	0.999924	0.392781	38.2939
GOTERM_MF_DIRECT	GO:0046983~protein dimerization activity	21	0.0128084	0.00870552	EPAS1, MITF, MLXIPL, NR3C1, HES6, KIF9, AHR, MXD4, ASCL2, ID2, HPSE, ID1, POU2F3, NUP210, ATOH8, ID3, BHLHE40, BHLHE41, CEACAM1, TCF15, TWIST2	991	123	10722	1.84721	0.999927	0.364549	13.0336
INTERPRO	IPR013032:EGF-like, conserved site	20	0.0121985	0.00601755	VASN, SCUBE3, ADAM23, SCUBE1, SUSD1, TNC, ITGB4, CELSR3, DLK2, NID2, JAG1, HMCN2, C1RA, NAGPA, THBD, ACAN, TGFA, THBS1, MEGF6, VLDLR	1105	112	12069	1.95039	0.999927	0.221822	9.59841
SMART	SM00228:PDZ	21	0.0128084	0.0304767	PRX, CNKSR1, MAGI2, MPP2, RHPN1, RHPN2, PTPN4, PDLIM4, GIPC3, PDZRN3, SHANK1, RIMS2, SHANK2, LNX1, MAST1, SNTB1, DLG3, HTRA3, TJP3, PDZK1, PDZD4	677	125	6550	1.62541	0.999928	0.44888	33.9829
INTERPRO	IPR017903:COS domain	5	0.00304962	0.00602662	FSD1, TRIM46, TRIM54, MID1, MID2	1105	9	12069	6.06787	0.999928	0.217091	9.6122
GOTERM_MF_DIRECT	GO:0015297~antiporter activity	9	0.00548931	0.00880861	SLC26A6, SLC8A2, SLC7A3, SLC24A3, SLC7A1, SLC7A8, SLC7A4, SLC7A5, SLC7A7	991	33	10722	2.95074	0.999935	0.354647	13.1779
UP_KEYWORDS	LIM domain	11	0.00670916	0.0265321	CRIP1, LMO1, CRIP2, LHX2, FHL1, PRICKLE3, ABLIM3, PRICKLE2, PDLIM4, MICAL3, ZFP185	1157	56	12826	2.17752	0.99995	0.205571	30.9621
SMART	SM00407:IGc1	6	0.00365954	0.0316272	H2-K1, H2-D1, H2-T23, H2-T24, H2-DMA, SIRPA	677	18	6550	3.22501	0.99995	0.44137	35.0262
GOTERM_BP_DIRECT	GO:0003333~amino acid transmembrane transport	7	0.00426946	0.00279716	SLC38A4, SLC7A3, SLC7A1, SLC7A8, SLC7A4, SLC7A5, SLC7A7	1008	17	11126	4.54493	0.999956	0.353378	5.01307
GOTERM_MF_DIRECT	GO:0004867~serine-type endopeptidase inhibitor activity	10	0.00609923	0.00933466	SERPINB9C, SERPINB9B, APP, COL6A3, SERPINB1A, SERPINI1, SERPINB9F, SERPINH1, WFDC2, SERPINB9D	991	40	10722	2.70484	0.999963	0.358568	13.9109
UP_KEYWORDS	Tyrosine-protein kinase	15	0.00914885	0.0275988	MET, AXL, KIT, ALK, EPHA1, KDR, EPHA4, EPHA8, PTK6, PDGFRA, PDGFRB, TNK1, JAK3, MERTK, CSF1R	1157	89	12826	1.86835	0.999966	0.208695	31.9973
GOTERM_BP_DIRECT	GO:0007166~cell surface receptor signaling pathway	21	0.0128084	0.00291838	VASN, GPR157, OSMR, PLXNA2, ADCYAP1R1, ANXA1, CELSR3, PROKR1, FZD3, CXCR2, L1CAM, FZD5, EPHA1, FZD7, TSPAN12, TNFRSF1A, SEMA6A, CD37, TSPAN33, CD82, GPR50	1008	114	11126	2.03326	0.999971	0.353357	5.22485
GOTERM_BP_DIRECT	GO:0001755~neural crest cell migration	11	0.00670916	0.00293316	SEMA5A, SEMA5B, SEMA6A, SEMA6C, SEMA6D, SEMA3G, SEMA4F, EFNB1, PAX6, PAX3, KITL	1008	41	11126	2.96133	0.999973	0.343377	5.25065
GOTERM_BP_DIRECT	GO:0060070~canonical Wnt signaling pathway	15	0.00914885	0.00309651	DIXDC1, SOX4, FZD3, PTPRU, CDH3, FZD5, FZD7, GLI1, T, DACT1, SFRP1, RYR2, BCL9L, WNT7A, KLF4	1008	69	11126	2.3995	0.999985	0.347554	5.53525
GOTERM_BP_DIRECT	GO:0060395~SMAD protein signal transduction	12	0.00731908	0.00312811	T, MAGI2, JUN, HEXA, VIM, LEFTY2, HIPK2, TGFB3, ATOH8, CITED1, LEFTY1, BMP6	1008	48	11126	2.75942	0.999987	0.339933	5.59022
KEGG_PATHWAY	mmu02010:ABC transporters	7	0.00426946	0.0430656	ABCB1B, TAP2, TAP1, ABCA1, ABCA3, ABCG4, ABCG1	453	27	4605	2.63552	0.999987	0.430765	43.6733
GOTERM_BP_DIRECT	GO:0042060~wound healing	14	0.00853893	0.00318021	TNC, TGFB3, CDH3, SDC4, MMP12, MACF1, HPSE, POU2F3, PDGFRA, DSP, TGFA, PDGFRB, PAK1, FN1	1008	62	11126	2.49238	0.999989	0.334529	5.68078
GOTERM_CC_DIRECT	GO:0045211~postsynaptic membrane	19	0.0115885	0.0234873	DLGAP1, GABRB3, DLGAP3, CLSTN3, GRIK3, MET, SHANK1, IGSF9B, ADORA1, SHANK2, EPHA4, SEMA4F, ANK3, DMD, GRM6, CHRNA4, DLG3, FAIM2, LRFN2	1073	121	11880	1.73854	0.999994	0.32311	29.0447
GOTERM_MF_DIRECT	GO:0000978~RNA polymerase II core promoter proximal region sequence-specific DNA binding	37	0.0225672	0.0111267	BMI1, GLIS3, ELF1, ELF3, NDN, TBX20, MITF, PAX6, HOXD13, NR3C1, PDX1, ZIC3, GLI1, T, LHX2, POU2F3, HOXA7, HOXA10, NFATC2, BHLHE41, BATF3, SSBP4, SSBP2, FOXJ2, FOXJ1, CEBPG, NKX2-9, MLXIPL, SIX5, NR4A3, DDIT3, ASCL2, ATF4, JUN, PRDM1, TBX18, NFIB	991	264	10722	1.51635	0.999995	0.398124	16.3647
UP_KEYWORDS	Stress response	12	0.00731908	0.0327677	FMN2, PYCR1, SGK1, HSPA2, MAPK13, MAP3K9, HSPB8, HSPA4L, HSPA1A, HSPA1B, SERPINH1, DDIT3	1157	66	12826	2.01556	0.999995	0.238493	36.8123
UP_KEYWORDS	Sodium	11	0.00670916	0.0330677	HCN2, SLC38A4, ATP1B1, SLC23A1, SLC8A2, SLC24A3, SLC6A2, SLC20A2, SCNN1A, SCN5A, SLC34A2	1157	58	12826	2.10243	0.999996	0.235868	37.0818
SMART	SM00454:SAM	12	0.00731908	0.0409044	CASKIN1, CNKSR1, EPHA4, EPHB6, SAMD5, L3MBTL3, EPHA8, DGKH, BICC1, SHANK1, SHANK2, EPHA1	677	60	6550	1.93501	0.999997	0.51063	42.8985
SMART	SM00294:4.1m	4	0.00243969	0.0412447	CADM4, CADM1, SDC4, SDC3	677	8	6550	4.83752	0.999998	0.494788	43.1697
SMART	SM00615:EPH_lbd	4	0.00243969	0.0412447	EPHA4, EPHB6, EPHA8, EPHA1	677	8	6550	4.83752	0.999998	0.494788	43.1697
SMART	SM00134:LU	4	0.00243969	0.0412447	LY6A, LY6C1, LYPD3, CD59A	677	8	6550	4.83752	0.999998	0.494788	43.1697
UP_KEYWORDS	Heparin-binding	9	0.00548931	0.0360175	APP, ADAMTS8, LIPG, COL25A1, ADAMTS1, THBS1, GREM2, COL5A1, FN1	1157	43	12826	2.32023	0.999999	0.249649	39.6756
GOTERM_MF_DIRECT	GO:0015171~amino acid transmembrane transporter activity	7	0.00426946	0.0125177	SLC38A4, SLC7A3, SLC7A1, SLC7A8, SLC7A4, SLC7A5, SLC7A7	991	22	10722	3.44253	0.999999	0.422307	18.224
SMART	SM00112:CA	7	0.00426946	0.0451471	CDH22, CLSTN3, CELSR3, CDH3, CDH4, CDH5, CDH23	677	26	6550	2.60482	0.999999	0.509068	46.196
GOTERM_BP_DIRECT	GO:0007186~G-protein coupled receptor signaling pathway	30	0.0182977	0.00413654	GNAZ, GPR162, GNA15, GNAI1, ADCYAP1R1, CXCR2, ABCA1, ADORA1, CCRL2, KISS1R, S1PR1, TGM2, ADRA2B, HTR1D, ENTPD2, GPR157, PTGER4, CELSR3, PROKR1, FZD3, RGS17, FZD5, GPR179, FZD7, GPR153, GNAL, LPAR5, LPAR6, GRM6, GPR50	1008	192	11126	1.72464	1	0.400529	7.32849
GOTERM_CC_DIRECT	GO:0005883~neurofilament	4	0.00243969	0.0290382	NEFH, SHANK2, NEFL, NEFM	1073	8	11880	5.53588	1	0.374202	34.6504
GOTERM_CC_DIRECT	GO:0042101~T cell receptor complex	4	0.00243969	0.0290382	ALCAM, CD6, APBB1IP, CEACAM1	1073	8	11880	5.53588	1	0.374202	34.6504
SMART	SM00034:CLECT	6	0.00365954	0.0482166	MRC1, THBD, OLR1, KLRG2, ACAN, CD302	677	20	6550	2.90251	1	0.515576	48.4708
GOTERM_BP_DIRECT	GO:0001938~positive regulation of endothelial cell proliferation	11	0.00670916	0.00425119	PRKD1, SEMA5A, CYBA, PPP1R16B, ACVRL1, NRARP, PGF, JUN, ECM1, BMP6, KDR	1008	43	11126	2.8236	1	0.398537	7.52417
GOTERM_MF_DIRECT	GO:0005355~glucose transmembrane transporter activity	5	0.00304962	0.0140466	SLC2A12, SLC2A6, SLC2A5, SLC2A4, SLC2A3	991	11	10722	4.9179	1	0.447062	20.223
KEGG_PATHWAY	mmu05322:Systemic lupus erythematosus	7	0.00426946	0.0585685	C1RA, TROVE2, HIST2H2BE, H2AFX, HIST3H2A, CD40, H2-DMA	453	29	4605	2.45376	1	0.520849	54.4781
KEGG_PATHWAY	mmu04913:Ovarian steroidogenesis	7	0.00426946	0.0585685	ADCY1, STAR, CYP11A1, HSD3B6, HSD17B2, HSD17B1, BMP6	453	29	4605	2.45376	1	0.520849	54.4781
UP_KEYWORDS	Signal-anchor	35	0.0213473	0.0412435	GAL3ST3, ATP1B1, SEC1, HSD17B2, GBGT1, TFR2, SYT8, GGT1, NAALADL1, B3GNT5, ST3GAL5, B4GALNT3, CREB3L1, FUT1, B3GNT3, B4GALNT4, CREB3L3, AI464131, ACSL6, MGAT4A, HPN, A4GALT, OLR1, SLC3A2, CHST2, COL25A1, SLC3A1, PNPLA3, CD38, TNFSF11, TFRC, ASPHD2, ST14, PEX26, STBD1	1157	278	12826	1.39566	1	0.275958	44.0289
GOTERM_MF_DIRECT	GO:0005544~calcium-dependent phospholipid binding	8	0.00487939	0.0143118	ANXA8, ANXA1, SYT8, C2CD4C, SYT9, SYTL1, ANXA4, ANXA3	991	29	10722	2.98465	1	0.440892	20.5649
UP_SEQ_FEATURE	domain:Peptidase S1	7	0.00426946	0.00643725	PRSS8, C1RA, HPN, KLK8, ST14, PRSS42, PRSS12	1032	20	11563	3.92156	1	0.410523	10.7847
GOTERM_BP_DIRECT	GO:0019221~cytokine-mediated signaling pathway	15	0.00914885	0.00464218	STAT6, TNFRSF1A, IL2RB, PODN, TNFSF11, RTN4RL1, IL1RAP, SOCS1, LIFR, IL17RE, KIT, JAK3, GREM2, IL3RA, CSF1R	1008	72	11126	2.29952	1	0.415702	8.18862
KEGG_PATHWAY	mmu05414:Dilated cardiomyopathy	10	0.00609923	0.0636699	ACTG1, ADCY1, ITGA8, DMD, ITGA1, TGFB3, ITGB4, RYR2, CACNA1C, ITGA2B	453	52	4605	1.95492	1	0.534909	57.5917
KEGG_PATHWAY	mmu00140:Steroid hormone biosynthesis	5	0.00304962	0.0643383	CYP11A1, HSD3B6, HSD17B2, HSD17B1, CYP21A1	453	16	4605	3.17674	1	0.522976	57.9848
SMART	SM00179:EGF_CA	14	0.00853893	0.0547073	HMCN2, C1RA, THBD, SCUBE3, SCUBE1, SUSD1, ACAN, CELSR3, DLK2, NID2, JAG1, THBS1, MEGF6, VLDLR	677	78	6550	1.73655	1	0.545087	52.9909
UP_KEYWORDS	Calmodulin-binding	17	0.0103687	0.0462652	OBSCN, ADCY1, SLC8A2, PHKA1, RRAD, CAMKK1, SNTB1, RYR1, IQCG, TRPV4, RYR2, MARCKS, NOS3, MYH14, NOS2, SCN5A, ADD2	1157	113	12826	1.66774	1	0.299356	47.9358
INTERPRO	IPR001478:PDZ domain	21	0.0128084	0.0112003	PRX, CNKSR1, MAGI2, MPP2, RHPN1, RHPN2, PTPN4, PDLIM4, GIPC3, PDZRN3, SHANK1, RIMS2, SHANK2, LNX1, MAST1, SNTB1, DLG3, HTRA3, TJP3, PDZK1, PDZD4	1105	127	12069	1.80603	1	0.358937	17.1641
KEGG_PATHWAY	mmu04380:Osteoclast differentiation	15	0.00914885	0.06792	CYBA, TNFRSF1A, TNFSF11, GAB2, NCF1, MAPK13, JUN, PPARG, MITF, SOCS1, ACP5, NFATC2, MAP3K14, SIRPA, CSF1R	453	93	4605	1.63961	1	0.527755	60.0343
GOTERM_BP_DIRECT	GO:0002376~immune system process	32	0.0195176	0.00506328	APOBEC3, CADM1, IFITM2, OAS3, H2-D1, TLR5, ISG20, ALCAM, RNF125, C1RA, TMEM173, TAP2, TAP1, IL1RAP, CSF1R, H2-K1, IRGM1, LGALS3, OLR1, ANXA1, AXL, CD40, AIM2, AHR, PSMB8, PSMB9, PRKD1, ETS1, H2-T23, JAK3, PRDM1, H2-DMA	1008	212	11126	1.66607	1	0.433282	8.8992
GOTERM_BP_DIRECT	GO:0043627~response to estrogen	12	0.00731908	0.00513541	KRT19, STAR, PPARG, TGFB3, PDGFRB, IGFBP2, MMP14, CITED4, WNT7A, CITED1, CITED2, SLC34A2	1008	51	11126	2.59711	1	0.427962	9.02039
GOTERM_BP_DIRECT	GO:0042391~regulation of membrane potential	12	0.00731908	0.00513541	HCN2, SLC26A6, GRIK3, SLC1A6, DMD, CACNA1G, CHRNA4, RIMS2, CNGA3, KCNH3, RIMS4, RIMS3	1008	51	11126	2.59711	1	0.427962	9.02039
GOTERM_CC_DIRECT	GO:0046658~anchored component of plasma membrane	6	0.00365954	0.035575	PRSS8, RTN4RL1, MFI2, EFNA5, PRSS42, NRN1	1073	21	11880	3.16336	1	0.428057	40.7223
SMART	SM00132:LIM	11	0.00670916	0.0581438	CRIP1, LMO1, CRIP2, LHX2, FHL1, PRICKLE3, ABLIM3, PRICKLE2, PDLIM4, MICAL3, ZFP185	677	56	6550	1.90045	1	0.551647	55.2327
GOTERM_CC_DIRECT	GO:0016328~lateral plasma membrane	9	0.00548931	0.0362151	CLDN7, OCLN, TACSTD2, ANK3, PRICKLE2, ANXA1, FZD3, AKAP7, CEACAM1	1073	43	11880	2.31735	1	0.424331	41.2878
GOTERM_BP_DIRECT	GO:0006952~defense response	7	0.00426946	0.00524066	LSP1, TNFRSF1A, IRGM1, IGTP, TAP1, H2-D1, TAPBP	1008	19	11126	4.06652	1	0.424929	9.19696
GOTERM_MF_DIRECT	GO:0003705~transcription factor activity, RNA polymerase II distal enhancer sequence-specific binding	10	0.00609923	0.0173681	T, JUN, SOX11, MITF, PDX1, PAX3, BHLHE40, BHLHE41, AHR, GLI1	991	44	10722	2.45895	1	0.494107	24.4087
UP_KEYWORDS	Aminoacyl-tRNA synthetase	8	0.00487939	0.050584	IARS, WARS, CARS, NARS, SARS, LARS, EARS2, MARS	1157	38	12826	2.3338	1	0.317535	51.092
UP_KEYWORDS	Calcium transport	10	0.00609923	0.0506033	BSPRY, SLC8A2, SLC24A3, TRPV2, RYR1, CACNA1G, RYR2, TRPV4, CACNA1C, CACNA1B	1157	54	12826	2.05288	1	0.312505	51.1057
UP_KEYWORDS	Sodium transport	10	0.00609923	0.0506033	HCN2, SLC38A4, ATP1B1, SLC23A1, SLC8A2, SLC24A3, SLC20A2, SCNN1A, SCN5A, SLC34A2	1157	54	12826	2.05288	1	0.312505	51.1057
GOTERM_CC_DIRECT	GO:0014069~postsynaptic density	25	0.0152481	0.0377559	CLSTN3, NR3C1, ADORA1, DAB1, MACF1, DLG3, NEFH, PAK1, NEFM, DCLK1, BCAS1, DLGAP1, MAGI2, DLGAP3, CRYAB, MET, BSN, DGKI, SHANK1, IGSF9B, SHANK2, EPHA4, ITGA8, CACNA1C, ADD2	1073	182	11880	1.52085	1	0.428627	42.6284
INTERPRO	IPR001101:Plectin repeat	4	0.00243969	0.0123581	EVPL, MACF1, PPL, DSP	1105	6	12069	7.28145	1	0.380538	18.7709
UP_SEQ_FEATURE	domain:Cadherin 5	6	0.00365954	0.00784304	CDH22, CELSR3, CDH3, CDH4, CDH5, CDH23	1032	15	11563	4.48178	1	0.464341	12.9891
UP_SEQ_FEATURE	short sequence motif:"KMSKS" region	6	0.00365954	0.00784304	IARS, WARS, CARS, LARS, EARS2, MARS	1032	15	11563	4.48178	1	0.464341	12.9891
GOTERM_CC_DIRECT	GO:0043025~neuronal cell body	44	0.0268366	0.0386899	KCNC4, CPLX2, ACVRL1, RAP1GAP, STAR, TGFB3, L1CAM, ADORA1, ALCAM, SLC1A4, DAB1, RAC3, CHRNA4, DLG3, TUBB4A, DIXDC1, HCN2, HPN, SLC8A2, PTGER4, DLGAP3, KIF5A, NCF1, MET, SLC12A5, DPYSL5, BSN, FZD3, PDE10A, CD40, DGKI, IGSF9B, CNGA3, SHANK2, ANXA3, RUFY3, KDR, CYBA, CPE, P2RX3, CNTN2, CACNA1G, CACNA1C, CACNA1B	1073	363	11880	1.34203	1	0.427588	43.4271
INTERPRO	IPR000276:G protein-coupled receptor, rhodopsin-like	14	0.00853893	0.0127494	GPR162, PTGER4, CXCR2, PROKR1, ADORA1, GPR153, CCRL2, KISS1R, S1PR1, LPAR5, LPAR6, GPR50, ADRA2B, HTR1D	1105	72	12069	2.12376	1	0.382699	19.3072
UP_KEYWORDS	Steroidogenesis	4	0.00243969	0.0541652	STAR, CYP11A1, HSD3B6, CYP21A1	1157	10	12826	4.43423	1	0.32571	53.5736
UP_KEYWORDS	Deafness	4	0.00243969	0.0541652	MYO15, MITF, GIPC3, CDH23	1157	10	12826	4.43423	1	0.32571	53.5736
UP_KEYWORDS	Annexin	4	0.00243969	0.0541652	ANXA8, ANXA1, ANXA4, ANXA3	1157	10	12826	4.43423	1	0.32571	53.5736
KEGG_PATHWAY	mmu04925:Aldosterone synthesis and secretion	11	0.00670916	0.0777339	PRKD1, ADCY1, ATF4, STAR, CYP11A1, HSD3B6, CYP21A1, CACNA1G, CREB3L1, CREB3L3, CACNA1C	453	62	4605	1.80357	1	0.563355	65.1866
GOTERM_MF_DIRECT	GO:0008237~metallopeptidase activity	16	0.00975878	0.0189566	STAMBP, AGBL2, CPM, ADAMTS20, ADAM23, ADAMTS15, NAALADL1, MMP14, MMP12, MMP24, ADAMTS9, ADAMTS8, CPE, CPXM1, DPEP3, ADAMTS1	991	91	10722	1.90231	1	0.512607	26.3369
GOTERM_CC_DIRECT	GO:0043034~costamere	5	0.00304962	0.0401698	ACTG1, KRT19, DMD, KRT8, SDC4	1073	15	11880	3.69059	1	0.431078	44.6715
UP_KEYWORDS	Calcium channel	7	0.00426946	0.0553283	TRPV2, RYR1, CACNA1G, RYR2, TRPV4, CACNA1C, CACNA1B	1157	31	12826	2.50319	1	0.326457	54.354
GOTERM_CC_DIRECT	GO:0031988~membrane-bounded vesicle	4	0.00243969	0.0406892	SLC26A6, SYT8, GGT1, BMP6	1073	9	11880	4.92078	1	0.426742	45.1022
UP_SEQ_FEATURE	domain:Cadherin 2	7	0.00426946	0.0083445	CDH22, CLSTN3, CELSR3, CDH3, CDH4, CDH5, CDH23	1032	21	11563	3.73482	1	0.474921	13.763
UP_SEQ_FEATURE	short sequence motif:WSXWS motif	7	0.00426946	0.0083445	IL2RB, PRLR, OSMR, LEPR, LIFR, EPOR, IL3RA	1032	21	11563	3.73482	1	0.474921	13.763
UP_SEQ_FEATURE	domain:Cadherin 1	7	0.00426946	0.0083445	CDH22, CLSTN3, CELSR3, CDH3, CDH4, CDH5, CDH23	1032	21	11563	3.73482	1	0.474921	13.763
UP_SEQ_FEATURE	site:Stutter	5	0.00304962	0.00851389	KRT19, KRT18, KRT7, KRT14, KRT8	1032	10	11563	5.60223	1	0.471655	14.0229
GOTERM_CC_DIRECT	GO:0030425~dendrite	39	0.023787	0.0429842	GNAZ, KCNC4, CPLX2, ACVRL1, CADM1, RAP1GAP, GRIK3, CRHBP, L1CAM, TTLL7, ADORA1, ALCAM, SLC1A4, ATCAY, ANK3, CHRNA4, PAK1, HTR1D, KIF21B, PRSS12, MAGI2, NCF1, MET, DPYSL5, BSN, FZD3, SHANK1, IGSF9B, CNGA3, RUFY3, ANXA3, CYBA, EPHA4, CPE, GRM6, CACNA1G, OPHN1, CACNA1C, CACNA1B	1073	317	11880	1.36214	1	0.436402	46.968
GOTERM_CC_DIRECT	GO:0042825~TAP complex	3	0.00182977	0.0431483	TAP2, TAP1, TAPBP	1073	4	11880	8.30382	1	0.42951	47.0991
SMART	SM00325:RhoGEF	11	0.00670916	0.0708805	FGD2, OBSCN, NGEF, PLEKHG1, ARHGEF26, ARHGEF6, PLEKHG6, ARHGEF16, FGD3, FGD4, FARP2	677	58	6550	1.83492	1	0.610729	62.707
UP_KEYWORDS	Palmitate	25	0.0152481	0.0597692	GNAZ, OLR1, IFITM2, GNAI1, ITGB4, ABCA1, CXADR, ADORA1, ABCG1, TSPAN12, GNAL, ZDHHC14, PPP1R16B, CHIC1, S1PR1, TFRC, LPAR6, BACE1, 1700019D03RIK, CHRNA4, TGFA, ERAS, NOS3, AKAP7, ADRA2B	1157	191	12826	1.45099	1	0.342951	57.2235
KEGG_PATHWAY	mmu04911:Insulin secretion	10	0.00609923	0.0850325	ATP1B1, ADCY1, ATF4, ADCYAP1R1, RYR2, CREB3L1, PDX1, CREB3L3, RIMS2, CACNA1C	453	55	4605	1.84828	1	0.583136	68.6128
INTERPRO	IPR013320:Concanavalin A-like lectin/glucanase, subgroup	21	0.0128084	0.014311	LGALS3, TRIM17, CLSTN3, COL22A1, CELSR3, PTPRU, MID1, ALK, TRIM62, COL5A1, MID2, TRIM46, FSD1, BSPRY, CLGN, COL27A1, RYR1, RYR2, CALR3, THBS1, COL11A2	1105	130	12069	1.76435	1	0.410989	21.4148
SMART	SM00181:EGF	17	0.0103687	0.0712432	VASN, SCUBE3, SUSD1, TNC, SCUBE1, CELSR3, DLK2, JAG1, NID2, MUC4, HMCN2, C1RA, THBD, ACAN, THBS1, MEGF6, VLDLR	677	105	6550	1.56643	1	0.597697	62.9018
GOTERM_CC_DIRECT	GO:0005604~basement membrane	12	0.00731908	0.0438668	HMCN2, TNC, ACAN, ITGB4, EFNA5, ADAMTS1, NID2, COL8A2, TIMP3, COL5A1, FN1, RELL2	1073	69	11880	1.92552	1	0.427016	47.6697
UP_KEYWORDS	Meiosis	10	0.00609923	0.0614992	TEX19.1, MEI4, TEX15, CLGN, DPEP3, BRDT, STAG3, H2AFX, DMC1, SYCP1	1157	56	12826	1.97957	1	0.346022	58.2953
UP_KEYWORDS	Hydroxylation	9	0.00548931	0.0632392	C1RA, EPAS1, COL6A2, H2-D1, CELSR3, COL25A1, COL11A2, COL8A2, COL5A1	1157	48	12826	2.07854	1	0.349031	59.3482
GOTERM_BP_DIRECT	GO:0006874~cellular calcium ion homeostasis	13	0.007929	0.00671382	VDR, ATP1B1, HERPUD1, SLC8A2, SLC24A3, SLC24A1, RYR1, XK, RYR2, TRPV4, STC1, CD40, CACNA1C	1008	60	11126	2.3915	1	0.497944	11.6345
SMART	SM00335:ANX	4	0.00243969	0.0756725	ANXA8, ANXA1, ANXA4, ANXA3	677	10	6550	3.87001	1	0.606298	65.2065
SMART	SM00120:HX	4	0.00243969	0.0756725	MMP28, MMP14, MMP12, MMP24	677	10	6550	3.87001	1	0.606298	65.2065
UP_SEQ_FEATURE	repeat:4	12	0.00731908	0.0095319	PRX, FMN2, EPN3, APC2, LGALS3, MFSD7C, BSN, NEFH, ALMS1, HIVEP2, SRGN, MUC4	1032	56	11563	2.40096	1	0.500547	15.5695
INTERPRO	IPR010294:ADAM-TS Spacer 1	6	0.00365954	0.015441	ADAMTS9, ADAMTS8, ADAMTS20, ADAMTS15, THSD4, ADAMTS1	1105	17	12069	3.85488	1	0.427901	22.9075
GOTERM_BP_DIRECT	GO:0031100~organ regeneration	10	0.00609923	0.00691827	PGF, PPARG, AXL, LIFR, PDX1, PTPRU, NR4A3, ANGPT2, ANXA3, LCP1	1008	39	11126	2.83018	1	0.498612	11.9679
KEGG_PATHWAY	mmu05144:Malaria	5	0.00304962	0.0927026	ICAM1, MET, TGFB3, CD40, THBS1	453	18	4605	2.82377	1	0.602438	71.8758
GOTERM_CC_DIRECT	GO:0009925~basal plasma membrane	7	0.00426946	0.0483597	SLC23A1, TACSTD2, ANK3, MET, ITGB4, SLCO3A1, CEACAM1	1073	30	11880	2.58341	1	0.451583	51.1097
GOTERM_BP_DIRECT	GO:0001666~response to hypoxia	24	0.0146382	0.00708515	ATP1B1, ACVRL1, EPAS1, CRYAB, PGF, APOLD1, TGFB3, SOX4, MMP14, ADORA1, KDR, CITED2, ASCL2, CYBA, CD38, PRMT2, ETS1, P2RX3, RYR1, CHRNA4, RYR2, PAK1, NOS2, ANGPT2	1008	148	11126	1.7899	1	0.497408	12.2391
KEGG_PATHWAY	mmu05145:Toxoplasmosis	13	0.007929	0.0952518	TNFRSF1A, IRGM1, IGTP, HSPA2, MAPK13, GNAI1, SOCS1, TGFB3, HSPA1A, NOS2, CD40, HSPA1B, H2-DMA	453	81	4605	1.63151	1	0.599558	72.8889
UP_KEYWORDS	Keratinization	3	0.00182977	0.0675223	EVPL, PPL, TGM1	1157	5	12826	6.65134	1	0.363232	61.8358
UP_KEYWORDS	Synapse	27	0.0164679	0.0686524	CADM1, GABRB3, GRIK3, SYT9, RIMS2, NRN1, RIMS4, RIMS3, ATCAY, DMXL2, ANK3, DMD, CHRNA4, OLFM2, LRFN2, DLGAP1, MAGI2, DLGAP3, BSN, RGS17, IGSF9B, SHANK1, SHANK2, EPHA4, DACT1, OPHN1, FAIM2	1157	213	12826	1.40521	1	0.363176	62.4681
GOTERM_MF_DIRECT	GO:0046979~TAP2 binding	3	0.00182977	0.0239829	TAP2, TAP1, TAPBP	991	3	10722	10.8194	1	0.58571	32.139
GOTERM_MF_DIRECT	GO:0046978~TAP1 binding	3	0.00182977	0.0239829	TAP2, TAP1, TAPBP	991	3	10722	10.8194	1	0.58571	32.139
UP_SEQ_FEATURE	repeat:8	9	0.00548931	0.0103749	PRX, FMN2, LGALS3, MFSD7C, NEFH, ALMS1, HIVEP2, SRGN, MUC4	1032	35	11563	2.88115	1	0.520475	16.8303
UP_SEQ_FEATURE	domain:Ig-like C2-type 4	9	0.00548931	0.0103749	ICAM1, PDGFRA, NFASC, CNTN2, PDGFRB, L1CAM, KIT, CSF1R, KDR	1032	35	11563	2.88115	1	0.520475	16.8303
GOTERM_CC_DIRECT	GO:0001772~immunological synapse	6	0.00365954	0.0506903	ALCAM, ICAM1, CORO1A, CD37, LGALS3, CD6	1073	23	11880	2.88829	1	0.459777	52.8101
UP_KEYWORDS	Calcium/phospholipid-binding	4	0.00243969	0.0696299	ANXA8, ANXA1, ANXA4, ANXA3	1157	11	12826	4.03111	1	0.362476	63.0073
INTERPRO	IPR020479:Homeodomain, metazoa	9	0.00548931	0.0167698	DLX3, EVX1, HOXA11, NKX2-9, HOXA7, HOXA10, GBX1, VAX2, PDX1	1105	37	12069	2.65674	1	0.447567	24.6287
UP_KEYWORDS	Collagen	8	0.00487939	0.0714776	P4HA2, COL27A1, COL6A3, COL6A2, COL25A1, COL11A2, COL8A2, COL5A1	1157	41	12826	2.16304	1	0.365459	64.0068
UP_KEYWORDS	Innate immunity	18	0.0109786	0.0715303	APOBEC3, IRGM1, LGALS3, IFITM2, AXL, ANXA1, OAS3, TLR5, AIM2, ISG20, PRKD1, C1RA, TMEM173, IL1RAP, PRDM1, JAK3, OAS1A, CSF1R	1157	129	12826	1.54682	1	0.360928	64.035
UP_KEYWORDS	Monooxygenase	7	0.00426946	0.0715365	CYP11A1, CYP4F17, CYP2S1, CYP21A1, MICAL3, CYP4F13, CYP26A1	1157	33	12826	2.35148	1	0.356322	64.0382
GOTERM_BP_DIRECT	GO:0007409~axonogenesis	15	0.00914885	0.00761498	ADCY1, NDN, NKX2-9, PAX6, VAX2, NRN1, LINGO1, SLITRK4, APP, RNF165, ANK3, CNTN2, PAK1, DCLK1, LRFN2	1008	76	11126	2.17849	1	0.513324	13.095
SMART	SM00631:Zn_pept	3	0.00182977	0.0861172	CPM, CPE, CPXM1	677	5	6550	5.80502	1	0.642017	70.1268
GOTERM_BP_DIRECT	GO:0007157~heterophilic cell-cell adhesion via plasma membrane cell adhesion molecules	9	0.00548931	0.00783518	ALCAM, AMIGO3, CADM4, CADM1, L1CAM, CXADR, CD6, CDH4, CD200	1008	33	11126	3.01028	1	0.514251	13.4484
GOTERM_CC_DIRECT	GO:0043196~varicosity	4	0.00243969	0.0543201	CADM1, CRHBP, MGLL, CD40	1073	10	11880	4.4287	1	0.475913	55.3492
INTERPRO	IPR009057:Homeodomain-like	27	0.0164679	0.0179068	EVX1, HOXA11, PAX6, HOXB13, HOXD13, PAX3, PDX1, ZEB1, MEIS3, LHX2, POU2F3, HOXA7, HOXA10, GBX1, RHOX6, NKX2-9, ZHX1, ZHX2, SIX5, VAX2, RHOX9, DLX3, HOXC13, RHOX12, ZFHX2, ZFHX3, UNCX	1105	185	12069	1.59405	1	0.462185	26.0727
UP_SEQ_FEATURE	domain:PH	26	0.015858	0.0114938	RALGPS1, FERMT1, ASAP3, APBB1IP, PLCL2, RASAL1, ARHGAP20, GAB2, DAPP1, PLEKHG6, AGAP2, RASA4, PHLDA2, IQSEC1, OBSCN, NGEF, ARHGEF6, ARHGEF16, PSD4, PRKD1, PLEKHA3, DOK2, PLEKHA6, OPHN1, GRB7, PHLDB2	1032	174	11563	1.67423	1	0.547364	18.4764
GOTERM_CC_DIRECT	GO:0005581~collagen trimer	8	0.00487939	0.0573339	P4HA2, COL27A1, COL6A3, COL6A2, COL25A1, COL11A2, COL8A2, COL5A1	1073	39	11880	2.27113	1	0.487187	57.3601
GOTERM_MF_DIRECT	GO:0030165~PDZ domain binding	15	0.00914885	0.027664	HCN2, MAGI2, CADM1, DLGAP3, MPP2, ARHGEF16, L1CAM, FZD3, CXADR, FZD7, LNX1, SLC26A6, SNTB1, DLG3, PDZK1	991	87	10722	1.86541	1	0.62675	36.1133
GOTERM_BP_DIRECT	GO:0001525~angiogenesis	27	0.0164679	0.0085299	ACVRL1, PGF, LEPR, HOXB13, WARS, TSPAN12, S1PR1, HOXA7, TGFA, NOS3, ADRA2B, PLXND1, COL8A2, ANGPT2, FN1, EPAS1, EFNB2, APOLD1, MMP14, FZD5, EPHA1, ECM1, KDR, PRKD1, CXCL17, JUN, WNT7A	1008	176	11126	1.69328	1	0.535457	14.5544
GOTERM_MF_DIRECT	GO:0004896~cytokine receptor activity	7	0.00426946	0.0281532	IL2RB, PRLR, OSMR, LEPR, LIFR, EPOR, IL3RA	991	26	10722	2.91291	1	0.621611	36.6247
GOTERM_MF_DIRECT	GO:0004871~signal transducer activity	31	0.0189076	0.028321	GNAZ, GPR162, GNA15, GNAI1, ADCYAP1R1, CXCR2, ADORA1, PLCL2, STAT6, CCRL2, KISS1R, S1PR1, IL1RAP, HTR1D, GPR157, MAGI2, PTGER4, CELSR3, PROKR1, FZD3, FZD5, ECM1, FZD7, GPR153, LSP1, GNAL, LPAR5, LPAR6, GRM6, PDGFRB, GPR50	991	227	10722	1.47754	1	0.612516	36.7992
GOTERM_MF_DIRECT	GO:0001105~RNA polymerase II transcription coactivator activity	8	0.00487939	0.0283923	SOX11, HIPK2, TBX20, SOX4, CITED4, SMARCA2, CITED1, CITED2	991	33	10722	2.62288	1	0.602496	36.8733
INTERPRO	IPR001128:Cytochrome P450	6	0.00365954	0.0198054	CYP11A1, CYP4F17, CYP2S1, CYP21A1, CYP4F13, CYP26A1	1105	18	12069	3.64072	1	0.489342	28.4261
INTERPRO	IPR023413:Green fluorescent protein-like	4	0.00243969	0.0201685	HMCN2, SCUBE1, SUSD1, NID2	1105	7	12069	6.24124	1	0.488415	28.8681
INTERPRO	IPR014766:Carboxypeptidase, regulatory domain	4	0.00243969	0.0201685	CPM, CILP2, CPE, CPXM1	1105	7	12069	6.24124	1	0.488415	28.8681
GOTERM_BP_DIRECT	GO:0048843~negative regulation of axon extension involved in axon guidance	7	0.00426946	0.00896348	SEMA5A, SEMA5B, SEMA6A, SEMA6C, SEMA6D, SEMA3G, SEMA4F	1008	21	11126	3.67923	1	0.544425	15.2379
GOTERM_BP_DIRECT	GO:0045216~cell-cell junction organization	7	0.00426946	0.00896348	CLDN9, OCLN, MARVELD3, TGFB3, CRB3, CXADR, CEACAM1	1008	21	11126	3.67923	1	0.544425	15.2379
GOTERM_BP_DIRECT	GO:0031424~keratinization	5	0.00304962	0.00897726	EVPL, PPL, TGM1, SFN, CDH3	1008	10	11126	5.51885	1	0.536366	15.2595
GOTERM_BP_DIRECT	GO:0060065~uterus development	5	0.00304962	0.00897726	CDKN1C, RBP4, HOXA11, HOXA10, WNT7A	1008	10	11126	5.51885	1	0.536366	15.2595
UP_KEYWORDS	Inflammatory response	10	0.00609923	0.0874792	PRKD1, ELF3, OLR1, IL1RAP, ANXA1, CHST2, IL17RE, TLR5, AIM2, CSF1R	1157	60	12826	1.84759	1	0.414176	71.6733
UP_KEYWORDS	Voltage-gated channel	10	0.00609923	0.0874792	KCNS3, HCN2, KCNC4, KCNAB3, CACNA1G, KCNQ2, CACNA1C, KCNH3, SCN5A, CACNA1B	1157	60	12826	1.84759	1	0.414176	71.6733
GOTERM_BP_DIRECT	GO:0006887~exocytosis	15	0.00914885	0.00958344	CPLX2, RAB3D, MICAL3, SYT8, SCRN1, EXOC3L, RIMS2, RIMS4, RIMS3, UNC13D, EXOC6, PAK1, SYTL1, PRSS12, SLC17A9	1008	78	11126	2.12263	1	0.551445	16.2062
INTERPRO	IPR013761:Sterile alpha motif/pointed domain	15	0.00914885	0.0214935	CASKIN1, CNKSR1, ERG, ELF3, L3MBTL3, DGKH, BICC1, SHANK1, EPHA1, SHANK2, EPHA4, EPHB6, SAMD5, ETS1, EPHA8	1105	85	12069	1.92744	1	0.503499	30.4593
GOTERM_MF_DIRECT	GO:0017127~cholesterol transporter activity	4	0.00243969	0.0308514	STAR, ABCA1, ABCG4, ABCG1	991	8	10722	5.40969	1	0.622822	39.3772
GOTERM_MF_DIRECT	GO:0015179~L-amino acid transmembrane transporter activity	4	0.00243969	0.0308514	SLC7A8, SLC7A4, SLC7A5, SLC7A7	991	8	10722	5.40969	1	0.622822	39.3772
GOTERM_MF_DIRECT	GO:0004181~metallocarboxypeptidase activity	4	0.00243969	0.0308514	AGBL2, CPM, CPE, CPXM1	991	8	10722	5.40969	1	0.622822	39.3772
GOTERM_MF_DIRECT	GO:0005003~ephrin receptor activity	4	0.00243969	0.0308514	EPHA4, EPHB6, EPHA8, EPHA1	991	8	10722	5.40969	1	0.622822	39.3772
GOTERM_CC_DIRECT	GO:0043195~terminal bouton	11	0.00670916	0.0649704	PFN2, CPLX2, APP, GABRB3, AAK1, P2RX3, GRIK3, OPHN1, L1CAM, ADORA1, PRSS12	1073	65	11880	1.87368	1	0.524472	62.0843
GOTERM_BP_DIRECT	GO:0008584~male gonad development	16	0.00975878	0.00974564	TEX19.1, RBP4, INSL3, TESC, STAR, REN1, HOXA11, KIT, TLR5, MMP14, KITL, CITED2, KDR, NUPR1, SFRP1, HOXA10	1008	86	11126	2.05353	1	0.549244	16.4578
UP_SEQ_FEATURE	short sequence motif:"HIGH" region	6	0.00365954	0.0139144	IARS, WARS, CARS, LARS, EARS2, MARS	1032	17	11563	3.95451	1	0.607607	21.9329
INTERPRO	IPR024079:Metallopeptidase, catalytic domain	10	0.00609923	0.0216927	ADAMTS9, ADAMTS8, ADAMTS20, ADAM23, ADAMTS15, ADAMTS1, MMP28, MMP14, MMP12, MMP24	1105	46	12069	2.37439	1	0.499723	30.6955
GOTERM_MF_DIRECT	GO:0001664~G-protein coupled receptor binding	8	0.00487939	0.0330027	INSL3, GNA15, S1PR1, GNAI1, GPRASP2, ITGB4, HSPA1A, ADORA1	991	34	10722	2.54574	1	0.637662	41.4911
GOTERM_CC_DIRECT	GO:0045095~keratin filament	4	0.00243969	0.0698243	KRT18, KRT7, KRT14, KRT8	1073	11	11880	4.0261	1	0.543369	64.8288
UP_KEYWORDS	Guanine-nucleotide releasing factor	17	0.0103687	0.0910073	FGD2, NGEF, RALGPS1, MADD, ARHGEF6, RASGEF1B, RGL3, ARHGEF16, RAB3IL1, PSD4, DOCK3, FARP2, RAPGEFL1, IQSEC1, FGD3, FGD4, MON1A	1157	124	12826	1.5198	1	0.422274	73.1456
UP_KEYWORDS	Potassium transport	9	0.00548931	0.0923137	KCNS3, HCN2, ATP1B1, KCNC4, KCNAB3, SLC24A3, SLC12A5, KCNQ2, KCNH3	1157	52	12826	1.91866	1	0.422101	73.6725
UP_KEYWORDS	Heme	10	0.00609923	0.0948554	CYBA, CYP11A1, CYP4F17, CYP2S1, CYP21A1, CYP4F13, CYP26A1, NOS3, NOS2, STEAP2	1157	61	12826	1.81731	1	0.42632	74.6704
UP_KEYWORDS	Spermatogenesis	14	0.00853893	0.0952306	TEX19.1, CADM1, ADCYAP1R1, RHBDD1, TAF7L, TEX15, CLGN, HSPA2, TDRKH, MYCBPAP, IQCG, BRDT, CALR3, CHD5	1157	97	12826	1.59998	1	0.422858	74.8147
GOTERM_BP_DIRECT	GO:0048469~cell maturation	8	0.00487939	0.0106029	GATA2, EPAS1, REN1, ID2, PPARG, AXL, FZD5, KDR	1008	28	11126	3.15363	1	0.571739	17.7758
GOTERM_BP_DIRECT	GO:0071320~cellular response to cAMP	9	0.00548931	0.0113055	HCN2, SLC26A6, APP, STAR, AQP9, CRHBP, STC1, AKAP7, AHR	1008	35	11126	2.83827	1	0.587235	18.8414
GOTERM_BP_DIRECT	GO:0048013~ephrin receptor signaling pathway	9	0.00548931	0.0113055	EPHA4, NGEF, EPHB6, EPHA8, EFNB1, EFNB2, CHN1, EFNA5, EPHA1	1008	35	11126	2.83827	1	0.587235	18.8414
GOTERM_BP_DIRECT	GO:0060054~positive regulation of epithelial cell proliferation involved in wound healing	4	0.00243969	0.0119963	CXADR, WNT7A, MMP12, FZD7	1008	6	11126	7.35847	1	0.601196	19.8762
GOTERM_BP_DIRECT	GO:2000300~regulation of synaptic vesicle exocytosis	4	0.00243969	0.0119963	PFN2, RIMS2, RIMS4, RIMS3	1008	6	11126	7.35847	1	0.601196	19.8762
GOTERM_BP_DIRECT	GO:0002489~antigen processing and presentation of endogenous peptide antigen via MHC class Ib via ER pathway, TAP-dependent	4	0.00243969	0.0119963	ABCB1B, TAP2, TAP1, H2-T23	1008	6	11126	7.35847	1	0.601196	19.8762
GOTERM_BP_DIRECT	GO:0007565~female pregnancy	11	0.00670916	0.0127992	CD38, THBD, PGF, ETS1, PSG19, CRHBP, ENDOU, TGFB3, ADRA2B, IGFBP2, HPGD	1008	50	11126	2.42829	1	0.617403	21.0634
GOTERM_BP_DIRECT	GO:0090280~positive regulation of calcium ion import	5	0.00304962	0.0131095	LGALS3, TRPV2, GRM6, PDGFRB, STC1	1008	11	11126	5.01714	1	0.618686	21.5177
GOTERM_BP_DIRECT	GO:0001558~regulation of cell growth	10	0.00609923	0.0132919	SGK1, TMC8, CLSTN3, NANOS1, IGFBP6, BAP1, HTRA3, IGFBP2, CEACAM1, IL3RA	1008	43	11126	2.56691	1	0.616372	21.7836
GOTERM_BP_DIRECT	GO:0006836~neurotransmitter transport	7	0.00426946	0.0142699	SLC6A9, CPLX2, SLC6A2, SLC6A12, RIMS2, RIMS4, RIMS3	1008	23	11126	3.3593	1	0.635382	23.1948
GOTERM_BP_DIRECT	GO:0007204~positive regulation of cytosolic calcium ion concentration	13	0.007929	0.0143261	GNA15, PTGER4, CXCR2, KDR, CD38, CXCL17, GATA2, CACNA1G, PDGFRA, TRPV4, EPOR, JAK3, CACNA1C	1008	66	11126	2.17409	1	0.629696	23.2753
GOTERM_BP_DIRECT	GO:0007420~brain development	25	0.0152481	0.0143965	BMI1, STAR, CADM1, STK36, PAX6, CITED1, CDH22, CTTNBP2, SCT, SLC23A1, S1PR1, B3GNT5, LHX2, NEFH, DCLK1, FOXJ1, MET, ALK, AK7, EML1, ID1, ITGA8, EFNA5, EPOR, ZFHX3	1008	166	11126	1.6623	1	0.624505	23.3757
GOTERM_BP_DIRECT	GO:0007160~cell-matrix adhesion	11	0.00670916	0.0146685	LYPD3, HPSE, ITGA8, ITGA1, ITGB4, CNTN2, NID2, SIRPA, FN1, ITGA2B, MUC4	1008	51	11126	2.38068	1	0.624564	23.7631
GOTERM_BP_DIRECT	GO:0048791~calcium ion-regulated exocytosis of neurotransmitter	6	0.00365954	0.0147851	SYT8, SYT9, RIMS2, SYTL1, RIMS4, RIMS3	1008	17	11126	3.89566	1	0.620749	23.9285
UP_SEQ_FEATURE	repeat:1	16	0.00975878	0.017134	PRX, EPN3, LGALS3, APC2, OLR1, BSN, ALMS1, ECM1, CTLA2B, MUC4, FMN2, MFSD7C, NEFH, HIVEP2, NFATC2, SRGN	1032	93	11563	1.92765	1	0.675104	26.3165
UP_SEQ_FEATURE	domain:Cadherin 4	6	0.00365954	0.0178822	CDH22, CELSR3, CDH3, CDH4, CDH5, CDH23	1032	18	11563	3.73482	1	0.681599	27.3014
UP_SEQ_FEATURE	domain:Cadherin 3	6	0.00365954	0.0178822	CDH22, CELSR3, CDH3, CDH4, CDH5, CDH23	1032	18	11563	3.73482	1	0.681599	27.3014
GOTERM_BP_DIRECT	GO:0001974~blood vessel remodeling	8	0.00487939	0.0185715	ACVRL1, EPAS1, AXL, TGM2, NOS3, JAG1, ANGPT2, AHR	1008	31	11126	2.84844	1	0.698328	29.1213
UP_SEQ_FEATURE	repeat:2	16	0.00975878	0.0187657	PRX, EPN3, LGALS3, APC2, OLR1, BSN, ALMS1, ECM1, CTLA2B, MUC4, FMN2, MFSD7C, NEFH, HIVEP2, NFATC2, SRGN	1032	94	11563	1.90714	1	0.69032	28.4483
GOTERM_BP_DIRECT	GO:0030534~adult behavior	6	0.00365954	0.0189799	MET, NR4A3, SHANK1, ZFHX2, ALK, SHANK2	1008	18	11126	3.67923	1	0.699867	29.6609
UP_SEQ_FEATURE	active site:Charge relay system	15	0.00914885	0.0193328	KLK7, HPN, KLK8, LIPA, NOTUM, NAALADL1, PRSS8, C1RA, ST14, LIPG, LIPH, MGLL, PRSS42, HTRA3, PRSS12	1032	86	11563	1.95427	1	0.692485	29.1756
GOTERM_BP_DIRECT	GO:0098911~regulation of ventricular cardiac muscle cell action potential	4	0.00243969	0.019593	PKP2, RYR2, DSP, CACNA1C	1008	7	11126	6.30726	1	0.705173	30.4636
UP_SEQ_FEATURE	repeat:7	9	0.00548931	0.019773	PRX, FMN2, LGALS3, MFSD7C, NEFH, ALMS1, HIVEP2, SRGN, MUC4	1032	39	11563	2.58564	1	0.692197	29.7352
UP_SEQ_FEATURE	domain:Fibronectin type-III	8	0.00487939	0.0203993	VASN, FSD1, TRIM46, IL2RB, EPOR, MID1, MID2, LRFN2	1032	32	11563	2.80111	1	0.695282	30.5243
UP_SEQ_FEATURE	DNA-binding region:Homeobox 4	3	0.00182977	0.0224155	ZHX1, ZHX2, ZFHX3	1032	3	11563	11.2045	1	0.721437	33.0082
UP_SEQ_FEATURE	region of interest:Necessary for interaction with PNN	3	0.00182977	0.0224155	KRT19, KRT18, KRT8	1032	3	11563	11.2045	1	0.721437	33.0082
UP_SEQ_FEATURE	DNA-binding region:Homeobox 3	3	0.00182977	0.0224155	ZHX1, ZHX2, ZFHX3	1032	3	11563	11.2045	1	0.721437	33.0082
UP_SEQ_FEATURE	domain:Ig-like V-type	9	0.00548931	0.0228463	IGSF11, CADM4, CADM1, ACAN, ILDR1, NFAM1, SIRPA, CD200, CEACAM1	1032	40	11563	2.521	1	0.720469	33.528
GOTERM_BP_DIRECT	GO:0086045~membrane depolarization during AV node cell action potential	3	0.00182977	0.0230744	CACNA1G, CACNA1C, SCN5A	1008	3	11126	11.0377	1	0.757442	34.8604
GOTERM_BP_DIRECT	GO:0071621~granulocyte chemotaxis	3	0.00182977	0.0230744	ANXA1, IL17RC, IL17RA	1008	3	11126	11.0377	1	0.757442	34.8604
GOTERM_BP_DIRECT	GO:0033693~neurofilament bundle assembly	3	0.00182977	0.0230744	NEFH, NEFL, NEFM	1008	3	11126	11.0377	1	0.757442	34.8604
UP_SEQ_FEATURE	domain:Ig-like C1-type	5	0.00304962	0.0233581	H2-K1, H2-D1, H2-T23, H2-DMA, TAPBP	1032	13	11563	4.30941	1	0.720792	34.1405
INTERPRO	IPR007365:Transferrin receptor-like, dimerisation domain	3	0.00182977	0.0235548	TFRC, TFR2, NAALADL1	1105	3	12069	10.9222	1	0.521931	32.8682
INTERPRO	IPR007576:CITED	3	0.00182977	0.0235548	CITED4, CITED1, CITED2	1105	3	12069	10.9222	1	0.521931	32.8682
INTERPRO	IPR013098:Immunoglobulin I-set	15	0.00914885	0.0235896	OBSCN, CADM1, PSG19, NFASC, PTPRS, L1CAM, CXADR, KDR, HMCN2, LINGO1, CNTN2, ROR1, PDGFRA, MFAP3L, LRFN2	1105	86	12069	1.90503	1	0.515623	32.9083
GOTERM_BP_DIRECT	GO:0007129~synapsis	6	0.00365954	0.0238868	TEX19.1, MEI4, TEX15, STAG3, DMC1, SYCP1	1008	19	11126	3.48559	1	0.763674	35.8478
INTERPRO	IPR001881:EGF-like calcium-binding	14	0.00853893	0.0238948	HMCN2, C1RA, THBD, SCUBE3, SCUBE1, SUSD1, ACAN, CELSR3, DLK2, NID2, JAG1, THBS1, MEGF6, VLDLR	1105	78	12069	1.96039	1	0.513504	33.258
UP_SEQ_FEATURE	repeat:10	7	0.00426946	0.024156	PRX, FMN2, NEFH, ALMS1, HIVEP2, SRGN, MUC4	1032	26	11563	3.01658	1	0.725394	35.0848
INTERPRO	IPR001452:Src homology-3 domain	26	0.015858	0.0242428	GRAP, ARHGEF26, SH3YL1, PRMT2, PTK6, MAP3K9, DLG3, UBASH3A, SH3TC2, CASKIN1, NGEF, OBSCN, NCF1, MPP2, ARHGEF6, BZRAP1, ARHGEF16, SHANK1, SHANK2, DOCK3, MYO15, SRGAP3, SH3RF2, TNK1, PPP1R13B, TJP3	1105	181	12069	1.56893	1	0.512084	33.6547
GOTERM_BP_DIRECT	GO:0030336~negative regulation of cell migration	14	0.00853893	0.0243112	MAGI2, ACVRL1, PODN, DPYSL3, PTPRU, EPHA1, CITED2, KISS1R, SFRP1, PKP2, SRGAP3, ACAN, STC1, KLF4	1008	79	11126	1.95605	1	0.764117	36.358
UP_SEQ_FEATURE	repeat:3	13	0.007929	0.0245488	PRX, EPN3, LGALS3, APC2, OLR1, ALMS1, BSN, MUC4, FMN2, MFSD7C, HIVEP2, NEFH, SRGN	1032	72	11563	2.02303	1	0.723872	35.545
GOTERM_BP_DIRECT	GO:0048596~embryonic camera-type eye morphogenesis	5	0.00304962	0.0245489	HIPK2, PAX6, ZEB1, FZD5, CITED2	1008	13	11126	4.24527	1	0.761929	36.642
GOTERM_BP_DIRECT	GO:0007268~chemical synaptic transmission	12	0.00731908	0.0246267	DLGAP1, SLC6A12, P2RX3, GRM6, MET, SLC12A5, MYCBPAP, CACNA1G, DLG3, HTR1D, CACNA1C, GJC1	1008	63	11126	2.10242	1	0.757546	36.7348
GOTERM_BP_DIRECT	GO:0001890~placenta development	9	0.00548931	0.0247506	DLX3, TEX19.1, ASCL2, CDKN1C, HSD17B2, PPARG, MET, PHLDA2, CITED1	1008	40	11126	2.48348	1	0.753873	36.8822
INTERPRO	IPR016054:Ly-6 antigen / uPA receptor -like	5	0.00304962	0.0254351	LY6A, LY6C1, LYPD3, CD59A, CD177	1105	13	12069	4.20084	1	0.522727	34.9971
GOTERM_BP_DIRECT	GO:0030216~keratinocyte differentiation	8	0.00487939	0.0257753	EVPL, POU2F3, ST14, TGM1, PAX6, ANXA1, DSP, SFN	1008	33	11126	2.67581	1	0.762655	38.0888
UP_SEQ_FEATURE	repeat:6	9	0.00548931	0.0262409	PRX, FMN2, LGALS3, MFSD7C, NEFH, ALMS1, HIVEP2, SRGN, MUC4	1032	41	11563	2.45952	1	0.740563	37.4924
INTERPRO	IPR018097:EGF-like calcium-binding, conserved site	12	0.00731908	0.0264246	HMCN2, C1RA, THBD, SCUBE3, SCUBE1, SUSD1, ACAN, DLK2, NID2, JAG1, MEGF6, VLDLR	1105	63	12069	2.08041	1	0.530036	36.0917
UP_SEQ_FEATURE	binding site:ATP	55	0.0335458	0.026936	CDK18, ACVRL1, STK36, CAMKK1, GSS, MAP3K9, WNK4, AAK1, PAK1, CARS, SGK1, PRKCH, WNK2, ALK, EARS2, PRKD1, MAST1, HIPK2, ROR1, RIPK3, PDGFRA, BMP2K, PDGFRB, NRK, MAP3K14, KIT, ACSBG1, IARS, TTBK1, PTK6, CKMT1, LARS, EHD2, DCLK1, CSF1R, MARS, PDK2, OBSCN, MAK, PDK3, PDK4, MET, TAOK3, AXL, EPHA1, KDR, RPS6KA6, EPHA4, IKBKE, MAPK13, EPHA8, RPS6KA2, TNK1, JAK3, MERTK	1032	466	11563	1.32241	1	0.742905	38.2762
INTERPRO	IPR016186:C-type lectin-like	7	0.00426946	0.0270428	MRC1, THBD, OLR1, KLRG2, ACAN, SUSD5, CD302	1105	26	12069	2.94058	1	0.532076	36.7668
UP_SEQ_FEATURE	compositionally biased region:Cys-rich	13	0.007929	0.0270831	ADAM23, ADAMTS20, ADAMTS15, ILDR1, EPHA1, ZDBF2, SLC34A2, EPHA4, CHIC1, EPHB6, ADAMTS8, EPHA8, ADAMTS1	1032	73	11563	1.99531	1	0.73804	38.4409
UP_SEQ_FEATURE	domain:TSP type-1 6	4	0.00243969	0.0281318	SEMA5A, SEMA5B, ADAMTS20, THSD4	1032	8	11563	5.60223	1	0.744852	39.6029
GOTERM_BP_DIRECT	GO:0042593~glucose homeostasis	15	0.00914885	0.0284103	RBP4, PDK2, LEPR, PPARG, PDK4, MET, PAX6, MLXIPL, ALMS1, SOX4, PDX1, SESN3, SLC2A4, TRPV4, CACNA1C	1008	89	11126	1.86029	1	0.790568	41.0923
GOTERM_BP_DIRECT	GO:0008284~positive regulation of cell proliferation	42	0.0256168	0.0285971	INSL3, CLDN7, PGF, OSMR, TNC, SOX4, CXCR2, PDX1, KIT, PAX3, HMGN5, GLI1, T, S1PR1, GAB2, TGFA, PAK1, THBS1, CSF1R, FN1, SHMT2, PTGER4, LGALS3, CRIP2, ACER2, SOX11, EFNB2, MLXIPL, LIFR, EPHA1, KITL, KDR, PRAMEF12, SFRP1, ID2, ETS1, JUN, HIPK2, PDGFRA, PDGFRB, EPOR, WNT7A	1008	335	11126	1.38383	1	0.787815	41.2999
UP_SEQ_FEATURE	repeat:9	7	0.00426946	0.0287869	PRX, FMN2, NEFH, ALMS1, HIVEP2, SRGN, MUC4	1032	27	11563	2.90486	1	0.746477	40.3183
INTERPRO	IPR001781:Zinc finger, LIM-type	11	0.00670916	0.029019	CRIP1, LMO1, CRIP2, LHX2, FHL1, PRICKLE3, ABLIM3, PRICKLE2, PDLIM4, MICAL3, ZFP185	1105	56	12069	2.14543	1	0.551438	38.8801
GOTERM_BP_DIRECT	GO:0007193~adenylate cyclase-inhibiting G-protein coupled receptor signaling pathway	6	0.00365954	0.0295415	GNAZ, INSL3, ADCY1, S1PR1, HTR1D, ADORA1	1008	20	11126	3.31131	1	0.793758	42.3389
GOTERM_BP_DIRECT	GO:0071346~cellular response to interferon-gamma	6	0.00365954	0.0295415	MRC1, GBP7, SLC26A6, STAR, NOS2, GBP2	1008	20	11126	3.31131	1	0.793758	42.3389
INTERPRO	IPR003585:Neurexin/syndecan/glycophorin C	4	0.00243969	0.0301049	CADM4, CADM1, SDC4, SDC3	1105	8	12069	5.46109	1	0.558716	40.0129
INTERPRO	IPR001426:Tyrosine-protein kinase, receptor class V, conserved site	4	0.00243969	0.0301049	EPHA4, EPHB6, EPHA8, EPHA1	1105	8	12069	5.46109	1	0.558716	40.0129
INTERPRO	IPR016257:Tyrosine-protein kinase, ephrin receptor	4	0.00243969	0.0301049	EPHA4, EPHB6, EPHA8, EPHA1	1105	8	12069	5.46109	1	0.558716	40.0129
INTERPRO	IPR000834:Peptidase M14, carboxypeptidase A	4	0.00243969	0.0301049	AGBL2, CPM, CPE, CPXM1	1105	8	12069	5.46109	1	0.558716	40.0129
INTERPRO	IPR016293:Peptidase M10A, metazoans	4	0.00243969	0.0301049	MMP28, MMP14, MMP12, MMP24	1105	8	12069	5.46109	1	0.558716	40.0129
INTERPRO	IPR001090:Ephrin receptor ligand binding domain	4	0.00243969	0.0301049	EPHA4, EPHB6, EPHA8, EPHA1	1105	8	12069	5.46109	1	0.558716	40.0129
INTERPRO	IPR001304:C-type lectin	6	0.00365954	0.0307756	MRC1, THBD, OLR1, KLRG2, ACAN, CD302	1105	20	12069	3.27665	1	0.560728	40.7027
INTERPRO	IPR008160:Collagen triple helix repeat	8	0.00487939	0.031589	COL27A1, COL6A3, COL22A1, COL6A2, COL25A1, COL11A2, COL8A2, COL5A1	1105	34	12069	2.56992	1	0.564335	41.5291
INTERPRO	IPR002126:Cadherin	7	0.00426946	0.032164	CDH22, CLSTN3, CELSR3, CDH3, CDH4, CDH5, CDH23	1105	27	12069	2.83167	1	0.565086	42.1069
INTERPRO	IPR000152:EGF-type aspartate/asparagine hydroxylation site	12	0.00731908	0.032541	HMCN2, C1RA, THBD, SCUBE3, SCUBE1, SUSD1, ACAN, DLK2, NID2, JAG1, MEGF6, VLDLR	1105	65	12069	2.0164	1	0.563583	42.4828
INTERPRO	IPR017972:Cytochrome P450, conserved site	5	0.00304962	0.0330921	CYP11A1, CYP4F17, CYP21A1, CYP4F13, CYP26A1	1105	14	12069	3.90078	1	0.564064	43.0281
GOTERM_BP_DIRECT	GO:0070588~calcium ion transmembrane transport	10	0.00609923	0.0335443	SLC8A2, SLC24A3, TRPV2, SLC24A1, RYR1, CACNA1G, RYR2, TRPV4, CACNA1C, CACNA1B	1008	50	11126	2.20754	1	0.829714	46.5529
GOTERM_BP_DIRECT	GO:0006418~tRNA aminoacylation for protein translation	8	0.00487939	0.0346825	IARS, WARS, CARS, NARS, SARS, LARS, EARS2, MARS	1008	35	11126	2.5229	1	0.835567	47.6969
INTERPRO	IPR013106:Immunoglobulin V-set	12	0.00731908	0.0359484	HMCN2, OBSCN, IGSF11, CADM4, CADM1, PSG19, ACAN, MXRA8, CXADR, SIRPA, CD200, CEACAM1	1105	66	12069	1.98585	1	0.589079	45.7774
INTERPRO	IPR001660:Sterile alpha motif domain	12	0.00731908	0.0359484	CASKIN1, CNKSR1, EPHA4, EPHB6, SAMD5, L3MBTL3, EPHA8, DGKH, BICC1, SHANK1, SHANK2, EPHA1	1105	66	12069	1.98585	1	0.589079	45.7774
GOTERM_BP_DIRECT	GO:0009952~anterior/posterior pattern specification	13	0.007929	0.0361174	T, SFRP1, HOXC13, HOXA11, HIPK2, HOXA7, PAX6, HOXA10, HOXD13, CYP26A1, ZIC3, TCF15, MLLT3	1008	75	11126	1.9132	1	0.843521	49.1062
GOTERM_BP_DIRECT	GO:0060326~cell chemotaxis	7	0.00426946	0.0361956	SEMA5A, ITGA1, PDGFRA, ARHGEF16, SAA3, PDGFRB, KIT	1008	28	11126	2.75942	1	0.840084	49.1819
GOTERM_BP_DIRECT	GO:0042102~positive regulation of T cell proliferation	7	0.00426946	0.0361956	CORO1A, TFRC, EFNB1, ANXA1, JAK3, CD6, CEACAM1	1008	28	11126	2.75942	1	0.840084	49.1819
GOTERM_BP_DIRECT	GO:0007417~central nervous system development	12	0.00731908	0.0370358	XRCC4, DAB1, NDN, B3GNT5, ACAN, CNTN2, CYP26A1, VNN1, PDX1, ID3, ZEB1, CITED2	1008	67	11126	1.9769	1	0.842883	49.9892
INTERPRO	IPR020904:Short-chain dehydrogenase/reductase, conserved site	6	0.00365954	0.0374444	HSD17B2, HSD17B14, HSD17B1, CBR3, HPGD, BDH1	1105	21	12069	3.12062	1	0.598694	47.1671
INTERPRO	IPR000742:Epidermal growth factor-like domain	19	0.0115885	0.0378507	VASN, SCUBE3, ADAM23, SCUBE1, SUSD1, TNC, CELSR3, DLK2, NID2, JAG1, MUC4, HMCN2, C1RA, THBD, ACAN, TGFA, THBS1, MEGF6, VLDLR	1105	126	12069	1.64699	1	0.597216	47.5387
INTERPRO	IPR015919:Cadherin-like	7	0.00426946	0.037876	CDH22, CLSTN3, CELSR3, CDH3, CDH4, CDH5, CDH23	1105	28	12069	2.73054	1	0.592043	47.5618
GOTERM_MF_DIRECT	GO:0022857~transmembrane transporter activity	7	0.00426946	0.039377	SLC2A12, SLC2A5, SLC2A4, SLC2A3, SLC22A7, SLC22A21, SLC17A9	991	28	10722	2.70484	1	0.693457	47.3562
UP_SEQ_FEATURE	domain:TSP N-terminal	4	0.00243969	0.0394514	COL27A1, THBS1, COL11A2, COL5A1	1032	9	11563	4.97976	1	0.843806	50.897
UP_SEQ_FEATURE	lipid moiety-binding region:GPI-anchor amidated serine	7	0.00426946	0.0397093	CPM, LYPD3, RTN4RL1, CD59A, DPEP3, CNTN2, NT5E	1032	29	11563	2.70452	1	0.840493	51.1295
GOTERM_BP_DIRECT	GO:0035019~somatic stem cell population maintenance	8	0.00487939	0.0398165	ASCL2, GATA2, SFRP1, ZHX2, SOX4, BCL9L, KIT, WNT7A	1008	36	11126	2.45282	1	0.859936	52.5753
GOTERM_BP_DIRECT	GO:0001818~negative regulation of cytokine production	4	0.00243969	0.0410031	PPARG, AXL, MERTK, CEACAM1	1008	9	11126	4.90564	1	0.864458	53.64
GOTERM_BP_DIRECT	GO:0045109~intermediate filament organization	4	0.00243969	0.0410031	VIM, DSP, KRT20, NEFL	1008	9	11126	4.90564	1	0.864458	53.64
GOTERM_BP_DIRECT	GO:0032026~response to magnesium ion	4	0.00243969	0.0410031	RYR2, THBS1, CNGA3, BMP6	1008	9	11126	4.90564	1	0.864458	53.64
GOTERM_BP_DIRECT	GO:0050908~detection of light stimulus involved in visual perception	4	0.00243969	0.0410031	SEMA5A, RBP4, SEMA5B, GRM6	1008	9	11126	4.90564	1	0.864458	53.64
GOTERM_BP_DIRECT	GO:0019228~neuronal action potential	4	0.00243969	0.0410031	ANK3, P2RX3, MYH14, SCN5A	1008	9	11126	4.90564	1	0.864458	53.64
INTERPRO	IPR013273:Peptidase M12B, ADAM-TS	5	0.00304962	0.0419482	ADAMTS9, ADAMTS8, ADAMTS20, ADAMTS15, ADAMTS1	1105	15	12069	3.64072	1	0.624937	51.1515
INTERPRO	IPR013806:Kringle-like fold	5	0.00304962	0.0419482	MRC1, ROR1, PIK3IP1, PRSS12, FN1	1105	15	12069	3.64072	1	0.624937	51.1515
INTERPRO	IPR001412:Aminoacyl-tRNA synthetase, class I, conserved site	5	0.00304962	0.0419482	IARS, WARS, LARS, EARS2, MARS	1105	15	12069	3.64072	1	0.624937	51.1515
INTERPRO	IPR013128:Peptidase C1A, papain	5	0.00304962	0.0419482	CTSJ, CTSO, CTSR, CTSC, CTLA2B	1105	15	12069	3.64072	1	0.624937	51.1515
GOTERM_BP_DIRECT	GO:0006935~chemotaxis	10	0.00609923	0.0419542	LSP1, CCRL2, CXCL17, S1PR1, PDGFRA, PDGFRB, AMOT, CXCR2, KIT, CMTM5	1008	52	11126	2.12263	1	0.867201	54.4769
INTERPRO	IPR000233:Cadherin, cytoplasmic domain	4	0.00243969	0.0421441	CDH22, CDH3, CDH4, CDH5	1105	9	12069	4.8543	1	0.621396	51.3181
INTERPRO	IPR002477:Peptidoglycan binding-like	4	0.00243969	0.0421441	MMP28, MMP14, MMP12, MMP24	1105	9	12069	4.8543	1	0.621396	51.3181
UP_SEQ_FEATURE	region of interest:Interaction with IFI204	3	0.00182977	0.0421916	ID2, ID1, ID3	1032	4	11563	8.40334	1	0.853197	53.3143
UP_SEQ_FEATURE	DNA-binding region:Homeobox 2	3	0.00182977	0.0421916	ZHX1, ZHX2, ZFHX3	1032	4	11563	8.40334	1	0.853197	53.3143
UP_SEQ_FEATURE	DNA-binding region:Homeobox 1	3	0.00182977	0.0421916	ZHX1, ZHX2, ZFHX3	1032	4	11563	8.40334	1	0.853197	53.3143
UP_SEQ_FEATURE	region of interest:Nonhelical region	3	0.00182977	0.0421916	COL6A2, COL11A2, COL5A1	1032	4	11563	8.40334	1	0.853197	53.3143
UP_SEQ_FEATURE	domain:SH3	20	0.0121985	0.0422806	CASKIN1, OBSCN, NGEF, MPP2, ARHGEF6, ARHGEF16, SHANK2, DOCK3, SH3YL1, PRMT2, MACF1, MAP3K9, PTK6, MYO15, SRGAP3, DLG3, TNK1, PPP1R13B, TJP3, SH3TC2	1032	140	11563	1.60064	1	0.848875	53.3909
GOTERM_MF_DIRECT	GO:0015175~neutral amino acid transmembrane transporter activity	4	0.00243969	0.0431616	SLC1A4, SLC7A8, SLC3A2, SLC7A5	991	9	10722	4.80861	1	0.717594	50.5728
GOTERM_MF_DIRECT	GO:0019955~cytokine binding	5	0.00304962	0.0431954	TNFRSF9, OSMR, LIFR, KIT, CSF1R	991	15	10722	3.60646	1	0.708576	50.6007
GOTERM_BP_DIRECT	GO:0045765~regulation of angiogenesis	6	0.00365954	0.043199	TSPAN12, WARS, ID1, ETS1, PLXND1, ANGPT2	1008	22	11126	3.01028	1	0.87167	55.5508
GOTERM_BP_DIRECT	GO:0010838~positive regulation of keratinocyte proliferation	3	0.00182977	0.0433914	TGM1, CDH3, TWIST2	1008	4	11126	8.27827	1	0.869457	55.7147
GOTERM_BP_DIRECT	GO:0055099~response to high density lipoprotein particle	3	0.00182977	0.0433914	ABCA1, ABCG4, ABCG1	1008	4	11126	8.27827	1	0.869457	55.7147
GOTERM_BP_DIRECT	GO:0045636~positive regulation of melanocyte differentiation	3	0.00182977	0.0433914	ADAMTS9, ADAMTS20, KITL	1008	4	11126	8.27827	1	0.869457	55.7147
GOTERM_BP_DIRECT	GO:0010510~regulation of acetyl-CoA biosynthetic process from pyruvate	3	0.00182977	0.0433914	PDK2, PDK3, PDK4	1008	4	11126	8.27827	1	0.869457	55.7147
GOTERM_BP_DIRECT	GO:0097350~neutrophil clearance	3	0.00182977	0.0433914	AXL, ANXA1, MERTK	1008	4	11126	8.27827	1	0.869457	55.7147
GOTERM_BP_DIRECT	GO:0061303~cornea development in camera-type eye	3	0.00182977	0.0433914	SOX11, PAX6, TWIST2	1008	4	11126	8.27827	1	0.869457	55.7147
GOTERM_BP_DIRECT	GO:0015711~organic anion transport	3	0.00182977	0.0433914	SLCO4A1, SLC22A7, SLCO3A1	1008	4	11126	8.27827	1	0.869457	55.7147
GOTERM_BP_DIRECT	GO:0006564~L-serine biosynthetic process	3	0.00182977	0.0433914	SHMT2, PSPH, PSAT1	1008	4	11126	8.27827	1	0.869457	55.7147
GOTERM_BP_DIRECT	GO:0009649~entrainment of circadian clock	3	0.00182977	0.0433914	ID2, BHLHE40, BHLHE41	1008	4	11126	8.27827	1	0.869457	55.7147
GOTERM_BP_DIRECT	GO:0042270~protection from natural killer cell mediated cytotoxicity	3	0.00182977	0.0433914	TAP2, TAP1, H2-T23	1008	4	11126	8.27827	1	0.869457	55.7147
GOTERM_BP_DIRECT	GO:0070633~transepithelial transport	3	0.00182977	0.0433914	PRSS8, SLC26A6, CXADR	1008	4	11126	8.27827	1	0.869457	55.7147
GOTERM_BP_DIRECT	GO:0002544~chronic inflammatory response	3	0.00182977	0.0433914	PTGES, VNN1, THBS1	1008	4	11126	8.27827	1	0.869457	55.7147
INTERPRO	IPR004074:Interleukin-1 receptor, type I/II	3	0.00182977	0.0442645	IL1R2, IL18RAP, IL1RAP	1105	4	12069	8.19163	1	0.634639	53.0889
INTERPRO	IPR006888:Cor1/Xlr/Xmr family	3	0.00182977	0.0442645	XLR3C, XLR3A, XLR5A	1105	4	12069	8.19163	1	0.634639	53.0889
INTERPRO	IPR003529:Long hematopoietin receptor, Gp130 family 2, conserved site	3	0.00182977	0.0442645	OSMR, LEPR, LIFR	1105	4	12069	8.19163	1	0.634639	53.0889
INTERPRO	IPR022067:Homeobox protein Hox1A3 N-terminal	3	0.00182977	0.0442645	HOXC13, HOXB13, HOXD13	1105	4	12069	8.19163	1	0.634639	53.0889
INTERPRO	IPR026052:DNA-binding protein inhibitor	3	0.00182977	0.0442645	ID2, ID1, ID3	1105	4	12069	8.19163	1	0.634639	53.0889
INTERPRO	IPR004156:Organic anion transporter polypeptide OATP	3	0.00182977	0.0442645	SLCO4A1, SLCO3A1, SLCO5A1	1105	4	12069	8.19163	1	0.634639	53.0889
GOTERM_BP_DIRECT	GO:0043524~negative regulation of neuron apoptotic process	18	0.0109786	0.0448774	STAMBP, XRCC4, STAR, GABRB3, AXL, TGFB3, NR4A3, CITED1, KDR, SCT, CORO1A, JUN, HIPK2, MT1, EPOR, AGAP2, NEFL, FAIM2	1008	121	11126	1.64197	1	0.875161	56.9609
GOTERM_MF_DIRECT	GO:0004908~interleukin-1 receptor activity	3	0.00182977	0.0450426	IL1R2, IL18RAP, IL1RAP	991	4	10722	8.11453	1	0.714856	52.1021
GOTERM_MF_DIRECT	GO:0015347~sodium-independent organic anion transmembrane transporter activity	3	0.00182977	0.0450426	SLCO4A1, SLCO3A1, SLCO5A1	991	4	10722	8.11453	1	0.714856	52.1021
GOTERM_MF_DIRECT	GO:0004704~NF-kappaB-inducing kinase activity	3	0.00182977	0.0450426	IKBKE, RIPK3, MAP3K14	991	4	10722	8.11453	1	0.714856	52.1021
GOTERM_MF_DIRECT	GO:0004740~pyruvate dehydrogenase (acetyl-transferring) kinase activity	3	0.00182977	0.0450426	PDK2, PDK3, PDK4	991	4	10722	8.11453	1	0.714856	52.1021
GOTERM_MF_DIRECT	GO:0005249~voltage-gated potassium channel activity	7	0.00426946	0.0459157	KCNS3, HCN2, KCNC4, KCNAB3, CNGA3, KCNQ2, KCNH3	991	29	10722	2.61157	1	0.713052	52.7967
GOTERM_MF_DIRECT	GO:0004175~endopeptidase activity	12	0.00731908	0.0459852	GZMM, ADAMTS9, REN1, ADAMTS20, APH1C, ADAMTS15, BACE1, APH1B, HTRA3, RHBDD1, PSMB8, PSMB9	991	68	10722	1.9093	1	0.704952	52.8516
GOTERM_BP_DIRECT	GO:0006909~phagocytosis	9	0.00548931	0.0466398	GATA2, CORO1A, UNC13D, LEPR, AXL, ANXA1, MERTK, CD302, ANXA3	1008	45	11126	2.20754	1	0.882036	58.396
GOTERM_BP_DIRECT	GO:0010033~response to organic substance	9	0.00548931	0.0466398	GATM, REN1, AQP9, P2RX3, SPR, CTSC, PAK1, ABCG1, KLF4	1008	45	11126	2.20754	1	0.882036	58.396
GOTERM_BP_DIRECT	GO:0048812~neuron projection morphogenesis	10	0.00609923	0.0466479	NBL1, SGK1, KLK8, UGT8A, DMD, ITGA1, LIFR, PAK1, NEFL, KDR	1008	53	11126	2.08258	1	0.878927	58.4024
GOTERM_BP_DIRECT	GO:0034097~response to cytokine	10	0.00609923	0.0466479	STAT6, CORO1A, PTGES, OSMR, JUN, LIFR, ACP5, TMEM102, PDX1, CITED1	1008	53	11126	2.08258	1	0.878927	58.4024
UP_SEQ_FEATURE	domain:C-type lectin	5	0.00304962	0.0480267	THBD, OLR1, KLRG2, ACAN, CD302	1032	16	11563	3.50139	1	0.879534	58.0928
UP_SEQ_FEATURE	repeat:LRR 11	9	0.00548931	0.0484884	VASN, LRRC8E, LINGO1, SLITRK4, PODN, LRRC8B, LRRC8D, TLR5, LRRC9	1032	46	11563	2.19218	1	0.877743	58.4505
INTERPRO	IPR000219:Dbl homology (DH) domain	11	0.00670916	0.048785	FGD2, OBSCN, NGEF, PLEKHG1, ARHGEF26, ARHGEF6, PLEKHG6, ARHGEF16, FGD3, FGD4, FARP2	1105	61	12069	1.96957	1	0.666082	56.6636
GOTERM_BP_DIRECT	GO:0007628~adult walking behavior	7	0.00426946	0.0489474	EPHA4, DAB1, HEXA, HIPK2, CNTN2, GBX1, CACNA1C	1008	30	11126	2.57546	1	0.8882	60.2066
GOTERM_BP_DIRECT	GO:0046777~protein autophosphorylation	22	0.0134183	0.0500599	MAK, TAOK3, MET, PHKA1, WNK2, KIT, ALK, EPHA1, KDR, PRKD1, EPHA4, EPHA8, MAP3K9, AAK1, PTK6, PDGFRA, RIPK3, PDGFRB, TNK1, PAK1, JAK3, CSF1R	1008	159	11126	1.52723	1	0.890861	61.0526
GOTERM_BP_DIRECT	GO:0086091~regulation of heart rate by cardiac conduction	5	0.00304962	0.0503143	PKP2, CACNA1G, DSP, CACNA1C, SCN5A	1008	16	11126	3.44928	1	0.889216	61.2437
GOTERM_BP_DIRECT	GO:0022409~positive regulation of cell-cell adhesion	5	0.00304962	0.0503143	RAP1GAP, MEX3B, L1CAM, TBX18, CITED2	1008	16	11126	3.44928	1	0.889216	61.2437
GOTERM_BP_DIRECT	GO:0060749~mammary gland alveolus development	5	0.00304962	0.0503143	TNFSF11, PRLR, ID2, TGFA, AGAP2	1008	16	11126	3.44928	1	0.889216	61.2437
GOTERM_BP_DIRECT	GO:0006816~calcium ion transport	13	0.007929	0.0509806	SLC8A2, TRPV2, VDR, CORO1A, BSPRY, SLC24A3, RYR1, CHRNA4, TRPV4, RYR2, CACNA1C, CDH23, CACNA1B	1008	79	11126	1.81633	1	0.889622	61.7399
INTERPRO	IPR016187:C-type lectin fold	7	0.00426946	0.0511355	MRC1, THBD, OLR1, KLRG2, ACAN, SUSD5, CD302	1105	30	12069	2.54851	1	0.678691	58.4197
INTERPRO	IPR017871:ABC transporter, conserved site	7	0.00426946	0.0511355	ABCB1B, TAP2, TAP1, ABCA1, ABCA3, ABCG4, ABCG1	1105	30	12069	2.54851	1	0.678691	58.4197
GOTERM_BP_DIRECT	GO:0034446~substrate adhesion-dependent cell spreading	8	0.00487939	0.0515085	SFRP1, ITGA8, AXL, ANTXR1, MERTK, EPHA1, FZD7, FN1	1008	38	11126	2.32373	1	0.88935	62.1288
UP_SEQ_FEATURE	repeat:Annexin 1	4	0.00243969	0.0527104	ANXA8, ANXA1, ANXA4, ANXA3	1032	10	11563	4.48178	1	0.894824	61.5905
UP_SEQ_FEATURE	region of interest:Alpha-1	4	0.00243969	0.0527104	H2-K1, H2-D1, H2-T23, H2-DMA	1032	10	11563	4.48178	1	0.894824	61.5905
UP_SEQ_FEATURE	region of interest:Alpha-2	4	0.00243969	0.0527104	H2-K1, H2-D1, H2-T23, H2-DMA	1032	10	11563	4.48178	1	0.894824	61.5905
UP_SEQ_FEATURE	repeat:Annexin 2	4	0.00243969	0.0527104	ANXA8, ANXA1, ANXA4, ANXA3	1032	10	11563	4.48178	1	0.894824	61.5905
UP_SEQ_FEATURE	repeat:Annexin 4	4	0.00243969	0.0527104	ANXA8, ANXA1, ANXA4, ANXA3	1032	10	11563	4.48178	1	0.894824	61.5905
UP_SEQ_FEATURE	repeat:Annexin 3	4	0.00243969	0.0527104	ANXA8, ANXA1, ANXA4, ANXA3	1032	10	11563	4.48178	1	0.894824	61.5905
GOTERM_MF_DIRECT	GO:0005516~calmodulin binding	20	0.0121985	0.053173	OBSCN, ADCY1, SLC8A2, PHKA1, RRAD, CAMKK1, SNTB1, RYR1, IQCG, RYR2, TRPV4, MARCKS, NOS3, MYH14, NOS2, KCNQ2, CACNA1C, SCN5A, CEACAM1, ADD2	991	139	10722	1.55674	1	0.749366	58.216
GOTERM_MF_DIRECT	GO:0008201~heparin binding	13	0.007929	0.0532077	APP, ADAMTS8, SFRP1, ADAMTS15, LIPG, LIPH, TMEM184A, COL25A1, ADAMTS1, THBS1, GREM2, COL5A1, FN1	991	78	10722	1.80323	1	0.741593	58.2405
INTERPRO	IPR020894:Cadherin conserved site	6	0.00365954	0.0532463	CDH22, CELSR3, CDH3, CDH4, CDH5, CDH23	1105	23	12069	2.84926	1	0.688865	59.9393
GOTERM_MF_DIRECT	GO:0031683~G-protein beta/gamma-subunit complex binding	5	0.00304962	0.0535194	GNAZ, GNAL, GNA15, GNAI1, ADORA1	991	16	10722	3.38105	1	0.735818	58.4595
GOTERM_BP_DIRECT	GO:0050918~positive chemotaxis	4	0.00243969	0.0547285	SEMA5A, CORO1A, LGALS3, MET	1008	10	11126	4.41508	1	0.901334	64.4212
GOTERM_BP_DIRECT	GO:0048103~somatic stem cell division	4	0.00243969	0.0547285	BMI1, KIT, WNT7A, FZD7	1008	10	11126	4.41508	1	0.901334	64.4212
GOTERM_BP_DIRECT	GO:1990440~positive regulation of transcription from RNA polymerase II promoter in response to endoplasmic reticulum stress	4	0.00243969	0.0547285	ATF4, CREB3L1, CREB3L3, DDIT3	1008	10	11126	4.41508	1	0.901334	64.4212
GOTERM_MF_DIRECT	GO:0043548~phosphatidylinositol 3-kinase binding	6	0.00365954	0.0550417	CORO1A, DAB1, MET, AXL, PDGFRA, PDGFRB	991	23	10722	2.82245	1	0.738229	59.5139
GOTERM_MF_DIRECT	GO:0070888~E-box binding	6	0.00365954	0.0550417	ASCL2, ATOH8, BHLHE40, ZEB1, BHLHE41, AHR	991	23	10722	2.82245	1	0.738229	59.5139
INTERPRO	IPR001464:Annexin	4	0.00243969	0.0562099	ANXA8, ANXA1, ANXA4, ANXA3	1105	10	12069	4.36887	1	0.704169	61.985
INTERPRO	IPR000585:Hemopexin-like domain	4	0.00243969	0.0562099	MMP28, MMP14, MMP12, MMP24	1105	10	12069	4.36887	1	0.704169	61.985
INTERPRO	IPR018252:Annexin repeat, conserved site	4	0.00243969	0.0562099	ANXA8, ANXA1, ANXA4, ANXA3	1105	10	12069	4.36887	1	0.704169	61.985
INTERPRO	IPR018487:Hemopexin-like repeats	4	0.00243969	0.0562099	MMP28, MMP14, MMP12, MMP24	1105	10	12069	4.36887	1	0.704169	61.985
INTERPRO	IPR018502:Annexin repeat	4	0.00243969	0.0562099	ANXA8, ANXA1, ANXA4, ANXA3	1105	10	12069	4.36887	1	0.704169	61.985
GOTERM_BP_DIRECT	GO:0051965~positive regulation of synapse assembly	7	0.00426946	0.0562376	SLITRK4, AMIGO3, CLSTN3, IL1RAP, EFNA5, TPBG, WNT7A	1008	31	11126	2.49238	1	0.905078	65.4498
GOTERM_MF_DIRECT	GO:0004812~aminoacyl-tRNA ligase activity	8	0.00487939	0.0563052	IARS, WARS, CARS, NARS, SARS, LARS, EARS2, MARS	991	38	10722	2.27776	1	0.738879	60.3699
GOTERM_BP_DIRECT	GO:0006955~immune response	14	0.00853893	0.0566275	H2-K1, CEBPG, ENDOU, OAS3, H2-D1, MYLPF, TNFRSF9, TNFRSF1A, TNFSF11, OTUD7A, THBS1, H2-DMA, MAP3K14, BMP6	1008	89	11126	1.73627	1	0.904139	65.7109
GOTERM_MF_DIRECT	GO:0004713~protein tyrosine kinase activity	15	0.00914885	0.0570287	MET, AXL, KIT, ALK, EPHA1, KDR, EPHA4, EPHA8, PTK6, PDGFRA, PDGFRB, TNK1, JAK3, MERTK, CSF1R	991	96	10722	1.69053	1	0.736103	60.8523
INTERPRO	IPR011993:Pleckstrin homology-like domain	43	0.0262267	0.0573358	FGD2, RALGPS1, ARHGEF26, FERMT1, ASAP3, APBB1IP, PLCL2, RASAL1, ARHGAP20, PLEKHG1, DAB1, DAPP1, GAB2, PLEKHG6, SNTB1, AGAP2, RASA4, IQSEC1, PHLDA2, FGD3, MTMR4, FGD4, OBSCN, NGEF, CNKSR1, ARHGEF6, PTPN4, ARHGEF16, DGKK, PSD4, DGKH, FARP2, PRKD1, TNS4, PLEKHA3, DOK2, PLEKHA6, PLEKHH2, OPHN1, FAM43B, JAK3, GRB7, PHLDB2	1105	359	12069	1.30823	1	0.706753	62.7362
GOTERM_MF_DIRECT	GO:0031402~sodium ion binding	4	0.00243969	0.0575308	ATP1B1, SLC24A3, SLC24A1, SLC34A2	991	10	10722	4.32775	1	0.732021	61.184
GOTERM_BP_DIRECT	GO:0050679~positive regulation of epithelial cell proliferation	9	0.00548931	0.0581081	SFRP1, ID1, GRN, TGFA, NR4A3, TBX18, SCN5A, BMP6, KDR	1008	47	11126	2.1136	1	0.907569	66.6857
UP_SEQ_FEATURE	domain:FZ	5	0.00304962	0.0585227	SFRP1, ROR1, FZD3, FZD5, FZD7	1032	17	11563	3.29543	1	0.915216	65.5486
INTERPRO	IPR003439:ABC transporter-like	7	0.00426946	0.0587038	ABCB1B, TAP2, TAP1, ABCA1, ABCA3, ABCG4, ABCG1	1105	31	12069	2.4663	1	0.710787	63.6301
UP_SEQ_FEATURE	domain:PDZ	13	0.007929	0.0589304	PRX, MPP2, RHPN1, RHPN2, PTPN4, PDLIM4, GIPC3, RIMS2, SHANK2, MAST1, SNTB1, HTRA3, PDZD4	1032	82	11563	1.77632	1	0.913353	65.8113
GOTERM_BP_DIRECT	GO:0045087~innate immune response	25	0.0152481	0.0589382	APOBEC3, IRGM1, LGALS3, IFITM2, AXL, ANXA1, OAS3, TLR5, TRIM62, AIM2, MID2, ISG20, PRKD1, C1RA, CYBA, APP, TMEM173, PTK6, IL1RAP, VNN1, TNK1, PRDM1, JAK3, OAS1A, CSF1R	1008	190	11126	1.45233	1	0.908352	67.2207
GOTERM_BP_DIRECT	GO:0030316~osteoclast differentiation	6	0.00365954	0.0600846	TNFSF11, GAB2, TFRC, MITF, CSF1R, FARP2	1008	24	11126	2.75942	1	0.910298	67.9462
GOTERM_BP_DIRECT	GO:0002479~antigen processing and presentation of exogenous peptide antigen via MHC class I, TAP-dependent	6	0.00365954	0.0600846	H2-K1, H2-D1, H2-T23, PSMB8, TAPBP, PSMB9	1008	24	11126	2.75942	1	0.910298	67.9462
GOTERM_BP_DIRECT	GO:0043087~regulation of GTPase activity	11	0.00670916	0.0605245	RASAL1, EPHA4, NGEF, PROM2, RAP1GAP, CHN1, EFNA5, DGKI, ARHGAP8, RASA4, EPHA1	1008	64	11126	1.8971	1	0.909586	68.2205
INTERPRO	IPR002347:Glucose/ribitol dehydrogenase	8	0.00487939	0.0608913	DHRS3, HSD17B2, HSD17B14, HSD17B1, SPR, CBR3, HPGD, BDH1	1105	39	12069	2.24045	1	0.719669	65.0176
GOTERM_BP_DIRECT	GO:0016477~cell migration	22	0.0134183	0.0622386	ERG, APC2, NANOS1, EFNB2, ASAP3, PAX3, MMP14, SIRPA, COL5A1, SDC3, KDR, CORO1A, S1PR1, GAB2, PTK6, ST14, PDGFRA, PDGFRB, JAK3, THBS1, NFATC2, LCP1	1008	163	11126	1.48975	1	0.913476	69.2684
GOTERM_MF_DIRECT	GO:0004872~receptor activity	13	0.007929	0.0624598	MRC1, CADM4, CADM1, RTN4RL1, GRIK3, ITGB4, CD40, TLR5, TNFRSF9, AMOT, ANTXR1, GFRA4, CD200	991	80	10722	1.75815	1	0.754563	64.3023
INTERPRO	IPR001611:Leucine-rich repeat	19	0.0115885	0.0627658	LRRC8E, VASN, PODN, RTN4RL1, LRRC8B, LRRC32, NXF7, LRRC8D, LRRCC1, TLR5, TPBG, LINGO1, AMIGO3, SLITRK4, LRRC56, LRRC9, LRRC61, LRRC51, LRFN2	1105	134	12069	1.54867	1	0.726272	66.1668
INTERPRO	IPR020067:Frizzled domain	5	0.00304962	0.0632595	SFRP1, ROR1, FZD3, FZD5, FZD7	1105	17	12069	3.2124	1	0.724681	66.4636
GOTERM_BP_DIRECT	GO:0007283~spermatogenesis	33	0.0201275	0.0633808	TEX19.1, RBP4, CADM1, HOXA11, ADCYAP1R1, GGT1, KIT, SYCP1, TAF7L, GLI1, MEI4, HSPA2, TDRKH, HOXA10, HSF2BP, H2AFX, PCYT1B, CHD5, CNTD1, AXL, AK7, RHBDD1, CLGN, TEX15, MYCBPAP, IQCG, BRDT, GAMT, CALR3, PRSS42, DMC1, MERTK, KATNAL1	1008	268	11126	1.35912	1	0.915204	69.9485
UP_SEQ_FEATURE	domain:EGF-like 12	3	0.00182977	0.0662124	TNC, JAG1, MEGF6	1032	5	11563	6.72267	1	0.933837	70.1964
UP_SEQ_FEATURE	region of interest:Coil 2B	3	0.00182977	0.0662124	NEFH, NEFL, NEFM	1032	5	11563	6.72267	1	0.933837	70.1964
UP_SEQ_FEATURE	region of interest:Coil 2A	3	0.00182977	0.0662124	NEFH, NEFL, NEFM	1032	5	11563	6.72267	1	0.933837	70.1964
UP_SEQ_FEATURE	domain:Histidine kinase	3	0.00182977	0.0662124	PDK2, PDK3, PDK4	1032	5	11563	6.72267	1	0.933837	70.1964
UP_SEQ_FEATURE	domain:TSP type-1 7	3	0.00182977	0.0662124	SEMA5A, SEMA5B, ADAMTS20	1032	5	11563	6.72267	1	0.933837	70.1964
UP_SEQ_FEATURE	domain:Fibrillar collagen NC1	3	0.00182977	0.0662124	COL27A1, COL11A2, COL5A1	1032	5	11563	6.72267	1	0.933837	70.1964
UP_SEQ_FEATURE	region of interest:Interaction with calmodulin	3	0.00182977	0.0662124	ADCY1, TRPV4, ADD2	1032	5	11563	6.72267	1	0.933837	70.1964
INTERPRO	IPR000315:Zinc finger, B-box	9	0.00548931	0.0677943	TRIM46, BSPRY, TRIM54, TRIM17, TRIM29, RNF207, MID1, TRIM62, MID2	1105	48	12069	2.04791	1	0.745512	69.0769
UP_SEQ_FEATURE	domain:EGF-like 1; calcium-binding	4	0.00243969	0.0678093	SCUBE3, SCUBE1, CELSR3, MEGF6	1032	11	11563	4.07435	1	0.935472	71.0843
UP_SEQ_FEATURE	region of interest:Linker 2	4	0.00243969	0.0678093	SYNC, NEFH, NEFL, NEFM	1032	11	11563	4.07435	1	0.935472	71.0843
UP_SEQ_FEATURE	domain:PSI	4	0.00243969	0.0678093	SEMA6D, SEMA4F, PLXDC2, ITGB4	1032	11	11563	4.07435	1	0.935472	71.0843
GOTERM_BP_DIRECT	GO:0032020~ISG15-protein conjugation	3	0.00182977	0.0680329	ISG15, UBE2L6, UBE2E1	1008	5	11126	6.62262	1	0.92774	72.5741
GOTERM_BP_DIRECT	GO:0043252~sodium-independent organic anion transport	3	0.00182977	0.0680329	SLCO4A1, SLCO3A1, SLCO5A1	1008	5	11126	6.62262	1	0.92774	72.5741
GOTERM_BP_DIRECT	GO:0019885~antigen processing and presentation of endogenous peptide antigen via MHC class I	3	0.00182977	0.0680329	TAP2, TAP1, TAPBP	1008	5	11126	6.62262	1	0.92774	72.5741
GOTERM_BP_DIRECT	GO:0031638~zymogen activation	3	0.00182977	0.0680329	GGT1, MMP14, PRSS12	1008	5	11126	6.62262	1	0.92774	72.5741
GOTERM_BP_DIRECT	GO:0045124~regulation of bone resorption	3	0.00182977	0.0680329	S1PR1, PDK4, CSF1R	1008	5	11126	6.62262	1	0.92774	72.5741
GOTERM_BP_DIRECT	GO:2001028~positive regulation of endothelial cell chemotaxis	3	0.00182977	0.0680329	PRKD1, SEMA5A, MET	1008	5	11126	6.62262	1	0.92774	72.5741
GOTERM_BP_DIRECT	GO:0009992~cellular water homeostasis	3	0.00182977	0.0680329	AQP9, SLC6A12, AQP3	1008	5	11126	6.62262	1	0.92774	72.5741
GOTERM_BP_DIRECT	GO:0035988~chondrocyte proliferation	3	0.00182977	0.0680329	GRN, STC1, MMP14	1008	5	11126	6.62262	1	0.92774	72.5741
GOTERM_BP_DIRECT	GO:0060527~prostate epithelial cord arborization involved in prostate glandular acinus morphogenesis	3	0.00182977	0.0680329	SFRP1, HOXB13, HOXD13	1008	5	11126	6.62262	1	0.92774	72.5741
GOTERM_BP_DIRECT	GO:2000651~positive regulation of sodium ion transmembrane transporter activity	3	0.00182977	0.0680329	ANK3, DMD, WNK2	1008	5	11126	6.62262	1	0.92774	72.5741
GOTERM_BP_DIRECT	GO:1902041~regulation of extrinsic apoptotic signaling pathway via death domain receptors	3	0.00182977	0.0680329	TMC8, LGALS3, MADD	1008	5	11126	6.62262	1	0.92774	72.5741
GOTERM_BP_DIRECT	GO:0002438~acute inflammatory response to antigenic stimulus	3	0.00182977	0.0680329	ICAM1, CXCR2, CD6	1008	5	11126	6.62262	1	0.92774	72.5741
GOTERM_BP_DIRECT	GO:0043303~mast cell degranulation	3	0.00182977	0.0680329	CPLX2, NR4A3, KIT	1008	5	11126	6.62262	1	0.92774	72.5741
GOTERM_BP_DIRECT	GO:0035634~response to stilbenoid	3	0.00182977	0.0680329	USP18, SLC22A7, SAA3	1008	5	11126	6.62262	1	0.92774	72.5741
GOTERM_BP_DIRECT	GO:0009247~glycolipid biosynthetic process	3	0.00182977	0.0680329	GAL3ST3, UGT8A, GBGT1	1008	5	11126	6.62262	1	0.92774	72.5741
GOTERM_BP_DIRECT	GO:0071625~vocalization behavior	3	0.00182977	0.0680329	MYH14, SHANK1, SHANK2	1008	5	11126	6.62262	1	0.92774	72.5741
GOTERM_BP_DIRECT	GO:0002591~positive regulation of antigen processing and presentation of peptide antigen via MHC class I	3	0.00182977	0.0680329	ABCB1B, TAP2, TAP1	1008	5	11126	6.62262	1	0.92774	72.5741
GOTERM_BP_DIRECT	GO:0048841~regulation of axon extension involved in axon guidance	3	0.00182977	0.0680329	PLXNC1, PLXNA2, PLXND1	1008	5	11126	6.62262	1	0.92774	72.5741
INTERPRO	IPR005467:Signal transduction histidine kinase, core	3	0.00182977	0.0693553	PDK2, PDK3, PDK4	1105	5	12069	6.5533	1	0.749447	69.9314
INTERPRO	IPR011778:Hydantoinase/dihydropyrimidinase	3	0.00182977	0.0693553	DPYSL5, DPYSL4, DPYSL3	1105	5	12069	6.5533	1	0.749447	69.9314
INTERPRO	IPR004837:Sodium/calcium exchanger membrane region	3	0.00182977	0.0693553	SLC8A2, SLC24A3, SLC24A1	1105	5	12069	6.5533	1	0.749447	69.9314
INTERPRO	IPR018955:Branched-chain alpha-ketoacid dehydrogenase kinase/Pyruvate dehydrogenase kinase, N-terminal	3	0.00182977	0.0693553	PDK2, PDK3, PDK4	1105	5	12069	6.5533	1	0.749447	69.9314
INTERPRO	IPR021040:Leucine-rich repeat-containing protein 8, N-terminal	3	0.00182977	0.0693553	LRRC8E, LRRC8B, LRRC8D	1105	5	12069	6.5533	1	0.749447	69.9314
INTERPRO	IPR002077:Voltage-dependent calcium channel, alpha-1 subunit	3	0.00182977	0.0693553	CACNA1G, CACNA1C, CACNA1B	1105	5	12069	6.5533	1	0.749447	69.9314
GOTERM_MF_DIRECT	GO:0016705~oxidoreductase activity, acting on paired donors, with incorporation or reduction of molecular oxygen	7	0.00426946	0.0693679	CYP11A1, P4HA2, CYP4F17, CYP2S1, CYP21A1, CYP4F13, CYP26A1	991	32	10722	2.36674	1	0.784564	68.2793
GOTERM_BP_DIRECT	GO:0071345~cellular response to cytokine stimulus	6	0.00365954	0.0697459	SOCS1, DPYSL3, NOS2, JAK3, IL17RA, CSF1R	1008	25	11126	2.64905	1	0.93063	73.4851
GOTERM_BP_DIRECT	GO:0045071~negative regulation of viral genome replication	6	0.00365954	0.0697459	APOBEC3, ISG15, IFITM2, FAM111A, OAS3, ISG20	1008	25	11126	2.64905	1	0.93063	73.4851
INTERPRO	IPR003591:Leucine-rich repeat, typical subtype	14	0.00853893	0.0701058	VASN, LRRC8E, PODN, RTN4RL1, LRRC8B, LRRC32, LRRC8D, TLR5, TPBG, LINGO1, SLITRK4, AMIGO3, LRRC9, LRFN2	1105	91	12069	1.68033	1	0.749114	70.3342
INTERPRO	IPR000719:Protein kinase, catalytic domain	48	0.0292763	0.0702082	CDK18, ACVRL1, STK36, TRIB3, KIT, CAMKK1, EPHB6, TTBK1, AAK1, WNK4, PTK6, MAP3K9, MLKL, PAK1, DCLK1, CSF1R, GUCY2G, OBSCN, SGK1, MAK, MET, TAOK3, AXL, PRKCH, NPR2, WNK2, ALK, EPHA1, KDR, PRKD1, RPS6KA6, EPHA4, IKBKE, MAST1, MAPK13, EPHA8, RPS6KA2, HIPK2, PDGFRA, ROR1, RIPK3, BMP2K, PDGFRB, NRK, TNK1, JAK3, MERTK, MAP3K14	1105	414	12069	1.26634	1	0.745477	70.3888
GOTERM_BP_DIRECT	GO:0051639~actin filament network formation	4	0.00243969	0.0703356	COBLL1, FHOD3, PLS1, LCP1	1008	11	11126	4.01371	1	0.930348	73.792
GOTERM_BP_DIRECT	GO:0051492~regulation of stress fiber assembly	4	0.00243969	0.0703356	PTGER4, ALMS1, ASAP3, TTC8	1008	11	11126	4.01371	1	0.930348	73.792
GOTERM_MF_DIRECT	GO:0030368~interleukin-17 receptor activity	3	0.00182977	0.0705338	IL17RE, IL17RC, IL17RA	991	5	10722	6.49162	1	0.783859	68.9081
GOTERM_BP_DIRECT	GO:0010628~positive regulation of gene expression	32	0.0195176	0.0706054	STAR, LRRC32, TNC, MITF, VIM, TGFB3, PAX6, KIT, RIMS2, HMGN5, CDH3, CITED1, CITED2, TNFRSF1A, VDR, ANK3, TRPV4, NFATC2, FN1, HPN, TESC, PTGER4, SOX11, MET, RNF207, ATF4, ID2, ID1, RPS6KA2, PRDM1, WNT7A, KLF4	1008	261	11126	1.35328	1	0.929195	73.9313
GOTERM_MF_DIRECT	GO:0005262~calcium channel activity	8	0.00487939	0.0710096	SLC24A3, TRPV2, SLC24A1, RYR1, RYR2, TRPV4, CACNA1C, CACNA1B	991	40	10722	2.16387	1	0.779849	69.1614
GOTERM_CC_DIRECT	GO:0030315~T-tubule	8	0.00487939	0.0718136	VDR, SLC2A4, ANK3, TGFB3, RYR1, AKAP7, CACNA1C, SCN5A	1073	41	11880	2.16034	1	0.546269	65.8992
INTERPRO	IPR001818:Peptidase M10, metallopeptidase	4	0.00243969	0.0721868	MMP28, MMP14, MMP12, MMP24	1105	11	12069	3.9717	1	0.751383	71.4248
INTERPRO	IPR021190:Peptidase M10A	4	0.00243969	0.0721868	MMP28, MMP14, MMP12, MMP24	1105	11	12069	3.9717	1	0.751383	71.4248
INTERPRO	IPR025660:Cysteine peptidase, histidine active site	4	0.00243969	0.0721868	CTSJ, CTSO, CTSR, CTSC	1105	11	12069	3.9717	1	0.751383	71.4248
INTERPRO	IPR002870:Peptidase M12B, propeptide	6	0.00365954	0.0723695	ADAMTS9, ADAMTS8, ADAMTS20, ADAM23, ADAMTS15, ADAMTS1	1105	25	12069	2.62132	1	0.748238	71.5188
INTERPRO	IPR001590:Peptidase M12B, ADAM/reprolysin	6	0.00365954	0.0723695	ADAMTS9, ADAMTS8, ADAMTS20, ADAM23, ADAMTS15, ADAMTS1	1105	25	12069	2.62132	1	0.748238	71.5188
GOTERM_BP_DIRECT	GO:0010595~positive regulation of endothelial cell migration	7	0.00426946	0.0726723	PRKD1, ETS1, ATOH8, THBS1, WNT7A, ANXA3, KDR	1008	33	11126	2.34133	1	0.932865	74.9755
GOTERM_BP_DIRECT	GO:0001541~ovarian follicle development	8	0.00487939	0.0727238	ICAM1, KIT, PCYT1B, MMP14, DMC1, KITL, AHR, KDR	1008	41	11126	2.1537	1	0.931181	75.001
GOTERM_MF_DIRECT	GO:0017154~semaphorin receptor activity	4	0.00243969	0.0738374	PLXNC1, PLXNA2, MET, PLXND1	991	11	10722	3.93432	1	0.787092	70.6269
GOTERM_MF_DIRECT	GO:0008307~structural constituent of muscle	4	0.00243969	0.0738374	KRT19, DMD, MYLPF, JPH1	991	11	10722	3.93432	1	0.787092	70.6269
INTERPRO	IPR009030:Insulin-like growth factor binding protein, N-terminal	13	0.007929	0.0741242	HMCN2, THBD, SCUBE3, SCUBE1, SUSD1, IGFBP6, NID2, HTRA3, JAG1, IGFBP2, MEGF6, EPHA1, VLDLR	1105	83	12069	1.7107	1	0.752855	72.4062
GOTERM_MF_DIRECT	GO:0046875~ephrin receptor binding	6	0.00365954	0.074711	EPHA4, NGEF, EFNB1, EFNB2, CHN1, EFNA5	991	25	10722	2.59665	1	0.785072	71.0663
GOTERM_BP_DIRECT	GO:0045944~positive regulation of transcription from RNA polymerase II promoter	81	0.0494038	0.0749204	HMGN3, ELF1, ACVRL1, LMO1, EVX1, ELF3, PPARG, TBX20, MITF, PAX6, TGFB3, HOXD13, PAX3, PDX1, ZEB1, JAG1, ZIC3, GLI1, CITED2, GATA2, TMEM173, APP, S1PR1, CREB3L1, CREB3L3, AGAP2, SSBP4, SSBP2, FOXJ2, FOXJ1, NKX2-9, SOX11, MLXIPL, SIX5, CD40, DDIT3, LPIN3, PRKD1, HOXC13, JUN, HIPK2, SMARCA2, PEG3, GLIS3, NDN, ABLIM3, TFR2, TAF9B, GLIS1, SOX4, NR3C1, STAT6, VDR, T, TNFRSF1A, LHX2, POU2F3, HOXA7, HOXA…	1008	756	11126	1.18261	1	0.934994	76.0662
GOTERM_BP_DIRECT	GO:0006814~sodium ion transport	10	0.00609923	0.0752691	HCN2, SLC38A4, ATP1B1, SLC23A1, SLC8A2, SLC24A3, SLC20A2, SCNN1A, SCN5A, SLC34A2	1008	58	11126	1.90305	1	0.934115	76.2314
INTERPRO	IPR011162:MHC classes I/II-like antigen recognition protein	5	0.00304962	0.075675	H2-K1, H2-D1, H2-T23, H2-T24, H2-DMA	1105	18	12069	3.03394	1	0.756339	73.1688
UP_SEQ_FEATURE	repeat:LRR 12	8	0.00487939	0.0758583	LRRC8E, LINGO1, SLITRK4, PODN, LRRC8B, LRRC8D, TLR5, LRRC9	1032	42	11563	2.13418	1	0.951804	75.1925
UP_SEQ_FEATURE	domain:EGF-like 3; calcium-binding	6	0.00365954	0.0762291	THBD, SCUBE3, SCUBE1, CELSR3, NID2, MEGF6	1032	26	11563	2.58564	1	0.950333	75.3678
GOTERM_BP_DIRECT	GO:0000122~negative regulation of transcription from RNA polymerase II promoter	64	0.0390351	0.0772247	BMI1, LMO1, PPARG, MITF, TBX20, PDX1, ZEB1, PAX3, CITED2, GATA2, TRPV4, BHLHE41, TWIST2, BATF3, HIST1H1C, FOXJ1, SOX11, ZHX1, MLXIPL, ZHX2, VAX2, HES6, AHR, DDIT3, LEFTY1, ASCL2, DACT1, JUN, HIPK2, RIPPLY3, PRDM1, TBX18, PEG3, GLIS3, TAF9B, GLIS1, TRIB3, HIC1, STAT6, VDR, T, NRARP, HOXA7, BHLHE40, BCOR, NFATC2, EPAS1, TRIM29, MET, NR4A3, ATXN1, CDKN1C, DKK1, ID2, ID1, ZBTB4, JAZF1, ID3, ZFHX3, CR…	1008	583	11126	1.21169	1	0.937122	77.1375
GOTERM_CC_DIRECT	GO:0071944~cell periphery	9	0.00548931	0.0773395	KRT19, KRT18, RAC3, PANK1, KRT14, KRT8, EFNA5, CDH5, KDR	1073	50	11880	1.99292	1	0.566625	68.7157
GOTERM_MF_DIRECT	GO:0042813~Wnt-activated receptor activity	5	0.00304962	0.0777735	TSPAN12, SFRP1, FZD3, FZD5, FZD7	991	18	10722	3.00538	1	0.792883	72.5585
GOTERM_BP_DIRECT	GO:0007286~spermatid development	11	0.00670916	0.0778908	HSPA2, XLR3C, XLR3A, IQCG, ALMS1, SIX5, KIT, DMC1, SMARCA2, XLR5A, TAF7L	1008	67	11126	1.81216	1	0.937014	77.4387
GOTERM_CC_DIRECT	GO:0044297~cell body	12	0.00731908	0.0781911	GNAZ, EPHA4, TRPV2, VIM, CACNA1G, DPYSL3, HSPA1B, CXADR, ALK, ENTPD2, ADORA1, DYNLT1B	1073	76	11880	1.74817	1	0.563439	69.13
GOTERM_BP_DIRECT	GO:0000187~activation of MAPK activity	9	0.00548931	0.0783896	MADD, MET, ITGA1, TGFB3, TGFA, ADRA2B, KIT, THBS1, ALK	1008	50	11126	1.98679	1	0.93652	77.6617
GOTERM_BP_DIRECT	GO:0043066~negative regulation of apoptotic process	43	0.0262267	0.0786156	CLDN7, INSL3, TAF9B, MITF, ASNS, CXCR2, HSPA1B, HMGN5, ADORA1, CITED2, TNFRSF1A, CKMT1, TGFA, THBS1, AGAP2, TWIST2, CSF1R, FN1, AIPL1, IL2RB, HPN, SGK1, LGALS3, CRYAB, ADAMTS20, AXL, ALMS1, PROKR1, NR4A3, RHBDD1, KITL, KDR, MUC4, FMN2, PRAMEF12, CD38, ATF5, KRT18, SFRP1, ID1, JUN, PDGFRB, WNT7A	1008	372	11126	1.27586	1	0.935395	77.7621
GOTERM_MF_DIRECT	GO:0005089~Rho guanyl-nucleotide exchange factor activity	11	0.00670916	0.0797546	FGD2, OBSCN, NGEF, PLEKHG1, ARHGEF26, ARHGEF6, PLEKHG6, ARHGEF16, FGD3, FGD4, FARP2	991	66	10722	1.80323	1	0.795652	73.485
UP_SEQ_FEATURE	domain:DH	9	0.00548931	0.0803545	FGD2, OBSCN, NGEF, ARHGEF6, PLEKHG6, ARHGEF16, FGD3, FGD4, FARP2	1032	51	11563	1.97726	1	0.956074	77.2409
UP_SEQ_FEATURE	repeat:LRR 10	9	0.00548931	0.0803545	VASN, LRRC8E, LINGO1, SLITRK4, PODN, LRRC8B, LRRC8D, TLR5, LRRC9	1032	51	11563	1.97726	1	0.956074	77.2409
GOTERM_BP_DIRECT	GO:0003151~outflow tract morphogenesis	8	0.00487939	0.0807897	DHRS3, JUN, SOX11, TBX20, RYR1, THBS1, PLXND1, CITED2	1008	42	11126	2.10242	1	0.938727	78.706
GOTERM_BP_DIRECT	GO:0007517~muscle organ development	8	0.00487939	0.0807897	CRYAB, DMD, MET, PAX3, ID3, JPH1, ZFHX3, TCF15	1008	42	11126	2.10242	1	0.938727	78.706
UP_SEQ_FEATURE	short sequence motif:Cysteine switch	5	0.00304962	0.0828287	ADAMTS15, ADAMTS1, MMP14, MMP12, MMP24	1032	19	11563	2.94854	1	0.958373	78.299
INTERPRO	IPR027359:Voltage-dependent potassium channel, four helix bundle domain	6	0.00365954	0.0831616	KCNS3, KCNC4, CACNA1G, CACNA1C, SCN5A, CACNA1B	1105	26	12069	2.5205	1	0.785704	76.5797
INTERPRO	IPR014729:Rossmann-like alpha/beta/alpha sandwich fold	8	0.00487939	0.0844867	IARS, WARS, CARS, LARS, ASNS, PCYT1B, EARS2, MARS	1105	42	12069	2.08041	1	0.787466	77.1393
UP_SEQ_FEATURE	domain:TSP type-1 5	4	0.00243969	0.0846213	SEMA5A, SEMA5B, ADAMTS20, THSD4	1032	12	11563	3.73482	1	0.959421	79.0364
UP_SEQ_FEATURE	region of interest:Spacer	4	0.00243969	0.0846213	ADAMTS8, ADAMTS20, ADAMTS15, ADAMTS1	1032	12	11563	3.73482	1	0.959421	79.0364
GOTERM_CC_DIRECT	GO:0043005~neuron projection	35	0.0213473	0.0847255	CADM1, STAR, SLC6A2, ADCYAP1R1, VIM, KLC3, NR3C1, CXADR, RIMS2, PSPH, SDC3, ATCAY, APP, DAB1, ANK3, RAC3, NEFL, NEFM, SGK1, MAGI2, KIF5A, SLC6A12, MET, ITGA1, BSN, RGS17, SHANK1, SHANK2, KDR, ATF4, EPHA8, P2RX3, CNTN2, RYR2, CACNA1B	1073	296	11880	1.30916	1	0.586698	72.143
GOTERM_BP_DIRECT	GO:0007140~male meiosis	5	0.00304962	0.0865053	TEX15, HSPA2, TDRKH, DPEP3, BRDT	1008	19	11126	2.90466	1	0.948781	81.0103
GOTERM_BP_DIRECT	GO:0048675~axon extension	5	0.00304962	0.0865053	SEMA5A, SEMA5B, NDN, LHX2, DCLK1	1008	19	11126	2.90466	1	0.948781	81.0103
GOTERM_BP_DIRECT	GO:0016338~calcium-independent cell-cell adhesion via plasma membrane cell-adhesion molecules	4	0.00243969	0.0876879	CLDN7, CLDN9, CADM1, CEACAM1	1008	12	11126	3.67923	1	0.949551	81.4566
GOTERM_BP_DIRECT	GO:0001916~positive regulation of T cell mediated cytotoxicity	4	0.00243969	0.0876879	H2-K1, TAP2, H2-D1, H2-T23	1008	12	11126	3.67923	1	0.949551	81.4566
GOTERM_BP_DIRECT	GO:0071285~cellular response to lithium ion	4	0.00243969	0.0876879	XRCC4, GSTA4, ID2, PPARG	1008	12	11126	3.67923	1	0.949551	81.4566
GOTERM_BP_DIRECT	GO:0001886~endothelial cell morphogenesis	4	0.00243969	0.0876879	ARHGEF26, ID1, MET, STC1	1008	12	11126	3.67923	1	0.949551	81.4566
GOTERM_BP_DIRECT	GO:0019226~transmission of nerve impulse	4	0.00243969	0.0876879	PRX, S1PR1, NFASC, KCNQ2	1008	12	11126	3.67923	1	0.949551	81.4566
GOTERM_MF_DIRECT	GO:0001102~RNA polymerase II activating transcription factor binding	7	0.00426946	0.0882173	T, JUN, HIPK2, TBX20, BHLHE40, BHLHE41, CITED2	991	34	10722	2.22752	1	0.823427	77.1224
GOTERM_CC_DIRECT	GO:0016529~sarcoplasmic reticulum	8	0.00487939	0.0882688	XDH, ANK3, RYR1, RYR2, AKAP7, THBS1, RASD1, JPH1	1073	43	11880	2.05986	1	0.595277	73.66
GOTERM_BP_DIRECT	GO:0031532~actin cytoskeleton reorganization	8	0.00487939	0.089351	S1PR1, ANXA1, TRPV4, PAK1, KIT, ANTXR1, CXADR, FARP2	1008	43	11126	2.05353	1	0.951137	82.0675
GOTERM_BP_DIRECT	GO:0071300~cellular response to retinoic acid	8	0.00487939	0.089351	T, TESC, PTK6, TNC, PPARG, CYP26A1, ABCA1, KLF4	1008	43	11126	2.05353	1	0.951137	82.0675
INTERPRO	IPR018181:Heat shock protein 70, conserved site	4	0.00243969	0.0899312	HSPA2, HSPA4L, HSPA1A, HSPA1B	1105	12	12069	3.64072	1	0.805074	79.309
INTERPRO	IPR006026:Peptidase, metallopeptidase	4	0.00243969	0.0899312	MMP28, MMP14, MMP12, MMP24	1105	12	12069	3.64072	1	0.805074	79.309
INTERPRO	IPR011025:G protein alpha subunit, helical insertion	4	0.00243969	0.0899312	GNAZ, GNAL, GNA15, GNAI1	1105	12	12069	3.64072	1	0.805074	79.309
INTERPRO	IPR001019:Guanine nucleotide binding protein (G-protein), alpha subunit	4	0.00243969	0.0899312	GNAZ, GNAL, GNA15, GNAI1	1105	12	12069	3.64072	1	0.805074	79.309
INTERPRO	IPR013126:Heat shock protein 70 family	4	0.00243969	0.0899312	HSPA2, HSPA4L, HSPA1A, HSPA1B	1105	12	12069	3.64072	1	0.805074	79.309
INTERPRO	IPR000668:Peptidase C1A, papain C-terminal	4	0.00243969	0.0899312	CTSJ, CTSO, CTSR, CTSC	1105	12	12069	3.64072	1	0.805074	79.309
GOTERM_MF_DIRECT	GO:0020037~heme binding	10	0.00609923	0.0903589	CYBA, CYP11A1, CYP4F17, MFSD7C, CYP2S1, CYP21A1, CYP4F13, CYP26A1, NOS3, NOS2	991	59	10722	1.83379	1	0.825884	77.9657
GOTERM_BP_DIRECT	GO:0050890~cognition	6	0.00365954	0.0914587	SLC1A4, GPR155, CHRNA4, DOPEY2, CBR3, ADORA1	1008	27	11126	2.45282	1	0.953386	82.8145
GOTERM_MF_DIRECT	GO:0016849~phosphorus-oxygen lyase activity	4	0.00243969	0.0919311	GUCY2G, CD38, ADCY1, NPR2	991	12	10722	3.60646	1	0.826277	78.5662
GOTERM_BP_DIRECT	GO:0030324~lung development	13	0.007929	0.0919939	RBP4, SLC23A1, CCDC40, LIPA, EPAS1, NKX2-9, PDGFRA, NOS3, MMP14, ZIC3, KDR, GLI1, NFIB	1008	87	11126	1.64931	1	0.95299	82.9994
UP_SEQ_FEATURE	domain:Kringle	3	0.00182977	0.0935652	ROR1, PIK3IP1, PRSS12	1032	6	11563	5.60223	1	0.970109	82.3756
INTERPRO	IPR017907:Zinc finger, RING-type, conserved site	17	0.0103687	0.0950342	BMI1, TRIM17, DTX3L, PDZRN3, RNF207, NHLRC1, MID1, TRIM62, MKRN3, LNX1, MID2, TRIM46, RNF125, TRIM54, RNF208, RNFT2, SH3RF2	1105	123	12069	1.50957	1	0.819833	81.1655
GOTERM_CC_DIRECT	GO:0001533~cornified envelope	3	0.00182977	0.0955473	EVPL, ANXA1, DSP	1073	6	11880	5.53588	1	0.618811	76.5381
GOTERM_BP_DIRECT	GO:0001955~blood vessel maturation	3	0.00182977	0.0960512	S1PR1, DDIT3, CDH5	1008	6	11126	5.51885	1	0.958047	84.3414
GOTERM_BP_DIRECT	GO:0042511~positive regulation of tyrosine phosphorylation of Stat1 protein	3	0.00182977	0.0960512	TNFRSF1A, KIT, CD40	1008	6	11126	5.51885	1	0.958047	84.3414
GOTERM_BP_DIRECT	GO:0097485~neuron projection guidance	3	0.00182977	0.0960512	SEMA5A, SEMA5B, DPYSL4	1008	6	11126	5.51885	1	0.958047	84.3414
GOTERM_BP_DIRECT	GO:0045601~regulation of endothelial cell differentiation	3	0.00182977	0.0960512	APOLD1, CEACAM1, KDR	1008	6	11126	5.51885	1	0.958047	84.3414
GOTERM_BP_DIRECT	GO:0055003~cardiac myofibril assembly	3	0.00182977	0.0960512	PDGFRA, FHOD3, PDGFRB	1008	6	11126	5.51885	1	0.958047	84.3414
GOTERM_BP_DIRECT	GO:1900017~positive regulation of cytokine production involved in inflammatory response	3	0.00182977	0.0960512	IL17RC, CD6, IL17RA	1008	6	11126	5.51885	1	0.958047	84.3414
GOTERM_BP_DIRECT	GO:0045602~negative regulation of endothelial cell differentiation	3	0.00182977	0.0960512	XDH, ACVRL1, ID1	1008	6	11126	5.51885	1	0.958047	84.3414
GOTERM_BP_DIRECT	GO:0032367~intracellular cholesterol transport	3	0.00182977	0.0960512	STAR, ABCA1, ABCG1	1008	6	11126	5.51885	1	0.958047	84.3414
GOTERM_BP_DIRECT	GO:0086002~cardiac muscle cell action potential involved in contraction	3	0.00182977	0.0960512	PKP2, CACNA1C, SCN5A	1008	6	11126	5.51885	1	0.958047	84.3414
GOTERM_BP_DIRECT	GO:0043691~reverse cholesterol transport	3	0.00182977	0.0960512	LIPG, ABCA1, ABCG1	1008	6	11126	5.51885	1	0.958047	84.3414
GOTERM_BP_DIRECT	GO:0001542~ovulation from ovarian follicle	3	0.00182977	0.0960512	NOS3, ADAMTS1, NOS2	1008	6	11126	5.51885	1	0.958047	84.3414
GOTERM_BP_DIRECT	GO:0034109~homotypic cell-cell adhesion	3	0.00182977	0.0960512	L1CAM, PTPRU, CXADR	1008	6	11126	5.51885	1	0.958047	84.3414
GOTERM_BP_DIRECT	GO:0014894~response to denervation involved in regulation of muscle adaptation	3	0.00182977	0.0960512	FBXO32, SCN5A, MTMR4	1008	6	11126	5.51885	1	0.958047	84.3414
GOTERM_BP_DIRECT	GO:0051024~positive regulation of immunoglobulin secretion	3	0.00182977	0.0960512	RBP4, H2-T23, CEACAM1	1008	6	11126	5.51885	1	0.958047	84.3414
GOTERM_BP_DIRECT	GO:0006703~estrogen biosynthetic process	3	0.00182977	0.0960512	STAR, HSD17B2, HSD17B1	1008	6	11126	5.51885	1	0.958047	84.3414
GOTERM_BP_DIRECT	GO:0044406~adhesion of symbiont to host	3	0.00182977	0.0960512	ICAM1, GBP7, GBP2	1008	6	11126	5.51885	1	0.958047	84.3414
UP_SEQ_FEATURE	domain:KH 1	5	0.00304962	0.0965622	MEX3B, TDRKH, IGF2BP2, BICC1, IGF2BP3	1032	20	11563	2.80111	1	0.972073	83.3774
UP_SEQ_FEATURE	repeat:12	5	0.00304962	0.0965622	PRX, FMN2, NEFH, ALMS1, MUC4	1032	20	11563	2.80111	1	0.972073	83.3774
UP_SEQ_FEATURE	domain:Peptidase M12B	5	0.00304962	0.0965622	ADAMTS8, ADAMTS20, ADAM23, ADAMTS15, ADAMTS1	1032	20	11563	2.80111	1	0.972073	83.3774
UP_SEQ_FEATURE	domain:Disintegrin	5	0.00304962	0.0965622	ADAMTS8, ADAMTS20, ADAM23, ADAMTS15, ADAMTS1	1032	20	11563	2.80111	1	0.972073	83.3774
UP_SEQ_FEATURE	domain:KH 2	5	0.00304962	0.0965622	MEX3B, TDRKH, IGF2BP2, BICC1, IGF2BP3	1032	20	11563	2.80111	1	0.972073	83.3774
GOTERM_BP_DIRECT	GO:0051321~meiotic cell cycle	10	0.00609923	0.0966848	TEX19.1, MEI4, TEX15, CLGN, DPEP3, BRDT, STAG3, H2AFX, DMC1, SYCP1	1008	61	11126	1.80946	1	0.957805	84.5417
GOTERM_BP_DIRECT	GO:0007601~visual perception	10	0.00609923	0.0966848	AIPL1, EPAS1, PPEF2, GRM6, SLC24A1, VAX2, CNGA3, OLFM2, GPR179, GJC1	1008	61	11126	1.80946	1	0.957805	84.5417
GOTERM_CC_DIRECT	GO:0005912~adherens junction	8	0.00487939	0.0972308	FMN1, PKP2, TRPV4, EFNA5, JAG1, CXADR, CEACAM1, CDH5	1073	44	11880	2.01305	1	0.618698	77.1607
INTERPRO	IPR006821:Intermediate filament head, DNA-binding domain	3	0.00182977	0.097854	VIM, NEFL, NEFM	1105	6	12069	5.46109	1	0.825952	82.123
INTERPRO	IPR000885:Fibrillar collagen, C-terminal	3	0.00182977	0.097854	COL27A1, COL11A2, COL5A1	1105	6	12069	5.46109	1	0.825952	82.123
INTERPRO	IPR015621:Interleukin-1 receptor family	3	0.00182977	0.097854	IL1R2, IL18RAP, IL1RAP	1105	6	12069	5.46109	1	0.825952	82.123
INTERPRO	IPR013568:SEFIR	3	0.00182977	0.097854	IL17RE, IL17RC, IL17RA	1105	6	12069	5.46109	1	0.825952	82.123
GOTERM_BP_DIRECT	GO:0035023~regulation of Rho protein signal transduction	11	0.00670916	0.0980522	FGD2, OBSCN, NGEF, PLEKHG1, ARHGEF26, ARHGEF6, PLEKHG6, ARHGEF16, FGD3, FGD4, FARP2	1008	70	11126	1.7345	1	0.958619	84.9658
GOTERM_MF_DIRECT	GO:0004497~monooxygenase activity	7	0.00426946	0.0985893	CYP11A1, CYP4F17, CYP2S1, CYP21A1, MICAL3, CYP4F13, CYP26A1	991	35	10722	2.16387	1	0.843231	80.943

## Sheet: SAM_DAVID_3D
Category	Term	Count	%	PValue	Genes	List Total	Pop Hits	Pop Total	Fold Enrichment	Bonferroni	Benjamini	FDR
UP_SEQ_FEATURE	glycosylation site:N-linked (GlcNAc...)	352	0.175009	2.27227e-35	SCPEP1, ADCY1, CADM1, PTGS2, LYPD6, VTCN1, GBGT1, PGF, OSMR, FGFRL1, FAM20C, L1CAM, CD52, LPAR2, GGT1, FSTL1, ADORA1, SYP, S1PR1, SERPINE2, PRRT3, SEMA7A, CREB3L1, VNN1, CREB3L4, CREB3L3, IZUMO1, PI16, ADAM8, GRID1, CDH23, PTPRM, STC2, ADAMTS20, OLFML2B, MDGA1, CDHR1, EFNB2, PTPRT, TMEM130, TMEM25, SIRPA, PRELP, CD37, LPAR5, SERPINF1, ABCB1A, TACSTD2, LPAR6, CCR4, PRL4A1, TMEM138, ABCB1B, TFPI, C…	1272	1737	11563	1.84216	6.80089e-32	6.80089e-32	4.09055e-32
UP_KEYWORDS	Glycoprotein	376	0.186941	3.95768e-33	SCPEP1, ADCY1, CADM1, PTGS2, LYPD6, VTCN1, OSMR, GBGT1, PGF, FGFRL1, FAM20C, L1CAM, CD52, LPAR2, GGT1, FSTL1, ADORA1, SYP, S1PR1, SERPINE2, PRRT3, SEMA7A, CREB3L1, VNN1, CREB3L4, CREB3L3, IZUMO1, PI16, ADAM8, IZUMO4, GRID1, CDH23, PTPRM, STC2, ADAMTS20, OLFML2B, MDGA1, CDHR1, EFNB2, BSN, PTPRT, TMEM130, TMEM25, SIRPA, PRELP, CD37, LPAR5, SERPINF1, ABCB1A, TACSTD2, LPAR6, CCR4, PRL4A1, TMEM138, AB…	1424	1918	12826	1.76571	1.55141e-30	1.55141e-30	5.50397e-30
UP_KEYWORDS	Disulfide bond	281	0.139709	7.6666e-31	PVR, EDN3, RARRES2, PTGS2, CADM1, VTCN1, PGF, OSMR, FAM20C, FGFRL1, L1CAM, GGT1, FSTL1, ADORA1, S1PR1, ISG15, CTGF, SEMA7A, IZUMO1, ADAM8, PTPRM, STC2, ADAMTS20, CRTAC1, OLFML2B, MDGA1, EFNB2, PTPRT, TMEM25, SIRPA, PRELP, LPAR5, COLQ, TACSTD2, PRL4A1, CCR4, LPAR6, TFPI, WFDC1, PDGFRB, ADAMTS1, STC1, LAMC2, ADAMTS2, HS3ST3B1, ITGA2B, GCNT4, IL1R2, ENPP1, ENPP4, ITGA11, IFI30, EPHB4, EPHB2, ALCAM, …	1424	1306	12826	1.93796	3.00531e-28	1.50265e-28	1.0662e-27
UP_SEQ_FEATURE	topological domain:Extracellular	230	0.114352	9.07365e-28	AQP9, CADM1, OSMR, FGFRL1, SYT8, L1CAM, AQP7, LPAR2, GGT1, ADORA1, TMEM140, S1PR1, PRRT3, IZUMO1, PI16, ADAM8, CDH23, GRID1, PTPRM, CDHR1, EFNB2, UNC5CL, PTPRT, TMEM130, TMEM25, SIRPA, ATP2C2, CD37, LPAR5, ABCB1A, TACSTD2, CCR4, LPAR6, PDGFRB, CD164L2, ITGA2B, IL1R2, ENPP1, ENPP4, ITGA11, EPHB4, EPHB2, ALCAM, EPHB6, SLC29A3, CD68, SLC29A4, SLAMF9, CELSR2, SECTM1A, EPHA1, FCGR3, KDR, SEMA6B, NOTCH…	1272	1037	11563	2.01619	2.71574e-24	1.35787e-24	1.63344e-24
UP_KEYWORDS	Signal	341	0.16954	4.08237e-26	PVR, SCPEP1, EDN3, RARRES2, CADM1, PTGS2, LYPD6, VTCN1, PGF, OSMR, FGFRL1, FAM20C, L1CAM, CD52, FSTL1, SERPINE2, PRRT3, CTGF, SEMA7A, VNN1, HTRA3, IZUMO1, PI16, ADAM8, IZUMO4, GRID1, CDH23, LRRC3, MAGI2, PTPRM, STC2, CRTAC1, ADAMTS20, OLFML2B, MDGA1, CDHR1, EFNB2, PTPRT, TMEM130, TMEM25, SIRPA, PRELP, SERPINF1, COLQ, TACSTD2, PRL4A1, TFPI, WFDC1, CD164L2, PDGFRB, ADAMTS1, STC1, LAMC2, ADAMTS2, IT…	1424	1814	12826	1.69316	1.60029e-23	5.3343e-24	5.67737e-23
UP_SEQ_FEATURE	signal peptide	279	0.138714	1.19408e-25	SCPEP1, EDN3, RARRES2, LYPD6, PTGS2, CADM1, VTCN1, PGF, OSMR, FAM20C, FGFRL1, L1CAM, CD52, FSTL1, SERPINE2, PRRT3, CTGF, SEMA7A, VNN1, HTRA3, IZUMO1, PI16, ADAM8, GRID1, CDH23, LRRC3, PTPRM, STC2, CRTAC1, ADAMTS20, OLFML2B, CDHR1, MDGA1, EFNB2, PTPRT, TMEM130, TMEM25, SIRPA, PRELP, COLQ, SERPINF1, TACSTD2, PRL4A1, TFPI, WFDC1, PDGFRB, CD164L2, ADAMTS1, STC1, LAMC2, ADAMTS2, ITGA2B, IL1R2, ENPP4, …	1272	1407	11563	1.80258	3.57388e-22	1.19129e-22	2.14959e-22
UP_SEQ_FEATURE	disulfide bond	217	0.107889	1.48362e-24	EDN3, PTGS2, CADM1, PGF, OSMR, VTCN1, FGFRL1, L1CAM, FSTL1, ADORA1, CTGF, SEMA7A, IZUMO1, ADAM8, PTPRM, ADAMTS20, CRTAC1, OLFML2B, MDGA1, EFNB2, PTPRT, SIRPA, TMEM25, PRELP, COLQ, LPAR5, TACSTD2, PRL4A1, CCR4, LPAR6, TFPI, PDGFRB, WFDC1, STC1, ADAMTS1, LAMC2, ADAMTS2, HS3ST3B1, ITGA2B, IL1R2, ENPP1, ITGA11, EPHB2, ALCAM, LGALS3BP, CD68, NAGA, ST6GAL1, SLAMF9, CELSR2, FCGR3, SFRP5, LAMA1, SEMA6B, …	1272	1004	11563	1.96476	4.44048e-21	1.11012e-21	2.67082e-21
UP_SEQ_FEATURE	topological domain:Cytoplasmic	289	0.143686	6.20535e-24	ADCY1, SGMS2, AQP9, CADM1, GBGT1, SYT5, OSMR, FGFRL1, SYT8, L1CAM, AQP7, LPAR2, GGT1, ADORA1, TMEM140, SYP, S1PR1, PRRT3, CREB3L1, CREB3L4, CREB3L3, IZUMO1, PI16, ADAM8, GRID1, CDH23, PTPRM, CDHR1, EFNB2, UNC5CL, PTPRT, TMEM130, TMEM25, SIRPA, CD37, ATP2C2, LPAR5, ABCB1A, TACSTD2, CCR4, LPAR6, ABCB1B, PDGFRB, CD164L2, HS3ST3B1, ITGA2B, IL1R2, RTP4, CLCN2, ENPP1, ENPP4, ITGA11, EPHB4, EPHB2, ALCAM…	1272	1513	11563	1.73637	1.85726e-20	3.71452e-21	1.11709e-20
GOTERM_CC_DIRECT	GO:0005887~integral component of plasma membrane	132	0.0656282	5.34653e-23	PVR, ADCY1, AQP9, CADM1, PLXNA1, SGMS2, OSMR, GRIK3, FGFRL1, TSPAN5, TLR3, GGT1, IL17RE, AQP7, IL17RC, IL17RD, SLC7A5, IL17RA, TAPBP, SLC7A7, PTGIR, ATP2B4, ANK2, ADAM8, CDHR1, MRGPRE, SLC22A21, PROKR1, TMEM130, SIRPA, ATP2C2, CD37, TACSTD2, LPAR6, GPR50, GLP1R, HS3ST3B1, C3AR1, SLC38A4, CLCN2, ENPP1, ADORA2A, ABCA1, ABCA4, EPHB4, EPHB2, SLCO2A1, ALCAM, EPHB6, LAPTM5, ADRA2C, PLXND1, HCN3, MRC1, …	1326	489	11880	2.41845	3.11703e-20	3.11703e-20	7.86536e-20
GOTERM_CC_DIRECT	GO:0005886~plasma membrane	383	0.190421	2.57643e-19	PVR, ADCY1, CADM1, SGMS2, VTCN1, SYT5, FGFRL1, SYT8, L1CAM, AQP7, CD52, LPAR2, GGT1, ADORA1, DIRAS1, ATP2B4, S1PR1, DIRAS2, SEMA7A, DYNC2H1, VNN1, IZUMO1, ADAM8, CDCA5, SYK, GRID1, CDH23, ARC, MAGI2, CRYAB, MDGA1, CDHR1, EFNB2, ZHX2, PTPRT, SPIRE1, TMEM25, SIRPA, LPAR5, COLQ, ABCB1A, TACSTD2, LPAR6, CCR4, ABCB1B, RYR1, PDGFRB, SURF2, IL1R2, CDK5R1, CLCN2, ENPP1, GNAI1, ENPP4, OAS3, IFI30, NRN1, E…	1326	2300	11880	1.49191	1.50206e-16	7.51028e-17	3.79022e-16
UP_KEYWORDS	Cell membrane	268	0.133245	9.36589e-18	ADCY1, SGMS2, CADM1, VTCN1, FGFRL1, SYT8, L1CAM, CD52, LPAR2, GGT1, ADORA1, DIRAS1, ATP2B4, S1PR1, DIRAS2, SEMA7A, DYNC2H1, VNN1, IZUMO1, SYK, GRID1, CDH23, ARC, MAGI2, CDHR1, MDGA1, SPIRE1, TMEM25, LPAR5, ABCB1A, CCR4, LPAR6, ABCB1B, PDGFRB, IL1R2, CDK5R1, CLCN2, ENPP1, GNAI1, ENPP4, NRN1, EPHB4, EPHB2, ALCAM, CD68, EPHB6, SLC29A4, BLNK, OSBPL6, CELSR2, SECTM1A, EPHA1, KDR, FCGR3, SEMA6B, NOTCH1…	1424	1483	12826	1.6277	3.67143e-15	9.17858e-16	1.30252e-14
UP_KEYWORDS	Transmembrane helix	452	0.224727	1.49289e-13	SGMS2, GBGT1, OSMR, C130071C03RIK, GM14164, L1CAM, TMEM140, SYP, ADAM8, TMEM14A, CDH23, LRRC3, PTPRM, CDHR1, PTPRT, TMEM130, SIRPA, TMEM138, RYR1, CD164L2, SURF1, IL1R2, RTP4, GM9958, TMEM50B, ALCAM, SLC29A3, TMEM125, SLC29A4, SPNS2, CYP46A1, SECTM1A, SYNGR3, CD200, BTBD11, D630045J12RIK, H2-D1, LTC4S, MMP23, LRRC15, MMP24, ST6GALNAC5, ST6GALNAC6, KISS1R, TMEM108, XYLT2, IL1RAP, TRPV4, SLC22A3, T…	1424	3038	12826	1.34008	5.85354e-11	1.17071e-11	2.07667e-10
GOTERM_CC_DIRECT	GO:0016021~integral component of membrane	457	0.227213	1.16793e-13	SGMS2, GBGT1, OSMR, C130071C03RIK, GM14164, L1CAM, TMEM140, SYP, VNN1, ADAM8, TMEM14A, CDH23, LRRC3, PTPRM, CDHR1, BSN, PTPRT, TMEM130, SIRPA, TMEM138, RYR1, CD164L2, SURF1, IL1R2, RTP4, GM9958, TMEM50B, ALCAM, SLC29A3, TMEM125, SLC29A4, SPNS2, CYP46A1, SECTM1A, SYNGR3, CD200, BTBD11, D630045J12RIK, H2-D1, LTC4S, MMP23, LRRC15, MMP24, ST6GALNAC5, ST6GALNAC6, KISS1R, TMEM108, XYLT2, IL1RAP, TRPV4,…	1326	3071	11880	1.33324	6.80918e-11	2.26973e-11	1.71818e-10
UP_KEYWORDS	Transmembrane	452	0.224727	2.56781e-13	SGMS2, GBGT1, OSMR, C130071C03RIK, GM14164, L1CAM, TMEM140, SYP, ADAM8, TMEM14A, CDH23, LRRC3, PTPRM, CDHR1, PTPRT, TMEM130, SIRPA, TMEM138, RYR1, CD164L2, SURF1, IL1R2, RTP4, GM9958, TMEM50B, ALCAM, SLC29A3, TMEM125, SLC29A4, SPNS2, CYP46A1, SECTM1A, SYNGR3, CD200, BTBD11, D630045J12RIK, H2-D1, LTC4S, MMP23, LRRC15, MMP24, ST6GALNAC5, ST6GALNAC6, KISS1R, TMEM108, XYLT2, IL1RAP, TRPV4, SLC22A3, T…	1424	3047	12826	1.33613	1.00663e-10	1.67772e-11	3.57125e-10
UP_SEQ_FEATURE	transmembrane region	386	0.191913	1.02106e-13	SGMS2, GBGT1, OSMR, L1CAM, TMEM140, SYP, ADAM8, CDH23, TMEM14A, LRRC3, PTPRM, CDHR1, PTPRT, TMEM130, SIRPA, TMEM138, CD164L2, SURF1, IL1R2, RTP4, TMEM50B, ALCAM, SLC29A3, TMEM125, SLC29A4, SPNS2, CYP46A1, SECTM1A, SYNGR3, CD200, BTBD11, D630045J12RIK, H2-D1, LTC4S, MMP23, LRRC15, MMP24, ST6GALNAC5, ST6GALNAC6, KISS1R, TMEM108, XYLT2, IL1RAP, SLC22A3, TMEM102, TRPV4, SLC22A5, DPP6, KCNG1, ZDHHC1, …	1272	2536	11563	1.38363	3.05707e-10	5.09511e-11	1.83875e-10
INTERPRO	IPR013783:Immunoglobulin-like fold	85	0.0422606	1.95281e-13	PVR, CADM1, PLXNA1, OSMR, VTCN1, LEPR, FNDC3C1, FGFRL1, PRTG, H2-D1, L1CAM, MMP23, TAPBP, TRIM46, NRCAM, CILP2, UNC5A, SEMA7A, IL1RAP, H2-K1, VASN, ICAM1, PTPRM, PSG29, ICAM5, MDGA1, SDK2, GM11127, PTPRT, PSG22, SIRPA, TMEM25, CNTN2, PDGFRB, JAM2, JAM3, IL1R2, ITGB4, LRIG1, CNTFR, EPHB4, FAM187B, EPHB2, ALCAM, LINGO1, FNDC4, FNDC5, EPHB6, IL12RB1, COL7A1, MYOM3, KIRREL, IL10RA, PLXND1, NFATC2, NF…	1356	330	12069	2.29254	3.68899e-10	3.68899e-10	3.33522e-10
UP_KEYWORDS	Secreted	127	0.0631423	1.33718e-11	SCPEP1, EDN3, RARRES2, LYPD6, PGF, FAM20C, TGFB3, FSTL1, IL17RE, NRCAM, WNT4, WNT3, ISG15, SERPINE2, PAPPA, CTGF, TGFBI, HTRA3, LGI2, SPON2, PI16, IZUMO4, IL1A, LAD1, STC2, SCUBE3, ADAMTS20, CRTAC1, OLFML2B, COL22A1, PRL8A9, TMEM25, PRELP, SERPINF1, PRL4A1, TFPI, DEFB22, WFDC1, LAMC2, ADAMTS1, STC1, ADAMTS2, IL1R2, PODN, ENPP1, ADAMTSL5, CLU, IFI30, MDK, TRF, EPHB6, LGALS3BP, LPL, ST6GAL1, COL16A…	1424	629	12826	1.81859	5.24173e-09	7.48818e-10	1.85961e-08
GOTERM_CC_DIRECT	GO:0005576~extracellular region	136	0.0676169	1.59828e-11	SCPEP1, EDN3, RARRES2, LYPD6, PGF, FAM20C, TGFB3, FSTL1, IL17RE, FGF13, GSTM1, NRCAM, WNT4, WNT3, ISG15, SERPINE2, PAPPA, CTGF, TGFBI, HTRA3, LGI2, SPON2, PI16, IZUMO4, IL1A, LAD1, STC2, SCUBE3, ADAMTS20, CRTAC1, OLFML2B, MFI2, PRL8A9, TMEM25, PRELP, SERPINF1, PRL4A1, TFPI, DEFB22, WFDC1, STC1, LAMC2, ADAMTS1, ADAMTS2, IL1R2, PODN, ENPP1, ADAMTSL5, CLU, IFI30, MDK, TRF, EPHB6, LGALS3BP, EGF, LPL,…	1326	689	11880	1.76845	9.31796e-09	2.32949e-09	2.35125e-08
INTERPRO	IPR007110:Immunoglobulin-like domain	61	0.0303282	1.22714e-11	PVR, CADM1, VTCN1, LEPR, FGFRL1, PRTG, H2-D1, L1CAM, MMP23, TAPBP, NRCAM, CILP2, UNC5A, SEMA7A, IL1RAP, IZUMO1, H2-K1, ICAM1, PTPRM, PSG29, ICAM5, MDGA1, SDK2, GM11127, PTPRT, PSG22, TMEM25, SIRPA, CNTN2, PDGFRB, JAM2, JAM3, IL1R2, LRIG1, CNTFR, FAM187B, ALCAM, LINGO1, KIRREL, MYOM3, LRFN2, H2-Q2, H2-Q4, FLT1, HAPLN3, SLAMF9, FLT3, FLT4, MXRA8, IGSF9B, H2-Q7, SECTM1A, FCGR3, KDR, IL6RA, CDON, H2-…	1356	216	12069	2.51355	2.31807e-08	1.15903e-08	2.09578e-08
GOTERM_CC_DIRECT	GO:0009986~cell surface	86	0.0427578	3.07234e-10	NRP1, ACVRL1, TGFB3, H2-D1, TLR2, TLR3, LPAR2, CXCR2, L1CAM, PDIA4, IL17RC, SDC2, SDC3, SLC1A4, KISS1R, WNT4, TNFRSF11A, ANK3, TRPV4, TMEM102, ADAM8, KCNQ2, DPP6, IL1A, H2-K1, VASN, ICAM1, SCUBE3, BST2, CRYAB, MFI2, SLC3A2, BSN, PTPRT, NFAM1, PKD2L1, TNFRSF10B, ABCB1A, CNTN2, TFPI, DEFB22, PDGFRB, JAM3, ADAM15, AOC3, ITGA2B, RTN4RL1, ADORA2B, ENPP1, IFITM3, ADAMTS15, CLU, ITGB4, ABCA1, CD24A, TRF…	1326	385	11880	2.00129	1.79117e-07	3.58234e-08	4.51976e-07
UP_KEYWORDS	Receptor	107	0.0531986	6.77799e-10	PVR, OSMR, GRIK3, FGFRL1, TLR2, TLR3, LPAR2, PTPN21, IL17RE, IL17RC, IL17RD, VIPR2, ADORA1, IL17RA, PTGIR, S1PR1, UNC5A, GRID1, PTPRM, CDHR1, MRGPRE, PTPRT, PROKR1, AHR, LPAR5, LPAR6, CCR4, RYR1, GPR50, PDGFRB, IRAK1BP1, GLP1R, ITGA2B, C3AR1, IL1R2, ADORA2B, ADORA2A, ITGA11, ITGB4, PAQR7, CNTFR, EPHB4, EPHB2, NR2C1, AHRR, EPHB6, IL12RB1, ADRA2C, PLXND1, MRC1, GABRE, GABRA4, ESRRB, MET, PTPN13, IT…	1424	530	12826	1.8184	2.65697e-07	3.32122e-08	9.42619e-07
UP_KEYWORDS	Membrane	599	0.297813	6.81821e-10	PTGS2, SGMS2, OSMR, GBGT1, VTCN1, C130071C03RIK, GM14164, L1CAM, TMEM140, SYP, DIRAS1, DIRAS2, VNN1, ADAM8, TMEM14A, CDH23, SYK, LRRC3, ARC, MAGI2, PTPRM, GATM, CDHR1, PTPRT, SPIRE1, TMEM130, SIRPA, NME4, TMEM138, RYR1, CD164L2, SURF1, IL1R2, RTP4, GNAI1, GM9958, ALCAM, TMEM50B, SLC29A3, SLC29A4, TMEM125, CDC42EP5, SPNS2, CYP46A1, GAS2, SECTM1A, SYNGR3, CYP17A1, RGS2, TNK1, CD200, SYTL1, D630045J…	1424	4450	12826	1.21241	2.67274e-07	2.96971e-08	9.48211e-07
UP_KEYWORDS	Immunoglobulin domain	51	0.0253564	1.44292e-08	IL1R2, CADM1, VTCN1, LEPR, PRTG, FGFRL1, LRIG1, L1CAM, CNTFR, MMP23, TAPBP, NRCAM, ALCAM, LINGO1, CILP2, UNC5A, MYOM3, KIRREL, SEMA7A, IL1RAP, IZUMO1, LRFN2, H2-K1, ICAM1, PTPRM, HAPLN3, FLT1, FLT3, ICAM5, SLAMF9, MDGA1, FLT4, SDK2, PTPRT, NFAM1, MXRA8, IGSF9B, SIRPA, TMEM25, IL6RA, KDR, FCGR3, SEMA4F, CDON, CNTN2, SCN4B, PDGFRB, JAM2, MERTK, CD200, JAM3	1424	198	12826	2.31999	5.65622e-06	5.65623e-07	2.00667e-05
UP_KEYWORDS	Ion transport	74	0.0367916	2.39857e-08	SLC5A5, KCNC3, AQP9, LRRC8B, GRIK3, LRRC8D, ANO1, AQP7, KCNJ11, ATP2B4, SLC24A3, TRPV4, SLC22A3, SLC22A5, KCNQ2, KCNQ1, KCNG1, NIPAL4, GRID1, TRPM6, TRPM5, ATP4A, MFI2, SLC22A21, PKD2L1, ATP6V1F, ATP6V1C2, SLC26A6, ATP2C2, KCNT1, SLC26A7, SLC41A2, CLIC6, COMMD3, RYR1, SLC41A1, STEAP2, SLC40A1, STEAP1, SLC38A4, CLCN2, SFXN5, TRF, SLCO2A1, KCNS3, TTYH2, SLC39A8, SLCO3A1, SLC39A4, SCNN1B, SCNN1A, HC…	1424	343	12826	1.94321	9.40235e-06	8.54762e-07	3.3357e-05
GOTERM_CC_DIRECT	GO:0005615~extracellular space	117	0.0581705	3.93116e-08	EDN3, PGF, FAM20C, PRTG, TGFB3, FSTL1, GGT1, CNP, DLK1, WNT4, PTGIS, WNT3, SERPINE2, PAPPA, CTGF, TGFBI, VNN1, PI16, SPON2, IL1A, CES1A, STC2, ADAMTS20, MDGA1, MFI2, PRELP, SERPINF1, TACSTD2, TFPI, WFDC1, LAMC2, STC1, PODN, ENPP1, CLU, OAS3, NRN1, SERPINH1, ABCA3, TRF, LGALS3BP, EGF, LPL, MET, ECM1, MUC4, LAMA1, SFRP1, SFRP2, SERPINB6C, INS2, MERTK, BMP7, ENG, COL20A1, BMP6, BMP8A, NRP1, TPBPA, E…	1326	637	11880	1.64558	2.29184e-05	3.81977e-06	5.78318e-05
GOTERM_CC_DIRECT	GO:0005578~proteinaceous extracellular matrix	43	0.0213789	5.94375e-08	ALPL, PODN, ADAMTS14, ADAMTS15, ADAMTSL5, GPLD1, TGFB3, MMP24, GPC4, LGALS3BP, WNT4, CILP2, WNT3, COL7A1, CTGF, EMID1, COMP, TGFBI, ADAMTS10, PHOSPHO1, FBN2, SPON2, COL11A1, ZP1, HAPLN3, LAD1, ADAMTS20, CRTAC1, OLFML2B, COL22A1, COL16A1, ECM1, COL5A1, SLIT3, PRELP, LAMA1, FBLN1, SFRP1, FBLN7, ADAMTS1, LAMC2, WNT7A, ADAMTS2	1326	159	11880	2.42295	3.46515e-05	4.95028e-06	8.74393e-05
UP_KEYWORDS	Developmental protein	116	0.0576733	1.62968e-07	CDX2, CADM1, PGF, PRTG, L1CAM, ZIC1, SLC7A5, TAF7L, WNT4, WNT3, SERPINE2, UNC5A, SEMA7A, DYNC2H1, CREB3L1, CREB3L4, ATOH8, IFRD1, ARC, NKX2-9, MDGA1, EFNB2, DLL3, SIX3, EOMES, VAX2, HES6, NAV1, RYR1, PDGFRB, STMN1, PRDM1, BIN1, TSHZ3, TDRD5, TDRD7, PAQR7, HOXB13, MDK, EPHB4, EPHB2, TCP11, B3GNT5, NRARP, FBXW4, PLXND1, MDFI, DMBX1, DIXDC1, FOXA1, CELSR2, EN1, GAS7, NKX6-1, KDR, FEZF1, SFRP5, SEMA6…	1424	649	12826	1.60988	6.38812e-05	5.32359e-06	0.000226639
UP_KEYWORDS	Immunity	51	0.0253564	2.39359e-07	APOBEC3, CADM1, VTCN1, TLR2, H2-D1, TLR3, CRCP, NOD1, SMPDL3B, IL1RAP, SPON2, MX2, SYK, H2-K1, ARHGEF2, BST2, EOMES, PRKCB, PRKD1, OAS1B, OAS1A, PRDM1, EIF2AK2, IFIH1, C3, IFITM3, OAS3, NLRX1, IFI30, RNF125, ALCAM, TAP2, TAP1, INPP5D, DHX58, ZBP1, H2-Q2, ITK, IRGM1, H2-Q7, AIM2, PSMB8, PSMB9, DDX58, IFIT1, SARM1, IRF5, ETS1, IRF7, C1RL, ADAR	1424	215	12826	2.13655	9.38243e-05	7.21757e-06	0.000332877
UP_KEYWORDS	Extracellular matrix	34	0.0169042	3.32357e-07	PODN, ADAMTS15, MMP24, LGALS3BP, WNT4, CILP2, WNT3, COL7A1, CTGF, EMID1, COMP, TGFBI, ADAMTS10, FBN2, SPON2, COL11A1, HAPLN3, ZP1, LAD1, ADAMTS20, CRTAC1, COL22A1, COL16A1, COL5A3, ECM1, COL5A1, PRELP, LAMA1, FBLN1, FBLN7, LAMC2, ADAMTS1, ADAMTS2, WNT7A	1424	118	12826	2.59524	0.000130275	9.30595e-06	0.000462209
UP_KEYWORDS	Ion channel	39	0.0193902	5.87337e-07	KCNC3, CLCN2, LRRC8B, GRIK3, ANO1, LRRC8D, KCNJ11, KCNS3, TTYH2, TRPV4, KCNQ2, SCNN1B, SCN5A, HCN3, KCNQ1, SCNN1A, KCNG1, GRID1, KCNE4, GABRE, TRPM6, TMC8, TRPM5, GABRA4, KCNB1, ITPR3, CACNA2D2, PKD2L1, P2RX5, SLC26A6, KCNT1, P2RX3, CLIC6, RYR1, CACNA1G, KCNF1, SCN4B, CACNA1E, CACNA1B	1424	149	12826	2.35754	0.00023021	1.5349e-05	0.00081681
INTERPRO	IPR003961:Fibronectin, type III	36	0.0178986	1.22205e-07	OSMR, LEPR, PRTG, FNDC3C1, ITGB4, L1CAM, CNTFR, EPHB4, EPHB2, TRIM46, NRCAM, FNDC4, EPHB6, FNDC5, IL12RB1, COL7A1, MYOM3, IL10RA, LRFN2, VASN, FLRT1, PTPRM, MDGA1, SDK2, PTPRT, IGSF9B, MID1, EPHA1, MID2, IL6RA, SNED1, CDON, CNTN2, MERTK, IL3RA, COL20A1	1356	123	12069	2.60501	0.000230819	7.69457e-05	0.000208709
SMART	SM00060:FN3	29	0.0144183	2.01559e-06	OSMR, LEPR, PRTG, FNDC3C1, ITGB4, L1CAM, CNTFR, EPHB4, EPHB2, NRCAM, FNDC4, EPHB6, FNDC5, IL12RB1, COL7A1, MYOM3, VASN, PTPRM, SDK2, PTPRT, IGSF9B, MID1, EPHA1, MID2, SNED1, CDON, CNTN2, MERTK, COL20A1	803	91	6550	2.59946	0.000731393	0.000731393	0.00277159
INTERPRO	IPR003599:Immunoglobulin subtype	44	0.0218761	4.56665e-07	PVR, IL1R2, CADM1, VTCN1, PRTG, FGFRL1, LRIG1, L1CAM, CNTFR, ALCAM, NRCAM, LINGO1, CILP2, MYOM3, UNC5A, KIRREL, IL1RAP, LRFN2, ICAM1, FLT1, PSG29, PTPRM, HAPLN3, FLT3, SLAMF9, ICAM5, FLT4, MDGA1, SDK2, MXRA8, IGSF9B, PSG22, SIRPA, FCGR3, IL6RA, KDR, CDON, CNTN2, PDGFRB, SCN4B, MERTK, JAM2, CD200, JAM3	1356	175	12069	2.23783	0.000862269	0.000215637	0.000779916
SMART	SM00409:IG	44	0.0218761	3.95557e-06	PVR, IL1R2, CADM1, VTCN1, PRTG, FGFRL1, LRIG1, L1CAM, CNTFR, ALCAM, NRCAM, LINGO1, CILP2, MYOM3, UNC5A, KIRREL, IL1RAP, LRFN2, ICAM1, FLT1, PSG29, PTPRM, HAPLN3, FLT3, SLAMF9, ICAM5, FLT4, MDGA1, SDK2, MXRA8, IGSF9B, PSG22, SIRPA, FCGR3, IL6RA, KDR, CDON, CNTN2, PDGFRB, SCN4B, MERTK, JAM2, CD200, JAM3	803	175	6550	2.05088	0.00143484	0.000717679	0.00543913
KEGG_PATHWAY	mmu04080:Neuroactive ligand-receptor interaction	26	0.0129268	7.37066e-06	C3AR1, ADORA2B, ADORA2A, GRIK3, LEPR, LPAR2, ADORA1, VIPR2, EDNRA, EDNRB, KISS1R, PTGIR, S1PR1, ADRA2C, GRID1, GABRE, GABRA4, PTGER4, RXFP2, P2RX5, GRM4, GPR35, LPAR6, P2RX3, GPR50, GLP1R	586	79	4605	2.5863	0.0020396	0.0020396	0.00972911
GOTERM_BP_DIRECT	GO:0002376~immune system process	50	0.0248592	5.64108e-07	APOBEC3, CADM1, VTCN1, TLR2, H2-D1, TLR3, CRCP, NOD1, SMPDL3B, IL1RAP, SPON2, MX2, SYK, H2-K1, ARHGEF2, BST2, EOMES, AHR, PRKCB, PRKD1, OAS1B, PRDM1, EIF2AK2, IFIH1, C3, IFITM3, OAS3, NLRX1, IFI30, RNF125, ALCAM, TAP2, TAP1, INPP5D, DHX58, ZBP1, ITK, IRGM1, H2-Q7, AIM2, PSMB8, PSMB9, DDX58, IFIT1, SARM1, IRF5, ETS1, IRF7, C1RL, ADAR	1253	212	11126	2.09422	0.00238615	0.00238615	0.00105476
UP_KEYWORDS	Differentiation	78	0.0387803	8.29913e-06	NRP2, TEX19.1, RARRES2, NRP1, CADM1, FOXA3, PGF, NR6A1, PAX6, L1CAM, TTLL7, ZIC1, SLC7A5, SDC2, TAF7L, CCHCR1, PRMT7, SERPINE2, SEMA7A, PAX8, CREB3L4, ATOH8, IFRD1, BCL7B, MDGA1, DMRT3, EFNB2, DLL3, EOMES, HES6, SLIT3, PRKD1, NAV1, SEMA4F, GADD45G, USH1C, BRDT, RBM38, IFT81, CALR3, STMN1, TGFB1I1, BIN1, TDRD5, TDRD7, FHL1, PAQR7, MDK, MLF1, TCP11, CHD5, SIM2, ZBTB7B, MDFI, INSM1, TESC, FLT1, CPNE…	1424	425	12826	1.65305	0.00324799	0.000203309	0.011541
UP_KEYWORDS	Innate immunity	33	0.0164071	8.3764e-06	APOBEC3, IFIH1, C3, IFITM3, OAS3, TLR2, CRCP, NLRX1, TLR3, NOD1, SMPDL3B, IL1RAP, SPON2, MX2, DHX58, SYK, ZBP1, ARHGEF2, IRGM1, BST2, AIM2, DDX58, PRKD1, IFIT1, SARM1, IRF5, IRF7, OAS1B, C1RL, OAS1A, PRDM1, EIF2AK2, ADAR	1424	129	12826	2.30412	0.00327818	0.000193132	0.0116485
GOTERM_BP_DIRECT	GO:0006811~ion transport	68	0.0338085	8.14099e-07	SLC5A5, KCNC3, LRRC8B, GRIK3, LRRC8D, ANO1, KCNJ11, ATP2B4, SLC24A3, TRPV4, SLC22A3, SLC22A5, KCNQ2, KCNQ1, KCNG1, NIPAL4, GRID1, TRPM6, TRPM5, ATP4A, MFI2, SLC22A21, PKD2L1, ATP6V1F, ATP6V1C2, SLC26A6, ATP2C2, KCNT1, SLC26A7, SLC41A2, CLIC6, COMMD3, RYR1, SLC41A1, STEAP2, SLC40A1, STEAP1, SLC38A4, CLCN2, SFXN5, TRF, SLCO2A1, KCNS3, TTYH2, SLC39A8, SLCO3A1, SLC39A4, SCNN1B, HCN3, SCN5A, SCNN1A, K…	1253	329	11126	1.83527	0.00344177	0.00172237	0.00152218
GOTERM_BP_DIRECT	GO:0007275~multicellular organism development	119	0.0591648	1.51769e-06	CDX2, CADM1, PGF, PRTG, L1CAM, ZIC1, SLC7A5, TAF7L, WNT4, WNT3, SERPINE2, UNC5A, SEMA7A, DYNC2H1, CREB3L1, CREB3L4, ATOH8, IFRD1, ARC, NKX2-9, MDGA1, EFNB2, DLL3, GTF2IRD2, SIX3, EOMES, VAX2, HES6, NAV1, RYR1, PDGFRB, STMN1, PRDM1, BIN1, TSHZ3, TDRD5, TDRD7, PAQR7, HOXB13, MDK, EPHB4, EPHB2, TCP11, B3GNT5, NRARP, FBXW4, PLXND1, MDFI, DMBX1, DIXDC1, FOXA1, CELSR2, EN1, GAS7, NKX6-1, KDR, FEZF1, SF…	1253	691	11126	1.52917	0.0064068	0.00214018	0.00283771
UP_KEYWORDS	Angiogenesis	26	0.0129268	2.24083e-05	ACVRL1, NRP1, PGF, EPHB4, RNF213, WARS, TSPAN12, S1PR1, PLXND1, SYK, FMNL3, VAV3, FLT1, FLT4, EFNB2, RASIP1, ECM1, EPHA1, KDR, PRKD1, NOTCH1, ECSCR, HIF3A, ENG, JAM3, ADAM15	1424	94	12826	2.4913	0.0087457	0.00048789	0.0311589
GOTERM_BP_DIRECT	GO:0055085~transmembrane transport	51	0.0253564	2.26253e-06	SLC45A3, SLC16A13, SLC5A5, KCNC3, SLC45A1, SLC16A12, SLC24A3, SLC22A3, TRPV4, SLC22A5, KCNQ2, KCNQ1, KCNG1, SLC43A2, TRPM6, TRPM5, SLC22A21, SLC26A6, ABCB1A, SLC26A7, ABCB1B, SLC41A3, SLC37A2, RYR1, SLC41A1, CLCN2, SFXN5, KCNS3, SLC29A4, TAP2, TAP1, SLC39A8, SLC39A4, HCN3, SCN5A, SPNS2, ABCB9, KCNB1, ITPR3, SLC16A3, SLC16A2, SLC16A5, SLC16A4, SLC18A2, ABCC3, KCNF1, SLC13A3, CACNA1E, SLC13A4, SLC4…	1253	228	11126	1.9862	0.00953607	0.00239259	0.00423036
COG_ONTOLOGY	Secondary metabolites biosynthesis, transport, and catabolism	9	0.00447465	0.000569778	CYP2U1, CYP17A1, PTGIS, CYP11A1, CYP46A1, CYP4F16, CYP4F13, CYP26A1, RETSAT	125	25	1499	4.31712	0.0107705	0.0107705	0.426227
GOTERM_CC_DIRECT	GO:0009897~external side of plasma membrane	33	0.0164071	2.13009e-05	ENOX2, RTN4RL1, VTCN1, OSMR, ANO1, TLR2, H2-D1, L1CAM, ABCA1, DLK1, CD24A, GPC4, ALCAM, GSR, IL12RB1, S1PR1, TNFRSF11A, SEMA7A, SCNN1B, SCNN1A, H2-K1, LY75, ICAM1, FLT3, ITGA2, ITGA4, DNAIC2, FCGR3, KDR, CCR4, ENG, ITGA2B, GFRA3	1326	134	11880	2.20639	0.0123418	0.00155112	0.0313315
GOTERM_MF_DIRECT	GO:0004930~G-protein coupled receptor activity	31	0.0154127	1.00516e-05	C3AR1, ADORA2B, ADORA2A, CXCR2, ADORA1, VIPR2, EDNRA, EDNRB, PTGIR, KISS1R, S1PR1, CXCR6, ADRA2C, PTGER4, RXFP2, FZD1, MRGPRE, PROKR1, CELSR2, GPR179, SFRP5, SMO, GRM4, GPR35, SFRP1, LPAR5, LPAR6, CCR4, SFRP2, GPR50, GLP1R	1218	116	10722	2.35251	0.012347	0.012347	0.0163087
UP_KEYWORDS	Heparin-binding	16	0.00795494	3.26903e-05	FGFBP3, NRP2, LPL, NRP1, FSTL1, MDK, COL5A1, APLP1, SERPINE2, RSPO1, CTGF, COMP, FBLN7, ADAMTS1, LAMC2, SERPIND1	1424	43	12826	3.35145	0.012733	0.000674236	0.045453
KEGG_PATHWAY	mmu04514:Cell adhesion molecules (CAMs)	23	0.0114352	4.7897e-05	H2-Q2, PVR, H2-K1, CLDN7, ICAM1, PTPRM, CADM1, VTCN1, H2-D1, L1CAM, ITGA4, H2-Q7, CDH4, SDC2, CLDN23, SDC3, NRCAM, ALCAM, CNTN2, H2-T22, H2-T24, JAM2, JAM3	586	72	4605	2.51031	0.0131802	0.00661194	0.0632074
GOTERM_MF_DIRECT	GO:0008201~heparin binding	24	0.0119324	1.07915e-05	FGFBP3, NRP2, LPL, NRP1, ADAMTSL5, FGFRL1, ADAMTS15, FSTL1, COL5A3, MDK, COL5A1, SLIT3, PRELP, APLP1, SFRP1, SERPINE2, RSPO1, CTGF, COMP, FBLN7, ADAMTS1, LAMC2, SERPIND1, BMP7	1218	78	10722	2.7086	0.0132498	0.00664697	0.0175089
UP_SEQ_FEATURE	domain:Fibronectin type-III 4	15	0.00745775	5.81811e-06	PTPRM, OSMR, LEPR, FNDC3C1, PRTG, SDK2, ITGB4, L1CAM, PTPRT, NRCAM, IL12RB1, COL7A1, MYOM3, CNTN2, COL20A1	1272	34	11563	4.01047	0.0172629	0.00248457	0.0104733
GOTERM_CC_DIRECT	GO:0016324~apical plasma membrane	45	0.0223733	3.12036e-05	HAX1, MAL2, OSMR, MYO7A, ANO1, HSPA1A, CNTFR, SLC7A5, TRF, NOD1, ANK2, SLC29A4, TRPV4, SLC22A5, SLCO3A1, SLC39A4, SCNN1B, SLC1A1, SCNN1A, UPK2, KCNE4, TCIRG1, MUC1, TRPM6, HPN, BST2, ATP4A, SLC3A2, PDE4D, MAL, SHANK2, IL6RA, MUC4, NOTCH1, SLC26A6, PROM2, ABCB1A, ABCB1B, ATP6V1E1, PDGFRB, STC1, ATP6V0A4, PDZK1, DCXR, SLC46A1	1326	212	11880	1.90173	0.0180275	0.00201929	0.0458942
GOTERM_MF_DIRECT	GO:0042605~peptide antigen binding	10	0.00497183	1.65175e-05	H2-K1, H2-Q2, H2-Q4, TAP2, MAML1, TAP1, H2-D1, H2-T22, H2-T24, H2-Q7	1218	16	10722	5.50185	0.0202088	0.00678215	0.0267981
GOTERM_BP_DIRECT	GO:0045087~innate immune response	44	0.0218761	4.91158e-06	APOBEC3, FRK, IFIH1, C3, IFITM3, TRIM14, OAS3, TLR2, CRCP, NLRX1, TLR3, NOD1, SMPDL3B, IL1RAP, VNN1, SPON2, MX2, DHX58, ZBP1, SYK, ITK, ARHGEF2, IRGM1, BST2, TRIM62, TRIM21, AIM2, MID2, DDX58, PRKD1, IFIT1, SARM1, IRF5, IRF7, OAS1B, C1RL, DEFB22, TNK1, PRDM1, OAS1A, EIF2AK2, SRMS, ADAM15, ADAR	1253	190	11126	2.0563	0.0205857	0.00415148	0.0091832
UP_KEYWORDS	Voltage-gated channel	19	0.00944649	5.59858e-05	KCNC3, TRPM5, CLCN2, KCNB1, CACNA2D2, KCNJ11, KCNS3, CLIC6, CACNA1G, KCNF1, SCN4B, CACNA1E, KCNQ2, KCNQ1, HCN3, SCN5A, KCNG1, CACNA1B, KCNE4	1424	60	12826	2.85222	0.021708	0.00109675	0.0778315
UP_KEYWORDS	Zymogen	24	0.0119324	6.33373e-05	KLK8, ADAMTS20, KLK4, HEXA, ADAMTS15, CTSA, GGT1, MMP15, MMP14, MMP23, TMPRSS6, PSMB8, MMP24, PSMB9, CASP6, GGT6, CTSJ, PAPPA, CTSO, CTSC, ADAMTS1, ADAMTS2, CTSH, ADAM15	1424	88	12826	2.45646	0.0245233	0.00118163	0.0880475
KEGG_PATHWAY	mmu04950:Maturity onset diabetes of the young	9	0.00447465	9.63012e-05	HES1, FOXA2, ONECUT1, FOXA3, BHLHA15, PKLR, PAX6, INS2, NKX6-1	586	14	4605	5.0518	0.026324	0.00885282	0.127047
UP_KEYWORDS	G-protein coupled receptor	28	0.0139211	7.07715e-05	C3AR1, ADORA2B, ADORA2A, LPAR2, CXCR2, ADORA1, VIPR2, EDNRA, EDNRB, KISS1R, PTGIR, S1PR1, CXCR6, ADRA2C, PTGER4, RXFP2, FZD1, MRGPRE, PROKR1, CELSR2, SMO, GRM4, GPR35, LPAR5, LPAR6, CCR4, GPR50, GLP1R	1424	112	12826	2.25176	0.0273621	0.00126027	0.0983773
GOTERM_BP_DIRECT	GO:0030154~cell differentiation	93	0.0462381	6.69535e-06	NRP2, TEX19.1, RARRES2, NRP1, CDX2, CADM1, FOXA3, PGF, MITF, NR6A1, PAX6, L1CAM, DLK1, TTLL7, ZIC1, SLC7A5, SDC2, TAF7L, CCHCR1, WNT4, PRMT7, SERPINE2, CTGF, SEMA7A, PAX8, CREB3L4, ATOH8, IFRD1, SCX, BCL7B, SOX10, DMRT3, MDGA1, EFNB2, DLL3, EOMES, HES6, SLIT3, PRKD1, EYA2, NAV1, SEMA4F, GADD45G, BRDT, USH1C, RBM38, IFT81, CALR3, STMN1, TGFB1I1, BIN1, FRK, TDRD5, ONECUT1, TDRD7, FHL1, PAQR7, MDK, …	1253	523	11126	1.57895	0.0279567	0.00471467	0.0125181
GOTERM_CC_DIRECT	GO:0016020~membrane	607	0.30179	5.4407e-05	LDHB, PTGS2, SGMS2, OSMR, PGF, GBGT1, VTCN1, L1CAM, TMEM140, SYP, DIRAS1, DIRAS2, SERPINE2, VNN1, ADAM8, TMEM14A, CDH23, SYK, LRRC3, ARC, MAGI2, PTPRM, GATM, KIF5A, CDHR1, PTPRT, SPIRE1, TMEM130, MAGED2, SIRPA, NME4, TMEM138, RYR1, CD164L2, EIF2AK2, SURF1, IL1R2, RTP4, GNAI1, ALCAM, TMEM50B, SLC29A3, SLC29A4, TMEM125, IQSEC1, CDC42EP5, SPNS2, CYP46A1, GAS2, SECTM1A, SYNGR3, CYP17A1, PARP9, RGS2, …	1326	4840	11880	1.12361	0.0312223	0.00316699	0.080009
UP_KEYWORDS	Transducer	34	0.0169042	8.36549e-05	C3AR1, GNA15, ADORA2B, GNAI1, ADORA2A, LPAR2, CXCR2, ADORA1, VIPR2, EDNRA, PLCL1, EDNRB, PTGIR, KISS1R, S1PR1, PLCH2, CXCR6, ADRA2C, PTGER4, RXFP2, FZD1, MRGPRE, PROKR1, CELSR2, GNAL, SMO, GRM4, GPR35, LPAR5, CCR4, LPAR6, ACAP1, GPR50, GLP1R	1424	150	12826	2.04159	0.0322622	0.00142481	0.116277
UP_SEQ_FEATURE	domain:Fibronectin type-III 1	22	0.010938	1.18524e-05	PTPRM, OSMR, LEPR, SDK2, PRTG, FNDC3C1, ITGB4, CNTFR, L1CAM, PTPRT, EPHB4, EPHA1, EPHB2, NRCAM, EPHB6, IL12RB1, SNED1, COL7A1, MYOM3, CDON, CNTN2, MERTK	1272	70	11563	2.85699	0.0348527	0.0044245	0.0213347
UP_SEQ_FEATURE	domain:Fibronectin type-III 2	22	0.010938	1.18524e-05	PTPRM, OSMR, LEPR, SDK2, PRTG, FNDC3C1, ITGB4, CNTFR, L1CAM, PTPRT, EPHB4, EPHA1, EPHB2, NRCAM, EPHB6, IL12RB1, SNED1, COL7A1, MYOM3, CDON, CNTN2, MERTK	1272	70	11563	2.85699	0.0348527	0.0044245	0.0213347
GOTERM_BP_DIRECT	GO:0001525~angiogenesis	41	0.0203845	9.35977e-06	NRP2, NRP1, ACVRL1, PTGS2, PGF, LEPR, HOXB13, RNF213, EPHB4, EPHB2, NRCAM, WARS, TSPAN12, S1PR1, CTGF, TGFBI, HS6ST1, ADAM8, EGF, PLXND1, SYK, KLF5, FMNL3, FLT1, VAV3, FLT4, EFNB2, RASIP1, TBX1, MMP14, EPHA1, ECM1, KDR, PRKD1, NOTCH1, ECSCR, HIF3A, WNT7A, JAM3, ENG, ADAM15	1253	176	11126	2.06852	0.0388635	0.00564668	0.0174993
GOTERM_BP_DIRECT	GO:0006955~immune response	26	0.0129268	1.0056e-05	ENPP1, SUSD2, ENDOU, OAS3, TLR2, H2-D1, NRADD, CCL28, CD24A, TNFRSF11A, SH2D6, LTB, IL1A, BLNK, H2-K1, H2-Q2, CEBPG, TNFSF9, SECTM1A, TNFRSF10B, CCR4, OAS1B, MAP3K14, OAS1G, IRAK1BP1, BMP6	1253	89	11126	2.59401	0.0416934	0.0053093	0.018801
GOTERM_BP_DIRECT	GO:0007411~axon guidance	29	0.0144183	1.09427e-05	NRP2, CDK5R1, NRP1, PAX6, L1CAM, CDH4, CD24A, EPHB2, NRCAM, ALCAM, WNT3, ANK3, CRMP1, UNC5A, LHX2, RUNX3, TUBB3, KLF7, KIF5A, EFNB2, DPYSL5, SLIT3, FEZF1, LAMA1, SEMA6C, SEMA4F, CNTN2, BMP7, GFRA3	1253	106	11126	2.42929	0.045285	0.00513593	0.0204585
GOTERM_MF_DIRECT	GO:0005216~ion channel activity	22	0.010938	3.89265e-05	TRPM6, KCNC3, TRPM5, CLCN2, GABRA4, GRIK3, KCNB1, ITPR3, GJC1, KCNS3, P2RX3, RYR1, KCNF1, TRPV4, CACNA1E, KCNQ2, KCNQ1, HCN3, SCN5A, KCNG1, GRID1, CACNA1B	1218	73	10722	2.65295	0.046975	0.0119565	0.063144
UP_SEQ_FEATURE	domain:Fibronectin type-III 3	17	0.00845212	1.65447e-05	PTPRM, OSMR, LEPR, FNDC3C1, PRTG, SDK2, ITGB4, L1CAM, PTPRT, NRCAM, IL12RB1, SNED1, COL7A1, MYOM3, CDON, CNTN2, COL20A1	1272	46	11563	3.3595	0.0483126	0.00548696	0.0297796
INTERPRO	IPR000276:G protein-coupled receptor, rhodopsin-like	22	0.010938	2.65015e-05	C3AR1, ADORA2B, PTGER4, ADORA2A, RXFP2, MRGPRE, LPAR2, PROKR1, CXCR2, ADORA1, EDNRA, EDNRB, PTGIR, GPR35, KISS1R, S1PR1, LPAR5, CCR4, LPAR6, CXCR6, GPR50, ADRA2C	1356	72	12069	2.71958	0.0488295	0.00996244	0.0452511
GOTERM_BP_DIRECT	GO:0002485~antigen processing and presentation of endogenous peptide antigen via MHC class I via ER pathway, TAP-dependent	7	0.00348028	1.27119e-05	H2-K1, ABCB9, ABCB1A, ABCB1B, TAP2, TAP1, H2-D1	1253	7	11126	8.87949	0.052412	0.00536908	0.023766
INTERPRO	IPR017452:GPCR, rhodopsin-like, 7TM	22	0.010938	3.33202e-05	C3AR1, ADORA2B, PTGER4, ADORA2A, RXFP2, MRGPRE, LPAR2, PROKR1, CXCR2, ADORA1, EDNRA, EDNRB, PTGIR, GPR35, KISS1R, S1PR1, LPAR5, CCR4, LPAR6, CXCR6, GPR50, ADRA2C	1356	73	12069	2.68233	0.0610029	0.0104356	0.0568908
UP_KEYWORDS	Neurogenesis	39	0.0193902	0.000191006	NRP2, NRP1, BRSK2, L1CAM, FGF13, PAX3, TTLL7, ZIC1, SLC7A5, SDC2, EPHB2, SERPINE2, SEMA7A, ATOH8, CHD5, SIM2, INSM1, MAGI2, BEND6, MDGA1, EFNB2, PHF10, ELAVL3, IGSF9B, GAS7, RUFY3, SLIT3, PRKD1, FEZF1, SEMA6B, DACT1, SEMA6C, SARM1, NAV1, SEMA4F, ULK2, CHN1, OPHN1, STMN1	1424	189	12826	1.85859	0.0721467	0.00311521	0.265306
UP_SEQ_FEATURE	sequence variant	46	0.0228704	3.25871e-05	APOBEC3, RARRES2, SEC1, ENPP1, NDN, MYO7A, LEPR, MITF, H2-D1, PAX6, DLK1, PAX3, GJA4, WT1, TK1, NR2C1, SLC7A7, ST6GALNAC5, TOR3A, NOD1, DAO, SLC22A5, COL11A1, CDH23, HSPA9, ZBTB7B, H2-K1, SOX10, LYRM5, BRCA2, EPRS, LPIN1, CACNA2D2, SIRPA, PSMB8, AHR, PSMB9, TNNT3, CTSJ, SEMA4F, PARP14, MAP3K14, CACNA1B, NFIB, ADAR, MON1A	1272	222	11563	1.8836	0.0929293	0.00970607	0.0586472
INTERPRO	IPR005821:Ion transport domain	17	0.00845212	6.9588e-05	TRPM6, KCNC3, TRPM5, KCNB1, ITPR3, KCNS3, CACNA1G, RYR1, TRPV4, KCNF1, CACNA1E, KCNQ2, KCNQ1, HCN3, SCN5A, KCNG1, CACNA1B	1356	50	12069	3.02615	0.123182	0.0186042	0.11878
UP_KEYWORDS	Antiviral defense	17	0.00845212	0.000415803	APOBEC3, IFIH1, IFITM3, OAS3, CRCP, DDIT4, DDX58, IFIT1, IRF5, ISG15, OAS1B, OAS1A, EIF2AK2, MX2, DHX58, ADAR, ZBP1	1424	58	12826	2.63999	0.150433	0.00649993	0.57671
INTERPRO	IPR003597:Immunoglobulin C1-set	10	0.00497183	8.9205e-05	H2-K1, H2-Q2, H2-Q4, GM11127, H2-D1, H2-T22, H2-T24, SIRPA, H2-Q7, TAPBP	1356	19	12069	4.68444	0.155082	0.0208442	0.15224
SMART	SM00408:IGc2	29	0.0144183	0.000477013	IL1R2, CADM1, VTCN1, FGFRL1, PRTG, LRIG1, L1CAM, CNTFR, NRCAM, LINGO1, CILP2, MYOM3, KIRREL, LRFN2, FLT1, PSG29, ICAM5, MDGA1, FLT4, SDK2, IGSF9B, PSG22, KDR, IL6RA, CDON, CNTN2, PDGFRB, JAM2, JAM3	803	120	6550	1.97125	0.159028	0.0560975	0.653946
UP_SEQ_FEATURE	domain:Ig-like C2-type 3	18	0.0089493	6.71295e-05	IL1R2, ICAM1, FLT1, ICAM5, FLT4, FGFRL1, SDK2, LRIG1, L1CAM, KDR, NRCAM, ALCAM, MYOM3, KIRREL, CDON, IL1RAP, CNTN2, PDGFRB	1272	56	11563	2.92192	0.182027	0.0181001	0.120778
COG_ONTOLOGY	Signal transduction mechanisms / Cytoskeleton / Cell division and chromosome partitioning / General function prediction only	7	0.00348028	0.01103	WDR66, TESC, NCALD, PLCH2, RCN3, CIB2, MYL9	125	24	1499	3.49767	0.19001	0.100006	7.97617
GOTERM_MF_DIRECT	GO:0003700~transcription factor activity, sequence-specific DNA binding	106	0.0527014	0.000176032	CDX2, ZFP583, ZIC1, GATA1, CREB3L1, CREB3L4, CREB3L3, ATOH8, ZFP623, NKX2-9, ZFP595, MLXIPL, ZHX2, SIX3, EOMES, ZFP629, VAX2, HES6, AHR, DDIT3, HES1, ZIM1, PRDM1, NFE2L3, ZFP358, ONECUT1, WT1, NR2C1, OVOL1, RUNX3, KLF5, DMBX1, KLF6, IKZF4, KLF7, RFX5, ESRRB, FOXA1, TEAD1, NKX6-1, SALL3, ATF6, ATF5, NOTCH1, ETS1, ZFP772, HIVEP3, KLF2, FOSL2, FOXA2, FOXA3, ELF5, E2F8, MITF, NR6A1, PAX6, PAX3, ZKSCA…	1218	661	10722	1.41167	0.195548	0.0425855	0.285249
INTERPRO	IPR003598:Immunoglobulin subtype 2	29	0.0144183	0.000118365	IL1R2, CADM1, VTCN1, FGFRL1, PRTG, LRIG1, L1CAM, CNTFR, NRCAM, LINGO1, CILP2, MYOM3, KIRREL, LRFN2, FLT1, PSG29, ICAM5, MDGA1, FLT4, SDK2, IGSF9B, PSG22, KDR, IL6RA, CDON, CNTN2, PDGFRB, JAM2, JAM3	1356	120	12069	2.15094	0.200368	0.0245388	0.201957
GOTERM_CC_DIRECT	GO:0043025~neuronal cell body	63	0.0313226	0.000390555	PRPH, ZFP385A, NRP1, ACVRL1, STAR, SRCIN1, SYT5, TGFB3, CRCP, L1CAM, VGF, ADORA1, KCNJ11, SDC2, SLC1A4, SERPINE2, DPP6, NQO1, TUBB3, ARHGEF2, TRPM5, PTGER4, KIF5A, BSN, PMM1, SMO, SERPINF1, RASGRF1, GTF2I, CCR4, CNTN2, AKAP5, NRGN, COBL, CDK5R1, RAP1GAP, ADORA2A, EPHB2, ALCAM, RGS12, PDE1C, CRMP1, ENO2, HCN3, TUBB4A, PARD6A, DIXDC1, HPN, CPNE5, KCNB1, MET, DPYSL5, RTN4R, IGSF9B, ITPR3, SHANK2, RU…	1326	363	11880	1.55492	0.203667	0.0204906	0.573015
SMART	SM00407:IGc1	9	0.00447465	0.000689964	H2-K1, H2-Q2, H2-Q4, GM11127, H2-D1, H2-T22, H2-T24, SIRPA, H2-Q7	803	18	6550	4.07846	0.221622	0.0607146	0.944603
INTERPRO	IPR003006:Immunoglobulin/major histocompatibility complex, conserved site	11	0.00546902	0.000136922	H2-K1, NRCAM, H2-Q2, H2-Q4, GM11127, H2-D1, H2-T22, H2-T24, SIRPA, H2-Q7, TAPBP	1356	24	12069	4.07937	0.227917	0.0255347	0.233586
INTERPRO	IPR000884:Thrombospondin, type 1 repeat	13	0.00646338	0.000141869	ADAMTS14, ADAMTS20, ADAMTS15, ADAMTSL5, FAM187B, CILP2, RSPO1, CTGF, UNC5A, ADAMTS10, ADAMTS1, SPON2, ADAMTS2	1356	33	12069	3.50623	0.2351	0.0240702	0.242017
GOTERM_BP_DIRECT	GO:0008285~negative regulation of cell proliferation	56	0.0278423	6.36586e-05	ACVRL1, PTGS2, FOXA3, FGFRL1, TLR2, TGFB3, GPLD1, PAX6, PTTG1, ADORA1, H19, GATA1, SPRY1, KISS1R, SERPINE2, PTGES, 4930503L19RIK, FOSL1, IL1A, MAGI2, RXFP2, PIM2, SLIT3, CD37, XIRP1, BTG2, NPPC, RIPPLY3, EIF2AK2, ING4, PODN, ADORA2B, NDN, ADORA2A, IFITM3, HSPA1A, WT1, TRP53INP1, INPP5D, CHD5, TES, INSM1, TESC, FLT3, FBXO2, SFRP5, FEZF1, ATF5, CDKN1A, NOTCH1, SFRP1, SFRP2, IRF6, BMP7, IGFBP3, NFIB	1253	290	11126	1.71466	0.236317	0.0242114	0.118961
UP_KEYWORDS	Symport	17	0.00845212	0.00076528	SLC16A13, SLC38A4, SLC5A5, SLC6A12, SLC45A1, SLC16A12, SLC6A17, SLC1A4, SLC16A3, SLC16A2, SLC16A5, SLC6A9, SLC16A4, SLC24A3, SLC13A3, SLC22A5, SLC1A1	1424	61	12826	2.51015	0.259259	0.0114761	1.05904
GOTERM_BP_DIRECT	GO:0007186~G-protein coupled receptor signaling pathway	41	0.0203845	7.77119e-05	C3AR1, GNA15, ADORA2B, GNAI1, ADORA2A, LPAR2, CXCR2, ABCA1, VIPR2, ADORA1, EDNRA, EDNRB, RGS11, PTGIR, KISS1R, S1PR1, BHLHA15, CXCR6, PIK3R5, ADRA2C, SYK, PTGER4, RXFP2, FZD1, MRGPRE, PROKR1, CELSR2, ITPR3, RGS16, GPR179, GNAL, SMO, GRM4, GPR35, LPAR5, RGS2, LPAR6, CCR4, GPR50, INS2, GLP1R	1253	192	11126	1.89614	0.280445	0.0270542	0.145205
SMART	SM00209:TSP1	12	0.0059662	0.000975567	CILP2, RSPO1, ADAMTS14, CTGF, UNC5A, ADAMTS20, ADAMTSL5, ADAMTS15, ADAMTS10, ADAMTS1, SPON2, ADAMTS2	803	32	6550	3.05884	0.298338	0.0684084	1.33318
GOTERM_BP_DIRECT	GO:0034765~regulation of ion transmembrane transport	19	0.00944649	8.5215e-05	KCNC3, TRPM5, CLCN2, KCNB1, CACNA2D2, KCNJ11, KCNS3, STOM, CLIC6, KCNF1, SCN4B, CACNA1E, KCNQ2, KCNQ1, HCN3, SCN5A, KCNG1, CACNA1B, KCNE4	1253	61	11126	2.76574	0.302952	0.0273798	0.159214
UP_SEQ_FEATURE	domain:Ig-like C2-type 1	21	0.0104409	0.000121168	IL1R2, ICAM1, FLT1, CADM1, ICAM5, FLT4, SDK2, FGFRL1, LRIG1, L1CAM, FCGR3, KDR, NRCAM, ALCAM, MYOM3, KIRREL, CDON, IL1RAP, CNTN2, PDGFRB, MERTK	1272	75	11563	2.54531	0.30419	0.0297711	0.217903
UP_SEQ_FEATURE	domain:Ig-like C2-type 2	21	0.0104409	0.000121168	IL1R2, ICAM1, FLT1, CADM1, ICAM5, FLT4, SDK2, FGFRL1, LRIG1, L1CAM, FCGR3, KDR, NRCAM, ALCAM, MYOM3, KIRREL, CDON, IL1RAP, CNTN2, PDGFRB, MERTK	1272	75	11563	2.54531	0.30419	0.0297711	0.217903
GOTERM_MF_DIRECT	GO:0005244~voltage-gated ion channel activity	18	0.0089493	0.000316537	KCNC3, TRPM5, CLCN2, KCNB1, CACNA2D2, KCNJ11, KCNS3, CLIC6, KCNF1, SCN4B, CACNA1E, KCNQ2, KCNQ1, HCN3, SCN5A, KCNG1, CACNA1B, KCNE4	1218	61	10722	2.59759	0.323824	0.0631358	0.512382
INTERPRO	IPR013320:Concanavalin A-like lectin/glucanase, subgroup	30	0.0149155	0.00020837	NRP2, NRP1, TRIM17, TRIM14, TRIM46, NPTX1, PAPPA, TRIM30D, COMP, BC067074, COL11A1, LMAN1L, PTPRM, SPSB1, MDGA1, COL22A1, PTPRT, CELSR2, COL5A3, MID1, COL16A1, TRIM62, COL5A1, TRIM21, SLIT3, MID2, LAMA1, RYR1, CALR3, COL20A1	1356	130	12069	2.05395	0.325411	0.0322721	0.355271
UP_SEQ_FEATURE	domain:Ig-like C2-type 5	12	0.0059662	0.000143296	NRCAM, ICAM1, FLT1, ICAM5, KIRREL, FLT4, CDON, SDK2, CNTN2, PDGFRB, L1CAM, KDR	1272	29	11563	3.76155	0.348784	0.0324551	0.257647
UP_KEYWORDS	GPI-anchor	18	0.0089493	0.00114332	ALPL, LPL, RTN4RL1, BST2, VTCN1, MDGA1, MFI2, RTN4R, CD52, CNTFR, NRN1, CD24A, GPC4, SMPDL3B, SEMA7A, CNTN2, VNN1, GFRA3	1424	69	12826	2.34966	0.361375	0.0164716	1.57834
GOTERM_MF_DIRECT	GO:0005102~receptor binding	49	0.024362	0.000424057	NXPH3, PVR, FRK, RARRES2, CADM1, VTCN1, ACOT2, H2-D1, HSPA1A, CNTFR, FGF13, ABCA1, IL17RC, IL17RA, GSTM7, EPHB2, WNT4, WNT3, SERPINE2, RSPO1, GSTK1, NSG1, DAO, IZUMO1, SPON2, SYK, H2-Q2, H2-K1, LPL, H2-Q4, KNG2, TMC8, EFNB2, FZD1, SIX3, TNFSF9, H2-Q7, STX1B, SLIT3, BBS1, LAMA1, NPPC, H2-T22, PDGFRB, TNK1, H2-T24, CD200, WNT7A, SRMS	1218	260	10722	1.65902	0.407998	0.0721565	0.685864
UP_KEYWORDS	Cell adhesion	42	0.0208817	0.00142622	CADM1, ITGA11, ITGB4, L1CAM, CDH4, APLP1, MMP24, ALCAM, NRCAM, LGALS3BP, COL7A1, CTGF, COMP, TGFBI, SPON2, CDH23, ICAM1, FLRT1, PTPRM, ICAM5, CDHR1, SDK2, TMEM8, ITGA2, ITGA4, IGSF9B, COL16A1, EPHA1, MUC4, LAMA1, PODXL2, DSG3, PKP3, FBLN7, CNTN2, LAMC2, TRIP6, JAM3, ENG, ADAM15, AOC3, ITGA2B	1424	230	12826	1.64476	0.428491	0.019783	1.96529
GOTERM_MF_DIRECT	GO:0004871~signal transducer activity	44	0.0218761	0.000475448	C3AR1, GNA15, ADORA2B, GNAI1, ADORA2A, MAPKAPK3, CXCR2, VIPR2, ADORA1, EDNRA, STAT6, EDNRB, PLCL1, RGS11, PTGIR, KISS1R, S1PR1, PLCH2, IL1RAP, CXCR6, ADRA2C, MAGI2, PTGER4, BST2, RXFP2, FZD1, MRGPRE, PROKR1, CELSR2, STAT1, SECTM1A, ECM1, STAT2, GNAL, SMO, GRM4, GPR35, LPAR5, LPAR6, CCR4, ACAP1, PDGFRB, GPR50, GLP1R	1218	227	10722	1.7063	0.444448	0.0708398	0.768682
GOTERM_BP_DIRECT	GO:0071346~cellular response to interferon-gamma	10	0.00497183	0.000148514	MRC1, GBP7, SLC26A6, IL12RB1, STAR, EPRS, TLR3, H2-Q7, GBP3, GBP2	1253	20	11126	4.43974	0.466878	0.0439346	0.277325
UP_SEQ_FEATURE	domain:Ig-like C2-type 4	13	0.00646338	0.00022031	ICAM1, FLT1, ICAM5, FLT4, SDK2, L1CAM, KDR, NRCAM, MYOM3, KIRREL, CDON, CNTN2, PDGFRB	1272	35	11563	3.37644	0.482869	0.0460121	0.395861
INTERPRO	IPR001039:MHC class I, alpha chain, alpha1/alpha2	8	0.00397747	0.000371779	H2-K1, H2-Q2, H2-Q4, GM11127, H2-D1, H2-T22, H2-T24, H2-Q7	1356	14	12069	5.08597	0.504616	0.0525986	0.633051
UP_KEYWORDS	Paired box	5	0.00248592	0.00188176	PAX9, PAX7, PAX8, PAX6, PAX3	1424	6	12826	7.50585	0.522096	0.0251388	2.58543
GOTERM_MF_DIRECT	GO:0005215~transporter activity	24	0.0119324	0.000668864	SLC5A5, AQP9, CRABP2, SLC22A21, SEC14L5, AQP7, ABCA1, ABCA4, ABCA3, SEC14L2, SLCO2A1, SYP, ABCB1B, SLC37A2, ABCC3, SLC22A3, SLC13A3, SLC13A4, SLCO3A1, SLC22A5, STEAP2, RLBP1, FABP5, SLC46A1	1218	100	10722	2.11271	0.562637	0.0877927	1.0798
UP_KEYWORDS	Aminoacyl-tRNA synthetase	12	0.0059662	0.0021244	IARS, TARS, WARS, YARS, CARS, NARS, SARS, AARS, LARS, EPRS, EARS2, MARS	1424	38	12826	2.84432	0.56554	0.0274058	2.91425
GOTERM_CC_DIRECT	GO:0031225~anchored component of membrane	18	0.0089493	0.00143438	ALPL, LPL, RTN4RL1, BST2, VTCN1, MDGA1, MFI2, RTN4R, CD52, CNTFR, NRN1, CD24A, GPC4, SMPDL3B, SEMA7A, CNTN2, VNN1, GFRA3	1326	70	11880	2.30381	0.566924	0.0673608	2.08951
KEGG_PATHWAY	mmu05332:Graft-versus-host disease	7	0.00348028	0.00319047	H2-K1, H2-Q2, H2-D1, H2-T22, H2-T24, H2-Q7, IL1A	586	13	4605	4.23143	0.587357	0.198519	4.13055
GOTERM_BP_DIRECT	GO:0045071~negative regulation of viral genome replication	11	0.00546902	0.000209012	APOBEC3, BST2, ISG15, IFITM3, FAM111A, OAS1B, OAS3, PARP10, EIF2AK2, MX2, ADAR	1253	25	11126	3.90698	0.587392	0.0573094	0.390085
KEGG_PATHWAY	mmu04145:Phagosome	24	0.0119324	0.00327089	TCIRG1, H2-Q2, MRC1, H2-K1, C3, TLR2, H2-D1, ITGA2, H2-Q7, ATP6V1F, FCGR3, ATP6V1C2, ATP6V0E2, TAP2, ATP6V1E1, COMP, TAP1, DYNC2H1, TUBA4A, H2-T22, H2-T24, ATP6V0A4, TUBB3, TUBB4A	586	101	4605	1.86733	0.596477	0.165985	4.23259
SMART	SM00351:PAX	5	0.00248592	0.00272925	PAX9, PAX7, PAX8, PAX6, PAX3	803	6	6550	6.79743	0.629192	0.152399	3.68836
GOTERM_MF_DIRECT	GO:0015293~symporter activity	17	0.00845212	0.000802474	SLC16A13, SLC38A4, SLC5A5, SLC6A12, SLC45A1, SLC16A12, SLC6A17, SLC1A4, SLC16A3, SLC16A2, SLC16A5, SLC6A9, SLC16A4, SLC24A3, SLC13A3, SLC22A5, SLC1A1	1218	60	10722	2.49417	0.629261	0.0944616	1.29418
KEGG_PATHWAY	mmu04612:Antigen processing and presentation	13	0.00646338	0.00377512	H2-Q2, H2-K1, RFX5, TAP2, TAP1, H2-D1, IFI30, H2-T22, HSPA1A, H2-T24, HSPA1B, H2-Q7, TAPBP	586	41	4605	2.49168	0.649252	0.160219	4.87015
KEGG_PATHWAY	mmu05323:Rheumatoid arthritis	13	0.00646338	0.00377512	TCIRG1, ICAM1, FLT1, TGFB3, TLR2, ATP6V1F, ATP6V1C2, ATP6V0E2, TNFRSF11A, ATP6V1E1, ATP6V0A4, LTB, IL1A	586	41	4605	2.49168	0.649252	0.160219	4.87015
GOTERM_BP_DIRECT	GO:0009615~response to virus	17	0.00845212	0.000250005	IFIH1, BST2, IFITM3, CLU, OAS3, TLR3, PIM2, DDX58, IFIT1, OAS1B, BCL3, STMN1, OAS1A, EIF2AK2, MX2, DHX58, ADAR	1253	55	11126	2.74457	0.653164	0.0640389	0.466423
GOTERM_MF_DIRECT	GO:0005249~voltage-gated potassium channel activity	11	0.00546902	0.00089938	KCNS3, KCNC3, KCNT1, KCNB1, KCNF1, KCNQ2, KCNJ11, KCNQ1, HCN3, KCNG1, KCNE4	1218	29	10722	3.33905	0.671143	0.0961601	1.4494
GOTERM_BP_DIRECT	GO:0007155~cell adhesion	53	0.0263507	0.000273021	CADM1, L1CAM, MMP24, SDC3, NRCAM, CTGF, TGFBI, IZUMO1, SPON2, CDH23, ICAM1, PTPRM, ICAM5, CDHR1, SDK2, EFNB2, HES1, PODXL2, CNTN2, LAMC2, JAM3, ADAM15, ITGA2B, AOC3, ITGB4, ITGA11, CD24A, EPHB4, CDH4, APLP1, ALCAM, LGALS3BP, COL7A1, COMP, FLRT1, HAPLN3, TMEM8, ITGA2, CELSR2, ITGA4, COL16A1, IGSF9B, EPHA1, COL5A1, MUC4, LAMA1, STAB1, DSG3, CDON, PKP3, FBLN7, TRIP6, ENG	1253	285	11126	1.65127	0.685383	0.0657616	0.509259
KEGG_PATHWAY	mmu04978:Mineral absorption	10	0.00497183	0.00454592	SLC26A6, TRPM6, CLCN2, MT1, ATP1A2, SLC39A4, STEAP2, STEAP1, SLC40A1, TRF	586	27	4605	2.9105	0.716939	0.164979	5.83717
GOTERM_CC_DIRECT	GO:0008076~voltage-gated potassium channel complex	12	0.0059662	0.00221347	KCNS3, KCNC3, KCNT1, KCNB1, CNTN2, KCNF1, DPP6, KCNQ2, KCNJ11, KCNQ1, KCNG1, KCNE4	1326	38	11880	2.82925	0.725247	0.0945974	3.20731
INTERPRO	IPR009030:Insulin-like growth factor binding protein, N-terminal	21	0.0104409	0.000689371	SCUBE3, SUSD1, DLL3, CELSR2, EPHB4, EPHA1, EPHB2, SLIT3, FBLN1, NOTCH1, SNED1, RSPO1, CTGF, STAB1, COMP, HTRA3, FBN2, MEGF6, EGF, IGFBP3, IGFBP5	1356	83	12069	2.25192	0.728195	0.0888501	1.17084
BIOCARTA	m_eicosanoidPathway:Eicosanoid Metabolism	7	0.00348028	0.00726232	PLA2G4A, PTGIR, PTGIS, PTGS2, PTGER4, PTGES, EPHX1	116	16	968	3.65086	0.732671	0.732671	8.59436
UP_KEYWORDS	Signal-anchor	47	0.0233676	0.00355476	GCNT4, HS3ST6, SEC1, ENPP1, FAM69B, GBGT1, IFITM3, SYT8, GGT1, MMP23, ST6GALNAC5, ST6GALNAC6, B3GNT5, CHST10, XYLT2, ST3GAL5, MAN1A, NSG1, B4GALNT2, B4GALNT3, CREB3L1, FUT1, B3GNT3, CREB3L4, HS6ST1, FUT2, CREB3L3, DPP6, LTB, ACSL6, ST6GAL1, HPN, BST2, SLC3A2, CHST3, EPHX1, 2610528J11RIK, FIBCD1, TNFSF9, TMPRSS6, TMPRSS4, ATF6, GGT6, CHST8, SCARA5, HS3ST3B1, AOC3	1424	278	12826	1.52277	0.752402	0.0440318	4.8318
UP_KEYWORDS	Potassium transport	14	0.00696057	0.00367433	KCNS3, KCNC3, KCNT1, ATP4A, SLC24A3, KCNB1, KCNF1, ATP1A2, KCNQ2, KCNQ1, KCNJ11, HCN3, KCNG1, KCNE4	1424	52	12826	2.42497	0.763779	0.0440918	4.99048
UP_SEQ_FEATURE	DNA-binding region:Basic motif	24	0.0119324	0.000495827	MAF, FOSL2, CEBPG, MITF, MLXIPL, HES6, AHR, MXD4, HES1, ATF5, NPAS2, AHRR, BHLHA15, HEYL, HIF3A, CREB3L1, CREB3L4, CREB3L3, ATOH8, BHLHE41, NFE2L3, FOSL1, SCX, SIM2	1272	101	11563	2.1601	0.773357	0.0942198	0.888838
UP_KEYWORDS	Potassium channel	10	0.00497183	0.00407214	KCNS3, KCNC3, KCNT1, KCNB1, KCNF1, KCNQ2, KCNQ1, HCN3, KCNG1, KCNE4	1424	30	12826	3.00234	0.79801	0.0473149	5.5167
UP_SEQ_FEATURE	short sequence motif:"KMSKS" region	8	0.00397747	0.000552445	IARS, WARS, YARS, CARS, LARS, EPRS, EARS2, MARS	1272	15	11563	4.84822	0.808702	0.098207	0.989857
KEGG_PATHWAY	mmu05164:Influenza A	25	0.0124296	0.00613679	IFIH1, OAS3, TLR3, NLRX1, HSPA1A, HSPA1B, PIK3R5, MX2, IL1A, ICAM1, FDPS, MAPK11, STAT1, TMPRSS4, STAT2, PRKCB, DDX58, TNFRSF10B, MAPK13, IRF7, OAS1B, OAS1A, EIF2AK2, OAS1G, ADAR	586	112	4605	1.7541	0.818251	0.191958	7.80437
COG_ONTOLOGY	Amino acid transport and metabolism	7	0.00348028	0.0874432	GATM, ABCB1A, THNSL2, CTSA, SLC7A5, SLC7A7, 4930438A08RIK	125	38	1499	2.20905	0.824233	0.439839	49.6302
KEGG_PATHWAY	mmu04940:Type I diabetes mellitus	8	0.00397747	0.00654127	H2-K1, H2-Q2, H2-D1, H2-T22, INS2, H2-T24, H2-Q7, IL1A	586	19	4605	3.30878	0.837631	0.182894	8.29845
GOTERM_CC_DIRECT	GO:0005902~microvillus	14	0.00696057	0.00320038	TBC1D10A, MYO7A, FOXA1, CNP, ESPN, FMN2, PROM2, PLEKHG6, ATP6V1E1, USH1C, GAMT, CAR2, DCXR, AOC3	1326	51	11880	2.45941	0.845694	0.124961	4.60622
GOTERM_MF_DIRECT	GO:0043565~sequence-specific DNA binding	69	0.0343057	0.0015505	FOSL2, CDX2, FOXA2, FOXA3, ELF5, MITF, NR6A1, PAX6, PAX3, ZKSCAN3, GATA1, PAX7, PAX8, CREB3L1, CREB3L4, CREB3L3, FOSL1, SCX, GSC, FOXJ2, FOXJ1, DMRT3, NKX2-9, MLXIPL, SIX3, EOMES, DMRT2, VAX2, AHR, DDIT3, HES1, FOXC2, PRDM1, NFE2L3, CUX1, KDM6B, IRX1, NR3C2, HOXB13, TCF7L1, WT1, NR2C1, STAT6, LHX2, POU2F3, GBX1, POU3F1, NFATC2, NFATC1, KLF5, DMBX1, MAF, IKZF4, ESRRB, CEBPG, FOXA1, TBX1, EN1, STAT…	1218	421	10722	1.44276	0.853085	0.147707	2.48638
GOTERM_CC_DIRECT	GO:0030424~axon	45	0.0223733	0.00329792	NRP2, RAB3A, PRPH, COBL, CDK5R1, NRP1, CADM1, RAP1GAP, SRCIN1, ADORA2A, GRIK3, ALDOC, VIM, CRCP, L1CAM, FGF13, SDC3, EPHB2, ALCAM, NRCAM, ANK3, AVIL, ADRA2C, HCN3, PRSS12, CAR2, TUBB3, SYNPO, CPT1C, STMN3, KIF5A, CRYAB, KCNB1, BSN, ITGA2, STAT1, RUFY3, CYP17A1, SARM1, SERPINF1, P2RX3, CNTN2, MYH14, NRGN, BIN1	1326	261	11880	1.5447	0.85425	0.120491	4.74345
UP_KEYWORDS	SH2 domain	19	0.00944649	0.00498099	ITK, FRK, VAV3, SOCS1, STAP2, SOCS5, STAT1, STAT2, TNS4, STAT6, SH2D5, SH2D6, CHN1, INPP5D, GRB7, SRMS, SYK, SH3BP2, BLNK	1424	85	12826	2.01333	0.858779	0.0559456	6.70876
GOTERM_BP_DIRECT	GO:0045165~cell fate commitment	13	0.00646338	0.000492855	GATA1, HES1, NOTCH1, WNT4, WNT3, ONECUT1, MITF, PAX6, PRDM1, TGFB1I1, WNT7A, KDM6B, KDR	1253	37	11126	3.11982	0.876035	0.109513	0.917525
UP_KEYWORDS	Calcium	69	0.0343057	0.00562087	NRP2, NRP1, SYT5, SUSD1, FAM20C, ANO1, MMP24, SYP, EFHD2, ATP2B4, SLC24A3, EEF2K, TRPV4, CIB2, SPON2, COL11A1, CDH23, TRPM6, TRPM5, SCUBE3, NCALD, CDHR1, FIBCD1, MMP15, MMP14, PKD2L1, PRKCB, ATP2C2, KCNT1, RASGRF2, RYR1, ADAMTS1, FKBP10, AOC3, ITGA2B, ENPP1, CABP1, ITGA11, CDH4, MYL9, NPTX1, CALML3, COMP, PLCH2, TTYH2, MAN1A, AVIL, FBN2, EGF, EHD4, MRC1, TESC, ITGA2, CELSR2, ITGA4, ITPR3, CACNA2D…	1424	453	12826	1.37193	0.890255	0.0611798	7.53964
SMART	SM00369:LRR_TYP	21	0.0104409	0.00606971	VASN, LRRC3, FLRT1, PODN, RTN4RL1, LRRC8B, RXFP2, LRRC8D, TLR2, RTN4R, TLR3, LRIG1, LRRC15, SLIT3, PRELP, ELFN1, ELFN2, LINGO1, LGI2, LRRC9, LRFN2	803	91	6550	1.88236	0.890302	0.270734	8.03099
GOTERM_MF_DIRECT	GO:0005272~sodium channel activity	7	0.00348028	0.00178773	TRPM5, SCN4B, SCNN1B, SCNN1A, SCN5A, HCN3, PKD2L1	1218	13	10722	4.74005	0.890476	0.15644	2.86165
UP_KEYWORDS	Lipoprotein	76	0.0377859	0.00597421	GPRIN1, APOBEC3, SGMS2, VTCN1, CD52, LPAR2, CNP, ADORA1, GPC4, EDNRB, TSPAN12, MSRA, CHIC1, DIRAS1, PTGIR, WNT4, WNT3, S1PR1, DIRAS2, SMPDL3B, TIAM2, SEMA7A, RASL10B, VNN1, RHOD, ZDHHC1, FMNL2, FMNL3, BST2, STMN3, NCALD, MDGA1, MFI2, BSN, STOM, ZDHHC15, ZDHHC14, GNAL, LPAR6, ZDHHC12, CNTN2, AKAP5, ARL4D, GBP2, ALPL, RAB3A, CDK5R1, RTN4RL1, ADORA2B, GNAI1, IFITM3, PHKA1, CABP1, ITGB4, CNTFR, ABCA1…	1424	509	12826	1.34486	0.904527	0.0631645	7.99551
KEGG_PATHWAY	mmu00480:Glutathione metabolism	13	0.00646338	0.00853502	GSTM1, GSS, MGST3, GSTM2, GSR, GGT6, GGCT, GSTK1, G6PDX, GGT1, GSTO2, MGST1, GSTM7	586	45	4605	2.27019	0.906925	0.211352	10.6982
UP_SEQ_FEATURE	short sequence motif:Cell attachment site	14	0.00696057	0.000805091	ICAM1, TGFB3, ITGB4, ITGA2, L1CAM, COL16A1, LAMA1, COL7A1, KIRREL, SEMA7A, TGFBI, CNTN2, LAMC2, ADAMTS2	1272	45	11563	2.82813	0.910239	0.132206	1.43945
SMART	SM00353:HLH	16	0.00795494	0.00662271	MITF, MLXIPL, HES6, AHR, MXD4, HES1, NPAS2, AHRR, BHLHA15, HEYL, HIF3A, ATOH8, ID3, BHLHE41, SCX, SIM2	803	62	6550	2.10501	0.910368	0.260296	8.73212
SMART	SM00210:TSPN	6	0.0029831	0.00665382	COL22A1, COL16A1, COL5A3, COL11A1, COL20A1, COL5A1	803	11	6550	4.44922	0.911381	0.236061	8.77142
INTERPRO	IPR020846:Major facilitator superfamily domain	21	0.0104409	0.00129355	SLC16A13, SLC45A3, SPNS2, SLC45A1, SLC16A12, SLC22A21, ABCA1, SLCO2A1, SLC16A3, SLC16A2, SLC16A5, SLC16A4, SLC29A4, SLC37A2, SLC18A2, SLC22A3, SLCO3A1, SLC22A5, SLC40A1, SLC46A1, SLC43A2	1356	87	12069	2.14838	0.913283	0.150415	2.18638
UP_KEYWORDS	Polymorphism	26	0.0129268	0.00624015	APOBEC3, SEC1, RARRES2, NDN, ENPP1, LEPR, GJA4, TK1, NR2C1, TOR3A, NOD1, DAO, CDH23, H2-K1, LYRM5, BRCA2, EPRS, SIRPA, AHR, PSMB8, PSMB9, CTSJ, PARP14, OAS1B, MON1A, CACNA1B	1424	134	12826	1.74763	0.914034	0.0641677	8.33723
GOTERM_MF_DIRECT	GO:0005201~extracellular matrix structural constituent	9	0.00447465	0.00199364	LAMA1, FBLN1, HAPLN3, COMP, FBN2, COL5A3, COL11A1, COL5A1, PRELP	1218	22	10722	3.60121	0.915127	0.161538	3.18627
KEGG_PATHWAY	mmu04966:Collecting duct acid secretion	8	0.00397747	0.00898346	TCIRG1, ATP6V1C2, ATP6V0E2, ATP4A, ATP6V1E1, ATP6V0A4, CAR2, ATP6V1F	586	20	4605	3.14334	0.917887	0.203272	11.23
GOTERM_MF_DIRECT	GO:0005021~vascular endothelial growth factor-activated receptor activity	5	0.00248592	0.00205113	NRP2, FLT1, NRP1, FLT4, KDR	1218	6	10722	7.3358	0.92096	0.155649	3.27673
GOTERM_MF_DIRECT	GO:0015129~lactate transmembrane transporter activity	5	0.00248592	0.00205113	SLC16A13, SLC16A3, SLC16A5, SLC16A4, SLC16A12	1218	6	10722	7.3358	0.92096	0.155649	3.27673
UP_KEYWORDS	Cleavage on pair of basic residues	22	0.010938	0.0064636	EDN3, ZP1, ADAMTS20, C3, ADAMTS15, TGFB3, MMP15, MMP14, MMP23, CDH4, MMP24, PRRG4, CILP2, DSG3, NPPC, ADAMTS10, ADAMTS1, INS2, GDF15, UPK2, ADAM15, BMP6	1424	107	12826	1.85191	0.921288	0.0647053	8.62346
INTERPRO	IPR011701:Major facilitator superfamily	13	0.00646338	0.00134795	SLC16A13, SLC16A3, SLC45A3, SLC16A2, SLC16A5, SPNS2, SLC16A4, SLC45A1, SLC16A12, SLC37A2, SLC18A2, SLC43A2, SLC46A1	1356	41	12069	2.82209	0.921761	0.147216	2.27732
GOTERM_BP_DIRECT	GO:0032755~positive regulation of interleukin-6 production	11	0.00546902	0.00061177	DDX58, ARHGEF2, NOD1, ADORA2B, MAPK13, TLR2, TLR3, SPON2, TNFSF9, IL1A, IL6RA	1253	28	11126	3.48837	0.925103	0.127508	1.13771
KEGG_PATHWAY	mmu00590:Arachidonic acid metabolism	11	0.00546902	0.0095495	CYP2U1, PLA2G4A, PLA2G16, PTGIS, PTGS2, PTGES, CYP4F13, GGT1, LTC4S, CBR3, ALOX12	586	35	4605	2.46977	0.929906	0.198679	11.8969
UP_KEYWORDS	Homeobox	25	0.0124296	0.0068271	TSHZ3, CDX2, ONECUT1, IRX1, PAX6, HOXB13, PAX3, RHOX4B, RHOX4D, LHX2, PAX7, POU2F3, GBX1, POU3F1, DMBX1, GSC, NKX2-9, SIX3, ZHX2, EN1, VAX2, NKX6-1, HIPK2, RHOX12, CUX1	1424	128	12826	1.75918	0.931806	0.0665393	9.08729
GOTERM_BP_DIRECT	GO:0071805~potassium ion transmembrane transport	13	0.00646338	0.000647505	HPN, KCNC3, KCNB1, KCNJ11, PKD2L1, KCNS3, KCNT1, KCNF1, KCNQ2, HCN3, KCNQ1, KCNG1, KCNE4	1253	38	11126	3.03772	0.935628	0.128164	1.20378
GOTERM_MF_DIRECT	GO:0005509~calcium ion binding	62	0.0308254	0.00223641	SYT5, SUSD1, FAM20C, SYT8, FSTL1, DLK1, PSPH, CAMKK2, MMP24, EFHD2, SLC24A3, EEF2K, ADAM8, CIB2, CDH23, SCUBE3, NCALD, CRTAC1, CDHR1, DLL3, MMP15, MMP14, PKD2L1, SLIT3, RYR1, C2CD4C, CALR3, CHORDC1, FKBP10, AOC3, CDK5R1, ENPP1, CABP1, CDH4, MYL9, PRRG4, PRRG1, CALML3, COMP, PLCH2, MAN1A, FBN2, EGF, EHD4, TESC, CELSR2, ITPR3, S100A14, NOTCH1, FBLN1, PLA2G4A, SNED1, SULF2, DSG3, STAB1, FBLN7, CACNA…	1218	375	10722	1.45542	0.937169	0.158826	3.5677
UP_KEYWORDS	Hormone	11	0.00546902	0.00703788	FNDC5, PRL2C5, PRL6A1, STC2, PRL3D1, PRL4A1, NPPC, PRL8A9, STC1, PRL7D1, INS2	1424	38	12826	2.6073	0.93725	0.066874	9.35525
UP_KEYWORDS	LIM domain	14	0.00696057	0.00719819	MICALL2, ABLIM2, CRIP1, CRIP2, LMO4, FHL1, PDLIM4, LHX2, LIMCH1, PRICKLE2, ZFP185, TGFB1I1, TRIP6, TES	1424	56	12826	2.25176	0.941099	0.0667392	9.55855
UP_SEQ_FEATURE	domain:Ig-like C2-type	16	0.00795494	0.00096597	PTPRM, FLT3, SLAMF9, PTPRT, CNTFR, MMP23, IL6RA, LINGO1, UNC5A, SEMA4F, SEMA7A, SCN4B, IZUMO1, JAM2, JAM3, CD200	1272	57	11563	2.55169	0.944565	0.14845	1.72474
INTERPRO	IPR011161:MHC class I-like antigen recognition	8	0.00397747	0.0015543	H2-K1, H2-Q2, H2-Q4, GM11127, H2-D1, H2-T22, H2-T24, H2-Q7	1356	17	12069	4.18844	0.947047	0.158731	2.6216
GOTERM_BP_DIRECT	GO:0035988~chondrocyte proliferation	5	0.00248592	0.000726665	CTGF, GRN, STC1, HMGA2, MMP14	1253	5	11126	8.87949	0.953974	0.136358	1.35001
GOTERM_BP_DIRECT	GO:0002591~positive regulation of antigen processing and presentation of peptide antigen via MHC class I	5	0.00248592	0.000726665	ABCB9, ABCB1A, ABCB1B, TAP2, TAP1	1253	5	11126	8.87949	0.953974	0.136358	1.35001
GOTERM_MF_DIRECT	GO:0004812~aminoacyl-tRNA ligase activity	12	0.0059662	0.00254294	IARS, TARS, WARS, YARS, CARS, NARS, SARS, AARS, LARS, EPRS, EARS2, MARS	1218	38	10722	2.77988	0.957022	0.168997	4.04728
KEGG_PATHWAY	mmu00603:Glycosphingolipid biosynthesis - globo series	6	0.0029831	0.0119649	SEC1, GBGT1, HEXA, NAGA, FUT1, FUT2	586	12	4605	3.92918	0.96436	0.226232	14.6913
INTERPRO	IPR009003:Trypsin-like cysteine/serine peptidase domain	12	0.0059662	0.00184285	KLK6, HPN, KLK8, KLK4, FAM111A, C1RL, HTRA3, PRSS42, PRSS23, TMPRSS6, PRSS12, TMPRSS4	1356	37	12069	2.88663	0.969327	0.175993	3.10113
GOTERM_MF_DIRECT	GO:0043295~glutathione binding	7	0.00348028	0.00283035	GSS, GSTM2, GSR, PTGES, LTC4S, MGST1, GSTM7	1218	14	10722	4.40148	0.969901	0.176858	4.49492
GOTERM_MF_DIRECT	GO:0042608~T cell receptor binding	6	0.0029831	0.00288205	H2-K1, H2-Q2, H2-Q4, H2-D1, H2-Q7, EPS8L1	1218	10	10722	5.28177	0.971769	0.171183	4.57523
KEGG_PATHWAY	mmu05162:Measles	20	0.00994367	0.0128559	IFIH1, TLR2, OAS3, HSPA1A, HSPA1B, STAT1, STAT2, DDX58, CCNE1, TNFRSF10B, CCND2, IRF7, OAS1B, PIK3R5, OAS1A, EIF2AK2, OAS1G, MX2, IL1A, ADAR	586	88	4605	1.78599	0.972241	0.225868	15.7013
SMART	SM00013:LRRNT	8	0.00397747	0.00992251	VASN, LRRC3, LINGO1, FLRT1, PODN, LRIG1, SLIT3, PRELP	803	21	6550	3.10739	0.973214	0.303708	12.8139
UP_KEYWORDS	Potassium	15	0.00745775	0.00931955	KCNC3, ATP4A, KCNB1, ATP1A2, KCNJ11, KCNS3, KCNT1, SLC24A3, PKLR, KCNF1, KCNQ2, HCN3, KCNQ1, KCNG1, KCNE4	1424	64	12826	2.11102	0.974534	0.0836806	12.2093
SMART	SM01381:SM01381	9	0.00447465	0.0100896	EDNRB, S1PR1, ADORA2B, ADORA2A, CCR4, GPR50, LPAR2, ADRA2C, ADORA1	803	26	6550	2.82355	0.974805	0.28441	13.016
GOTERM_CC_DIRECT	GO:0031012~extracellular matrix	35	0.0174014	0.00630375	RARRES2, CLU, VIM, ADAMTS15, TGFB3, MMP23, PRDX1, MMP24, LGALS3BP, SERPINE2, COMP, TGFBI, ADAMTS10, FBN2, COL11A1, HSPA9, FGFBP3, LPL, ZP1, ADAMTS20, CRIP2, MMP15, MMP14, COL5A3, ECM1, COL5A1, PRELP, LAMA1, FBLN1, SFRP1, SERPINF1, ADAMTS1, TGFB1I1, BMP7, ADAMTS2	1326	197	11880	1.59175	0.974946	0.2058	8.88328
INTERPRO	IPR001523:Paired domain	5	0.00248592	0.00196838	PAX9, PAX7, PAX8, PAX6, PAX3	1356	6	12069	7.41704	0.975813	0.177898	3.30904
GOTERM_BP_DIRECT	GO:0035458~cellular response to interferon-beta	9	0.00447465	0.00091239	IFIT1, IRGM1, IRGM2, IGTP, TLR3, STAT1, GBP3, GBP2, AIM2	1253	20	11126	3.99577	0.979053	0.161143	1.69227
GOTERM_BP_DIRECT	GO:0007565~female pregnancy	15	0.00745775	0.000915527	H2-Q2, MUC1, PSG29, PGF, ENDOU, TGFB3, ITGA2, MAGED2, PSG22, PAPPA, ETS1, ADRA2C, FOSL1, HPGD, IGFBP5	1253	50	11126	2.66385	0.979329	0.155199	1.69804
GOTERM_BP_DIRECT	GO:0051607~defense response to virus	22	0.010938	0.000964064	APOBEC3, IFIH1, BST2, IFITM3, OAS3, TLR3, CRCP, STAT2, DDIT4, DDX58, IFIT1, IRF5, ISG15, OAS1B, OAS1A, EIF2AK2, SPON2, OAS1G, MX2, DHX58, ADAR, ZBP1	1253	91	11126	2.14669	0.983173	0.156503	1.7873
GOTERM_CC_DIRECT	GO:0045202~synapse	52	0.0258535	0.00699831	CADM1, SRCIN1, SYT5, CPEB3, GRIK3, WASF1, MYO7A, SYT8, ADORA1, SDC2, NRCAM, SYP, SH2D5, ANK2, ANK3, GRID1, CDH23, ARC, MAGI2, MADD, CRYAB, SDK2, BSN, DACT1, COLQ, SEMA4F, CNTN2, USH1C, OPHN1, NRGN, NRN1, CD24A, RIMS4, EPHB2, RGS12, HCN3, PRSS12, SYNPO, LRFN2, CPT1C, GABRE, GABRA4, KCNB1, SLC6A17, ATP1A2, IGSF9B, SHANK2, SAMD4, SYNGR3, SLC6A9, SARM1, DNM1	1326	324	11880	1.43791	0.983334	0.214036	9.81573
UP_SEQ_FEATURE	short sequence motif:"HIGH" region	8	0.00397747	0.00136955	IARS, WARS, YARS, CARS, LARS, EPRS, EARS2, MARS	1272	17	11563	4.27784	0.983459	0.194175	2.43698
UP_SEQ_FEATURE	domain:Ig-like C2-type 6	8	0.00397747	0.00136955	NRCAM, FLT1, ICAM5, FLT4, SDK2, CNTN2, L1CAM, KDR	1272	17	11563	4.27784	0.983459	0.194175	2.43698
GOTERM_BP_DIRECT	GO:0045766~positive regulation of angiogenesis	20	0.00994367	0.000975558	C3AR1, FLT1, ACVRL1, PGF, C3, CXCR2, PSG22, ECM1, EPHA1, PRKCB, KDR, PRKD1, PTGIS, ETS1, SFRP2, HIPK2, ENG, CTSH, IL1A, ALOX12	1253	79	11126	2.24797	0.983973	0.152395	1.80842
UP_SEQ_FEATURE	domain:SH2	18	0.0089493	0.00144252	ITK, FRK, VAV3, SOCS1, STAP2, SOCS5, STAT1, STAT2, TNS4, STAT6, SH2D5, SH2D6, CHN1, INPP5D, GRB7, SRMS, SH3BP2, BLNK	1272	71	11563	2.30461	0.986708	0.194288	2.56523
INTERPRO	IPR001128:Cytochrome P450	8	0.00397747	0.00229916	CYP2U1, CYP17A1, PTGIS, CYP11A1, CYP46A1, CYP4F16, CYP4F13, CYP26A1	1356	18	12069	3.95575	0.987069	0.195397	3.85489
INTERPRO	IPR011162:MHC classes I/II-like antigen recognition protein	8	0.00397747	0.00229916	H2-K1, H2-Q2, H2-Q4, GM11127, H2-D1, H2-T22, H2-T24, H2-Q7	1356	18	12069	3.95575	0.987069	0.195397	3.85489
INTERPRO	IPR003591:Leucine-rich repeat, typical subtype	21	0.0104409	0.00230116	VASN, LRRC3, FLRT1, PODN, RTN4RL1, LRRC8B, RXFP2, LRRC8D, TLR2, RTN4R, TLR3, LRIG1, LRRC15, SLIT3, PRELP, ELFN1, ELFN2, LINGO1, LGI2, LRRC9, LRFN2	1356	91	12069	2.05395	0.987118	0.18717	3.85817
KEGG_PATHWAY	mmu02010:ABC transporters	9	0.00447465	0.015779	ABCB9, ABCB1A, ABCB1B, TAP2, TAP1, ABCC3, ABCA1, ABCA4, ABCA3	586	27	4605	2.61945	0.987792	0.254506	18.9375
GOTERM_CC_DIRECT	GO:0043005~neuron projection	48	0.0238648	0.00779828	CADM1, PTGS2, STAR, SRCIN1, CPEB3, SYT5, CLU, VIM, FGF13, VGF, PSPH, NRADD, SDC3, SYP, NPTX1, ATP2B4, ANK3, AVIL, ENO2, RAP1GAP2, FOSL1, MICALL2, SGK1, MAGI2, STMN3, KIF5A, CPNE5, SLC6A12, AK1, KCNB1, MET, FZD1, RTN4R, BSN, PTPN13, ATP1A2, SHANK2, SAMD4, KDR, GRM4, RGS2, ZWINT, P2RX3, SLC18A2, CNTN2, STMN1, CUX1, CACNA1B	1326	296	11880	1.45286	0.989582	0.223973	10.8786
KEGG_PATHWAY	mmu05330:Allograft rejection	6	0.0029831	0.017449	H2-K1, H2-Q2, H2-D1, H2-T22, H2-T24, H2-Q7	586	13	4605	3.62694	0.992373	0.262694	20.7344
KEGG_PATHWAY	mmu05320:Autoimmune thyroid disease	6	0.0029831	0.017449	H2-K1, H2-Q2, H2-D1, H2-T22, H2-T24, H2-Q7	586	13	4605	3.62694	0.992373	0.262694	20.7344
UP_SEQ_FEATURE	domain:Fibronectin type-III	11	0.00546902	0.00165434	VASN, TRIM46, ELFN1, FNDC4, ELFN2, FNDC5, MDGA1, MID1, MID2, LRFN2, IL6RA	1272	32	11563	3.12483	0.992956	0.210202	2.93664
KEGG_PATHWAY	mmu04060:Cytokine-cytokine receptor interaction	21	0.0104409	0.0178435	IL1R2, OSMR, LEPR, TGFB3, CXCR2, CNTFR, TNFSF9, CCL28, IL17RA, IL6RA, TNFRSF11A, TNFRSF10B, IL12RB1, CCR4, IL10RA, IL1RAP, CXCR6, BMP7, LTB, IL1A, IL3RA	586	97	4605	1.70129	0.993176	0.254253	21.1535
SMART	SM00389:HOX	24	0.0119324	0.0136762	DMBX1, TSHZ3, CDX2, GSC, ONECUT1, NKX2-9, IRX1, SIX3, PAX6, ZHX2, HOXB13, VAX2, EN1, PAX3, NKX6-1, RHOX4B, RHOX4D, LHX2, POU2F3, PAX7, GBX1, POU3F1, RHOX12, CUX1	803	117	6550	1.67321	0.993253	0.340688	17.2509
INTERPRO	IPR017972:Cytochrome P450, conserved site	7	0.00348028	0.00267711	CYP2U1, CYP17A1, CYP11A1, CYP46A1, CYP4F16, CYP4F13, CYP26A1	1356	14	12069	4.45022	0.993679	0.205605	4.47502
UP_SEQ_FEATURE	domain:EGF-like 6	10	0.00497183	0.00169363	NOTCH1, SNED1, SCUBE3, STAB1, DLL3, FBN2, DLK1, MEGF6, EGF, SLIT3	1272	27	11563	3.36682	0.993738	0.205948	3.00538
KEGG_PATHWAY	mmu04151:PI3K-Akt signaling pathway	43	0.0213789	0.018149	PGF, OSMR, ITGA11, TLR2, ITGB4, FGF13, LPAR2, CCNE1, COMP, CREB3L1, PIK3R5, CREB3L4, PIK3AP1, CREB3L3, EGF, MYB, PPP2R2C, COL11A1, SYK, SGK1, FLT1, SGK2, FLT4, MET, ITGA2, ITGA4, COL5A3, PCK2, COL5A1, PCK1, DDIT4, IL6RA, KDR, LAMA1, CDKN1A, LPAR5, CCND2, LPAR6, PDGFRB, LAMC2, INS2, IL3RA, ITGA2B	586	241	4605	1.40211	0.993739	0.24562	21.4767
KEGG_PATHWAY	mmu00970:Aminoacyl-tRNA biosynthesis	12	0.0059662	0.0188541	IARS, TARS, WARS, YARS, CARS, NARS, SARS, AARS, LARS, EPRS, EARS2, MARS	586	44	4605	2.14319	0.994869	0.242322	22.2178
GOTERM_MF_DIRECT	GO:0005251~delayed rectifier potassium channel activity	7	0.00348028	0.00426878	KCNS3, KCNC3, KCNB1, KCNF1, KCNQ2, KCNQ1, KCNG1	1218	15	10722	4.10805	0.994946	0.232315	6.70597
KEGG_PATHWAY	mmu04742:Taste transduction	5	0.00248592	0.0191945	GRM4, TRPM5, ITPR3, SCNN1B, SCNN1A	586	9	4605	4.36576	0.995339	0.23542	22.5733
GOTERM_BP_DIRECT	GO:0007399~nervous system development	48	0.0238648	0.00126932	NRP2, NRP1, BRSK2, L1CAM, FGF13, TTLL7, PAX3, ZIC1, NRN1, SLC7A5, SDC2, EPHB2, SERPINE2, CRMP1, LHX2, SEMA7A, AVIL, ATOH8, CHD5, SIM2, INSM1, MAGI2, BEND6, MDGA1, EFNB2, DPYSL5, DLL3, PHF10, DPYSL3, HES6, ELAVL3, IGSF9B, GAS7, RUFY3, SLIT3, PRKD1, FEZF1, SEMA6B, DACT1, SEMA6C, SARM1, NAV1, SEMA4F, ULK2, CHN1, OPHN1, STMN1, CLN8	1253	268	11126	1.59036	0.995387	0.186886	2.34688
UP_SEQ_FEATURE	propeptide:Removed in mature form	28	0.0139211	0.00180075	ALPL, RTN4RL1, VTCN1, CD52, CNTFR, NRN1, CD24A, GPC4, PTGIR, DIRAS1, DIRAS2, ISG15, SEMA7A, RASL10B, VNN1, RHOD, ZP1, BST2, MDGA1, MFI2, RTN4R, PSMB8, PSMB9, RAB30, RAB37, CNTN2, GBP2, GFRA3	1272	137	11563	1.85789	0.995459	0.209068	3.19257
GOTERM_MF_DIRECT	GO:0046977~TAP binding	5	0.00248592	0.00435623	H2-K1, H2-Q2, H2-Q4, H2-D1, H2-Q7	1218	7	10722	6.28783	0.995466	0.226597	6.83883
GOTERM_MF_DIRECT	GO:0005267~potassium channel activity	11	0.00546902	0.00437681	KCNS3, KCNC3, TRPM5, KCNT1, KCNB1, KCNF1, KCNQ2, KCNQ1, HCN3, KCNG1, KCNE4	1218	35	10722	2.76664	0.99558	0.218419	6.87008
UP_SEQ_FEATURE	domain:Paired	5	0.00248592	0.00181558	PAX9, PAX7, PAX8, PAX6, PAX3	1272	6	11563	7.57534	0.995656	0.202779	3.21845
UP_KEYWORDS	Cell junction	66	0.0328141	0.0138412	CLDN7, KCNC3, SRCIN1, CADM1, SYT5, CPEB3, WASF1, GRIK3, GJA4, SYP, ANK2, SH2D5, ANK3, TRPV4, GRID1, ARC, ARHGEF2, MAGI2, SDK2, ARHGEF5, BSN, TNS4, DACT1, EVPL, XIRP1, COLQ, CGN, OPHN1, NRGN, TGFB1I1, JAM2, JAM3, ADAM15, ITGB4, NRN1, RIMS4, GJC1, ESPN, RGS12, PPL, SYNPO, LRFN2, TES, MICALL2, CPT1C, PARD6A, GABRE, DIXDC1, FLRT1, GABRA4, KCNB1, SLC6A17, IGSF9B, SHANK2, SAMD4, RUFY3, CLDN23, SYNGR3, …	1424	448	12826	1.32693	0.995762	0.119321	17.6206
KEGG_PATHWAY	mmu00980:Metabolism of xenobiotics by cytochrome P450	9	0.00447465	0.0197059	GSTM1, MGST3, GSTM2, GSTK1, EPHX1, GSTO2, CBR3, MGST1, GSTM7	586	28	4605	2.5259	0.995966	0.230893	23.1044
GOTERM_BP_DIRECT	GO:0031018~endocrine pancreas development	9	0.00447465	0.00132981	HES1, INSM1, FOXA2, ONECUT1, FOXA3, CLU, PKLR, NKX6-1, IL6RA	1253	21	11126	3.8055	0.996431	0.18838	2.45742
SMART	SM00132:LIM	14	0.00696057	0.0156872	MICALL2, ABLIM2, CRIP1, CRIP2, LMO4, FHL1, PDLIM4, LHX2, LIMCH1, PRICKLE2, ZFP185, TGFB1I1, TRIP6, TES	803	56	6550	2.03923	0.996784	0.356933	19.5411
SMART	SM00219:TyrKc	15	0.00745775	0.015798	ITK, FRK, FLT1, FLT3, FLT4, MET, EPHA1, EPHB4, EPHB2, KDR, PDGFRB, TNK1, MERTK, SRMS, SYK	803	62	6550	1.97345	0.996913	0.338265	19.6656
GOTERM_CC_DIRECT	GO:0005891~voltage-gated calcium channel complex	6	0.0029831	0.0102237	PDE4B, CACNA1G, PDE4D, CACNA1E, CACNA2D2, CACNA1B	1326	13	11880	4.13505	0.997499	0.270446	14.0304
SMART	SM00643:C345C	5	0.00248592	0.0169248	SFRP5, SFRP1, C3, SFRP2, ADAMTSL5	803	9	6550	4.53162	0.997963	0.338395	20.9211
GOTERM_CC_DIRECT	GO:0030057~desmosome	7	0.00348028	0.0108163	EVPL, DSG3, PPL, PKP3, TCHP, JAM3, CDSN	1326	18	11880	3.48416	0.998236	0.271678	14.7845
UP_KEYWORDS	Ligand-gated ion channel	8	0.00397747	0.0162249	TRPM5, GABRA4, P2RX3, GRIK3, RYR1, ITPR3, HCN3, GRID1	1424	25	12826	2.88225	0.998359	0.135613	20.3471
GOTERM_CC_DIRECT	GO:0030425~dendrite	50	0.0248592	0.0110246	ZFP385A, ACVRL1, CADM1, SRCIN1, CPEB3, GRIK3, CRCP, L1CAM, FGF13, TTLL7, ADORA1, SLC1A4, ANK3, TUBB3, MAGI2, TRPM5, BSN, SMO, ZWINT, OPHN1, GRIP2, SGCE, NRGN, COBL, CDK5R1, CLCN2, RAP1GAP, ADORA2A, EPHB2, ALCAM, RGS12, CRMP1, HCN3, KIF21B, GCHFR, PRSS12, SYNPO, CPT1C, KCNB1, MET, DPYSL5, ITPR3, STAT1, IGSF9B, SAMD4, RUFY3, ELFN1, SARM1, CACNA1G, CACNA1B	1326	317	11880	1.41314	0.99844	0.264911	15.0481
GOTERM_BP_DIRECT	GO:0019228~neuronal action potential	6	0.0029831	0.00152749	P2RX5, ANK3, P2RX3, MYH14, DPP6, SCN5A	1253	9	11126	5.91966	0.998457	0.206427	2.8178
GOTERM_BP_DIRECT	GO:0007169~transmembrane receptor protein tyrosine kinase signaling pathway	18	0.0089493	0.00157825	ITK, FRK, FLT1, FLT3, FLT4, MET, PTPRT, EPHB4, EPHA1, EPHB2, KDR, EPHB6, SH2D6, PDGFRB, TNK1, SRMS, SYK, GFRA3	1253	70	11126	2.2833	0.998756	0.205991	2.91013
KEGG_PATHWAY	mmu05204:Chemical carcinogenesis	9	0.00447465	0.0242817	GSTM1, MGST3, GSTM2, PTGS2, GSTK1, EPHX1, GSTO2, MGST1, GSTM7	586	29	4605	2.4388	0.998896	0.266187	27.7099
UP_KEYWORDS	Calcium channel	9	0.00447465	0.0172284	TRPM6, RYR1, CACNA1G, TRPV4, CACNA1E, ITPR3, CACNA2D2, PKD2L1, CACNA1B	1424	31	12826	2.61494	0.9989	0.140484	21.4696
UP_KEYWORDS	Nitration	10	0.00497183	0.0174396	LPL, PRPH, CRMP1, ACAP1, VIM, TUBA4A, DPYSL3, CPT1A, DNM1, MGST1	1424	37	12826	2.43433	0.998989	0.139229	21.704
GOTERM_CC_DIRECT	GO:0031988~membrane-bounded vesicle	5	0.00248592	0.0122342	SLC26A6, SYT8, GGT1, BMP7, BMP6	1326	9	11880	4.97738	0.999236	0.278344	16.5639
UP_SEQ_FEATURE	domain:Helix-loop-helix motif	16	0.00795494	0.0024106	MITF, MLXIPL, HES6, AHR, MXD4, HES1, NPAS2, AHRR, BHLHA15, HEYL, HIF3A, ATOH8, ID3, BHLHE41, SCX, SIM2	1272	62	11563	2.34591	0.999271	0.250947	4.25178
UP_KEYWORDS	Sodium channel	5	0.00248592	0.0182841	SCN4B, SCNN1B, SCNN1A, SCN5A, HCN3	1424	10	12826	4.50351	0.999278	0.142649	22.6346
GOTERM_BP_DIRECT	GO:0007166~cell surface receptor signaling pathway	25	0.0124296	0.00171008	EDN3, HAX1, OSMR, TSPAN5, FGFRL1, MAPKAPK3, L1CAM, CXCR2, VIPR2, CD24A, TSPAN12, SYK, VASN, FZD1, PROKR1, CELSR2, EPHA1, TSPAN17, FCGR3, P2RX5, LAMA1, SMO, CD37, GPR50, GLP1R	1253	114	11126	1.94726	0.999289	0.21464	3.14955
UP_KEYWORDS	Synapse	35	0.0174014	0.018493	KCNC3, CADM1, SRCIN1, CPEB3, SYT5, GRIK3, WASF1, NRN1, RIMS4, SYP, RGS12, SH2D5, ANK2, ANK3, GRID1, LRFN2, SYNPO, CPT1C, GABRE, ARC, MAGI2, GABRA4, KCNB1, SDK2, BSN, SLC6A17, IGSF9B, SHANK2, SAMD4, SYNGR3, DACT1, SARM1, COLQ, OPHN1, NRGN	1424	213	12826	1.48003	0.999336	0.14139	22.8633
INTERPRO	IPR024079:Metallopeptidase, catalytic domain	13	0.00646338	0.00391381	ADAMTS14, ADAMTS20, ADAMTS15, MMP15, MMP23, MMP14, MMP24, PAPPA, ADAMTS10, ADAMTS1, ADAM8, ADAMTS2, ADAM15	1356	46	12069	2.51534	0.999393	0.275355	6.478
INTERPRO	IPR013273:Peptidase M12B, ADAM-TS	7	0.00348028	0.00404201	ADAMTS14, ADAMTS20, ADAMTSL5, ADAMTS15, ADAMTS10, ADAMTS1, ADAMTS2	1356	15	12069	4.15354	0.999524	0.272968	6.68334
INTERPRO	IPR011598:Myc-type, basic helix-loop-helix (bHLH) domain	16	0.00795494	0.00410778	MITF, MLXIPL, HES6, AHR, MXD4, HES1, NPAS2, AHRR, BHLHA15, HEYL, HIF3A, ATOH8, ID3, BHLHE41, SCX, SIM2	1356	64	12069	2.22511	0.99958	0.267303	6.78853
GOTERM_BP_DIRECT	GO:0002040~sprouting angiogenesis	9	0.00447465	0.00188581	NOTCH1, FLT1, NRP1, NRARP, PGF, FLT4, E2F8, ENG, RNF213	1253	22	11126	3.63252	0.999662	0.227303	3.46783
GOTERM_BP_DIRECT	GO:0030855~epithelial cell differentiation	14	0.00696057	0.00192651	MUC1, ALDOC, FZD1, TBX1, WT1, CPT1A, CASP6, HNRNPH3, TAGLN, GSTK1, TGFB1I1, ID3, BMP7, UPK2	1253	48	11126	2.58985	0.999716	0.225244	3.5414
GOTERM_MF_DIRECT	GO:0005044~scavenger receptor activity	8	0.00397747	0.00659418	LGALS3BP, ENPP1, STAB1, ENDOU, SUSD2, SCARA5, PRSS12, TMPRSS4	1218	21	10722	3.35351	0.999719	0.299204	10.1791
INTERPRO	IPR001791:Laminin G domain	10	0.00497183	0.00440854	LAMA1, COL22A1, CELSR2, BC067074, COL16A1, COL5A3, COL11A1, COL20A1, COL5A1, SLIT3	1356	30	12069	2.96681	0.999763	0.274581	7.26813
GOTERM_BP_DIRECT	GO:0002489~antigen processing and presentation of endogenous peptide antigen via MHC class Ib via ER pathway, TAP-dependent	5	0.00248592	0.00198509	ABCB9, ABCB1A, ABCB1B, TAP2, TAP1	1253	6	11126	7.39957	0.999779	0.225089	3.64721
UP_SEQ_FEATURE	repeat:LRR 10	14	0.00696057	0.00281241	VASN, PODN, LRRC8B, RXFP2, LRRC8D, TLR2, RTN4R, LRIG1, TLR3, LRRC15, PRELP, SLIT3, LINGO1, LRRC9	1272	51	11563	2.49541	0.999782	0.2769	4.94367
PIR_SUPERFAMILY	PIRSF000666:tyrosine-protein kinase, ephrin receptor type	4	0.00198873	0.0604816	EPHB6, EPHB4, EPHA1, EPHB2	152	8	1256	4.13158	0.999806	0.999806	51.9687
INTERPRO	IPR018114:Peptidase S1, trypsin family, active site	9	0.00447465	0.0046305	KLK6, HPN, KLK8, KLK4, PRSS42, PRSS23, TMPRSS6, PRSS12, TMPRSS4	1356	25	12069	3.20416	0.999844	0.277267	7.62057
GOTERM_CC_DIRECT	GO:0030670~phagocytic vesicle membrane	10	0.00497183	0.0150636	H2-K1, RAB32, IRGM1, RAB43, TAP1, H2-D1, TLR2, RAB39, H2-Q7, TAPBP	1326	36	11880	2.48869	0.999856	0.319368	20.0116
KEGG_PATHWAY	mmu00982:Drug metabolism - cytochrome P450	8	0.00397747	0.0317191	GSTM1, MGST3, GSTM2, FMO5, GSTK1, GSTO2, MGST1, GSTM7	586	25	4605	2.51468	0.999867	0.321722	34.655
SMART	SM00020:Tryp_SPc	9	0.00447465	0.0243262	KLK6, HPN, KLK8, KLK4, C1RL, PRSS42, TMPRSS6, PRSS12, TMPRSS4	803	30	6550	2.44707	0.999869	0.428062	28.7263
UP_KEYWORDS	Iron transport	7	0.00348028	0.0231049	MFI2, STEAP2, STEAP1, SCARA5, SLC40A1, SFXN5, TRF	1424	21	12826	3.00234	0.999895	0.170563	27.7538
GOTERM_BP_DIRECT	GO:0007204~positive regulation of cytosolic calcium ion concentration	17	0.00845212	0.00218478	C3AR1, GNA15, KNG2, PTGER4, CXCR2, ITPR3, CCL28, CD24A, KDR, EDNRA, EDNRB, PTGIR, GPR35, CACNA1G, TRPV4, CIB2, GLP1R	1253	66	11126	2.28714	0.999905	0.238474	4.00704
UP_KEYWORDS	Sodium	13	0.00646338	0.0235201	SLC38A4, SLC5A5, TNFRSF11A, SLC24A3, COMMD3, SCN4B, SLC13A3, SLC22A5, ATP1A2, SCNN1B, SCNN1A, SCN5A, HCN3	1424	58	12826	2.01882	0.999911	0.170225	28.1797
SMART	SM00137:MAM	5	0.00248592	0.0255202	NRP2, PTPRM, NRP1, MDGA1, PTPRT	803	10	6550	4.07846	0.999916	0.424205	29.9164
SMART	SM00082:LRRCT	10	0.00497183	0.0261701	VASN, ELFN1, FLRT1, TLR2, LRIG1, TLR3, LGI2, LRRC15, LRFN2, SLIT3	803	36	6550	2.26581	0.999934	0.414209	30.5564
UP_KEYWORDS	Amino-acid transport	8	0.00397747	0.0246468	SLC38A4, SLC6A9, SLC7A3, SLC7A2, SLC7A1, SLC3A2, SLC7A5, SLC7A7	1424	27	12826	2.66875	0.999944	0.174541	29.3236
GOTERM_BP_DIRECT	GO:0032967~positive regulation of collagen biosynthetic process	8	0.00397747	0.00232846	WNT4, CTGF, TGFB3, PDGFRB, ITGA2, CREB3L1, SCX, ENG	1253	18	11126	3.94644	0.999948	0.245781	4.26517
KEGG_PATHWAY	mmu04960:Aldosterone-regulated sodium reabsorption	9	0.00447465	0.0355612	SGK1, NR3C2, PIK3R5, INS2, SFN, ATP1A2, SCNN1B, SCNN1A, PRKCB	586	31	4605	2.28146	0.999956	0.341579	37.996
GOTERM_MF_DIRECT	GO:0042626~ATPase activity, coupled to transmembrane movement of substances	9	0.00447465	0.00827034	ABCB9, ABCB1A, ABCB1B, TAP2, TAP1, ABCC3, ABCA1, ABCA4, ABCA3	1218	27	10722	2.93432	0.999965	0.347989	12.6069
INTERPRO	IPR001254:Peptidase S1	10	0.00497183	0.00560464	KLK6, HPN, KLK8, KLK4, C1RL, PRSS42, PRSS23, TMPRSS6, PRSS12, TMPRSS4	1356	31	12069	2.87111	0.999976	0.315575	9.15255
BIOCARTA	m_nuclearRsPathway:Nuclear Receptors in Lipid Metabolism and Toxicity	5	0.00248592	0.0577347	ABCB1A, ABCB1B, ABCC3, CYP26A1, ABCA1	116	13	968	3.20955	0.999979	0.995401	51.9621
GOTERM_CC_DIRECT	GO:0042612~MHC class I protein complex	5	0.00248592	0.0186137	H2-K1, H2-Q2, H2-Q4, H2-D1, H2-Q7	1326	10	11880	4.47964	0.999983	0.366452	24.1498
KEGG_PATHWAY	mmu05321:Inflammatory bowel disease (IBD)	8	0.00397747	0.038818	STAT6, MAF, IL12RB1, TGFB3, TLR2, STAT1, IL1A, NFATC1	586	26	4605	2.41796	0.999983	0.355109	40.7037
GOTERM_MF_DIRECT	GO:0000978~RNA polymerase II core promoter proximal region sequence-specific DNA binding	44	0.0218761	0.00912162	AKNA, GLIS3, FOSL2, NDN, FOXA2, UTY, NR6A1, E2F8, MITF, PAX6, ZKSCAN3, ZIC1, NR2C1, GATA1, CHD7, LHX2, POU2F3, PAX8, OVOL1, BHLHE41, NFATC2, MYB, FOSL1, NFATC1, ZBTB7B, KLF5, INSM1, SOX10, FOXJ2, FOXJ1, RFX5, CEBPG, NKX2-9, MLXIPL, TEAD1, EN1, STAT1, DDIT3, NKX6-1, FEZF1, PRDM1, NFE2L3, NFIC, NFIB	1218	264	10722	1.46716	0.999988	0.364309	13.8162
INTERPRO	IPR027359:Voltage-dependent potassium channel, four helix bundle domain	9	0.00447465	0.00604164	KCNS3, KCNC3, KCNB1, CACNA1G, KCNF1, CACNA1E, SCN5A, KCNG1, CACNA1B	1356	26	12069	3.08092	0.999989	0.32614	9.83199
SMART	SM00338:BRLZ	11	0.00546902	0.0316558	ATF6, MAF, ATF5, FOSL2, CEBPG, CREB3L1, CREB3L4, CREB3L3, NFE2L3, FOSL1, DDIT3	803	43	6550	2.08665	0.999992	0.459128	35.7466
INTERPRO	IPR000372:Leucine-rich repeat-containing N-terminal	8	0.00397747	0.00621378	VASN, LRRC3, LINGO1, FLRT1, PODN, LRIG1, SLIT3, PRELP	1356	21	12069	3.39064	0.999992	0.324621	10.0983
GOTERM_MF_DIRECT	GO:0001078~transcriptional repressor activity, RNA polymerase II core promoter proximal region sequence-specific binding	20	0.00994367	0.00954866	INSM1, TSHZ3, GLIS3, E2F8, MLXIPL, EN1, HMGA2, ZKSCAN3, NKX6-1, NR2C1, STAT6, HES1, GATA1, BTG2, ZFP90, OVOL1, PRDM1, BHLHE41, NFE2L3, NFATC2	1218	95	10722	1.85325	0.999993	0.366256	14.4169
UP_KEYWORDS	Inflammatory response	13	0.00646338	0.0300628	PRKD1, RARRES2, SMPDL3B, C3, STAB1, SEMA7A, IL1RAP, TLR2, TLR3, IL17RE, KDM6B, AIM2, IL1A	1424	60	12826	1.95152	0.999994	0.205549	34.5902
GOTERM_MF_DIRECT	GO:0046982~protein heterodimerization activity	59	0.0293338	0.00974626	PRPH, SYT5, PGF, HEXA, ANO1, H2-D1, TLR2, TGFB3, LTC4S, ADORA1, GSTM1, GSTM2, HIST3H2A, CREB3L3, BHLHE41, SCX, H2-K1, ATP4A, DMRT3, MLXIPL, ZHX2, HES6, DDIT3, AHR, MAPK4, BIN1, JAM2, JAM3, AOC3, BID, ADORA2A, ABTB2, NR3C2, SYCP2, NRN1, TAP2, TAP1, ENO2, ADRA2C, SIM2, H2-Q2, DMBX1, MAF, IKZF4, H2-Q4, KCNB1, CEBPG, MET, FZD1, ITGA2, MID1, H2-Q7, SGTB, MID2, ATF6, NOTCH1, HEYL, BMP6, BTBD11	1218	378	10722	1.37401	0.999994	0.361319	14.6935
KEGG_PATHWAY	mmu04360:Axon guidance	21	0.0104409	0.0427653	ABLIM2, NRP1, PLXNA1, GNAI1, EFNB2, MET, DPYSL5, L1CAM, EPHB4, EPHA1, EPHB2, SLIT3, PAK6, EPHB6, SEMA6B, SEMA6C, UNC5A, SEMA4F, SEMA7A, RHOD, NFATC2	586	106	4605	1.55685	0.999994	0.372269	43.8388
INTERPRO	IPR013098:Immunoglobulin I-set	19	0.00944649	0.00639105	FLT1, PSG29, CADM1, FLT4, SDK2, PRTG, FGFRL1, LRIG1, L1CAM, PSG22, KDR, NRCAM, LINGO1, UNC5A, MYOM3, KIRREL, CDON, CNTN2, LRFN2	1356	86	12069	1.96638	0.999995	0.323411	10.3718
GOTERM_MF_DIRECT	GO:0005179~hormone activity	11	0.00546902	0.00996837	EDN3, FNDC5, PRL6A1, STC2, PRL3D1, PRL4A1, NPPC, PRL8A9, STC1, PRL7D1, INS2	1218	39	10722	2.48288	0.999996	0.357405	15.0035
GOTERM_MF_DIRECT	GO:0001077~transcriptional activator activity, RNA polymerase II core promoter proximal region sequence-specific binding	34	0.0169042	0.0103724	AKNA, GLIS3, NDN, ONECUT1, FOXA2, NR6A1, MITF, PAX6, ZIC1, WT1, GATA1, STAT6, LHX2, POU2F3, PAX8, CREB3L1, NFATC2, MYB, FOSL1, NFATC1, ZBTB7B, KLF5, FOXJ2, FOXJ1, CEBPG, NKX2-9, FOXA1, TEAD1, HMGA2, DDIT3, HEYL, FOXC2, NFIC, NFIB	1218	193	10722	1.55078	0.999997	0.358783	15.5646
UP_KEYWORDS	Calcium transport	12	0.0059662	0.0326422	ATP2C2, TRPM6, ATP2B4, SLC24A3, RYR1, CACNA1G, TRPV4, CACNA1E, ITPR3, CACNA2D2, PKD2L1, CACNA1B	1424	54	12826	2.00156	0.999998	0.217653	36.9682
UP_KEYWORDS	Sodium transport	12	0.0059662	0.0326422	SLC38A4, SLC5A5, SLC24A3, COMMD3, SCN4B, SLC13A3, SLC22A5, ATP1A2, SCNN1B, SCNN1A, SCN5A, HCN3	1424	54	12826	2.00156	0.999998	0.217653	36.9682
BIOCARTA	m_mrpPathway:Multi-Drug Resistance Factors	3	0.00149155	0.0714972	ABCB1A, ABCB1B, ABCC3	116	4	968	6.25862	0.999999	0.988617	59.9315
UP_KEYWORDS	Heme	13	0.00646338	0.0337846	CYP2U1, NPAS2, CYP17A1, PTGIS, CYP11A1, CYP46A1, PTGS2, CYP4F16, CYP4F13, CYP26A1, STEAP2, STEAP1, MB	1424	61	12826	1.91953	0.999999	0.220802	37.9956
INTERPRO	IPR001400:Somatotropin hormone	6	0.0029831	0.00711876	PRL2C5, PRL6A1, PRL3D1, PRL4A1, PRL8A9, PRL7D1	1356	12	12069	4.45022	0.999999	0.34409	11.4863
UP_KEYWORDS	Chemotaxis	9	0.00447465	0.0345937	C3AR1, RARRES2, FLT1, S1PR1, ECSCR, PDGFRB, CXCR2, CCL28, CMTM5	1424	35	12826	2.31609	0.999999	0.221919	38.7138
GOTERM_MF_DIRECT	GO:0004364~glutathione transferase activity	8	0.00397747	0.0113593	GSTM1, MGST3, GSTM2, GSTK1, GSTO2, LTC4S, MGST1, GSTM7	1218	23	10722	3.0619	0.999999	0.375423	16.9205
GOTERM_MF_DIRECT	GO:0008146~sulfotransferase activity	8	0.00397747	0.0113593	SULT4A1, HS3ST6, CHST10, CHST8, HS3ST1, CHST3, HS6ST1, HS3ST3B1	1218	23	10722	3.0619	0.999999	0.375423	16.9205
GOTERM_BP_DIRECT	GO:0006952~defense response	8	0.00397747	0.00333274	IRGM1, IRGM2, IGTP, NOD1, TAP1, H2-D1, TLR3, TAPBP	1253	19	11126	3.73873	0.999999	0.324779	6.0511
KEGG_PATHWAY	mmu04020:Calcium signaling pathway	21	0.0104409	0.0506975	ADCY1, GNA15, ADORA2B, ADORA2A, PHKA1, ITPR3, PRKCB, P2RX5, PPIF, EDNRA, GNAL, EDNRB, ATP2B4, CALML3, PDE1C, P2RX3, CACNA1G, RYR1, PDGFRB, CACNA1E, CACNA1B	586	108	4605	1.52801	0.999999	0.413608	49.681
INTERPRO	IPR001824:Tyrosine-protein kinase, receptor class III, conserved site	5	0.00248592	0.00762911	FLT1, FLT3, FLT4, PDGFRB, KDR	1356	8	12069	5.56278	0.999999	0.354921	12.2601
INTERPRO	IPR020635:Tyrosine-protein kinase, catalytic domain	15	0.00745775	0.00773134	ITK, FRK, FLT1, FLT3, FLT4, MET, EPHA1, EPHB4, EPHB2, KDR, PDGFRB, TNK1, MERTK, SRMS, SYK	1356	62	12069	2.15333	1	0.350279	12.4144
INTERPRO	IPR001356:Homeodomain	24	0.0119324	0.00774559	DMBX1, TSHZ3, CDX2, GSC, ONECUT1, NKX2-9, IRX1, SIX3, PAX6, ZHX2, HOXB13, VAX2, EN1, PAX3, NKX6-1, RHOX4B, RHOX4D, LHX2, POU2F3, PAX7, GBX1, POU3F1, RHOX12, CUX1	1356	121	12069	1.76538	1	0.342735	12.4358
GOTERM_BP_DIRECT	GO:0032355~response to estradiol	17	0.00845212	0.00353682	TXNIP, BID, FOSL2, PTGS2, CRYAB, FOXA1, MBD4, MMP15, CTGF, ETS1, GRN, TFPI, PDGFRB, WFDC1, NQO1, BMP7, WNT7A	1253	69	11126	2.1877	1	0.333383	6.41014
INTERPRO	IPR001781:Zinc finger, LIM-type	14	0.00696057	0.00793107	MICALL2, ABLIM2, CRIP1, CRIP2, LMO4, FHL1, PDLIM4, LHX2, LIMCH1, PRICKLE2, ZFP185, TGFB1I1, TRIP6, TES	1356	56	12069	2.22511	1	0.341519	12.715
UP_KEYWORDS	EGF-like domain	21	0.0104409	0.0379705	VASN, SCUBE3, CRTAC1, SUSD1, DLL3, TMEM8, CELSR2, DLK1, MUC4, SLIT3, FBLN1, NOTCH1, SNED1, STAB1, COMP, FBLN7, FBN2, ADAM8, MEGF6, EGF, ADAM15	1424	119	12826	1.58947	1	0.237362	41.6286
GOTERM_MF_DIRECT	GO:0030368~interleukin-17 receptor activity	4	0.00198873	0.0122247	IL17RE, IL17RC, IL17RD, IL17RA	1218	5	10722	7.04236	1	0.387627	18.0927
GOTERM_CC_DIRECT	GO:0005797~Golgi medial cisterna	6	0.0029831	0.0261433	H2-K1, H2-Q2, ST6GAL1, H2-Q4, H2-D1, H2-Q7	1326	16	11880	3.35973	1	0.460856	32.275
INTERPRO	IPR010294:ADAM-TS Spacer 1	7	0.00348028	0.00820893	ADAMTS14, ADAMTS20, ADAMTSL5, ADAMTS15, ADAMTS10, ADAMTS1, ADAMTS2	1356	17	12069	3.66489	1	0.343497	13.1316
SMART	SM00252:SH2	17	0.00845212	0.0421211	ITK, FRK, VAV3, SOCS1, STAP2, SOCS5, STAT2, TNS4, STAT6, SH2D6, CHN1, INPP5D, GRB7, SRMS, SYK, BLNK, SH3BP2	803	83	6550	1.67069	1	0.542083	44.6646
GOTERM_MF_DIRECT	GO:0030881~beta-2-microglobulin binding	5	0.00248592	0.0130091	H2-K1, H2-Q2, H2-Q4, H2-D1, H2-Q7	1218	9	10722	4.89053	1	0.39696	19.1417
SMART	SM00218:ZU5	4	0.00198873	0.0437963	ANK2, UNC5A, ANK3, UNC5CL	803	7	6550	4.66109	1	0.538895	45.9806
GOTERM_CC_DIRECT	GO:0045121~membrane raft	30	0.0149155	0.0283277	LDHB, ADCY1, RTN4RL1, MAL2, GNAI1, TLR2, H2-D1, L1CAM, ABCA1, CD24A, SERPINH1, EDNRA, STAT6, EFHD2, EDNRB, UNC5A, KIRREL, INPP5D, KCNQ1, ICAM1, BST2, MDGA1, MAL, NFAM1, RGS16, KDR, STOM, PROM2, P2RX3, PDZK1	1326	181	11880	1.48496	1	0.475004	34.4757
UP_KEYWORDS	Microsome	13	0.00646338	0.0421904	CYP2U1, PTGS2, CYP46A1, CLU, FBXO2, CYP26A1, EPHX1, MGST3, FMO5, SLC26A6, OAS1A, MGST1, ACSL6	1424	63	12826	1.85859	1	0.256547	45.0904
GOTERM_BP_DIRECT	GO:0007409~axonogenesis	18	0.0089493	0.00400244	RAB3A, ADCY1, KLF7, NDN, NKX2-9, PAX6, BRSK2, RTN4R, CNP, VAX2, NRN1, LINGO1, NOTCH1, ANK3, ULK2, CNTN2, STMN1, LRFN2	1253	76	11126	2.10304	1	0.360428	7.22447
UP_KEYWORDS	NAD	24	0.0119324	0.0430113	LDHB, CYB5R1, ENOX2, ALDH5A1, SIRT7, PARP10, SIRT3, GPD1L, CRYL1, ISYNA1, PARP12, NXN, PARP9, PARP14, ALDH4A1, PARP3, UROC1, NQO1, STEAP2, STEAP1, HPGD, BDH1, RETSAT, AASDH	1424	143	12826	1.51167	1	0.257055	45.7412
GOTERM_BP_DIRECT	GO:0006418~tRNA aminoacylation for protein translation	11	0.00546902	0.00411329	IARS, TARS, WARS, YARS, CARS, NARS, SARS, LARS, EPRS, EARS2, MARS	1253	35	11126	2.7907	1	0.360828	7.41734
GOTERM_BP_DIRECT	GO:0071320~cellular response to cAMP	11	0.00546902	0.00411329	SLC26A6, SLC5A5, STAR, AQP9, EEF2K, STC1, ITPR3, KCNQ1, AHR, IGFBP5, PCK1	1253	35	11126	2.7907	1	0.360828	7.41734
GOTERM_CC_DIRECT	GO:0042995~cell projection	77	0.0382831	0.0299276	GPRIN1, ZFP385A, SRCIN1, TLR2, L1CAM, CNP, FGF13, TTLL7, CCDC39, CAMKK2, NRCAM, CCDC103, ATP2B4, TIAM2, UNC5A, ANK3, TTC30B, DYNC2H1, TRPV4, CIB2, ARC, STMN3, ARHGEF5, DNAIC2, PKD2L1, SMO, GTF2I, TMEM138, DEF6, OPHN1, USH1C, IFT81, SGCE, NRGN, ADAM15, COBL, TSHZ3, NDN, CCDC13, VIM, KIF19A, MDK, ESPN, EPHB2, ALCAM, RGS12, PLEKHG6, AVIL, SCNN1A, KIF21B, TUBB4A, SYNPO, CPT1C, MICALL2, IRGM1, FLRT1, …	1326	552	11880	1.24975	1	0.48112	36.0451
GOTERM_CC_DIRECT	GO:0016323~basolateral plasma membrane	23	0.0114352	0.0300413	CLDN7, CADM1, ENPP1, AQP9, LEPR, HSPA1A, ADORA1, SLC7A7, SLC26A6, NOD1, ATP2B4, PROM2, RASGRF1, ANK3, SLC26A7, ABCC3, AKAP5, SLC41A1, SLC22A5, KCNQ1, SLC40A1, HPGD, CAR2	1326	130	11880	1.5851	1	0.470112	36.1552
GOTERM_BP_DIRECT	GO:0002481~antigen processing and presentation of exogenous protein antigen via MHC class Ib, TAP-dependent	5	0.00248592	0.00421948	ABCB9, ABCB1A, ABCB1B, TAP2, TAP1	1253	7	11126	6.34249	1	0.360892	7.60174
GOTERM_BP_DIRECT	GO:0035879~plasma membrane lactate transport	5	0.00248592	0.00421948	SLC16A13, SLC16A3, SLC16A5, SLC16A4, SLC16A12	1253	7	11126	6.34249	1	0.360892	7.60174
SMART	SM00179:EGF_CA	16	0.00795494	0.0489599	SCUBE3, CRTAC1, SUSD1, DLL3, CELSR2, DLK1, SLIT3, FBLN1, NOTCH1, SNED1, STAB1, COMP, FBLN7, FBN2, MEGF6, EGF	803	78	6550	1.67321	1	0.563202	49.8566
SMART	SM00202:SR	5	0.00248592	0.0493154	LGALS3BP, HPN, SCARA5, PRSS12, TMPRSS4	803	12	6550	3.39871	1	0.549849	50.1138
UP_SEQ_FEATURE	repeat:LRR 8	16	0.00795494	0.00613775	VASN, PODN, RTN4RL1, LRRC8B, RXFP2, LRRC8D, TLR2, RTN4R, LRIG1, TLR3, LRRC15, PRELP, SLIT3, LINGO1, NOD1, LRRC9	1272	68	11563	2.13892	1	0.494637	10.4911
KEGG_PATHWAY	mmu04022:cGMP-PKG signaling pathway	21	0.0104409	0.0644806	ADCY1, GNAI1, NPR2, ATP1A2, ITPR3, ADORA1, MYL9, PPIF, EDNRA, EDNRB, ATP2B4, RGS2, GTF2I, CALML3, CREB3L1, CREB3L4, ADRA2C, CREB3L3, INS2, NFATC2, NFATC1	586	111	4605	1.48672	1	0.482835	58.5155
UP_KEYWORDS	Integrin	9	0.00447465	0.046616	ADAMTS14, ADAMTS20, ITGB4, ITGA11, ITGA2, ITGA4, ADAM8, CIB2, ITGA2B	1424	37	12826	2.1909	1	0.271794	48.5155
KEGG_PATHWAY	mmu04913:Ovarian steroidogenesis	8	0.00397747	0.0660135	PLA2G4A, ADCY1, CYP17A1, STAR, CYP11A1, PTGS2, INS2, BMP6	586	29	4605	2.16782	1	0.479163	59.4038
GOTERM_BP_DIRECT	GO:0001569~patterning of blood vessels	10	0.00497183	0.00447274	EDNRA, FLT1, NRP1, NRARP, SFRP2, FOXC2, TBX1, PLXND1, ENG, AHR	1253	30	11126	2.95983	1	0.370631	8.04016
UP_KEYWORDS	Biomineralization	5	0.00248592	0.0475476	WDR72, ENPP1, KLK4, FAM20C, ECM1	1424	13	12826	3.46424	1	0.272595	49.2107
GOTERM_BP_DIRECT	GO:0001755~neural crest cell migration	12	0.0059662	0.00454919	NRP2, EDN3, EDNRB, SOX10, SMO, SEMA6B, SEMA6C, SEMA4F, SEMA7A, PAX6, TBX1, PAX3	1253	41	11126	2.59887	1	0.368563	8.17211
KEGG_PATHWAY	mmu04640:Hematopoietic cell lineage	10	0.00497183	0.0677646	IL1R2, CD37, FLT3, ITGA2, ITGA4, CD24A, IL3RA, IL1A, IL6RA, ITGA2B	586	41	4605	1.91667	1	0.476858	60.3972
KEGG_PATHWAY	mmu04974:Protein digestion and absorption	10	0.00497183	0.0677646	COL7A1, COL22A1, SLC3A2, ATP1A2, COL5A3, KCNQ1, SLC1A1, COL11A1, COL5A1, SLC7A7	586	41	4605	1.91667	1	0.476858	60.3972
KEGG_PATHWAY	mmu05144:Malaria	6	0.0029831	0.0680859	ICAM1, COMP, MET, TGFB3, TLR2, SDC2	586	18	4605	2.61945	1	0.467452	60.577
UP_KEYWORDS	MHC I	4	0.00198873	0.0497541	H2-K1, H2-Q2, H2-D1, H2-Q7	1424	8	12826	4.50351	1	0.279608	50.8228
GOTERM_CC_DIRECT	GO:0030315~T-tubule	10	0.00497183	0.0338701	EDNRA, ATP2B4, ANK2, ANK3, TGFB3, RYR1, ATP1A2, BIN1, KCNJ11, SCN5A	1326	41	11880	2.18519	1	0.499779	39.7641
INTERPRO	IPR008160:Collagen triple helix repeat	10	0.00497183	0.0107202	COLQ, COL7A1, EMID1, COL22A1, COL16A1, COL5A3, SCARA5, COL11A1, COL20A1, COL5A1	1356	34	12069	2.61778	1	0.414789	16.8126
GOTERM_CC_DIRECT	GO:0020005~symbiont-containing vacuole membrane	3	0.00149155	0.0345239	GBP7, GBP3, GBP2	1326	3	11880	8.95928	1	0.494784	40.361
KEGG_PATHWAY	mmu05160:Hepatitis C	19	0.00944649	0.0713763	CLDN7, OAS3, TLR3, MAPK11, STAT1, CLDN23, STAT2, DDX58, CDKN1A, IFIT1, MAPK13, IRF7, OAS1B, PIK3R5, OAS1A, EIF2AK2, EGF, OAS1G, PPP2R2C	586	99	4605	1.50817	1	0.47324	62.3754
GOTERM_BP_DIRECT	GO:0001503~ossification	16	0.00795494	0.00489339	GPLD1, NPR2, MMP14, ECM1, SMO, TNFRSF11A, CTGF, NPPC, FOXC2, STC1, BMP7, ATP6V0A4, COL11A1, RUNX3, BMP6, BMP8A	1253	65	11126	2.18572	1	0.383147	8.76398
UP_SEQ_FEATURE	domain:MAM	5	0.00248592	0.00706547	NRP2, PTPRM, NRP1, MDGA1, PTPRT	1272	8	11563	5.68151	1	0.531364	11.9834
KEGG_PATHWAY	mmu04380:Osteoclast differentiation	18	0.0089493	0.0750687	FOSL2, SOCS1, MITF, MAPK11, STAT1, SIRPA, STAT2, FCGR3, TNFRSF11A, MAPK13, PIK3R5, MAP3K14, NFATC2, FOSL1, IL1A, SYK, NFATC1, BLNK	586	93	4605	1.52097	1	0.480572	64.3029
GOTERM_CC_DIRECT	GO:0032590~dendrite membrane	5	0.00248592	0.0366102	GABARAPL1, KCNC3, KCNB1, AKAP5, SGCE	1326	12	11880	3.73303	1	0.504123	42.229
KEGG_PATHWAY	mmu04721:Synaptic vesicle cycle	11	0.00546902	0.0755006	TCIRG1, ATP6V1C2, RAB3A, ATP6V0E2, ATP6V1E1, SLC18A2, ATP6V0A4, STX1B, DNM1, CACNA1B, ATP6V1F	586	48	4605	1.80087	1	0.472479	64.5224
GOTERM_BP_DIRECT	GO:0050957~equilibrioception	4	0.00198873	0.00520864	MYO7A, USH1G, USH1C, CDH23	1253	4	11126	8.87949	1	0.395069	9.30291
KEGG_PATHWAY	mmu05140:Leishmaniasis	10	0.00497183	0.0770081	PTGS2, C3, MAPK13, TGFB3, TLR2, MAPK11, ITGA4, STAT1, IL1A, FCGR3	586	42	4605	1.87104	1	0.469646	65.2785
UP_SEQ_FEATURE	repeat:LRR 9	15	0.00745775	0.0074453	VASN, PODN, LRRC8B, RXFP2, LRRC8D, TLR2, RTN4R, LRIG1, TLR3, LRRC15, PRELP, SLIT3, LINGO1, NOD1, LRRC9	1272	63	11563	2.16438	1	0.53758	12.5875
INTERPRO	IPR006117:2-5-oligoadenylate synthetase, conserved site	4	0.00198873	0.0118562	OAS1B, OAS3, OAS1A, OAS1G	1356	5	12069	7.12035	1	0.438811	18.4291
GOTERM_BP_DIRECT	GO:0007165~signal transduction	85	0.0422606	0.00533638	GNA15, ACVRL1, PLXNA1, LEPR, RGL3, TLR2, RRAD, TLR3, CXCR2, NRADD, ADORA1, VIPR2, RGL1, EDNRA, EDNRB, WNT4, DIRAS1, KISS1R, PTGIR, WNT3, DIRAS2, S1PR1, ARHGAP20, ANK2, TIAM2, UNC5A, ANK3, RASL10B, CXCR6, IL1RAP, TMEM102, PTPRM, MAGI2, PTGER4, RXFP2, UNC5CL, RASIP1, MRGPRE, PDE4D, PROKR1, NFAM1, ARRDC4, HMGA2, GRM4, SMO, GNAL, TNFRSF10B, LPAR5, LPAR6, CCR4, ACAP1, AKAP5, OPHN1, GPR50, PDGFRB, GLP1…	1253	569	11126	1.32646	1	0.395623	9.52043
UP_KEYWORDS	Serine protease	11	0.00546902	0.0571387	KLK6, HPN, KLK8, KLK4, C1RL, HTRA3, PRSS42, PRSS23, TMPRSS6, PRSS12, TMPRSS4	1424	52	12826	1.90533	1	0.310643	55.8791
UP_KEYWORDS	Stress response	13	0.00646338	0.057362	SGK1, HSPA1A, MAPK11, HSPA1B, SERPINH1, DDIT3, FMN2, PYCR1, MAPK13, MAP3K9, HIF3A, CHORDC1, PPP1R15A	1424	66	12826	1.77411	1	0.307582	56.0242
INTERPRO	IPR001314:Peptidase S1A, chymotrypsin-type	9	0.00447465	0.0122481	KLK6, HPN, KLK8, KLK4, C1RL, PRSS42, TMPRSS6, PRSS12, TMPRSS4	1356	29	12069	2.76221	1	0.441213	18.9798
GOTERM_BP_DIRECT	GO:0019221~cytokine-mediated signaling pathway	17	0.00845212	0.00551189	KLF6, FLRT1, PODN, RTN4RL1, FLT3, SOCS1, RTN4R, IL17RE, SOCS5, STAT1, LRRC15, IL6RA, STAT6, IRF5, IL1RAP, IL1A, IL3RA	1253	72	11126	2.09655	1	0.398818	9.81847
INTERPRO	IPR013032:EGF-like, conserved site	22	0.010938	0.0123705	VASN, SCUBE3, SUSD1, ITGB4, DLL3, TMEM8, CELSR2, DLK1, SLIT3, LAMA1, FBLN1, NOTCH1, SNED1, STAB1, COMP, FBLN7, LAMC2, FBN2, ADAM8, MEGF6, EGF, ADAM15	1356	112	12069	1.7483	1	0.436453	19.1511
GOTERM_BP_DIRECT	GO:0007267~cell-cell signaling	12	0.0059662	0.00555007	GATA1, WNT4, WNT3, CTGF, BHLHA15, STAB1, FZD1, ADRA2C, TNFSF9, GJA4, WNT7A, GJC1	1253	42	11126	2.537	1	0.394372	9.88319
INTERPRO	IPR018933:Netrin module, non-TIMP type	5	0.00248592	0.0125227	SFRP5, SFRP1, C3, SFRP2, ADAMTSL5	1356	9	12069	4.94469	1	0.43265	19.3636
SMART	SM00615:EPH_lbd	4	0.00198873	0.0638351	EPHB6, EPHB4, EPHA1, EPHB2	803	8	6550	4.07846	1	0.631274	59.6291
GOTERM_BP_DIRECT	GO:0050729~positive regulation of inflammatory response	10	0.00497183	0.00568511	EDNRA, PLA2G4A, PTGER4, ETS1, TLR2, ITGA2, TRPV4, TLR3, ADAM8, IL17RA	1253	31	11126	2.86435	1	0.3953	10.1117
SMART	SM01411:SM01411	5	0.00248592	0.0645501	EPHB6, SCUBE3, EPHB4, EPHA1, EPHB2	803	13	6550	3.13727	1	0.620495	60.0511
KEGG_PATHWAY	mmu04918:Thyroid hormone synthesis	11	0.00546902	0.0846224	GSR, SLC5A5, ADCY1, PAX8, CREB3L1, CREB3L4, ATP1A2, CREB3L3, PDIA4, ITPR3, PRKCB	586	49	4605	1.76412	1	0.493551	68.875
INTERPRO	IPR000980:SH2 domain	19	0.00944649	0.0129048	ITK, FRK, VAV3, SOCS1, STAP2, SOCS5, STAT1, STAT2, TNS4, STAT6, SH2D5, SH2D6, CHN1, INPP5D, GRB7, SRMS, SYK, SH3BP2, BLNK	1356	92	12069	1.83813	1	0.434814	19.8948
GOTERM_MF_DIRECT	GO:0046983~protein dimerization activity	23	0.0114352	0.0201126	ANO1, MITF, MLXIPL, HES6, KIF9, AHR, MXD4, HES1, ATP6V1C2, NPAS2, AHRR, BHLHA15, POU2F3, HEYL, HIF3A, DAO, ATOH8, ID3, BHLHE41, SCX, PRKRIR, DNM1, SIM2	1218	123	10722	1.64608	1	0.532795	28.0844
GOTERM_MF_DIRECT	GO:0001968~fibronectin binding	7	0.00348028	0.0201451	FBLN1, CTGF, COMP, ITGA4, LRRC15, IGFBP3, IGFBP5	1218	20	10722	3.08103	1	0.522795	28.123
GOTERM_BP_DIRECT	GO:0002474~antigen processing and presentation of peptide antigen via MHC class I	7	0.00348028	0.00592445	H2-K1, H2-Q2, H2-Q4, H2-D1, H2-T22, H2-T24, H2-Q7	1253	16	11126	3.88478	1	0.401641	10.5154
GOTERM_BP_DIRECT	GO:0050715~positive regulation of cytokine secretion	7	0.00348028	0.00592445	CADM1, PTGER4, TLR2, INS2, PSG22, IL1A, SYK	1253	16	11126	3.88478	1	0.401641	10.5154
UP_KEYWORDS	Chloride channel	6	0.0029831	0.0627642	SLC26A6, CLCN2, GABRA4, TTYH2, CLIC6, ANO1	1424	20	12826	2.70211	1	0.327683	59.4024
UP_KEYWORDS	Tyrosine-protein kinase	16	0.00795494	0.0645546	ITK, FRK, FLT1, FLT3, FLT4, MET, EPHA1, EPHB4, EPHB2, KDR, PDGFRB, TNK1, MERTK, EIF2AK2, SRMS, SYK	1424	89	12826	1.61924	1	0.331319	60.4677
GOTERM_CC_DIRECT	GO:0031526~brush border membrane	10	0.00497183	0.0446282	SLC26A6, TRPM6, ABCB1A, AQP7, SLC22A5, ATP6V0A4, SHANK2, PDZK1, SLC46A1, PRKCB	1326	43	11880	2.08355	1	0.564723	48.9126
GOTERM_BP_DIRECT	GO:0050768~negative regulation of neurogenesis	8	0.00397747	0.00628911	HES1, ATF5, ARHGEF2, NOTCH1, DLL3, BMP7, CD24A, WNT7A	1253	21	11126	3.38266	1	0.413961	11.1272
UP_KEYWORDS	Monooxygenase	8	0.00397747	0.0663262	CYP2U1, FMO5, CYP17A1, CYP11A1, CYP46A1, CYP4F16, CYP4F13, CYP26A1	1424	33	12826	2.18352	1	0.334762	61.4963
UP_KEYWORDS	Leucine-rich repeat	24	0.0119324	0.0674207	VASN, LRRC3, FLRT1, PODN, RTN4RL1, LRRC8B, RXFP2, LRRC8D, TLR2, RTN4R, TLR3, LRIG1, NLRX1, LRRC15, SLIT3, PRELP, ELFN1, ELFN2, LINGO1, NOD1, LGI2, LRRC9, LRRC61, LRFN2	1424	150	12826	1.44112	1	0.335279	62.1192
KEGG_PATHWAY	mmu05150:Staphylococcus aureus infection	4	0.00198873	0.0953291	C3AR1, ICAM1, C3, FCGR3	586	9	4605	3.49261	1	0.527646	73.3523
UP_KEYWORDS	Prostaglandin metabolism	4	0.00198873	0.0686253	PTGIS, PTGS2, PTGES, HPGD	1424	9	12826	4.00312	1	0.336239	62.794
GOTERM_MF_DIRECT	GO:0001730~2'-5'-oligoadenylate synthetase activity	4	0.00198873	0.0223982	OAS1B, OAS3, OAS1A, OAS1G	1218	6	10722	5.86864	1	0.550658	30.7584
GOTERM_MF_DIRECT	GO:0004950~chemokine receptor activity	4	0.00198873	0.0223982	GPR35, CCR4, CXCR6, CXCR2	1218	6	10722	5.86864	1	0.550658	30.7584
INTERPRO	IPR002401:Cytochrome P450, E-class, group I	6	0.0029831	0.0148652	CYP2U1, CYP17A1, CYP11A1, CYP46A1, CYP4F16, CYP4F13	1356	14	12069	3.81448	1	0.474276	22.5689
INTERPRO	IPR017871:ABC transporter, conserved site	9	0.00447465	0.0150988	ABCB9, ABCB1A, ABCB1B, TAP2, TAP1, ABCC3, ABCA1, ABCA4, ABCA3	1356	30	12069	2.67013	1	0.471995	22.882
UP_SEQ_FEATURE	domain:Fibronectin type-III 5	8	0.00397747	0.00957603	IL12RB1, COL7A1, MYOM3, FNDC3C1, SDK2, PRTG, L1CAM, COL20A1	1272	23	11563	3.16188	1	0.617096	15.9046
SMART	SM01391:SM01391	7	0.00348028	0.0763279	PRPH, DES, KRT80, KRT7, KRT79, VIM, IFFO1	803	25	6550	2.28394	1	0.669953	66.4388
GOTERM_CC_DIRECT	GO:0032809~neuronal cell body membrane	5	0.00248592	0.0483375	FLRT1, KCNC3, UNC5A, KCNB1, IL6RA	1326	13	11880	3.44588	1	0.58326	51.7542
GOTERM_MF_DIRECT	GO:0003705~transcription factor activity, RNA polymerase II distal enhancer sequence-specific binding	11	0.00546902	0.0231263	SOX10, FOXA2, ONECUT1, MITF, SIX3, FOXC2, POU3F1, PAX3, BHLHE41, AHR, NFATC1	1218	44	10722	2.20074	1	0.552164	31.5905
UP_SEQ_FEATURE	repeat:LRR 11	12	0.0059662	0.00962014	VASN, LINGO1, PODN, LRRC8B, LRRC8D, TLR2, LRIG1, TLR3, LRRC9, LRRC15, SLIT3, PRELP	1272	46	11563	2.37141	1	0.606748	15.972
GOTERM_BP_DIRECT	GO:0006006~glucose metabolic process	13	0.00646338	0.00688187	ONECUT1, ALDH5A1, PDK3, PDK4, G6PDX, HK2, KCNJ11, CPT1A, PCK1, INS2, FABP5, DCXR, IGFBP5	1253	49	11126	2.35578	1	0.436417	12.1132
GOTERM_MF_DIRECT	GO:0016705~oxidoreductase activity, acting on paired donors, with incorporation or reduction of molecular oxygen	9	0.00447465	0.0235324	CYP2U1, CYP17A1, PTGIS, CYP11A1, CYP46A1, CYP4F16, CYP4F13, EGLN3, CYP26A1	1218	32	10722	2.47583	1	0.548648	32.0505
INTERPRO	IPR000483:Cysteine-rich flanking region, C-terminal	10	0.00497183	0.0156874	VASN, ELFN1, FLRT1, TLR2, LRIG1, TLR3, LGI2, LRRC15, LRFN2, SLIT3	1356	36	12069	2.47235	1	0.477595	23.6652
GOTERM_MF_DIRECT	GO:0005178~integrin binding	15	0.00745775	0.0239776	ICAM1, ICAM5, ITGA2, L1CAM, COL16A1, MMP14, KDR, CTGF, SEMA7A, TGFBI, CIB2, ADAM8, JAM3, ADAM15, SYK	1218	70	10722	1.88635	1	0.545885	32.5514
UP_SEQ_FEATURE	nucleotide phosphate-binding region:ATP 1	7	0.00348028	0.010086	ABCB1A, ABCB1B, ABCC3, HK2, ABCA1, ABCA4, ABCA3	1272	18	11563	3.53516	1	0.612543	16.6808
UP_SEQ_FEATURE	nucleotide phosphate-binding region:ATP 2	7	0.00348028	0.010086	ABCB1A, ABCB1B, ABCC3, HK2, ABCA1, ABCA4, ABCA3	1272	18	11563	3.53516	1	0.612543	16.6808
GOTERM_CC_DIRECT	GO:0098793~presynapse	10	0.00497183	0.0507764	SLC6A9, AP1S2, SYT8, BSN, CLN8, STX1B, SYTL1, WNT7A, SYT17, CACNA1B	1326	44	11880	2.0362	1	0.590799	53.5415
SMART	SM00228:PDZ	22	0.010938	0.0803505	PARD6A, CNKSR1, MAGI2, MPP2, RHPN1, PDLIM4, PTPN13, PDZRN3, SYNPO2, SHANK2, BC034090, MAST3, CARD14, RGS12, TIAM2, GRIP2, APBA2, USH1C, DEPTOR, HTRA3, PDZK1, GRASP	803	125	6550	1.43562	1	0.675718	68.3937
GOTERM_BP_DIRECT	GO:0001945~lymph vessel development	6	0.0029831	0.00718671	FLT4, EFNB2, FOXC2, TBX1, SYK, KDR	1253	12	11126	4.43974	1	0.444238	12.6163
UP_KEYWORDS	Neurotransmitter transport	6	0.0029831	0.0751577	SLC6A9, SLC6A12, SLC18A2, SLC6A17, STX1B, RIMS4	1424	21	12826	2.57343	1	0.358458	66.2634
UP_KEYWORDS	Collagen	9	0.00447465	0.0780691	COLQ, COL7A1, EMID1, C1QL2, COL16A1, COL5A3, COL11A1, COL20A1, COL5A1	1424	41	12826	1.97715	1	0.365677	67.7107
UP_KEYWORDS	Disease mutation	11	0.00546902	0.0783433	ZBTB7B, ENPP1, MYO7A, MITF, PAX6, SLC22A5, PAX3, COL11A1, LPIN1, CACNA2D2, CDH23	1424	55	12826	1.8014	1	0.362644	67.844
GOTERM_MF_DIRECT	GO:0017080~sodium channel regulator activity	7	0.00348028	0.0255654	GPD1L, SGK1, ATP2B4, SGK2, GPLD1, SCN4B, FGF13	1218	21	10722	2.93432	1	0.559905	34.31
GOTERM_BP_DIRECT	GO:0042491~auditory receptor cell differentiation	5	0.00248592	0.00769077	HES1, MYO7A, USH1C, CUX1, CDH23	1253	8	11126	5.54968	1	0.460391	13.4421
SMART	SM00181:EGF	19	0.00944649	0.0859282	VASN, SCUBE3, SUSD1, DLL3, CELSR2, DLK1, MUC4, SLIT3, LAMA1, FBLN1, NOTCH1, SNED1, STAB1, COMP, FBLN7, LAMC2, FBN2, MEGF6, EGF	803	105	6550	1.47601	1	0.688012	70.9301
INTERPRO	IPR001590:Peptidase M12B, ADAM/reprolysin	8	0.00397747	0.0172387	ADAMTS14, ADAMTS20, ADAMTS15, ADAMTS10, ADAMTS1, ADAM8, ADAMTS2, ADAM15	1356	25	12069	2.84814	1	0.502863	25.694
INTERPRO	IPR002870:Peptidase M12B, propeptide	8	0.00397747	0.0172387	ADAMTS14, ADAMTS20, ADAMTS15, ADAMTS10, ADAMTS1, ADAM8, ADAMTS2, ADAM15	1356	25	12069	2.84814	1	0.502863	25.694
GOTERM_CC_DIRECT	GO:0031090~organelle membrane	9	0.00447465	0.0549151	CYP2U1, MGST3, FMO5, CYP46A1, PTGS2, FBXO2, SLC39A8, CYP26A1, EPHX1	1326	38	11880	2.12193	1	0.609686	56.434
GOTERM_BP_DIRECT	GO:0001656~metanephros development	9	0.00447465	0.00785791	TSHZ3, SPRY1, WNT4, PAX8, IRX1, FOXC2, ID3, CTSH, WT1	1253	27	11126	2.95983	1	0.461355	13.7143
SMART	SM00255:TIR	4	0.00198873	0.0872903	SARM1, IL1RAP, TLR2, TLR3	803	9	6550	3.62529	1	0.681232	71.5201
UP_KEYWORDS	Oxidoreductase	57	0.0283395	0.0827162	LDHB, CYB5R1, ALDH1L1, ENOX2, PTGS2, DOXL2, UTY, G6PDX, ALDH1L2, PRDX1, HPDL, GSR, MSRA, CRYL1, SPR, DAO, NQO1, 4930438A08RIK, AASDH, AIFM3, CYP11A1, ALDH5A1, CYP26A1, CBR3, PYCR1, STEAP2, STEAP1, SRXN1, KDM6B, AOC3, ALOX12, CYP2U1, ME1, ALDH18A1, EGLN3, IFI30, SESN2, SESN3, GPD1L, FMO5, PIR, ALDH4A1, GSTO2, BDH1, PTGR1, CYP46A1, CYP4F13, FDXR, FADS2, FADS6, CYP17A1, NXN, CYP4F16, DUS4L, HPGD, DC…	1424	420	12826	1.22238	1	0.375038	69.902
SMART	SM00630:Sema	7	0.00348028	0.0894352	SEMA6B, SEMA6C, PLXNA1, SEMA4F, SEMA7A, MET, PLXND1	803	26	6550	2.19609	1	0.678144	72.4268
UP_KEYWORDS	Deafness	4	0.00198873	0.0902	MYO7A, USH1G, MITF, CDH23	1424	10	12826	3.60281	1	0.398071	73.1429
GOTERM_BP_DIRECT	GO:0051092~positive regulation of NF-kappaB transcription factor activity	19	0.00944649	0.00833946	ICAM1, ARHGEF2, CLU, TLR2, TRIM14, TLR3, TRIM62, AIM2, PRKCB, MID2, PRKD1, CARD14, TNFRSF11A, NOD1, IL1RAP, RIPK3, INS2, EIF2AK2, ADAM8	1253	88	11126	1.91716	1	0.475249	14.494
INTERPRO	IPR003439:ABC transporter-like	9	0.00447465	0.0184012	ABCB9, ABCB1A, ABCB1B, TAP2, TAP1, ABCC3, ABCA1, ABCA4, ABCA3	1356	31	12069	2.584	1	0.518529	27.181
INTERPRO	IPR002293:Amino acid/polyamine transporter I	5	0.00248592	0.0190408	SLC7A3, SLC7A2, SLC7A1, SLC7A5, SLC7A7	1356	10	12069	4.45022	1	0.52342	27.9871
GOTERM_MF_DIRECT	GO:0017154~semaphorin receptor activity	5	0.00248592	0.0283131	NRP2, NRP1, PLXNA1, MET, PLXND1	1218	11	10722	4.00134	1	0.553723	37.2518
GOTERM_MF_DIRECT	GO:0000981~RNA polymerase II transcription factor activity, sequence-specific DNA binding	23	0.0114352	0.0281083	MAF, SOX10, FOXJ2, FOXA3, ELF5, SIX3, PAX6, GTF2IRD2, ZFP641, HES1, GATA1, ATF5, GTF2I, ETS1, OVOL1, HIF3A, BHLHE41, NFIC, NFATC2, PRKRIR, RUNX3, SIM2, NFIB	1218	127	10722	1.59424	1	0.559358	37.037
GOTERM_MF_DIRECT	GO:0015297~antiporter activity	9	0.00447465	0.0280697	SLC26A6, SLC7A3, SLC24A3, SLC7A2, SLC25A10, SLC7A1, SLC37A2, SLC7A5, SLC7A7	1218	33	10722	2.40081	1	0.567368	36.9964
GOTERM_MF_DIRECT	GO:0004860~protein kinase inhibitor activity	10	0.00497183	0.0277046	CDKN1A, TESC, FLRT1, PODN, RTN4RL1, SOCS1, RTN4R, TRIB3, SOCS5, LRRC15	1218	39	10722	2.25717	1	0.571292	36.6112
GOTERM_MF_DIRECT	GO:0004714~transmembrane receptor protein tyrosine kinase activity	10	0.00497183	0.0277046	FLT1, FLT3, FLT4, MET, PDGFRB, MERTK, EPHB4, EPHA1, EPHB2, KDR	1218	39	10722	2.25717	1	0.571292	36.6112
GOTERM_MF_DIRECT	GO:0005254~chloride channel activity	8	0.00397747	0.0275497	SLC1A4, SLC26A6, CLCN2, GABRA4, SLC26A7, TTYH2, CLIC6, ANO1	1218	27	10722	2.60828	1	0.578203	36.4471
GOTERM_CC_DIRECT	GO:0001917~photoreceptor inner segment	8	0.00397747	0.0588813	MYO7A, USH1G, ENO2, USH1C, CIB2, SHANK2, DNM1, CDH23	1326	32	11880	2.23982	1	0.62573	59.0477
UP_SEQ_FEATURE	short sequence motif:Selectivity filter	8	0.00397747	0.0122636	KCNS3, KCNC3, KCNB1, KCNF1, KCNQ2, KCNJ11, KCNQ1, KCNG1	1272	24	11563	3.03014	1	0.673442	19.9193
UP_KEYWORDS	Phosphopantetheine	3	0.00149155	0.0979498	ALDH1L1, ALDH1L2, AASDH	1424	5	12826	5.40421	1	0.42078	76.1553
GOTERM_BP_DIRECT	GO:0030968~endoplasmic reticulum unfolded protein response	12	0.0059662	0.0096178	ATF6, HERPUD1, STC2, BHLHA15, AARS, CREB3L1, CREB3L4, CREB3L3, EIF2AK2, PPP1R15A, DERL3, DDIT3	1253	45	11126	2.36786	1	0.512295	16.5316
GOTERM_BP_DIRECT	GO:0007160~cell-matrix adhesion	13	0.00646338	0.00959545	SNED1, CTGF, ITGB4, CNTN2, ITGA11, ITGA2, ITGA4, ADAM8, COL5A3, SIRPA, JAM3, ITGA2B, MUC4	1253	51	11126	2.2634	1	0.517686	16.4964
INTERPRO	IPR001412:Aminoacyl-tRNA synthetase, class I, conserved site	6	0.0029831	0.0202768	IARS, WARS, LARS, EPRS, EARS2, MARS	1356	15	12069	3.56018	1	0.538802	29.5211
GOTERM_BP_DIRECT	GO:0086004~regulation of cardiac muscle cell contraction	6	0.0029831	0.0106105	ANK2, PDE4B, STC1, PDE4D, ATP1A2, SCN5A	1253	13	11126	4.09823	1	0.541084	18.0822
GOTERM_BP_DIRECT	GO:0031290~retinal ganglion cell axon guidance	6	0.0029831	0.0106105	ALCAM, NRCAM, PTPRM, NRP1, SEMA4F, EPHB2	1253	13	11126	4.09823	1	0.541084	18.0822
GOTERM_BP_DIRECT	GO:0006814~sodium ion transport	14	0.00696057	0.0109086	SLC38A4, SLC5A5, ATP4A, ATP1A2, SLC24A3, COMMD3, SCN4B, SLC13A3, SLC13A4, SLC22A5, SCNN1B, SCNN1A, HCN3, SCN5A	1253	58	11126	2.14332	1	0.544937	18.5425
GOTERM_BP_DIRECT	GO:0010719~negative regulation of epithelial to mesenchymal transition	7	0.00348028	0.0112815	VASN, HPN, SFRP1, FOXA2, SFRP2, FOXA1, TRIM62	1253	18	11126	3.45313	1	0.545104	19.1148
GOTERM_BP_DIRECT	GO:0010575~positive regulation of vascular endothelial growth factor production	7	0.00348028	0.0112815	C3AR1, SULF2, ADORA2B, PTGS2, C3, FLT4, IL1A	1253	18	11126	3.45313	1	0.545104	19.1148
GOTERM_BP_DIRECT	GO:0048168~regulation of neuronal synaptic plasticity	7	0.00348028	0.0112815	SYP, ARC, STAR, RASGRF1, CNTN2, VGF, EPHB2	1253	18	11126	3.45313	1	0.545104	19.1148
GOTERM_BP_DIRECT	GO:0007156~homophilic cell adhesion via plasma membrane adhesion molecules	13	0.00646338	0.0112312	PVR, PTPRM, CADM1, DSG3, CDHR1, SDK2, PTPRT, CELSR2, L1CAM, IGSF9B, CD200, CDH4, CDH23	1253	52	11126	2.21987	1	0.54942	19.0378
INTERPRO	IPR001129:Membrane-associated, eicosanoid/glutathione metabolism (MAPEG) protein	4	0.00198873	0.021744	MGST3, PTGES, LTC4S, MGST1	1356	6	12069	5.93363	1	0.557036	31.3023
INTERPRO	IPR018952:2'-5'-oligoadenylate synthetase 1, domain 2/C-terminal	4	0.00198873	0.021744	OAS1B, OAS3, OAS1A, OAS1G	1356	6	12069	5.93363	1	0.557036	31.3023
INTERPRO	IPR013568:SEFIR	4	0.00198873	0.021744	IL17RE, IL17RC, IL17RD, IL17RA	1356	6	12069	5.93363	1	0.557036	31.3023
INTERPRO	IPR023352:Membrane associated eicosanoid/glutathione metabolism-like domain	4	0.00198873	0.021744	MGST3, PTGES, LTC4S, MGST1	1356	6	12069	5.93363	1	0.557036	31.3023
INTERPRO	IPR026774:2'-5'-oligoadenylate synthase	4	0.00198873	0.021744	OAS1B, OAS3, OAS1A, OAS1G	1356	6	12069	5.93363	1	0.557036	31.3023
GOTERM_BP_DIRECT	GO:0002523~leukocyte migration involved in inflammatory response	4	0.00198873	0.0119316	ADAM8, CD24A, JAM3, AOC3	1253	5	11126	7.10359	1	0.559527	20.1034
GOTERM_BP_DIRECT	GO:0031638~zymogen activation	4	0.00198873	0.0119316	GGT1, MMP14, CTSH, PRSS12	1253	5	11126	7.10359	1	0.559527	20.1034
GOTERM_BP_DIRECT	GO:0050909~sensory perception of taste	4	0.00198873	0.0119316	TRPM5, P2RX3, SCNN1B, SCNN1A	1253	5	11126	7.10359	1	0.559527	20.1034
GOTERM_BP_DIRECT	GO:0048846~axon extension involved in axon guidance	5	0.00248592	0.0126214	ALCAM, NRP2, SMO, NRP1, SLIT3	1253	9	11126	4.93305	1	0.574222	21.1399
GOTERM_BP_DIRECT	GO:0033280~response to vitamin D	5	0.00248592	0.0126214	ALPL, PTGS2, STC2, STC1, BMP7	1253	9	11126	4.93305	1	0.574222	21.1399
GOTERM_BP_DIRECT	GO:0045603~positive regulation of endothelial cell differentiation	5	0.00248592	0.0126214	NOTCH1, ACVRL1, ATOH8, ALOX12, BMP6	1253	9	11126	4.93305	1	0.574222	21.1399
INTERPRO	IPR000742:Epidermal growth factor-like domain	23	0.0114352	0.0232784	VASN, SCUBE3, PTGS2, SUSD1, DLL3, TMEM8, CELSR2, DLK1, MUC4, SLIT3, LAMA1, FBLN1, NOTCH1, SNED1, STAB1, COMP, FBLN7, LAMC2, FBN2, ADAM8, MEGF6, EGF, ADAM15	1356	126	12069	1.62468	1	0.574984	33.1194
GOTERM_MF_DIRECT	GO:0015171~amino acid transmembrane transporter activity	7	0.00348028	0.0318745	SLC38A4, SLC7A3, SLC7A2, SLC7A1, SLC6A17, SLC7A5, SLC7A7	1218	22	10722	2.80094	1	0.589239	40.8813
GOTERM_BP_DIRECT	GO:0046426~negative regulation of JAK-STAT cascade	8	0.00397747	0.0138661	FLRT1, PODN, RTN4RL1, SOCS1, RTN4R, SOCS5, HMGA2, LRRC15	1253	24	11126	2.95983	1	0.591788	22.9781
GOTERM_BP_DIRECT	GO:0030199~collagen fibril organization	8	0.00397747	0.0138661	ADAMTS14, SFRP2, FOXC2, SCX, COL11A1, ADAMTS2, SERPINH1, COL5A1	1253	24	11126	2.95983	1	0.591788	22.9781
INTERPRO	IPR001611:Leucine-rich repeat	24	0.0119324	0.0248802	VASN, LRRC3, FLRT1, PODN, RTN4RL1, LRRC8B, RXFP2, LRRC8D, TLR2, RTN4R, TLR3, LRIG1, NLRX1, LRRC15, SLIT3, PRELP, ELFN1, ELFN2, LINGO1, NOD1, LGI2, LRRC9, LRRC61, LRFN2	1356	134	12069	1.59411	1	0.59261	34.9681
GOTERM_BP_DIRECT	GO:0006749~glutathione metabolic process	11	0.00546902	0.0134822	GSTM1, GSTM2, GSR, GGT6, ALDH5A1, GSTK1, G6PDX, GGT1, GSTO2, MGST1, GSTM7	1253	41	11126	2.3823	1	0.592702	22.4155
GOTERM_BP_DIRECT	GO:0043588~skin development	11	0.00546902	0.0134822	IRF6, OVOL1, AARS, RYR1, ITGB4, SFN, PTCH2, ADAMTS2, LTB, TCF7L1, COL5A1	1253	41	11126	2.3823	1	0.592702	22.4155
INTERPRO	IPR001881:EGF-like calcium-binding	16	0.00795494	0.0254098	SCUBE3, CRTAC1, SUSD1, DLL3, CELSR2, DLK1, SLIT3, FBLN1, NOTCH1, SNED1, STAB1, COMP, FBLN7, FBN2, MEGF6, EGF	1356	78	12069	1.82573	1	0.593576	35.5687
GOTERM_MF_DIRECT	GO:0001664~G-protein coupled receptor binding	9	0.00447465	0.0331773	GNA15, S1PR1, RSPO1, GNAI1, GPRASP2, ITGB4, AKAP5, HSPA1A, ADORA1	1218	34	10722	2.33019	1	0.596098	42.159
GOTERM_BP_DIRECT	GO:0001666~response to hypoxia	27	0.013424	0.01385	ACVRL1, FOSL2, PGF, EGLN3, TGFB3, TLR2, ACOT2, ADORA1, CD24A, EDNRA, PTGIS, MB, MUC1, FLT1, CRYAB, ITGA2, MMP14, PRKCB, KDR, DDIT4, ETS1, PRL4A1, P2RX3, PKLR, HIF3A, NPPC, RYR1	1253	148	11126	1.61991	1	0.596948	22.9547
GOTERM_BP_DIRECT	GO:0042832~defense response to protozoan	6	0.0029831	0.015001	GBP7, CD37, IRGM2, BCL3, GBP3, GBP2	1253	14	11126	3.8055	1	0.604533	24.6188
GOTERM_BP_DIRECT	GO:0007413~axonal fasciculation	6	0.0029831	0.015001	CDK5R1, NRP1, NDN, CRTAC1, CNTN2, EPHB2	1253	14	11126	3.8055	1	0.604533	24.6188
GOTERM_BP_DIRECT	GO:0006883~cellular sodium ion homeostasis	6	0.0029831	0.015001	SGK1, TESC, SGK2, ATP4A, NR3C2, ATP1A2	1253	14	11126	3.8055	1	0.604533	24.6188
GOTERM_BP_DIRECT	GO:0016477~cell migration	29	0.0144183	0.0146411	PVR, NRP1, APC2, PAX3, ASAP3, CD24A, MDK, SDC2, SDC3, FAM83D, S1PR1, CTGF, BC067074, NFATC2, FMNL3, ARC, FLT1, VAV3, EFNB2, ITGA4, MMP14, SIRPA, ELMO3, COL5A1, KDR, HES1, PDGFRB, JAM3, SRMS	1253	163	11126	1.57979	1	0.606349	24.1021
GOTERM_BP_DIRECT	GO:0035725~sodium ion transmembrane transport	7	0.00348028	0.0149502	SCN4B, SLC13A4, SCNN1B, SCNN1A, SCN5A, HCN3, PKD2L1	1253	19	11126	3.27139	1	0.608638	24.5461
GOTERM_BP_DIRECT	GO:0060395~SMAD protein signal transduction	12	0.0059662	0.0156654	MAGI2, HEXA, VIM, HIPK2, TGFB3, ATOH8, BMP7, GDF15, TRF, BTBD11, BMP8A, BMP6	1253	48	11126	2.21987	1	0.610076	25.5638
GOTERM_BP_DIRECT	GO:0007417~central nervous system development	15	0.00745775	0.015595	DMBX1, HAPLN3, NDN, GABRA4, ALDH5A1, CYP26A1, ZIC1, NRCAM, SMO, CHD7, B3GNT5, PAX8, CNTN2, VNN1, ID3	1253	67	11126	1.98795	1	0.613619	25.4642
INTERPRO	IPR000998:MAM domain	5	0.00248592	0.0273091	NRP2, PTPRM, NRP1, MDGA1, PTPRT	1356	11	12069	4.04566	1	0.613642	37.68
GOTERM_MF_DIRECT	GO:0046978~TAP1 binding	3	0.00149155	0.0357037	TAP2, TAP1, TAPBP	1218	3	10722	8.80296	1	0.615612	44.5633
GOTERM_MF_DIRECT	GO:0015440~peptide-transporting ATPase activity	3	0.00149155	0.0357037	ABCB9, TAP2, TAP1	1218	3	10722	8.80296	1	0.615612	44.5633
GOTERM_MF_DIRECT	GO:0001609~G-protein coupled adenosine receptor activity	3	0.00149155	0.0357037	ADORA2B, ADORA2A, ADORA1	1218	3	10722	8.80296	1	0.615612	44.5633
GOTERM_MF_DIRECT	GO:0046979~TAP2 binding	3	0.00149155	0.0357037	TAP2, TAP1, TAPBP	1218	3	10722	8.80296	1	0.615612	44.5633
GOTERM_MF_DIRECT	GO:0008107~galactoside 2-alpha-L-fucosyltransferase activity	3	0.00149155	0.0357037	SEC1, FUT1, FUT2	1218	3	10722	8.80296	1	0.615612	44.5633
GOTERM_CC_DIRECT	GO:0042825~TAP complex	3	0.00149155	0.0639718	TAP2, TAP1, TAPBP	1326	4	11880	6.71946	1	0.618463	62.1882
GOTERM_CC_DIRECT	GO:0045098~type III intermediate filament	3	0.00149155	0.0639718	PRPH, DES, VIM	1326	4	11880	6.71946	1	0.618463	62.1882
INTERPRO	IPR004827:Basic-leucine zipper domain	11	0.00546902	0.0289292	ATF6, MAF, ATF5, FOSL2, CEBPG, CREB3L1, CREB3L4, CREB3L3, NFE2L3, FOSL1, DDIT3	1356	46	12069	2.12837	1	0.622001	39.4291
INTERPRO	IPR017970:Homeobox, conserved site	17	0.00845212	0.0285509	DMBX1, GSC, CDX2, NKX2-9, IRX1, PAX6, HOXB13, VAX2, EN1, PAX3, NKX6-1, LHX2, POU2F3, PAX7, GBX1, POU3F1, CUX1	1356	86	12069	1.75939	1	0.623598	39.0249
GOTERM_CC_DIRECT	GO:0034707~chloride channel complex	6	0.0029831	0.0639365	SLC26A6, CLCN2, GABRA4, TTYH2, CLIC6, ANO1	1326	20	11880	2.68778	1	0.627565	62.1672
GOTERM_CC_DIRECT	GO:0031226~intrinsic component of plasma membrane	6	0.0029831	0.0639365	ALCAM, S1PR1, UNC5A, TLR2, PDGFRB, SCN4B	1326	20	11880	2.68778	1	0.627565	62.1672
GOTERM_CC_DIRECT	GO:0030054~cell junction	68	0.0338085	0.0629501	CLDN7, SRCIN1, FOXA2, CADM1, SYT5, WASF1, GRIK3, GJA4, SYP, ANK2, SH2D5, ANK3, TRPV4, GRID1, ARC, ARHGEF2, MAGI2, SDK2, ARHGEF5, BSN, TNS4, DACT1, EVPL, XIRP1, COLQ, CGN, OPHN1, 2610301B20RIK, NRGN, TGFB1I1, JAM2, JAM3, ADAM15, ITGB4, IFI30, NRN1, RIMS4, GJC1, ESPN, RGS12, PPL, SYNPO, LRFN2, TES, MICALL2, CPT1C, PARD6A, GABRE, DIXDC1, FLRT1, GABRA4, KCNB1, SLC6A17, IGSF9B, SHANK2, SAMD4, S100A14,…	1326	500	11880	1.21846	1	0.631209	61.5765
GOTERM_CC_DIRECT	GO:0005882~intermediate filament	9	0.00447465	0.0626229	SLC1A4, PRPH, DES, KRT80, ADORA2A, KRT7, KRT79, VIM, IFFO1	1326	39	11880	2.06753	1	0.639039	61.3786
GOTERM_MF_DIRECT	GO:0004497~monooxygenase activity	9	0.00447465	0.0388814	CYP2U1, FMO5, CYP17A1, PTGIS, CYP11A1, CYP46A1, CYP4F16, CYP4F13, CYP26A1	1218	35	10722	2.26362	1	0.63983	47.4544
GOTERM_CC_DIRECT	GO:0072562~blood microparticle	9	0.00447465	0.070972	STOM, LGALS3BP, KNG2, C3, CLU, HSPA1A, CIB2, TRF, ITGA2B	1326	40	11880	2.01584	1	0.640077	66.1415
GOTERM_CC_DIRECT	GO:0043194~axon initial segment	4	0.00198873	0.0695196	NRCAM, ANK3, BIN1, KCNQ2	1326	9	11880	3.9819	1	0.641051	65.3544
GOTERM_BP_DIRECT	GO:0048468~cell development	8	0.00397747	0.0174335	GATA1, MAF, SMO, FOXA2, IRF6, BMP7, GDF15, GJC1	1253	25	11126	2.84144	1	0.644586	28.0245
GOTERM_BP_DIRECT	GO:0007189~adenylate cyclase-activating G-protein coupled receptor signaling pathway	8	0.00397747	0.0174335	GNAL, ADCY1, PTGIR, ADORA2B, PTGER4, ADORA2A, RXFP2, GLP1R	1253	25	11126	2.84144	1	0.644586	28.0245
GOTERM_BP_DIRECT	GO:0071345~cellular response to cytokine stimulus	8	0.00397747	0.0174335	HAX1, FLT3, SOCS1, DPYSL3, ITGA4, STAT1, IL17RA, NKX6-1	1253	25	11126	2.84144	1	0.644586	28.0245
GOTERM_MF_DIRECT	GO:0042803~protein homodimerization activity	83	0.0412662	0.0412352	PVR, PTGS2, CADM1, PGF, MYO7A, USH1G, E2F8, G6PDX, ANO1, NR6A1, PSPH, CDSN, PRDX1, GSTM7, GSTM1, CCDC103, GSS, GSTM2, GSR, CRYL1, NOD1, BHLHA15, SPR, IZUMO1, CREB3L3, BHLHE41, CIB2, KCNQ1, CARS, STC2, CRYAB, OLFML2B, DMRT3, ZHX2, DMRT2, HES6, EXD1, HES1, STOM, RBPMS, MAD2L1, MAPK4, CLIC6, NPPC, JAM3, PRPS2, AOC3, GGCT, ENPP1, RAP1GAP, STK10, NR3C2, NRN1, NR2C1, GPD1L, MYOM3, TAP2, TAP1, NAGA, ENO…	1218	601	10722	1.21572	1	0.64688	49.5039
GOTERM_MF_DIRECT	GO:0004713~protein tyrosine kinase activity	18	0.0089493	0.0411156	ITK, FRK, FLT1, FLT3, FLT4, MET, EPHB4, EPHA1, EPHB2, KDR, EDNRA, PDGFRB, TNK1, EIF2AK2, EGF, MERTK, SRMS, SYK	1218	96	10722	1.65055	1	0.653213	49.4016
GOTERM_BP_DIRECT	GO:0032496~response to lipopolysaccharide	23	0.0114352	0.0184023	ALPL, PTGS2, PTGER4, MAPKAPK3, TLR2, CNP, STAT1, NRADD, PCK2, S100A14, PCK1, EDNRA, EDNRB, PTGIR, NOTCH1, TNFRSF11A, TNFRSF10B, PTGES, IL10RA, TRPV4, EIF2AK2, SPON2, MGST1	1253	123	11126	1.66039	1	0.659564	29.3398
GOTERM_BP_DIRECT	GO:0030593~neutrophil chemotaxis	7	0.00348028	0.0193706	EDN3, VAV3, PDE4B, PDE4D, CXCR2, FCGR3, SYK	1253	20	11126	3.10782	1	0.663781	30.6319
GOTERM_BP_DIRECT	GO:0042593~glucose homeostasis	18	0.0089493	0.0196522	KCNB1, LEPR, PDK4, FOXA1, MET, PAX6, MLXIPL, VGF, SESN2, PCK1, SESN3, BHLHA15, PPP1R3G, SLC18A2, TRPV4, CACNA1E, INS2, IGFBP5	1253	89	11126	1.79585	1	0.664331	31.0033
GOTERM_BP_DIRECT	GO:0001764~neuron migration	18	0.0089493	0.0196522	NRP2, CDK5R1, NRP1, NDN, MDGA1, MET, PAX6, CELSR2, FGF13, NKX6-1, CDKL5, DDIT4, BBS1, FEZF1, NAV1, CCR4, CNTN2, GFRA3	1253	89	11126	1.79585	1	0.664331	31.0033
GOTERM_BP_DIRECT	GO:0006805~xenobiotic metabolic process	5	0.00248592	0.0191871	AHRR, CYP46A1, CYP26A1, GSTO2, AHR	1253	10	11126	4.43974	1	0.665112	30.3887
GOTERM_BP_DIRECT	GO:0042742~defense response to bacterium	10	0.00497183	0.0189687	H2-K1, IRGM2, NOD1, ISG15, STAB1, BCL3, DEFB22, SPON2, S100A14, SYK	1253	37	11126	2.39986	1	0.665796	30.0984
INTERPRO	IPR001245:Serine-threonine/tyrosine-protein kinase catalytic domain	20	0.00994367	0.0337929	ITK, FRK, FLT1, ACVRL1, FLT3, FLT4, MET, NPR2, EPHB4, EPHA1, EPHB2, KDR, EPHB6, MAP3K9, PDGFRB, TNK1, MLKL, MERTK, SRMS, SYK	1356	109	12069	1.63311	1	0.673598	44.4069
INTERPRO	IPR018533:Forkhead box protein, C-terminal	3	0.00149155	0.0349649	FOXA2, FOXA3, FOXA1	1356	3	12069	8.90044	1	0.673889	45.5474
INTERPRO	IPR021805:Peptidase M10A, matrix metallopeptidase, C-terminal	3	0.00149155	0.0349649	MMP15, MMP14, MMP24	1356	3	12069	8.90044	1	0.673889	45.5474
INTERPRO	IPR001634:Adenosine receptor	3	0.00149155	0.0349649	ADORA2B, ADORA2A, ADORA1	1356	3	12069	8.90044	1	0.673889	45.5474
INTERPRO	IPR007743:Interferon-inducible GTPase	3	0.00149155	0.0349649	IRGM1, IRGM2, IGTP	1356	3	12069	8.90044	1	0.673889	45.5474
INTERPRO	IPR013638:Fork-head N-terminal	3	0.00149155	0.0349649	FOXA2, FOXA3, FOXA1	1356	3	12069	8.90044	1	0.673889	45.5474
INTERPRO	IPR021673:C-terminal domain of RIG-I	3	0.00149155	0.0349649	DDX58, IFIH1, DHX58	1356	3	12069	8.90044	1	0.673889	45.5474
INTERPRO	IPR006667:SLC41 divalent cation transporters, integral membrane domain	3	0.00149155	0.0349649	SLC41A2, SLC41A3, SLC41A1	1356	3	12069	8.90044	1	0.673889	45.5474
INTERPRO	IPR002516:Glycosyl transferase, family 11	3	0.00149155	0.0349649	SEC1, FUT1, FUT2	1356	3	12069	8.90044	1	0.673889	45.5474
GOTERM_MF_DIRECT	GO:0042813~Wnt-activated receptor activity	6	0.0029831	0.0453888	SFRP5, TSPAN12, SFRP1, SFRP2, FZD1, EGF	1218	18	10722	2.93432	1	0.675593	52.9388
GOTERM_MF_DIRECT	GO:0017046~peptide hormone binding	6	0.0029831	0.0453888	EDNRB, LEPR, RXFP2, NPR2, SLC40A1, GLP1R	1218	18	10722	2.93432	1	0.675593	52.9388
GOTERM_CC_DIRECT	GO:0014704~intercalated disc	9	0.00447465	0.0799664	DES, ANK2, XIRP1, ANK3, SCN4B, FGF13, ATP1A2, KCNJ11, SCN5A	1326	41	11880	1.96667	1	0.676968	70.6566
UP_SEQ_FEATURE	DNA-binding region:Homeobox	18	0.0089493	0.0128077	DMBX1, GSC, CDX2, ONECUT1, NKX2-9, SIX3, PAX6, HOXB13, VAX2, EN1, PAX3, NKX6-1, LHX2, POU2F3, PAX7, GBX1, POU3F1, CUX1	1272	87	11563	1.88077	1	0.678495	20.7097
INTERPRO	IPR003650:Orange	4	0.00198873	0.0349135	HES1, HEYL, HES6, BHLHE41	1356	7	12069	5.08597	1	0.679478	45.4978
GOTERM_BP_DIRECT	GO:0006813~potassium ion transport	14	0.00696057	0.0213851	KCNS3, KCNC3, KCNT1, ATP4A, SLC24A3, KCNB1, KCNF1, ATP1A2, KCNQ2, KCNQ1, KCNJ11, HCN3, KCNG1, KCNE4	1253	63	11126	1.97322	1	0.686151	33.2485
GOTERM_BP_DIRECT	GO:0045944~positive regulation of transcription from RNA polymerase II promoter	104	0.0517071	0.0211357	AKNA, HMGN3, LMO4, TLR2, TGFB3, TLR3, ZIC1, GATA1, S1PR1, BHLHA15, CREB3L1, CREB3L4, CREB3L3, IFRD1, IL1A, NKX2-9, MLXIPL, SIX3, EOMES, TOX2, DDIT3, HES1, SLC40A1, GLP1R, CRTC3, HAX1, ONECUT1, WT1, LHX2, RUNX3, KLF5, KLF6, IKZF4, ESRRB, MAML1, MET, FOXA1, TEAD1, EN1, DDX58, ATF6, ATF5, NOTCH1, ETS1, SFRP2, KLF2, BMP7, ENG, BMP6, ACVRL1, FOSL2, FOXA2, FOXA3, ELF5, MITF, NR6A1, E2F8, PAX6, PAX3, PA…	1253	756	11126	1.22152	1	0.68647	32.9297
GOTERM_BP_DIRECT	GO:0014807~regulation of somitogenesis	4	0.00198873	0.0218781	NOTCH1, CDX2, DMRT2, PAX3	1253	6	11126	5.91966	1	0.689952	33.8744
GOTERM_BP_DIRECT	GO:0044406~adhesion of symbiont to host	4	0.00198873	0.0218781	ICAM1, GBP7, GBP3, GBP2	1253	6	11126	5.91966	1	0.689952	33.8744
UP_SEQ_FEATURE	repeat:LRR 12	11	0.00546902	0.0136842	LINGO1, PODN, LRRC8B, LRRC8D, TLR2, LRIG1, TLR3, LRRC9, LRRC15, SLIT3, PRELP	1272	42	11563	2.38082	1	0.692191	21.9675
INTERPRO	IPR003968:Potassium channel, voltage dependent, Kv	5	0.00248592	0.0374043	KCNS3, KCNC3, KCNB1, KCNF1, KCNG1	1356	12	12069	3.70852	1	0.692883	47.851
INTERPRO	IPR017448:Speract/scavenger receptor-related	5	0.00248592	0.0374043	LGALS3BP, HPN, SCARA5, PRSS12, TMPRSS4	1356	12	12069	3.70852	1	0.692883	47.851
GOTERM_MF_DIRECT	GO:0005125~cytokine activity	14	0.00696057	0.0494551	GRN, TGFB3, PRL7D1, TNFSF9, BMP7, GDF15, SECTM1A, CCL28, WNT7A, LTB, IL1A, CMTM5, BMP8A, BMP6	1218	70	10722	1.76059	1	0.700479	56.0882
GOTERM_MF_DIRECT	GO:0035497~cAMP response element binding	5	0.00248592	0.0510705	ATF6, CREB3L1, CREB3L4, CREB3L3, HMGA2	1218	13	10722	3.38575	1	0.705505	57.2836
GOTERM_MF_DIRECT	GO:0008236~serine-type peptidase activity	12	0.0059662	0.0532124	HPN, KLK8, KLK4, ENDOU, C1RL, HTRA3, PRSS42, DPP6, PRSS23, TMPRSS6, PRSS12, TMPRSS4	1218	57	10722	1.85325	1	0.707362	58.8215
GOTERM_MF_DIRECT	GO:0004888~transmembrane signaling receptor activity	12	0.0059662	0.0532124	LY75, MRC1, SMO, TNFRSF11A, LEPR, FZD1, TLR2, TLR3, CELSR2, NFAM1, VIPR2, GLP1R	1218	57	10722	1.85325	1	0.707362	58.8215
GOTERM_MF_DIRECT	GO:0003725~double-stranded RNA binding	12	0.0059662	0.0532124	DDX58, IFIH1, VIM, OAS1B, OAS3, SLC3A2, TLR3, HSPA1A, OAS1A, EIF2AK2, OAS1G, DHX58	1218	57	10722	1.85325	1	0.707362	58.8215
GOTERM_MF_DIRECT	GO:0004222~metalloendopeptidase activity	14	0.00696057	0.0545201	ADAMTS14, ADAMTS20, ADAMTSL5, ADAMTS15, MMP15, MMP23, MMP14, MMP24, PAPPA, ADAMTS10, ADAMTS1, ADAM8, ADAMTS2, ADAM15	1218	71	10722	1.73579	1	0.709857	59.7347
GOTERM_MF_DIRECT	GO:0005003~ephrin receptor activity	4	0.00198873	0.0527275	EPHB6, EPHB4, EPHA1, EPHB2	1218	8	10722	4.40148	1	0.710574	58.4779
GOTERM_CC_DIRECT	GO:0048786~presynaptic active zone	6	0.0029831	0.0903474	SYP, ADORA2A, BSN, SHANK2, ADORA1, RIMS4	1326	22	11880	2.44344	1	0.714832	75.168
GOTERM_CC_DIRECT	GO:0070971~endoplasmic reticulum exit site	5	0.00248592	0.0942319	H2-K1, H2-Q2, H2-Q4, H2-D1, H2-Q7	1326	16	11880	2.79977	1	0.722584	76.6831
GOTERM_BP_DIRECT	GO:0010975~regulation of neuron projection development	7	0.00348028	0.0246032	NRCAM, KLK6, SFRP1, SFRP2, PAX6, AVIL, DPYSL3	1253	21	11126	2.95983	1	0.728133	37.2355
GOTERM_CC_DIRECT	GO:0044294~dendritic growth cone	3	0.00149155	0.0988616	COBL, SMO, CDKL5	1326	5	11880	5.37557	1	0.73268	78.3762
GOTERM_MF_DIRECT	GO:0003690~double-stranded DNA binding	19	0.00944649	0.0605307	MAF, KLF6, FOSL2, CDX2, RAD51AP1, FOXA2, CEBPG, NKX2-9, FOXA1, PAX6, NR3C2, AFF3, STAT1, AIM2, WT1, DDX58, STRA13, NFIC, NFIB	1218	108	10722	1.54867	1	0.741786	63.6931
INTERPRO	IPR011527:ABC transporter, transmembrane domain, type 1	6	0.0029831	0.0435978	ABCB9, ABCB1A, ABCB1B, TAP2, TAP1, ABCC3	1356	18	12069	2.96681	1	0.742865	53.2945
INTERPRO	IPR001478:PDZ domain	22	0.010938	0.0443139	PARD6A, CNKSR1, MAGI2, MPP2, RHPN1, PDLIM4, PTPN13, PDZRN3, SYNPO2, SHANK2, BC034090, MAST3, CARD14, RGS12, TIAM2, GRIP2, APBA2, USH1C, DEPTOR, HTRA3, PDZK1, GRASP	1356	127	12069	1.54181	1	0.743096	53.8881
GOTERM_BP_DIRECT	GO:0015991~ATP hydrolysis coupled proton transport	8	0.00397747	0.0264111	TCIRG1, ATP6V1C2, ATP6V0E2, ATP4A, ATP6V1E1, ATP1A2, ATP6V0A4, ATP6V1F	1253	27	11126	2.63096	1	0.744802	39.3754
GOTERM_BP_DIRECT	GO:0030216~keratinocyte differentiation	9	0.00447465	0.026809	TXNIP, NOTCH1, EVPL, PTGS2, IRF6, POU2F3, PAX6, POU3F1, SFN	1253	33	11126	2.42168	1	0.74591	39.837
GOTERM_BP_DIRECT	GO:0010595~positive regulation of endothelial cell migration	9	0.00447465	0.026809	PRKD1, ETS1, FLT4, GPLD1, FOXC2, ATOH8, WNT7A, ALOX12, KDR	1253	33	11126	2.42168	1	0.74591	39.837
GOTERM_BP_DIRECT	GO:0007612~learning	10	0.00497183	0.0263632	PAK6, GRM4, ARC, PTGS2, CHST10, CNTN2, FGF13, SHANK2, FOSL1, EPHB2	1253	39	11126	2.27679	1	0.748379	39.3196
INTERPRO	IPR017441:Protein kinase, ATP binding site	47	0.0233676	0.0464136	FRK, ACVRL1, STK10, MAPKAPK3, BRSK2, AURKB, EPHB4, CAMKK1, CAMKK2, EPHB2, PAK6, STK32C, MAP3K9, DCLK3, DYRK4, DCLK2, CDK15, CDK14, SYK, ITK, SGK1, FLT1, SGK2, FLT3, FLT4, MET, MAPK11, PIM2, CDKL2, EPHA1, CDKL5, PRKCB, KDR, PRKD1, MAPK13, MAPK4, ULK2, HIPK2, RIPK3, PDGFRB, TNK1, MERTK, MAP3K14, EIF2AK2, CDK20, NEK5, SRMS	1356	320	12069	1.30725	1	0.748713	55.5881
GOTERM_MF_DIRECT	GO:0008467~[heparan sulfate]-glucosamine 3-sulfotransferase 1 activity	3	0.00149155	0.0660666	HS3ST6, HS3ST1, HS3ST3B1	1218	4	10722	6.60222	1	0.749659	67.0131
GOTERM_BP_DIRECT	GO:0006790~sulfur compound metabolic process	5	0.00248592	0.0275135	SULT4A1, SULF2, PAX8, CHST8, CHST3	1253	11	11126	4.03613	1	0.750933	40.6462
GOTERM_BP_DIRECT	GO:0032897~negative regulation of viral transcription	5	0.00248592	0.0275135	IFITM3, TRIM14, TRIM62, TRIM21, MID2	1253	11	11126	4.03613	1	0.750933	40.6462
GOTERM_BP_DIRECT	GO:0050678~regulation of epithelial cell proliferation	5	0.00248592	0.0275135	EDNRA, HES1, EDNRB, NOTCH1, TACSTD2	1253	11	11126	4.03613	1	0.750933	40.6462
GOTERM_BP_DIRECT	GO:0002687~positive regulation of leukocyte migration	5	0.00248592	0.0275135	TLR2, ITGA2, ITGA4, AOC3, ITGA2B	1253	11	11126	4.03613	1	0.750933	40.6462
GOTERM_BP_DIRECT	GO:0022407~regulation of cell-cell adhesion	5	0.00248592	0.0275135	WNT4, NRARP, CELSR2, ADAM8, CD24A	1253	11	11126	4.03613	1	0.750933	40.6462
GOTERM_BP_DIRECT	GO:0032722~positive regulation of chemokine production	5	0.00248592	0.0275135	ADORA2B, TLR2, TLR3, EIF2AK2, IL6RA	1253	11	11126	4.03613	1	0.750933	40.6462
INTERPRO	IPR008266:Tyrosine-protein kinase, active site	15	0.00745775	0.046069	ITK, FRK, FLT1, FLT3, FLT4, MET, EPHA1, EPHB4, EPHB2, KDR, PDGFRB, TNK1, MERTK, SRMS, SYK	1356	77	12069	1.73385	1	0.75144	55.3132
GOTERM_MF_DIRECT	GO:0020037~heme binding	12	0.0059662	0.065672	CYP2U1, CYP17A1, PTGIS, CYP11A1, CYP46A1, PTGS2, STC2, CYP4F16, CYP4F13, CYP26A1, PRDX1, MB	1218	59	10722	1.79043	1	0.753233	66.7862
GOTERM_MF_DIRECT	GO:0019838~growth factor binding	8	0.00397747	0.0636182	FGFBP3, FLT1, NRP1, OSMR, FLT4, IGFBP3, IGFBP5, KDR	1218	32	10722	2.20074	1	0.753593	65.5815
GOTERM_BP_DIRECT	GO:0009887~organ morphogenesis	15	0.00745775	0.0281071	NRP1, CDX2, EFNB2, TGFB3, SYCP2, SLIT3, EPHB2, GATA1, WNT3, PAX9, PAX7, PAX8, GAMT, BMP7, WNT7A	1253	72	11126	1.84989	1	0.754371	41.3199
GOTERM_MF_DIRECT	GO:0003950~NAD+ ADP-ribosyltransferase activity	6	0.0029831	0.068007	PARP9, PARP12, PARP14, PARP3, PARP10, LRRC9	1218	20	10722	2.64089	1	0.754401	68.1077
GOTERM_MF_DIRECT	GO:0004872~receptor activity	15	0.00745775	0.0650704	PVR, MRC1, CADM1, RTN4RL1, GRIK3, TLR2, ITGB4, TLR3, EPHB2, NOTCH1, CD200, SLC40A1, GLP1R, GRID1, GFRA3	1218	80	10722	1.65055	1	0.755745	66.4375
GOTERM_BP_DIRECT	GO:0006816~calcium ion transport	16	0.00795494	0.0287044	TRPM6, ITPR3, GJA4, CACNA2D2, PKD2L1, PRKCB, ATP2C2, ATP2B4, SLC24A3, RYR1, TRPV4, CACNA1E, MYB, CACNA1B, NFATC1, CDH23	1253	79	11126	1.79838	1	0.757735	41.9906
INTERPRO	IPR011641:Tyrosine-protein kinase ephrin type A/B receptor-like	5	0.00248592	0.0493564	EPHB6, SCUBE3, EPHB4, EPHA1, EPHB2	1356	13	12069	3.42325	1	0.765123	57.8716
INTERPRO	IPR001134:Netrin domain	5	0.00248592	0.0493564	SFRP5, SFRP1, C3, SFRP2, ADAMTSL5	1356	13	12069	3.42325	1	0.765123	57.8716
UP_SEQ_FEATURE	domain:Disintegrin	7	0.00348028	0.0173973	ADAMTS20, ADAMTS15, ADAMTS10, ADAMTS1, ADAM8, ADAMTS2, ADAM15	1272	20	11563	3.18164	1	0.76756	27.09
UP_SEQ_FEATURE	domain:Peptidase M12B	7	0.00348028	0.0173973	ADAMTS20, ADAMTS15, ADAMTS10, ADAMTS1, ADAM8, ADAMTS2, ADAM15	1272	20	11563	3.18164	1	0.76756	27.09
UP_SEQ_FEATURE	domain:Peptidase S1	7	0.00348028	0.0173973	HPN, KLK8, C1RL, PRSS42, TMPRSS6, PRSS12, TMPRSS4	1272	20	11563	3.18164	1	0.76756	27.09
UP_SEQ_FEATURE	binding site:ATP	67	0.0333113	0.0179988	ACVRL1, AURKB, ACSF3, CAMKK1, CAMKK2, PAK6, GSS, MAP3K9, CDK15, CDK14, SYK, AASDH, CARS, TRPM6, SGK1, SGK2, PIM2, CDKL2, CDKL5, EARS2, PRKCB, MAST3, NME4, PRKD1, MAPK4, ACAP1, HIPK2, RIPK3, PDGFRB, MAP3K14, EIF2AK2, NEK5, PRPS2, FRK, STK10, BRSK2, MAPKAPK3, EPHB4, EPHB2, IARS, STK32C, VRK2, SBK1, CKMT1, LARS, DCLK3, DYRK4, DCLK2, EHD4, MARS, ITK, FLT1, FLT3, FLT4, PDK3, PDK4, MET, EPRS, MAPK11, E…	1272	466	11563	1.30699	1	0.769895	27.8893
GOTERM_MF_DIRECT	GO:0030955~potassium ion binding	4	0.00198873	0.0725867	SLC24A3, PKLR, ATP1A2, KCNJ11	1218	9	10722	3.91242	1	0.772001	70.5577
GOTERM_MF_DIRECT	GO:0015175~neutral amino acid transmembrane transporter activity	4	0.00198873	0.0725867	SLC1A4, SLC3A2, SLC7A5, SLC43A2	1218	9	10722	3.91242	1	0.772001	70.5577
GOTERM_MF_DIRECT	GO:0016876~ligase activity, forming aminoacyl-tRNA and related compounds	4	0.00198873	0.0725867	TARS, AARS, EPRS, EARS2	1218	9	10722	3.91242	1	0.772001	70.5577
UP_SEQ_FEATURE	domain:ABC transporter 1	6	0.0029831	0.0186202	ABCB1A, ABCB1B, ABCC3, ABCA1, ABCA4, ABCA3	1272	15	11563	3.63616	1	0.772456	28.7063
UP_SEQ_FEATURE	region of interest:Segment H5 (pore-forming)	6	0.0029831	0.0186202	KCNS3, KCNB1, KCNF1, KCNQ2, KCNQ1, KCNG1	1272	15	11563	3.63616	1	0.772456	28.7063
UP_SEQ_FEATURE	domain:ABC transporter 2	6	0.0029831	0.0186202	ABCB1A, ABCB1B, ABCC3, ABCA1, ABCA4, ABCA3	1272	15	11563	3.63616	1	0.772456	28.7063
UP_SEQ_FEATURE	metal ion-binding site:Zinc; in inhibited form	6	0.0029831	0.0186202	ADAMTS15, ADAMTS1, MMP15, MMP14, ADAM15, MMP24	1272	15	11563	3.63616	1	0.772456	28.7063
INTERPRO	IPR006116:2-5-oligoadenylate synthetase, N-terminal	4	0.00198873	0.0512841	OAS1B, OAS3, OAS1A, OAS1G	1356	8	12069	4.45022	1	0.773339	59.3071
INTERPRO	IPR001090:Ephrin receptor ligand binding domain	4	0.00198873	0.0512841	EPHB6, EPHB4, EPHA1, EPHB2	1356	8	12069	4.45022	1	0.773339	59.3071
INTERPRO	IPR016257:Tyrosine-protein kinase, ephrin receptor	4	0.00198873	0.0512841	EPHB6, EPHB4, EPHA1, EPHB2	1356	8	12069	4.45022	1	0.773339	59.3071
INTERPRO	IPR001426:Tyrosine-protein kinase, receptor class V, conserved site	4	0.00198873	0.0512841	EPHB6, EPHB4, EPHA1, EPHB2	1356	8	12069	4.45022	1	0.773339	59.3071
GOTERM_BP_DIRECT	GO:0030324~lung development	17	0.00845212	0.0320196	TSHZ3, RAB3A, LIPA, FOXA2, NKX2-9, FOXA1, MMP14, CCDC39, KDR, HES1, NOTCH1, CTGF, AARD, CUX1, ADAMTS2, NFIB, SIM2	1253	87	11126	1.73507	1	0.776436	45.5829
GOTERM_BP_DIRECT	GO:0048010~vascular endothelial growth factor receptor signaling pathway	7	0.00348028	0.0307004	PRKD1, FLT1, NRP1, PGF, FLT4, FOXC2, KDR	1253	22	11126	2.82529	1	0.777006	44.1794
GOTERM_BP_DIRECT	GO:0008284~positive regulation of cell proliferation	50	0.0248592	0.0328762	CLDN7, EDN3, CDX2, PTGS2, OSMR, PGF, CXCR2, PAX3, EDNRA, EDNRB, S1PR1, NCCRP1, CTGF, SCX, PTGER4, EFNB2, MLXIPL, RASIP1, HMGA2, HES1, SMO, CCND2, HIPK2, PDGFRB, LAMC2, CTSH, GLP1R, ALOX12, ADORA2B, CLU, CNTFR, TSC22D1, EGF, INSM1, KLF5, SHMT2, CRIP2, FLT4, TBX1, STAT1, EPHA1, KDR, IL6RA, PLA2G4A, NOTCH1, SFRP1, ETS1, SFRP2, INS2, WNT7A	1253	335	11126	1.3253	1	0.778221	46.4764
GOTERM_BP_DIRECT	GO:0019882~antigen processing and presentation	8	0.00397747	0.0319018	H2-K1, H2-Q2, RAB32, FLT3, GM11127, H2-D1, PSMB8, PSMB9	1253	28	11126	2.537	1	0.778837	45.459
GOTERM_BP_DIRECT	GO:0006954~inflammatory response	26	0.0129268	0.0328221	C3AR1, RARRES2, PTGS2, C3, TLR2, TLR3, IL17RE, NRADD, PTGIR, SMPDL3B, SEMA7A, IL1RAP, CXCR6, VNN1, ADAM8, IL1A, LIPA, ECM1, AIM2, PRKD1, TNFRSF10B, CCR4, STAB1, PLA2G7, KDM6B, BMP6	1253	152	11126	1.51886	1	0.781227	46.4203
GOTERM_BP_DIRECT	GO:0030182~neuron differentiation	16	0.00795494	0.0317896	IER2, EDN3, CDK5R1, BRSK2, EN1, GAS7, DDIT4, WNT4, NOTCH1, S1PR1, BTG2, LHX2, HIPK2, DYNC2H1, ID3, TUBB3	1253	80	11126	1.7759	1	0.781325	45.3407
GOTERM_BP_DIRECT	GO:0045597~positive regulation of cell differentiation	9	0.00447465	0.0317141	INSM1, EDN3, CCNE1, CDX2, CTGF, CLU, EOMES, BMP7, GLP1R	1253	34	11126	2.35045	1	0.784229	45.2609
INTERPRO	IPR001664:Intermediate filament protein	7	0.00348028	0.0540691	PRPH, DES, KRT80, KRT7, KRT79, VIM, IFFO1	1356	25	12069	2.49212	1	0.786504	61.2998
GOTERM_BP_DIRECT	GO:0061384~heart trabecula morphogenesis	4	0.00198873	0.0351221	NOTCH1, S1PR1, BMP7, NFATC1	1253	7	11126	5.07399	1	0.786703	48.7532
GOTERM_BP_DIRECT	GO:0050953~sensory perception of light stimulus	4	0.00198873	0.0351221	MYO7A, USH1G, USH1C, CDH23	1253	7	11126	5.07399	1	0.786703	48.7532
GOTERM_BP_DIRECT	GO:0010828~positive regulation of glucose transport	4	0.00198873	0.0351221	C3, AK1, MET, AOC3	1253	7	11126	5.07399	1	0.786703	48.7532
GOTERM_BP_DIRECT	GO:0034340~response to type I interferon	4	0.00198873	0.0351221	SHMT2, ISG15, STAT1, MX2	1253	7	11126	5.07399	1	0.786703	48.7532
GOTERM_BP_DIRECT	GO:0007229~integrin-mediated signaling pathway	14	0.00696057	0.0341045	VAV3, ADAMTS14, ADAMTS20, ITGA11, ITGB4, ITGA2, ITGA4, CTGF, SEMA7A, CIB2, ADAM8, SYK, ITGA2B, ADAM15	1253	67	11126	1.85542	1	0.787087	47.7332
GOTERM_MF_DIRECT	GO:0005262~calcium channel activity	9	0.00447465	0.0770064	TRPM6, SLC24A3, RYR1, TRPV4, CACNA1E, ITPR3, CACNA2D2, PKD2L1, CACNA1B	1218	40	10722	1.98067	1	0.787235	72.7536
GOTERM_BP_DIRECT	GO:2000041~negative regulation of planar cell polarity pathway involved in axis elongation	3	0.00149155	0.0351177	SFRP5, SFRP1, SFRP2	1253	3	11126	8.87949	1	0.790032	48.7489
GOTERM_BP_DIRECT	GO:0070278~extracellular matrix constituent secretion	3	0.00149155	0.0351177	CTGF, CREB3L1, ENG	1253	3	11126	8.87949	1	0.790032	48.7489
GOTERM_BP_DIRECT	GO:0042590~antigen processing and presentation of exogenous peptide antigen via MHC class I	3	0.00149155	0.0351177	H2-K1, IFI30, FCGR3	1253	3	11126	8.87949	1	0.790032	48.7489
GOTERM_BP_DIRECT	GO:0050891~multicellular organismal water homeostasis	3	0.00149155	0.0351177	TRPV4, SCNN1B, SCNN1A	1253	3	11126	8.87949	1	0.790032	48.7489
GOTERM_BP_DIRECT	GO:0060666~dichotomous subdivision of terminal units involved in salivary gland branching	3	0.00149155	0.0351177	NRP1, PLXNA1, PLXND1	1253	3	11126	8.87949	1	0.790032	48.7489
GOTERM_BP_DIRECT	GO:0072278~metanephric comma-shaped body morphogenesis	3	0.00149155	0.0351177	PAX8, PDGFRB, WT1	1253	3	11126	8.87949	1	0.790032	48.7489
GOTERM_BP_DIRECT	GO:0035989~tendon development	3	0.00149155	0.0351177	SCX, COL11A1, COL5A1	1253	3	11126	8.87949	1	0.790032	48.7489
GOTERM_BP_DIRECT	GO:0086016~AV node cell action potential	3	0.00149155	0.0351177	CACNA1G, SCN4B, SCN5A	1253	3	11126	8.87949	1	0.790032	48.7489
GOTERM_BP_DIRECT	GO:0097374~sensory neuron axon guidance	3	0.00149155	0.0351177	NRP2, NRP1, GBX1	1253	3	11126	8.87949	1	0.790032	48.7489
GOTERM_BP_DIRECT	GO:0048791~calcium ion-regulated exocytosis of neurotransmitter	6	0.0029831	0.0348836	SYT5, SYT8, STX1B, SYTL1, SYT17, RIMS4	1253	17	11126	3.13394	1	0.791196	48.5159
GOTERM_BP_DIRECT	GO:0003333~amino acid transmembrane transport	6	0.0029831	0.0348836	SLC38A4, SLC7A3, SLC7A2, SLC7A1, SLC7A5, SLC7A7	1253	17	11126	3.13394	1	0.791196	48.5159
GOTERM_BP_DIRECT	GO:0001708~cell fate specification	6	0.0029831	0.0348836	SMO, NOTCH1, APC2, FOXA2, CDON, TBX1	1253	17	11126	3.13394	1	0.791196	48.5159
GOTERM_MF_DIRECT	GO:0004252~serine-type endopeptidase activity	13	0.00646338	0.0792786	KLK6, KLK8, HPN, KLK4, C1RL, CTSC, HTRA3, PRSS42, PRSS23, TMPRSS6, CTSH, PRSS12, TMPRSS4	1218	68	10722	1.68292	1	0.792086	73.8218
GOTERM_MF_DIRECT	GO:0046961~proton-transporting ATPase activity, rotational mechanism	6	0.0029831	0.08127	TCIRG1, ATP6V1C2, ATP6V0E2, ATP6V1E1, ATP6V0A4, ATP6V1F	1218	21	10722	2.51513	1	0.795539	74.7255
UP_SEQ_FEATURE	domain:SRCR	4	0.00198873	0.0205204	LGALS3BP, HPN, SCARA5, TMPRSS4	1272	6	11563	6.06027	1	0.796317	31.1509
GOTERM_BP_DIRECT	GO:0048844~artery morphogenesis	7	0.00348028	0.0377055	HES1, CHD7, NRP1, FOXC2, TBX1, PRDM1, ENG	1253	23	11126	2.70245	1	0.800431	51.2589
GOTERM_BP_DIRECT	GO:0071526~semaphorin-plexin signaling pathway	8	0.00397747	0.0381059	SEMA6B, SEMA6C, NRP1, PLXNA1, CRMP1, SEMA4F, MET, PLXND1	1253	29	11126	2.44951	1	0.800726	51.6367
GOTERM_BP_DIRECT	GO:0048754~branching morphogenesis of an epithelial tube	8	0.00397747	0.0381059	NOTCH1, WNT4, MET, RASIP1, BMP7, MMP14, EGF, KDR	1253	29	11126	2.44951	1	0.800726	51.6367
GOTERM_BP_DIRECT	GO:0007626~locomotory behavior	13	0.00646338	0.0370881	PAK6, ZFP385A, CHD7, ADORA2A, HEXA, SLC18A2, APBA2, CACNA1E, SLC22A5, FIG4, CACNA1B, CDH23, ESPN	1253	61	11126	1.89235	1	0.80145	50.6709
GOTERM_BP_DIRECT	GO:0019226~transmission of nerve impulse	5	0.00248592	0.037677	S1PR1, DMRT3, CACNA1E, KCNQ2, JAM3	1253	12	11126	3.69979	1	0.803375	51.2319
GOTERM_BP_DIRECT	GO:0009950~dorsal/ventral axis specification	5	0.00248592	0.037677	MDFI, WNT3, SFRP1, PAX6, VAX2	1253	12	11126	3.69979	1	0.803375	51.2319
GOTERM_BP_DIRECT	GO:0006357~regulation of transcription from RNA polymerase II promoter	48	0.0238648	0.038915	GLIS3, TSHZ3, HMGN3, FOSL2, CDX2, FOXA2, ONECUT1, FOXA3, MITF, PAX6, TCEAL8, TCEAL7, PAX3, CITED4, TCF7L1, WT1, TAF7L, ATP2B4, TCEA3, POU2F3, POU3F1, FOSL1, NFATC1, KLF5, TTC21B, RFX5, CEBPG, ZFP704, FOXA1, ZHX2, MLXIPL, EOMES, VAX2, TBX1, HES6, LPIN1, ECM1, AHR, NKX6-1, PRKCB, HES1, ATF5, NOTCH1, IRF5, NUPR1, ETS1, HEYL, NFE2L3	1253	323	11126	1.31955	1	0.804465	52.3917
INTERPRO	IPR001849:Pleckstrin homology domain	35	0.0174014	0.0596459	ARHGEF26, CYTH4, ASAP3, RASAL2, PLCL1, ARHGAP20, TIAM2, PLCH2, PLEKHG6, ARHGAP42, RASA4, IQSEC2, ARHGEF4, ITK, CNKSR1, ARHGEF2, VAV3, OSBPL6, ARHGEF5, STAP2, DGKK, DGKH, ELMO3, PRKD1, PLEKHA3, RASGRF2, RASGRF1, DEF6, ACAP1, OPHN1, PLEKHN1, GRB7, DNM1, SH3BP2, PLEKHA1	1356	231	12069	1.34855	1	0.814303	65.0171
GOTERM_BP_DIRECT	GO:0030308~negative regulation of cell growth	19	0.00944649	0.0412461	ACVRL1, BST2, ENPP1, CRYAB, FHL1, RRAD, OSGIN1, HSPA1A, SESN2, WT1, SLIT3, CDKN1A, SERPINE2, SFRP1, SFRP2, TCHP, CDA, TNK1, ADAM15	1253	104	11126	1.62221	1	0.820074	54.5051
INTERPRO	IPR013106:Immunoglobulin V-set	13	0.00646338	0.0617114	PVR, HAPLN3, PSG29, CADM1, VTCN1, SLAMF9, SCN4B, MXRA8, PSG22, JAM2, SIRPA, JAM3, CD200	1356	66	12069	1.75312	1	0.820742	66.3065
INTERPRO	IPR001627:Semaphorin/CD100 antigen	7	0.00348028	0.0638806	SEMA6B, SEMA6C, PLXNA1, SEMA4F, SEMA7A, MET, PLXND1	1356	26	12069	2.39627	1	0.823053	67.6124
INTERPRO	IPR010579:MHC class I, alpha chain, C-terminal	3	0.00149155	0.064755	H2-K1, H2-Q2, H2-D1	1356	4	12069	6.67533	1	0.823134	68.1252
INTERPRO	IPR004755:Cationic amino acid transport permease	3	0.00149155	0.064755	SLC7A3, SLC7A2, SLC7A1	1356	4	12069	6.67533	1	0.823134	68.1252
INTERPRO	IPR003054:Type II keratin	3	0.00149155	0.064755	KRT80, KRT7, KRT79	1356	4	12069	6.67533	1	0.823134	68.1252
INTERPRO	IPR000863:Sulfotransferase domain	5	0.00248592	0.0631528	SULT4A1, HS3ST6, HS3ST1, CHST3, HS3ST3B1	1356	14	12069	3.17873	1	0.823709	67.1797
UP_SEQ_FEATURE	domain:EGF-like 5	8	0.00397747	0.0235207	SNED1, SCUBE3, STAB1, DLL3, DLK1, MEGF6, EGF, SLIT3	1272	27	11563	2.69345	1	0.831525	34.8502
GOTERM_BP_DIRECT	GO:0008217~regulation of blood pressure	9	0.00447465	0.0432842	EDNRA, C3AR1, EDNRB, ACVRL1, PTGS2, ATP1A2, AHR, CACNA1B, AOC3	1253	36	11126	2.21987	1	0.832154	56.2798
GOTERM_BP_DIRECT	GO:0045840~positive regulation of mitotic nuclear division	6	0.0029831	0.0439613	EDN3, MET, PDGFRB, INS2, EGF, IL1A	1253	18	11126	2.95983	1	0.834064	56.8547
GOTERM_BP_DIRECT	GO:0006865~amino acid transport	8	0.00397747	0.045051	SLC38A4, SLC6A9, SLC7A3, SLC7A2, SLC7A1, SLC3A2, SLC7A5, SLC7A7	1253	30	11126	2.36786	1	0.838703	57.765
GOTERM_BP_DIRECT	GO:0045494~photoreceptor cell maintenance	8	0.00397747	0.045051	BBS1, USH1G, CDHR1, USH1C, CIB2, ABCA4, CLN8, CDH23	1253	30	11126	2.36786	1	0.838703	57.765
GOTERM_BP_DIRECT	GO:0007628~adult walking behavior	8	0.00397747	0.045051	CHD7, DMRT3, HEXA, HIPK2, CNTN2, GBX1, ZIC1, CLN8	1253	30	11126	2.36786	1	0.838703	57.765
INTERPRO	IPR018116:Somatotropin hormone, conserved site	4	0.00198873	0.0706648	PRL2C5, PRL3D1, PRL4A1, PRL7D1	1356	9	12069	3.95575	1	0.845995	71.3958
INTERPRO	IPR000906:ZU5	4	0.00198873	0.0706648	ANK2, UNC5A, ANK3, UNC5CL	1356	9	12069	3.95575	1	0.845995	71.3958
GOTERM_BP_DIRECT	GO:0001558~regulation of cell growth	10	0.00497183	0.0468114	SGK1, TMC8, SGK2, CTGF, WFDC1, HTRA3, PTTG1, IGFBP3, IL3RA, IGFBP5	1253	43	11126	2.065	1	0.847405	59.1973
GOTERM_BP_DIRECT	GO:0042981~regulation of apoptotic process	25	0.0124296	0.0475207	BID, MITF, CASP6, TNFRSF11A, NOD1, PTGIS, ANK2, PAX8, BCL3, TMEM102, SGK1, SGK2, MADD, HRK, PPIF, NME4, CARD14, TNFRSF10B, RASSF6, SARM1, SFRP2, EIF2AK2, GDF15, BMP6, BMP8A	1253	150	11126	1.47991	1	0.849176	59.7613
UP_SEQ_FEATURE	repeat:LRR 7	16	0.00795494	0.0264467	VASN, PODN, RTN4RL1, LRRC8B, RXFP2, LRRC8D, TLR2, RTN4R, LRIG1, TLR3, LRRC15, PRELP, SLIT3, LINGO1, NOD1, LRRC9	1272	80	11563	1.81808	1	0.851921	38.2764
GOTERM_MF_DIRECT	GO:0031683~G-protein beta/gamma-subunit complex binding	5	0.00248592	0.0991012	GNAL, GNA15, GNAI1, PIK3R5, ADORA1	1218	16	10722	2.75092	1	0.854161	81.6107
GOTERM_MF_DIRECT	GO:0004602~glutathione peroxidase activity	5	0.00248592	0.0991012	MGST3, GSTK1, LTC4S, MGST1, GSTM7	1218	16	10722	2.75092	1	0.854161	81.6107
GOTERM_BP_DIRECT	GO:0070588~calcium ion transmembrane transport	11	0.00546902	0.0491227	TRPM6, ATP2B4, SLC24A3, RYR1, CACNA1G, TRPV4, CACNA1E, ITPR3, CACNA2D2, PKD2L1, CACNA1B	1253	50	11126	1.95349	1	0.856189	61.0081
UP_SEQ_FEATURE	compositionally biased region:Cys-rich	15	0.00745775	0.0262352	ADAMTS20, ADAMTS15, EPHA1, EPHB4, EPHB2, PRELP, SPRY1, CHIC1, EPHB6, ADAMTS10, ADAMTS1, SGCE, SYT17, ADAMTS2, ADAM15	1272	73	11563	1.86789	1	0.856403	38.0346
GOTERM_BP_DIRECT	GO:0001816~cytokine production	5	0.00248592	0.0497065	MAF, ITK, LIPA, G6PDX, NFATC2	1253	13	11126	3.41519	1	0.857044	61.4533
GOTERM_BP_DIRECT	GO:0002042~cell migration involved in sprouting angiogenesis	5	0.00248592	0.0497065	NRP1, EFNB2, GPLD1, EPHB4, KDR	1253	13	11126	3.41519	1	0.857044	61.4533
INTERPRO	IPR011029:Death-like domain	11	0.00546902	0.0754325	DDX58, IFIH1, CARD14, TNFRSF10B, NOD1, ANK2, UNC5A, ANK3, UNC5CL, NRADD, AIM2	1356	54	12069	1.81305	1	0.86129	73.8012
GOTERM_BP_DIRECT	GO:0035455~response to interferon-alpha	4	0.00198873	0.0515808	BST2, IFITM3, EIF2AK2, ADAR	1253	8	11126	4.43974	1	0.865003	62.8503
GOTERM_BP_DIRECT	GO:0035456~response to interferon-beta	4	0.00198873	0.0515808	BST2, IFITM3, XAF1, STAT1	1253	8	11126	4.43974	1	0.865003	62.8503
GOTERM_BP_DIRECT	GO:0003323~type B pancreatic cell development	4	0.00198873	0.0515808	INSM1, SMO, NKX6-1, BMP6	1253	8	11126	4.43974	1	0.865003	62.8503
GOTERM_BP_DIRECT	GO:0019953~sexual reproduction	4	0.00198873	0.0515808	TEX19.1, HEXA, LEPR, VGF	1253	8	11126	4.43974	1	0.865003	62.8503
GOTERM_BP_DIRECT	GO:0008015~blood circulation	4	0.00198873	0.0515808	ACVRL1, CHD7, STAT1, AHR	1253	8	11126	4.43974	1	0.865003	62.8503
GOTERM_BP_DIRECT	GO:0032480~negative regulation of type I interferon production	4	0.00198873	0.0515808	DDX58, NMI, PELI3, DHX58	1253	8	11126	4.43974	1	0.865003	62.8503
GOTERM_BP_DIRECT	GO:0050927~positive regulation of positive chemotaxis	4	0.00198873	0.0515808	S1PR1, CCR4, ITGA2, KDR	1253	8	11126	4.43974	1	0.865003	62.8503
GOTERM_BP_DIRECT	GO:0015893~drug transport	4	0.00198873	0.0515808	ABCB1A, ABCB1B, SLC18A2, ABCC3	1253	8	11126	4.43974	1	0.865003	62.8503
INTERPRO	IPR015526:Frizzled/secreted frizzled-related protein	5	0.00248592	0.0787441	SFRP5, SMO, SFRP1, SFRP2, FZD1	1356	15	12069	2.96681	1	0.869785	75.3586
INTERPRO	IPR013128:Peptidase C1A, papain	5	0.00248592	0.0787441	CTSJ, TPBPA, CTSO, CTSC, CTSH	1356	15	12069	2.96681	1	0.869785	75.3586
INTERPRO	IPR013162:CD80-like, immunoglobulin C2-set	5	0.00248592	0.0787441	ALCAM, PVR, CADM1, KIRREL, TMEM25	1356	15	12069	2.96681	1	0.869785	75.3586
INTERPRO	IPR008993:Tissue inhibitor of metalloproteinases-like, OB-fold	5	0.00248592	0.0787441	SFRP5, SFRP1, C3, SFRP2, ADAMTSL5	1356	15	12069	2.96681	1	0.869785	75.3586
INTERPRO	IPR013517:FG-GAP repeat	5	0.00248592	0.0787441	GPLD1, ITGA11, ITGA2, ITGA4, ITGA2B	1356	15	12069	2.96681	1	0.869785	75.3586
INTERPRO	IPR008967:p53-like transcription factor, DNA-binding	8	0.00397747	0.079814	STAT6, EOMES, TBX1, STAT1, NFATC2, RUNX3, STAT2, NFATC1	1356	34	12069	2.09422	1	0.870049	75.8427
INTERPRO	IPR010987:Glutathione S-transferase, C-terminal-like	8	0.00397747	0.079814	GSTM1, GSTM2, CARS, CLIC6, EPRS, GSTO2, GSTM7, MARS	1356	34	12069	2.09422	1	0.870049	75.8427
GOTERM_BP_DIRECT	GO:0008344~adult locomotory behavior	10	0.00497183	0.0532151	DMBX1, FOXA2, CCND2, HIPK2, CNP, EN1, ATP1A2, CLN8, DNM1, CDH23	1253	44	11126	2.01807	1	0.87119	64.0291
GOTERM_BP_DIRECT	GO:0051091~positive regulation of sequence-specific DNA binding transcription factor activity	14	0.00696057	0.0566609	HMGN3, ARHGEF5, FOXA1, TRIM14, FZD1, NFAM1, HMGA2, TRIM62, TRIM21, MID2, TNFRSF11A, HIPK2, FOSL1, IFRD1	1253	72	11126	1.72657	1	0.87236	66.3997
GOTERM_BP_DIRECT	GO:0002250~adaptive immune response	12	0.0059662	0.0562928	ALCAM, RNF125, ITK, TNFRSF11A, VTCN1, TAP2, TAP1, EOMES, PRDM1, JAM3, SYK, PRKCB	1253	58	11126	1.83714	1	0.872795	66.1537
GOTERM_BP_DIRECT	GO:0030819~positive regulation of cAMP biosynthetic process	7	0.00348028	0.054563	PTGIR, ADORA2B, PTGER4, ADORA2A, RXFP2, AKAP5, ABCA1	1253	25	11126	2.48626	1	0.873339	64.9748
GOTERM_BP_DIRECT	GO:0045880~positive regulation of smoothened signaling pathway	7	0.00348028	0.054563	SMO, SCUBE3, SFRP1, FOXA2, IFT172, FOXA1, DYNC2H1	1253	25	11126	2.48626	1	0.873339	64.9748
GOTERM_BP_DIRECT	GO:0006821~chloride transport	9	0.00447465	0.0573367	GABRE, SLC26A6, CLCN2, GABRA4, SLC26A7, TTYH2, CLIC6, ANO1, ANO8	1253	38	11126	2.10304	1	0.873386	66.847
GOTERM_BP_DIRECT	GO:0008584~male gonad development	16	0.00795494	0.0555353	TEX19.1, TESC, STAR, RXFP2, TLR3, HMGA2, MMP14, WT1, KDR, GATA1, WNT4, TNFRSF10B, NUPR1, SFRP1, SFRP2, ADAM15	1253	86	11126	1.652	1	0.873582	65.6421
GOTERM_BP_DIRECT	GO:0042391~regulation of membrane potential	11	0.00546902	0.0552031	SLC26A6, XIRP1, SLC26A7, GRIK3, ANO1, CACNA1G, DPP6, KCNJ11, KCNQ1, HCN3, RIMS4	1253	51	11126	1.91518	1	0.874211	65.4155
GOTERM_BP_DIRECT	GO:0010765~positive regulation of sodium ion transport	6	0.0029831	0.0543224	GPD1L, SGK1, SGK2, ANK3, SCN4B, SCN5A	1253	19	11126	2.80405	1	0.874432	64.8077
GOTERM_BP_DIRECT	GO:0030336~negative regulation of cell migration	15	0.00745775	0.0562346	MAGI2, ACVRL1, PODN, BST2, DPYSL3, EPHA1, WNT4, KISS1R, SFRP1, SFRP2, TRP53INP1, STC1, ENG, IGFBP5, ADAM15	1253	79	11126	1.68598	1	0.874722	66.1147
GOTERM_BP_DIRECT	GO:0042127~regulation of cell proliferation	27	0.013424	0.0604511	BID, FRK, PTGS2, MITF, EGLN3, NR3C2, NRADD, STAT6, TNFRSF11A, TES, TXNIP, ITK, SGK1, SGK2, SIX3, TEAD1, BRCA2, TNFSF9, ATF5, PLA2G4A, NOTCH1, TNFRSF10B, SFRP2, TNK1, PRDM1, WNT7A, SRMS	1253	169	11126	1.41862	1	0.885199	68.8362
GOTERM_BP_DIRECT	GO:0030177~positive regulation of Wnt signaling pathway	8	0.00397747	0.0612427	DIXDC1, ATP6V1C2, WNT3, DACT1, SULF2, SFRP1, RSPO1, TLR2	1253	32	11126	2.21987	1	0.886503	69.3235
GOTERM_BP_DIRECT	GO:0006935~chemotaxis	11	0.00546902	0.0617584	C3AR1, RARRES2, FLT1, S1PR1, CCR4, CXCR6, ECSCR, PDGFRB, CXCR2, CCL28, CMTM5	1253	52	11126	1.87835	1	0.886641	69.6371
GOTERM_BP_DIRECT	GO:0051216~cartilage development	11	0.00546902	0.0617584	BBS1, SULF2, SFRP2, PAX7, FBXW4, BMP7, SCX, COL11A1, WNT7A, BMP8A, BMP6	1253	52	11126	1.87835	1	0.886641	69.6371
GOTERM_BP_DIRECT	GO:0014070~response to organic cyclic compound	12	0.0059662	0.0624714	EDNRB, ICAM1, TNFRSF10B, SFRP1, BTG2, PTGES, EPHX1, MMP14, SCN5A, CPT1A, AHR, CACNA1B	1253	59	11126	1.806	1	0.887582	70.0656
INTERPRO	IPR013151:Immunoglobulin	7	0.00348028	0.086423	IL1R2, PTPRM, FLT3, PDGFRB, MERTK, CD200, IL6RA	1356	28	12069	2.22511	1	0.887971	78.6409
GOTERM_BP_DIRECT	GO:0007548~sex differentiation	5	0.00248592	0.0635887	CYP17A1, WNT4, DMRT3, DMRT2, CNTFR	1253	14	11126	3.17125	1	0.890109	70.7256
GOTERM_BP_DIRECT	GO:0030501~positive regulation of bone mineralization	7	0.00348028	0.0644517	WNT4, ISG15, FAM20C, TGFB3, FBN2, BMP7, BMP6	1253	26	11126	2.39063	1	0.891567	71.226
GOTERM_BP_DIRECT	GO:0035924~cellular response to vascular endothelial growth factor stimulus	6	0.0029831	0.065973	PRKD1, NOTCH1, FLT1, NRP1, FLT4, KDR	1253	20	11126	2.66385	1	0.891757	72.0884
GOTERM_BP_DIRECT	GO:0021772~olfactory bulb development	6	0.0029831	0.065973	FEZF1, CHD7, CRTAC1, LHX2, PAX6, EOMES	1253	20	11126	2.66385	1	0.891757	72.0884
GOTERM_BP_DIRECT	GO:0006564~L-serine biosynthetic process	3	0.00149155	0.0650268	SHMT2, PSPH, PSAT1	1253	4	11126	6.65962	1	0.891891	71.555
GOTERM_BP_DIRECT	GO:0034123~positive regulation of toll-like receptor signaling pathway	3	0.00149155	0.0650268	TLR2, TLR3, PIK3AP1	1253	4	11126	6.65962	1	0.891891	71.555
GOTERM_BP_DIRECT	GO:0060452~positive regulation of cardiac muscle contraction	3	0.00149155	0.0650268	RGS2, CTGF, KCNQ1	1253	4	11126	6.65962	1	0.891891	71.555
GOTERM_BP_DIRECT	GO:0061448~connective tissue development	3	0.00149155	0.0650268	FOXA2, CTGF, FOXA1	1253	4	11126	6.65962	1	0.891891	71.555
GOTERM_BP_DIRECT	GO:0021527~spinal cord association neuron differentiation	3	0.00149155	0.0650268	LMO4, PAX7, PAX3	1253	4	11126	6.65962	1	0.891891	71.555
GOTERM_BP_DIRECT	GO:0021798~forebrain dorsal/ventral pattern formation	3	0.00149155	0.0650268	TTC21B, SIX3, PAX6	1253	4	11126	6.65962	1	0.891891	71.555
GOTERM_BP_DIRECT	GO:0060087~relaxation of vascular smooth muscle	3	0.00149155	0.0650268	ADORA2B, RGS2, ADORA1	1253	4	11126	6.65962	1	0.891891	71.555
GOTERM_BP_DIRECT	GO:0072284~metanephric S-shaped body morphogenesis	3	0.00149155	0.0650268	PAX8, PDGFRB, WT1	1253	4	11126	6.65962	1	0.891891	71.555
GOTERM_BP_DIRECT	GO:0010529~negative regulation of transposition	3	0.00149155	0.0650268	TEX19.1, APOBEC3, DNMT3L	1253	4	11126	6.65962	1	0.891891	71.555
GOTERM_BP_DIRECT	GO:0032609~interferon-gamma production	3	0.00149155	0.0650268	ITK, EOMES, RUNX3	1253	4	11126	6.65962	1	0.891891	71.555
GOTERM_BP_DIRECT	GO:1903352~L-ornithine transmembrane transport	3	0.00149155	0.0650268	SLC7A3, SLC7A2, SLC7A1	1253	4	11126	6.65962	1	0.891891	71.555
GOTERM_BP_DIRECT	GO:1903849~positive regulation of aorta morphogenesis	3	0.00149155	0.0650268	NOTCH1, EFNB2, EPHB4	1253	4	11126	6.65962	1	0.891891	71.555
GOTERM_BP_DIRECT	GO:0006875~cellular metal ion homeostasis	3	0.00149155	0.0650268	MT1, LETM2, MT4	1253	4	11126	6.65962	1	0.891891	71.555
GOTERM_BP_DIRECT	GO:0086015~SA node cell action potential	3	0.00149155	0.0650268	ANK2, CACNA1G, SCN5A	1253	4	11126	6.65962	1	0.891891	71.555
GOTERM_BP_DIRECT	GO:0015879~carnitine transport	3	0.00149155	0.0650268	SLC22A21, SLC22A5, PDZK1	1253	4	11126	6.65962	1	0.891891	71.555
GOTERM_BP_DIRECT	GO:0035815~positive regulation of renal sodium excretion	3	0.00149155	0.0650268	EDNRB, PTGER4, ADORA2A	1253	4	11126	6.65962	1	0.891891	71.555
GOTERM_BP_DIRECT	GO:0090175~regulation of establishment of planar polarity	3	0.00149155	0.0650268	SFRP5, SFRP1, SFRP2	1253	4	11126	6.65962	1	0.891891	71.555
GOTERM_BP_DIRECT	GO:0001973~adenosine receptor signaling pathway	3	0.00149155	0.0650268	ADORA2B, ADORA2A, ADORA1	1253	4	11126	6.65962	1	0.891891	71.555
GOTERM_BP_DIRECT	GO:0045893~positive regulation of transcription, DNA-templated	63	0.0313226	0.0659473	ACVRL1, CDX2, FOSL2, FOXA2, MITF, TGFB3, PAX6, PAX3, ZIC1, ZKSCAN3, CITED4, GATA1, WNT4, ZFP90, PAX8, ATOH8, MYB, SCX, SOX10, PCBD2, MLXIPL, EOMES, PIM2, AHR, DDIT3, HES1, SMO, HIPK2, FOXC2, TGFB1I1, NFE2L3, MDK, WT1, TRF, NPAS2, LHX2, TRP53INP1, BCL3, POU3F1, EGF, NFATC2, RUNX3, NFATC1, KLF5, KLF7, TESC, FZD1, BRCA2, TBX1, AFF1, STAT1, FEZF1, ATF5, NOTCH1, SFRP1, IRF6, ETS1, IRF7, HIVEP3, BMP7, …	1253	456	11126	1.22677	1	0.89351	72.074
INTERPRO	IPR016201:Plexin-like fold	8	0.00397747	0.0905729	SEMA6B, SEMA6C, PLXNA1, SEMA4F, SEMA7A, MET, ITGB4, PLXND1	1356	35	12069	2.03439	1	0.893731	80.2388
GOTERM_BP_DIRECT	GO:0030178~negative regulation of Wnt signaling pathway	10	0.00497183	0.0676672	MDFI, SFRP5, GSC, DACT1, NXN, APC2, SFRP1, SFRP2, SIX3, HMGA2	1253	46	11126	1.93032	1	0.89618	73.02
INTERPRO	IPR018097:EGF-like calcium-binding, conserved site	12	0.0059662	0.0904057	FBLN1, NOTCH1, SNED1, SCUBE3, CRTAC1, COMP, SUSD1, FBLN7, FBN2, MEGF6, EGF, SLIT3	1356	63	12069	1.69532	1	0.896249	80.1766
INTERPRO	IPR005331:Sulfotransferase	4	0.00198873	0.0927894	CHST10, CHST8, CHST13, HS6ST1	1356	10	12069	3.56018	1	0.896792	81.0454
GOTERM_BP_DIRECT	GO:0046330~positive regulation of JNK cascade	11	0.00546902	0.0687967	DIXDC1, NOD1, CTGF, FLT4, HIPK2, GADD45G, UNC5CL, TRPV4, TLR3, WNT7A, IL1A	1253	53	11126	1.84291	1	0.898412	73.6246
GOTERM_BP_DIRECT	GO:0034097~response to cytokine	11	0.00546902	0.0687967	STAT6, CASP6, TNFRSF11A, PTGS2, PTGES, OSMR, MAPKAPK3, TMEM102, STAT1, FOSL1, IL6RA	1253	53	11126	1.84291	1	0.898412	73.6246
INTERPRO	IPR023214:HAD-like domain	13	0.00646338	0.0962611	ATP2C2, ATP2B4, EYA2, ATP4A, CMAS, HDHD3, PHOSPHO1, ATP1A2, PSPH, LPIN1, ATP8B3, PMM1, LPIN3	1356	71	12069	1.62966	1	0.900096	82.2468
UP_SEQ_FEATURE	lipid moiety-binding region:GPI-anchor amidated serine	8	0.00397747	0.03409	GPC4, RTN4RL1, BST2, MDGA1, RTN4R, CNTN2, CD52, CNTFR	1272	29	11563	2.5077	1	0.900432	46.4414
GOTERM_BP_DIRECT	GO:0007157~heterophilic cell-cell adhesion via plasma membrane cell adhesion molecules	8	0.00397747	0.0705133	ALCAM, PVR, CADM1, L1CAM, ITGA4, CD24A, CDH4, CD200	1253	33	11126	2.1526	1	0.900839	74.5191
UP_SEQ_FEATURE	region of interest:Spacer	5	0.00248592	0.0349145	ADAMTS20, ADAMTS15, ADAMTS10, ADAMTS1, ADAMTS2	1272	12	11563	3.78767	1	0.90097	47.2585
GOTERM_BP_DIRECT	GO:0071872~cellular response to epinephrine stimulus	4	0.00198873	0.0710605	ATP2B4, STAR, PDE4B, PDE4D	1253	9	11126	3.94644	1	0.900973	74.7981
GOTERM_BP_DIRECT	GO:0021785~branchiomotor neuron axon guidance	4	0.00198873	0.0710605	NRP2, NRP1, PLXNA1, PLXND1	1253	9	11126	3.94644	1	0.900973	74.7981
GOTERM_BP_DIRECT	GO:0048845~venous blood vessel morphogenesis	4	0.00198873	0.0710605	NOTCH1, EFNB2, ENG, EPHB4	1253	9	11126	3.94644	1	0.900973	74.7981
GOTERM_BP_DIRECT	GO:0045824~negative regulation of innate immune response	4	0.00198873	0.0710605	NMI, SMPDL3B, NLRX1, DHX58	1253	9	11126	3.94644	1	0.900973	74.7981
GOTERM_BP_DIRECT	GO:0032727~positive regulation of interferon-alpha production	4	0.00198873	0.0710605	DDX58, IFIH1, FLT3, IRF7	1253	9	11126	3.94644	1	0.900973	74.7981
GOTERM_BP_DIRECT	GO:0021846~cell proliferation in forebrain	4	0.00198873	0.0710605	DIXDC1, SIX3, HMGA2, WNT7A	1253	9	11126	3.94644	1	0.900973	74.7981
GOTERM_BP_DIRECT	GO:0044342~type B pancreatic cell proliferation	4	0.00198873	0.0710605	TCF19, IGFBP3, NKX6-1, IGFBP5	1253	9	11126	3.94644	1	0.900973	74.7981
GOTERM_BP_DIRECT	GO:0009437~carnitine metabolic process	4	0.00198873	0.0710605	CPT1C, SLC22A21, SLC22A5, CPT1A	1253	9	11126	3.94644	1	0.900973	74.7981
GOTERM_BP_DIRECT	GO:0042493~response to drug	34	0.0169042	0.0701176	SRP14, ADCY1, PTGS2, STAR, PGF, ADORA2A, AQP7, ABCA1, MDK, KCNJ11, CBX7, DAD1, NFATC2, FOSL1, TXNIP, ICAM1, LPL, PTPRM, VAV3, ATP4A, FZD1, ITGA2, STAT1, NKX6-1, CPT1A, PRKCB, KDR, CDKN1A, SFRP1, ABCB1B, SFRP2, NPPC, WFDC1, MGST1	1253	226	11126	1.33585	1	0.901217	74.3155
UP_SEQ_FEATURE	site:Essential for catalytic activity	3	0.00149155	0.033571	ALDH1L1, ENPP1, ALDH1L2	1272	3	11563	9.09041	1	0.902001	45.9209
UP_SEQ_FEATURE	short sequence motif:WRPW motif	3	0.00149155	0.033571	HES1, HES6, RIPPLY3	1272	3	11563	9.09041	1	0.902001	45.9209
INTERPRO	IPR013519:Integrin alpha beta-propellor	5	0.00248592	0.0960489	GPLD1, ITGA11, ITGA2, ITGA4, ITGA2B	1356	16	12069	2.78139	1	0.902337	82.1755
INTERPRO	IPR013767:PAS fold	5	0.00248592	0.0960489	NPAS2, AHRR, HIF3A, AHR, SIM2	1356	16	12069	2.78139	1	0.902337	82.1755
INTERPRO	IPR012317:Poly(ADP-ribose) polymerase, catalytic domain	5	0.00248592	0.0960489	PARP9, PARP12, PARP14, PARP3, PARP10	1356	16	12069	2.78139	1	0.902337	82.1755
INTERPRO	IPR015615:Transforming growth factor-beta-related	5	0.00248592	0.0960489	TGFB3, BMP7, GDF15, BMP8A, BMP6	1356	16	12069	2.78139	1	0.902337	82.1755
UP_SEQ_FEATURE	domain:Orange	4	0.00198873	0.0330099	HES1, HEYL, HES6, BHLHE41	1272	7	11563	5.19452	1	0.903327	45.3529
GOTERM_BP_DIRECT	GO:0010468~regulation of gene expression	28	0.0139211	0.0728315	EDN3, TSHZ3, FOXA2, UTY, MITF, PAX6, DLK1, WT1, H19, TAPBP, RSPO1, PAX7, APBA2, MYB, INSM1, FOXA1, EOMES, EN1, STX1B, AHR, ATF5, SMO, NOTCH1, TCF19, INS2, SCARA5, KDM6B, PEG3	1253	180	11126	1.38125	1	0.905086	75.6814
GOTERM_BP_DIRECT	GO:0035914~skeletal muscle cell differentiation	9	0.00447465	0.0739785	KLF5, NOTCH1, NUPR1, BTG2, HEYL, HIVEP3, EOMES, PAX3, SCX	1253	40	11126	1.99789	1	0.905452	76.2379
GOTERM_BP_DIRECT	GO:0000122~negative regulation of transcription from RNA polymerase II promoter	78	0.0387803	0.0735923	CDX2, CPEB3, E2F8, MITF, NR6A1, PAX3, AURKB, ZKSCAN3, CBX7, GATA1, CCNE1, EDNRB, ZFP90, TRPV4, BHLHE41, MYB, GSC, FOXJ1, MLXIPL, ZHX2, EOMES, VAX2, HES6, HMGA2, LPIN1, AHR, DDIT3, HES1, SMO, DACT1, BTG2, HIPK2, FOXC2, RIPPLY3, PRDM1, NFE2L3, CUX1, PEG3, GLIS3, FRK, TRIB3, WT1, NR2C1, STAT6, AHRR, NRARP, ZFP296, OVOL1, NFATC2, RUNX3, SIM2, NFATC1, MDFI, TXNIP, KLF5, DMBX1, INSM1, MAF, RFX5, TRIM29…	1253	583	11126	1.18799	1	0.90586	76.0519
GOTERM_BP_DIRECT	GO:0048646~anatomical structure formation involved in morphogenesis	5	0.00248592	0.0792726	WNT3, FOXA2, LHX2, FOXA1, BMP7	1253	15	11126	2.95983	1	0.916313	78.6535
GOTERM_BP_DIRECT	GO:0007159~leukocyte cell-cell adhesion	5	0.00248592	0.0792726	ICAM1, L1CAM, ITGA4, CD24A, SYK	1253	15	11126	2.95983	1	0.916313	78.6535
GOTERM_BP_DIRECT	GO:0050853~B cell receptor signaling pathway	6	0.0029831	0.0789011	VAV3, NFAM1, NFATC2, SYK, PRKCB, PLEKHA1	1253	21	11126	2.537	1	0.916773	78.4918
GOTERM_BP_DIRECT	GO:0043066~negative regulation of apoptotic process	52	0.0258535	0.0787819	CLDN7, MITF, CXCR2, ADORA1, GATA1, EDNRA, EDNRB, EEF2K, NQO1, SCX, SOX10, SGK1, ADAMTS20, CRYAB, RXFP2, PROKR1, PIM2, HMGA2, FMN2, SMO, CARD14, MAD2L1, BTG2, CCND2, PDGFRB, EIF2AK2, CTSH, SLC40A1, CLN8, GLP1R, ALOX12, HAX1, CLU, HSPA1B, SYCP2, NAA38, WT1, TSC22D1, COMP, CKMT1, DAD1, BCL3, HPN, FLT4, KDR, MUC4, PPIF, ATF5, CDKN1A, SFRP1, WNT7A, ADAR	1253	372	11126	1.24122	1	0.917925	78.4397
GOTERM_BP_DIRECT	GO:0010862~positive regulation of pathway-restricted SMAD protein phosphorylation	8	0.00397747	0.0805724	RBPMS, ACVRL1, TGFB3, BMP7, GDF15, ENG, BMP8A, BMP6	1253	34	11126	2.08929	1	0.918351	79.2099
GOTERM_BP_DIRECT	GO:0060070~canonical Wnt signaling pathway	13	0.00646338	0.0823254	SFRP5, DIXDC1, WNT4, WNT3, DACT1, SFRP1, RSPO1, UTY, FZD1, INS2, EGF, WNT7A, TCF7L1	1253	69	11126	1.67295	1	0.920075	79.9387
GOTERM_BP_DIRECT	GO:0035556~intracellular signal transduction	43	0.0213789	0.0820768	ADCY1, BRSK2, PLCL1, STK32C, RGS11, NOD1, TIAM2, SH2D6, CTGF, PLCH2, DCLK3, DCLK2, INPP5D, RASA4, BLNK, NFATC1, SYK, ARHGEF4, ITK, ARHGEF2, SGK1, SGK2, VAV3, SPSB1, SOCS1, ARHGEF5, MLXIPL, DGKK, MAPK11, NPR2, DGKH, NFAM1, SOCS5, PRKCB, MAST3, PRKD1, RASGRF1, MAPK13, CHN1, PDGFRB, DEPTOR, NRGN, IGFBP5	1253	301	11126	1.2685	1	0.920842	79.8369
GOTERM_BP_DIRECT	GO:0042472~inner ear morphogenesis	10	0.00497183	0.0843591	CHD7, MYO7A, USH1G, PAX8, USH1C, TBX1, ZIC1, COL11A1, CDH23, EPHB2	1253	48	11126	1.84989	1	0.922417	80.7539
GOTERM_BP_DIRECT	GO:0007605~sensory perception of sound	15	0.00745775	0.0853265	ICAM1, HPN, USH1G, HEXA, MYO7A, LRIG1, TBX1, ESPN, CHD7, USH1C, MYH14, ATP6V0A4, COL11A1, DNM1, CDH23	1253	84	11126	1.58562	1	0.923424	81.1306
GOTERM_BP_DIRECT	GO:0071260~cellular response to mechanical stimulus	11	0.00546902	0.0843429	EDNRA, PTGS2, PTGER4, ITGA2, TLR3, GGT1, ATP1A2, MAP3K14, SCX, ENG, BMP6	1253	55	11126	1.7759	1	0.923733	80.7475
UP_SEQ_FEATURE	repeat:LRR 4	21	0.0104409	0.0406318	VASN, PODN, RTN4RL1, LRRC8B, RXFP2, LRRC8D, TLR2, RTN4R, TLR3, LRIG1, NLRX1, LRRC15, SLIT3, PRELP, ELFN1, ELFN2, LINGO1, NOD1, LGI2, LRRC9, LRFN2	1272	121	11563	1.57767	1	0.924715	52.6086
UP_SEQ_FEATURE	repeat:LRR 5	19	0.00944649	0.0399531	VASN, PODN, RTN4RL1, LRRC8B, RXFP2, LRRC8D, TLR2, RTN4R, TLR3, LRIG1, LRRC15, SLIT3, PRELP, ELFN1, ELFN2, LINGO1, NOD1, LRRC9, LRFN2	1272	106	11563	1.62941	1	0.925464	52.0015
GOTERM_BP_DIRECT	GO:0048514~blood vessel morphogenesis	7	0.00348028	0.0871618	ACVRL1, FLT1, FLT4, EFNB2, TBX1, AHR, SYK	1253	28	11126	2.21987	1	0.926435	81.8261
GOTERM_BP_DIRECT	GO:0006468~protein phosphorylation	65	0.0323169	0.089605	ACVRL1, FAM20C, AURKB, CAMKK1, CAMKK2, PAK6, CCNE1, MAP3K9, EEF2K, MLKL, CDK15, CDK14, SYK, TRPM6, SGK1, SGK2, PIM2, CDKL2, CDKL5, PRKCB, MAST3, PRKD1, MAPK4, HIPK2, RIPK3, PDGFRB, MAP3K14, EIF2AK2, NEK5, FRK, CDK5R1, STK10, PHKA1, BRSK2, MAPKAPK3, TRIB3, EPHB4, EPHB2, STK32C, EPHB6, VRK2, SBK1, DCLK3, DYRK4, DCLK2, RUNX3, ITK, FLT1, FLT3, MAML1, FLT4, PDK4, MET, MAPK11, NPR2, EPHA1, KDR, LAMA1, …	1253	482	11126	1.19744	1	0.930626	82.7144
GOTERM_BP_DIRECT	GO:0009953~dorsal/ventral pattern formation	8	0.00397747	0.091416	SMO, FOXA2, LHX2, IFT172, PAX6, DYNC2H1, EN1, WNT7A	1253	35	11126	2.0296	1	0.933241	83.3461
GOTERM_BP_DIRECT	GO:0048711~positive regulation of astrocyte differentiation	4	0.00198873	0.093292	HES1, NOTCH1, SERPINE2, BIN1	1253	10	11126	3.5518	1	0.934692	83.9774
GOTERM_BP_DIRECT	GO:1902287~semaphorin-plexin signaling pathway involved in axon guidance	4	0.00198873	0.093292	NRP2, NRP1, PLXNA1, PLXND1	1253	10	11126	3.5518	1	0.934692	83.9774
GOTERM_BP_DIRECT	GO:1990440~positive regulation of transcription from RNA polymerase II promoter in response to endoplasmic reticulum stress	4	0.00198873	0.093292	ATF6, CREB3L1, CREB3L3, DDIT3	1253	10	11126	3.5518	1	0.934692	83.9774
GOTERM_BP_DIRECT	GO:0031424~keratinization	4	0.00198873	0.093292	EVPL, PPL, SFN, IL1A	1253	10	11126	3.5518	1	0.934692	83.9774
GOTERM_BP_DIRECT	GO:0042445~hormone metabolic process	4	0.00198873	0.093292	BBS1, WNT4, SELM, FOXA1	1253	10	11126	3.5518	1	0.934692	83.9774
GOTERM_BP_DIRECT	GO:0040037~negative regulation of fibroblast growth factor receptor signaling pathway	4	0.00198873	0.093292	SPRY1, WNT4, SULF2, FGFRL1	1253	10	11126	3.5518	1	0.934692	83.9774
GOTERM_BP_DIRECT	GO:0045332~phospholipid translocation	4	0.00198873	0.093292	ABCB1A, ABCA1, ABCA4, ATP8B3	1253	10	11126	3.5518	1	0.934692	83.9774
GOTERM_BP_DIRECT	GO:0048333~mesodermal cell differentiation	4	0.00198873	0.093292	ITGB4, ITGA2, HMGA2, KDM6B	1253	10	11126	3.5518	1	0.934692	83.9774
GOTERM_BP_DIRECT	GO:0035413~positive regulation of catenin import into nucleus	4	0.00198873	0.093292	DACT1, SULF2, SFRP2, EGF	1253	10	11126	3.5518	1	0.934692	83.9774
GOTERM_BP_DIRECT	GO:0006750~glutathione biosynthetic process	4	0.00198873	0.093292	GSS, GGT6, GGCT, GGT1	1253	10	11126	3.5518	1	0.934692	83.9774
GOTERM_BP_DIRECT	GO:0035909~aorta morphogenesis	4	0.00198873	0.093292	HES1, CHD7, PDGFRB, TBX1	1253	10	11126	3.5518	1	0.934692	83.9774
GOTERM_BP_DIRECT	GO:0035987~endodermal cell differentiation	6	0.0029831	0.0930778	COL7A1, ITGA4, MMP15, HMGA2, MMP14, COL11A1	1253	22	11126	2.42168	1	0.935435	83.9065
GOTERM_BP_DIRECT	GO:0045909~positive regulation of vasodilation	6	0.0029831	0.0930778	SCPEP1, PTPRM, ADORA2B, NPPC, ALOX12, KDR	1253	22	11126	2.42168	1	0.935435	83.9065
GOTERM_BP_DIRECT	GO:0007200~phospholipase C-activating G-protein coupled receptor signaling pathway	6	0.0029831	0.0930778	C3AR1, EDNRB, GNA15, KISS1R, ANO1, CXCR2	1253	22	11126	2.42168	1	0.935435	83.9065
GOTERM_BP_DIRECT	GO:0032729~positive regulation of interferon-gamma production	6	0.0029831	0.0930778	IL12RB1, FLT3, PDE4B, BCL3, PDE4D, TNFSF9	1253	22	11126	2.42168	1	0.935435	83.9065
GOTERM_BP_DIRECT	GO:0045780~positive regulation of bone resorption	5	0.00248592	0.0966755	PTGER4, ADAM8, CAR2, TRF, SYK	1253	16	11126	2.77484	1	0.940053	85.0592
GOTERM_BP_DIRECT	GO:0021522~spinal cord motor neuron differentiation	5	0.00248592	0.0966755	LMO4, IFT172, DYNC2H1, GBX1, CLN8	1253	16	11126	2.77484	1	0.940053	85.0592
GOTERM_BP_DIRECT	GO:0086091~regulation of heart rate by cardiac conduction	5	0.00248592	0.0966755	ANK2, CACNA1G, SCN4B, KCNQ1, SCN5A	1253	16	11126	2.77484	1	0.940053	85.0592
GOTERM_BP_DIRECT	GO:0021904~dorsal/ventral neural tube patterning	5	0.00248592	0.0966755	SMO, GSC, FOXA2, PAX7, FOXA1	1253	16	11126	2.77484	1	0.940053	85.0592
GOTERM_BP_DIRECT	GO:0030517~negative regulation of axon extension	5	0.00248592	0.0966755	CDK5R1, NRP1, SEMA4F, RTN4R, IFRD1	1253	16	11126	2.77484	1	0.940053	85.0592
UP_SEQ_FEATURE	domain:IQ	8	0.00397747	0.0474096	RASGRF2, RASGRF1, MYH14, NRGN, SCN5A, IQSEC1, RNF32, IQSEC2	1272	31	11563	2.34591	1	0.942179	58.2873
UP_SEQ_FEATURE	active site:Charge relay system	16	0.00795494	0.0468604	LPL, HPN, KLK8, LIPA, ABHD15, ABHD8, ACOT2, ESD, TMPRSS6, TMPRSS4, C1RL, PLA2G7, PRSS42, HTRA3, PRSS23, PRSS12	1272	86	11563	1.69124	1	0.943466	57.8523
UP_SEQ_FEATURE	domain:Collagen-like	5	0.00248592	0.0461592	EMID1, C1QL2, NRGN, SCARA5, COL20A1	1272	13	11563	3.49631	1	0.944236	57.2905
UP_SEQ_FEATURE	domain:Ig-like C1-type	5	0.00248592	0.0461592	H2-K1, H2-Q2, H2-D1, H2-Q7, TAPBP	1272	13	11563	3.49631	1	0.944236	57.2905
UP_SEQ_FEATURE	short sequence motif:Cysteine switch	6	0.0029831	0.0498765	ADAMTS15, ADAMTS1, MMP15, MMP14, ADAM15, MMP24	1272	19	11563	2.87066	1	0.944384	60.1897
GOTERM_BP_DIRECT	GO:0060173~limb development	7	0.00348028	0.099959	WNT3, CHD7, COMP, IFT172, FBXW4, EN1, WNT7A	1253	29	11126	2.14332	1	0.944765	86.0427
GOTERM_BP_DIRECT	GO:0002062~chondrocyte differentiation	7	0.00348028	0.099959	TGFBI, GPLD1, HMGA2, SCX, WNT7A, RUNX3, NFIB	1253	29	11126	2.14332	1	0.944765	86.0427
UP_SEQ_FEATURE	domain:LIM zinc-binding 1	9	0.00447465	0.0511068	ABLIM2, CRIP2, LHX2, LMO4, FHL1, PRICKLE2, TGFB1I1, TRIP6, TES	1272	38	11563	2.15299	1	0.945393	61.1076
UP_SEQ_FEATURE	domain:LIM zinc-binding 2	9	0.00447465	0.0511068	ABLIM2, CRIP2, LHX2, LMO4, FHL1, PRICKLE2, TGFB1I1, TRIP6, TES	1272	38	11563	2.15299	1	0.945393	61.1076
UP_SEQ_FEATURE	region of interest:Head	7	0.00348028	0.0495539	PRPH, DES, KRT80, CGN, KRT7, KRT79, VIM	1272	25	11563	2.54531	1	0.946352	59.9457
UP_SEQ_FEATURE	repeat:LRR 6	17	0.00845212	0.0540053	VASN, PODN, RTN4RL1, LRRC8B, RXFP2, LRRC8D, TLR2, RTN4R, LRIG1, TLR3, LRRC15, SLIT3, PRELP, LINGO1, NOD1, LRRC9, LRFN2	1272	95	11563	1.6267	1	0.948556	63.1916
UP_SEQ_FEATURE	metal ion-binding site:Zinc; catalytic	14	0.00696057	0.0533329	ADAMTS20, ADAMTS15, MMP15, MMP23, MMP14, MMP24, PAPPA, ADAMTS10, CDA, ADAMTS1, ADAM8, ADAMTS2, CAR2, ADAM15	1272	73	11563	1.74337	1	0.949336	62.7177
UP_SEQ_FEATURE	active site:Proton acceptor	72	0.0357972	0.0611459	LDHB, ACVRL1, PTGS2, G6PDX, CNP, LTC4S, AURKB, CAMKK1, CAMKK2, PAK6, GSR, MAP3K9, CDK15, CDK14, SYK, TRPM6, SGK1, SGK2, ALDH5A1, PIM2, CDKL2, CDKL5, PRKCB, MAST3, PRKD1, MAPK4, ACAP1, HIPK2, RIPK3, PDGFRB, MAP3K14, EIF2AK2, NEK5, AOC3, ME1, FRK, ALDOC, STK10, BRSK2, MAPKAPK3, EPHB4, EPHB2, GPD1L, STK32C, VRK2, SBK1, ENO2, DCLK3, DYRK4, DCLK2, BDH1, CPT1C, ITK, FLT1, RNASE4, FLT3, FLT4, MET, MAPK1…	1272	540	11563	1.21205	1	0.959268	67.8849
UP_SEQ_FEATURE	repeat:FG-GAP 5	5	0.00248592	0.0591736	GPLD1, ITGA11, ITGA2, ITGA4, ITGA2B	1272	14	11563	3.24657	1	0.959354	66.6484
UP_SEQ_FEATURE	repeat:FG-GAP 1	5	0.00248592	0.0591736	GPLD1, ITGA11, ITGA2, ITGA4, ITGA2B	1272	14	11563	3.24657	1	0.959354	66.6484
UP_SEQ_FEATURE	nucleotide phosphate-binding region:PAPS	5	0.00248592	0.0591736	SULT4A1, CHST10, CHST8, HS3ST1, CHST3	1272	14	11563	3.24657	1	0.959354	66.6484
UP_SEQ_FEATURE	repeat:FG-GAP 4	5	0.00248592	0.0591736	GPLD1, ITGA11, ITGA2, ITGA4, ITGA2B	1272	14	11563	3.24657	1	0.959354	66.6484
UP_SEQ_FEATURE	repeat:FG-GAP 2	5	0.00248592	0.0591736	GPLD1, ITGA11, ITGA2, ITGA4, ITGA2B	1272	14	11563	3.24657	1	0.959354	66.6484
UP_SEQ_FEATURE	repeat:FG-GAP 7	5	0.00248592	0.0591736	GPLD1, ITGA11, ITGA2, ITGA4, ITGA2B	1272	14	11563	3.24657	1	0.959354	66.6484
UP_SEQ_FEATURE	repeat:FG-GAP 6	5	0.00248592	0.0591736	GPLD1, ITGA11, ITGA2, ITGA4, ITGA2B	1272	14	11563	3.24657	1	0.959354	66.6484
UP_SEQ_FEATURE	repeat:FG-GAP 3	5	0.00248592	0.0591736	GPLD1, ITGA11, ITGA2, ITGA4, ITGA2B	1272	14	11563	3.24657	1	0.959354	66.6484
UP_SEQ_FEATURE	domain:Acyl carrier	3	0.00149155	0.0622769	ALDH1L1, ALDH1L2, AASDH	1272	4	11563	6.81781	1	0.959543	68.5742
UP_SEQ_FEATURE	site:Not glycosylated	3	0.00149155	0.0622769	ICAM1, PTGS2, CD24A	1272	4	11563	6.81781	1	0.959543	68.5742
UP_SEQ_FEATURE	domain:TSP type-1 1	6	0.0029831	0.0607029	UNC5A, ADAMTS20, ADAMTS15, ADAMTS10, ADAMTS1, ADAMTS2	1272	20	11563	2.72712	1	0.960505	67.611
UP_SEQ_FEATURE	domain:TSP type-1 2	6	0.0029831	0.0607029	UNC5A, ADAMTS20, ADAMTS15, ADAMTS10, ADAMTS1, ADAMTS2	1272	20	11563	2.72712	1	0.960505	67.611
UP_SEQ_FEATURE	domain:EGF-like 7; calcium-binding	6	0.0029831	0.0607029	FBLN1, NOTCH1, SCUBE3, CELSR2, FBN2, EGF	1272	20	11563	2.72712	1	0.960505	67.611
UP_SEQ_FEATURE	region of interest:Tail	7	0.00348028	0.0687026	PRPH, DES, KRT80, CGN, KRT7, KRT79, VIM	1272	27	11563	2.35677	1	0.966002	72.2331
UP_SEQ_FEATURE	repeat:LRR 3	22	0.010938	0.0677798	VASN, LRRC3, PODN, RTN4RL1, LRRC8B, RXFP2, LRRC8D, TLR2, RTN4R, TLR3, LRIG1, NLRX1, LRRC15, SLIT3, PRELP, ELFN1, ELFN2, LINGO1, NOD1, LGI2, LRRC9, LRFN2	1272	136	11563	1.47051	1	0.96623	71.7336
UP_SEQ_FEATURE	region of interest:Alpha-3	4	0.00198873	0.0670544	H2-K1, H2-Q2, H2-D1, H2-Q7	1272	9	11563	4.04018	1	0.966812	71.335
UP_SEQ_FEATURE	domain:TSP N-terminal	4	0.00198873	0.0670544	COL16A1, COL11A1, COL20A1, COL5A1	1272	9	11563	4.04018	1	0.966812	71.335
UP_SEQ_FEATURE	short sequence motif:WSXWS motif	6	0.0029831	0.0727517	IL12RB1, OSMR, LEPR, CNTFR, IL3RA, IL6RA	1272	21	11563	2.59726	1	0.970765	74.3279
UP_SEQ_FEATURE	domain:Protein kinase	55	0.0273451	0.0789653	ACVRL1, AURKB, CAMKK1, CAMKK2, PAK6, MAP3K9, MLKL, CDK15, CDK14, SYK, SGK1, SGK2, PIM2, CDKL2, CDKL5, PRKCB, MAST3, PRKD1, MAPK4, ACAP1, HIPK2, RIPK3, PDGFRB, MAP3K14, EIF2AK2, NEK5, FRK, STK10, MAPKAPK3, BRSK2, TRIB3, EPHB4, EPHB2, STK32C, EPHB6, VRK2, SBK1, DCLK3, DYRK4, DCLK2, ITK, FLT1, FLT3, FLT4, MET, MAPK11, NPR2, EPHA1, KDR, MAPK13, ULK2, TNK1, MERTK, CDK20, SRMS	1272	406	11563	1.23146	1	0.977351	77.2545
UP_SEQ_FEATURE	repeat:LRR 1	23	0.0114352	0.0822719	VASN, LRRC3, PODN, RTN4RL1, LRRC8B, RXFP2, LRRC8D, TLR2, RTN4R, TLR3, LRIG1, NLRX1, LRRC15, SLIT3, PRELP, ELFN1, ELFN2, LINGO1, NOD1, LGI2, LRRC9, LRRC61, LRFN2	1272	147	11563	1.42231	1	0.979623	78.6805
UP_SEQ_FEATURE	repeat:LRR 2	23	0.0114352	0.0822719	VASN, LRRC3, PODN, RTN4RL1, LRRC8B, RXFP2, LRRC8D, TLR2, RTN4R, TLR3, LRIG1, NLRX1, LRRC15, SLIT3, PRELP, ELFN1, ELFN2, LINGO1, NOD1, LGI2, LRRC9, LRRC61, LRFN2	1272	147	11563	1.42231	1	0.979623	78.6805
UP_SEQ_FEATURE	domain:MARVEL	6	0.0029831	0.0860029	SYP, MAL2, MARVELD1, MAL, SYNGR3, CMTM5	1272	22	11563	2.4792	1	0.981997	80.1881
UP_SEQ_FEATURE	site:Stutter	4	0.00198873	0.0882044	DES, KRT80, KRT7, KRT79	1272	10	11563	3.63616	1	0.982825	81.0298
UP_SEQ_FEATURE	repeat:LRR 20	4	0.00198873	0.0882044	PODN, TLR3, LRRC9, SLIT3	1272	10	11563	3.63616	1	0.982825	81.0298
UP_SEQ_FEATURE	region of interest:Alpha-1	4	0.00198873	0.0882044	H2-K1, H2-Q2, H2-D1, H2-Q7	1272	10	11563	3.63616	1	0.982825	81.0298
UP_SEQ_FEATURE	domain:Ig-like C2-type 7	4	0.00198873	0.0882044	FLT1, ICAM5, FLT4, KDR	1272	10	11563	3.63616	1	0.982825	81.0298
UP_SEQ_FEATURE	region of interest:Alpha-2	4	0.00198873	0.0882044	H2-K1, H2-Q2, H2-D1, H2-Q7	1272	10	11563	3.63616	1	0.982825	81.0298
UP_SEQ_FEATURE	repeat:LRR 22	3	0.00149155	0.0963494	TLR3, LRRC9, SLIT3	1272	5	11563	5.45425	1	0.987656	83.8594
UP_SEQ_FEATURE	site:Cleavage; by PS1	3	0.00149155	0.0963494	CREB3L1, CREB3L4, CREB3L3	1272	5	11563	5.45425	1	0.987656	83.8594
