# Supplementary material for: BAP1/ASXL complex modulation regulates epithelial-mesenchymal transition during trophoblast differentiation and invasion
Source: eLife. 2021 Jun 25;10:e63254. doi: 10.7554/eLife.63254 (PMC8233037; doi:10.7554/eLife.63254)
Supplement: Supplementary file 5. [file elife-63254-supp5.xlsx]

## Sheet: Genes_down KO_up SAM
279 common genes between "down in KO" and "up in SAM":
Spec
Fem1b
Atn1
Kdm5a
Pip4k2c
Rnpep
Dctn1
Brpf1
Wnk1
C77080
Mtmr14
Prkar2a
Cd9
Rybp
Arl6ip5
Akap1
Fuca1
Celsr3
Iqgap3
Lss
9430020K01Rik
Sgcb
Frs2
Flnc
4932438A13Rik
Lrba
Itga7
Ifi30
Tprn
Wdr81
Grn
Slc29a3
Os9
Itpripl1
Wnk2
Ass1
Pink1
4930534B04Rik
Ube2q2
Gm5424
Rps6ka3
Atg2a
AW555464
Pafah2
Rdh11
Tmcc3
Rab11fip1
AU018091
Vps13c
Hsdl2
Slc24a6
Gpd1l
Sdc4
Cnn2
Edem2
Prr13
Slc2a1
Dstyk
Ankrd26
Gm2a
Helb
Acvr1b
Mtmr1
Hmgcl
Rassf8
Hmg20b
Bbx
Kdm1b
Exoc6b
Synj1
Eif2ak3
Plekho2
Tmed8
Errfi1
Zyx
Fam83h
Rpia
Ldlrap1
Lactb
Pdp2
Hebp1
Il17ra
Pcbp3
Procr
Heatr7a
Zc3hav1
Amot
Fig4
Stk10
Cilp2
Tdrd7
Lphn2
Cdc42bpg
Npdc1
Adssl1
Daglb
Phldb2
Neurl1b
Baz1a
Efna1
Stat2
Cadm4
Abhd4
Trim62
Sema6b
Naga
Efs
Efhd2
Dusp16
Lipg
Ccpg1
Ppp1r13l
Bcor
Slc39a4
BC018242
Kif13b
Tmc8
Myo6
Dopey2
Usp28
Gm20510
Lmo7
Fstl3
B230312A22Rik
Itga6
Rab11fip5
Dnaja4
Serinc2
Fn3krp
Slc41a3
Cd82
Kcnk6
Hspb8
Krt18
Blvrb
Gyltl1b
Pltp
Rhox6
Plcxd2
Gadd45b
Aqp3
Lcp1
Sowahb
Ttc26
Hmcn2
Irf6
Arhgap9
Pld2
Vash2
2610019F03Rik
BC031353
Paqr5
Thbd
Npr2
Siae
Agphd1
Lgals3
Sct
B4galnt3
Mbp
Tcp11l2
Crip1
Meis3
Ppp1r13b
Acss2
Ctsh
Fam160a1
Cdcp1
Thnsl2
Pdgfra
Unc13d
Gpr157
Angel1
Zbtb42
Arl6
Pnpo
Rhpn1
Sbsn
Ypel2
2310030G06Rik
Mfsd12
Plekha6
Liph
Mlkl
Arhgap8
Eif4e3
2310028H24Rik
Tgm2
Vax2
Vdr
Arl4c
Plbd1
Hoxd13
Rab3d
H2-D1
Foxj2
Krt8
1200009I06Rik
Lamc2
Ppp4r4
Gpr126
4930455F23Rik
Tjp3
Ankrd33b
Krt7
Hoxb13
Dnajc12
Prom2
Pex11a
Epn3
Psd4
Sema4f
Mitf
Cmtm5
Hcn2
Nrk
Aim1
Tle2
Oas3
Tgm1
Kif5a
Osgin1
Wfdc2
Phactr1
Osmr
Plekhg6
Gata2
Shroom1
Rgl3
Rab8b
Sema7a
Chdh
Prkch
Il2rb
Kif9
Rasa4
Zfp36l3
D330028D13Rik
Tns4
Myh14
Dsp
Serpinb9b
1600025M17Rik
Pdk2
3830417A13Rik
Aph1c
Pparg
Dnase1l3
Cdh5
Trim54
Acvrl1
Mgll
Lrrc8e
Mid2
Ripply3
Parp14
Cldn7
Phka1
Tacstd2
Csf1r
E130309D14Rik
Crebl2
Prss12
Lepr
Slc2a5
Aldh3b2
Arhgef6
Tmem62
Il17re
Nrn1
Igf2bp3
B3gnt3
Ctsr
A430105I19Rik
Serpinb9f
Bzrap1
Serpinb9d
Rhox12
Ctsj

## Sheet: DAVID_down KO_up SAM
Category	Term	Count	%	PValue	Genes	List Total	Pop Hits	Pop Total	Fold Enrichment	Bonferroni	Benjamini	FDR
UP_KEYWORDS	Phosphoprotein	139	53.4615	3.16096e-11	ERRFI1, SCT, KDM1B, NRK, ATN1, CELSR3, AMOT, TGM1, CDH5, RPS6KA3, STK10, LGALS3, HELB, PPP4R4, KIF5A, HMCN2, LEPR, BBX, PIP4K2C, TNS4, PDK2, PDGFRA, TLE2, PRKCH, ANGEL1, VASH2, KRT8, KRT7, FRS2, MITF, PHKA1, UNC13D, MID2, DOPEY2, CLDN7, PHLDB2, H2-D1, MTMR1, CSF1R, NPR2, CREBL2, ZC3HAV1, GATA2, 4932438A13RIK, PLD2, FAM83H, CNN2, RAB11FIP1, 9430020K01RIK, PRKAR2A, MYO6, PNPO, RHPN1, MYH14, MBP, RA…	259	7617	22680	1.59799	7.61791e-09	7.61792e-09	7.39665e-09
GOTERM_CC_DIRECT	GO:0005737~cytoplasm	114	43.8462	1.42374e-05	ERRFI1, NRK, ATN1, IFI30, AQP3, LACTB, RPS6KA3, STK10, LGALS3, HELB, BZRAP1, PPP4R4, KIF5A, ARL6IP5, BBX, PIP4K2C, TNS4, PDK2, TGM2, PDGFRA, PRKCH, VASH2, KRT8, KRT7, FRS2, THNSL2, UNC13D, MID2, PHLDB2, MTMR1, ARL6, ZC3HAV1, ZFP36L3, IQGAP3, FAM83H, RAB11FIP1, PCBP3, PRKAR2A, MYO6, PNPO, MYH14, MBP, RAB11FIP5, MLKL, GADD45B, EIF2AK3, TDRD7, PARP14, PAFAH2, SYNJ1, WNK1, WNK2, GM5424, KDM5A, EIF4E3…	242	6631	19662	1.39681	0.00389347	0.00390105	0.00380138
UP_KEYWORDS	Lipid degradation	9	3.46154	1.89911e-05	ABHD4, LIPH, LIPG, PLBD1, DAGLB, PLCXD2, PAFAH2, MGLL, PLD2	259	100	22680	7.88108	0.00456645	0.00228843	0.00222196
UP_KEYWORDS	Methylation	27	10.3846	4.10811e-05	SEMA7A, PPP1R13B, MTMR14, RAB3D, HSPB8, ATN1, GATA2, CRIP1, C77080, ALDH3B2, PPP1R13L, HMCN2, MBP, FLNC, RAB8B, SEMA6B, DSP, VPS13C, KRT8, KRT7, RPIA, KRT18, SYNJ1, DNAJA4, WNK2, ZYX, HCN2	259	960	22680	2.46284	0.00985191	0.00330018	0.00320433
GOTERM_CC_DIRECT	GO:0070062~extracellular exosome	56	21.5385	6.3484e-05	CD82, RAB3D, SLC2A1, SLC2A5, WFDC2, TGM1, HEBP1, STK10, LGALS3, GM2A, RNPEP, ARL6IP5, CTSH, PIP4K2C, SLC39A4, RAB8B, TGM2, DSP, PRKCH, VPS13C, KRT8, TMC8, KRT7, MID2, EPN3, DOPEY2, PROCR, BLVRB, LCP1, IRF6, 2310030G06RIK, H2-D1, GRN, SDC4, ARL6, TACSTD2, ACVR1B, SBSN, CNN2, PCBP3, PRKAR2A, MYO6, PNPO, MYH14, CILP2, SIAE, PROM2, CADM4, FUCA1, NAGA, ASS1, EFNA1, KRT18, CD9, GPD1L, SERINC2	242	2674	19662	1.70153	0.0172447	0.00869731	0.00847512
GOTERM_CC_DIRECT	GO:0016020~membrane	115	44.2308	0.000112334	ERRFI1, CD82, RAB3D, AQP3, CELSR3, TGM1, CDH5, STK10, LGALS3, LIPH, KIF5A, ARL6IP5, LEPR, PIP4K2C, SLC39A4, TGM2, SEMA6B, PDGFRA, PRKCH, PAQR5, FRS2, PHKA1, MFSD12, UNC13D, PROCR, CLDN7, PHLDB2, H2-D1, MTMR1, CSF1R, SEMA7A, NRN1, SDC4, ARL6, PEX11A, NPR2, SLC41A3, TACSTD2, ZFP36L3, 4932438A13RIK, PLD2, CNN2, APH1C, ITPRIPL1, RAB11FIP1, RDH11, PRKAR2A, MYO6, MYH14, MBP, B4GALNT3, RAB11FIP5, PROM2,…	242	6998	19662	1.33517	0.0303124	0.0102599	0.00999775
UP_KEYWORDS	Lysosome	12	4.61538	0.000141212	GM2A, FUCA1, LRBA, CTSJ, NAGA, PLBD1, CTSH, IFI30, SIAE, UNC13D, SLC29A3, CTSR	259	249	22680	4.22012	0.0334618	0.00850801	0.00826089
GOTERM_MF_DIRECT	GO:0004438~phosphatidylinositol-3-phosphatase activity	4	1.53846	0.000176871	FIG4, MTMR1, SYNJ1, MTMR14	230	9	17446	33.7121	0.0725846	0.075347	0.075347
UP_KEYWORDS	Cytoplasm	75	28.8462	0.000199675	ERRFI1, PPP1R13B, MTMR14, HSPB8, ATN1, HEBP1, RPS6KA3, LGALS3, BZRAP1, DSTYK, HELB, PPP1R13L, UBE2Q2, SGCB, PPP4R4, KIF5A, ARL6IP5, PHACTR1, PIP4K2C, LDLRAP1, TNS4, DSP, TRIM62, PRKCH, PLEKHG6, KRT8, IL17RE, SHROOM1, MID2, UNC13D, EPN3, ARL4C, KIF9, RASA4, OAS3, ADSSL1, BLVRB, PPARG, LCP1, IRF6, TRIM54, PHLDB2, MGLL, MTMR1, ACSS2, DCTN1, ARL6, ZBTB42, ZC3HAV1, ZFP36L3, FAM83H, NEURL1B, PCBP3, PRK…	259	4404	22680	1.49127	0.0469867	0.00962432	0.00934478
GOTERM_CC_DIRECT	GO:0005764~lysosome	14	5.38462	0.000235934	LRBA, FUCA1, NAGA, ZC3HAV1, IFI30, UNC13D, ASS1, CTSR, GM2A, CTSJ, PLBD1, CTSH, SIAE, SLC29A3	242	331	19662	3.43647	0.0626079	0.0161615	0.0157486
GOTERM_BP_DIRECT	GO:0016042~lipid catabolic process	8	3.07692	0.000463341	ABHD4, LIPH, LIPG, PLBD1, DAGLB, PAFAH2, MGLL, PLD2	229	109	18082	5.79528	0.43476	0.345368	0.345087
INTERPRO	IPR011009:Protein kinase-like domain	18	6.92308	0.000479906	ACVRL1, PDGFRA, CSF1R, PRKCH, MLKL, NRK, NPR2, CDC42BPG, EIF2AK3, FN3KRP, ACVR1B, STK10, RPS6KA3, PINK1, DSTYK, WDR81, WNK1, WNK2	251	556	20594	2.65622	0.236813	0.142557	0.14205
UP_KEYWORDS	Kinase	20	7.69231	0.000502525	ACVRL1, PDGFRA, CSF1R, PRKCH, NRK, CDC42BPG, EIF2AK3, FN3KRP, PHKA1, ACVR1B, DUSP16, STK10, RPS6KA3, PINK1, DSTYK, WNK1, PRKAR2A, WNK2, PIP4K2C, PDK2	259	707	22680	2.47716	0.114089	0.0201848	0.0195985
INTERPRO	IPR011993:Pleckstrin homology-like domain	15	5.76923	0.000506419	ARHGAP9, MTMR1, LRBA, CDC42BPG, PLEKHG6, PLEKHA6, FRS2, PLD2, RASA4, PSD4, PLEKHO2, LDLRAP1, TNS4, PHLDB2, ARHGEF6	251	409	20594	3.00909	0.248125	0.142557	0.14205
GOTERM_BP_DIRECT	GO:0006629~lipid metabolic process	16	6.15385	0.000754472	MTMR1, ABHD4, PLCXD2, LSS, PAFAH2, 4932438A13RIK, PLD2, HMGCL, GM2A, LIPH, LIPG, PLBD1, LDLRAP1, DAGLB, PLTP, MGLL	229	459	18082	2.75244	0.605093	0.345368	0.345087
GOTERM_CC_DIRECT	GO:0005911~cell-cell junction	10	3.84615	0.000856778	DSP, CDH5, PRKCH, 9430020K01RIK, KRT8, SLC2A1, FRS2, IQGAP3, AQP3, ARHGEF6	242	201	19662	4.04219	0.209317	0.0469514	0.0457519
GOTERM_BP_DIRECT	GO:0006468~protein phosphorylation	18	6.92308	0.0010542	ACVRL1, PDGFRA, CSF1R, PRKCH, MLKL, NRK, NPR2, CDC42BPG, EIF2AK3, PHKA1, ACVR1B, STK10, RPS6KA3, PINK1, DSTYK, WNK1, WNK2, PDK2	229	576	18082	2.46752	0.727033	0.345368	0.345087
UP_KEYWORDS	Glycoprotein	64	24.6154	0.00110937	ACVRL1, CD82, MTMR14, SLC2A1, LAMC2, SLC2A5, IFI30, AQP3, CELSR3, CTSR, CDH5, THBD, GM2A, SGCB, LIPH, CTSJ, LIPG, LEPR, HMCN2, CTSH, SLC39A4, SEMA6B, PDGFRA, KRT8, TMC8, IL17RE, OSMR, PRSS12, IL17RA, PROCR, CDCP1, B3GNT3, ITGA7, PLBD1, ITGA6, PPARG, SLC29A3, H2-D1, CSF1R, SEMA7A, GRN, NRN1, SDC4, NPR2, TACSTD2, ACVR1B, FSTL3, OS9, CILP2, SIAE, PLTP, LRRC8E, PROM2, CADM4, FUCA1, EIF2AK3, NAGA, TME…	259	3815	22680	1.46902	0.234715	0.0381941	0.0370848
GOTERM_BP_DIRECT	GO:0030335~positive regulation of cell migration	10	3.84615	0.00112223	FAM83H, SEMA6B, CSF1R, PDGFRA, SEMA7A, CTSH, ITGA6, SEMA4F, LAMC2, PLD2	229	203	18082	3.88969	0.748986	0.345368	0.345087
GOTERM_CC_DIRECT	GO:0005925~focal adhesion	14	5.38462	0.00112804	TLE2, SDC4, LMO7, CNN2, PROCR, PRKAR2A, ZYX, CD9, ITGA6, LCP1, FLNC, TNS4, PHLDB2, TGM2	242	391	19662	2.90913	0.266007	0.0515136	0.0501976
GOTERM_MF_DIRECT	GO:0016301~kinase activity	20	7.69231	0.00148486	ACVRL1, PDGFRA, CSF1R, PRKCH, NRK, CDC42BPG, EIF2AK3, FN3KRP, PHKA1, ACVR1B, DUSP16, STK10, RPS6KA3, PINK1, DSTYK, WNK1, PRKAR2A, WNK2, PIP4K2C, PDK2	230	674	17446	2.25081	0.469014	0.316275	0.316275
UP_KEYWORDS	Nucleotide-binding	35	13.4615	0.00159661	ACVRL1, CSF1R, ACSS2, ARL6, NRK, RAB3D, NPR2, ACVR1B, STK10, RPS6KA3, DSTYK, HELB, UBE2Q2, PRKAR2A, MYO6, KIF5A, KIF13B, MYH14, PIP4K2C, PDK2, RAB8B, PDGFRA, PRKCH, MLKL, CDC42BPG, EIF2AK3, ASS1, ARL4C, KIF9, PINK1, WNK1, OAS3, WNK2, ADSSL1, HCN2	259	1754	22680	1.74736	0.319611	0.0480979	0.0467009
INTERPRO	IPR000719:Protein kinase, catalytic domain	16	6.15385	0.00164398	ACVRL1, PDGFRA, CSF1R, PRKCH, MLKL, NRK, NPR2, CDC42BPG, EIF2AK3, ACVR1B, STK10, RPS6KA3, PINK1, DSTYK, WNK1, WNK2	251	515	20594	2.54906	0.603993	0.293889	0.292844
GOTERM_CC_DIRECT	GO:0005913~cell-cell adherens junction	12	4.61538	0.0018725	TGM1, CNN2, CADM4, KRT18, PPP1R13L, MYO6, EFHD2, ZYX, ITGA6, LMO7, ZC3HAV1, PHLDB2	242	316	19662	3.08536	0.40163	0.0732949	0.0714224
GOTERM_BP_DIRECT	GO:1902041~regulation of extrinsic apoptotic signaling pathway via death domain receptors	3	1.15385	0.00229651	LGALS3, FEM1B, TMC8	229	6	18082	39.4803	0.941002	0.5654	0.564941
INTERPRO	IPR001715:Calponin homology domain	6	2.30769	0.00232179	CNN2, LMO7, LCP1, FLNC, IQGAP3, ARHGEF6	251	76	20594	6.47746	0.729825	0.293889	0.292844
INTERPRO	IPR008271:Serine/threonine-protein kinase, active site	12	4.61538	0.00261002	ACVRL1, STK10, RPS6KA3, PINK1, DSTYK, PRKCH, WNK1, NRK, WNK2, CDC42BPG, EIF2AK3, ACVR1B	251	333	20594	2.95668	0.770388	0.293889	0.292844
SMART	SM00033:CH	6	2.30769	0.00262112	CNN2, LMO7, LCP1, FLNC, IQGAP3, ARHGEF6	152	66	10425	6.23505	0.309309	0.369578	0.369578
UP_KEYWORDS	Lipid metabolism	13	5	0.00314901	MTMR1, ABHD4, PLCXD2, LSS, PAFAH2, PLD2, GM2A, LIPH, LIPG, PLBD1, LDLRAP1, DAGLB, MGLL	259	417	22680	2.72992	0.532384	0.0812802	0.0789193
GOTERM_BP_DIRECT	GO:0060527~prostate epithelial cord arborization involved in prostate glandular acinus morphogenesis	3	1.15385	0.00318843	FRS2, HOXD13, HOXB13	229	7	18082	33.8403	0.98038	0.652004	0.651474
UP_KEYWORDS	Coiled coil	52	20	0.00337262	PPP1R13B, ANKRD33B, NRK, LAMC2, AMOT, STK10, BZRAP1, DSTYK, PPP4R4, PSD4, KIF5A, EFHD2, HMG20B, PHACTR1, DSP, TRIM62, TLE2, KRT8, KRT7, LMO7, MITF, BAZ1A, MID2, KIF9, PLEKHO2, TRIM54, PHLDB2, ARHGEF6, MTMR1, DCTN1, NPR2, SBSN, ITPRIPL1, OS9, MYO6, MYH14, PROM2, RAB11FIP5, ANKRD26, A430105I19RIK, MLKL, CDC42BPG, EXOC6B, PLEKHA6, USP28, PARP14, FAM160A1, KRT18, WNK1, CCPG1, WNK2, TMCC3	259	3076	22680	1.48034	0.556996	0.0812802	0.0789193
GOTERM_BP_DIRECT	GO:0046488~phosphatidylinositol metabolic process	4	1.53846	0.00370758	FIG4, CSF1R, SYNJ1, PIP4K2C	229	25	18082	12.6337	0.989668	0.652004	0.651474
UP_SEQ_FEATURE	compositionally biased region:Ser-rich	13	5	0.00449402	DCTN1, MTMR14, KRT8, 4932438A13RIK, C77080, CDH5, NEURL1B, RYBP, TCP11L2, TNS4, PHLDB2, PRR13, RAB11FIP5	231	390	18012	2.59913	0.962504	1	1
GOTERM_MF_DIRECT	GO:0004672~protein kinase activity	16	6.15385	0.00451823	ACVRL1, PDGFRA, CSF1R, PRKCH, MLKL, NRK, NPR2, CDC42BPG, EIF2AK3, ACVR1B, STK10, RPS6KA3, PINK1, DSTYK, WNK1, WNK2	230	531	17446	2.28556	0.854725	0.641588	0.641588
GOTERM_BP_DIRECT	GO:0016310~phosphorylation	17	6.53846	0.00485518	ACVRL1, PDGFRA, CSF1R, PRKCH, NRK, CDC42BPG, EIF2AK3, FN3KRP, ACVR1B, STK10, RPS6KA3, PINK1, DSTYK, WNK1, WNK2, PIP4K2C, PDK2	229	612	18082	2.19335	0.9975	0.747091	0.746484
GOTERM_CC_DIRECT	GO:0009986~cell surface	17	6.53846	0.00486676	ACVRL1, PDGFRA, CSF1R, SDC4, ACVR1B, THBD, CDH5, PROCR, LGALS3, IL2RB, LIPG, CD9, ITGA7, ITGA6, TJP3, H2-D1, PROM2	242	629	19662	2.19589	0.737301	0.164735	0.160527
INTERPRO	IPR001849:Pleckstrin homology domain	10	3.84615	0.00487793	ARHGAP9, RASA4, PSD4, CDC42BPG, PLEKHG6, PLEKHA6, PLEKHO2, PHLDB2, PLD2, ARHGEF6	251	262	20594	3.1316	0.936263	0.401751	0.400324
INTERPRO	IPR000240:Serpin B9/maspin	3	1.15385	0.00499513	SERPINB9D, SERPINB9F, SERPINB9B	251	9	20594	27.3493	0.940353	0.401751	0.400324
UP_SEQ_FEATURE	domain:Protein kinase	15	5.76923	0.00532202	ACVRL1, PDGFRA, CSF1R, PRKCH, MLKL, NRK, NPR2, CDC42BPG, EIF2AK3, ACVR1B, STK10, PINK1, DSTYK, WNK1, WNK2	231	502	18012	2.3299	0.979557	1	1
UP_SEQ_FEATURE	domain:PH	9	3.46154	0.00538221	RASA4, PSD4, CDC42BPG, PLEKHG6, PLEKHA6, PLEKHO2, PHLDB2, PLD2, ARHGEF6	231	208	18012	3.37388	0.980439	1	1
KEGG_PATHWAY	mmu04144:Endocytosis	10	3.84615	0.00586689	EPN3, PDGFRA, RAB11FIP1, PSD4, IL2RB, KIF5A, LDLRAP1, H2-D1, PLD2, RAB11FIP5	99	261	7691	2.97651	0.566365	0.833098	0.833098
GOTERM_CC_DIRECT	GO:0009897~external side of plasma membrane	11	4.23077	0.00597303	CDH5, PDGFRA, LGALS3, SEMA7A, IL2RB, RNPEP, CD9, ITGA6, OSMR, H2-D1, AMOT	242	317	19662	2.81933	0.806314	0.164735	0.160527
GOTERM_CC_DIRECT	GO:0005887~integral component of plasma membrane	25	9.61538	0.00601224	ACVRL1, KCNK6, CD82, NPR2, SLC2A1, TACSTD2, ACVR1B, SLC2A5, AQP3, THBD, APH1C, SGCB, AU018091, LEPR, LRRC8E, SLC39A4, PROM2, SEMA6B, PDGFRA, CADM4, IL17RE, OSMR, IL17RA, CD9, HCN2	242	1126	19662	1.80391	0.808396	0.164735	0.160527
INTERPRO	IPR003096:Smooth muscle protein/calponin	3	1.15385	0.00619412	CNN2, LMO7, ARHGEF6	251	10	20594	24.6143	0.969746	0.435911	0.434363
UP_KEYWORDS	Serine/threonine-protein kinase	12	4.61538	0.00689198	ACVRL1, STK10, RPS6KA3, PINK1, DSTYK, PRKCH, WNK1, NRK, WNK2, CDC42BPG, EIF2AK3, ACVR1B	259	405	22680	2.59459	0.811134	0.138967	0.134931
UP_KEYWORDS	ATP-binding	27	10.3846	0.00691954	ACVRL1, CSF1R, ACSS2, NRK, ACVR1B, STK10, RPS6KA3, DSTYK, HELB, UBE2Q2, MYO6, KIF5A, KIF13B, MYH14, PIP4K2C, PDK2, PDGFRA, PRKCH, MLKL, CDC42BPG, EIF2AK3, ASS1, KIF9, PINK1, WNK1, OAS3, WNK2	259	1363	22680	1.73465	0.812393	0.138967	0.134931
GOTERM_BP_DIRECT	GO:0046777~protein autophosphorylation	8	3.07692	0.0086506	CSF1R, PDGFRA, STK10, WNK1, WNK2, EIF2AK3, PHKA1, ACVR1B	229	183	18082	3.45183	0.999977	1	1
GOTERM_MF_DIRECT	GO:0048185~activin binding	3	1.15385	0.00872677	ACVRL1, ACVR1B, FSTL3	230	11	17446	20.687	0.976101	0.929401	0.929401
GOTERM_CC_DIRECT	GO:0005811~lipid particle	5	1.92308	0.00876371	ALDH3B2, ABHD4, ATG2A, LSS, AKAP1	242	66	19662	6.15515	0.91035	0.218296	0.212719
UP_SEQ_FEATURE	active site:Proton acceptor	18	6.92308	0.00987284	ACVRL1, PDGFRA, CSF1R, HSDL2, PRKCH, NRK, CDC42BPG, EIF2AK3, ACVR1B, LSS, STK10, RPS6KA3, PINK1, DSTYK, RDH11, WNK1, WNK2, GPD1L	231	710	18012	1.97681	0.999278	1	1
GOTERM_MF_DIRECT	GO:0004674~protein serine/threonine kinase activity	13	5	0.0111644	ACVRL1, PRKCH, NRK, CDC42BPG, EIF2AK3, ACVR1B, STK10, RPS6KA3, PINK1, DSTYK, WNK1, WNK2, PDK2	230	428	17446	2.30392	0.991627	0.95121	0.95121
SMART	SM00233:PH	10	3.84615	0.0112715	ARHGAP9, RASA4, PSD4, CDC42BPG, PLEKHG6, PLEKHA6, PLEKHO2, PHLDB2, PLD2, ARHGEF6	152	253	10425	2.71089	0.797761	0.794639	0.794639
GOTERM_CC_DIRECT	GO:0016323~basolateral plasma membrane	8	3.07692	0.0126621	DSP, DSTYK, CLDN7, SLC2A1, LEPR, ITGA6, AQP3, PROM2	242	203	19662	3.20189	0.969547	0.289118	0.281732
INTERPRO	IPR025661:Cysteine peptidase, asparagine active site	3	1.15385	0.0138875	CTSJ, CTSH, CTSR	251	15	20594	16.4096	0.999619	0.84983	0.846811
GOTERM_CC_DIRECT	GO:0005902~microvillus	5	1.92308	0.0141958	PDGFRA, MYO6, PLEKHG6, KIF13B, PROM2	242	76	19662	5.34526	0.98011	0.296923	0.289337
GOTERM_CC_DIRECT	GO:0042383~sarcolemma	6	2.30769	0.0151712	SGCB, KRT8, ITGA7, FLNC, SLC2A5, PLD2	242	118	19662	4.13125	0.984835	0.296923	0.289337
GOTERM_BP_DIRECT	GO:0045104~intermediate filament cytoskeleton organization	3	1.15385	0.0169095	DSP, FAM83H, KRT18	229	16	18082	14.8051	1	1	1
GOTERM_MF_DIRECT	GO:0005515~protein binding	69	26.5385	0.0169632	ACVRL1, KDM5A, TTC26, RAB3D, HSPB8, SLC2A1, ATN1, LAMC2, DUSP16, AMOT, CDH5, LGALS3, PPP1R13L, PPP4R4, KIF5A, LEPR, EFHD2, ARL6IP5, LDLRAP1, RAB8B, DSP, PRKCH, KRT8, KRT7, FRS2, BAZ1A, UNC13D, RIPPLY3, CLDN7, ADSSL1, ITGA7, ITGA6, PPARG, LCP1, H2-D1, CSF1R, DCTN1, ARL6, SLC41A3, HOXB13, ACVR1B, GATA2, IQGAP3, NEURL1B, OS9, PRKAR2A, MYO6, IGF2BP3, SERPINB9B, ANKRD26, MLKL, GADD45B, VDR, FEM1B, STA…	230	4092	17446	1.27903	0.999317	1	1
UP_KEYWORDS	Signal	67	25.7692	0.0173014	ACVRL1, SCT, MTMR14, LAMC2, IFI30, CELSR3, WFDC2, CTSR, CDH5, THBD, LGALS3, GM2A, LIPH, CTSJ, LIPG, LEPR, HMCN2, CTSH, TNS4, SLC39A4, SEMA6B, PDGFRA, MITF, IL17RE, OSMR, PRSS12, IL17RA, PROCR, CDCP1, CHDH, B3GNT3, ITGA7, PLBD1, ITGA6, DNASE1L3, H2-D1, CSF1R, SEMA7A, GRN, NRN1, SDC4, NPR2, TACSTD2, ACVR1B, SBSN, 4932438A13RIK, FSTL3, ITPRIPL1, OS9, RDH11, CILP2, B4GALNT3, SIAE, PLTP, PROM2, NPDC1,…	259	4543	22680	1.29144	0.985096	0.320742	0.311426
UP_SEQ_FEATURE	binding site:ATP	15	5.76923	0.0181592	ACVRL1, PDGFRA, CSF1R, PRKCH, NRK, CDC42BPG, EIF2AK3, ACVR1B, STK10, RPS6KA3, PINK1, DSTYK, WNK1, WNK2, PDK2	231	583	18012	2.00619	0.999998	1	1
INTERPRO	IPR013201:Proteinase inhibitor I29, cathepsin propeptide	3	1.15385	0.0219093	CTSJ, CTSH, CTSR	251	19	20594	12.9549	0.999996	0.84983	0.846811
GOTERM_MF_DIRECT	GO:0052689~carboxylic ester hydrolase activity	5	1.92308	0.0219254	ABHD4, LIPH, LIPG, SIAE, MGLL	230	81	17446	4.68223	0.999921	1	1
SMART	SM00220:S_TKc	12	4.61538	0.0221498	ACVRL1, STK10, RPS6KA3, PINK1, DSTYK, PRKCH, WNK1, NRK, WNK2, CDC42BPG, EIF2AK3, ACVR1B	152	380	10425	2.16586	0.957499	1	1
INTERPRO	IPR017441:Protein kinase, ATP binding site	11	4.23077	0.0226498	ACVRL1, CSF1R, PDGFRA, STK10, RPS6KA3, PINK1, DSTYK, PRKCH, NRK, CDC42BPG, ACVR1B	251	394	20594	2.29067	0.999997	0.84983	0.846811
GOTERM_MF_DIRECT	GO:0005524~ATP binding	30	11.5385	0.0238941	ACVRL1, CSF1R, ACSS2, NRK, NPR2, ACVR1B, STK10, RPS6KA3, DSTYK, HELB, UBE2Q2, MYO6, KIF5A, KIF13B, MYH14, PIP4K2C, PDK2, PDGFRA, PRKCH, MLKL, CDC42BPG, EIF2AK3, ASS1, KIF9, PINK1, WNK1, DNAJA4, OAS3, WNK2, GM5424	230	1507	17446	1.51	0.999966	1	1
INTERPRO	IPR001518:Argininosuccinate synthase	2	0.769231	0.0241321	GM5424, ASS1	251	2	20594	82.0478	0.999999	0.84983	0.846811
INTERPRO	IPR023434:Argininosuccinate synthase, type 1 subfamily	2	0.769231	0.0241321	GM5424, ASS1	251	2	20594	82.0478	0.999999	0.84983	0.846811
INTERPRO	IPR024074:Argininosuccinate synthetase, catalytic/multimerisation domain body	2	0.769231	0.0241321	GM5424, ASS1	251	2	20594	82.0478	0.999999	0.84983	0.846811
INTERPRO	IPR018223:Argininosuccinate synthase, conserved site	2	0.769231	0.0241321	GM5424, ASS1	251	2	20594	82.0478	0.999999	0.84983	0.846811
INTERPRO	IPR027231:Semaphorin	3	1.15385	0.0241515	SEMA6B, SEMA7A, SEMA4F	251	20	20594	12.3072	0.999999	0.84983	0.846811
UP_KEYWORDS	Actin-binding	8	3.07692	0.0256948	CNN2, MYO6, MYH14, PHACTR1, LCP1, FLNC, SHROOM1, TNS4	259	252	22680	2.77992	0.998114	0.442318	0.429471
GOTERM_MF_DIRECT	GO:0004055~argininosuccinate synthase activity	2	0.769231	0.0260809	GM5424, ASS1	230	2	17446	75.8522	0.999987	1	1
INTERPRO	IPR025660:Cysteine peptidase, histidine active site	3	1.15385	0.0264832	CTSJ, CTSH, CTSR	251	21	20594	11.7211	1	0.858875	0.855824
GOTERM_CC_DIRECT	GO:0016327~apicolateral plasma membrane	3	1.15385	0.0269569	THBD, CLDN7, KRT8	242	21	19662	11.6068	0.99944	0.483742	0.471384
INTERPRO	IPR001245:Serine-threonine/tyrosine-protein kinase catalytic domain	6	2.30769	0.0274596	ACVRL1, CSF1R, PDGFRA, DSTYK, MLKL, NPR2	251	139	20594	3.54163	1	0.858875	0.855824
GOTERM_MF_DIRECT	GO:0019903~protein phosphatase binding	5	1.92308	0.0286501	CSF1R, CDH5, EIF2AK3, PPARG, AKAP1	230	88	17446	4.30978	0.999996	1	1
GOTERM_CC_DIRECT	GO:0005615~extracellular space	28	10.7692	0.029527	GRN, NRN1, SCT, TACSTD2, LAMC2, CTSR, FSTL3, THBD, LGALS3, SERPINB9D, LIPH, SERPINB9F, CTSJ, LIPG, RNPEP, LEPR, CTSH, SERPINB9B, SIAE, PLTP, TLE2, CMTM5, TMC8, SEMA4F, OAS3, PLBD1, CD9, LCP1	242	1504	19662	1.51259	0.999729	0.483742	0.471384
GOTERM_MF_DIRECT	GO:0051015~actin filament binding	6	2.30769	0.0301841	MYO6, ADSSL1, MYH14, LCP1, FLNC, SHROOM1	230	132	17446	3.44783	0.999998	1	1
SMART	SM00848:SM00848	3	1.15385	0.0303323	CTSJ, CTSH, CTSR	152	19	10425	10.8293	0.987003	1	1
GOTERM_BP_DIRECT	GO:0048260~positive regulation of receptor-mediated endocytosis	3	1.15385	0.0309832	SYNJ1, LDLRAP1, PLD2	229	22	18082	10.7674	1	1	1
GOTERM_BP_DIRECT	GO:0022617~extracellular matrix disassembly	3	1.15385	0.0309832	KIF9, LAMC2, LCP1	229	22	18082	10.7674	1	1	1
GOTERM_MF_DIRECT	GO:0000166~nucleotide binding	36	13.8462	0.031196	ACVRL1, CSF1R, ACSS2, ARL6, NRK, RAB3D, NPR2, ACVR1B, STK10, RPS6KA3, DSTYK, HELB, UBE2Q2, PRKAR2A, MYO6, MYH14, IGF2BP3, PIP4K2C, PDK2, RAB8B, PDGFRA, PRKCH, MLKL, CDC42BPG, EIF2AK3, PARP14, ASS1, ARL4C, KIF9, PINK1, SYNJ1, WNK1, OAS3, WNK2, ADSSL1, HCN2	230	1936	17446	1.41047	0.999999	1	1
GOTERM_CC_DIRECT	GO:0031252~cell leading edge	4	1.53846	0.0313261	DCTN1, CDC42BPG, ATN1, PHLDB2	242	56	19662	5.80342	0.999837	0.483742	0.471384
INTERPRO	IPR000668:Peptidase C1A, papain C-terminal	3	1.15385	0.0314055	CTSJ, CTSH, CTSR	251	23	20594	10.7019	1	0.930596	0.92729
GOTERM_CC_DIRECT	GO:0030054~cell junction	16	6.15385	0.0317787	DSP, NRN1, ATN1, IFI30, AMOT, CDH5, DSTYK, PPP1R13L, 9430020K01RIK, CLDN7, ZYX, HMCN2, PHACTR1, LCP1, TNS4, TJP3	242	718	19662	1.81054	0.999856	0.483742	0.471384
UP_KEYWORDS	SH3 domain	7	2.69231	0.0321256	ARHGAP9, BZRAP1, EFS, PPP1R13B, PPP1R13L, TJP3, ARHGEF6	259	208	22680	2.94699	0.999618	0.49334	0.479011
UP_KEYWORDS	Polymorphism	7	2.69231	0.0327529	ANKRD26, UBE2Q2, CTSJ, ATN1, LEPR, BBX, PARP14	259	209	22680	2.93289	0.999673	0.49334	0.479011
UP_SEQ_FEATURE	signal peptide	52	20	0.0344162	ACVRL1, SCT, LAMC2, CELSR3, WFDC2, CTSR, CDH5, THBD, GM2A, LIPH, CTSJ, LIPG, LEPR, CTSH, TNS4, SLC39A4, SEMA6B, PDGFRA, IL17RE, OSMR, PRSS12, IL17RA, PROCR, CDCP1, ITGA7, PLBD1, ITGA6, DNASE1L3, H2-D1, CSF1R, SEMA7A, GRN, NRN1, SDC4, NPR2, TACSTD2, ACVR1B, SBSN, FSTL3, ITPRIPL1, OS9, SIAE, PLTP, PROM2, NPDC1, CADM4, FUCA1, EIF2AK3, NAGA, SEMA4F, EFNA1, IL2RB	231	3124	18012	1.2979	1	1	1
GOTERM_BP_DIRECT	GO:0032526~response to retinoic acid	4	1.53846	0.0351815	SYNJ1, CTSH, PPARG, AQP3	229	57	18082	5.5411	1	1	1
UP_KEYWORDS	Hydrolase	28	10.7692	0.0353956	MTMR1, ABHD4, MTMR14, PLCXD2, CTSR, PLD2, LACTB, HELB, GM2A, LIPH, CTSJ, LIPG, RNPEP, CTSH, SIAE, FUCA1, EDEM2, NAGA, USP28, PRSS12, PAFAH2, FIG4, PDP2, SYNJ1, PLBD1, DAGLB, DNASE1L3, MGLL	259	1646	22680	1.48961	0.999831	0.501785	0.48721
GOTERM_BP_DIRECT	GO:0000053~argininosuccinate metabolic process	2	0.769231	0.0373547	GM5424, ASS1	229	3	18082	52.6405	1	1	1
UP_SEQ_FEATURE	repeat:ANK 2	7	2.69231	0.0378399	ANKRD26, ANKRD33B, PPP1R13B, SOWAHB, PPP1R13L, FEM1B, BCOR	231	193	18012	2.82807	1	1	1
UP_SEQ_FEATURE	repeat:ANK 1	7	2.69231	0.0378399	ANKRD26, ANKRD33B, PPP1R13B, SOWAHB, PPP1R13L, FEM1B, BCOR	231	193	18012	2.82807	1	1	1
GOTERM_MF_DIRECT	GO:0043812~phosphatidylinositol-4-phosphate phosphatase activity	2	0.769231	0.0388662	FIG4, SYNJ1	230	3	17446	50.5681	1	1	1
GOTERM_MF_DIRECT	GO:0004702~receptor signaling protein serine/threonine kinase activity	4	1.53846	0.0388981	ACVRL1, STK10, NRK, ACVR1B	230	57	17446	5.32296	1	1	1
GOTERM_CC_DIRECT	GO:0030424~axon	10	3.84615	0.0396633	PDGFRA, PINK1, MYO6, KIF5A, KIF13B, MYH14, LDLRAP1, PRSS12, MGLL, HCN2	242	370	19662	2.19589	0.999985	0.571986	0.557374
UP_SEQ_FEATURE	nucleotide phosphate-binding region:ATP	20	7.69231	0.0400234	ACVRL1, PDGFRA, CSF1R, PRKCH, NRK, CDC42BPG, EIF2AK3, ACVR1B, ASS1, STK10, RPS6KA3, KIF9, PINK1, DSTYK, WNK1, WNK2, MYO6, KIF5A, MYH14, PDK2	231	963	18012	1.6194	1	1	1
INTERPRO	IPR013128:Peptidase C1A, papain	3	1.15385	0.0422186	CTSJ, CTSH, CTSR	251	27	20594	9.11642	1	1	0.998221
UP_SEQ_FEATURE	short sequence motif:Box 1 motif	3	1.15385	0.0431582	IL2RB, LEPR, OSMR	231	26	18012	8.997	1	1	1
SMART	SM00645:Pept_C1	3	1.15385	0.0432266	CTSJ, CTSH, CTSR	152	23	10425	8.94594	0.998032	1	1
INTERPRO	IPR005135:Endonuclease/exonuclease/phosphatase	3	1.15385	0.0451102	SYNJ1, ANGEL1, DNASE1L3	251	28	20594	8.79084	1	1	0.998221
GOTERM_BP_DIRECT	GO:0031032~actomyosin structure organization	3	1.15385	0.0451921	CNN2, MYH14, PHACTR1	229	27	18082	8.77341	1	1	1
GOTERM_BP_DIRECT	GO:0019915~lipid storage	3	1.15385	0.0451921	GM2A, ABHD4, 4932438A13RIK	229	27	18082	8.77341	1	1	1
INTERPRO	IPR001452:Src homology-3 domain	7	2.69231	0.0452659	ARHGAP9, BZRAP1, EFS, PPP1R13B, PPP1R13L, TJP3, ARHGEF6	251	212	20594	2.70913	1	1	0.998221
GOTERM_MF_DIRECT	GO:0043236~laminin binding	3	1.15385	0.045351	LGALS3, ITGA7, ITGA6	230	26	17446	8.75217	1	1	1
GOTERM_CC_DIRECT	GO:0048471~perinuclear region of cytoplasm	15	5.76923	0.0467929	PPP1R13B, VDR, MTMR14, ANGEL1, EIF2AK3, ATN1, LAMC2, EPN3, PINK1, PRKAR2A, MYO6, CTSJ, KIF5A, PPARG, RAB8B	242	692	19662	1.76115	0.999998	0.619544	0.603717
INTERPRO	IPR015412:Autophagy-related, C-terminal	2	0.769231	0.0476842	VPS13C, ATG2A	251	4	20594	41.0239	1	1	0.998221
INTERPRO	IPR022067:Homeobox protein Hox1A3 N-terminal	2	0.769231	0.0476842	HOXD13, HOXB13	251	4	20594	41.0239	1	1	0.998221
UP_SEQ_FEATURE	compositionally biased region:Pro-rich	16	6.15385	0.0483198	PPP1R13B, PLEKHA6, C77080, EPN3, BZRAP1, EFS, SYNJ1, UBE2Q2, PPP1R13L, WNK2, 9430020K01RIK, ZYX, RGL3, HCN2, PRR13, TPRN	231	731	18012	1.70668	1	1	1
GOTERM_MF_DIRECT	GO:0008017~microtubule binding	7	2.69231	0.0485732	KIF9, WDR81, DCTN1, KIF5A, TRIM54, MID2, AKAP1	230	200	17446	2.65483	1	1	1
GOTERM_CC_DIRECT	GO:0001725~stress fiber	4	1.53846	0.0491435	CNN2, ZYX, MYH14, LCP1	242	67	19662	4.85062	0.999999	0.619544	0.603717
UP_SEQ_FEATURE	domain:Sema	3	1.15385	0.0493741	SEMA6B, SEMA7A, SEMA4F	231	28	18012	8.35436	1	1	1
GOTERM_BP_DIRECT	GO:0016139~glycoside catabolic process	2	0.769231	0.049495	FUCA1, NAGA	229	4	18082	39.4803	1	1	1
GOTERM_BP_DIRECT	GO:0070164~negative regulation of adiponectin secretion	2	0.769231	0.049495	RAB11FIP1, RAB11FIP5	229	4	18082	39.4803	1	1	1
GOTERM_BP_DIRECT	GO:0060743~epithelial cell maturation involved in prostate gland development	2	0.769231	0.049495	FEM1B, HOXB13	229	4	18082	39.4803	1	1	1
GOTERM_CC_DIRECT	GO:0016324~apical plasma membrane	9	3.46154	0.0497444	DSTYK, SLC2A1, CD9, LMO7, SLC2A5, OSMR, SLC39A4, TJP3, PROM2	242	328	19662	2.22936	0.999999	0.619544	0.603717
UP_SEQ_FEATURE	domain:RBD-FIP	2	0.769231	0.0501111	RAB11FIP1, RAB11FIP5	231	4	18012	38.987	1	1	1
UP_SEQ_FEATURE	region of interest:Necessary for interaction with PNN	2	0.769231	0.0501111	KRT18, KRT8	231	4	18012	38.987	1	1	1
COG_ONTOLOGY	Cytoskeleton	3	1.15385	0.0502957	CNN2, LCP1, IQGAP3	22	37	2126	7.83538	0.403124	0.502957	0.502957
INTERPRO	IPR017892:Protein kinase, C-terminal	3	1.15385	0.0511041	RPS6KA3, PRKCH, CDC42BPG	251	30	20594	8.20478	1	1	0.998221
GOTERM_MF_DIRECT	GO:0016361~activin receptor activity, type I	2	0.769231	0.0514844	ACVRL1, ACVR1B	230	4	17446	37.9261	1	1	1
KEGG_PATHWAY	mmu05412:Arrhythmogenic right ventricular cardiomyopathy (ARVC)	4	1.53846	0.0535311	DSP, SGCB, ITGA7, ITGA6	99	67	7691	4.63802	0.999595	1	1
INTERPRO	IPR001627:Semaphorin/CD100 antigen	3	1.15385	0.0542022	SEMA6B, SEMA7A, SEMA4F	251	31	20594	7.94011	1	1	0.998221
GOTERM_CC_DIRECT	GO:0055037~recycling endosome	5	1.92308	0.0545533	FIG4, RAB11FIP1, LDLRAP1, UNC13D, RAB11FIP5	242	116	19662	3.50207	1	0.620505	0.604653
GOTERM_CC_DIRECT	GO:0005886~plasma membrane	72	27.6923	0.0551092	ACVRL1, ERRFI1, PPP1R13B, RAB3D, SLC2A1, SLC2A5, IFI30, AQP3, CELSR3, STK10, CDH5, THBD, DSTYK, SGCB, LIPH, PSD4, RNPEP, LEPR, ARL6IP5, SLC39A4, RAB8B, TGM2, SEMA6B, DSP, PDGFRA, PRKCH, PAQR5, FRS2, PHKA1, IL17RE, PRSS12, IL17RA, ARL4C, CDCP1, RASA4, OAS3, CLDN7, BLVRB, ITGA6, LCP1, DAGLB, PHLDB2, H2-D1, CSF1R, MTMR1, SEMA7A, NRN1, ARL6, NPR2, SLC41A3, TACSTD2, ZBTB42, ACVR1B, PLD2, APH1C, PRKAR2…	242	4874	19662	1.20022	1	0.620505	0.604653
GOTERM_BP_DIRECT	GO:0008285~negative regulation of cell proliferation	10	3.84615	0.0551221	ACVRL1, CSF1R, CDH5, RIPPLY3, VDR, NRK, WNK2, CD9, PPARG, IRF6	229	384	18082	2.05627	1	1	1
GOTERM_CC_DIRECT	GO:0071944~cell periphery	4	1.53846	0.0566155	CDH5, KRT18, KRT8, MBP	242	71	19662	4.57735	1	0.620505	0.604653
UP_KEYWORDS	ANK repeat	7	2.69231	0.0571729	ANKRD26, ANKRD33B, PPP1R13B, SOWAHB, PPP1R13L, FEM1B, BCOR	259	240	22680	2.55405	0.999999	0.744913	0.723277
UP_KEYWORDS	Transferase	27	10.3846	0.0587276	ACVRL1, CSF1R, NRK, ACVR1B, DUSP16, TGM1, STK10, RPS6KA3, DSTYK, UBE2Q2, PRKAR2A, PIP4K2C, B4GALNT3, PDK2, TGM2, PDGFRA, PRKCH, CDC42BPG, FN3KRP, EIF2AK3, PHKA1, PARP14, PINK1, WNK1, OAS3, WNK2, B3GNT3	259	1654	22680	1.42946	1	0.744913	0.723277
INTERPRO	IPR002013:Synaptojanin, N-terminal	2	0.769231	0.059247	FIG4, SYNJ1	251	5	20594	32.8191	1	1	0.998221
KEGG_PATHWAY	mmu00562:Inositol phosphate metabolism	4	1.53846	0.0595458	MTMR1, SYNJ1, MTMR14, PIP4K2C	99	70	7691	4.43925	0.999836	1	1
UP_SEQ_FEATURE	topological domain:Cytoplasmic	47	18.0769	0.0601458	ACVRL1, CSF1R, CD82, SDC4, PEX11A, NPR2, SLC2A1, TACSTD2, ACVR1B, SLC2A5, AQP3, CELSR3, THBD, CDH5, ITPRIPL1, RDH11, SGCB, LEPR, ARL6IP5, B4GALNT3, SLC39A4, PROM2, GPR157, SEMA6B, PDGFRA, CADM4, PAQR5, EIF2AK3, TMC8, SEMA4F, IL17RE, OSMR, IL17RA, PROCR, PINK1, CDCP1, CCPG1, CLDN7, IL2RB, B3GNT3, ITGA7, CD9, ITGA6, DAGLB, SLC29A3, H2-D1, HCN2	231	2880	18012	1.27249	1	1	1
GOTERM_BP_DIRECT	GO:0043087~regulation of GTPase activity	4	1.53846	0.0605688	ARHGAP8, RASA4, IQGAP3, PROM2	229	71	18082	4.44849	1	1	1
GOTERM_BP_DIRECT	GO:1903307~positive regulation of regulated secretory pathway	2	0.769231	0.0614827	RAB3D, UNC13D	229	5	18082	31.5843	1	1	1
UP_KEYWORDS	Alternative splicing	66	25.3846	0.0620508	ANKRD33B, KDM1B, AMOT, C77080, BZRAP1, DSTYK, UBE2Q2, LIPH, PPP4R4, LEPR, HMCN2, BBX, PHACTR1, SLC39A4, PDGFRA, VPS13C, TMC8, MITF, PHKA1, IL17RE, SHROOM1, OSMR, UNC13D, DOPEY2, WDR81, RASA4, ADSSL1, ITGA7, ITGA6, PPARG, 2310030G06RIK, PHLDB2, MGLL, H2-D1, DCTN1, ARL6, NPR2, SLC41A3, ZBTB42, ZC3HAV1, SBSN, 4932438A13RIK, PLD2, AKAP1, PCBP3, OS9, RDH11, MYH14, MBP, FLNC, SIAE, PROM2, MLKL, CMTM5, …	259	4779	22680	1.20934	1	0.747712	0.725994
UP_SEQ_FEATURE	domain:SAC	2	0.769231	0.0622432	FIG4, SYNJ1	231	5	18012	31.1896	1	1	1
UP_SEQ_FEATURE	site:Stutter	3	1.15385	0.0626891	KRT18, KRT8, KRT7	231	32	18012	7.31006	1	1	1
GOTERM_MF_DIRECT	GO:0030368~interleukin-17 receptor activity	2	0.769231	0.0639377	IL17RE, IL17RA	230	5	17446	30.3409	1	1	1
INTERPRO	IPR002110:Ankyrin repeat	7	2.69231	0.0644662	ANKRD26, ANKRD33B, PPP1R13B, SOWAHB, PPP1R13L, FEM1B, BCOR	251	232	20594	2.47558	1	1	0.998221
GOTERM_BP_DIRECT	GO:0035556~intracellular signal transduction	10	3.84615	0.0664295	RPS6KA3, PINK1, DSTYK, PRKCH, WNK1, RASA4, NPR2, WNK2, CDC42BPG, ARHGEF6	229	400	18082	1.97402	1	1	1
GOTERM_MF_DIRECT	GO:0050839~cell adhesion molecule binding	4	1.53846	0.066635	DSP, CADM4, CLDN7, ITGA7	230	71	17446	4.27336	1	1	1
GOTERM_BP_DIRECT	GO:0045766~positive regulation of angiogenesis	5	1.92308	0.0670669	ACVRL1, LGALS3, VASH2, CTSH, GATA2	229	121	18082	3.26284	1	1	1
GOTERM_BP_DIRECT	GO:0050873~brown fat cell differentiation	3	1.15385	0.0682368	PEX11A, ITGA6, PPARG	229	34	18082	6.96712	1	1	1
GOTERM_MF_DIRECT	GO:0042802~identical protein binding	14	5.38462	0.0691183	STAT2, NPR2, HSPB8, EIF2AK3, FOXJ2, SLC2A1, ASS1, STK10, PPP1R13L, CLDN7, PPARG, LCP1, PIP4K2C, HCN2	230	625	17446	1.69909	1	1	1
UP_SEQ_FEATURE	short sequence motif:WSXWS motif	3	1.15385	0.0697506	IL2RB, LEPR, OSMR	231	34	18012	6.88006	1	1	1
INTERPRO	IPR024678:Serine/threonine-protein kinase OSR1/WNK, CCT domain	2	0.769231	0.07067	WNK1, WNK2	251	6	20594	27.3493	1	1	0.998221
INTERPRO	IPR019018:Rab-binding domain FIP-RBD	2	0.769231	0.07067	RAB11FIP1, RAB11FIP5	251	6	20594	27.3493	1	1	0.998221
INTERPRO	IPR013568:SEFIR	2	0.769231	0.07067	IL17RE, IL17RA	251	6	20594	27.3493	1	1	0.998221
INTERPRO	IPR003529:Long hematopoietin receptor, Gp130 family 2, conserved site	2	0.769231	0.07067	LEPR, OSMR	251	6	20594	27.3493	1	1	0.998221
GOTERM_CC_DIRECT	GO:0005829~cytosol	30	11.5385	0.0713857	ERRFI1, DCTN1, ARL6, SLC2A1, DUSP16, ZFP36L3, HEBP1, DSTYK, PCBP3, RHPN1, KIF13B, CTSH, PHACTR1, LDLRAP1, TGM2, PRKCH, VDR, VPS13C, ANGEL1, KIF9, PINK1, SYNJ1, RASA4, WNK1, DNAJA4, WNK2, BLVRB, PPARG, LCP1, MGLL	242	1784	19662	1.36628	1	0.752296	0.733076
GOTERM_BP_DIRECT	GO:0048514~blood vessel morphogenesis	3	1.15385	0.0717893	ACVRL1, ITGA7, AMOT	229	35	18082	6.76806	1	1	1
GOTERM_BP_DIRECT	GO:0006531~aspartate metabolic process	2	0.769231	0.07332	ADSSL1, ASS1	229	6	18082	26.3202	1	1	1
GOTERM_BP_DIRECT	GO:0050819~negative regulation of coagulation	2	0.769231	0.07332	THBD, PROCR	229	6	18082	26.3202	1	1	1
GOTERM_BP_DIRECT	GO:2000021~regulation of ion homeostasis	2	0.769231	0.07332	WNK1, WNK2	229	6	18082	26.3202	1	1	1
SMART	SM00630:Sema	3	1.15385	0.0737506	SEMA6B, SEMA7A, SEMA4F	152	31	10425	6.63731	0.99998	1	1
GOTERM_BP_DIRECT	GO:0048015~phosphatidylinositol-mediated signaling	3	1.15385	0.0754005	CSF1R, PDGFRA, SYNJ1	229	36	18082	6.58006	1	1	1
INTERPRO	IPR020683:Ankyrin repeat-containing domain	7	2.69231	0.0754904	ANKRD26, ANKRD33B, PPP1R13B, SOWAHB, PPP1R13L, FEM1B, BCOR	251	242	20594	2.37328	1	1	0.998221
GOTERM_MF_DIRECT	GO:0098641~cadherin binding involved in cell-cell adhesion	8	3.07692	0.0756277	CNN2, KRT18, PPP1R13L, MYO6, EFHD2, ITGA6, ZC3HAV1, PHLDB2	230	279	17446	2.17497	1	1	1
UP_KEYWORDS	ADP-ribosylation	3	1.15385	0.0758358	EIF2AK3, ITGA7, DNASE1L3	259	40	22680	6.56757	1	0.805773	0.782368
UP_KEYWORDS	Cell junction	13	5	0.0759527	DSP, NRN1, ATN1, AMOT, CDH5, DSTYK, 9430020K01RIK, CLDN7, ZYX, PHACTR1, LCP1, TNS4, TJP3	259	661	22680	1.72221	1	0.805773	0.782368
UP_KEYWORDS	Disulfide bond	45	17.3077	0.0768995	ACVRL1, CSF1R, SEMA7A, GRN, NPR2, TACSTD2, LAMC2, IFI30, CELSR3, WFDC2, CTSR, FSTL3, THBD, LGALS3, HMGCL, GM2A, OS9, SGCB, LIPH, CTSJ, LIPG, LEPR, HMCN2, CTSH, CILP2, SIAE, PLTP, SEMA6B, PDGFRA, CADM4, NAGA, SEMA4F, OSMR, PRSS12, IL17RA, EFNA1, PROCR, CDCP1, IL2RB, ITGA7, PLBD1, CD9, ITGA6, DNASE1L3, H2-D1	259	3124	22680	1.26138	1	0.805773	0.782368
INTERPRO	IPR004087:K Homology domain	3	1.15385	0.0775892	PCBP3, IGF2BP3, AKAP1	251	38	20594	6.47746	1	1	0.998221
GOTERM_BP_DIRECT	GO:0045444~fat cell differentiation	4	1.53846	0.0780118	ARL6, EIF2AK3, PPARG, 4932438A13RIK	229	79	18082	3.99801	1	1	1
INTERPRO	IPR016243:Tyrosine-protein kinase, CSF-1/PDGF receptor	2	0.769231	0.0819549	CSF1R, PDGFRA	251	7	20594	23.4422	1	1	0.998221
INTERPRO	IPR003605:TGF beta receptor, GS motif	2	0.769231	0.0819549	ACVRL1, ACVR1B	251	7	20594	23.4422	1	1	0.998221
GOTERM_BP_DIRECT	GO:0042594~response to starvation	3	1.15385	0.0827909	HMGCL, ADSSL1, PPARG	229	38	18082	6.23374	1	1	1
GOTERM_BP_DIRECT	GO:0006526~arginine biosynthetic process	2	0.769231	0.0850086	GM5424, ASS1	229	7	18082	22.5602	1	1	1
GOTERM_BP_DIRECT	GO:0031346~positive regulation of cell projection organization	2	0.769231	0.0850086	RAB8B, PROM2	229	7	18082	22.5602	1	1	1
GOTERM_BP_DIRECT	GO:0034720~histone H3-K4 demethylation	2	0.769231	0.0850086	KDM5A, KDM1B	229	7	18082	22.5602	1	1	1
UP_SEQ_FEATURE	domain:GS	2	0.769231	0.0860465	ACVRL1, ACVR1B	231	7	18012	22.2783	1	1	1
UP_SEQ_FEATURE	domain:WWE	2	0.769231	0.0860465	ZC3HAV1, PARP14	231	7	18012	22.2783	1	1	1
GOTERM_BP_DIRECT	GO:0098609~cell-cell adhesion	6	2.30769	0.0914422	CNN2, PPP1R13L, MYO6, EFHD2, TACSTD2, ZC3HAV1	229	189	18082	2.50669	1	1	1
INTERPRO	IPR019821:Kinesin, motor region, conserved site	3	1.15385	0.0921247	KIF9, KIF5A, KIF13B	251	42	20594	5.86056	1	1	0.998221
UP_SEQ_FEATURE	topological domain:Extracellular	37	14.2308	0.09256	ACVRL1, CSF1R, CD82, SDC4, NPR2, SLC2A1, TACSTD2, ACVR1B, SLC2A5, AQP3, CELSR3, THBD, CDH5, ITPRIPL1, SGCB, LEPR, SLC39A4, PROM2, GPR157, SEMA6B, PDGFRA, CADM4, PAQR5, SEMA4F, IL17RE, OSMR, IL17RA, PROCR, CDCP1, CLDN7, IL2RB, ITGA7, CD9, ITGA6, DAGLB, SLC29A3, H2-D1	231	2256	18012	1.27883	1	1	1
INTERPRO	IPR001102:Transglutaminase, N-terminal	2	0.769231	0.0931032	TGM1, TGM2	251	8	20594	20.512	1	1	0.998221
INTERPRO	IPR001824:Tyrosine-protein kinase, receptor class III, conserved site	2	0.769231	0.0931032	CSF1R, PDGFRA	251	8	20594	20.512	1	1	0.998221
INTERPRO	IPR026854:Vacuolar protein sorting-associated protein 13A N-terminal domain	2	0.769231	0.0931032	VPS13C, ATG2A	251	8	20594	20.512	1	1	0.998221
GOTERM_CC_DIRECT	GO:0009925~basal plasma membrane	3	1.15385	0.0936311	TACSTD2, ITGA6, LDLRAP1	242	42	19662	5.80342	1	0.919545	0.896053
GOTERM_CC_DIRECT	GO:0016460~myosin II complex	2	0.769231	0.0939681	MYH14, SHROOM1	242	8	19662	20.312	1	0.919545	0.896053
INTERPRO	IPR008936:Rho GTPase activation protein	4	1.53846	0.094153	ARHGAP9, ARHGAP8, RASA4, IQGAP3	251	89	20594	3.68754	1	1	0.998221
GOTERM_BP_DIRECT	GO:0097191~extrinsic apoptotic signaling pathway	3	1.15385	0.0942672	KRT18, KRT8, ACVR1B	229	41	18082	5.77761	1	1	1
GOTERM_BP_DIRECT	GO:0031642~negative regulation of myelination	2	0.769231	0.0965504	FIG4, EIF2AK3	229	8	18082	19.7402	1	1	1
PIR_SUPERFAMILY	PIRSF000615:tyrosine-protein kinase, CSF-1/PDGF receptor type	2	0.769231	0.0966282	CSF1R, PDGFRA	27	7	1807	19.1217	0.928792	1	1
SMART	SM00467:GS	2	0.769231	0.0971167	ACVRL1, ACVR1B	152	7	10425	19.5959	0.999999	1	1
UP_SEQ_FEATURE	sequence variant	10	3.84615	0.0979982	ANKRD26, UBE2Q2, MYO6, CTSJ, LEPR, BBX, SEMA4F, MITF, PARP14, H2-D1	231	429	18012	1.81758	1	1	1

## Sheet: Genes up KO_down SAM
99 common elements in "up in KO" and "down in SAM":
G0s2
Gm10664
Mid1
Zfp945
Gm15286
Mlana
Dclk1
Aim2
Nfib
Rnf165
Tcf15
Armcx4
Adora1
Cdh4
Vgf
Serpinb1a
Prex2
Snx24
Ddah2
Rab27a
Ssh2
Sema3g
Syt13
T
Coro2b
Elmo1
Cyba
Dbn1
Etv6
Mpped2
Zswim6
Popdc3
Gm98
Msi2
Uck2
D430041D05Rik
Fchsd2
Zfp27
Atat1
Myo1b
Ccdc88a
2810025M15Rik
1810020D17Rik
Sh3gl3
Limd2
Zfp329
Socs3
Slc7a6
Glo1
Etv5
Iqgap2
Zscan21
Plcb4
Pdf
Gdi1
Srpk2
Lclat1
Insm1
Tead2
Pih1d1
Relt
B3gnt2
Dck
Fiz1
Gnaq
Cep78
Clns1a
Psmc4
Ncbp2
Ppp5c
Prmt1
Ndufv2
Trim28
Nudt3
Fam108c
Spcs2
Gemin4
Ppme1
Nsmce4a
Ogfr
Prkce
Prpf31
Lsm14a
2310008H09Rik
Commd1
Rnf121
Fgfbp1
Zfp146
Uba2
Txlng
Zfp110
Zfp865
Tsg101
Bccip
Glod4
Nosip
Ciapin1
Fbl
Rpap2

## Sheet: DAVID_up KO_down SAM
Category	Term	Count	%	PValue	Genes	List Total	Pop Hits	Pop Total	Fold Enrichment	Bonferroni	Benjamini	FDR
UP_KEYWORDS	Nucleus	36	37.8947	3.63057e-05	ZFP865, OGFR, TSG101, ZFP329, BCCIP, TXLNG, RPAP2, FBL, T, TRIM28, ZFP146, TEAD2, SRPK2, TCF15, PRMT1, NCBP2, PRKCE, NOSIP, COMMD1, DCK, ETV5, ETV6, PPP5C, AIM2, NFIB, PSMC4, GNAQ, CLNS1A, ZSCAN21, UBA2, FIZ1, PRPF31, CIAPIN1, INSM1, ZFP27, ZFP110	92	4534	22680	1.95738	0.00525058	0.00307117	0.00294409
UP_KEYWORDS	Phosphoprotein	50	52.6316	5.39424e-05	OGFR, GDI1, ZFP329, BCCIP, MSI2, FBL, TRIM28, PPME1, TCF15, PRMT1, NCBP2, PRKCE, PIH1D1, NOSIP, CYBA, MID1, DCK, ETV5, ETV6, SLC7A6, FCHSD2, CLNS1A, ELMO1, DBN1, TSG101, GLO1, TXLNG, IQGAP2, RPAP2, SOCS3, SERPINB1A, NDUFV2, RELT, CEP78, SRPK2, SNX24, RAB27A, SSH2, DCLK1, ATAT1, CCDC88A, UCK2, MYO1B, PSMC4, NFIB, GLOD4, UBA2, PRPF31, CIAPIN1, LSM14A	92	7617	22680	1.61823	0.00779134	0.00307117	0.00294409
UP_KEYWORDS	Acetylation	28	29.4737	6.35415e-05	OGFR, TSG101, GDI1, GLO1, MSI2, RPAP2, LCLAT1, NUDT3, LIMD2, TRIM28, NDUFV2, NCBP2, SNX24, RAB27A, ETV6, ATAT1, SPCS2, UCK2, PPP5C, PSMC4, CLNS1A, ELMO1, UBA2, FIZ1, PRPF31, LSM14A, DBN1, RNF121	92	3125	22680	2.20883	0.00917149	0.00307117	0.00294409
UP_KEYWORDS	Metal-binding	29	30.5263	0.000101229	ZFP865, ZFP329, ZFP945, GLO1, RPAP2, NUDT3, LIMD2, CDH4, PDF, TRIM28, ZSWIM6, NDUFV2, ZFP146, PRKCE, CYBA, COMMD1, MID1, PPP5C, GNAQ, MPPED2, ZSCAN21, UBA2, FIZ1, CIAPIN1, INSM1, ZFP27, RNF165, RNF121, ZFP110	92	3395	22680	2.10578	0.0145717	0.00365882	0.00350742
UP_KEYWORDS	Cytoplasm	34	35.7895	0.000126166	OGFR, SH3GL3, TSG101, GDI1, TXLNG, MSI2, RPAP2, NUDT3, SERPINB1A, RELT, CEP78, SRPK2, PRMT1, NCBP2, PRKCE, NOSIP, COMMD1, SSH2, CORO2B, MID1, ATAT1, CCDC88A, PPP5C, AIM2, DDAH2, PSMC4, CLNS1A, ELMO1, UBA2, FIZ1, CIAPIN1, LSM14A, DBN1, ZFP110	92	4404	22680	1.90321	0.0181289	0.00365882	0.00350742
GOTERM_CC_DIRECT	GO:0005634~nucleus	43	45.2632	0.000548538	ZFP865, OGFR, TSG101, ZFP329, BCCIP, TXLNG, RPAP2, NUDT3, FBL, T, TRIM28, ZFP146, TEAD2, SRPK2, TCF15, PRMT1, NCBP2, PRKCE, PIH1D1, NOSIP, CYBA, COMMD1, DCK, ETV5, ETV6, PPP5C, AIM2, NSMCE4A, PLCB4, NFIB, PSMC4, GNAQ, CLNS1A, ZSCAN21, GEMIN4, UBA2, FIZ1, PRPF31, CIAPIN1, INSM1, ZFP27, RNF165, ZFP110	89	6019	19662	1.57827	0.0865563	0.0905087	0.0905087
GOTERM_CC_DIRECT	GO:0005737~cytoplasm	45	47.3684	0.00115196	OGFR, SH3GL3, TSG101, GDI1, TXLNG, MSI2, IQGAP2, RPAP2, NUDT3, SOCS3, SERPINB1A, T, ZFP146, RELT, CEP78, SRPK2, PRMT1, NCBP2, PRKCE, PIH1D1, NOSIP, CYBA, COMMD1, SSH2, CORO2B, MID1, ETV6, ATAT1, CCDC88A, PPP5C, MYO1B, AIM2, PLCB4, DDAH2, PSMC4, CLNS1A, ELMO1, GEMIN4, UBA2, FIZ1, CIAPIN1, LSM14A, DBN1, RNF165, ZFP110	89	6631	19662	1.49924	0.173192	0.0950369	0.0950369
UP_KEYWORDS	Zinc-finger	16	16.8421	0.00135536	ZFP865, ZFP945, ZFP329, PRKCE, MID1, RPAP2, TRIM28, ZSCAN21, FIZ1, ZSWIM6, INSM1, ZFP27, ZFP146, RNF165, RNF121, ZFP110	92	1565	22680	2.52035	0.178531	0.0318141	0.0304976
UP_KEYWORDS	Zinc	19	20	0.00153585	ZFP865, ZFP945, ZFP329, PRKCE, GLO1, MID1, RPAP2, LIMD2, TRIM28, ZSCAN21, UBA2, FIZ1, ZSWIM6, INSM1, ZFP27, ZFP146, RNF165, RNF121, ZFP110	92	2099	22680	2.2315	0.199781	0.0318141	0.0304976
UP_SEQ_FEATURE	zinc finger region:C2H2-type 5	6	6.31579	0.00162816	ZFP329, ZSCAN21, FIZ1, INSM1, ZFP27, ZFP146	80	194	18012	6.9634	0.368411	0.240354	0.237807
UP_KEYWORDS	Transcription regulation	17	17.8947	0.00200762	ZFP865, TCF15, ZFP329, PIH1D1, TXLNG, COMMD1, RPAP2, ETV6, T, TRIM28, NFIB, ZSCAN21, FIZ1, INSM1, ZFP27, TEAD2, ZFP110	92	1799	22680	2.32956	0.252781	0.0363881	0.0348824
UP_SEQ_FEATURE	zinc finger region:C2H2-type 7	5	5.26316	0.00249239	ZFP329, ZSCAN21, FIZ1, ZFP27, ZFP146	80	129	18012	8.72674	0.505264	0.240354	0.237807
UP_SEQ_FEATURE	zinc finger region:C2H2-type 4	6	6.31579	0.00254793	ZFP329, ZSCAN21, FIZ1, INSM1, ZFP27, ZFP146	80	215	18012	6.28326	0.512971	0.240354	0.237807
UP_KEYWORDS	Transcription	17	17.8947	0.00279538	ZFP865, TCF15, ZFP329, PIH1D1, TXLNG, COMMD1, RPAP2, ETV6, T, TRIM28, NFIB, ZSCAN21, FIZ1, INSM1, ZFP27, TEAD2, ZFP110	92	1859	22680	2.25437	0.333622	0.0450367	0.0431731
GOTERM_CC_DIRECT	GO:0005730~nucleolus	11	11.5789	0.00433933	SRPK2, FBL, TSG101, TRIM28, NFIB, PIH1D1, GEMIN4, CIAPIN1, ZFP146, RPAP2, ETV6	89	842	19662	2.88615	0.512052	0.238663	0.238663
UP_SEQ_FEATURE	zinc finger region:C2H2-type 6	5	5.26316	0.00448607	ZFP329, ZSCAN21, FIZ1, ZFP27, ZFP146	80	152	18012	7.40625	0.718583	0.293335	0.290226
UP_SEQ_FEATURE	zinc finger region:C2H2-type 3	6	6.31579	0.00579764	ZFP329, ZSCAN21, FIZ1, INSM1, ZFP27, ZFP146	80	261	18012	5.17586	0.80596	0.293335	0.290226
INTERPRO	IPR013087:Zinc finger C2H2-type/integrase DNA-binding domain	9	9.47368	0.00629328	ZFP865, ZFP945, ZFP329, ZSCAN21, FIZ1, INSM1, ZFP27, ZFP146, ZFP110	88	652	20594	3.23038	0.756868	0.901741	0.901741
UP_SEQ_FEATURE	zinc finger region:C2H2-type 2	6	6.31579	0.00646999	ZFP329, ZSCAN21, FIZ1, INSM1, ZFP27, ZFP146	80	268	18012	5.04067	0.839661	0.293335	0.290226
GOTERM_MF_DIRECT	GO:0046872~metal ion binding	27	28.4211	0.00678342	ZFP865, ZFP329, ZFP945, GLO1, RPAP2, LIMD2, CDH4, PDF, TRIM28, ZSWIM6, NDUFV2, ZFP146, PRKCE, CYBA, COMMD1, MID1, PPP5C, GNAQ, MPPED2, ZSCAN21, UBA2, FIZ1, CIAPIN1, INSM1, ZFP27, RNF121, ZFP110	85	3355	17446	1.65176	0.791017	1	1
UP_SEQ_FEATURE	zinc finger region:C2H2-type 10	4	4.21053	0.00725565	ZFP329, FIZ1, ZFP27, ZFP146	80	90	18012	10.0067	0.871722	0.293335	0.290226
INTERPRO	IPR015880:Zinc finger, C2H2-like	9	9.47368	0.00894292	ZFP865, ZFP945, ZFP329, ZSCAN21, FIZ1, INSM1, ZFP27, ZFP146, ZFP110	88	693	20594	3.03926	0.866309	0.901741	0.901741
GOTERM_BP_DIRECT	GO:0006355~regulation of transcription, DNA-templated	20	21.0526	0.00972393	TCF15, ZFP945, PRMT1, ZFP329, PIH1D1, TXLNG, COMMD1, RPAP2, ETV5, ETV6, T, TRIM28, NFIB, ZSCAN21, FIZ1, INSM1, ZFP27, ZFP146, TEAD2, ZFP110	87	2279	18082	1.82395	0.997266	1	1
GOTERM_MF_DIRECT	GO:0003700~transcription factor activity, sequence-specific DNA binding	11	11.5789	0.00974977	T, TRIM28, NFIB, ZSCAN21, INSM1, ZFP27, ZFP146, TEAD2, ETV5, ETV6, ZFP110	85	883	17446	2.55687	0.894964	1	1
UP_SEQ_FEATURE	zinc finger region:C2H2-type 9	4	4.21053	0.00994533	ZFP329, FIZ1, ZFP27, ZFP146	80	101	18012	8.91683	0.940312	0.351816	0.348086
INTERPRO	IPR007087:Zinc finger, C2H2	9	9.47368	0.0120769	ZFP865, ZFP945, ZFP329, ZSCAN21, FIZ1, INSM1, ZFP27, ZFP146, ZFP110	88	731	20594	2.88126	0.934237	0.901741	0.901741
GOTERM_CC_DIRECT	GO:0005829~cytosol	16	16.8421	0.0123855	PRMT1, PRKCE, RAB27A, TXLNG, DCK, CCDC88A, SOCS3, UCK2, PPP5C, AIM2, CLNS1A, GNAQ, GEMIN4, UBA2, INSM1, ZFP110	89	1784	19662	1.98136	0.872082	0.510902	0.510902
SMART	SM00355:ZnF_C2H2	9	9.47368	0.0145986	ZFP865, ZFP945, ZFP329, ZSCAN21, FIZ1, INSM1, ZFP27, ZFP146, ZFP110	50	693	10425	2.70779	0.598193	0.905111	0.905111
GOTERM_MF_DIRECT	GO:0005547~phosphatidylinositol-3,4,5-trisphosphate binding	3	3.15789	0.015125	MYO1B, COMMD1, IQGAP2	85	39	17446	15.7882	0.969963	1	1
GOTERM_BP_DIRECT	GO:0006351~transcription, DNA-templated	17	17.8947	0.0153151	ZFP865, TCF15, ZFP329, PIH1D1, TXLNG, COMMD1, RPAP2, ETV6, T, TRIM28, NFIB, ZSCAN21, FIZ1, INSM1, ZFP27, TEAD2, ZFP110	87	1885	18082	1.87441	0.999911	1	1
UP_SEQ_FEATURE	zinc finger region:C2H2-type 8	4	4.21053	0.0154513	ZFP329, FIZ1, ZFP27, ZFP146	80	119	18012	7.56807	0.987615	0.485858	0.480707
GOTERM_CC_DIRECT	GO:0015030~Cajal body	3	3.15789	0.0187904	FBL, GEMIN4, PRPF31	89	47	19662	14.1014	0.956278	0.620082	0.620082
GOTERM_BP_DIRECT	GO:0048254~snoRNA localization	2	2.10526	0.0188907	FBL, PIH1D1	87	4	18082	103.92	0.99999	1	1
UP_KEYWORDS	Growth regulation	3	3.15789	0.0206021	OGFR, SOCS3, TSG101	92	55	22680	13.4466	0.951126	0.29873	0.286369
KEGG_PATHWAY	mmu04071:Sphingolipid signaling pathway	4	4.21053	0.0213347	PLCB4, PRKCE, GNAQ, ADORA1	38	124	7691	6.52886	0.871101	1	1
GOTERM_BP_DIRECT	GO:1990182~exosomal secretion	2	2.10526	0.023558	TSG101, RAB27A	87	5	18082	83.1356	0.999999	1	1
GOTERM_MF_DIRECT	GO:0051015~actin filament binding	4	4.21053	0.0258705	MYO1B, IQGAP2, CORO2B, DBN1	85	132	17446	6.21961	0.997591	1	1
UP_KEYWORDS	DNA-binding	13	13.6842	0.0264517	ZFP865, TCF15, ZFP329, ETV5, ETV6, AIM2, T, NFIB, ZSCAN21, INSM1, ZFP146, TEAD2, ZFP110	92	1604	22680	1.99799	0.979496	0.348682	0.334253
UP_SEQ_FEATURE	zinc finger region:C2H2-type 1	5	5.26316	0.0284612	ZFP329, ZSCAN21, FIZ1, ZFP27, ZFP146	80	263	18012	4.28042	0.999709	0.805452	0.796914
GOTERM_BP_DIRECT	GO:1903428~positive regulation of reactive oxygen species biosynthetic process	2	2.10526	0.0374286	RAB27A, CYBA	87	8	18082	51.9598	1	1	1
UP_KEYWORDS	Methylation	9	9.47368	0.038905	ATAT1, FBL, NFIB, NCBP2, PPME1, RAB27A, TXLNG, MSI2, LSM14A	92	960	22680	2.31114	0.99683	0.470102	0.45065
GOTERM_CC_DIRECT	GO:0071944~cell periphery	3	3.15789	0.0403248	PPP5C, MYO1B, PRKCE	89	71	19662	9.3347	0.998877	0.961134	0.961134
GOTERM_MF_DIRECT	GO:0044822~poly(A) RNA binding	11	11.5789	0.0408167	SRPK2, FBL, TRIM28, PRMT1, NCBP2, CLNS1A, BCCIP, NOSIP, PRPF31, MSI2, LSM14A	85	1113	17446	2.0285	0.999931	1	1
GOTERM_BP_DIRECT	GO:0035556~intracellular signal transduction	6	6.31579	0.0419729	SRPK2, PREX2, SOCS3, PLCB4, PRKCE, DCLK1	87	400	18082	3.11759	1	1	1
UP_KEYWORDS	Developmental protein	9	9.47368	0.0422071	T, TCF15, ZSCAN21, NOSIP, INSM1, LCLAT1, LSM14A, DBN1, DCLK1	92	976	22680	2.27325	0.998075	0.470772	0.451292
GOTERM_BP_DIRECT	GO:0040008~regulation of growth	3	3.15789	0.0427136	OGFR, SOCS3, TSG101	87	69	18082	9.03648	1	1	1
UP_SEQ_FEATURE	zinc finger region:C2H2-type 11	3	3.15789	0.0428986	ZFP329, FIZ1, ZFP27	80	75	18012	9.006	0.999996	1	0.992908
KEGG_PATHWAY	mmu04022:cGMP-PKG signaling pathway	4	4.21053	0.0429271	PLCB4, PRKCE, GNAQ, ADORA1	38	163	7691	4.96674	0.98452	1	1
GOTERM_MF_DIRECT	GO:0005515~protein binding	28	29.4737	0.0431019	SH3GL3, TSG101, TXLNG, SOCS3, T, TRIM28, ADORA1, TEAD2, PRMT1, PRKCE, PIH1D1, RAB27A, CYBA, COMMD1, MID1, ETV6, CCDC88A, PPP5C, AIM2, PLCB4, GNAQ, ELMO1, UBA2, FIZ1, INSM1, DBN1, RNF165, ZFP110	85	4092	17446	1.40443	0.99996	1	1
KEGG_PATHWAY	mmu04924:Renin secretion	3	3.15789	0.0454727	PLCB4, GNAQ, ADORA1	38	71	7691	8.55189	0.98798	1	1
GOTERM_BP_DIRECT	GO:0070257~positive regulation of mucus secretion	2	2.10526	0.0465673	PRKCE, CYBA	87	10	18082	41.5678	1	1	1
GOTERM_CC_DIRECT	GO:0030175~filopodium	3	3.15789	0.046676	MYO1B, IQGAP2, DBN1	89	77	19662	8.60733	0.999624	0.961134	0.961134
GOTERM_MF_DIRECT	GO:0019206~nucleoside kinase activity	2	2.10526	0.0471305	UCK2, DCK	85	10	17446	41.0494	0.999985	1	1
GOTERM_BP_DIRECT	GO:0048339~paraxial mesoderm development	2	2.10526	0.0511045	TCF15, TEAD2	87	11	18082	37.7889	1	1	1
GOTERM_MF_DIRECT	GO:0000981~RNA polymerase II transcription factor activity, sequence-specific DNA binding	4	4.21053	0.0516955	T, NFIB, ETV5, ZFP110	85	174	17446	4.71832	0.999995	1	1
GOTERM_CC_DIRECT	GO:0034709~methylosome	2	2.10526	0.0524194	PRMT1, CLNS1A	89	12	19662	36.8202	0.999861	0.961134	0.961134
GOTERM_CC_DIRECT	GO:0005622~intracellular	13	13.6842	0.0524255	GDI1, ZFP945, RAB27A, MID1, DCLK1, PREX2, SOCS3, SPCS2, TRIM28, NFIB, ZFP27, DBN1, ZFP110	89	1599	19662	1.79611	0.999862	0.961134	0.961134
GOTERM_BP_DIRECT	GO:0007275~multicellular organism development	10	10.5263	0.0554319	T, TCF15, ZSCAN21, NOSIP, INSM1, RELT, LCLAT1, LSM14A, DBN1, DCLK1	87	1029	18082	2.01982	1	1	1
GOTERM_MF_DIRECT	GO:0003677~DNA binding	15	15.7895	0.0572981	ZFP865, TCF15, ZFP329, SSH2, ETV5, ETV6, AIM2, T, TRIM28, NFIB, ZSCAN21, INSM1, ZFP146, TEAD2, ZFP110	85	1847	17446	1.66687	0.999999	1	1
UP_SEQ_FEATURE	domain:IQ 3	2	2.10526	0.0597043	MYO1B, IQGAP2	80	14	18012	32.1643	1	1	0.992908
UP_SEQ_FEATURE	zinc finger region:B box-type 1	2	2.10526	0.0597043	TRIM28, MID1	80	14	18012	32.1643	1	1	0.992908
GOTERM_BP_DIRECT	GO:0030903~notochord development	2	2.10526	0.0601148	T, TEAD2	87	13	18082	31.9752	1	1	1
INTERPRO	IPR003649:B-box, C-terminal	2	2.10526	0.0615483	TRIM28, MID1	88	15	20594	31.203	0.999999	1	1
UP_KEYWORDS	Repressor	6	6.31579	0.0637666	TRIM28, FIZ1, INSM1, LSM14A, ETV6, ZFP110	92	534	22680	2.76991	0.999929	0.66044	0.633111
KEGG_PATHWAY	mmu04925:Aldosterone synthesis and secretion	3	3.15789	0.0639678	PLCB4, PRKCE, GNAQ	38	86	7691	7.06028	0.998127	1	1
GOTERM_BP_DIRECT	GO:0051279~regulation of release of sequestered calcium ion into cytosol	2	2.10526	0.0645882	PRKCE, CYBA	87	14	18082	29.6913	1	1	1
GOTERM_BP_DIRECT	GO:0043267~negative regulation of potassium ion transport	2	2.10526	0.0645882	PLCB4, GNAQ	87	14	18082	29.6913	1	1	1
SMART	SM00502:BBC	2	2.10526	0.0682749	TRIM28, MID1	50	15	10425	27.8	0.987531	1	1
GOTERM_CC_DIRECT	GO:0032279~asymmetric synapse	2	2.10526	0.0692815	ADORA1, DBN1	89	16	19662	27.6152	0.999993	1	1
COG_ONTOLOGY	Nucleotide transport and metabolism	2	2.10526	0.0711372	UCK2, DCK	14	12	2126	25.3095	0.2556	0.284549	0.284549
UP_SEQ_FEATURE	zinc finger region:B box-type 2	2	2.10526	0.0720326	TRIM28, MID1	80	17	18012	26.4882	1	1	0.992908
GOTERM_MF_DIRECT	GO:0003676~nucleic acid binding	11	11.5789	0.0729215	ZFP865, ZFP945, NCBP2, ZFP329, ZSCAN21, FIZ1, MSI2, INSM1, ZFP27, ZFP146, ZFP110	85	1237	17446	1.82516	1	1	1
UP_KEYWORDS	Neurogenesis	4	4.21053	0.0772788	CCDC88A, INSM1, DBN1, DCLK1	92	247	22680	3.99225	0.999991	0.690858	0.662271
GOTERM_BP_DIRECT	GO:0030154~cell differentiation	8	8.42105	0.0777039	SRPK2, TSG101, ZSCAN21, INSM1, DBN1, DCLK1, ETV5, ETV6	87	780	18082	2.13168	1	1	1
GOTERM_MF_DIRECT	GO:0003779~actin binding	5	5.26316	0.0802643	CCDC88A, MYO1B, SSH2, CORO2B, DBN1	85	338	17446	3.0362	1	1	1
GOTERM_CC_DIRECT	GO:0005769~early endosome	4	4.21053	0.0809438	SH3GL3, MYO1B, TSG101, COMMD1	89	226	19662	3.91011	0.999999	1	1
UP_KEYWORDS	Actin-binding	4	4.21053	0.0809518	MYO1B, SSH2, CORO2B, DBN1	92	252	22680	3.91304	0.999995	0.690858	0.662271
UP_KEYWORDS	2Fe-2S	2	2.10526	0.0809972	CIAPIN1, NDUFV2	92	21	22680	23.4783	0.999995	0.690858	0.662271
KEGG_PATHWAY	mmu04922:Glucagon signaling pathway	3	3.15789	0.0831196	PLCB4, PRMT1, GNAQ	38	100	7691	6.07184	0.999737	1	1
UP_KEYWORDS	Alternative splicing	26	27.3684	0.0879433	OGFR, TXLNG, MSI2, RPAP2, PREX2, TRIM28, ZSWIM6, NDUFV2, PRMT1, NOSIP, CYBA, SSH2, MID1, DCLK1, ATAT1, CCDC88A, SLC7A6, MYO1B, FCHSD2, NFIB, GLOD4, ELMO1, PRPF31, ZFP27, DBN1, RNF121	92	4779	22680	1.34119	0.999998	0.708432	0.679118
GOTERM_CC_DIRECT	GO:0014069~postsynaptic density	4	4.21053	0.0920169	PLCB4, ADORA1, DBN1, DCLK1	89	239	19662	3.69743	1	1	1
GOTERM_MF_DIRECT	GO:0000978~RNA polymerase II core promoter proximal region sequence-specific DNA binding	5	5.26316	0.0949975	T, NFIB, ZSCAN21, INSM1, ETV6	85	359	17446	2.85859	1	1	1
UP_KEYWORDS	Protein phosphatase	3	3.15789	0.0960954	PPP5C, SSH2, RPAP2	92	130	22680	5.68896	1	0.73336	0.703014
SMART	SM00184:RING	4	4.21053	0.0970398	TRIM28, MID1, RNF165, RNF121	50	234	10425	3.5641	0.998216	1	1
